# Supplementary material for: Reduced purine biosynthesis in humans after their divergence from Neandertals
Source: eLife. 2021 May 4;10:e58741. doi: 10.7554/eLife.58741 (PMC8133780; doi:10.7554/eLife.58741)
Supplement: Supplementary file 1. [file elife-58741-supp1.xlsx]

## Sheet: Suppl.Table.1
Supplementary Table 1. The MS signal intensities of metabolites detected by CE-MS in five tissues of four humans, four chimpanzees, and four rhesus macaques, reflecting their relative concentrations.
PFC - prefrontal cortex
CB - cerebellum
VC - visual cortex
chimp. - chimpanzee
	human.PFC	human.PFC	human.PFC	human.PFC	human.CB	human.CB	human.CB	human.CB	human.VC	human.VC	human.VC	human.VC	human.kidney	human.kidney	human.kidney	human.kidney	human.muscle	human.muscle	human.muscle	human.muscle	rhesus.PFC	rhesus.PFC	rhesus.PFC	rhesus.PFC	rhesus.CB	rhesus.CB	rhesus.CB	rhesus.CB	rhesus.VC	rhesus.VC	rhesus.VC	rhesus.VC	rhesus.kidney	rhesus.kidney	rhesus.kidney	rhesus.kidney	rhesus.muscle	rhesus.muscle	rhesus.muscle	rhesus.muscle	chimp.PFC	chimp.PFC	chimp.PFC	chimp.PFC	chimp.CB	chimp.CB	chimp.CB	chimp.CB	chimp.VC
Urea	1.8	1.8	0.55	2	1	3.9	2	1.3	0.79	1.1	0.88	1.5	1.8	1.8	0.74	0.93	1.2	1.7	0.79	0.96	2.1	2.3	1.6	1.4	0.71	1.5	1.6	1.9	1.5	1.1	2	2.1	5.2	2.1	3.7	2.1	2.7	2.6	2.3	2	3.4	1.7	0.89	1	0.98	2.2	0.88	0.51	0.93
Methylguanidine	0	0	0	0	0	0	0	0	0	0	0	0.0048	0	0	0	0	0	0	0.0058	0.0085	0	0	0	0.0053	0	0.0053	0	0	0	0	0	0.0063	0	0.0058	0	0.0056	0	0	0	0	0	0	0	0	0	0	0	0.002	0.0037
Gly	1.4	1	0.6	0.58	1.5	1.1	1.3	1.5	1.5	1.4	0.96	1.3	2	0.74	0.82	0.45	2.2	0.53	0.67	0.45	0.32	0.4	0.38	0.3	0.18	0.31	0.31	0.5	0.19	0.19	0.3	0.31	1.5	1.1	1.7	1.3	0.33	0.34	0.59	0.78	0.41	0.36	0.27	0.43	0.34	0.38	0.48	0.23	0.5
Isopropanolamine	0.0022	0.00095	0	0	0.0012	0	0.0011	0.0011	0.0011	0	0.00035	0.00069	0.00098	0	0	0	0.00096	0.00029	0	0	0	0	0	0	0	0	0	0	0	0	0	0	0	0	0	0	0	0	0	0	0	0	0	0	0	0.00091	0.0012	0	0
Trimethylamine N-oxide	0.00049	0.00061	0	0.00076	0	0	0	0.00035	0.00028	0	0	0	0.00049	0.0038	0.00096	0.0012	0.00014	0.00029	0.00048	0.00043	0	0.00033	0	0	0.00023	0.00036	0.00034	0	0.00041	0	0.00071	0.00031	0.0089	0.0027	0.0093	0.0019	0.0053	0.0029	0.0036	0.0019	0.00042	0.0007	0.00032	0.00052	0.0021	0.0019	0.00052	0	0
Putrescine(1,4-Butanediamine)	0.013	0.013	0.0093	0.0075	0.005	0.0096	0.0068	0.005	0.027	0.033	0.0059	0.018	0.0048	0	0.0013	0.0032	0.0044	0	0.0015	0	0.015	0.01	0.0096	0.022	0.0045	0.005	0.0035	0.0053	0.0095	0.0077	0.009	0.013	0.0058	0.0024	0.0035	0.0024	0	0.0028	0	0	0.022	0.029	0.011	0.012	0.0076	0.012	0.0077	0.0063	0.0088
Sarcosine	0	0.0022	0	0	0	0.0029	0	0	0.0011	0.0014	0.0011	0	0.015	0.0035	0.0046	0.0021	0.028	0.0081	0.069	0.0095	0.0017	0.00085	0	0	0.0013	0	0.001	0	0.0012	0	0	0.00089	0	0.0025	0	0.0021	0.0026	0.0088	0.0074	0.016	0.0021	0	0	0	0.0013	0.0017	0	0	0
beta-Ala	0.019	0.02	0.016	0.015	0.016	0.012	0.02	0.011	0.021	0.017	0.017	0.023	0.19	0.026	0.036	0.0042	0.071	0.091	0.1	0.022	0.022	0.017	0.018	0.028	0.0099	0.025	0.021	0.032	0.022	0.015	0.034	0.026	0.082	0.038	0.076	0.06	0.087	0.1	0.37	0.13	0.02	0.012	0.016	0.022	0.011	0.011	0.017	0.0087	0.018
Ala	1.3	1.1	0.37	0.57	1.5	1.2	1.4	1.3	1.3	1.1	0.7	1.2	2.4	0.62	1.1	1.7	1.2	0.88	1.8	1.1	0.3	0.32	0.28	0.3	0.19	0.39	0.43	0.6	0.22	0.18	0.33	0.38	0.94	0.48	0.82	0.58	0.26	0.36	0.69	0.85	0.45	0.52	0.31	0.49	0.37	0.53	0.57	0.32	0.68
4-Hydroxymethylimidazole	0.0042	0	0	0	0	0	0	0	0	0	0	0	0	0	0	0	0	0	0	0	0	0	0	0	0	0	0	0	0	0	0	0	0	0	0	0	0	0	0	0	0	0	0	0	0	0	0	0	0
Cyclohexylamine	0	0	0	0	0	0	0.0029	0.0033	0.003	0.0025	0.0025	0.0047	0.0036	0	0	0.0031	0.0028	0	0	0.003	0.0048	0.003	0.005	0.0037	0.0026	0.0035	0.0031	0.0036	0.0033	0.013	0.004	0.0017	0.0017	0.0016	0.0016	0.0013	0.0014	0.00099	0.0023	0.0018	0.0018	0.0019	0.0016	0.0014	0.0013	0.0019	0.0025	0.0011	0.0021
Azetidine-2-carboxylate	0	0	0	0	0	0	0	0	0	0	0	0	0	0	0	0	0	0	0	0	0	0	0	0	0	0	0	0	0	0	0	0	0.0035	0	0.0014	0.00093	0	0	0	0.0012	0	0	0	0	0	0	0	0	0
Spermine	0	0	0	0	0	0.00087	0.0005	0	0.00039	0	0	0	0	0	0	0.0011	0.0019	0	0	0	0	0	0	0	0	0	0	0	0	0	0	0.00065	0.0015	0.0024	0.0014	0	0	0	0	0	0	0	0	0	0	0	0	0	0.0057
Cadaverine	0	0.002	0	0	0	0	0.0049	0	0.049	0.0092	0	0	0	0	0	0	0	0	0	0	0	0	0	0	0	0	0	0	0	0	0	0	0	0	0	0	0	0	0	0	0.00055	0.00055	0	0	0.00044	0.001	0	0	0.00036
N,N-Dimethylglycine	0	0	0	0	0	0.0023	0.0017	0	0	0	0.0014	0	0.0049	0.0037	0.0082	0	0.007	0.0025	0.0035	0.0061	0	0	0	0	0	0	0	0	0	0	0	0.0018	0.0035	0.0025	0.0051	0.0029	0.0026	0.0033	0.0036	0.02	0	0	0	0	0	0	0	0	0
2AB	0.026	0.015	0.02	0.016	0.011	0.041	0.013	0.014	0.024	0.019	0.02	0.025	0.021	0.02	0.012	0.022	0.081	0.023	0.025	0.092	0.0043	0.0054	0.0031	0.0044	0.0041	0.004	0.0061	0.0071	0.0042	0.0061	0.0054	0.0055	0.015	0.0073	0.008	0.01	0.0039	0.0052	0.0045	0.007	0.0087	0.017	0.0044	0.0028	0.014	0.014	0.0052	0.0074	0.04
GABA	1.3	0.89	1.2	0.91	1.1	0.72	0.81	0.88	1.1	1.2	0.67	0.94	0.29	0.031	0.025	0.082	0.079	0.0034	0.0038	0.0052	1.3	1.3	1	1.5	0.52	1.2	1.1	1.5	1.1	0.59	1.6	1.3	0.077	0.031	0.051	0.066	0.007	0.0037	0.0043	0.0064	1.1	0.35	0.89	1.4	0.78	1.3	1.5	0.64	1.4
Choline	0.32	0.15	0.2	0.14	0.42	0.17	0.22	0.26	0.27	0.23	0.14	0.18	0.65	0.21	0.11	0.052	0.43	0.079	0.077	0.089	0.078	0.086	0.087	0.072	0.097	0.19	0.18	0.22	0.075	0.065	0.13	0.095	0.17	0.079	0.15	0.13	0.013	0.017	0.019	0.017	0.15	0.073	0.1	0.14	0.092	0.14	0.15	0.038	0.087
Ser	0.79	0.55	0.25	0.26	1.2	0.77	0.86	1.2	1	0.7	0.59	1	0.66	0.14	0.15	0.3	0.62	0.17	0.22	0.28	0.29	0.3	0.31	0.36	0.2	0.32	0.34	0.31	0.25	0.15	0.32	0.46	0.52	0.34	0.6	0.31	0.069	0.12	0.28	0.32	0.22	0.41	0.24	0.29	0.21	0.21	0.3	0.15	0.33
Diethanolamine	0.011	0.0072	0	0.0056	0.0064	0.0044	0.0054	0.0059	0.0068	0.0056	0.005	0.0063	0.006	0.0045	0.0025	0.0037	0.0043	0.0034	0.0039	0.0032	0	0.0056	0.0073	0	0.0032	0	0.0068	0	0	0.0096	0	0.0069	0.0052	0.0048	0.0032	0.0043	0.0054	0.0038	0.0062	0.0054	0	0.0042	0	0	0	0	0	0	0
Hypotaurine	0.0037	0.0047	0.0069	0.0056	0.012	0.012	0.0072	0.0093	0.0077	0.0085	0.016	0.0076	0.049	0.04	0.056	0.0098	0.057	0.025	0.028	0.017	0.032	0.019	0.019	0.0064	0.0077	0.012	0.013	0.025	0.012	0.011	0.01	0.02	0.17	0.11	0.22	0.19	0.042	0.068	0.21	0.23	0.019	0.008	0.01	0.014	0.0075	0.015	0.022	0.0088	0.018
Cytosine	0.00093	0	0	0	0	0	0	0	0	0	0	0	0.00074	0.0011	0	0	0	0.00037	0.00042	0.00085	0	0	0	0	0	0	0	0	0	0	0	0	0	0	0	0	0	0	0	0	0	0	0	0	0	0	0	0	0
Histamine	0	0.00037	0.00022	0	0	0	0.00048	0	0.0013	0.00026	0.00038	0.00047	0	0.0088	0.006	0.001	0.0012	0.0017	0.001	0.0028	0	0.00016	0	0	0	0	0	0	0	0	0	0.00022	0.00055	0.00042	0.0024	0.001	0.00046	0.0011	0.0022	0	0	0.00036	0.00025	0	0.00041	0.00034	0	0	0.00022
Uracil	0.084	0.058	0.044	0	0.077	0.064	0.079	0.08	0.093	0.1	0.046	0.084	0.1	0.051	0	0	0	0	0	0	0	0	0	0	0	0	0	0	0	0	0	0	0.15	0.051	0.11	0.08	0	0	0	0	0.053	0	0	0.072	0.058	0.086	0.09	0	0.066
Carnosine	0.0012	0.0038	0.0012	0.00032	0.0007	0.002	0.0022	0.00096	0.0032	0.0027	0.0049	0.0025	0.0025	0.0017	0.00026	0.00064	0.5	0.96	2.2	2.3	0.007	0.0029	0.003	0.0016	0.0018	0.0026	0.0025	0.0064	0.0011	0.0022	0.003	0.00078	0.0025	0.0049	0.0079	0.0024	3.8	3.8	7.1	5.3	0.015	0.018	0.0071	0.0039	0.0047	0.006	0.015	0.0086	0.0051
Creatinine	0.13	0.1	0.054	0.067	0.089	0.17	0.13	0.11	0.13	0.096	0.066	0.11	0.088	0.19	0.022	0.056	0.11	0.079	0.16	0.29	0.086	0.081	0.084	0.063	0.049	0.099	0.09	0.14	0.049	0.038	0.056	0.039	0.17	0.06	0.077	0.066	0.16	0.1	0.19	0.14	0.07	0.13	0.066	0.074	0.075	0.19	0.094	0.042	0.059
Pro	0.34	0.26	0.064	0.11	0.57	0.39	0.49	0.61	0.47	0.43	0.19	0.45	0.74	0.19	0.14	0.16	1	0.26	0.36	0.31	0.042	0.046	0.032	0.034	0.024	0.049	0.052	0.056	0.026	0.029	0.041	0.041	0.29	0.15	0.27	0.14	0.11	0.11	0.22	0.26	0.055	0.037	0.036	0.055	0.039	0.071	0.094	0.029	0.091
Guanidinoacetate	0.0045	0.0078	0.0021	0.0019	0.0043	0.0025	0.0035	0.0036	0.0082	0.0047	0.0037	0.0032	0.14	0.021	0.02	0.0033	0.013	0.0032	0.0058	0.0046	0.0031	0.003	0.0044	0.0037	0.0022	0.0048	0.0037	0.0047	0.004	0.0088	0.0069	0.005	0.13	0.032	0.045	0.041	0.005	0.0024	0.0028	0.0033	0.0035	0.0033	0.0024	0.0023	0.004	0.003	0.0026	0.0018	0.0022
Val	0.34	0.31	0.069	0.11	0.58	0.42	0.47	0.54	0.47	0.42	0.22	0.47	0.64	0.14	0.11	0.16	0.39	0.13	0.089	0.13	0.052	0.036	0.036	0.036	0.023	0.031	0.041	0.051	0.034	0.025	0.04	0.041	0.24	0.16	0.22	0.17	0.04	0.11	0.12	0.095	0.066	0.065	0.045	0.062	0.05	0.11	0.11	0.036	0.14
Betaine	0.067	0.053	0.053	0.03	0.055	0.022	0.05	0.041	0.057	0.042	0.057	0.062	0.26	0.12	0.31	0.04	0.043	0.072	0.28	0.098	0.015	0.0099	0.0089	0.013	0.0076	0.019	0.017	0.017	0.014	0.029	0.02	0.019	0.24	0.068	0.2	0.1	0.11	0.09	0.15	0.32	0.038	0.042	0.06	0.04	0.018	0.02	0.025	0.0099	0.064
5-Aminovalerate	0	0	0	0	0	0	0.0019	0	0.036	0.022	0	0	0	0	0.0066	0	0	0	0	0	0	0	0	0	0	0	0	0	0	0	0	0	0.02	0.0065	0.0057	0.016	0	0	0	0	0	0	0	0	0	0.0045	0	0	0
Thr	0.36	0.34	0.14	0.13	0.74	0.46	0.66	0.7	0.63	0.49	0.29	0.53	0.55	0.087	0.15	0.1	0.7	0.11	0.13	0.17	0.12	0.11	0.092	0.12	0.075	0.061	0.088	0.091	0.1	0.041	0.074	0.084	0.25	0.13	0.22	0.14	0.046	0.09	0.12	0.11	0.14	0.15	0.074	0.15	0.031	0.074	0.16	0.039	0.13
Alpha-Methylserine	0	0	0	0	0	0	0	0	0	0	0	0	0	0	0	0	0	0	0	0	0	0	0	0	0	0	0	0	0	0	0	0	0	0	0	0	0	0	0	0	0	0	0.0022	0	0.0014	0	0	0.00097	0.0015
Homoserine	0	0	0	0	0	0	0	0	0	0	0	0	0	0	0	0.0014	0	0	0.0007	0	0	0	0	0	0	0	0	0	0	0	0	0	0	0	0	0	0	0	0	0	0	0	0	0	0	0.0015	0	0	0
Cys	0	0	0	0	0	0.0083	0.018	0.012	0.009	0.022	0.0061	0.017	0	0	0	0	0	0	0	0	0	0	0	0	0	0	0	0	0	0	0	0.0021	0.021	0.0039	0.012	0.0085	0	0	0	0	0.002	0.0022	0.0018	0.0063	0.0018	0.0039	0.0051	0.0013	0
Nicotinamide	0.045	0.032	0.053	0.021	0.031	0.041	0.036	0.042	0.035	0.039	0.041	0.048	0.061	0.025	0.011	0.0079	0.054	0.033	0.032	0.06	0.0073	0.012	0.015	0.015	0.0059	0.012	0.0082	0.013	0.012	0.0079	0.012	0.0058	0.014	0.0068	0.019	0.036	0.0056	0.0052	0.0065	0.0069	0.039	0.049	0.016	0.021	0.03	0.036	0.044	0.017	0.049
Taurine	0.76	0.91	0.76	0.58	1.2	1.1	1.3	0.95	0.46	0.45	0.43	0.68	1.1	2.1	2	0.29	2.6	1.2	1.8	0.98	0.48	0.63	0.49	0.43	0.36	0.66	0.56	0.74	0.26	0.32	0.58	0.42	4.5	2	2.5	2.5	0.67	0.64	3	2.2	0.53	0.65	0.42	0.63	0.38	0.87	0.89	0.35	0.58
1-Methylhistamine	0	0	0.00024	0	0	0	0	0	0.00043	0.00022	0	0	0	0	0.00024	0	0	0	0	0	0.00024	0	0	0	0	0	0	0	0	0	0	0	0	0	0	0	0	0	0	0	0	0	0	0	0	0	0	0	0
Melamine	0.002	0	0	0	0	0	0	0	0	0	0	0	0	0	0	0	0	0	0	0	0	0	0	0	0	0	0	0	0	0	0	0	0	0	0	0	0	0	0	0	0	0	0	0	0	0	0	0	0
Pipecolate	0.0011	0.00081	0.00046	0.00053	0.00041	0.025	0.00075	0.00053	0.00036	0	0.00058	0.00057	0.0021	0.00059	0.0012	0.00089	0.012	0.0012	0.0051	0.0013	0.00041	0.00042	0	0.00022	0	0.00035	0.00044	0.00053	0	0	0	0	0.0032	0.00098	0.0028	0.0013	0.00073	0.00045	0.0011	0.00099	0	0.00055	0.0002	0	0.00044	0	0	0.00035	0
N-Acetylputrescine	0.00094	0.00097	0.00046	0.00042	0	0.00064	0.00034	0	0.00059	0.00061	0	0	0.00055	0.0018	0	0	0	0	0	0.00071	0	0	0	0	0	0	0	0	0	0	0	0	0	0	0	0	0	0	0	0	0.00076	0.0011	0.00028	0.00054	0.00052	0.00087	0	0	0
Agmatine	0	0	0	0	0	0	0	0	0.0096	0.0012	0	0	0	0	0	0	0	0	0	0	0	0	0	0	0	0	0	0	0	0	0	0	0	0	0	0	0	0	0	0	0	0	0	0	0	0	0	0	0
Hydroxyproline	0.013	0.017	0.0039	0.0067	0.0078	0.012	0.02	0.0098	0.022	0.017	0.0044	0.0096	0.037	0.038	0.011	0.0091	0.18	0.023	0.051	0.016	0.006	0.0051	0.0045	0.0051	0.0041	0.0065	0.0058	0.0066	0.0027	0.0036	0.0047	0.005	0.03	0.012	0.048	0.021	0	0.0056	0	0.014	0.0068	0.013	0.013	0.012	0.024	0.021	0.013	0.0091	0.0097
Creatine	4.7	3.9	3.7	3.1	4.5	4.8	5.4	4.8	4	3.5	3.1	4.2	0.84	0.24	0.37	2.8	9.7	5.9	8	11.7	5	5.2	5.3	4.2	3.4	7	6.3	8.8	3.3	2.2	5.7	4.3	1.8	0.47	1.5	0.6	4.7	4.3	11.3	11.6	4.3	5.8	4.6	4.8	5.3	6.5	5.8	4.1	4.9
Ile	0.17	0.17	0.033	0.054	0.34	0.23	0.26	0.31	0.25	0.24	0.13	0.28	0.37	0.064	0.046	0.057	0.16	0.037	0.019	0.045	0.022	0.017	0.017	0.017	0.011	0.016	0.02	0.024	0.015	0.014	0.02	0.018	0.1	0.065	0.1	0.086	0.016	0.044	0.054	0.042	0.031	0.03	0.02	0.032	0.032	0.057	0.054	0.013	0.064
Leu	0.37	0.35	0.067	0.11	0.69	0.51	0.59	0.65	0.51	0.48	0.29	0.61	0.83	0.12	0.096	0.13	0.37	0.072	0.041	0.059	0.038	0.034	0.034	0.031	0.021	0.031	0.038	0.048	0.028	0.024	0.041	0.034	0.21	0.13	0.18	0.17	0.027	0.071	0.088	0.064	0.07	0.061	0.049	0.061	0.056	0.12	0.11	0.029	0.13
Asn	0.096	0.11	0.028	0.036	0.19	0.15	0.19	0.21	0.12	0.13	0.071	0.18	0.21	0.037	0.062	0.11	0.31	0.06	0.078	0.071	0.041	0.041	0.054	0.051	0.024	0.05	0.047	0.064	0.033	0.024	0.048	0.053	0.092	0.071	0.095	0.053	0.028	0.033	0.087	0.079	0.04	0.025	0.032	0.04	0.078	0.061	0.077	0.053	0.046
Gly-Gly	0.0047	0.0069	0.0022	0.0025	0.0047	0.0061	0.0069	0.0058	0.0042	0.0038	0.0035	0.009	0.0031	0.0013	0	0.0015	0.0017	0	0	0.0017	0	0	0	0.0016	0	0	0	0	0.0011	0	0	0	0.0013	0.0019	0.0018	0.0016	0	0	0.0016	0.0015	0.0016	0	0	0.0012	0	0.0013	0	0.00073	0.0021
Ornithine	0.023	0.054	0.011	0.012	0.085	0.056	0.087	0.049	0.096	0.07	0.035	0.046	0.2	0.0087	0.017	0.02	0.17	0.027	0.026	0.058	0.0062	0.0046	0.0036	0.0048	0.0024	0.0058	0.0046	0.0053	0.0032	0.0048	0.0064	0.0074	0.049	0.035	0.075	0.027	0.017	0.0096	0.023	0.051	0.022	0.016	0.0069	0.012	0.012	0.021	0.015	0.0061	0.032
Asp	1.2	1	1.1	0.84	2.3	1.3	1.8	2.3	3	3.5	1.8	3	0.55	0.28	0.46	0.38	0.25	0.07	0.25	0.15	1.4	1.1	1	1.7	0.52	1.4	1.4	1.5	1.3	0.37	1.8	2.2	0.76	0.35	0.81	0.47	0.03	0.062	0.072	0.1	0.71	0.56	0.67	1.2	0.74	0.71	0.96	0.42	0.68
Adenine	0.00089	0.0026	0.0025	0.0016	0	0.0028	0.0026	0.0018	0	0	0	0	0	0.0055	0.0019	0.0025	0.0023	0.0016	0.0045	0.0023	0.0038	0.0038	0.0037	0.003	0.0026	0.0067	0.0047	0.0055	0.0021	0	0.0052	0.0028	0.0041	0	0.0015	0.0032	0	0.0014	0	0	0.0052	0.0061	0.0052	0.0064	0.011	0.0091	0.0092	0.0044	0.0038
Hypoxanthine	1	0.69	0.56	0.49	0.79	0.74	0.67	0.8	0.87	0.86	0.64	0.76	0.39	0.21	0.15	0.09	0.42	0.16	0.056	0.066	0.21	0.2	0.21	0.17	0.14	0.26	0.23	0.39	0.12	0.08	0.27	0.15	0.44	0.19	0.32	0.33	0.0049	0.0097	0.0049	0.0045	0.45	0.33	0.17	0.59	0.3	0.61	0.57	0.12	0.45
1-Methylnicotinamide	0.0024	0.0025	0.0016	0.0014	0.0016	0.0029	0.0025	0.0009	0.0026	0.0015	0.0023	0.0046	0.022	0.015	0.014	0.0017	0.011	0.0018	0.0027	0.0019	0	0	0	0	0	0	0	0	0	0	0	0	0	0	0	0	0	0	0	0	0.0031	0.0048	0.0015	0.0034	0	0.00079	0	0	0.0036
Trigonelline	0	0	0	0	0	0	0	0.00032	0	0	0	0	0.00094	0.00089	0	0	0	0.00046	0.00082	0.00089	0	0	0	0	0	0	0	0	0	0	0	0	0.006	0.00052	0.0041	0.00044	0.00086	0	0	0	0	0	0	0	0	0	0	0	0
Tyramine	0	0	0	0	0	0	0	0	0.013	0.0019	0	0	0	0	0	0	0	0	0	0	0	0	0	0	0	0	0	0	0	0	0	0	0	0	0	0	0	0	0	0	0	0	0	0	0	0	0	0	0
Urocanate	0	0	0	0	0	0	0	0	0	0	0	0	0	0	0	0	0.0023	0	0	0.0033	0	0	0	0	0	0	0	0	0	0.012	0	0.0088	0	0.0055	0.0054	0.0039	0.0057	0.013	0.015	0.0072	0	0	0	0	0	0	0	0	0
Tropinone	0	0.0011	0	0.00056	0.00052	0	0	0	0	0	0	0	0	0	0	0	0	0	0	0	0	0	0	0	0	0	0	0	0	0	0	0	0	0	0	0	0	0	0	0	0	0	0	0	0	0	0	0	0
Tropine	0.00076	0	0	0	0	0	0	0	0	0	0	0	0	0	0	0	0	0	0	0	0	0	0.0001	0.00012	8.7e-05	0	0	0	0.00019	0	0	0.00026	0.00019	0	0.00022	0.00018	0	0	0	0.00027	0	0.00031	0	0	0.00021	0.0002	0.00034	0	0
gamma-Guanidinobutyrate	0.0027	0.0018	0.0015	0.0012	0.0022	0.00067	0.0014	0.0018	0.0033	0.0023	0.0016	0.0019	0.0021	0	0.00042	0	0.00047	0	0	0.00052	0.0043	0.0019	0.0021	0.003	0.00097	0.0016	0.00096	0.0016	0.002	0.0023	0.0032	0.0033	0.0018	0.0014	0.0013	0	0.00053	0	0	0	0.002	0.0044	0.0014	0.0022	0.0027	0.0053	0.0066	0.0014	0.0019
gamma-Butyrobetaine	0.0028	0.0028	0.0023	0.0013	0.0022	0.0028	0.0026	0.0021	0.0036	0.0028	0.0022	0.0028	0.007	0.0055	0.0038	0.0039	0.014	0.0024	0.1	0.045	0.004	0.0024	0.002	0.0034	0.002	0.0031	0.0033	0.0038	0.0021	0.0019	0.0041	0.0034	0.047	0.024	0.047	0.021	0.081	0.061	0.16	0.16	0.0067	0.0062	0.0038	0.004	0.0042	0.0086	0.0054	0.0021	0.0062
Acetylcholine	0.00086	0.00056	0.00025	0.00041	0.00039	0.00019	0.00016	0	0.00023	0.00013	0.00023	0.00022	0.00018	0.00023	0.00019	0	0.0024	0.00012	0	0	0.00081	0.00076	0.00077	0.0012	0.00017	0.00029	0.00019	0.0002	0.0009	0.001	0.00071	0.001	0	0.00014	0	0	0	0.0002	0	0	0.00026	0.0003	0.00055	0.00017	0	0	0	0.00011	0.00016
Spermidine	0.003	0.015	0.0034	0.0016	0.0036	0.011	0.007	0.0051	0.011	0.016	0.0076	0.018	0.00074	0.0026	0.0023	0.002	0.0037	0.0007	0.00085	0.0016	0.014	0.0072	0.016	0.0099	0.0079	0.0025	0.0021	0.0042	0.0055	0.00084	0.0061	0.0089	0.006	0.0046	0.0037	0.0013	0.00069	0.0026	0.0011	0.00069	0.013	0.063	0.01	0.011	0.011	0.0084	0.0065	0.0041	0.041
Gln	2.7	2.4	2.1	1.7	2.5	1.6	2.9	2.4	2	2.1	1.7	1.5	0.43	0.32	0.62	1.1	4.4	2.7	5.8	4.1	2.7	2.5	3.2	2.2	1.9	4.7	3.9	5.7	1.9	1	3	2.5	0.56	0.47	0.63	0.49	0.48	0.61	2	2.9	5.6	4.4	5.4	2.9	6.6	8.1	3.7	4.2	3.2
Lys	0.26	0.32	0.072	0.11	0.6	0.44	0.52	0.61	0.38	0.45	0.23	0.53	0.54	0.056	0.1	0.13	0.84	0.17	0.18	0.58	0.06	0.064	0.056	0.062	0.046	0.084	0.055	0.096	0.043	0.028	0.062	0.061	0.21	0.15	0.19	0.15	0.069	0.074	0.099	0.19	0.15	0.27	0.12	0.15	0.16	0.24	0.15	0.07	0.21
Glu	5.7	5.2	5.1	3.8	5.3	4.9	5.7	6.3	6.5	4.6	3.2	6.8	3	1.8	3	1.9	1	0.24	0.25	0.3	5.4	6.8	6.6	4.4	3.2	6.5	6.4	8	3.5	2	5.1	5.1	5.7	2.5	5.1	3.6	0.21	0.39	0.74	0.89	6.5	4.9	5.1	5.5	5.4	5.6	5.5	3.5	5.2
Met	0.11	0.076	0.018	0.029	0.27	0.17	0.19	0.22	0.18	0.17	0.094	0.19	0.17	0.021	0.018	0.028	0.088	0.021	0.012	0.012	0.014	0.015	0.012	0.0089	0.0086	0.017	0.021	0.02	0.0093	0.0062	0.016	0.012	0.066	0.033	0.066	0.037	0.018	0.023	0.028	0.023	0.03	0.0089	0.0072	0.018	0.016	0.032	0.042	0.01	0.027
Guanine	0	0	0	0	0.0023	0.0077	0.0043	0.0053	0	0.00066	0.00084	0	0.0012	0	0	0.0014	0	0	0	0	0.0024	0.00099	0.002	0.0015	0.008	0.02	0.016	0.023	0.0022	0.0018	0.004	0.0039	0.0018	0.0018	0.0025	0.0026	0	0.00074	0	0	0	0	0	0.00056	0.027	0.07	0.054	0.011	0.0016
Xanthine	0.12	0.1	0.06	0.056	0.1	0.09	0.11	0.11	0.15	0.14	0.093	0.12	0.32	0	0.021	0	0	0	0	0	0	0	0	0	0	0	0	0	0	0	0	0	0.053	0	0.032	0.028	0	0	0	0	0.047	0.04	0	0.06	0	0	0	0	0.061
Pseudopelletierine	0.00055	0.00052	0	0.00028	0	0	0	0	0	0	0	0	0	0	0	0	0	0	0	0	0	0	0	0	0	0	0	0	0	0	0	0	0	0	0	0	0	0	0	0	0	0	0	0	0	0	0	0	0
His	0.11	0.094	0.04	0.034	0.21	0.13	0.17	0.21	0.19	0.18	0.079	0.17	0.25	0.036	0.032	0.071	0.2	0.12	0.21	0.078	0.026	0.026	0.029	0.023	0.015	0.03	0.025	0.042	0.015	0.0094	0.029	0.022	0.16	0.072	0.13	0.079	0.022	0.048	0.067	0.059	0.077	0.037	0.039	0.045	0.032	0.046	0.061	0.038	0.042
N-Acetylvaline	0	0	0	0	0	0	0	0	0	0	0	0	0.0016	0	0	0	0	0	0	0	0	0	0	0	0	0	0	0	0	0	0	0	0.0019	0.0011	0	0	0.00086	0	0	0	0	0	0	0	0	0	0	0	0
Ala-Ala	0	0.0012	0.0004	0.00077	0	0.00053	0.00056	0	0.00086	0.00072	0	0.0019	0	0	0.00064	0	0	0	0	0	0	0	0	0	0	0	0	0	0	0	0	0	0.0015	0.00064	0.00058	0.0011	0	0	0	0	0	0	0	0	0	0	0	0	0.00043
Tryptamine	0	0	0	0	0	0	0	0	0	0	0	0	0	0	0	0	0	0	0	0	0	0	0	0	0	0	0	0	0	0	0	0	0	0	0	0	0	0	0	0	0	0	0	0	0	0	0	0	0
alpha-Aminoadipate	0.0057	0.005	0.0045	0.0049	0.0068	0.014	0.014	0.0088	0.0057	0.005	0.0025	0.0067	0.013	0.017	0.034	0.004	0.012	0.016	0.017	0.02	0.0096	0.0082	0.0073	0.0055	0.0082	0.01	0.012	0.019	0.0061	0.004	0.0087	0.01	0.064	0.017	0.036	0.1	0.0018	0.0055	0.0023	0.021	0.009	0.0098	0.0051	0.0045	0.0092	0.0086	0.017	0.012	0.0079
Carnitine	0.013	0.026	0.012	0.0082	0.027	0.027	0.043	0.024	0.029	0.018	0.022	0.032	0.21	0.052	0.085	0.06	0.13	0.14	1.5	1.1	0.027	0.019	0.017	0.022	0.014	0.018	0.02	0.028	0.015	0.012	0.018	0.015	0.33	0.12	0.4	0.19	0.48	0.56	1.3	1	0.021	0.016	0.018	0.028	0.016	0.029	0.035	0.012	0.017
5-Hydroxylysine	0	0	0	0	0	0	0	0	0	0	0	0	0.0023	0	0	0	0	0	0	0	0.00042	0	0	0	0	0	0	0	0	0	0	0.00058	0.0028	0.0016	0.0033	0.0023	0	0.00042	0.00083	0.0017	0	0	0	0	0	0	0	0	0
Nicotine	0	0	0	0	0	0	0	0	0	0	0	0	0	0	0	0	0	0	0	0	0	0	0	0	0.00029	0	0	0	0	0.0012	0.0013	0.0005	0.00052	0.00029	0.00039	0.00053	0.00034	0.00022	0	0	0.0003	0	0.00025	0.00024	0.00032	0	0.00062	0.00026	0.00049
Methionine sulfoxide	0.0041	0.005	0	0	0.0071	0.0053	0.0056	0.0067	0.0058	0.0053	0.0037	0.0094	0.0094	0	0.0012	0.0018	0.0037	0.0032	0.0026	0.0015	0.0014	0.0023	0	0.0013	0	0	0.002	0.0018	0.0011	0	0	0.0021	0.0072	0.0046	0.0079	0.0028	0.0022	0.0021	0.0032	0	0.0026	0	0	0	0	0	0.0021	0	0
7-Methylguanine	0	0	0	0	0.00039	0	0	0	0	0	0	0	0.00086	0	0	0	0.00037	0	0	0	0	0	0	0	0	0	0	0	0	0	0	0	0	0	0	0	0	0	0	0	0	0	0	0	0	0.0004	0.00053	0	0
Phe	0.13	0.14	0.032	0.045	0.27	0.2	0.21	0.24	0.18	0.18	0.12	0.25	0.34	0.048	0.038	0.052	0.1	0.035	0.022	0.017	0.019	0.017	0.017	0.018	0.014	0.023	0.025	0.031	0.012	0.013	0.026	0.021	0.089	0.06	0.081	0.067	0.013	0.026	0.043	0.032	0.055	0.06	0.038	0.032	0.074	0.064	0.058	0.069	0.061
Pyridoxal	0	0.0014	0.0019	0	0	0.0015	0	0.0015	0	0	0	0	0	0	0	0	0	0	0	0	0.0024	0.0022	0	0.0025	0	0	0	0	0.0015	0	0	0.0022	0	0	0	0	0	0	0	0	0.0016	0.002	0	0.0028	0	0	0	0	0
Pyridoxamine	0.00059	0.00067	0	0	0.00053	0.00053	0.00071	0.00058	0.0012	0.00066	0.00043	0.0014	0.0022	0	0	0	0	0	0	0	0	0	0	0	0	0	0	0	0	0	0	0	0	0	0	0	0	0	0	0	0	0	0	0	0	0.00034	0	0	0.00049
Pyridoxine	0	0.00035	0.0003	0	0.00023	0.00022	0.00028	0.00025	0.00053	0.00034	0	0.00032	0.00058	0	0	0	0	0	0	0	0	0	0	0	0	0	0	0	0	0	0	0	0	0	0	0	0	0	0	0	0	0	0	0	0	0	0	0	0
3-Methylhistidine	0.0012	0.0054	0.001	0.011	0.00095	0.0045	0.0062	0.0013	0.0033	0.0028	0.00061	0.002	0.0055	0.0038	0.0019	0.0013	0.0026	0.0025	0.0041	0.003	0.0073	0.0059	0.0059	0.011	0.0062	0.01	0.011	0.019	0.0085	0.0025	0.011	0.0094	0.18	0.054	0.16	0.094	0.0066	0.022	0.015	0.017	0.034	0.02	0.03	0.011	0.028	0.025	0.017	0.025	0.0089
N-Acetylornithine	0	0.0017	0	0	0	0.0015	0.0014	0	0	0	0	0.0051	0.0015	0	0.0007	0.00069	0.0013	0	0	0	0	0	0	0	0	0	0	0	0	0	0	0	0	0	0	0	0	0	0	0	0	0	0	0	0	0	0	0	0
Arg	0.18	0.15	0.055	0.075	0.42	0.3	0.31	0.44	0.21	0.23	0.17	0.35	0.061	0.034	0.049	0.056	0.13	0.11	0.079	0.29	0.04	0.037	0.044	0.026	0.018	0.036	0.03	0.037	0.024	0.016	0.035	0.033	0.11	0.086	0.1	0.067	0.03	0.033	0.051	0.084	0.049	0.074	0.035	0.076	0.057	0.1	0.096	0.033	0.06
Guanidinosuccinate	0	0	0	0	0	0	0	0	0	0	0	0	0.0052	0.0012	0	0	0	0	0	0	0	0	0	0	0	0	0	0	0	0	0	0	0.0022	0	0.0013	0	0.00057	0	0	0	0	0	0	0	0	0	0	0	0
Indole-3-acetate	0	0	0	0	0	0	0	0	0	0	0	0	0	0	0	0	0	0	0	0	0	0	0	0	0	0	0	0	0	0	0	0	0.0044	0	0.0041	0	0	0	0	0	0	0	0	0	0	0	0	0	0
Citrulline	0.071	0.036	0.0058	0.019	0.11	0.026	0.056	0.1	0.13	0.12	0.028	0.089	0.024	0.0078	0.012	0.012	0.063	0.064	0.11	0.056	0.022	0.012	0.0085	0.023	0.0036	0.0055	0.0053	0.006	0.011	0.0075	0.023	0.02	0.013	0.02	0.014	0.0072	0.02	0.026	0.042	0.049	0.0079	0.01	0.0051	0.0077	0.0049	0.011	0.011	0.0054	0.0059
Alliin	0	0	0	0	0	0	0	0.0023	0	0	0	0	0.0052	0	0	0	0.0032	0	0.0045	0	0	0	0	0	0	0	0	0	0	0	0	0	0	0	0	0	0	0	0	0	0	0	0	0	0	0	0	0	0
Glucosamine	0	0	0	0	0	0	0	0	0	0	0	0.0013	0.0026	0	0	0.00055	0.00048	0	0	0	0	0	0	0	0	0	0	0	0	0	0	0	0	0	0	0	0	0	0	0	0	0	0	0	0	0	0	0	0
Tyr	0.18	0.14	0.038	0.052	0.3	0.21	0.25	0.29	0.2	0.2	0.13	0.26	0.35	0.048	0.041	0.075	0.1	0.037	0.022	0.019	0.017	0.019	0.02	0.019	0.015	0.033	0.039	0.033	0.016	0.014	0.03	0.032	0.11	0.061	0.1	0.072	0.015	0.03	0.049	0.046	0.094	0.06	0.035	0.04	0.066	0.059	0.075	0.048	0.062
Phosphorylcholine	0.11	0.2	0.16	0.1	0.25	0.21	0.33	0.35	0.2	0.17	0.17	0.23	0.15	0.16	0.55	0.43	0.043	0.012	0.023	0.023	0.086	0.097	0.082	0.046	0.061	0.17	0.18	0.22	0.05	0.033	0.075	0.07	0.42	0.069	0.29	0.13	0.0061	0.011	0.021	0.016	0.15	0.11	0.12	0.09	0.23	0.27	0.21	0.1	0.13
N8-Acetylspermidine	0.00072	0.00083	0.00016	0.00014	0.00032	0.00046	0.00036	0.00038	0.00078	0.00049	0.00065	0.0021	0	0.00023	0	0	0.00033	0	0	0	0	0	0	0	0	0	0	0	0	0	0	0	0	0	0	0	0	0	0	0	0	0.00043	0.00013	0.00012	0.0003	0	0	0.00012	0
N-epsilon-Acetyllysine	0	0.0015	0	0	0.0019	0.0017	0.002	0.0023	0.0015	0.0015	0.00079	0.0015	0.002	0	0	0	0.0024	0.0011	0	0.0016	0	0	0	0	0	0	0	0	0	0	0	0.00061	0.0014	0.0011	0	0.0012	0	0.00079	0	0.0013	0.0017	0.0015	0	0.0018	0.0011	0.0022	0.0015	0.00065	0.0014
Gly-Leu	0	0.0032	0	0	0.0012	0.0016	0.0017	0.0013	0.0013	0.0014	0.0011	0.0043	0.0022	0	0.00076	0	0.0013	0	0	0	0	0	0	0	0	0	0	0	0	0	0	0	0.004	0.0015	0.0029	0.0018	0	0	0	0	0	0	0	0	0	0.00045	0	0	0
N6,N6,N6-Trimethyllysine	0	0	0.00065	0	0	0.001	0	0.00097	0	0.00083	0.00064	0	0	0.00098	0	0.00062	0.003	0.0075	0	0.0091	0.00085	0.00091	0.00092	0.00079	0.00066	0.0015	0.0011	0.0017	0.0011	0	0.0013	0.0011	0.0091	0.0061	0.014	0.0045	0.00094	0.0012	0.0018	0.0035	0.0015	0	0	0	0	0	0	0	0.0017
SAH	0.0037	0.0065	0.0045	0.0036	0.0025	0.011	0.0065	0.005	0.0046	0.0022	0.0039	0.0073	0.0019	0.0024	0.0027	0.0023	0.0047	0.0016	0.0022	0.0019	0.002	0.0024	0.0025	0.0017	0.0012	0.0022	0.0029	0.0028	0.0015	0.001	0.0028	0.0026	0.0053	0.0015	0.0028	0.0022	0.00049	0.00021	0.0004	0.0007	0.0037	0.0049	0.002	0.0038	0.0028	0.0063	0.0047	0.002	0.0054
Tyrosine methyl ester	0	0	0	0	0	0	0	0	0	0	0	0	0	0	0	0	0	0	0	0	0	0	0	0	0	0.0061	0.0062	0.0053	0	0	0	0.0043	0.0064	0.0057	0.0073	0.0058	0	0	0	0	0	0	0	0	0	0	0	0	0
N-Acetylhistidine	0.0015	0.0011	0.0014	0	0.0011	0.00097	0.001	0.0012	0.0013	0	0.0008	0	0.00086	0	0	0.0065	0	0	0	0	0.0012	0.0021	0.0013	0.0023	0.0011	0.0026	0.0013	0.0032	0.00091	0	0	0.00037	0.00048	0	0.0005	0	0	0	0	0	0.0011	0.0023	0.0043	0.0022	0.00061	0.0036	0.0012	0.00075	0.00052
Hydroxyatrazine	0.00052	0.00031	0.00011	0.00014	0	0	0	0	0	0	0	0	0	0	0	0	0	0	0	0	0	0	0	0	0	0	0	0	0	0	0	0	0	0	0	0	0	0	0	0	0	0	0	0	0	0	0	0	0
SAM+	0	0.0014	0.0013	0.0011	0.00091	0.0026	0.0022	0.00083	0.001	0.0007	0.00099	0.0018	0	0.0015	0.0034	0.0092	0.0016	0.00051	0.00047	0.0015	0.0047	0.0044	0.0054	0.0056	0.0036	0.0072	0.0064	0.0076	0.0042	0.0018	0.0043	0.0054	0.0058	0.0027	0.0061	0.0036	0.0017	0.0026	0.0053	0.0057	0.0067	0.024	0.0059	0.0051	0.011	0.0077	0.0058	0.0069	0.0047
o-Acetylcarnitine	0.0095	0.0093	0.0029	0.0051	0.023	0.025	0.03	0.014	0.007	0.0037	0.014	0.0074	0.051	0.096	0.15	0.091	0.1	0.25	0.64	0.31	0.026	0.012	0.015	0.015	0.01	0.014	0.021	0.025	0.017	0.014	0.013	0.018	0.11	0.047	0.21	0.079	0.23	0.18	0.56	0.84	0.013	0.031	0.019	0.011	0.014	0.013	0.018	0.013	0.016
Trp	0.03	0.03	0.01	0.01	0.048	0.037	0.046	0.047	0.035	0.035	0.022	0.051	0.08	0.012	0.011	0.018	0.011	0.0095	0.0054	0.005	0.0052	0.0047	0.0045	0.0062	0.0043	0.0063	0.0075	0.0095	0.0046	0.0037	0.0065	0.0068	0.032	0.022	0.027	0.021	0.0031	0.0075	0.0088	0.0087	0.016	0.02	0.011	0.01	0.012	0.016	0.017	0.01	0.0071
Kynurenine	0	0	0	0	0.00044	0.00082	0.0012	0	0	0	0	0	0.0027	0.0011	0.0021	0.00075	0.0027	0.00075	0	0	0	0	0	0	0	0	0	0	0	0	0	0	0.0015	0.00095	0.0018	0.0013	0	0	0	0	0.001	0	0	0	0.0011	0.0016	0	0.00059	0.0012
Cysteine-glutathione disulphide -Divalent	0.022	0.032	0.0079	0.049	0.093	0.036	0.065	0.092	0.056	0.043	0.031	0.061	0.054	0.013	0.011	0.0055	0.0092	0.0036	0.0011	0.0011	0.0014	0.00083	0.00093	0.004	0.0014	0.0045	0.0017	0.0026	0.0026	0.0081	0.0057	0.0056	0.043	0.023	0.026	0.049	0.0029	0.0064	0.0019	0.0032	0.029	0.0064	0.0056	0.024	0.0063	0.012	0.022	0.0038	0.0055
beta-Ala-Lys	0.0025	0.0071	0.0024	0.0018	0.0033	0.0027	0.0028	0.0024	0.0028	0.0044	0.0036	0.0085	0	0	0	0	0.0029	0.0027	0.0036	0.011	0.0057	0.0037	0.0048	0.0051	0.0034	0.0029	0.0033	0.0043	0.004	0	0.0064	0.0034	0.0032	0.0024	0	0.0039	0.0046	0.0029	0.0022	0.013	0.0032	0.014	0.0025	0.0043	0.002	0.0041	0.0037	0.0015	0.0054
N-Acetylglucosamine	0.019	0.016	0.016	0.012	0.016	0.018	0.018	0.019	0.018	0.012	0.012	0.027	0.14	0.011	0.0044	0.0076	0.007	0.0021	0.0048	0.0041	0.0065	0.0056	0.0059	0.0051	0.0034	0.0072	0.092	0.015	0.0049	0.0082	0.012	0.11	0.045	0.019	0.029	0.025	0.0038	0.0023	0.0036	0.008	0.0083	0.008	0.0057	0.0098	0.0081	0.013	0.011	0.0052	0.014
Cystathionine	0.066	0.11	0.055	0.014	0.041	0.18	0.019	0.02	1.4	0.64	0.39	0.26	0.0084	0	0	0	0.15	0	0	0	0.13	0.094	0.26	0.15	0.1	0.11	0.21	0.18	0.22	0.044	0.18	0.66	0.0035	0.0031	0.0023	0.0016	0.00091	0.0009	0.0025	0.0024	0.067	0.22	0.042	0.072	0.075	0.1	0.043	0.032	0.037
gamma-Glu-2AB	0	0	0	0	0	0	0	0	0	0	0	0	0	0	0	0	0	0	0	0	0	0	0	0	0	0	0	0	0	0	0	0	0	0	0	0	0	0	0	0	0	0	0	0	0	0	0	0	0
Cystine	0.028	0.0031	0.0008	0.0068	0.043	0.004	0.013	0.038	0.034	0.013	0.013	0.015	0.0099	0.0013	0.0015	0	0.00091	0	0	0	0	0	0	0	0	0	0	0	0	0.00093	0	0	0	0	0	0.004	0	0.00052	0	0	0.0018	0	0	0	0	0	0	0	0
Homocarnosine	0.11	0.25	0.15	0.066	0.28	0.18	0.3	0.27	0.16	0.29	0.21	0.2	0.0046	0.0018	0	0	0.023	0.0024	0.0063	0.0095	0.15	0.076	0.11	0.057	0.06	0.069	0.045	0.1	0.025	0.012	0.063	0.023	0.0021	0	0.0011	0.00088	0.037	0.088	0.048	0.058	0.13	0.13	0.11	0.13	0.088	0.35	0.44	0.11	0.12
Anserine	0	0	0	0	0	0	0	0	0	0	0	0	0	0	0	0	0.0021	0.0096	0.033	0.04	0	0	0	0	0	0	0	0	0	0	0	0	0	0	0	0	0.093	0.1	0.18	0.09	0	0	0	0	0	0	0	0	0
Cytidine	0.012	0.01	0.0056	0.0093	0.0027	0.0046	0.0045	0.0028	0.0031	0.0063	0.0015	0.0028	0.0082	0.0034	0.0021	0.0039	0.002	0.00073	0.001	0.001	0.011	0.0099	0.01	0.0097	0.0069	0.011	0.011	0.012	0.0059	0.0037	0.014	0.01	0.028	0.0081	0.012	0.0065	0.0006	0.00078	0.00081	0.0013	0.015	0.013	0.013	0.013	0.013	0.012	0.011	0.0044	0.0067
Uridine	0.089	0.09	0.085	0.057	0.094	0.086	0.098	0.088	0.051	0.081	0.11	0.091	0.058	0.067	0.022	0.024	0.083	0.031	0.027	0.03	0.076	0.085	0.082	0.067	0.053	0.11	0.093	0.14	0.061	0.082	0.12	0.079	0.16	0.11	0.066	0.086	0.027	0.018	0.031	0.035	0.054	0.06	0.073	0.034	0.042	0.031	0.044	0.028	0.052
Pyridoxamine 5'-phosphate	0	0	0.0024	0.0021	0.0018	0.0018	0.0025	0.0024	0.0018	0.0017	0.0017	0.0024	0	0	0	0.0026	0.0015	0	0	0	0.0033	0.0032	0.0028	0.004	0.0017	0.0039	0.0031	0.0043	0.0024	0	0.0053	0.0043	0.0076	0.0026	0.0045	0.003	0	0.00073	0	0	0.0034	0.0026	0.0033	0.004	0.0031	0.0036	0.0028	0.0021	0.0043
gamma-Glu-cys	0	0	0	0	0	0	0	0	0	0	0	0	0	0	0	0.017	0	0	0	0	0.0069	0.0044	0.009	0.0048	0.0057	0.012	0.011	0.0096	0.0067	0	0	0.0076	0.042	0.013	0.027	0.026	0	0	0	0	0.016	0.02	0.0077	0.013	0.016	0.02	0.02	0.0086	0.0076
Glycerophosphorylcholine	0.3	0.59	0.1	0.26	0.16	0.18	0.43	0.24	0.1	0.11	0.067	0.26	0.8	0.17	0.91	0.99	0.044	0.52	1.2	1.3	0.36	0.37	0.46	0.26	0.33	0.45	0.46	0.6	0.16	0.067	0.26	0.25	1.1	0.4	0.77	0.82	0.13	0.09	0.039	0.36	0.22	0.93	0.38	0.37	0.18	0.21	0.38	0.31	0.38
Thiamine	0.11	0.07	0.05	0.057	0.073	0.054	0.1	0.092	0.12	0.073	0.088	0.19	0.14	0	0	0.034	0	0	0	0	0	0.036	0	0	0	0.048	0	0.06	0.057	0	0	0.043	0	0	0	0	0	0	0	0	0.058	0.085	0	0.056	0.039	0.058	0.072	0	0.054
Adenosine	0.00095	0.0014	0.00095	0.0028	0.0003	0.0013	0.00064	0.0006	0.00038	0.0003	0.00029	0.00037	0.0007	0.017	0.0027	0.0098	0.00036	0.00027	0.00098	0.00034	0.013	0.017	0.016	0.0089	0.0067	0.074	0.034	0.03	0.0098	0.0079	0.017	0.019	0.0087	0.0043	0.007	0.0056	0.00069	0.0031	0.0024	0.002	0.0097	0.078	0.064	0.027	0.077	0.02	0.0098	0.025	0.0095
Inosine	0.09	0.17	0.37	0.085	0.021	0.099	0.072	0.053	0.027	0.042	0.097	0.079	0.0089	0.16	0.076	0.092	0.84	0.11	0.048	0.068	0.092	0.17	0.11	0.069	0.035	0.11	0.086	0.11	0.11	0.05	0.097	0.1	0.1	0.067	0.11	0.11	0.0055	0.0075	0.0099	0.011	0.24	0.28	0.24	0.17	0.1	0.096	0.15	0.097	0.32
Glu-Glu	0	0.0011	0	0	0.00078	0	0	0.00053	0.0011	0.0015	0	0.0012	0	0	0	0	0	0	0	0	0	0	0	0	0	0	0	0	0	0	0	0	0	0	0	0	0	0	0	0	0	0	0	0	0	0	0	0	0
1-Methyladenosine	0.00062	0.00031	0	0	0.0015	0.001	0.00077	0.0011	0.0011	0.001	0	0.00068	0.0023	0.00072	0	0.00032	0.00062	0	0	0.0003	0	0	0	0	0	0.00027	0	0	0	0	0	0	0.00036	0	0	0.00028	0	0	0	0	0	0.00041	0.0003	0	0.00044	0	0	0.00025	0
Guanosine	0.0077	0.016	0.055	0.007	0.0027	0.0076	0.0052	0.0054	0.0033	0.0071	0.0097	0.0072	0.00053	0.0093	0.0017	0.0069	0.02	0.0012	0.00075	0.00073	0.0077	0.011	0.0079	0.0065	0.0048	0.016	0.012	0.015	0.012	0.0047	0.01	0.013	0.0029	0.0042	0.006	0.0047	0.00041	0.00061	0.00054	0.00076	0.016	0.025	0.021	0.013	0.021	0.022	0.03	0.018	0.02
Xanthosine	0.0035	0	0	0	0.0034	0	0	0	0.0035	0.0058	0	0.003	0	0	0	0	0	0	0	0	0	0	0	0	0	0	0	0	0	0	0	0	0.0032	0.0014	0	0	0	0	0	0	0	0	0	0.0017	0	0	0	0	0.0039
Ophthalmate	0.0017	0.0018	0.0062	0.0027	0.00095	0.0053	0.0016	0.0012	0.00061	0.0007	0.00076	0.0016	0.0012	0.0049	0.0061	0.0082	0.0014	0.0044	0.0047	0.018	0.0012	0.0026	0.0014	0.0016	0.00098	0.00071	0.0015	0.0021	0.0011	0.0012	0.0013	0.0021	0.022	0.0042	0.006	0.005	0.0014	0.0014	0.0014	0.0059	0.0027	0.0098	0.0029	0.0017	0.0052	0.0037	0.0016	0.0032	0.016
5-Methylthioadenosine	0	0	0	0	0	0.00051	0.00037	0	0.00021	0	0	0	0	0	0.001	0.0016	0	0	0	0.00042	0.00081	0.00075	0.00089	0.00096	0.00075	0.0014	0.0013	0.0015	0.0007	0	0.001	0.0005	0.00052	0	0.00063	0.00037	0	0.00026	0.00057	0	0	0.0013	0.00052	0	0.00078	0	0	0.00042	0
Glutathione(ox)	0.0047	0.059	0.13	0.088	0.035	0.046	0.063	0.03	0.014	0.024	0.0096	0.032	0.032	0.077	0.26	0.24	0.041	0.084	0.22	0.16	0.15	0.2	0.2	0.22	0.14	0.39	0.24	0.4	0.12	0.073	0.056	0.095	0.16	0.11	0.14	0.061	0.052	0.079	0.2	0.13	0.17	0.18	0.17	0.17	0.19	0.18	0.15	0.096	0.069
Glutathione(red)	0.00034	0.12	0.17	0.0085	0.0052	0.055	0.055	0.013	0.0077	0.025	0.0053	0.052	0.0059	0.0023	0.023	0.84	0.0047	0.0011	0.0044	0.18	0.53	0.69	0.71	0.31	0.27	0.34	0.59	0.59	0.33	0.077	0.89	0.88	1.2	0.37	0.93	0.21	0.058	0.029	0.071	0.12	0.48	1.4	0.76	0.7	0.94	1.2	0.76	0.71	0.41
S-Lactoylglutathione	0	0	0	0	0	0	0	0	0	0	0	0	0	0	0.0015	0.002	0	0	0.0015	0.0027	0	0.0027	0.0017	0.0012	0	0.0028	0.0026	0.0033	0.0011	0	0	0.0017	0.0011	0	0.0016	0	0	0.00077	0	0	0	0.0013	0.0024	0.0019	0.0023	0.0023	0	0.0013	0
Propionate	0	0	0	0	0	0	0	0	0	0	0	0	0	0	0	0	0	0	0	0	0	0	0	0	0	0	0	0	0	0	0	0	0	0	0	0	0	0	0	0	0	0	0	0	0	0	0	0	0
Crotonate	0	0	0	0	0	0	0	0	0	0	0	0	0	0	0	0	0	0.0073	0	0	0	0	0	0	0	0	0	0	0	0	0	0	0	0	0	0	0	0	0	0	0	0	0	0	0	0	0	0	0
Pyruvate	0	0	0	0	0	0	0	0	0	0	0	0	0	0	0	0	0	0.15	0	0.12	0	0	0	0	0	0	0	0	0	0	0	0	0	0	0	0	0	0	0	0	0	0	0	0	0	0	0	0	0
Butanoate	0	0	0	0	0	0	0	0	0	0	0	0	0	0.016	0.0089	0	0.011	0.022	0.039	0	0	0	0	0	0	0	0	0	0	0	0	0	0	0	0	0	0	0	0	0.037	0	0	0.012	0	0	0	0	0	0
Lactate	6.4	8.1	4.7	5.5	7.7	9.9	12	9	8.8	6.2	6	12	10.5	5.3	4.7	7.6	4	6	4.3	12.1	4.7	4.8	4.6	4.7	2.2	4	4.3	6.1	4.1	2.8	3.3	5.2	4.4	2.6	4	2.5	1.8	1.8	2.5	3.6	6.2	10.2	5.7	7.6	5.8	7.8	7.1	6.2	11.8
3-Hydroxypropionate	0	0	0.075	0	0.1	0.12	0.14	0	0.086	0	0	0.1	0.068	0.079	0.035	0	0	0.048	0.059	0.12	0	0.029	0	0.029	0	0	0	0	0	0	0	0	0.061	0	0.033	0	0	0	0	0	0	0.14	0	0	0	0.066	0	0	0
Tiglate	0	0	0	0	0	0	0	0	0	0	0	0	0	0	0	0	0	0	0.01	0	0	0	0	0	0	0	0	0	0	0	0	0	0	0	0	0	0	0	0.012	0	0	0	0	0	0	0	0	0	0
Pentanoate	0	0	0	0	0	0	0	0	0	0	0	0	0	0	0	0	0	0.0031	0.0057	0	0	0	0	0	0	0	0	0	0	0	0	0	0	0	0	0	0.0036	0	0	0	0	0	0	0	0	0	0	0	0
3-Methylbutanoate	0	0	0	0	0	0	0	0	0	0	0	0	0	0	0.0032	0	0	0.0093	0.014	0	0	0	0	0	0	0	0	0	0	0	0	0	0	0	0	0	0.0077	0.0093	0.021	0.019	0	0	0	0	0.0067	0	0	0	0
Malonate	0.0053	0.0062	0.0057	0.0042	0.0058	0.0037	0.0059	0.008	0.0058	0.0052	0.0039	0.0061	0.0074	0.0079	0.003	0.0047	0.0048	0.0036	0.0061	0.008	0.0036	0.0036	0.0041	0.0043	0.0027	0.0051	0.0065	0.0039	0.0045	0.0094	0.013	0.0046	0.0058	0.0057	0.0055	0.0043	0.0062	0.0029	0.0052	0.0094	0.0058	0.006	0.003	0.0046	0.0056	0.0059	0.0084	0.0036	0.0064
3-Hydroxybutyrate	0.027	0.035	0.046	0.031	0.026	0.061	0.047	0.035	0.046	0.037	0.036	0.042	0.19	0.13	0.056	0.16	4.5	0.038	0.014	0.15	0.026	0.022	0.019	0.02	0.012	0.018	0.02	0.03	0.021	0	0	0.017	0.067	0.05	0.056	0.057	0.011	0.023	0.035	0.035	0.035	0.046	0.029	0.022	0.023	0.04	0.039	0.02	0.058
2-Hydroxyisobutyrate	0	0	0	0	0.003	0.0047	0	0	0.0037	0.0021	0.003	0.0055	0.0037	0.0052	0	0	0	0.0038	0	0	0	0	0	0	0	0	0	0	0	0	0	0	0.0092	0	0.0059	0.0042	0	0	0	0	0	0	0	0	0	0	0	0	0
2-Hydroxybutyrate	0	0.023	0.011	0.012	0.0081	0.052	0.035	0.0064	0.0092	0.03	0.014	0.015	0.057	0.034	0.014	0.015	0.022	0.029	0.013	0.036	0	0.0034	0.0033	0.0043	0.0027	0	0.0052	0.0056	0.0044	0	0	0	0	0.0087	0.007	0.0075	0	0.0078	0.01	0.0071	0.027	0.0092	0.0091	0	0.014	0.013	0.01	0.0066	0.06
Methyl sulfate	0.012	0	0	0	0.0025	0.0017	0	0	0	0	0	0	0.0039	0	0	0.0033	0.0036	0.0034	0	0.004	0	0	0	0	0	0	0	0	0	0	0	0	0	0	0.0035	0	0	0.0015	0.0048	0	0	0	0.0029	0	0.0014	0.0038	0	0	0.0027
2-Furoate	0	0	0	0	0	0	0	0	0	0	0	0	0.0057	0	0	0	0	0	0	0	0	0	0	0	0	0	0	0	0	0	0	0	0	0	0	0	0	0	0	0	0	0	0	0	0	0	0	0	0
Fumarate	0.018	0.0065	0.006	0.019	0.079	0.044	0.055	0.043	0.026	0.0058	0.024	0.046	0.11	0.018	0.03	0.045	0.033	0.021	0.091	0.055	0.022	0.018	0.018	0.031	0.011	0.018	0.032	0.037	0.02	0.019	0.027	0.03	0.038	0.024	0.079	0.1	0.016	0.015	0.033	0.049	0.029	0.038	0.032	0.027	0.021	0.018	0.02	0.019	0.032
2-Oxoisopentanoate	0	0	0	0	0	0	0	0	0	0	0	0	0	0	0	0	0	0.0091	0.0051	0.0047	0	0	0	0	0	0	0	0	0	0	0	0	0	0	0	0	0	0	0	0	0	0	0	0	0	0	0	0	0
4-Oxopentanoate	0.0087	0.0052	0.0057	0.007	0.0079	0.0061	0.006	0.0091	0.0076	0.0078	0.006	0.0074	0.0078	0.011	0.0063	0.0075	0.0075	0.0053	0.0075	0.011	0	0.0033	0.003	0.0033	0.0025	0.0044	0.0037	0.0044	0.003	0.0068	0	0.0051	0.0066	0	0.004	0.004	0.0093	0.0059	0.014	0.012	0.0076	0.01	0.0062	0.0071	0.0087	0.0077	0.0089	0.0058	0.0087
Hexanoate	0	0	0.0041	0	0.0034	0	0	0.0039	0.0033	0	0	0	0.004	0.012	0.0045	0	0.0064	0.014	0.02	0	0	0	0	0	0	0	0	0	0	0	0	0	0.0043	0	0.0025	0	0.01	0.0074	0.017	0.016	0.0076	0	0.006	0.0047	0.0072	0.0047	0.008	0.0019	0
Succinate	0.33	0.37	0.31	0.27	0.17	0.2	0.2	0.26	0.4	0.37	0.2	0.33	0.47	0.36	0.26	0.51	0.17	0.11	0.12	0.14	0.22	0.23	0.23	0.21	0.12	0.21	0.24	0.3	0.14	0.1	0.22	0.18	0.67	0.35	0.5	0.33	0.15	0.13	0.27	0.33	0.38	0.42	0.23	0.41	0.29	0.38	0.35	0.21	0.28
2-Hydroxypentanoate	0.03	0.054	0.052	0.072	0.059	0.055	0.051	0.057	0.064	0.052	0.047	0.055	0.08	0.078	0.046	0.044	0.1	0.056	0.061	0.051	0.025	0.018	0.019	0.013	0.011	0.017	0.023	0.027	0.012	0.018	0.015	0.015	0.023	0.011	0.015	0.012	0.063	0.042	0.073	0.089	0.076	0.089	0.063	0.063	0.061	0.11	0.081	0.037	0.084
Benzoate	0	0.022	0.022	0.034	0.051	0.053	0.034	0.028	0.038	0.029	0.023	0.026	0.034	0.043	0.053	0.021	0.03	0.039	0.065	0	0	0	0	0	0	0	0	0	0	0	0	0.013	0	0	0	0	0.032	0.041	0.048	0.075	0.07	0.051	0.036	0.043	0.041	0.028	0.045	0.018	0.047
Isethionate	0.016	0.013	0.0078	0.0084	0.012	0.023	0.016	0.0091	0.014	0.011	0.01	0.015	0.0041	0.0069	0.0018	0	0.0045	0.0025	0.0053	0	0.005	0.0033	0.0049	0.0052	0.0021	0.0049	0.0038	0.0072	0.0022	0	0.0061	0.0042	0.0046	0	0.0032	0.0033	0.015	0.0094	0.018	0.025	0.0066	0.015	0.0061	0.0084	0.0055	0.019	0.012	0.0029	0.013
5-Oxoproline	0.21	0.12	0.09	0.084	0.24	0.35	0.17	0.21	0.34	0.25	0.15	0.14	0.12	0.038	0.021	0.034	0.15	0.046	0.12	0.1	0.072	0.072	0.089	0.06	0.047	0.1	0.12	0.13	0.053	0.062	0.057	0.075	0.11	0.06	0.1	0.11	0.018	0.023	0.037	0.029	0.076	0.056	0.045	0.052	0.059	0.13	0.072	0.038	0.057
Citraconate	0	0	0	0	0	0	0	0	0	0	0	0	0	0	0	0	0	0	0.00055	0	0	0	0	0	0	0	0	0	0	0	0	0	0	0	0	0	0	0.0004	0	0	0	0	0	0	0	0	0	0	0
4-Methyl-2-oxopentanoate	0	0	0	0	0	0	0	0	0	0	0	0	0	0	0.0036	0.0033	0	0.019	0.0075	0	0	0	0	0	0	0	0	0	0	0	0	0	0	0.0045	0	0	0	0.0069	0	0	0	0	0	0	0	0	0.0028	0	0
4-Acetylbutyrate	0.0086	0.013	0.015	0.014	0.016	0.012	0.0093	0.015	0.014	0.011	0.012	0.014	0.019	0.021	0.013	0.0094	0.016	0.017	0.018	0.016	0	0.0021	0.0028	0.0034	0.0015	0.0024	0.0019	0.0025	0.0019	0	0.0067	0.0027	0.004	0.0023	0	0.0016	0.017	0.011	0.024	0.029	0.016	0.02	0.014	0.014	0.013	0.014	0.017	0.0079	0.015
Heptanoate	0	0	0	0.0024	0.0025	0	0	0	0	0.0015	0.0027	0	0.0034	0.0088	0.0041	0	0.0036	0.011	0.015	0.0029	0	0	0	0	0	0	0	0	0	0	0	0	0.0017	0.0021	0	0	0.0053	0.0041	0.011	0.011	0	0	0.0024	0	0	0	0.0028	0.0017	0
N-Acetyl-beta-alanine	0	0	0.0028	0	0	0.0019	0.0015	0	0.0061	0.0034	0.0032	0.0017	0	0	0	0	0.0019	0	0	0	0.0034	0	0	0.0026	0.0013	0	0	0.0036	0.002	0	0	0	0	0	0	0.0043	0	0	0	0	0.002	0.004	0.0024	0	0	0	0.002	0	0
Glutarate	0.0037	0.0046	0.0021	0.0031	0.0028	0.0022	0.0031	0.002	0.0035	0.0027	0.0026	0.0032	0.007	0.0071	0.0049	0.0041	0.0094	0.003	0.0033	0	0	0.0018	0	0	0.0021	0.0023	0.0016	0.0039	0.002	0	0	0.0028	0.0055	0.0077	0.0053	0.0072	0.0027	0.0022	0	0	0.0039	0.0066	0	0.0019	0.0041	0.0035	0.0035	0.0028	0.0039
3-Ureidopropionate	0	0	0	0	0	0	0	0	0	0	0	0	0	0.011	0	0	0	0	0.01	0	0	0	0	0	0	0	0	0	0	0	0	0	0	0	0	0	0	0	0	0	0	0	0	0	0	0	0	0	0
6-Hydroxyhexanoate	0	0	0	0.013	0	0	0	0	0	0	0	0	0.026	0.023	0	0	0.029	0	0	0	0	0	0	0	0	0	0	0	0	0	0	0	0.022	0	0	0.014	0	0	0	0	0	0.022	0	0	0.015	0	0.022	0	0.03
2-Hydroxy-4-methylpentanoate	0	0	0	0	0	0	0	0	0	0	0	0	0	0	0	0	0.0021	0	0	0	0	0	0	0	0	0	0	0	0	0	0	0	0	0	0	0	0	0	0	0	0	0	0	0	0	0	0	0	0
Malate	0.0083	0.05	0.039	0.093	0.22	0.13	0.24	0.14	0.12	0.02	0.1	0.21	0.18	0.023	0.15	0.22	0.11	0.064	0.2	0.19	0.063	0.072	0.068	0.089	0.042	0.084	0.12	0.13	0.07	0.053	0.09	0.11	0.1	0.074	0.19	0.11	0.068	0.051	0.12	0.18	0.13	0.17	0.13	0.12	0.11	0.1	0.12	0.076	0.17
Ethanolamine phosphate	0.094	0.46	0.61	0.42	0.4	0.45	0.51	0.47	0.19	0.2	0.14	0.27	0.25	0.27	0.78	0.98	0.21	0.02	0.011	0.03	0.42	0.91	0.71	0.45	0.23	0.68	0.67	0.74	0.36	0.2	0.52	0.5	2.1	0.84	1.2	0.97	0.025	0.059	0.038	0.052	0.85	0.62	0.71	0.79	0.77	0.87	0.63	0.47	0.44
Octanoate	0	0	0	0	0	0	0	0	0	0	0	0	0	0.0087	0.0042	0	0	0.011	0.012	0.0041	0	0	0	0	0	0	0	0	0	0	0	0	0	0	0	0.0017	0.012	0.012	0.031	0.028	0.0074	0	0.0067	0.0081	0	0	0.0068	0	0
Adipate	0	0	0	0	0.0048	0.0039	0	0	0	0	0	0	0	0.01	0	0	0.024	0	0	0	0	0	0	0	0	0	0	0.0072	0	0	0	0	0	0	0.0053	0.0057	0.0069	0.0024	0	0	0	0	0.0061	0	0	0.0079	0	0	0
2-Hydroxyglutarate	0.0034	0.0034	0.003	0.0028	0.0028	0.0044	0.0042	0.0033	0.0074	0.0028	0.0036	0	0.0035	0	0.0057	0.0037	0.013	0.0035	0.0073	0.0051	0.0073	0.025	0.011	0.0056	0.01	0.0039	0.0062	0.011	0.0067	0.0054	0.0075	0.0046	0.005	0	0.0019	0.0017	0.0026	0.006	0.0046	0.0031	0.0088	0.039	0.021	0.0089	0.009	0.0084	0.01	0.0044	0.0046
Citramalate	0	0	0	0	0	0	0	0	0	0	0	0	0.0017	0	0	0	0	0	0	0	0	0	0	0	0	0	0	0	0	0	0	0	0.005	0	0.0033	0.0012	0	0	0	0	0	0	0	0	0	0	0	0	0
trans-Cinnamate	0.13	0.13	0.12	0.087	0.14	0.13	0.15	0.17	0.18	0.12	0.078	0.18	0.066	0.038	0.074	0.049	0.028	0.0075	0.0075	0.01	0.12	0.16	0.16	0.1	0.073	0.14	0.16	0.19	0.085	0.056	0.1	0.12	0.14	0.064	0.12	0.085	0.0081	0.012	0.024	0.025	0.16	0.13	0.13	0.14	0.14	0.14	0.14	0.086	0.13
3-Phenylpropionate	0	0	0	0	0	0	0	0	0	0	0	0	0	0	0	0	0	0	0	0	0	0	0	0	0	0	0	0	0	0	0	0	0	0	0	0	0.007	0	0	0	0	0	0	0	0	0	0	0	0
p-Hydroxyphenylacetate	0	0	0	0	0	0	0	0	0	0	0	0	0	0	0	0	0	0	0	0	0	0	0	0	0	0	0	0	0	0	0	0	0	0	0	0	0	0	0	0	0	0	0	0	0	0	0	0	0
Cysteine sulfinate	0	0	0	0	0	0	0	0	0	0	0	0	0.0095	0	0.004	0	0	0	0	0	0	0	0	0	0	0	0	0	0	0	0	0	0	0	0	0	0	0	0	0	0	0	0	0	0	0	0	0	0
Pelargonate	0	0	0	0.0019	0	0	0	0	0	0	0	0	0	0.0083	0.0022	0	0	0.0081	0.011	0.0058	0	0	0	0	0	0	0	0	0	0	0	0	0	0	0	0	0.0047	0.0048	0.011	0.012	0.0039	0	0.0025	0	0	0.0035	0	0	0
Pimelate	0	0	0	0	0	0	0	0	0	0	0	0	0	0	0	0	0	0	0	0	0	0	0	0	0	0	0	0	0	0	0	0	0	0	0	0	0	0	0	0	0	0	0	0	0	0	0	0	0
3-Hydroxy-3-methylglutarate	0.0066	0.011	0.014	0.01	0.0074	0.0056	0.0069	0.0055	0.015	0.016	0.01	0.011	0.0017	0	0	0	0.0059	0	0	0	0.0034	0.0051	0.0039	0.0023	0.0024	0.0022	0.0036	0.0034	0.0016	0	0.0013	0.0022	0.0016	0	0.0014	0.0013	0	0.001	0	0	0.016	0.021	0.0085	0.01	0.01	0.018	0.0037	0.0037	0.012
Terephthalate	0.0028	0.0021	0.0025	0.0023	0.0029	0.0017	0.002	0.0023	0.003	0.0019	0.0019	0.0024	0.0026	0.0026	0.0015	0.0022	0.0016	0.0018	0.0021	0.0021	0.0018	0	0.0025	0.0018	0.001	0.0011	0.0012	0.0012	0.0012	0.0034	0.0027	0.0016	0.0024	0	0.002	0.0017	0.0034	0.0017	0.0033	0.0038	0.0021	0.0032	0.002	0.0023	0.0022	0.0027	0.0032	0.0016	0.0027
Phthalate	0.00057	0	0.00057	0.0004	0.00035	0.00028	0.00044	0.00058	0	0	0	0	0.00067	0.00069	0.00028	0.00052	0.00049	0	0	0	0.0004	0.00032	0.00043	0.0004	0	0	0.00044	0.00043	0	0.00077	0.00081	0	0.00042	0.00055	0.00037	0.00036	0.00051	0.00062	0	0	0.00083	0.00067	0	0	0.00049	0.00042	0.00087	0	0.00056
2,3-Pyridinedicarboxylate	0	0	0	0	0	0	0	0	0	0	0	0	0	0	0	0	0	0	0	0	0	0	0	0	0	0	0	0	0	0	0	0	0	0	0.0019	0	0	0	0	0	0	0	0	0	0	0	0	0	0
PEP	0	0	0.0025	0.0013	0.0069	0	0.0042	0.0024	0	0	0.0025	0.0076	0.0028	0	0	0.0015	0.0058	0.013	0.0033	0.0085	0	0	0	0	0	0	0	0	0	0	0	0.001	0	0	0.002	0.0016	0.004	0.0022	0.0028	0	0.0019	0	0.0013	0	0	0	0	0	0
Cysteate	0	0	0	0	0	0	0	0	0	0	0	0	0.003	0	0	0	0	0	0	0	0	0	0	0	0	0	0	0	0	0	0	0	0	0	0	0	0	0	0	0	0	0	0	0	0	0	0	0	0
DHAP	0	0	0	0	0	0	0	0	0	0	0	0	0	0	0	0	0	0	0	0	0	0	0	0	0	0	0	0	0	0	0	0.017	0.0073	0	0.01	0.0026	0.012	0.0062	0.015	0.013	0.019	0.033	0.034	0.017	0.014	0.019	0.021	0.018	0
Glycerophosphate	0.17	0.15	0.51	0.15	0.1	0.038	0.051	0.19	0.09	0.27	0.069	0.048	0.29	0.17	0.24	0.62	0.12	0.079	0.15	0.6	0.39	0.45	0.46	0.29	0.31	0.55	0.48	0.79	0.27	0.12	0.34	0.34	1	0.34	0.78	0.55	0.21	0.21	0.49	0.5	0.41	0.59	0.43	0.54	0.36	0.35	0.35	0.19	0.1
Decanoate	0	0	0	0	0	0	0	0	0	0	0	0	0	0.0043	0	0	0	0.0071	0.0059	0	0	0	0	0	0	0	0	0	0	0	0	0	0	0	0	0	0	0	0	0.013	0	0	0	0	0	0	0	0	0
cis-Aconitate	0.0013	0	0	0	0	0.0012	0	0	0.0015	0	0.002	0	0	0	0.002	0.0026	0.0013	0.0017	0.0046	0	0	0	0	0	0	0.0011	0.0027	0.0015	0.00076	0	0	0	0	0	0.0012	0.001	0.0021	0.0022	0.003	0.0027	0.001	0.0042	0.0018	0.00094	0.0019	0	0	0.0013	0
trans-Aconitate	0	0	0	0	0	0	0	0	0.0022	0.002	0	0	0	0	0	0.002	0	0	0	0	0	0	0	0	0	0	0	0	0	0	0	0	0	0	0	0	0	0.001	0	0	0	0.0036	0	0	0	0.0027	0	0	0
N-Acetylaspartate	3	2.5	3.2	2.1	1.8	2.4	2.1	2	3.2	1	1.7	2.4	0.24	0.067	0.011	0.05	0.52	0.0039	0.0024	0.003	3.7	3.6	3.4	3.7	1.6	3.6	3.2	4	3.1	1.6	3.8	3.8	0.15	0.056	0.18	0.11	0.0058	0.061	0.0055	0.0078	3.8	4	3.5	4.6	3	3	3	2.1	4.5
Hippurate	0	0	0	0	0	0	0	0	0	0	0	0	0	0.017	0	0	0	0	0	0	0	0	0	0	0	0	0	0	0	0	0	0	0.027	0.011	0.0056	0.0082	0.02	0.0039	0	0	0.0081	0	0.0025	0	0	0	0	0	0
Homovanillate	0	0	0	0	0	0	0	0	0	0	0	0	0	0	0	0	0.01	0	0	0	0	0	0	0	0	0	0	0	0	0	0	0	0	0	0.01	0	0.0034	0	0.0042	0	0	0	0.004	0	0	0.004	0	0.0022	0
4-Pyridoxate	0	0	0	0	0	0	0	0	0	0	0	0	0.00065	0	0	0	0	0	0	0	0	0	0	0	0	0	0	0	0	0	0	0	0.00094	0	0.0003	0.00026	0.0004	0	0	0	0	0	0	0	0	0	0	0	0
O-Phosphoserine	0	0.0023	0.0015	0	0	0	0	0	0.0024	0	0	0	0	0	0	0	0	0	0	0	0	0	0	0	0	0.0016	0	0	0	0	0	0	0.01	0.0077	0.011	0	0	0	0	0	0	0	0	0	0	0	0	0	0
3PG	0	0	0.0071	0.0046	0.02	0.0059	0.017	0.0084	0	0	0.0083	0.023	0.002	0.0019	0.0024	0.01	0.0087	0.018	0.0026	0.019	0	0.0053	0	0	0	0.0028	0.0034	0.0046	0.0033	0	0	0.0065	0.0035	0.0026	0.012	0.0021	0.023	0.0053	0.014	0.019	0.011	0.0093	0.011	0.0053	0.006	0.0054	0.0064	0.0041	0.003
Azelate	0.0082	0.0023	0.0042	0.0041	0.0041	0.0035	0.0027	0.0032	0.0041	0.0024	0.0035	0.0031	0.0063	0.0078	0.0031	0.0045	0.0038	0.0035	0.005	0.0057	0.0031	0.0027	0.0029	0.0031	0.0019	0.0037	0.0037	0.0031	0.0032	0.0059	0.0054	0.0032	0.0042	0.0032	0.0041	0.0027	0.0042	0.0041	0.006	0.0063	0.0047	0.0064	0.0033	0.0032	0.0029	0.0034	0.0047	0.0023	0.0063
N-Acetylglutamate	0.066	0.047	0.075	0.047	0.069	0.13	0.075	0.084	0.069	0.046	0.044	0.039	0.0044	0.0028	0.0019	0.0009	0.013	0.0012	0.0021	0.0011	0.033	0.046	0.028	0.021	0.023	0.045	0.055	0.071	0.02	0.012	0.018	0.024	0.0019	0	0.0047	0.0016	0	0.00085	0	0.0018	0.1	0.086	0.074	0.072	0.11	0.1	0.08	0.06	0.075
N-Carbamylglutamate	0	0	0	0	0	0.0021	0	0	0	0	0	0	0	0	0	0	0	0	0	0	0	0	0	0	0	0	0.0024	0	0	0	0	0	0	0	0	0	0	0	0	0	0	0	0	0	0	0.0042	0	0.0019	0
N-Acetylmethionine	0.0046	0.0069	0.0046	0.0041	0.0095	0.01	0.013	0.016	0.013	0.017	0.0082	0.015	0.0042	0	0.0015	0.001	0	0	0	0	0	0	0	0	0	0	0	0	0	0	0	0	0.0024	0	0.0012	0.0011	0	0	0	0	0.001	0	0.0017	0.0023	0	0	0.0036	0.00083	0.0011
Isocitrate	0	0	0	0.0013	0	0.0017	0	0	0.0019	0	0.0019	0	0	0	0.0021	0.002	0	0	0	0	0	0	0	0	0	0	0	0	0	0	0	0.0019	0	0	0.0016	0	0.0028	0.0015	0	0.0035	0	0.0036	0.0017	0	0.0023	0	0	0.001	0
Citrate	0.0021	0.0083	0.0032	0.019	0.013	0.012	0.005	0.0076	0.03	0.002	0.061	0.0048	0.002	0.0024	0.032	0.058	0.008	0.017	0.02	0.0081	0.005	0.018	0.013	0.0065	0.0044	0.023	0.052	0.036	0.0074	0.0057	0.016	0.03	0.0065	0.018	0.038	0.0045	0.032	0.039	0.034	0.046	0.033	0.076	0.044	0.014	0.034	0.008	0.018	0.033	0.012
Glucuronate	0	0	0	0	0	0	0	0	0	0	0	0	0	0	0	0	0	0	0	0	0	0	0	0	0	0	0	0	0	0	0	0	0.012	0	0.007	0.007	0	0	0	0	0	0.0055	0	0	0	0	0	0	0
trans-4-Hydroxy-3-methoxycinnamate	0.0066	0	0	0.0061	0	0	0	0	0	0	0	0	0	0	0.0034	0	0	0	0	0	0	0	0	0	0	0	0	0	0	0	0	0	0	0	0	0	0	0.002	0.0058	0	0	0	0	0	0	0	0	0.002	0
Gluconate	0	0	0	0	0	0.0086	0.017	0	0.014	0	0	0.029	0.019	0	0	0	0	0	0	0	0	0	0	0	0	0	0	0	0	0	0	0	0.023	0	0.007	0.011	0	0	0	0	0	0	0.0093	0	0	0	0	0.0085	0.028
Cysteine S-sulfate	0.0038	0	0	0	0	0	0	0	0	0	0	0	0	0	0	0	0	0	0	0	0	0	0	0	0	0	0	0	0	0	0	0	0	0	0	0	0	0	0	0	0	0	0	0	0	0	0	0	0
Sebacate	0.001	0.00073	0.00076	0.00073	0.00067	0.00052	0.00037	0.0008	0.00091	0.00054	0.00056	0.0011	0.0011	0.0011	0.00066	0.0006	0.00086	0.00062	0.00072	0	0.00058	0	0.00058	0	0.00028	0	0.00046	0	0	0.0013	0	0.00045	0	0.00072	0.00063	0.00052	0.00092	0.00069	0.001	0.00085	0.00092	0.0014	0.00069	0.00082	0.0005	0.00076	0.0014	0	0.0012
Saccharate	0	0	0	0	0	0	0	0	0	0	0	0	0	0	0	0	0	0	0	0	0	0	0	0	0	0	0	0	0	0	0	0	0	0.003	0.0046	0.0014	0.0019	0	0	0	0	0	0	0	0	0	0	0	0
Mucate	0	0	0.001	0	0	0	0	0	0	0	0	0	0	0	0	0	0	0	0	0	0	0	0	0	0	0	0	0	0	0	0	0	0	0	0	0	0	0	0	0	0	0	0	0	0	0	0	0	0
3-Indoxyl sulfate	0	0	0	0	0	0	0	0	0	0	0	0	0	0	0	0	0	0	0	0	0	0	0	0	0	0	0	0	0	0	0	0	0.0051	0	0.004	0.0016	0.0022	0	0	0	0	0	0	0	0	0	0	0	0
Pantothenate	0.015	0.012	0.012	0.0082	0.016	0.01	0.014	0.018	0.019	0.018	0.0076	0.014	0.037	0.0033	0.0018	0.0039	0.0068	0.0027	0.01	0.0089	0.012	0.0077	0.0072	0.0092	0.0061	0.015	0.011	0.013	0.0047	0.003	0.014	0.0076	0.0078	0.0023	0.0064	0.0039	0.0035	0.0029	0.0061	0.0051	0.014	0.0066	0.021	0.017	0.014	0.02	0.019	0.0084	0.0082
R5P	0	0	0	0	0	0	0	0	0	0	0	0	0	0	0	0	0	0	0	0	0	0	0	0	0	0	0	0	0	0	0	0.014	0.007	0	0.0059	0.0035	0	0	0	0	0.0074	0.013	0.016	0	0.012	0	0.015	0.0073	0.014
Ru5P	0	0.0086	0.028	0	0.0058	0.0095	0.005	0.0071	0	0.003	0.0044	0	0	0.0056	0.011	0.021	0.11	0.025	0.01	0.07	0.016	0.017	0.013	0.013	0.0062	0.011	0.007	0.011	0.018	0	0	0.019	0.021	0.012	0.019	0.019	0.0052	0	0	0.0027	0.024	0.046	0.042	0.019	0.012	0.0071	0.016	0.019	0.023
Dodecanedioate	0	0	0	0	0	0	0	0	0	0	0	0	0	0	0	0	0	0	0	0	0	0	0	0	0	0	0	0	0	0	0	0	0	0	0	0	0	0.00027	0	0.00061	0	0	0	0	0.00043	0	0	0	0
N-alpha-t-Boc-asparagine	0	0	0.001	0.0011	0	0.00047	0	0.00057	0.00074	0	0	0	0	0	0	0	0	0	0	0	0	0	0	0	0	0	0	0	0	0	0	0.00077	0	0	0	0	0	0	0	0	0.00095	0.0013	0	0	0.0006	0	0	0	0
2-Deoxyglucose 6-phosphate	0	0	0	0	0	0	0	0	0	0.0023	0	0	0	0	0	0	0.0045	0	0.0038	0	0	0.001	0	0	0	0	0.0022	0.0028	0	0	0	0	0	0	0	0	0	0	0	0	0	0	0	0	0	0	0	0	0
G6P	0.006	0.019	0.014	0.0057	0.012	0.024	0.034	0.016	0.013	0.0069	0.024	0.036	0.017	0.0068	0.014	0.12	0.0089	0.028	0.45	1	0.0095	0.056	0.012	0.0034	0.0025	0.0038	0.0047	0.0045	0.022	0.011	0.015	0.049	0.013	0.0093	0.011	0.0055	0.16	0.17	0.32	0.54	0.0052	0.027	0.038	0.0082	0.0041	0.0074	0.0021	0.03	0.028
F6P	0	0.0079	0.0048	0	0.0044	0.0061	0.0092	0	0.0044	0.0029	0.007	0.011	0.0072	0	0.0061	0.028	0.0034	0.0074	0.1	0.26	0.0035	0.015	0.006	0	0	0	0	0	0.0073	0	0	0.011	0.0061	0.0033	0.0045	0.0033	0.042	0.04	0.076	0.12	0	0.0091	0.013	0	0	0	0	0.01	0.0056
G1P	0	0.0044	0.0026	0.0032	0.0064	0.0031	0.01	0.0049	0.0034	0.0032	0.0036	0.0072	0.012	0.0071	0.032	0.035	0.0089	0.0035	0.031	0.1	0.0076	0.03	0.0079	0.0056	0	0	0.0015	0	0.016	0.0083	0.0095	0.028	0.006	0.0023	0	0.0033	0.01	0.0089	0.021	0.029	0.024	0.029	0.042	0.0075	0.0064	0.0037	0	0.025	0.029
2,3-DPG	0	0	0	0	0	0	0	0	0	0	0	0	0	0	0.0077	0	0	0.02	0	0.0067	0	0	0	0	0	0	0	0	0	0	0	0	0	0.0042	0	0	0	0	0	0	0	0	0	0	0	0	0	0	0
6-Phosphogluconate	0	0	0	0	0	0	0.0021	0	0	0	0	0.0037	0	0	0.018	0.011	0	0.0027	0	0.007	0	0.0066	0	0	0	0.003	0.0016	0	0.0032	0	0	0.0081	0	0	0.0029	0.0025	0	0	0	0	0	0.0046	0.013	0	0	0	0	0	0
S7P	0.0063	0.017	0.017	0.0071	0.0071	0.016	0.021	0.01	0.0049	0.007	0.0054	0.015	0.006	0.004	0.0044	0.021	0.0092	0	0.0034	0.0041	0.0067	0.021	0.0072	0.0041	0.0052	0.0087	0.0095	0.01	0.0056	0	0.01	0.01	0.055	0.026	0.049	0.023	0	0.0017	0	0	0.0063	0.011	0.011	0.0075	0.0061	0.008	0.0036	0.0087	0.015
Argininosuccinate	0	0	0	0	0.02	0	0.01	0.0071	0	0	0.0048	0	0.012	0	0.0079	0.0022	0.0059	0	0.0081	0	0	0	0	0	0	0	0	0	0	0	0	0	0	0	0	0.0047	0	0	0	0	0	0	0	0	0	0	0	0	0
N-Acetylglucosamine 6-phosphate	0.0038	0.0052	0.0058	0.004	0.01	0.014	0.017	0.012	0.005	0.0053	0.012	0.012	0.0086	0.0041	0.0076	0.013	0.012	0	0	0	0	0.0025	0.0023	0	0	0.0049	0.004	0.0039	0.0023	0	0	0	0.0041	0	0.0032	0.0035	0	0	0	0	0.0048	0.0046	0.0035	0.0058	0.0046	0.0046	0.0087	0.0024	0.007
N-Acetylglucosamine 1-phosphate	0.0031	0.0041	0.0054	0.0029	0.0075	0.0081	0.01	0.0084	0.0038	0.0038	0.0065	0.0078	0.0066	0.0065	0.017	0.004	0.0053	0	0	0	0.0047	0.0037	0	0.0031	0.0014	0.004	0.002	0.0038	0.0038	0	0	0.0019	0.008	0.0033	0.0044	0.0049	0	0.0016	0	0	0.0057	0.0039	0.004	0.0053	0.0061	0.0039	0.0058	0.0031	0.0086
N-Acetylneuraminate	0.027	0.024	0.033	0.015	0.016	0.019	0.019	0.017	0.034	0.026	0.021	0.044	0.019	0.03	0.15	0.064	0.01	0	0	0	0.023	0.021	0.022	0.019	0.009	0.014	0.016	0.018	0.015	0.0081	0.017	0.021	0	0	0	0	0	0	0	0	0.039	0.047	0.023	0.031	0.049	0.041	0.03	0.019	0.046
Ribulose 1,5-diphosphate	0	0	0	0	0	0	0	0	0	0	0	0	0	0	0	0	0	0.0031	0	0.0014	0	0	0	0	0	0	0	0	0	0	0	0	0	0	0	0	0	0	0	0	0	0	0	0	0	0	0	0	0
CMP	0	0	0	0	0.0019	0.0012	0	0.0017	0.0013	0.0015	0	0	0	0	0.0083	0	0.0018	0	0	0.0022	0	0.0024	0.0025	0.0018	0.0018	0.0032	0.0027	0.0027	0	0	0	0.0018	0.0043	0.0018	0.0042	0.0024	0	0	0	0	0.0018	0	0.0014	0.0013	0.0024	0	0.0022	0.0016	0
UMP	0	0.0094	0.004	0.0046	0.005	0.0062	0.0055	0.0056	0.0033	0.0032	0.0036	0.0031	0.0041	0.018	0.084	0.019	0.0023	0	0	0.0052	0.024	0.034	0.033	0.032	0.02	0.032	0.035	0.042	0.017	0.011	0.022	0.02	0.039	0.0092	0.031	0.024	0	0.0015	0	0	0.013	0.019	0.017	0.01	0.021	0.016	0.0091	0.016	0.0066
F1,6P	0.0035	0.005	0.0074	0.0015	0.0016	0.0021	0.0014	0.0026	0.0021	0	0	0	0	0	0.037	0.012	0.0014	0.025	0.018	0.026	0.004	0.037	0.01	0.0025	0.0019	0.0036	0	0	0.023	0.006	0.005	0.029	0	0	0.005	0	0.018	0.011	0.021	0.05	0.007	0.018	0.052	0.007	0.0077	0.0055	0.0066	0.0048	0.0037
AMP	0.023	0.08	0.04	0.059	0.032	0.075	0.07	0.035	0.015	0.025	0.023	0.02	0.02	0.06	0.34	0.2	0.0078	0.0081	0.0047	0.013	0.41	0.57	0.57	0.48	0.31	0.51	0.46	0.6	0.28	0.12	0.42	0.42	0.83	0.21	0.52	0.38	0.0054	0.014	0.012	0.011	0.31	0.38	0.37	0.25	0.4	0.39	0.23	0.29	0.18
3'-AMP	0	0	0	0	0	0	0	0	0	0	0.0016	0	0	0	0	0	0	0	0	0	0	0	0	0	0	0	0	0	0	0	0	0	0	0	0	0	0	0	0	0	0	0	0	0	0	0	0	0	0
IMP	0	0	0.0028	0.0024	0.0037	0	0.0026	0	0.0028	0	0.0031	0	0.0036	0.012	0.023	0.058	0.48	0.21	0.016	0.84	0.018	0.024	0.031	0.022	0.013	0.022	0.019	0.036	0.013	0.0067	0.025	0.018	0.082	0.036	0.074	0.046	0.036	0.0052	0.014	0.015	0.017	0.019	0.022	0.019	0.013	0.0089	0.009	0.0061	0.0069
GMP	0.0057	0.027	0.016	0.02	0.024	0.021	0.024	0.018	0.0089	0.012	0.0071	0.012	0.0062	0.0072	0.038	0.0092	0.017	0	0	0	0.069	0.1	0.094	0.073	0.053	0.094	0.093	0.12	0.04	0.021	0.064	0.066	0.1	0.028	0.068	0.052	0	0.0023	0	0	0.069	0.065	0.06	0.061	0.084	0.089	0.054	0.047	0.035
CoA	0	0	0	0	0	0	0	0	0	0	0	0	0	0	0	0	0	0	0	0	0	0	0	0	0	0	0	0	0	0	0	0	0.021	0	0.013	0	0	0	0	0	0	0	0	0	0	0	0	0	0
PRPP	0	0	0	0	0	0	0	0	0	0	0	0	0	0	0	0	0	0.0043	0	0.0064	0	0	0	0	0	0	0	0	0	0	0	0	0	0	0	0	0	0	0	0	0	0	0	0	0	0	0	0	0
CDP	0	0	0	0	0	0	0	0	0	0	0	0	0	0	0.0017	0	0	0	0	0	0	0	0	0	0	0	0	0	0	0	0	0	0	0	0.0017	0	0	0	0	0	0	0	0	0	0	0	0	0	0
UDP	0	0	0	0	0	0	0	0	0	0	0	0	0	0.0031	0.013	0.012	0	0.0019	0	0.0046	0.0025	0.002	0.0024	0.0021	0.0013	0.0019	0.0028	0.0027	0.0032	0	0	0.0019	0.0073	0.0035	0.0086	0.0035	0	0.0019	0.003	0	0	0.0044	0.0032	0	0.0031	0	0.003	0.0015	0
Acetyl CoA	0	0	0	0	0	0	0	0	0	0	0	0	0	0	0.00059	0.0025	0	0	0	0	0	0	0	0	0	0	0	0	0	0	0	0	0	0	0.0025	0.00081	0	0	0	0.0015	0	0	0.00079	0	0	0	0	0	0
Trehalose 6-phosphate	0	0	0	0	0	0	0	0	0	0.0022	0	0	0	0	0	0	0	0	0	0	0	0.0036	0.0046	0.0025	0.0021	0.0063	0.018	0.0072	0	0	0	0	0	0	0	0	0	0	0	0	0.0079	0.01	0.012	0.012	0.01	0.018	0.012	0.0074	0
ADP	0	0.0083	0.01	0.013	0.01	0.013	0.012	0.0094	0.0055	0.0034	0.0039	0.0072	0.013	0.015	0.055	0.19	0.11	0.17	0.2	0.26	0.037	0.042	0.051	0.038	0.028	0.04	0.049	0.05	0.044	0.02	0.037	0.054	0.12	0.056	0.12	0.048	0.1	0.1	0.27	0.25	0.037	0.1	0.081	0.024	0.07	0.026	0.036	0.025	0.02
GDP	0	0	0.015	0.015	0.0079	0	0.0073	0.007	0	0	0	0	0	0	0.02	0.012	0	0	0	0	0.02	0.03	0.036	0.017	0.012	0.03	0.023	0.024	0.017	0.0094	0.024	0.021	0.017	0.013	0.022	0.0064	0	0.0024	0.0052	0.005	0.034	0.033	0.038	0.03	0.03	0.018	0.014	0.013	0.015
Adenylosuccinate	0	0	0	0	0	0	0	0	0	0	0	0	0	0	0.019	0.012	0	0	0	0	0	0.0025	0	0	0	0.0055	0.0054	0.0048	0.0028	0	0	0	0	0	0	0	0	0	0	0	0	0	0	0	0	0	0	0	0
Glycocholate	0	0	0	0	0	0.0012	0.0031	0	0	0	0	0	0.015	0	0	0	0.0026	0	0	0	0	0	0	0	0	0	0	0	0	0	0	0	0	0.0063	0	0.0032	0.016	0.0014	0	0	0	0	0	0	0	0	0	0	0
CTP	0	0	0	0	0	0	0	0	0	0	0	0	0	0	0	0	0	0	0.0072	0.0083	0	0	0	0	0	0	0	0	0	0	0	0	0	0	0	0	0.005	0.0051	0.019	0.013	0	0	0	0	0	0	0	0	0
UTP	0	0	0	0	0	0	0	0	0	0	0	0	0	0	0	0	0	0	0	0	0	0	0	0	0	0	0	0	0	0	0	0	0	0	0	0	0.013	0.014	0.047	0.032	0	0	0	0	0	0	0	0	0
dGTP	0	0	0	0.0043	0.0054	0.0019	0.0062	0.0068	0	0	0	0	0.011	0.013	0.033	0.28	0.0044	0.51	0	0	0.0049	0.01	0.011	0.0044	0.0049	0.02	0	0.025	0.017	0.016	0.014	0.025	0.048	0.062	0.055	0	0	0	0	0	0	0	0	0	0	0	0	0	0
ATP	0	0	0	0	0	0	0	0	0	0	0	0	0	0	0	0	0	0	1.8	1.8	0	0	0	0	0	0	0.026	0	0	0	0	0	0	0	0	0.017	1.1	1.2	3.8	2.8	0.01	0.021	0.028	0.0052	0.022	0.0043	0.0069	0.0057	0.006
Taurocholate	0	0	0	0	0	0	0	0	0	0	0	0	0	0	0	0	0	0	0	0	0	0	0	0	0	0	0	0	0	0	0	0	0	0.021	0	0.012	0.047	0.0046	0	0.0011	0	0	0	0	0	0	0	0	0
GTP	0	0	0.015	0.014	0	0	0	0	0	0	0	0	0	0	0.012	0.028	0	0.035	0.058	0.072	0.015	0.021	0.024	0.011	0	0.026	0.03	0.022	0.015	0	0	0.02	0.01	0	0.014	0	0.028	0.036	0.1	0.1	0.021	0.034	0.043	0.018	0.029	0	0	0	0
CDP-choline	0.0088	0.017	0	0.008	0	0.02	0.011	0	0	0.0045	0	0	0.0074	0	0.016	0.025	0.02	0	0	0.018	0.013	0.023	0.014	0.012	0.0085	0.017	0.022	0.024	0.011	0	0.013	0.014	0.038	0.0092	0.029	0.023	0	0	0.021	0	0.022	0.026	0.014	0.018	0.022	0.035	0.029	0.017	0.018
ADP-ribose	0	0	0	0	0	0	0	0	0	0	0	0	0	0	0	0	0	0	0	0	0	0	0	0	0	0	0	0	0	0	0	0	0	0	0	0	0	0	0	0	0.012	0.011	0	0.004	0.0055	0	0.01	0.0045	0.012
UDP-glucose	0	0	0.0094	0	0	0.0084	0	0	0	0	0	0	0	0.0094	0.014	0.052	0	0.0031	0	0	0.018	0.02	0.031	0.022	0.019	0.033	0.03	0.037	0.015	0	0.017	0.017	0.053	0.019	0.038	0.024	0.003	0.0064	0.009	0.0067	0.014	0.029	0.013	0.0088	0.022	0.018	0.014	0.021	0.01
UDP-glucuronate	0	0	0.0024	0	0	0	0	0	0	0	0	0	0	0	0.0024	0.026	0	0	0	0	0	0.0026	0	0	0	0.0031	0.0036	0.0039	0	0	0	0.0029	0.0062	0.0035	0.011	0.0046	0	0.0017	0	0	0.0026	0.0045	0.0028	0.0029	0.0026	0.0029	0	0.0018	0
ADP-glucose	0	0	0	0	0	0	0	0	0	0	0	0	0	0	0	0.003	0	0	0	0	0	0	0	0	0.0019	0	0.0035	0.005	0.0019	0	0	0	0	0	0.0023	0	0	0	0	0	0	0	0	0.0047	0	0.0033	0	0.0029	0
GDP-mannose	0	0.0033	0.0064	0	0	0	0	0	0	0	0	0	0	0	0.0073	0.026	0	0	0	0	0.0076	0.01	0	0.0078	0	0.0074	0.01	0.012	0.0066	0	0.0069	0.01	0	0	0.0039	0	0	0	0	0	0.0084	0.015	0.0079	0.0068	0.0082	0.0082	0	0.0091	0.0048
UDP-N-acetylglucosamine	0.017	0.024	0.011	0.01	0.013	0.025	0.024	0.015	0.01	0.007	0.0064	0.015	0.028	0.053	0.087	0.19	0.0032	0.0065	0.01	0.01	0.032	0.041	0.037	0.039	0.029	0.058	0.051	0.065	0.024	0.014	0.033	0.037	0.17	0.053	0.13	0.1	0.0072	0.018	0.015	0.011	0.038	0.051	0.041	0.035	0.056	0.056	0.041	0.034	0.03
CMP-N-acetylneuraminate	0	0.0037	0.005	0	0.0043	0	0	0	0.003	0	0	0	0	0.0075	0.023	0.015	0	0	0.0038	0	0.0053	0.0059	0.0043	0.0048	0.0034	0.0079	0.0065	0.0077	0	0	0	0.0061	0	0	0	0	0	0.0015	0	0	0.0081	0.0093	0.0056	0.0072	0.01	0.012	0.01	0.0063	0.0062
NAD+	0.017	0.022	0.019	0.025	0.013	0.02	0.019	0	0	0	0	0	0.019	0.041	0.081	0.11	0.013	0.037	0.086	0.088	0.089	0.12	0.1	0.1	0.053	0.1	0.091	0.12	0.074	0.037	0.089	0.1	0.24	0.08	0.21	0.1	0.1	0.1	0.23	0.2	0.075	0.063	0.088	0.084	0.063	0.046	0.028	0.046	0.056
NADH	0.018	0.017	0	0.013	0.011	0	0.021	0.016	0	0	0	0.019	0.013	0.0045	0.0088	0.0073	0	0	0	0	0.016	0.014	0.019	0	0.0093	0.021	0.018	0.022	0.005	0	0	0.012	0.021	0	0.012	0	0	0	0	0	0.011	0.01	0.014	0.02	0.014	0.023	0	0.005	0
NADP+	0	0	0	0	0	0	0	0	0	0	0	0	0	0	0.0051	0.011	0	0	0	0	0	0.0058	0.0065	0.0049	0.002	0.0051	0.0042	0.0068	0.0041	0	0	0.0049	0.047	0.021	0.042	0.022	0.0031	0.0028	0.0068	0.0056	0.0053	0.0054	0.0055	0.0031	0.0043	0	0	0.0027	0
FAD	0	0	0	0	0	0	0	0	0	0	0	0	0	0	0	0	0	0	0	0	0	0	0	0	0	0	0	0	0	0	0	0	0.023	0	0.021	0.014	0	0	0	0	0	0	0	0	0	0	0	0	0
[truncated: 11 more columns]
