# Supplementary material for: Reduced purine biosynthesis in humans after their divergence from Neandertals
Source: eLife. 2021 May 4;10:e58741. doi: 10.7554/eLife.58741 (PMC8133780; doi:10.7554/eLife.58741)
Supplement: Supplementary file 2. — The table includes adjusted p-values and fold-change values for human-chimpanzee and human-macaque comparisons. [file elife-58741-supp2.xlsx]

## Sheet: T2
Supplementary Table 2. Metabolites showing significantly higher intensity in the human cerebellum compared to chimpanzees and rhesus macaques.
pval.adj - t-test P values corrected for multiple testing (adjusted P values) for human-chimpanzee and human-rhesus comparisons
FC - fold-change. The fold change values are shown as the ratio of mean intensity value in humans to that in a non-human primate for metabolites with higher intensity in humans and as the ratio of a non-human primate to human intensities for those with lower intensity in humans.
chimp. - chimpanzee
	pval.adj.chimp	pval.adj.rhesus	FC.chimp	FC.rhesus
Gly	0.00313636	0.00282059	3.77622	4.15385
Ala	0.00181509	0.00282059	3.01676	3.35404
Ser	0.0145205	0.0132314	4.63218	3.44444
Pro	0.0068418	0.00721828	8.8412	11.3812
Val	0.00216046	0.00395642	6.56863	13.7671
Thr	0.00507975	0.00721828	8.42105	8.12698
Ile	0.00474901	0.0063763	7.30769	16.0563
Leu	0.0020528	0.0036355	7.74603	17.6812
Asn	0.00474901	0.00282059	2.75093	4
Ornithine	0.0224237	0.0152674	5.12015	15.3039
Lys	0.00313636	0.00372516	3.5	7.72242
Met	0.00727855	0.00721828	8.5	12.7628
His	0.0129975	0.00721828	4.0678	6.42857
Methionine sulfoxide	0.00216046	0.0036355	11.7619	6.5
Arg	0.0068418	0.00721828	5.13986	12.1488
Tyr	0.0068418	0.00446019	4.23387	8.75
Trp	0.0020528	0.00282059	3.23636	6.44928
Cysteine-glutathione disulphide -Divalent	0.0414211	0.0299303	6.48526	28.0392
1-Methyladenosine	0.0129975	0.00828572	6.33333	16.1852
5-Oxoproline	0.038016	0.049278	3.24415	2.44332
N-Acetylglucosamine 6-phosphate	0.021414	0.00721828	2.61084	4.14062
N-Acetylglucosamine 1-phosphate	0.0219763	0.0036355	1.79894	3.03571
