# Supplementary material for: Reduced purine biosynthesis in humans after their divergence from Neandertals
Source: eLife. 2021 May 4;10:e58741. doi: 10.7554/eLife.58741 (PMC8133780; doi:10.7554/eLife.58741)
Supplement: Supplementary file 3. — The table includes pathway names, adjusted and nominal p-values, number of differential metabolites, and number of associated genes. Top pathways (corrected enrichment p-value<0.05) are shaded in green. Tables include multiple worksheets – one for each tissue. [file elife-58741-supp3.xlsx]

## Sheet: T2
Supplementary Table 3. Metabolites showing significantly significantly lower intensity in the human prefrontal cortex compared to chimpanzees and rhesus macaques.
pval.adj - t-test P values corrected for multiple testing (adjusted P values) for human-chimpanzee and human-rhesus comparisons
FC - fold-change. The fold change values are shown as the ratio of mean intensity value in humans to that in a non-human primate for metabolites with higher intensity in humans and as the ratio of a non-human primate to human intensities for those with lower intensity in humans.
chimp. - chimpanzee
	pval.adj.chimp	pval.adj.rhesus	FC.chimp	FC.rhesus
AMP	0.0165269	0.00930109	6.48515	10.0495
IMP	0.000992765	0.0186708	14.8077	18.2692
GMP	0.0160902	0.00930109	3.71179	4.89083
UDP-N-acetylglucosamine	0.0202197	0.0186708	2.66129	2.40323
NAD+	0.0165269	0.00930109	3.73494	4.92771
