# Supplementary material for: Reduced purine biosynthesis in humans after their divergence from Neandertals
Source: eLife. 2021 May 4;10:e58741. doi: 10.7554/eLife.58741 (PMC8133780; doi:10.7554/eLife.58741)
Supplement: Supplementary file 4. — The table includes adjusted p-values and fold-change values for human-chimpanzee and human-macaque comparisons. [file elife-58741-supp4.xlsx]

## Sheet: PFC
Supplementary Table 4. Pathway enrichment in metabolites showing higher intensity in human tissues compared to chimpanzees and rhesus macaques.
path.id - pathway KEGG ID
path.name - pathway name
p.adjust - P values corrected for multiple testing
p.val - nominal P values
numb.mets - number of differential metabolites within a pathway
numb.genes - number of genes associated with differetial metabolites
Table includes multiple worksheets – one for each tissue
path.id	path.name	p.adjust	p.val	numb.mets	numb.genes
hsa00970	Aminoacyl-tRNA biosynthesis	2.44327e-23	1.72061e-25	16	32
hsa00260	Glycine, serine and threonine metabolism	9.15303e-11	1.28916e-12	5	21
hsa00330	Arginine and proline metabolism	7.45385e-10	1.57476e-11	6	25
hsa00270	Cysteine and methionine metabolism	1.6193e-06	4.5614e-08	3	16
hsa00430	Taurine and hypotaurine metabolism	1.00565e-05	3.541e-07	1	8
hsa00400	Phenylalanine, tyrosine and tryptophan biosynthesis	0.000236632	9.99855e-06	2	5
hsa00340	Histidine metabolism	0.00456341	0.000224957	1	10
hsa00360	Phenylalanine metabolism	0.0205632	0.00115849	2	7
hsa00290	Valine, leucine and isoleucine biosynthesis	0.160086	0.0101463	3	2
hsa00520	Amino sugar and nucleotide sugar metabolism	0.262781	0.0185057	2	10
hsa00350	Tyrosine metabolism	0.475214	0.0368123	1	8
hsa00240	Pyrimidine metabolism	0.976251	0.0825001	1	15
hsa00982	Drug metabolism - cytochrome P450	1	1	0	0
hsa04662	B cell receptor signaling pathway	1	1	0	0
hsa04660	T cell receptor signaling pathway	1	1	0	0
hsa04370	VEGF signaling pathway	1	1	0	0
hsa04012	ErbB signaling pathway	1	1	0	0
hsa04062	Chemokine signaling pathway	1	1	0	0
hsa04973	Carbohydrate digestion and absorption	1	1	0	0
hsa04151	PI3K-Akt signaling pathway	1	1	0	0
hsa04510	Focal adhesion	1	1	0	0
hsa04722	Neurotrophin signaling pathway	1	1	0	0
hsa04666	Fc gamma R-mediated phagocytosis	1	1	0	0
hsa04810	Regulation of actin cytoskeleton	1	1	0	0
hsa04650	Natural killer cell mediated cytotoxicity	1	1	0	0
hsa04910	Insulin signaling pathway	1	1	0	0
hsa04150	mTOR signaling pathway	1	1	0	0
hsa04664	Fc epsilon RI signaling pathway	1	1	0	0
hsa04070	Phosphatidylinositol signaling system	1	1	0	0
hsa04960	Aldosterone-regulated sodium reabsorption	1	1	0	0
hsa00562	Inositol phosphate metabolism	1	1	0	0
hsa00980	Metabolism of xenobiotics by cytochrome P450	1	1	0	0
hsa00030	Pentose phosphate pathway	1	0.311299	1	4
hsa00010	Glycolysis / Gluconeogenesis	1	1	0	0
hsa00120	Primary bile acid biosynthesis	1	0.837617	2	1
hsa00140	Steroid hormone biosynthesis	1	1	0	0
hsa00230	Purine metabolism	1	0.964846	2	11
hsa00061	Fatty acid biosynthesis	1	1	0	0
hsa04080	Neuroactive ligand-receptor interaction	1	1	2	4
hsa00600	Sphingolipid metabolism	1	0.859634	1	3
hsa00592	alpha-Linolenic acid metabolism	1	1	0	0
hsa04010	MAPK signaling pathway	1	1	0	0
hsa04066	HIF-1 signaling pathway	1	1	0	0
hsa00590	Arachidonic acid metabolism	1	1	0	0
hsa03320	PPAR signaling pathway	1	1	0	0
hsa00480	Glutathione metabolism	1	0.392725	3	6
hsa00860	Porphyrin and chlorophyll metabolism	1	0.942069	1	2
hsa00380	Tryptophan metabolism	1	0.101155	1	7
hsa00130	Ubiquinone and other terpenoid-quinone biosynthesis	1	0.656012	1	1
hsa00983	Drug metabolism - other enzymes	1	1	0	0
hsa00785	Lipoic acid metabolism	1	1	0	0
hsa00565	Ether lipid metabolism	1	1	0	0
hsa00740	Riboflavin metabolism	1	1	0	0
hsa00472	D-Arginine and D-ornithine metabolism	1	1	0	0
hsa04020	Calcium signaling pathway	1	1	0	0
hsa04728	Dopaminergic synapse	1	1	0	0
hsa04540	Gap junction	1	1	0	0
hsa04730	Long-term depression	1	1	0	0
hsa04726	Serotonergic synapse	1	1	0	0
hsa04723	Retrograde endocannabinoid signaling	1	1	0	0
hsa04270	Vascular smooth muscle contraction	1	1	0	0
hsa04971	Gastric acid secretion	1	1	0	0
hsa04724	Glutamatergic synapse	1	1	0	0
hsa04720	Long-term potentiation	1	1	0	0
hsa04725	Cholinergic synapse	1	1	0	0
hsa04970	Salivary secretion	1	1	0	0
hsa04916	Melanogenesis	1	1	0	0
hsa04713	Circadian entrainment	1	1	0	0
hsa04972	Pancreatic secretion	1	1	0	0
hsa04961	Endocrine and other factor-regulated calcium reabsorption	1	1	0	0
hsa04912	GnRH signaling pathway	1	1	0	0
hsa04920	Adipocytokine signaling pathway	1	1	0	0
hsa04975	Fat digestion and absorption	1	1	0	0
hsa01040	Biosynthesis of unsaturated fatty acids	1	1	0	0
hsa00564	Glycerophospholipid metabolism	1	0.803548	2	7
hsa00053	Ascorbate and aldarate metabolism	1	1	0	0
hsa04744	Phototransduction	1	1	0	0
hsa00830	Retinol metabolism	1	1	0	0
hsa00650	Butanoate metabolism	1	0.80797	1	2
hsa00071	Fatty acid degradation	1	1	0	0
hsa00310	Lysine degradation	1	0.96633	2	2
hsa00052	Galactose metabolism	1	1	0	0
hsa00780	Biotin metabolism	1	0.273492	1	1
hsa00450	Selenocompound metabolism	1	0.837617	1	1
hsa00460	Cyanoamino acid metabolism	1	0.151844	2	2
hsa00790	Folate biosynthesis	1	1	0	0
hsa00040	Pentose and glucuronate interconversions	1	1	0	0
hsa00900	Terpenoid backbone biosynthesis	1	1	0	0
hsa00770	Pantothenate and CoA biosynthesis	1	0.524569	1	2
hsa00640	Propanoate metabolism	1	0.215807	1	5
hsa00510	N-Glycan biosynthesis	1	1	0	0
hsa00062	Fatty acid elongation	1	1	0	0
hsa00020	Citrate cycle (TCA cycle)	1	1	0	0
hsa00250	Alanine, aspartate and glutamate metabolism	1	0.215807	2	5
hsa00471	D-Glutamine and D-glutamate metabolism	1	1	0	0
hsa00630	Glyoxylate and dicarboxylate metabolism	1	0.218339	2	4
hsa00561	Glycerolipid metabolism	1	1	0	0
hsa00232	Caffeine metabolism	1	1	0	0
hsa00920	Sulfur metabolism	1	1	0	0
hsa00051	Fructose and mannose metabolism	1	1	0	0
hsa00410	beta-Alanine metabolism	1	0.80797	1	2
hsa04140	Autophagy - animal	1	1	0	0
hsa00730	Thiamine metabolism	1	0.346968	1	1
hsa00760	Nicotinate and nicotinamide metabolism	1	0.128937	1	5
hsa00563	Glycosylphosphatidylinositol (GPI)-anchor biosynthesis	1	1	0	0
hsa00100	Steroid biosynthesis	1	1	0	0
hsa04976	Bile secretion	1	1	0	0
hsa00500	Starch and sucrose metabolism	1	1	0	0
hsa00512	Mucin type O-glycan biosynthesis	1	1	0	0
hsa00532	Glycosaminoglycan biosynthesis - chondroitin sulfate / dermatan sulfate	1	1	0	0
hsa04930	Type II diabetes mellitus	1	1	0	0
hsa00620	Pyruvate metabolism	1	1	0	0
hsa00280	Valine, leucine and isoleucine degradation	1	0.83799	3	3
hsa00670	One carbon pool by folate	1	1	0	0
hsa00750	Vitamin B6 metabolism	1	1	0	0
hsa04978	Mineral absorption	1	1	0	0
hsa05014	Amyotrophic lateral sclerosis (ALS)	1	1	0	0
hsa00591	Linoleic acid metabolism	1	1	0	0
hsa04310	Wnt signaling pathway	1	1	0	0
hsa05016	Huntington's disease	1	1	0	0
hsa04360	Axon guidance	1	1	0	0
hsa04380	Osteoclast differentiation	1	1	0	0
hsa04114	Oocyte meiosis	1	1	0	0
hsa04260	Cardiac muscle contraction	1	1	0	0
hsa05010	Alzheimer's disease	1	1	0	0
hsa04742	Taste transduction	1	1	0	0
hsa04710	Circadian rhythm	1	1	0	0
hsa04721	Synaptic vesicle cycle	1	1	0	0
hsa04964	Proximal tubule bicarbonate reclamation	1	1	0	0
hsa00300	Lysine biosynthesis	1	1	0	0
hsa04914	Progesterone-mediated oocyte maturation	1	1	0	0
hsa04610	Complement and coagulation cascades	1	1	0	0
hsa00524	Neomycin, kanamycin and gentamicin biosynthesis	1	1	0	0
hsa04340	Hedgehog signaling pathway	1	1	0	0
hsa00072	Synthesis and degradation of ketone bodies	1	0.228329	1	2
hsa04974	Protein digestion and absorption	1	1	0	0
hsa04977	Vitamin digestion and absorption	1	1	0	0
hsa04740	Olfactory transduction	1	1	0	0
hsa04727	GABAergic synapse	1	1	0	0
hsa04962	Vasopressin-regulated water reabsorption	1	1	0	0
hsa00190	Oxidative phosphorylation	1	1	0	0
hsa00531	Glycosaminoglycan degradation	1	1	0	0

## Sheet: VC
path.id - pathway KEGG ID
path.name - pathway name
p.adjust - P values corrected for multiple testing
p.val - nominal P values
numb.mets - number of differential metabolites within a pathway
numb.genes - number of genes associated with differetial metabolites
Table includes multiple worksheets – one for each tissue
path.id	path.name	p.adjust	p.val	numb.mets	numb.genes
hsa00970	Aminoacyl-tRNA biosynthesis	6.99518e-26	4.92619e-28	18	36
hsa00260	Glycine, serine and threonine metabolism	2.42674e-15	3.41794e-17	7	27
hsa00330	Arginine and proline metabolism	1.10798e-10	2.3408e-12	7	29
hsa00020	Citrate cycle (TCA cycle)	3.98272e-09	1.12189e-10	5	19
hsa00340	Histidine metabolism	5.86286e-05	2.06439e-06	3	14
hsa00250	Alanine, aspartate and glutamate metabolism	5.88183e-05	2.48528e-06	4	15
hsa00400	Phenylalanine, tyrosine and tryptophan biosynthesis	0.000729934	3.59827e-05	2	5
hsa00770	Pantothenate and CoA biosynthesis	0.00155149	8.74077e-05	3	9
hsa00270	Cysteine and methionine metabolism	0.00366486	0.00023228	5	13
hsa00360	Phenylalanine metabolism	0.0733494	0.00516545	2	7
hsa00630	Glyoxylate and dicarboxylate metabolism	0.10681	0.00827404	6	8
hsa00290	Valine, leucine and isoleucine biosynthesis	0.199659	0.0168726	3	2
hsa00010	Glycolysis / Gluconeogenesis	0.767464	0.0702608	2	13
hsa00730	Thiamine metabolism	0.858482	0.084639	2	2
hsa00982	Drug metabolism - cytochrome P450	1	1	0	0
hsa04662	B cell receptor signaling pathway	1	1	0	0
hsa04660	T cell receptor signaling pathway	1	1	0	0
hsa04370	VEGF signaling pathway	1	1	0	0
hsa04012	ErbB signaling pathway	1	1	0	0
hsa04062	Chemokine signaling pathway	1	1	0	0
hsa04973	Carbohydrate digestion and absorption	1	1	0	0
hsa04151	PI3K-Akt signaling pathway	1	1	0	0
hsa04510	Focal adhesion	1	1	0	0
hsa04722	Neurotrophin signaling pathway	1	1	0	0
hsa04666	Fc gamma R-mediated phagocytosis	1	1	0	0
hsa04810	Regulation of actin cytoskeleton	1	1	0	0
hsa04650	Natural killer cell mediated cytotoxicity	1	1	0	0
hsa04910	Insulin signaling pathway	1	1	0	0
hsa04150	mTOR signaling pathway	1	1	0	0
hsa04664	Fc epsilon RI signaling pathway	1	1	0	0
hsa04070	Phosphatidylinositol signaling system	1	1	0	0
hsa04960	Aldosterone-regulated sodium reabsorption	1	1	0	0
hsa00562	Inositol phosphate metabolism	1	1	0	0
hsa00980	Metabolism of xenobiotics by cytochrome P450	1	1	0	0
hsa00030	Pentose phosphate pathway	1	1	0	0
hsa00120	Primary bile acid biosynthesis	1	0.907546	1	1
hsa00140	Steroid hormone biosynthesis	1	1	0	0
hsa00230	Purine metabolism	1	1	1	3
hsa00240	Pyrimidine metabolism	1	1	0	0
hsa00061	Fatty acid biosynthesis	1	1	0	0
hsa04080	Neuroactive ligand-receptor interaction	1	0.334708	3	34
hsa00600	Sphingolipid metabolism	1	0.951079	1	3
hsa00592	alpha-Linolenic acid metabolism	1	1	0	0
hsa04010	MAPK signaling pathway	1	1	0	0
hsa04066	HIF-1 signaling pathway	1	1	0	0
hsa00590	Arachidonic acid metabolism	1	1	0	0
hsa03320	PPAR signaling pathway	1	1	0	0
hsa00480	Glutathione metabolism	1	0.193526	5	9
hsa00860	Porphyrin and chlorophyll metabolism	1	0.982403	1	2
hsa00380	Tryptophan metabolism	1	0.257812	1	7
hsa00130	Ubiquinone and other terpenoid-quinone biosynthesis	1	0.75285	1	1
hsa00983	Drug metabolism - other enzymes	1	1	0	0
hsa00785	Lipoic acid metabolism	1	1	0	0
hsa00565	Ether lipid metabolism	1	1	0	0
hsa00740	Riboflavin metabolism	1	1	0	0
hsa00520	Amino sugar and nucleotide sugar metabolism	1	0.280787	2	8
hsa00472	D-Arginine and D-ornithine metabolism	1	1	0	0
hsa04020	Calcium signaling pathway	1	1	0	0
hsa04728	Dopaminergic synapse	1	1	0	0
hsa04540	Gap junction	1	1	0	0
hsa04730	Long-term depression	1	1	0	0
hsa04726	Serotonergic synapse	1	1	0	0
hsa04723	Retrograde endocannabinoid signaling	1	1	0	0
hsa04270	Vascular smooth muscle contraction	1	1	0	0
hsa04971	Gastric acid secretion	1	0.995277	1	1
hsa04724	Glutamatergic synapse	1	1	0	0
hsa04720	Long-term potentiation	1	1	0	0
hsa04725	Cholinergic synapse	1	1	0	0
hsa04970	Salivary secretion	1	1	0	0
hsa04916	Melanogenesis	1	1	0	0
hsa04713	Circadian entrainment	1	1	0	0
hsa04972	Pancreatic secretion	1	1	0	0
hsa04961	Endocrine and other factor-regulated calcium reabsorption	1	1	0	0
hsa04912	GnRH signaling pathway	1	1	0	0
hsa04920	Adipocytokine signaling pathway	1	1	0	0
hsa04975	Fat digestion and absorption	1	1	0	0
hsa01040	Biosynthesis of unsaturated fatty acids	1	1	0	0
hsa00564	Glycerophospholipid metabolism	1	0.953845	2	7
hsa00053	Ascorbate and aldarate metabolism	1	1	0	0
hsa04744	Phototransduction	1	1	0	0
hsa00830	Retinol metabolism	1	1	0	0
hsa00650	Butanoate metabolism	1	0.749122	2	3
hsa00071	Fatty acid degradation	1	1	0	0
hsa00310	Lysine degradation	1	0.99902	1	1
hsa00052	Galactose metabolism	1	1	0	0
hsa00780	Biotin metabolism	1	0.341951	1	1
hsa00450	Selenocompound metabolism	1	0.907546	1	1
hsa00460	Cyanoamino acid metabolism	1	0.228336	2	2
hsa00790	Folate biosynthesis	1	1	0	0
hsa00040	Pentose and glucuronate interconversions	1	1	0	0
hsa00900	Terpenoid backbone biosynthesis	1	1	0	0
hsa00640	Propanoate metabolism	1	0.807414	1	3
hsa00510	N-Glycan biosynthesis	1	1	0	0
hsa00062	Fatty acid elongation	1	1	0	0
hsa00471	D-Glutamine and D-glutamate metabolism	1	1	0	0
hsa00561	Glycerolipid metabolism	1	0.999522	1	1
hsa00232	Caffeine metabolism	1	1	0	0
hsa00920	Sulfur metabolism	1	1	0	0
hsa00051	Fructose and mannose metabolism	1	1	0	0
hsa00410	beta-Alanine metabolism	1	0.533392	2	4
hsa00350	Tyrosine metabolism	1	0.124156	1	8
hsa04140	Autophagy - animal	1	1	0	0
hsa00760	Nicotinate and nicotinamide metabolism	1	0.269206	1	5
hsa00563	Glycosylphosphatidylinositol (GPI)-anchor biosynthesis	1	1	0	0
hsa00100	Steroid biosynthesis	1	1	0	0
hsa04976	Bile secretion	1	1	0	0
hsa00500	Starch and sucrose metabolism	1	1	0	0
hsa00430	Taurine and hypotaurine metabolism	1	0.75285	1	1
hsa00512	Mucin type O-glycan biosynthesis	1	1	0	0
hsa00532	Glycosaminoglycan biosynthesis - chondroitin sulfate / dermatan sulfate	1	1	0	0
hsa04930	Type II diabetes mellitus	1	1	0	0
hsa00620	Pyruvate metabolism	1	0.279165	1	7
hsa00280	Valine, leucine and isoleucine degradation	1	0.939825	3	3
hsa00670	One carbon pool by folate	1	1	0	0
hsa00750	Vitamin B6 metabolism	1	1	0	0
hsa04978	Mineral absorption	1	1	0	0
hsa05014	Amyotrophic lateral sclerosis (ALS)	1	1	0	0
hsa00591	Linoleic acid metabolism	1	1	0	0
hsa04310	Wnt signaling pathway	1	1	0	0
hsa05016	Huntington's disease	1	1	0	0
hsa04360	Axon guidance	1	1	0	0
hsa04380	Osteoclast differentiation	1	1	0	0
hsa04114	Oocyte meiosis	1	1	0	0
hsa04260	Cardiac muscle contraction	1	1	0	0
hsa05010	Alzheimer's disease	1	1	0	0
hsa04742	Taste transduction	1	1	0	0
hsa04710	Circadian rhythm	1	1	0	0
hsa04721	Synaptic vesicle cycle	1	1	0	0
hsa04964	Proximal tubule bicarbonate reclamation	1	1	0	0
hsa00300	Lysine biosynthesis	1	1	0	0
hsa04914	Progesterone-mediated oocyte maturation	1	1	0	0
hsa04610	Complement and coagulation cascades	1	1	0	0
hsa00524	Neomycin, kanamycin and gentamicin biosynthesis	1	1	0	0
hsa04340	Hedgehog signaling pathway	1	1	0	0
hsa00072	Synthesis and degradation of ketone bodies	1	0.330945	1	2
hsa04974	Protein digestion and absorption	1	1	0	0
hsa04977	Vitamin digestion and absorption	1	1	0	0
hsa04740	Olfactory transduction	1	1	0	0
hsa04727	GABAergic synapse	1	1	0	0
hsa04962	Vasopressin-regulated water reabsorption	1	1	0	0
hsa00190	Oxidative phosphorylation	1	1	0	0
hsa00531	Glycosaminoglycan degradation	1	1	0	0

## Sheet: CB
path.id - pathway KEGG ID
path.name - pathway name
p.adjust - P values corrected for multiple testing
p.val - nominal P values
numb.mets - number of differential metabolites within a pathway
numb.genes - number of genes associated with differetial metabolites
Table includes multiple worksheets – one for each tissue
path.id	path.name	p.adjust	p.val	numb.mets	numb.genes
hsa00970	Aminoacyl-tRNA biosynthesis	8.00141e-24	5.6348e-26	17	34
hsa00260	Glycine, serine and threonine metabolism	5.93562e-15	8.36003e-17	5	26
hsa00330	Arginine and proline metabolism	4.11777e-08	8.6995e-10	9	25
hsa00250	Alanine, aspartate and glutamate metabolism	4.25375e-06	1.19824e-07	4	16
hsa00270	Cysteine and methionine metabolism	1.64122e-05	5.77893e-07	3	16
hsa00430	Taurine and hypotaurine metabolism	3.38141e-05	1.42876e-06	1	8
hsa00400	Phenylalanine, tyrosine and tryptophan biosynthesis	0.000431775	2.43253e-05	2	5
hsa00524	Neomycin, kanamycin and gentamicin biosynthesis	0.000431775	2.43253e-05	1	5
hsa00340	Histidine metabolism	0.000572888	3.63098e-05	2	12
hsa00360	Phenylalanine metabolism	0.0468816	0.00330152	2	7
hsa00290	Valine, leucine and isoleucine biosynthesis	0.186426	0.0144414	3	2
hsa00350	Tyrosine metabolism	0.441895	0.0373433	2	9
hsa00982	Drug metabolism - cytochrome P450	1	1	0	0
hsa04662	B cell receptor signaling pathway	1	1	0	0
hsa04660	T cell receptor signaling pathway	1	1	0	0
hsa04370	VEGF signaling pathway	1	1	0	0
hsa04012	ErbB signaling pathway	1	1	0	0
hsa04062	Chemokine signaling pathway	1	1	0	0
hsa04973	Carbohydrate digestion and absorption	1	1	0	0
hsa04151	PI3K-Akt signaling pathway	1	1	0	0
hsa04510	Focal adhesion	1	1	0	0
hsa04722	Neurotrophin signaling pathway	1	1	0	0
hsa04666	Fc gamma R-mediated phagocytosis	1	1	0	0
hsa04810	Regulation of actin cytoskeleton	1	1	0	0
hsa04650	Natural killer cell mediated cytotoxicity	1	1	0	0
hsa04910	Insulin signaling pathway	1	1	0	0
hsa04150	mTOR signaling pathway	1	1	0	0
hsa04664	Fc epsilon RI signaling pathway	1	1	0	0
hsa04070	Phosphatidylinositol signaling system	1	1	0	0
hsa04960	Aldosterone-regulated sodium reabsorption	1	1	0	0
hsa00562	Inositol phosphate metabolism	1	0.999653	1	1
hsa00980	Metabolism of xenobiotics by cytochrome P450	1	1	0	0
hsa00030	Pentose phosphate pathway	1	0.440966	1	4
hsa00010	Glycolysis / Gluconeogenesis	1	0.149791	2	11
hsa00120	Primary bile acid biosynthesis	1	0.888219	2	1
hsa00140	Steroid hormone biosynthesis	1	1	0	0
hsa00230	Purine metabolism	1	1	2	4
hsa00240	Pyrimidine metabolism	1	1	0	0
hsa00061	Fatty acid biosynthesis	1	1	0	0
hsa04080	Neuroactive ligand-receptor interaction	1	0.46171	3	30
hsa00600	Sphingolipid metabolism	1	0.929461	1	3
hsa00592	alpha-Linolenic acid metabolism	1	1	0	0
hsa04010	MAPK signaling pathway	1	1	0	0
hsa04066	HIF-1 signaling pathway	1	1	0	0
hsa00590	Arachidonic acid metabolism	1	1	0	0
hsa03320	PPAR signaling pathway	1	1	0	0
hsa00480	Glutathione metabolism	1	0.570277	3	6
hsa00860	Porphyrin and chlorophyll metabolism	1	0.973559	1	2
hsa00380	Tryptophan metabolism	1	0.198261	1	7
hsa00130	Ubiquinone and other terpenoid-quinone biosynthesis	1	0.723719	1	1
hsa00983	Drug metabolism - other enzymes	1	1	0	0
hsa00785	Lipoic acid metabolism	1	1	0	0
hsa00565	Ether lipid metabolism	1	1	0	0
hsa00740	Riboflavin metabolism	1	1	0	0
hsa00520	Amino sugar and nucleotide sugar metabolism	1	0.528196	2	6
hsa00472	D-Arginine and D-ornithine metabolism	1	1	0	0
hsa04020	Calcium signaling pathway	1	1	0	0
hsa04728	Dopaminergic synapse	1	1	0	0
hsa04540	Gap junction	1	1	0	0
hsa04730	Long-term depression	1	1	0	0
hsa04726	Serotonergic synapse	1	1	0	0
hsa04723	Retrograde endocannabinoid signaling	1	1	0	0
hsa04270	Vascular smooth muscle contraction	1	1	0	0
hsa04971	Gastric acid secretion	1	1	0	0
hsa04724	Glutamatergic synapse	1	1	0	0
hsa04720	Long-term potentiation	1	1	0	0
hsa04725	Cholinergic synapse	1	1	0	0
hsa04970	Salivary secretion	1	1	0	0
hsa04916	Melanogenesis	1	1	0	0
hsa04713	Circadian entrainment	1	1	0	0
hsa04972	Pancreatic secretion	1	1	0	0
hsa04961	Endocrine and other factor-regulated calcium reabsorption	1	1	0	0
hsa04912	GnRH signaling pathway	1	1	0	0
hsa04920	Adipocytokine signaling pathway	1	1	0	0
hsa04975	Fat digestion and absorption	1	1	0	0
hsa01040	Biosynthesis of unsaturated fatty acids	1	1	0	0
hsa00564	Glycerophospholipid metabolism	1	0.922168	2	7
hsa00053	Ascorbate and aldarate metabolism	1	1	0	0
hsa04744	Phototransduction	1	1	0	0
hsa00830	Retinol metabolism	1	1	0	0
hsa00650	Butanoate metabolism	1	0.881609	1	2
hsa00071	Fatty acid degradation	1	1	0	0
hsa00310	Lysine degradation	1	0.986526	2	2
hsa00052	Galactose metabolism	1	1	0	0
hsa00780	Biotin metabolism	1	0.319632	1	1
hsa00450	Selenocompound metabolism	1	0.888219	1	1
hsa00460	Cyanoamino acid metabolism	1	0.202117	2	2
hsa00790	Folate biosynthesis	1	1	0	0
hsa00040	Pentose and glucuronate interconversions	1	1	0	0
hsa00900	Terpenoid backbone biosynthesis	1	1	0	0
hsa00770	Pantothenate and CoA biosynthesis	1	0.625502	1	2
hsa00640	Propanoate metabolism	1	0.339833	1	5
hsa00510	N-Glycan biosynthesis	1	1	0	0
hsa00062	Fatty acid elongation	1	1	0	0
hsa00020	Citrate cycle (TCA cycle)	1	0.289863	1	5
hsa00471	D-Glutamine and D-glutamate metabolism	1	1	0	0
hsa00630	Glyoxylate and dicarboxylate metabolism	1	0.153202	3	5
hsa00561	Glycerolipid metabolism	1	0.999121	1	1
hsa00232	Caffeine metabolism	1	1	0	0
hsa00920	Sulfur metabolism	1	1	0	0
hsa00051	Fructose and mannose metabolism	1	1	0	0
hsa00410	beta-Alanine metabolism	1	0.469058	2	4
hsa04140	Autophagy - animal	1	1	0	0
hsa00730	Thiamine metabolism	1	0.401688	1	1
hsa00760	Nicotinate and nicotinamide metabolism	1	0.218119	1	5
hsa00563	Glycosylphosphatidylinositol (GPI)-anchor biosynthesis	1	1	0	0
hsa00100	Steroid biosynthesis	1	1	0	0
hsa04976	Bile secretion	1	1	0	0
hsa00500	Starch and sucrose metabolism	1	1	0	0
hsa00512	Mucin type O-glycan biosynthesis	1	1	0	0
hsa00532	Glycosaminoglycan biosynthesis - chondroitin sulfate / dermatan sulfate	1	1	0	0
hsa04930	Type II diabetes mellitus	1	1	0	0
hsa00620	Pyruvate metabolism	1	0.56083	1	5
hsa00280	Valine, leucine and isoleucine degradation	1	0.915093	3	3
hsa00670	One carbon pool by folate	1	1	0	0
hsa00750	Vitamin B6 metabolism	1	1	0	0
hsa04978	Mineral absorption	1	1	0	0
hsa05014	Amyotrophic lateral sclerosis (ALS)	1	1	0	0
hsa00591	Linoleic acid metabolism	1	1	0	0
hsa04310	Wnt signaling pathway	1	1	0	0
hsa05016	Huntington's disease	1	1	0	0
hsa04360	Axon guidance	1	1	0	0
hsa04380	Osteoclast differentiation	1	1	0	0
hsa04114	Oocyte meiosis	1	1	0	0
hsa04260	Cardiac muscle contraction	1	1	0	0
hsa05010	Alzheimer's disease	1	1	0	0
hsa04742	Taste transduction	1	1	0	0
hsa04710	Circadian rhythm	1	1	0	0
hsa04721	Synaptic vesicle cycle	1	1	0	0
hsa04964	Proximal tubule bicarbonate reclamation	1	1	0	0
hsa00300	Lysine biosynthesis	1	1	0	0
hsa04914	Progesterone-mediated oocyte maturation	1	1	0	0
hsa04610	Complement and coagulation cascades	1	1	0	0
hsa04340	Hedgehog signaling pathway	1	1	0	0
hsa00072	Synthesis and degradation of ketone bodies	1	0.29653	1	2
hsa04974	Protein digestion and absorption	1	1	0	0
hsa04977	Vitamin digestion and absorption	1	1	0	0
hsa04740	Olfactory transduction	1	1	0	0
hsa04727	GABAergic synapse	1	1	0	0
hsa04962	Vasopressin-regulated water reabsorption	1	1	0	0
hsa00190	Oxidative phosphorylation	1	1	0	0
hsa00531	Glycosaminoglycan degradation	1	1	0	0

## Sheet: muscle
path.id - pathway KEGG ID
path.name - pathway name
p.adjust - P values corrected for multiple testing
p.val - nominal P values
numb.mets - number of differential metabolites within a pathway
numb.genes - number of genes associated with differetial metabolites
Table includes multiple worksheets – one for each tissue
path.id	path.name	p.adjust	p.val	numb.mets	numb.genes
hsa00250	Alanine, aspartate and glutamate metabolism	5.28495e-12	3.7218e-14	6	25
hsa00330	Arginine and proline metabolism	1.94139e-11	2.73436e-13	8	34
hsa00970	Aminoacyl-tRNA biosynthesis	9.07997e-08	1.9183e-09	13	24
hsa04727	GABAergic synapse	1.90623e-07	5.36965e-09	1	21
hsa04080	Neuroactive ligand-receptor interaction	9.67919e-06	3.40817e-07	5	71
hsa00240	Pyrimidine metabolism	1.17143e-05	4.94972e-07	3	38
hsa00260	Glycine, serine and threonine metabolism	3.33443e-05	1.64373e-06	4	19
hsa00430	Taurine and hypotaurine metabolism	0.000415736	2.34217e-05	1	8
hsa00270	Cysteine and methionine metabolism	0.00114049	7.22848e-05	3	16
hsa00524	Neomycin, kanamycin and gentamicin biosynthesis	0.00209751	0.000147712	1	5
hsa00340	Histidine metabolism	0.0157436	0.00121958	2	12
hsa00290	Valine, leucine and isoleucine biosynthesis	0.323233	0.0295917	3	2
hsa00300	Lysine biosynthesis	0.323233	0.0295917	1	2
hsa04724	Glutamatergic synapse	0.488975	0.0482088	1	13
hsa00982	Drug metabolism - cytochrome P450	1	1	0	0
hsa04662	B cell receptor signaling pathway	1	1	0	0
hsa04660	T cell receptor signaling pathway	1	1	0	0
hsa04370	VEGF signaling pathway	1	1	0	0
hsa04012	ErbB signaling pathway	1	1	0	0
hsa04062	Chemokine signaling pathway	1	1	0	0
hsa04973	Carbohydrate digestion and absorption	1	1	0	0
hsa04151	PI3K-Akt signaling pathway	1	1	0	0
hsa04510	Focal adhesion	1	1	0	0
hsa04722	Neurotrophin signaling pathway	1	1	0	0
hsa04666	Fc gamma R-mediated phagocytosis	1	1	0	0
hsa04810	Regulation of actin cytoskeleton	1	1	0	0
hsa04650	Natural killer cell mediated cytotoxicity	1	1	0	0
hsa04910	Insulin signaling pathway	1	1	0	0
hsa04150	mTOR signaling pathway	1	1	0	0
hsa04664	Fc epsilon RI signaling pathway	1	1	0	0
hsa04070	Phosphatidylinositol signaling system	1	1	0	0
hsa04960	Aldosterone-regulated sodium reabsorption	1	1	0	0
hsa00562	Inositol phosphate metabolism	1	0.999992	1	1
hsa00980	Metabolism of xenobiotics by cytochrome P450	1	1	0	0
hsa00030	Pentose phosphate pathway	1	0.737073	1	4
hsa00010	Glycolysis / Gluconeogenesis	1	0.949085	2	7
hsa00120	Primary bile acid biosynthesis	1	0.960405	2	1
hsa00140	Steroid hormone biosynthesis	1	1	0	0
hsa00230	Purine metabolism	1	0.286948	6	32
hsa00061	Fatty acid biosynthesis	1	1	0	0
hsa00600	Sphingolipid metabolism	1	0.991344	1	3
hsa00592	alpha-Linolenic acid metabolism	1	1	0	0
hsa04010	MAPK signaling pathway	1	1	0	0
hsa04066	HIF-1 signaling pathway	1	1	0	0
hsa00590	Arachidonic acid metabolism	1	1	0	0
hsa03320	PPAR signaling pathway	1	1	0	0
hsa00480	Glutathione metabolism	1	0.88554	3	6
hsa00860	Porphyrin and chlorophyll metabolism	1	0.997287	1	2
hsa00380	Tryptophan metabolism	1	1	0	0
hsa00130	Ubiquinone and other terpenoid-quinone biosynthesis	1	1	0	0
hsa00983	Drug metabolism - other enzymes	1	1	0	0
hsa00785	Lipoic acid metabolism	1	1	0	0
hsa00565	Ether lipid metabolism	1	1	0	0
hsa00740	Riboflavin metabolism	1	1	0	0
hsa00520	Amino sugar and nucleotide sugar metabolism	1	0.602241	2	8
hsa00472	D-Arginine and D-ornithine metabolism	1	1	0	0
hsa04020	Calcium signaling pathway	1	1	0	0
hsa04728	Dopaminergic synapse	1	1	0	0
hsa04540	Gap junction	1	1	0	0
hsa04730	Long-term depression	1	1	0	0
hsa04726	Serotonergic synapse	1	1	0	0
hsa04723	Retrograde endocannabinoid signaling	1	1	0	0
hsa04270	Vascular smooth muscle contraction	1	1	0	0
hsa04971	Gastric acid secretion	1	1	0	0
hsa04720	Long-term potentiation	1	1	0	0
hsa04725	Cholinergic synapse	1	1	0	0
hsa04970	Salivary secretion	1	1	0	0
hsa04916	Melanogenesis	1	1	0	0
hsa04713	Circadian entrainment	1	1	0	0
hsa04972	Pancreatic secretion	1	1	0	0
hsa04961	Endocrine and other factor-regulated calcium reabsorption	1	1	0	0
hsa04912	GnRH signaling pathway	1	1	0	0
hsa04920	Adipocytokine signaling pathway	1	1	0	0
hsa04975	Fat digestion and absorption	1	1	0	0
hsa01040	Biosynthesis of unsaturated fatty acids	1	1	0	0
hsa00564	Glycerophospholipid metabolism	1	0.978696	2	9
hsa00053	Ascorbate and aldarate metabolism	1	1	0	0
hsa04744	Phototransduction	1	1	0	0
hsa00830	Retinol metabolism	1	1	0	0
hsa00650	Butanoate metabolism	1	0.576598	2	5
hsa00071	Fatty acid degradation	1	1	0	0
hsa00310	Lysine degradation	1	0.979591	3	4
hsa00052	Galactose metabolism	1	0.679593	1	4
hsa00780	Biotin metabolism	1	0.433034	1	1
hsa00450	Selenocompound metabolism	1	0.960405	1	1
hsa00460	Cyanoamino acid metabolism	1	0.345922	2	2
hsa00790	Folate biosynthesis	1	1	0	0
hsa00040	Pentose and glucuronate interconversions	1	0.949181	2	3
hsa00360	Phenylalanine metabolism	1	1	0	0
hsa00900	Terpenoid backbone biosynthesis	1	1	0	0
hsa00770	Pantothenate and CoA biosynthesis	1	0.81886	1	2
hsa00640	Propanoate metabolism	1	1	0	0
hsa00510	N-Glycan biosynthesis	1	1	0	0
hsa00062	Fatty acid elongation	1	1	0	0
hsa00020	Citrate cycle (TCA cycle)	1	0.608764	1	5
hsa00471	D-Glutamine and D-glutamate metabolism	1	0.139585	1	2
hsa00630	Glyoxylate and dicarboxylate metabolism	1	0.399275	3	5
hsa00561	Glycerolipid metabolism	1	1	0	0
hsa00232	Caffeine metabolism	1	1	0	0
hsa00920	Sulfur metabolism	1	1	0	0
hsa00051	Fructose and mannose metabolism	1	1	0	0
hsa00410	beta-Alanine metabolism	1	0.762749	2	4
hsa00350	Tyrosine metabolism	1	0.999423	1	1
hsa04140	Autophagy - animal	1	1	0	0
hsa00730	Thiamine metabolism	1	1	0	0
hsa00400	Phenylalanine, tyrosine and tryptophan biosynthesis	1	1	0	0
hsa00760	Nicotinate and nicotinamide metabolism	1	0.508416	1	5
hsa00563	Glycosylphosphatidylinositol (GPI)-anchor biosynthesis	1	1	0	0
hsa00100	Steroid biosynthesis	1	1	0	0
hsa04976	Bile secretion	1	1	0	0
hsa00500	Starch and sucrose metabolism	1	0.625073	1	9
hsa00512	Mucin type O-glycan biosynthesis	1	1	0	0
hsa00532	Glycosaminoglycan biosynthesis - chondroitin sulfate / dermatan sulfate	1	1	0	0
hsa04930	Type II diabetes mellitus	1	1	0	0
hsa00620	Pyruvate metabolism	1	0.860398	1	5
hsa00280	Valine, leucine and isoleucine degradation	1	0.960098	3	4
hsa00670	One carbon pool by folate	1	1	0	0
hsa00750	Vitamin B6 metabolism	1	1	0	0
hsa04978	Mineral absorption	1	1	0	0
hsa05014	Amyotrophic lateral sclerosis (ALS)	1	1	0	0
hsa00591	Linoleic acid metabolism	1	1	0	0
hsa04310	Wnt signaling pathway	1	1	0	0
hsa05016	Huntington's disease	1	1	0	0
hsa04360	Axon guidance	1	1	0	0
hsa04380	Osteoclast differentiation	1	1	0	0
hsa04114	Oocyte meiosis	1	1	0	0
hsa04260	Cardiac muscle contraction	1	1	0	0
hsa05010	Alzheimer's disease	1	1	0	0
hsa04742	Taste transduction	1	1	0	0
hsa04710	Circadian rhythm	1	1	0	0
hsa04721	Synaptic vesicle cycle	1	1	0	0
hsa04964	Proximal tubule bicarbonate reclamation	1	1	0	0
hsa04914	Progesterone-mediated oocyte maturation	1	1	0	0
hsa04610	Complement and coagulation cascades	1	1	0	0
hsa04340	Hedgehog signaling pathway	1	1	0	0
hsa00072	Synthesis and degradation of ketone bodies	1	0.476236	1	2
hsa04974	Protein digestion and absorption	1	1	0	0
hsa04977	Vitamin digestion and absorption	1	1	0	0
hsa04740	Olfactory transduction	1	1	0	0
hsa04962	Vasopressin-regulated water reabsorption	1	1	0	0
hsa00190	Oxidative phosphorylation	1	1	0	0
hsa00531	Glycosaminoglycan degradation	1	1	0	0

## Sheet: kidney
path.id - pathway KEGG ID
path.name - pathway name
p.adjust - P values corrected for multiple testing
p.val - nominal P values
numb.mets - number of differential metabolites within a pathway
numb.genes - number of genes associated with differetial metabolites
Table includes multiple worksheets – one for each tissue
path.id	path.name	p.adjust	p.val	numb.mets	numb.genes
hsa00053	Ascorbate and aldarate metabolism	9.78014e-10	1.37135e-11	1	20
hsa00500	Starch and sucrose metabolism	9.78014e-10	1.37748e-11	2	30
hsa00040	Pentose and glucuronate interconversions	3.0266e-08	8.52563e-10	2	21
hsa04727	GABAergic synapse	3.0266e-08	8.52563e-10	1	21
hsa04080	Neuroactive ligand-receptor interaction	3.17543e-07	1.11811e-08	5	70
hsa00240	Pyrimidine metabolism	7.96111e-07	3.36385e-08	4	38
hsa00250	Alanine, aspartate and glutamate metabolism	1.54235e-05	7.97449e-07	5	17
hsa00410	beta-Alanine metabolism	1.54235e-05	8.68927e-07	1	16
hsa00330	Arginine and proline metabolism	1.67443e-05	1.06126e-06	4	24
hsa00970	Aminoacyl-tRNA biosynthesis	3.73902e-05	2.63311e-06	9	19
hsa00400	Phenylalanine, tyrosine and tryptophan biosynthesis	0.0010819	9.14278e-05	1	5
hsa00524	Neomycin, kanamycin and gentamicin biosynthesis	0.0010819	9.14278e-05	1	5
hsa00360	Phenylalanine metabolism	0.15752	0.0144209	1	7
hsa04724	Glutamatergic synapse	0.231444	0.023846	1	13
hsa00290	Valine, leucine and isoleucine biosynthesis	0.231444	0.0244483	3	2
hsa00520	Amino sugar and nucleotide sugar metabolism	0.250639	0.028241	4	13
hsa00020	Citrate cycle (TCA cycle)	0.287508	0.03442	3	9
hsa04725	Cholinergic synapse	0.298649	0.0378569	1	11
hsa00471	D-Glutamine and D-glutamate metabolism	0.881999	0.118014	1	2
hsa00982	Drug metabolism - cytochrome P450	1	1	0	0
hsa04662	B cell receptor signaling pathway	1	1	0	0
hsa04660	T cell receptor signaling pathway	1	1	0	0
hsa04370	VEGF signaling pathway	1	1	0	0
hsa04012	ErbB signaling pathway	1	1	0	0
hsa04062	Chemokine signaling pathway	1	1	0	0
hsa04973	Carbohydrate digestion and absorption	1	1	0	0
hsa04151	PI3K-Akt signaling pathway	1	1	0	0
hsa04510	Focal adhesion	1	1	0	0
hsa04722	Neurotrophin signaling pathway	1	1	0	0
hsa04666	Fc gamma R-mediated phagocytosis	1	1	0	0
hsa04810	Regulation of actin cytoskeleton	1	1	0	0
hsa04650	Natural killer cell mediated cytotoxicity	1	1	0	0
hsa04910	Insulin signaling pathway	1	1	0	0
hsa04150	mTOR signaling pathway	1	1	0	0
hsa04664	Fc epsilon RI signaling pathway	1	1	0	0
hsa04070	Phosphatidylinositol signaling system	1	1	0	0
hsa04960	Aldosterone-regulated sodium reabsorption	1	1	0	0
hsa00562	Inositol phosphate metabolism	1	0.999974	1	1
hsa00980	Metabolism of xenobiotics by cytochrome P450	1	1	0	0
hsa00030	Pentose phosphate pathway	1	0.452318	1	5
hsa00010	Glycolysis / Gluconeogenesis	1	0.904727	2	7
hsa00120	Primary bile acid biosynthesis	1	0.945459	1	1
hsa00140	Steroid hormone biosynthesis	1	1	0	0
hsa00230	Purine metabolism	1	1	2	5
hsa00270	Cysteine and methionine metabolism	1	1	0	0
hsa00061	Fatty acid biosynthesis	1	1	0	0
hsa00600	Sphingolipid metabolism	1	1	0	0
hsa00592	alpha-Linolenic acid metabolism	1	1	0	0
hsa04010	MAPK signaling pathway	1	1	0	0
hsa04066	HIF-1 signaling pathway	1	1	0	0
hsa00590	Arachidonic acid metabolism	1	1	0	0
hsa03320	PPAR signaling pathway	1	1	0	0
hsa00480	Glutathione metabolism	1	0.534544	1	8
hsa00860	Porphyrin and chlorophyll metabolism	1	1	0	0
hsa00380	Tryptophan metabolism	1	0.614318	1	6
hsa00130	Ubiquinone and other terpenoid-quinone biosynthesis	1	1	0	0
hsa00983	Drug metabolism - other enzymes	1	1	0	0
hsa00785	Lipoic acid metabolism	1	1	0	0
hsa00565	Ether lipid metabolism	1	1	0	0
hsa00740	Riboflavin metabolism	1	1	0	0
hsa00472	D-Arginine and D-ornithine metabolism	1	1	0	0
hsa04020	Calcium signaling pathway	1	1	0	0
hsa04728	Dopaminergic synapse	1	1	0	0
hsa04540	Gap junction	1	1	0	0
hsa04730	Long-term depression	1	1	0	0
hsa04726	Serotonergic synapse	1	1	0	0
hsa04723	Retrograde endocannabinoid signaling	1	1	0	0
hsa04270	Vascular smooth muscle contraction	1	1	0	0
hsa04971	Gastric acid secretion	1	0.988152	2	2
hsa04720	Long-term potentiation	1	1	0	0
hsa04970	Salivary secretion	1	0.999789	1	1
hsa04916	Melanogenesis	1	1	0	0
hsa04713	Circadian entrainment	1	1	0	0
hsa04972	Pancreatic secretion	1	0.995913	1	1
hsa04961	Endocrine and other factor-regulated calcium reabsorption	1	1	0	0
hsa04912	GnRH signaling pathway	1	1	0	0
hsa04920	Adipocytokine signaling pathway	1	1	0	0
hsa04975	Fat digestion and absorption	1	1	0	0
hsa01040	Biosynthesis of unsaturated fatty acids	1	1	0	0
hsa00564	Glycerophospholipid metabolism	1	0.990654	2	7
hsa04744	Phototransduction	1	1	0	0
hsa00830	Retinol metabolism	1	1	0	0
hsa00650	Butanoate metabolism	1	0.29574	3	6
hsa00071	Fatty acid degradation	1	1	0	0
hsa00310	Lysine degradation	1	1	0	0
hsa00052	Galactose metabolism	1	0.599312	1	4
hsa00780	Biotin metabolism	1	1	0	0
hsa00450	Selenocompound metabolism	1	0.945459	1	1
hsa00460	Cyanoamino acid metabolism	1	1	0	0
hsa00790	Folate biosynthesis	1	1	0	0
hsa00340	Histidine metabolism	1	0.660359	1	4
hsa00900	Terpenoid backbone biosynthesis	1	1	0	0
hsa00770	Pantothenate and CoA biosynthesis	1	0.511606	2	3
hsa00640	Propanoate metabolism	1	0.385432	2	6
hsa00510	N-Glycan biosynthesis	1	0.269811	1	4
hsa00062	Fatty acid elongation	1	1	0	0
hsa00260	Glycine, serine and threonine metabolism	1	0.356627	3	7
hsa00630	Glyoxylate and dicarboxylate metabolism	1	0.53217	4	4
hsa00561	Glycerolipid metabolism	1	1	0	0
hsa00232	Caffeine metabolism	1	1	0	0
hsa00920	Sulfur metabolism	1	1	0	0
hsa00051	Fructose and mannose metabolism	1	0.937849	1	3
hsa00350	Tyrosine metabolism	1	1	0	0
hsa04140	Autophagy - animal	1	1	0	0
hsa00730	Thiamine metabolism	1	1	0	0
hsa00760	Nicotinate and nicotinamide metabolism	1	1	0	0
hsa00563	Glycosylphosphatidylinositol (GPI)-anchor biosynthesis	1	1	0	0
hsa00100	Steroid biosynthesis	1	1	0	0
hsa04976	Bile secretion	1	0.923086	1	1
hsa00430	Taurine and hypotaurine metabolism	1	1	0	0
hsa00512	Mucin type O-glycan biosynthesis	1	1	0	0
hsa00532	Glycosaminoglycan biosynthesis - chondroitin sulfate / dermatan sulfate	1	1	0	0
hsa04930	Type II diabetes mellitus	1	1	0	0
hsa00620	Pyruvate metabolism	1	0.79379	1	5
hsa00280	Valine, leucine and isoleucine degradation	1	0.977883	3	3
hsa00670	One carbon pool by folate	1	1	0	0
hsa00750	Vitamin B6 metabolism	1	1	0	0
hsa04978	Mineral absorption	1	1	0	0
hsa05014	Amyotrophic lateral sclerosis (ALS)	1	1	0	0
hsa00591	Linoleic acid metabolism	1	1	0	0
hsa04310	Wnt signaling pathway	1	1	0	0
hsa05016	Huntington's disease	1	1	0	0
hsa04360	Axon guidance	1	1	0	0
hsa04380	Osteoclast differentiation	1	1	0	0
hsa04114	Oocyte meiosis	1	1	0	0
hsa04260	Cardiac muscle contraction	1	1	0	0
hsa05010	Alzheimer's disease	1	1	0	0
hsa04742	Taste transduction	1	1	0	0
hsa04710	Circadian rhythm	1	1	0	0
hsa04721	Synaptic vesicle cycle	1	1	0	0
hsa04964	Proximal tubule bicarbonate reclamation	1	1	0	0
hsa00300	Lysine biosynthesis	1	1	0	0
hsa04914	Progesterone-mediated oocyte maturation	1	1	0	0
hsa04610	Complement and coagulation cascades	1	1	0	0
hsa04340	Hedgehog signaling pathway	1	1	0	0
hsa00072	Synthesis and degradation of ketone bodies	1	0.423436	1	2
hsa04974	Protein digestion and absorption	1	1	0	0
hsa04977	Vitamin digestion and absorption	1	1	0	0
hsa04740	Olfactory transduction	1	1	0	0
hsa04962	Vasopressin-regulated water reabsorption	1	1	0	0
hsa00190	Oxidative phosphorylation	1	1	0	0
hsa00531	Glycosaminoglycan degradation	1	1	0	0
