# Supplementary material for: Reduced purine biosynthesis in humans after their divergence from Neandertals
Source: eLife. 2021 May 4;10:e58741. doi: 10.7554/eLife.58741 (PMC8133780; doi:10.7554/eLife.58741)
Supplement: Supplementary file 5. — The table includes names, adjusted and nominal p-values, number of differential metabolites, and number of associated genes. Top pathways (corrected enrichment p-value<0.05) are shaded in green. Tables include multiple worksheets – one for each tissue. [file elife-58741-supp5.xlsx]

## Sheet: PFC
Supplementary Table 5. Pathway enrichment in metabolites showing lower intensity in human tissues compared to chimpanzees and rhesus macaques.
path.id - pathway KEGG ID
path.name - pathway name
p.adjust - P values corrected for multiple testing
p.val - nominal P values
numb.mets - number of differential metabolites within a pathway
numb.genes - number of genes associated with differetial metabolites
Table includes multiple worksheets – one for each tissue
path.id	path.name	p.adjust	p.val	numb.mets	numb.genes
hsa00230	Purine metabolism	2.26253e-56	1.59333e-58	10	136
hsa00190	Oxidative phosphorylation	5.75895e-28	8.1112e-30	1	47
hsa00480	Glutathione metabolism	8.1437e-15	1.7205e-16	5	40
hsa04724	Glutamatergic synapse	2.37087e-13	6.67849e-15	2	37
hsa00053	Ascorbate and aldarate metabolism	2.55269e-06	9.46163e-08	2	20
hsa00500	Starch and sucrose metabolism	2.55269e-06	1.0786e-07	3	32
hsa00040	Pentose and glucuronate interconversions	3.04066e-06	1.49892e-07	4	23
hsa00330	Arginine and proline metabolism	0.000306831	1.72862e-05	9	29
hsa00250	Alanine, aspartate and glutamate metabolism	0.0021977	0.000139291	4	18
hsa00524	Neomycin, kanamycin and gentamicin biosynthesis	0.0136435	0.000960808	1	5
hsa00471	D-Glutamine and D-glutamate metabolism	0.0499369	0.00386835	2	4
hsa00750	Vitamin B6 metabolism	0.0541208	0.00457359	2	5
hsa00520	Amino sugar and nucleotide sugar metabolism	0.386797	0.035411	7	18
hsa00760	Nicotinate and nicotinamide metabolism	0.522137	0.0514783	1	11
hsa00300	Lysine biosynthesis	0.590708	0.0623987	1	2
hsa04964	Proximal tubule bicarbonate reclamation	0.622868	0.0701823	1	4
hsa00982	Drug metabolism - cytochrome P450	1	1	0	0
hsa04662	B cell receptor signaling pathway	1	1	0	0
hsa04660	T cell receptor signaling pathway	1	1	0	0
hsa04370	VEGF signaling pathway	1	1	0	0
hsa04012	ErbB signaling pathway	1	1	0	0
hsa04062	Chemokine signaling pathway	1	1	0	0
hsa04973	Carbohydrate digestion and absorption	1	1	0	0
hsa04151	PI3K-Akt signaling pathway	1	0.920662	1	2
hsa04510	Focal adhesion	1	1	0	0
hsa04722	Neurotrophin signaling pathway	1	1	0	0
hsa04666	Fc gamma R-mediated phagocytosis	1	1	0	0
hsa04810	Regulation of actin cytoskeleton	1	1	0	0
hsa04650	Natural killer cell mediated cytotoxicity	1	1	0	0
hsa04910	Insulin signaling pathway	1	1	0	0
hsa04150	mTOR signaling pathway	1	0.842498	1	2
hsa04664	Fc epsilon RI signaling pathway	1	1	0	0
hsa04070	Phosphatidylinositol signaling system	1	1	0	0
hsa04960	Aldosterone-regulated sodium reabsorption	1	1	0	0
hsa00562	Inositol phosphate metabolism	1	1	1	1
hsa00980	Metabolism of xenobiotics by cytochrome P450	1	1	0	0
hsa00030	Pentose phosphate pathway	1	0.946165	1	4
hsa00010	Glycolysis / Gluconeogenesis	1	1	1	2
hsa00120	Primary bile acid biosynthesis	1	1	0	0
hsa00140	Steroid hormone biosynthesis	1	1	0	0
hsa00270	Cysteine and methionine metabolism	1	0.372953	2	10
hsa00240	Pyrimidine metabolism	1	0.586442	3	25
hsa00061	Fatty acid biosynthesis	1	1	0	0
hsa04080	Neuroactive ligand-receptor interaction	1	0.973817	3	49
hsa00600	Sphingolipid metabolism	1	0.999999	1	1
hsa00592	alpha-Linolenic acid metabolism	1	1	0	0
hsa04010	MAPK signaling pathway	1	1	0	0
hsa04066	HIF-1 signaling pathway	1	1	0	0
hsa00590	Arachidonic acid metabolism	1	1	0	0
hsa03320	PPAR signaling pathway	1	1	0	0
hsa00860	Porphyrin and chlorophyll metabolism	1	0.999943	1	2
hsa00380	Tryptophan metabolism	1	1	0	0
hsa00130	Ubiquinone and other terpenoid-quinone biosynthesis	1	1	0	0
hsa00983	Drug metabolism - other enzymes	1	1	0	0
hsa00785	Lipoic acid metabolism	1	1	0	0
hsa00565	Ether lipid metabolism	1	1	0	0
hsa00740	Riboflavin metabolism	1	1	0	0
hsa00472	D-Arginine and D-ornithine metabolism	1	1	0	0
hsa04020	Calcium signaling pathway	1	1	1	2
hsa04728	Dopaminergic synapse	1	1	0	0
hsa04540	Gap junction	1	0.999712	1	2
hsa04730	Long-term depression	1	0.888411	1	6
hsa04726	Serotonergic synapse	1	1	0	0
hsa04723	Retrograde endocannabinoid signaling	1	0.799539	1	6
hsa04270	Vascular smooth muscle contraction	1	1	1	2
hsa04971	Gastric acid secretion	1	1	0	0
hsa04720	Long-term potentiation	1	0.446746	1	9
hsa04725	Cholinergic synapse	1	1	0	0
hsa04970	Salivary secretion	1	1	0	0
hsa04916	Melanogenesis	1	1	0	0
hsa04713	Circadian entrainment	1	0.972903	1	9
hsa04972	Pancreatic secretion	1	1	0	0
hsa04961	Endocrine and other factor-regulated calcium reabsorption	1	1	0	0
hsa04912	GnRH signaling pathway	1	1	0	0
hsa04920	Adipocytokine signaling pathway	1	1	0	0
hsa04975	Fat digestion and absorption	1	1	0	0
hsa01040	Biosynthesis of unsaturated fatty acids	1	1	0	0
hsa00564	Glycerophospholipid metabolism	1	0.346637	4	24
hsa04744	Phototransduction	1	1	0	0
hsa00830	Retinol metabolism	1	1	0	0
hsa00650	Butanoate metabolism	1	0.987237	2	3
hsa00071	Fatty acid degradation	1	1	0	0
hsa00310	Lysine degradation	1	0.898514	3	9
hsa00052	Galactose metabolism	1	0.817508	2	5
hsa00780	Biotin metabolism	1	1	0	0
hsa00450	Selenocompound metabolism	1	1	0	0
hsa00970	Aminoacyl-tRNA biosynthesis	1	0.999277	2	3
hsa00460	Cyanoamino acid metabolism	1	1	0	0
hsa00790	Folate biosynthesis	1	0.899908	1	2
hsa00340	Histidine metabolism	1	0.399927	3	8
hsa00360	Phenylalanine metabolism	1	1	0	0
hsa00900	Terpenoid backbone biosynthesis	1	1	0	0
hsa00770	Pantothenate and CoA biosynthesis	1	1	0	0
hsa00640	Propanoate metabolism	1	1	0	0
hsa00510	N-Glycan biosynthesis	1	0.647941	1	4
hsa00062	Fatty acid elongation	1	1	0	0
hsa00020	Citrate cycle (TCA cycle)	1	0.325442	2	9
hsa00260	Glycine, serine and threonine metabolism	1	0.99807	2	3
hsa00630	Glyoxylate and dicarboxylate metabolism	1	0.886551	3	4
hsa00561	Glycerolipid metabolism	1	0.997102	1	6
hsa00232	Caffeine metabolism	1	1	0	0
hsa00920	Sulfur metabolism	1	1	0	0
hsa00051	Fructose and mannose metabolism	1	0.997542	1	3
hsa00410	beta-Alanine metabolism	1	0.886569	3	5
hsa00350	Tyrosine metabolism	1	0.999988	1	1
hsa04140	Autophagy - animal	1	1	0	0
hsa00730	Thiamine metabolism	1	1	0	0
hsa00400	Phenylalanine, tyrosine and tryptophan biosynthesis	1	1	0	0
hsa00563	Glycosylphosphatidylinositol (GPI)-anchor biosynthesis	1	1	0	0
hsa00100	Steroid biosynthesis	1	1	0	0
hsa04976	Bile secretion	1	1	0	0
hsa00430	Taurine and hypotaurine metabolism	1	0.22365	1	4
hsa00512	Mucin type O-glycan biosynthesis	1	1	0	0
hsa00532	Glycosaminoglycan biosynthesis - chondroitin sulfate / dermatan sulfate	1	1	0	0
hsa04930	Type II diabetes mellitus	1	1	0	0
hsa00620	Pyruvate metabolism	1	1	0	0
hsa00280	Valine, leucine and isoleucine degradation	1	1	0	0
hsa00290	Valine, leucine and isoleucine biosynthesis	1	1	0	0
hsa00670	One carbon pool by folate	1	1	0	0
hsa04978	Mineral absorption	1	1	0	0
hsa05014	Amyotrophic lateral sclerosis (ALS)	1	0.299834	1	7
hsa00591	Linoleic acid metabolism	1	1	0	0
hsa04310	Wnt signaling pathway	1	1	0	0
hsa05016	Huntington's disease	1	0.633425	1	2
hsa04360	Axon guidance	1	1	0	0
hsa04380	Osteoclast differentiation	1	1	0	0
hsa04114	Oocyte meiosis	1	1	0	0
hsa04260	Cardiac muscle contraction	1	1	0	0
hsa05010	Alzheimer's disease	1	1	0	0
hsa04742	Taste transduction	1	1	0	0
hsa04710	Circadian rhythm	1	1	0	0
hsa04721	Synaptic vesicle cycle	1	1	0	0
hsa04914	Progesterone-mediated oocyte maturation	1	1	0	0
hsa04610	Complement and coagulation cascades	1	1	0	0
hsa04340	Hedgehog signaling pathway	1	1	0	0
hsa00072	Synthesis and degradation of ketone bodies	1	1	0	0
hsa04974	Protein digestion and absorption	1	1	0	0
hsa04977	Vitamin digestion and absorption	1	1	0	0
hsa04740	Olfactory transduction	1	1	0	0
hsa04727	GABAergic synapse	1	1	0	0
hsa04962	Vasopressin-regulated water reabsorption	1	1	0	0
hsa00531	Glycosaminoglycan degradation	1	1	0	0

## Sheet: VC
path.id - pathway KEGG ID
path.name - pathway name
p.adjust - P values corrected for multiple testing
p.val - nominal P values
numb.mets - number of differential metabolites within a pathway
numb.genes - number of genes associated with differetial metabolites
Table includes multiple worksheets – one for each tissue
path.id	path.name	p.adjust	p.val	numb.mets	numb.genes
hsa00190	Oxidative phosphorylation	4.7851e-34	3.36979e-36	1	47
hsa00230	Purine metabolism	3.54449e-22	4.99224e-24	10	86
hsa00480	Glutathione metabolism	4.61283e-14	9.74542e-16	3	35
hsa04727	GABAergic synapse	8.43636e-07	2.37644e-08	1	21
hsa00410	beta-Alanine metabolism	6.48858e-06	2.28471e-07	2	18
hsa00330	Arginine and proline metabolism	0.000619646	2.61822e-05	7	24
hsa00250	Alanine, aspartate and glutamate metabolism	0.182813	0.00901189	3	12
hsa00750	Vitamin B6 metabolism	0.229937	0.0129542	1	4
hsa00564	Glycerophospholipid metabolism	0.423163	0.0268202	4	24
hsa00300	Lysine biosynthesis	0.491607	0.0346202	1	2
hsa00270	Cysteine and methionine metabolism	0.571197	0.046688	2	11
hsa00240	Pyrimidine metabolism	0.571197	0.0482702	4	26
hsa04724	Glutamatergic synapse	0.895994	0.0820277	1	13
hsa00430	Taurine and hypotaurine metabolism	0.98802	0.0974105	1	4
hsa00982	Drug metabolism - cytochrome P450	1	1	0	0
hsa04662	B cell receptor signaling pathway	1	1	0	0
hsa04660	T cell receptor signaling pathway	1	1	0	0
hsa04370	VEGF signaling pathway	1	1	0	0
hsa04012	ErbB signaling pathway	1	1	0	0
hsa04062	Chemokine signaling pathway	1	1	0	0
hsa04973	Carbohydrate digestion and absorption	1	1	0	0
hsa04151	PI3K-Akt signaling pathway	1	0.799853	1	2
hsa04510	Focal adhesion	1	1	0	0
hsa04722	Neurotrophin signaling pathway	1	1	0	0
hsa04666	Fc gamma R-mediated phagocytosis	1	1	0	0
hsa04810	Regulation of actin cytoskeleton	1	1	0	0
hsa04650	Natural killer cell mediated cytotoxicity	1	1	0	0
hsa04910	Insulin signaling pathway	1	1	0	0
hsa04150	mTOR signaling pathway	1	0.685119	1	2
hsa04664	Fc epsilon RI signaling pathway	1	1	0	0
hsa04070	Phosphatidylinositol signaling system	1	1	0	0
hsa04960	Aldosterone-regulated sodium reabsorption	1	1	0	0
hsa00562	Inositol phosphate metabolism	1	1	0	0
hsa00980	Metabolism of xenobiotics by cytochrome P450	1	1	0	0
hsa00030	Pentose phosphate pathway	1	0.794954	1	4
hsa00010	Glycolysis / Gluconeogenesis	1	0.999981	1	2
hsa00120	Primary bile acid biosynthesis	1	1	0	0
hsa00140	Steroid hormone biosynthesis	1	1	0	0
hsa00061	Fatty acid biosynthesis	1	1	0	0
hsa04080	Neuroactive ligand-receptor interaction	1	0.269608	4	49
hsa00600	Sphingolipid metabolism	1	0.999933	1	1
hsa00592	alpha-Linolenic acid metabolism	1	1	0	0
hsa04010	MAPK signaling pathway	1	1	0	0
hsa04066	HIF-1 signaling pathway	1	1	0	0
hsa00590	Arachidonic acid metabolism	1	1	0	0
hsa03320	PPAR signaling pathway	1	1	0	0
hsa00860	Porphyrin and chlorophyll metabolism	1	1	0	0
hsa00380	Tryptophan metabolism	1	1	0	0
hsa00130	Ubiquinone and other terpenoid-quinone biosynthesis	1	1	0	0
hsa00983	Drug metabolism - other enzymes	1	1	0	0
hsa00785	Lipoic acid metabolism	1	1	0	0
hsa00565	Ether lipid metabolism	1	1	0	0
hsa00740	Riboflavin metabolism	1	1	0	0
hsa00520	Amino sugar and nucleotide sugar metabolism	1	0.696216	3	8
hsa00472	D-Arginine and D-ornithine metabolism	1	1	0	0
hsa04020	Calcium signaling pathway	1	1	0	0
hsa04728	Dopaminergic synapse	1	1	0	0
hsa04540	Gap junction	1	1	0	0
hsa04730	Long-term depression	1	1	0	0
hsa04726	Serotonergic synapse	1	1	0	0
hsa04723	Retrograde endocannabinoid signaling	1	1	0	0
hsa04270	Vascular smooth muscle contraction	1	0.999999	1	2
hsa04971	Gastric acid secretion	1	1	0	0
hsa04720	Long-term potentiation	1	1	0	0
hsa04725	Cholinergic synapse	1	1	0	0
hsa04970	Salivary secretion	1	1	0	0
hsa04916	Melanogenesis	1	1	0	0
hsa04713	Circadian entrainment	1	1	0	0
hsa04972	Pancreatic secretion	1	1	0	0
hsa04961	Endocrine and other factor-regulated calcium reabsorption	1	1	0	0
hsa04912	GnRH signaling pathway	1	1	0	0
hsa04920	Adipocytokine signaling pathway	1	1	0	0
hsa04975	Fat digestion and absorption	1	1	0	0
hsa01040	Biosynthesis of unsaturated fatty acids	1	1	0	0
hsa00053	Ascorbate and aldarate metabolism	1	1	0	0
hsa04744	Phototransduction	1	1	0	0
hsa00830	Retinol metabolism	1	1	0	0
hsa00650	Butanoate metabolism	1	0.817813	2	4
hsa00071	Fatty acid degradation	1	1	0	0
hsa00310	Lysine degradation	1	0.578244	3	9
hsa00052	Galactose metabolism	1	0.74241	1	4
hsa00780	Biotin metabolism	1	1	0	0
hsa00450	Selenocompound metabolism	1	1	0	0
hsa00970	Aminoacyl-tRNA biosynthesis	1	0.999807	1	1
hsa00460	Cyanoamino acid metabolism	1	1	0	0
hsa00790	Folate biosynthesis	1	1	0	0
hsa00040	Pentose and glucuronate interconversions	1	0.966656	2	3
hsa00340	Histidine metabolism	1	0.619234	1	5
hsa00360	Phenylalanine metabolism	1	1	0	0
hsa00900	Terpenoid backbone biosynthesis	1	1	0	0
hsa00770	Pantothenate and CoA biosynthesis	1	0.970442	1	1
hsa00640	Propanoate metabolism	1	0.998717	1	1
hsa00510	N-Glycan biosynthesis	1	1	0	0
hsa00062	Fatty acid elongation	1	1	0	0
hsa00020	Citrate cycle (TCA cycle)	1	1	0	0
hsa00471	D-Glutamine and D-glutamate metabolism	1	0.159933	1	2
hsa00260	Glycine, serine and threonine metabolism	1	0.999552	1	1
hsa00630	Glyoxylate and dicarboxylate metabolism	1	0.993139	1	1
hsa00561	Glycerolipid metabolism	1	0.954827	1	6
hsa00232	Caffeine metabolism	1	1	0	0
hsa00920	Sulfur metabolism	1	1	0	0
hsa00051	Fructose and mannose metabolism	1	1	0	0
hsa00350	Tyrosine metabolism	1	1	0	0
hsa04140	Autophagy - animal	1	1	0	0
hsa00730	Thiamine metabolism	1	1	0	0
hsa00400	Phenylalanine, tyrosine and tryptophan biosynthesis	1	1	0	0
hsa00760	Nicotinate and nicotinamide metabolism	1	1	0	0
hsa00563	Glycosylphosphatidylinositol (GPI)-anchor biosynthesis	1	1	0	0
hsa00100	Steroid biosynthesis	1	1	0	0
hsa04976	Bile secretion	1	1	0	0
hsa00500	Starch and sucrose metabolism	1	0.722721	1	9
hsa00512	Mucin type O-glycan biosynthesis	1	1	0	0
hsa00532	Glycosaminoglycan biosynthesis - chondroitin sulfate / dermatan sulfate	1	1	0	0
hsa04930	Type II diabetes mellitus	1	1	0	0
hsa00620	Pyruvate metabolism	1	1	0	0
hsa00280	Valine, leucine and isoleucine degradation	1	1	0	0
hsa00290	Valine, leucine and isoleucine biosynthesis	1	1	0	0
hsa00670	One carbon pool by folate	1	1	0	0
hsa04978	Mineral absorption	1	1	0	0
hsa05014	Amyotrophic lateral sclerosis (ALS)	1	1	0	0
hsa00591	Linoleic acid metabolism	1	1	0	0
hsa04310	Wnt signaling pathway	1	1	0	0
hsa05016	Huntington's disease	1	1	0	0
hsa04360	Axon guidance	1	1	0	0
hsa04380	Osteoclast differentiation	1	1	0	0
hsa04114	Oocyte meiosis	1	1	0	0
hsa04260	Cardiac muscle contraction	1	1	0	0
hsa05010	Alzheimer's disease	1	1	0	0
hsa04742	Taste transduction	1	1	0	0
hsa04710	Circadian rhythm	1	1	0	0
hsa04721	Synaptic vesicle cycle	1	1	0	0
hsa04964	Proximal tubule bicarbonate reclamation	1	1	0	0
hsa04914	Progesterone-mediated oocyte maturation	1	1	0	0
hsa04610	Complement and coagulation cascades	1	1	0	0
hsa00524	Neomycin, kanamycin and gentamicin biosynthesis	1	1	0	0
hsa04340	Hedgehog signaling pathway	1	1	0	0
hsa00072	Synthesis and degradation of ketone bodies	1	1	0	0
hsa04974	Protein digestion and absorption	1	1	0	0
hsa04977	Vitamin digestion and absorption	1	1	0	0
hsa04740	Olfactory transduction	1	1	0	0
hsa04962	Vasopressin-regulated water reabsorption	1	1	0	0
hsa00531	Glycosaminoglycan degradation	1	1	0	0

## Sheet: CB
path.id - pathway KEGG ID
path.name - pathway name
p.adjust - P values corrected for multiple testing
p.val - nominal P values
numb.mets - number of differential metabolites within a pathway
numb.genes - number of genes associated with differetial metabolites
Table includes multiple worksheets – one for each tissue
path.id	path.name	p.adjust	p.val	numb.mets	numb.genes
hsa00190	Oxidative phosphorylation	1.31716e-33	9.27574e-36	1	47
hsa00230	Purine metabolism	1.74619e-21	2.45942e-23	11	86
hsa00480	Glutathione metabolism	9.3191e-13	1.96882e-14	2	34
hsa04727	GABAergic synapse	1.23043e-06	3.46599e-08	1	21
hsa00330	Arginine and proline metabolism	0.0760973	0.00267948	4	20
hsa00250	Alanine, aspartate and glutamate metabolism	0.0838928	0.00354477	4	13
hsa00760	Nicotinate and nicotinamide metabolism	0.14255	0.00702714	1	11
hsa00750	Vitamin B6 metabolism	0.247507	0.013944	1	4
hsa00020	Citrate cycle (TCA cycle)	0.269525	0.0170826	3	11
hsa00564	Glycerophospholipid metabolism	0.465262	0.0335126	4	24
hsa00300	Lysine biosynthesis	0.465262	0.0360415	1	2
hsa00270	Cysteine and methionine metabolism	0.628151	0.0530832	2	11
hsa00240	Pyrimidine metabolism	0.960503	0.0946975	4	25
hsa04724	Glutamatergic synapse	0.960503	0.0933192	1	13
hsa00430	Taurine and hypotaurine metabolism	0.979449	0.103463	1	4
hsa00982	Drug metabolism - cytochrome P450	1	1	0	0
hsa04662	B cell receptor signaling pathway	1	1	0	0
hsa04660	T cell receptor signaling pathway	1	1	0	0
hsa04370	VEGF signaling pathway	1	1	0	0
hsa04012	ErbB signaling pathway	1	1	0	0
hsa04062	Chemokine signaling pathway	1	1	0	0
hsa04973	Carbohydrate digestion and absorption	1	1	0	0
hsa04151	PI3K-Akt signaling pathway	1	0.80978	1	2
hsa04510	Focal adhesion	1	1	0	0
hsa04722	Neurotrophin signaling pathway	1	1	0	0
hsa04666	Fc gamma R-mediated phagocytosis	1	1	0	0
hsa04810	Regulation of actin cytoskeleton	1	1	0	0
hsa04650	Natural killer cell mediated cytotoxicity	1	1	0	0
hsa04910	Insulin signaling pathway	1	1	0	0
hsa04150	mTOR signaling pathway	1	0.696804	1	2
hsa04664	Fc epsilon RI signaling pathway	1	1	0	0
hsa04070	Phosphatidylinositol signaling system	1	1	0	0
hsa04960	Aldosterone-regulated sodium reabsorption	1	1	0	0
hsa00562	Inositol phosphate metabolism	1	1	0	0
hsa00980	Metabolism of xenobiotics by cytochrome P450	1	1	0	0
hsa00030	Pentose phosphate pathway	1	0.808801	1	4
hsa00010	Glycolysis / Gluconeogenesis	1	1	0	0
hsa00120	Primary bile acid biosynthesis	1	1	0	0
hsa00140	Steroid hormone biosynthesis	1	1	0	0
hsa00061	Fatty acid biosynthesis	1	1	0	0
hsa04080	Neuroactive ligand-receptor interaction	1	0.598768	3	45
hsa00600	Sphingolipid metabolism	1	0.999946	1	1
hsa00592	alpha-Linolenic acid metabolism	1	1	0	0
hsa04010	MAPK signaling pathway	1	1	0	0
hsa04066	HIF-1 signaling pathway	1	1	0	0
hsa00590	Arachidonic acid metabolism	1	1	0	0
hsa03320	PPAR signaling pathway	1	1	0	0
hsa00860	Porphyrin and chlorophyll metabolism	1	1	0	0
hsa00380	Tryptophan metabolism	1	1	0	0
hsa00130	Ubiquinone and other terpenoid-quinone biosynthesis	1	1	0	0
hsa00983	Drug metabolism - other enzymes	1	1	0	0
hsa00785	Lipoic acid metabolism	1	1	0	0
hsa00565	Ether lipid metabolism	1	1	0	0
hsa00740	Riboflavin metabolism	1	1	0	0
hsa00520	Amino sugar and nucleotide sugar metabolism	1	0.719157	3	8
hsa00472	D-Arginine and D-ornithine metabolism	1	1	0	0
hsa04020	Calcium signaling pathway	1	1	0	0
hsa04728	Dopaminergic synapse	1	1	0	0
hsa04540	Gap junction	1	1	0	0
hsa04730	Long-term depression	1	1	0	0
hsa04726	Serotonergic synapse	1	1	0	0
hsa04723	Retrograde endocannabinoid signaling	1	1	0	0
hsa04270	Vascular smooth muscle contraction	1	0.999999	1	2
hsa04971	Gastric acid secretion	1	1	0	0
hsa04720	Long-term potentiation	1	1	0	0
hsa04725	Cholinergic synapse	1	1	0	0
hsa04970	Salivary secretion	1	1	0	0
hsa04916	Melanogenesis	1	1	0	0
hsa04713	Circadian entrainment	1	1	0	0
hsa04972	Pancreatic secretion	1	1	0	0
hsa04961	Endocrine and other factor-regulated calcium reabsorption	1	1	0	0
hsa04912	GnRH signaling pathway	1	1	0	0
hsa04920	Adipocytokine signaling pathway	1	1	0	0
hsa04975	Fat digestion and absorption	1	1	0	0
hsa01040	Biosynthesis of unsaturated fatty acids	1	1	0	0
hsa00053	Ascorbate and aldarate metabolism	1	0.996774	1	1
hsa04744	Phototransduction	1	1	0	0
hsa00830	Retinol metabolism	1	1	0	0
hsa00650	Butanoate metabolism	1	0.671073	3	5
hsa00071	Fatty acid degradation	1	1	0	0
hsa00310	Lysine degradation	1	0.74147	2	8
hsa00052	Galactose metabolism	1	0.897505	1	3
hsa00780	Biotin metabolism	1	1	0	0
hsa00450	Selenocompound metabolism	1	1	0	0
hsa00970	Aminoacyl-tRNA biosynthesis	1	0.999841	1	1
hsa00460	Cyanoamino acid metabolism	1	1	0	0
hsa00790	Folate biosynthesis	1	1	0	0
hsa00040	Pentose and glucuronate interconversions	1	0.911608	2	4
hsa00340	Histidine metabolism	1	0.272878	2	7
hsa00360	Phenylalanine metabolism	1	1	0	0
hsa00900	Terpenoid backbone biosynthesis	1	1	0	0
hsa00770	Pantothenate and CoA biosynthesis	1	1	0	0
hsa00640	Propanoate metabolism	1	0.95912	1	3
hsa00510	N-Glycan biosynthesis	1	1	0	0
hsa00062	Fatty acid elongation	1	1	0	0
hsa00471	D-Glutamine and D-glutamate metabolism	1	0.165561	1	2
hsa00260	Glycine, serine and threonine metabolism	1	0.999624	1	1
hsa00630	Glyoxylate and dicarboxylate metabolism	1	0.696869	3	4
hsa00561	Glycerolipid metabolism	1	0.960877	1	6
hsa00232	Caffeine metabolism	1	1	0	0
hsa00920	Sulfur metabolism	1	1	0	0
hsa00051	Fructose and mannose metabolism	1	1	0	0
hsa00410	beta-Alanine metabolism	1	0.934718	2	3
hsa00350	Tyrosine metabolism	1	1	0	0
hsa04140	Autophagy - animal	1	1	0	0
hsa00730	Thiamine metabolism	1	1	0	0
hsa00400	Phenylalanine, tyrosine and tryptophan biosynthesis	1	1	0	0
hsa00563	Glycosylphosphatidylinositol (GPI)-anchor biosynthesis	1	1	0	0
hsa00100	Steroid biosynthesis	1	1	0	0
hsa04976	Bile secretion	1	1	0	0
hsa00500	Starch and sucrose metabolism	1	0.965623	1	6
hsa00512	Mucin type O-glycan biosynthesis	1	1	0	0
hsa00532	Glycosaminoglycan biosynthesis - chondroitin sulfate / dermatan sulfate	1	1	0	0
hsa04930	Type II diabetes mellitus	1	1	0	0
hsa00620	Pyruvate metabolism	1	1	0	0
hsa00280	Valine, leucine and isoleucine degradation	1	1	0	0
hsa00290	Valine, leucine and isoleucine biosynthesis	1	1	0	0
hsa00670	One carbon pool by folate	1	1	0	0
hsa04978	Mineral absorption	1	1	0	0
hsa05014	Amyotrophic lateral sclerosis (ALS)	1	1	0	0
hsa00591	Linoleic acid metabolism	1	1	0	0
hsa04310	Wnt signaling pathway	1	1	0	0
hsa05016	Huntington's disease	1	1	0	0
hsa04360	Axon guidance	1	1	0	0
hsa04380	Osteoclast differentiation	1	1	0	0
hsa04114	Oocyte meiosis	1	1	0	0
hsa04260	Cardiac muscle contraction	1	1	0	0
hsa05010	Alzheimer's disease	1	1	0	0
hsa04742	Taste transduction	1	1	0	0
hsa04710	Circadian rhythm	1	1	0	0
hsa04721	Synaptic vesicle cycle	1	1	0	0
hsa04964	Proximal tubule bicarbonate reclamation	1	1	0	0
hsa04914	Progesterone-mediated oocyte maturation	1	1	0	0
hsa04610	Complement and coagulation cascades	1	1	0	0
hsa00524	Neomycin, kanamycin and gentamicin biosynthesis	1	1	0	0
hsa04340	Hedgehog signaling pathway	1	1	0	0
hsa00072	Synthesis and degradation of ketone bodies	1	1	0	0
hsa04974	Protein digestion and absorption	1	1	0	0
hsa04977	Vitamin digestion and absorption	1	1	0	0
hsa04740	Olfactory transduction	1	1	0	0
hsa04962	Vasopressin-regulated water reabsorption	1	1	0	0
hsa00531	Glycosaminoglycan degradation	1	1	0	0

## Sheet: muscle
path.id - pathway KEGG ID
path.name - pathway name
p.adjust - P values corrected for multiple testing
p.val - nominal P values
numb.mets - number of differential metabolites within a pathway
numb.genes - number of genes associated with differetial metabolites
Table includes multiple worksheets – one for each tissue
path.id	path.name	p.adjust	p.val	numb.mets	numb.genes
hsa00230	Purine metabolism	1.12965e-23	7.9553e-26	4	79
hsa00480	Glutathione metabolism	1.63103e-19	2.29722e-21	2	37
hsa00240	Pyrimidine metabolism	4.5123e-13	9.53302e-15	2	47
hsa04724	Glutamatergic synapse	1.50718e-07	4.24558e-09	1	24
hsa00410	beta-Alanine metabolism	1.35101e-05	4.75709e-07	4	16
hsa00471	D-Glutamine and D-glutamate metabolism	0.0117963	0.000498437	1	4
hsa00760	Nicotinate and nicotinamide metabolism	0.0200942	0.000990558	1	11
hsa04080	Neuroactive ligand-receptor interaction	0.0237764	0.00133952	4	53
hsa00020	Citrate cycle (TCA cycle)	0.0429506	0.00272222	3	11
hsa00270	Cysteine and methionine metabolism	0.146697	0.0103308	2	11
hsa04964	Proximal tubule bicarbonate reclamation	0.154521	0.0119699	1	4
hsa00250	Alanine, aspartate and glutamate metabolism	0.176232	0.0148928	2	10
hsa00330	Arginine and proline metabolism	0.377029	0.0371718	4	14
hsa05014	Amyotrophic lateral sclerosis (ALS)	0.377029	0.0360515	1	7
hsa04720	Long-term potentiation	0.41437	0.04811	1	9
hsa00340	Histidine metabolism	0.41437	0.0474455	4	8
hsa00430	Taurine and hypotaurine metabolism	0.41437	0.0496076	1	4
hsa00982	Drug metabolism - cytochrome P450	1	1	0	0
hsa04662	B cell receptor signaling pathway	1	1	0	0
hsa04660	T cell receptor signaling pathway	1	1	0	0
hsa04370	VEGF signaling pathway	1	1	0	0
hsa04012	ErbB signaling pathway	1	1	0	0
hsa04062	Chemokine signaling pathway	1	1	0	0
hsa04973	Carbohydrate digestion and absorption	1	1	0	0
hsa04151	PI3K-Akt signaling pathway	1	1	0	0
hsa04510	Focal adhesion	1	1	0	0
hsa04722	Neurotrophin signaling pathway	1	1	0	0
hsa04666	Fc gamma R-mediated phagocytosis	1	1	0	0
hsa04810	Regulation of actin cytoskeleton	1	1	0	0
hsa04650	Natural killer cell mediated cytotoxicity	1	1	0	0
hsa04910	Insulin signaling pathway	1	1	0	0
hsa04150	mTOR signaling pathway	1	1	0	0
hsa04664	Fc epsilon RI signaling pathway	1	1	0	0
hsa04070	Phosphatidylinositol signaling system	1	1	0	0
hsa04960	Aldosterone-regulated sodium reabsorption	1	1	0	0
hsa00562	Inositol phosphate metabolism	1	1	0	0
hsa00980	Metabolism of xenobiotics by cytochrome P450	1	1	0	0
hsa00030	Pentose phosphate pathway	1	1	0	0
hsa00010	Glycolysis / Gluconeogenesis	1	0.941793	1	6
hsa00120	Primary bile acid biosynthesis	1	1	0	0
hsa00140	Steroid hormone biosynthesis	1	1	0	0
hsa00061	Fatty acid biosynthesis	1	1	0	0
hsa00600	Sphingolipid metabolism	1	1	0	0
hsa00592	alpha-Linolenic acid metabolism	1	1	0	0
hsa04010	MAPK signaling pathway	1	1	0	0
hsa04066	HIF-1 signaling pathway	1	1	0	0
hsa00590	Arachidonic acid metabolism	1	1	0	0
hsa03320	PPAR signaling pathway	1	1	0	0
hsa00860	Porphyrin and chlorophyll metabolism	1	0.9926	1	2
hsa00380	Tryptophan metabolism	1	1	0	0
hsa00130	Ubiquinone and other terpenoid-quinone biosynthesis	1	1	0	0
hsa00983	Drug metabolism - other enzymes	1	1	0	0
hsa00785	Lipoic acid metabolism	1	1	0	0
hsa00565	Ether lipid metabolism	1	1	0	0
hsa00740	Riboflavin metabolism	1	1	0	0
hsa00520	Amino sugar and nucleotide sugar metabolism	1	0.596876	2	7
hsa00472	D-Arginine and D-ornithine metabolism	1	1	0	0
hsa04020	Calcium signaling pathway	1	0.999981	1	2
hsa04728	Dopaminergic synapse	1	1	0	0
hsa04540	Gap junction	1	0.98245	1	2
hsa04730	Long-term depression	1	0.403299	1	6
hsa04726	Serotonergic synapse	1	1	0	0
hsa04723	Retrograde endocannabinoid signaling	1	0.289045	1	6
hsa04270	Vascular smooth muscle contraction	1	0.999964	1	2
hsa04971	Gastric acid secretion	1	1	0	0
hsa04725	Cholinergic synapse	1	1	0	0
hsa04970	Salivary secretion	1	1	0	0
hsa04916	Melanogenesis	1	1	0	0
hsa04713	Circadian entrainment	1	0.514178	1	9
hsa04972	Pancreatic secretion	1	1	0	0
hsa04961	Endocrine and other factor-regulated calcium reabsorption	1	1	0	0
hsa04912	GnRH signaling pathway	1	1	0	0
hsa04920	Adipocytokine signaling pathway	1	1	0	0
hsa04975	Fat digestion and absorption	1	1	0	0
hsa01040	Biosynthesis of unsaturated fatty acids	1	1	0	0
hsa00564	Glycerophospholipid metabolism	1	0.966579	1	8
hsa00053	Ascorbate and aldarate metabolism	1	0.988029	1	1
hsa04744	Phototransduction	1	1	0	0
hsa00830	Retinol metabolism	1	1	0	0
hsa00650	Butanoate metabolism	1	0.834115	2	3
hsa00071	Fatty acid degradation	1	1	0	0
hsa00310	Lysine degradation	1	0.767787	1	6
hsa00052	Galactose metabolism	1	0.772796	1	3
hsa00780	Biotin metabolism	1	1	0	0
hsa00450	Selenocompound metabolism	1	1	0	0
hsa00970	Aminoacyl-tRNA biosynthesis	1	0.990109	1	2
hsa00460	Cyanoamino acid metabolism	1	1	0	0
hsa00790	Folate biosynthesis	1	0.644748	1	2
hsa00040	Pentose and glucuronate interconversions	1	0.9732	1	2
hsa00360	Phenylalanine metabolism	1	1	0	0
hsa00900	Terpenoid backbone biosynthesis	1	1	0	0
hsa00770	Pantothenate and CoA biosynthesis	1	0.93784	1	1
hsa00640	Propanoate metabolism	1	0.730772	2	4
hsa00510	N-Glycan biosynthesis	1	1	0	0
hsa00062	Fatty acid elongation	1	1	0	0
hsa00260	Glycine, serine and threonine metabolism	1	0.488707	1	6
hsa00630	Glyoxylate and dicarboxylate metabolism	1	0.286413	4	5
hsa00561	Glycerolipid metabolism	1	0.72348	2	7
hsa00232	Caffeine metabolism	1	1	0	0
hsa00920	Sulfur metabolism	1	1	0	0
hsa00051	Fructose and mannose metabolism	1	1	0	0
hsa00350	Tyrosine metabolism	1	1	0	0
hsa04140	Autophagy - animal	1	1	0	0
hsa00730	Thiamine metabolism	1	1	0	0
hsa00400	Phenylalanine, tyrosine and tryptophan biosynthesis	1	1	0	0
hsa00563	Glycosylphosphatidylinositol (GPI)-anchor biosynthesis	1	1	0	0
hsa00100	Steroid biosynthesis	1	1	0	0
hsa04976	Bile secretion	1	1	0	0
hsa00500	Starch and sucrose metabolism	1	0.856447	1	6
hsa00512	Mucin type O-glycan biosynthesis	1	1	0	0
hsa00532	Glycosaminoglycan biosynthesis - chondroitin sulfate / dermatan sulfate	1	1	0	0
hsa04930	Type II diabetes mellitus	1	0.881409	1	2
hsa00620	Pyruvate metabolism	1	1	0	0
hsa00280	Valine, leucine and isoleucine degradation	1	1	0	0
hsa00290	Valine, leucine and isoleucine biosynthesis	1	1	0	0
hsa00670	One carbon pool by folate	1	1	0	0
hsa00750	Vitamin B6 metabolism	1	1	0	0
hsa04978	Mineral absorption	1	1	0	0
hsa00591	Linoleic acid metabolism	1	1	0	0
hsa04310	Wnt signaling pathway	1	1	0	0
hsa05016	Huntington's disease	1	0.343202	1	2
hsa04360	Axon guidance	1	1	0	0
hsa04380	Osteoclast differentiation	1	1	0	0
hsa04114	Oocyte meiosis	1	1	0	0
hsa04260	Cardiac muscle contraction	1	1	0	0
hsa05010	Alzheimer's disease	1	1	0	0
hsa04742	Taste transduction	1	1	0	0
hsa04710	Circadian rhythm	1	1	0	0
hsa04721	Synaptic vesicle cycle	1	1	0	0
hsa00300	Lysine biosynthesis	1	1	0	0
hsa04914	Progesterone-mediated oocyte maturation	1	1	0	0
hsa04610	Complement and coagulation cascades	1	1	0	0
hsa00524	Neomycin, kanamycin and gentamicin biosynthesis	1	1	0	0
hsa04340	Hedgehog signaling pathway	1	1	0	0
hsa00072	Synthesis and degradation of ketone bodies	1	1	0	0
hsa04974	Protein digestion and absorption	1	1	0	0
hsa04977	Vitamin digestion and absorption	1	1	0	0
hsa04740	Olfactory transduction	1	1	0	0
hsa04727	GABAergic synapse	1	1	0	0
hsa04962	Vasopressin-regulated water reabsorption	1	1	0	0
hsa00190	Oxidative phosphorylation	1	1	0	0
hsa00531	Glycosaminoglycan degradation	1	1	0	0

## Sheet: kidney
path.id - pathway KEGG ID
path.name - pathway name
p.adjust - P values corrected for multiple testing
p.val - nominal P values
numb.mets - number of differential metabolites within a pathway
numb.genes - number of genes associated with differetial metabolites
Table includes multiple worksheets – one for each tissue
path.id	path.name	p.adjust	p.val	numb.mets	numb.genes
hsa00230	Purine metabolism	6.31976e-23	4.45053e-25	8	84
hsa00260	Glycine, serine and threonine metabolism	6.74447e-09	9.49925e-11	5	24
hsa00330	Arginine and proline metabolism	3.17889e-06	8.95461e-08	8	27
hsa04724	Glutamatergic synapse	3.17889e-06	7.88976e-08	1	24
hsa00430	Taurine and hypotaurine metabolism	3.00967e-05	1.05974e-06	2	9
hsa00480	Glutathione metabolism	0.00770754	0.000329194	6	19
hsa00640	Propanoate metabolism	0.00770754	0.000379949	2	14
hsa00750	Vitamin B6 metabolism	0.0137098	0.000772383	2	5
hsa00471	D-Glutamine and D-glutamate metabolism	0.0138458	0.000877548	1	4
hsa00760	Nicotinate and nicotinamide metabolism	0.0463041	0.00326085	2	11
hsa00340	Histidine metabolism	0.0569558	0.00455854	4	11
hsa00250	Alanine, aspartate and glutamate metabolism	0.0569558	0.00481316	3	12
hsa00072	Synthesis and degradation of ketone bodies	0.112349	0.0102854	1	5
hsa00630	Glyoxylate and dicarboxylate metabolism	0.144238	0.0142206	5	9
hsa04964	Proximal tubule bicarbonate reclamation	0.18757	0.0198138	1	4
hsa00020	Citrate cycle (TCA cycle)	0.21229	0.0239199	2	10
hsa00300	Lysine biosynthesis	0.248733	0.0297778	1	2
hsa00270	Cysteine and methionine metabolism	0.497294	0.0657003	2	10
hsa00061	Fatty acid biosynthesis	0.497294	0.0680279	1	3
hsa05014	Amyotrophic lateral sclerosis (ALS)	0.497294	0.0700414	1	7
hsa00030	Pentose phosphate pathway	0.623075	0.0948589	2	8
hsa00240	Pyrimidine metabolism	0.623075	0.0971311	3	23
hsa04720	Long-term potentiation	0.623075	0.100921	1	9
hsa00650	Butanoate metabolism	0.637736	0.112277	3	8
hsa00410	beta-Alanine metabolism	0.637736	0.112277	5	8
hsa00982	Drug metabolism - cytochrome P450	1	1	0	0
hsa04662	B cell receptor signaling pathway	1	1	0	0
hsa04660	T cell receptor signaling pathway	1	1	0	0
hsa04370	VEGF signaling pathway	1	1	0	0
hsa04012	ErbB signaling pathway	1	1	0	0
hsa04062	Chemokine signaling pathway	1	1	0	0
hsa04973	Carbohydrate digestion and absorption	1	1	0	0
hsa04151	PI3K-Akt signaling pathway	1	0.760998	1	2
hsa04510	Focal adhesion	1	1	0	0
hsa04722	Neurotrophin signaling pathway	1	1	0	0
hsa04666	Fc gamma R-mediated phagocytosis	1	1	0	0
hsa04810	Regulation of actin cytoskeleton	1	1	0	0
hsa04650	Natural killer cell mediated cytotoxicity	1	1	0	0
hsa04910	Insulin signaling pathway	1	1	0	0
hsa04150	mTOR signaling pathway	1	0.640845	1	2
hsa04664	Fc epsilon RI signaling pathway	1	1	0	0
hsa04070	Phosphatidylinositol signaling system	1	1	0	0
hsa04960	Aldosterone-regulated sodium reabsorption	1	1	0	0
hsa00562	Inositol phosphate metabolism	1	0.987744	1	5
hsa00980	Metabolism of xenobiotics by cytochrome P450	1	1	0	0
hsa00010	Glycolysis / Gluconeogenesis	1	0.817806	2	9
hsa00120	Primary bile acid biosynthesis	1	0.960844	2	1
hsa00140	Steroid hormone biosynthesis	1	1	0	0
hsa04080	Neuroactive ligand-receptor interaction	1	0.989724	3	30
hsa00600	Sphingolipid metabolism	1	0.969988	2	4
hsa00592	alpha-Linolenic acid metabolism	1	1	0	0
hsa04010	MAPK signaling pathway	1	1	0	0
hsa04066	HIF-1 signaling pathway	1	1	0	0
hsa00590	Arachidonic acid metabolism	1	1	0	0
hsa03320	PPAR signaling pathway	1	1	0	0
hsa00860	Porphyrin and chlorophyll metabolism	1	0.955375	2	4
hsa00380	Tryptophan metabolism	1	0.995564	1	2
hsa00130	Ubiquinone and other terpenoid-quinone biosynthesis	1	1	0	0
hsa00983	Drug metabolism - other enzymes	1	1	0	0
hsa00785	Lipoic acid metabolism	1	1	0	0
hsa00565	Ether lipid metabolism	1	1	0	0
hsa00740	Riboflavin metabolism	1	1	0	0
hsa00520	Amino sugar and nucleotide sugar metabolism	1	1	0	0
hsa00472	D-Arginine and D-ornithine metabolism	1	1	0	0
hsa04020	Calcium signaling pathway	1	1	0	0
hsa04728	Dopaminergic synapse	1	1	0	0
hsa04540	Gap junction	1	0.992607	1	2
hsa04730	Long-term depression	1	0.548889	1	6
hsa04726	Serotonergic synapse	1	1	0	0
hsa04723	Retrograde endocannabinoid signaling	1	0.418919	1	6
hsa04270	Vascular smooth muscle contraction	1	1	0	0
hsa04971	Gastric acid secretion	1	1	0	0
hsa04725	Cholinergic synapse	1	1	0	0
hsa04970	Salivary secretion	1	1	0	0
hsa04916	Melanogenesis	1	1	0	0
hsa04713	Circadian entrainment	1	0.69492	1	9
hsa04972	Pancreatic secretion	1	1	0	0
hsa04961	Endocrine and other factor-regulated calcium reabsorption	1	1	0	0
hsa04912	GnRH signaling pathway	1	1	0	0
hsa04920	Adipocytokine signaling pathway	1	1	0	0
hsa04975	Fat digestion and absorption	1	1	0	0
hsa01040	Biosynthesis of unsaturated fatty acids	1	1	0	0
hsa00564	Glycerophospholipid metabolism	1	0.248606	3	18
hsa00053	Ascorbate and aldarate metabolism	1	1	0	0
hsa04744	Phototransduction	1	1	0	0
hsa00830	Retinol metabolism	1	1	0	0
hsa00071	Fatty acid degradation	1	0.900613	1	5
hsa00310	Lysine degradation	1	0.213368	4	11
hsa00052	Galactose metabolism	1	1	0	0
hsa00780	Biotin metabolism	1	1	0	0
hsa00450	Selenocompound metabolism	1	1	0	0
hsa00970	Aminoacyl-tRNA biosynthesis	1	0.267805	5	9
hsa00460	Cyanoamino acid metabolism	1	0.347442	2	2
hsa00790	Folate biosynthesis	1	1	0	0
hsa00040	Pentose and glucuronate interconversions	1	0.987753	1	2
hsa00360	Phenylalanine metabolism	1	1	0	0
hsa00900	Terpenoid backbone biosynthesis	1	0.504033	1	4
hsa00770	Pantothenate and CoA biosynthesis	1	0.960844	1	1
hsa00510	N-Glycan biosynthesis	1	1	0	0
hsa00062	Fatty acid elongation	1	0.92728	1	2
hsa00561	Glycerolipid metabolism	1	0.850585	2	7
hsa00232	Caffeine metabolism	1	1	0	0
hsa00920	Sulfur metabolism	1	1	0	0
hsa00051	Fructose and mannose metabolism	1	1	0	0
hsa00350	Tyrosine metabolism	1	1	0	0
hsa04140	Autophagy - animal	1	1	0	0
hsa00730	Thiamine metabolism	1	1	0	0
hsa00400	Phenylalanine, tyrosine and tryptophan biosynthesis	1	1	0	0
hsa00563	Glycosylphosphatidylinositol (GPI)-anchor biosynthesis	1	1	0	0
hsa00100	Steroid biosynthesis	1	1	0	0
hsa04976	Bile secretion	1	1	0	0
hsa00500	Starch and sucrose metabolism	1	1	0	0
hsa00512	Mucin type O-glycan biosynthesis	1	1	0	0
hsa00532	Glycosaminoglycan biosynthesis - chondroitin sulfate / dermatan sulfate	1	1	0	0
hsa04930	Type II diabetes mellitus	1	1	0	0
hsa00620	Pyruvate metabolism	1	0.414474	1	8
hsa00280	Valine, leucine and isoleucine degradation	1	0.49945	1	8
hsa00290	Valine, leucine and isoleucine biosynthesis	1	1	0	0
hsa00670	One carbon pool by folate	1	1	0	0
hsa04978	Mineral absorption	1	1	0	0
hsa00591	Linoleic acid metabolism	1	1	0	0
hsa04310	Wnt signaling pathway	1	1	0	0
hsa05016	Huntington's disease	1	0.414551	1	2
hsa04360	Axon guidance	1	1	0	0
hsa04380	Osteoclast differentiation	1	1	0	0
hsa04114	Oocyte meiosis	1	1	0	0
hsa04260	Cardiac muscle contraction	1	1	0	0
hsa05010	Alzheimer's disease	1	1	0	0
hsa04742	Taste transduction	1	1	0	0
hsa04710	Circadian rhythm	1	1	0	0
hsa04721	Synaptic vesicle cycle	1	1	0	0
hsa04914	Progesterone-mediated oocyte maturation	1	1	0	0
hsa04610	Complement and coagulation cascades	1	1	0	0
hsa00524	Neomycin, kanamycin and gentamicin biosynthesis	1	1	0	0
hsa04340	Hedgehog signaling pathway	1	1	0	0
hsa04974	Protein digestion and absorption	1	1	0	0
hsa04977	Vitamin digestion and absorption	1	1	0	0
hsa04740	Olfactory transduction	1	1	0	0
hsa04727	GABAergic synapse	1	1	0	0
hsa04962	Vasopressin-regulated water reabsorption	1	1	0	0
hsa00190	Oxidative phosphorylation	1	1	0	0
hsa00531	Glycosaminoglycan degradation	1	1	0	0
