# Supplementary material for: Reduced purine biosynthesis in humans after their divergence from Neandertals
Source: eLife. 2021 May 4;10:e58741. doi: 10.7554/eLife.58741 (PMC8133780; doi:10.7554/eLife.58741)
Supplement: Supplementary file 6. — Table includes sample information for two age groups of wild type and humanized mice: one week and 12 weeks of age. Eight tissues were sampled for both age groups. Testes were additionally sampled for 12-weeks-old mice. Outlier samples are shaded in red. Table includes multiple worksheets – one for each age group. [file elife-58741-supp6.xlsx]

## Sheet: 1 week old
Supplementary Table 6. Mouse sample information.
cer - cerebellum
cor - cerebral cortex
hea - heart
kid - kidney
liv - liver
lun - lung
mus - muscle
spl - spleen
Red background indicates outlier samples identified using PCA.
Table includes multiple worksheets – one for each age group
Tissue	Animal ID	Weight (mg)	Genotype	Sample ID
cer	220	13	hum	hum_220_cer
cor	220	7	hum	hum_220_cor
hea	220	13	hum	hum_220_hea
kid	220	12	hum	hum_220_kid
liv	220	12	hum	hum_220_liv
lun	220	15	hum	hum_220_lun
mus	220	10	hum	hum_220_mus
spl	220	9	hum	hum_220_spl
cer	300	7	hum	hum_300_cer
cor	300	10	hum	hum_300_cor
hea	300	10	hum	hum_300_hea
kid	300	11	hum	hum_300_kid
liv	300	13	hum	hum_300_liv
lun	300	14	hum	hum_300_lun
mus	300	10	hum	hum_300_mus
spl	300	11	hum	hum_300_spl
cer	319	12	hum	hum_319_cer
cor	319	6	hum	hum_319_cor
hea	319	8	hum	hum_319_hea
kid	319	11	hum	hum_319_kid
liv	319	12	hum	hum_319_liv
lun	319	14	hum	hum_319_lun
mus	319	13	hum	hum_319_mus
spl	319	10	hum	hum_319_spl
cer	323	11	hum	hum_323_cer
cor	323	9	hum	hum_323_cor
hea	323	6	hum	hum_323_hea
kid	323	10	hum	hum_323_kid
liv	323	11	hum	hum_323_liv
lun	323	13	hum	hum_323_lun
mus	323	10	hum	hum_323_mus
spl	323	5	hum	hum_323_spl
cer	324	10	hum	hum_324_cer
cor	324	6	hum	hum_324_cor
hea	324	10	hum	hum_324_hea
kid	324	12	hum	hum_324_kid
liv	324	12	hum	hum_324_liv
lun	324	13	hum	hum_324_lun
mus	324	10	hum	hum_324_mus
spl	324	10	hum	hum_324_spl
cer	329	14	hum	hum_329_cer
cor	329	10	hum	hum_329_cor
hea	329	14	hum	hum_329_hea
kid	329	12	hum	hum_329_kid
liv	329	14	hum	hum_329_liv
lun	329	12	hum	hum_329_lun
mus	329	11	hum	hum_329_mus
spl	329	10	hum	hum_329_spl
cer	333	12	hum	hum_333_cer
cor	333	4	hum	hum_333_cor
hea	333	14	hum	hum_333_hea
kid	333	11	hum	hum_333_kid
liv	333	10	hum	hum_333_liv
lun	333	11	hum	hum_333_lun
mus	333	10	hum	hum_333_mus
spl	333	12	hum	hum_333_spl
cer	350	10	hum	hum_350_cer
cor	350	7	hum	hum_350_cor
hea	350	9	hum	hum_350_hea
kid	350	10	hum	hum_350_kid
liv	350	10	hum	hum_350_liv
lun	350	11	hum	hum_350_lun
mus	350	14	hum	hum_350_mus
spl	350	14	hum	hum_350_spl
cer	352	10	wt	Wt_352_cer
cor	352	5	wt	Wt_352_cor
hea	352	10	wt	Wt_352_hea
kid	352	12	wt	Wt_352_kid
liv	352	12	wt	Wt_352_liv
lun	352	13	wt	Wt_352_lun
mus	352	7	wt	Wt_352_mus
spl	352	11	wt	Wt_352_spl
cer	362	14	hum	hum_362_cer
cor	362	6	hum	hum_362_cor
hea	362	12	hum	hum_362_hea
kid	362	12	hum	hum_362_kid
liv	362	10	hum	hum_362_liv
liv	362	10	hum	hum_362_liv.1
liv	362	13	hum	hum_362_liv.2
lun	362	11	hum	hum_362_lun
lun	362	10	hum	hum_362_lun.1
lun	362	10	hum	hum_362_lun.2
mus	362	8	hum	hum_362_mus
spl	362	12	hum	hum_362_spl
cer	363	15	hum	hum_363_cer
cor	363	6	hum	hum_363_cor
hea	363	7	hum	hum_363_hea
kid	363	11	hum	hum_363_kid
liv	363	11	hum	hum_363_liv
lun	363	11	hum	hum_363_lun
mus	363	11	hum	hum_363_mus
spl	363	15	hum	hum_363_spl
cer	422	15	wt	Wt_422_cer
cor	422	10	wt	Wt_422_cor
hea	422	10	wt	Wt_422_hea
kid	422	15	wt	Wt_422_kid
liv	422	12	wt	Wt_422_liv
lun	422	15	wt	Wt_422_lun
mus	422	13	wt	Wt_422_mus
spl	422	10	wt	Wt_422_spl
cer	424	15	wt	Wt_424_cer
cor	424	13	wt	Wt_424_cor
hea	424	12	wt	Wt_424_hea
kid	424	15	wt	Wt_424_kid
liv	424	15	wt	Wt_424_liv
lun	424	15	wt	Wt_424_lun
mus	424	12	wt	Wt_424_mus
spl	424	9	wt	Wt_424_spl
cer	426	12	wt	Wt_426_cer
cor	426	8	wt	Wt_426_cor
hea	426	15	wt	Wt_426_hea
kid	426	10	wt	Wt_426_kid
liv	426	12	wt	Wt_426_liv
liv	426	10	wt	Wt_426_liv.1
liv	426	10	wt	Wt_426_liv.2
lun	426	14	wt	Wt_426_lun
lun	426	10	wt	Wt_426_lun.1
lun	426	10	wt	Wt_426_lun.2
mus	426	13	wt	Wt_426_mus
spl	426	12	wt	Wt_426_spl
cer	429	15	hum	hum_429_cer
cor	429	11	hum	hum_429_cor
hea	429	10	hum	hum_429_hea
kid	429	12	hum	hum_429_kid
liv	429	14	hum	hum_429_liv
lun	429	10	hum	hum_429_lun
mus	429	13	hum	hum_429_mus
spl	429	15	hum	hum_429_spl
cer	436	15	hum	hum_436_cer
cor	436	7	hum	hum_436_cor
hea	436	13	hum	hum_436_hea
kid	436	9	hum	hum_436_kid
liv	436	12	hum	hum_436_liv
lun	436	13	hum	hum_436_lun
mus	436	14	hum	hum_436_mus
spl	436	12	hum	hum_436_spl
cer	626	11	wt	Wt_626_cer
cor	626	15	wt	Wt_626_cor
hea	626	12	wt	Wt_626_hea
kid	626	15	wt	Wt_626_kid
liv	626	10	wt	Wt_626_liv
lun	626	10	wt	Wt_626_lun
mus	626	12	wt	Wt_626_mus
spl	626	11	wt	Wt_626_spl
cer	628	13	wt	Wt_628_cer
cor	628	12	wt	Wt_628_cor
hea	628	15	wt	Wt_628_hea
kid	628	12	wt	Wt_628_kid
liv	628	11	wt	Wt_628_liv
lun	628	14	wt	Wt_628_lun
mus	628	13	wt	Wt_628_mus
spl	628	14	wt	Wt_628_spl
cer	629	14	wt	Wt_629_cer
cor	629	13	wt	Wt_629_cor
hea	629	7	wt	Wt_629_hea
kid	629	11	wt	Wt_629_kid
liv	629	11	wt	Wt_629_liv
lun	629	12	wt	Wt_629_lun
mus	629	8	wt	Wt_629_mus
spl	629	11	wt	Wt_629_spl
cer	630	15	wt	Wt_630_cer
cor	630	13	wt	Wt_630_cor
hea	630	10	wt	Wt_630_hea
kid	630	15	wt	Wt_630_kid
liv	630	11	wt	Wt_630_liv
lun	630	14	wt	Wt_630_lun
mus	630	11	wt	Wt_630_mus
spl	630	11	wt	Wt_630_spl
cer	632	8	wt	Wt_632_cer
cor	632	12	wt	Wt_632_cor
hea	632	7	wt	Wt_632_hea
kid	632	12	wt	Wt_632_kid
liv	632	15	wt	Wt_632_liv
lun	632	13	wt	Wt_632_lun
mus	632	10	wt	Wt_632_mus
spl	632	13	wt	Wt_632_spl
cer	634	12	wt	Wt_634_cer
cor	634	8	wt	Wt_634_cor
hea	634	8	wt	Wt_634_hea
kid	634	13	wt	Wt_634_kid
liv	634	15	wt	Wt_634_liv
lun	634	13	wt	Wt_634_lun
mus	634	12	wt	Wt_634_mus
spl	634	9	wt	Wt_634_spl

## Sheet: 12 weeks old
cer - cerebellum
cor - cerebral cortex
hea - heart
kid - kidney
liv - liver
lun - lung
mus - muscle
spl - spleen
Red background indicates outlier samples identified using PCA.
Table includes multiple worksheets – one for each age group
Tissue	Animal ID	Weight (mg)	Genotype	Sample ID
cer	91	13	wt	Wt_91_1 _cer
cor	91	14	wt	Wt_91_2 _cor
hea	91	15	wt	Wt_91_3 _hea
kid	91	15	wt	Wt_91_6 _kid
liv	91	15	wt	Wt_91_5 _liv
lun	91	13	wt	Wt_91_4 _lun
mus	91	15	wt	Wt_91_9 _mus
spl	91	14	wt	Wt_91_7 _spl
tes	91	14	wt	Wt_91_8 _tes
cer	98	14	hum	hum_98_1 _cer
cor	98	11	hum	hum_98_2 _cor
hea	98	13	hum	hum_98_3 _hea
kid	98	12	hum	hum_98_6 _kid
liv	98	13	hum	hum_98_5 _liv
lun	98	12	hum	hum_98_4 _lun
mus	98	10	hum	hum_98_9 _mus
spl	98	13	hum	hum_98_7 _spl
tes	98	10	hum	hum_98_8 _tes
cer	101	13	hum	hum_101_1 _cer
cor	101	14	hum	hum_101_2 _cor
hea	101	15	hum	hum_101_3 _hea
kid	101	12	hum	hum_101_6 _kid
liv	101	13	hum	hum_101_5 _liv
lun	101	12	hum	hum_101_4 _lun
mus	101	14	hum	hum_101_9 _mus
spl	101	15	hum	hum_101_7 _spl
tes	101	12	hum	hum_101_8 _tes
cer	102	11	hum	hum_102_1 _cer
cor	102	14	hum	hum_102_2 _cor
hea	102	12	hum	hum_102_3 _hea
kid	102	15	hum	hum_102_6 _kid
liv	102	11	hum	hum_102_5 _liv
lun	102	10	hum	hum_102_4 _lun
mus	102	12	hum	hum_102_9 _mus
spl	102	14	hum	hum_102_7 _spl
tes	102	12	hum	hum_102_8 _tes
cer	103	15	hum	hum_103_1 _cer
cor	103	10	hum	hum_103_2 _cor
hea	103	14	hum	hum_103_3 _hea
kid	103	12	hum	hum_103_6 _kid
liv	103	13	hum	hum_103_5 _liv
lun	103	12	hum	hum_103_4 _lun
mus	103	14	hum	hum_103_9 _mus
spl	103	15	hum	hum_103_7 _spl
tes	103	14	hum	hum_103_8 _tes
cer	104	15	hum	hum_104_1 _cer
cor	104	11	hum	hum_104_2 _cor
hea	104	14	hum	hum_104_3 _hea
kid	104	15	hum	hum_104_6 _kid
liv	104	14	hum	hum_104_5 _liv
lun	104	10	hum	hum_104_4 _lun
mus	104	13	hum	hum_104_9 _mus
spl	104	15	hum	hum_104_7 _spl
tes	104	13	hum	hum_104_8 _tes
cer	105	11	hum	hum_105_1 _cer
cor	105	10	hum	hum_105_2 _cor
hea	105	12	hum	hum_105_3 _hea
kid	105	15	hum	hum_105_6 _kid
lun	105	11	hum	hum_105_4 _lun
mus	105	13	hum	hum_105_9 _mus
spl	105	11	hum	hum_105_7 _spl
tes	105	13	hum	hum_105_8 _tes
cer	106	12	hum	hum_106_1 _cer
cor	106	12	hum	hum_106_2 _cor
hea	106	15	hum	hum_106_3 _hea
kid	106	14	hum	hum_106_6 _kid
liv	106	11	hum	hum_106_5 _liv
lun	106	13	hum	hum_106_4 _lun
mus	106	12	hum	hum_106_9 _mus
spl	106	13	hum	hum_106_7 _spl
tes	106	13	hum	hum_106_8 _tes
cer	120	12	hum	hum_120_1 _cer
cor	120	12	hum	hum_120_2 _cor
hea	120	13	hum	hum_120_3 _hea
kid	120	11	hum	hum_120_6 _kid
lun	120	14	hum	hum_120_4 _lun
mus	120	10	hum	hum_120_9 _mus
spl	120	14	hum	hum_120_7 _spl
tes	120	10	hum	hum_120_8 _tes
cer	121	13	hum	hum_121_1 _cer
cor	121	10	hum	hum_121_2 _cor
hea	121	11	hum	hum_121_3 _hea
kid	121	11	hum	hum_121_6 _kid
liv	121	12	hum	hum_121_5 _liv
lun	121	12	hum	hum_121_4 _lun
mus	121	12	hum	hum_121_9 _mus
spl	121	13	hum	hum_121_7 _spl
tes	121	12	hum	hum_121_8 _tes
cer	132	14	wt	Wt_132_1 _cer
cor	132	13	wt	Wt_132_2 _cor
hea	132	13	wt	Wt_132_3 _hea
kid	132	12	wt	Wt_132_6 _kid
liv	132	10	wt	Wt_132_5 _liv
lun	132	15	wt	Wt_132_4 _lun
mus	132	14	wt	Wt_132_9 _mus
spl	132	15	wt	Wt_132_7 _spl
tes	132	15	wt	Wt_132_8 _tes
cer	133	14	wt	Wt_133_1 _cer
cor	133	13	wt	Wt_133_2 _cor
hea	133	11	wt	Wt_133_3 _hea
kid	133	15	wt	Wt_133_6 _kid
liv	133	12	wt	Wt_133_5 _liv
lun	133	15	wt	Wt_133_4 _lun
mus	133	12	wt	Wt_133_9 _mus
spl	133	11	wt	Wt_133_7 _spl
tes	133	10	wt	Wt_133_8 _tes
cer	134	12	wt	Wt_134_1 _cer
cor	134	12	wt	Wt_134_2 _cor
hea	134	12	wt	Wt_134_3 _hea
kid	134	15	wt	Wt_134_6 _kid
liv	134	12	wt	Wt_134_5 _liv
lun	134	10	wt	Wt_134_4 _lun
mus	134	14	wt	Wt_134_9 _mus
spl	134	12	wt	Wt_134_7 _spl
tes	134	15	wt	Wt_134_8 _tes
cer	135	11	wt	Wt_135_1 _cer
cor	135	14	wt	Wt_135_2 _cor
hea	135	14	wt	Wt_135_3 _hea
kid	135	11	wt	Wt_135_6 _kid
liv	135	11	wt	Wt_135_5 _liv
lun	135	13	wt	Wt_135_4 _lun
mus	135	13	wt	Wt_135_9 _mus
spl	135	14	wt	Wt_135_7 _spl
tes	135	11	wt	Wt_135_8 _tes
cer	141	15	hum	hum_141_1 _cer
cor	141	13	hum	hum_141_2 _cor
hea	141	10	hum	hum_141_3 _hea
kid	141	12	hum	hum_141_6 _kid
liv	141	15	hum	hum_141_5 _liv
lun	141	13	hum	hum_141_4 _lun
mus	141	14	hum	hum_141_9 _mus
spl	141	13	hum	hum_141_7 _spl
tes	141	10	hum	hum_141_8 _tes
cer	142	14	wt	Wt_142_1 _cer
cor	142	13	wt	Wt_142_2 _cor
hea	142	13	wt	Wt_142_3 _hea
kid	142	10	wt	Wt_142_6 _kid
liv	142	13	wt	Wt_142_5 _liv
lun	142	15	wt	Wt_142_4 _lun
mus	142	15	wt	Wt_142_9 _mus
spl	142	13	wt	Wt_142_7 _spl
tes	142	13	wt	Wt_142_8 _tes
cer	147	15	wt	Wt_147_1 _cer
cor	147	13	wt	Wt_147_2 _cor
hea	147	11	wt	Wt_147_3 _hea
kid	147	11	wt	Wt_147_6 _kid
liv	147	13	wt	Wt_147_5 _liv
lun	147	13	wt	Wt_147_4 _lun
mus	147	12	wt	Wt_147_9 _mus
spl	147	13	wt	Wt_147_7 _spl
tes	147	13	wt	Wt_147_8 _tes
cer	148	13	wt	Wt_148_1 _cer
cor	148	9	wt	Wt_148_2 _cor
hea	148	15	wt	Wt_148_3 _hea
kid	148	11	wt	Wt_148_6 _kid
liv	148	11	wt	Wt_148_5 _liv
lun	148	15	wt	Wt_148_4 _lun
mus	148	14	wt	Wt_148_9 _mus
spl	148	13	wt	Wt_148_7 _spl
tes	148	15	wt	Wt_148_8 _tes
cor	152	15	wt	Wt_152_2 _cor
hea	152	10	wt	Wt_152_3 _hea
kid	152	11	wt	Wt_152_6 _kid
liv	152	10	wt	Wt_152_5 _liv
lun	152	14	wt	Wt_152_4 _lun
mus	152	15	wt	Wt_152_9 _mus
spl	152	15	wt	Wt_152_7 _spl
tes	152	14	wt	Wt_152_8 _tes
cer	153	13	hum	hum_153_1 _cer
cor	153	13	hum	hum_153_2 _cor
hea	153	10	hum	hum_153_3 _hea
kid	153	13	hum	hum_153_6 _kid
liv	153	12	hum	hum_153_5 _liv
lun	153	10	hum	hum_153_4 _lun
mus	153	10	hum	hum_153_9 _mus
spl	153	12	hum	hum_153_7_spl
tes	153	15	hum	hum_153_8 _tes
cer	wt1	11	wt	Wt_wt1_1 _cer
cor	wt2	10	wt	Wt_wt2_2 _cor
hea	wt3	15	wt	Wt_wt3_3 _hea
lun	wt4	13	wt	Wt_wt6_6 _kid
liv	wt5	11	wt	Wt_wt5_5 _liv
kid	wt6	10	wt	Wt_wt4_4 _lun
spl	wt7	13	wt	Wt_wt9_9 _mus
tes	wt8	11	wt	Wt_wt7_7 _spl
mus	wt9	15	wt	Wt_wt8_8 _tes
