# Supplementary material for: Reduced purine biosynthesis in humans after their divergence from Neandertals
Source: eLife. 2021 May 4;10:e58741. doi: 10.7554/eLife.58741 (PMC8133780; doi:10.7554/eLife.58741)
Supplement: Supplementary file 7. — The table includes multiple worksheets – one for each tissue. [file elife-58741-supp7.xlsx]

## Sheet: CR
Supplementary Table 7. Normalized intensities of metabolites detected using GC-MS in one-week-old mice
Table includes multiple worksheets – one for each tissue
hum - humanized mice
wt - wild type
number - animal ID
Metabolites	hum_220_cor	hum_300_cor	hum_319_cor	hum_324_cor	hum_329_cor	hum_333_cor	hum_350_cor	Wt_352_cor	hum_363_cor	Wt_426_cor	hum_429_cor	hum_436_cor	Wt_626_cor	Wt_629_cor	Wt_630_cor	Wt_632_cor	Wt_634_cor
Orthophosphate | Phosphoric_acid_(3TMS)_333095_TRUE	1.93083968783187	1.83306671720389	1.88076820448302	1.95429693947421	1.82117631239564	2.05785874141728	1.86966677236727	1.88247224708794	1.89915128502796	1.91042345452771	1.86883889037907	1.85443636572012	1.79162685111636	1.78440736919052	1.77799224118982	1.76764253240584	1.75226227655573
Glucuronic_acid-3,6-lactone_(1MEOX)_(3TMS)_MP_657311_TRUE | Inositol, myo- (6TMS) [MP-1.1]	1.8083299693113	1.72039233491251	1.77056408074846	1.78380534842321	1.73146748722351	1.87385885796595	1.74744689921743	1.77291677176129	1.83736160427864	1.78491034794167	1.71125530406003	1.75513641627431	1.69880265813805	1.69907159987673	1.66473636092538	1.65346341989493	1.63463765823491
Cinnamic_acid,_3-methoxy-,_trans-_(1TMS)_649428.75_TRUE | Inositol,_myo-_(6TMS)_654785.31_TRUE	1.70221425362636	1.62131379894008	1.66756303189056	1.68079731601488	1.63479232631653	1.7648031721483	1.64705834856981	1.67131647673182	1.72819346099435	1.68598934286972	1.6120769871285	1.65585282215864	1.60112362911287	1.60831319739957	1.57108153783262	1.55944767235959	1.54139362026883
Glutamate (3TMS) [MP-1.1] | Glutamic_acid_(3TMS)_509813.31_PRED	1.84291293853443	1.77641662630301	1.77829647883729	1.77887583103934	1.79909733866663	1.88872840901998	1.74807445766806	1.74187909824943	1.79052863546332	1.82409678601976	1.775809957776	1.71811707856332	1.72366242364703	1.68203240276967	1.70134078216908	1.68150363204908	1.6641761492228
Galactaric_acid_(6TMS)_658294.38_TRUE	1.69617819468755	1.61634828918118	1.65520848137017	1.66272219203442	1.62315015074923	1.74829714932606	1.63115458204895	1.65804001199987	1.71133390237498	1.67257065615376	1.60565403105313	1.63859750529108	1.59887398639106	1.58709706455222	1.56111235072768	1.55472138644945	1.53581628335474
Pyroglutamate (2TMS) [MP-1.1] | Pyroglutamic_acid_(2TMS)_507313.84_TRUE	1.74112251884616	1.64753751430964	1.68056642203407	1.68359414972882	1.69763976313767	1.79314763384372	1.65152025417075	1.6313373052991	1.70182984702889	1.72825409236957	NA	1.63945791680158	1.64959966289009	1.60791904119032	1.60079100385028	1.57397610020853	1.57916368248231
Arginine [MP-1.1] | Creatinine_(3TMS)_489565_TRUE	1.69375257759879	1.68776518545466	1.60470015160911	1.6511014093359	1.68018540090957	1.63026531902426	1.5833349443695	1.58553779888521	1.61708665559228	1.63046023019256	1.6310438862714	1.56567674199139	1.55142141392511	1.58414907360965	1.5217099199121	1.56968847950167	1.56951544121217
Butanoate, 4-Amino- (3TMS) [MP-1.1]	1.55957884496197	1.42961237657132	1.42382731808446	1.49755444892064	1.51782213024053	1.59149001819892	1.34378523997329	1.25560540410621	1.49068126066353	1.56081451628655	1.52134556247936	1.44274109109807	1.4805102321156	1.50253800397256	1.49294775769849	1.45900636430512	1.43251132638087
Asparagine (3TMS) [MP-1.1] | Aspartic_acid_(4TMS)_550990.62_TRUE | Caproic_acid,_6-amino-_(3TMS)_546902.25_TRUE	1.73410047844185	1.66248840688269	1.77343895165829	1.79028517585593	1.62577203908355	1.82405367732508	1.75793421196732	1.80785584411421	1.87423140147978	1.70450685785702	1.6364575699552	1.68581972695092	1.64297812980328	1.63398452755757	1.34845187012617	1.51495159043834	1.57105010425142
Ascorbate, 1-Dehydro- (dimer;2MEOX) [MP-1.1] | Dehydroascorbic_acid_dimer_(2MEOX)_MP_625466.25_TRUE	1.72418343086693	1.69210244344881	1.6429836036318	1.65600065014036	1.67933370738834	1.6949461386727	1.58854753298729	1.5971713265403	1.68651692709113	1.67912517701858	1.63843658225196	1.6109648638079	1.64702592080112	1.63791647835533	1.59122883185005	1.61207663896173	1.58341078171385
Ethanolamine_(3TMS)_321815.91_PRED | Glycine (3TMS) [MP-1.1] | Glycine_(3TMS)_326251.06_TRUE	1.60408660473765	1.43511910329286	1.56106448726189	1.59125074426115	1.48501743955578	1.55940967338892	1.42616208951904	1.32812794709592	1.5784259253239	1.56133402733823	1.50994572959926	1.56012259310493	1.53421791744365	1.55368322693438	1.51333228857368	1.54142559015755	1.48023820132732
Aspartate (3TMS) [MP-1.1] | Aspartic_acid_(3TMS)_458039.69_TRUE	1.65634105365746	1.63245404929111	1.58316665469072	1.61008509434762	1.66487949409403	1.68100502664924	1.54644632926813	1.5770907097972	1.64103304857419	1.6609762382039	1.71894418078642	1.53588344106855	1.61270842757983	1.60524807620617	1.58917829122189	1.57779828550811	1.52880270038992
Butanoic_acid,_4-amino-_(3TMS)_452983.28_TRUE	1.63923963727241	1.61697069501695	1.57544231685447	1.60408455947696	1.64000114502606	1.6720975679434	1.53854987131389	1.5688223839755	1.63677149599122	1.64487219820545	1.69703087833045	1.52492030815768	1.60091110129138	1.5886819579763	1.57682353483787	1.56174931399144	1.51570471424196
Phenethylamine_(2TMS)_490740.62_TRUE	1.52994952193665	1.53511539060862	1.44421198068059	1.49076991890311	1.52539308624729	1.4615757504165	1.42667526008761	1.42453627410123	1.45081443111077	1.47761676994573	1.47465521253201	1.40991770338557	1.40887573054823	1.43950409062829	1.3820800045711	1.4265767644724	1.42460506855016
Hypotaurine_(3TMS)_509415.53_TRUE	1.57743136339546	1.51310203078564	1.542371712693	1.54555637227686	1.54243737875107	1.6430404360841	1.51755526318193	1.50881835735314	1.55004072337251	1.58432023860296	1.50918723186113	1.49230504265513	1.48826954089389	1.44500227068446	1.46347392154962	1.44216182717655	1.42588158821464
Asparagine_(3TMS)_550488.31_TRUE	1.60197168624659	1.54173985730205	1.60034698326279	1.62233792801169	1.50871568061085	1.62787668981335	1.60024258684195	1.64870312619686	1.70051908781399	1.53464225040995	1.47857279955543	1.54058955804026	1.52490078338199	1.52258095684221	1.15872468975106	1.34792008521619	1.45284800636109
Oxalic_acid_(2TMS)_236929.91_PRED	1.51324649853368	1.64973669160293	1.45123857274245	1.4312086584351	1.432526588264	1.3407094862868	1.50868037444801	1.5728430662898	1.47572473574121	1.4317092288508	1.47666779303979	1.42219833536419	1.51634575395426	1.21007192222532	1.1675274194228	1.30881580817991	1.43213682774118
Gluconate|Galactonate [MP-1.1]	1.57007553142207	1.54494219208687	1.49526469041822	1.50577140701171	1.53063601159042	1.53784705833583	1.44321173538246	1.45430247368736	1.52965169649764	1.53242061433784	1.49462173221297	1.46470124632048	1.50395852593738	1.49574126777895	1.45612590730711	1.47536000700464	1.44882297467133
Benzoic_acid,_4-amino-_(2TMS)_650574.94_TRUE	1.38050019661699	1.32417395281119	1.35208416239249	1.35406053508431	1.33783033794315	1.42432111799065	1.32981961482735	1.35374146135123	1.38752161061369	1.38015425567805	1.31368061025634	1.34507853583362	1.30849220028582	1.31884093669056	1.28177224375936	1.27753283856614	1.25667549384443
Ethanolamine [MP-1.1]	1.3115408760386	1.36468816230521	1.2118606681538	1.30512719185731	1.35210050665325	1.38794408847356	1.19959818650512	1.11340828447049	1.27995227471731	1.30578696565013	1.36973605936866	1.35598386539587	1.35176610423721	1.35000473298119	1.21536537198959	1.40505187863918	1.19696877876513
Cinnamic_acid,_3-hydroxy-,_trans-_(2TMS)_653564.75_TRUE	1.36430198108793	1.30523439371733	1.32741452341667	1.32767315163481	1.32352895813132	1.40367344198745	1.31013848658279	1.33179537056611	1.36527868696338	1.35972689283168	1.29710643493263	1.32648252430306	1.29321858876864	1.30228115197925	1.26927617239796	1.26336977892269	1.24653838008666
Alanine (2TMS) [MP-1.1] | Alanine_(2TMS)_207563.2_TRUE	1.56381243803198	1.46164498889407	1.48378240563519	1.4516050667392	1.48709819689511	1.54605303879257	1.43469278928406	1.42849304846206	1.52743650731629	1.49753307394341	1.47785298534367	1.44173592418892	1.421623681305	1.41346986224431	1.42924907115921	1.38044685080567	1.42232678260488
Nonan-1-ol,_n-_(1TMS)_336924.19_PRED	1.44225448180026	1.39442655262628	1.42312555379027	1.49608518430272	1.39338944468538	1.57287408800803	1.41839725253961	1.41365557393169	1.41895830497323	1.44435469661705	1.44640444247877	1.40908617387018	1.36258633881351	1.37138388658934	1.35350232609235	1.34870709753911	1.31413844098698
Serine (3TMS) [MP-1.1] | Serine_(3TMS)_356866_TRUE	1.43816140662066	1.42959820374718	1.38404005644222	1.38457027536467	1.44594521822344	1.46766253873504	1.31047148277074	1.33959447952155	1.36463993302502	1.4598213172496	1.45678665541945	1.32215728088696	1.35056662686258	1.4060243759422	1.38406422484518	1.32277829366777	1.35083217440592
Proline [MP-1.1] | Proline_(2TMS)_340374.03_PRED	1.4574936948201	1.38751935645389	1.46730987800896	1.36893716619957	1.33671502181529	1.36416983650922	1.37810949450984	1.41329102393233	1.4273373686207	1.36684707277758	1.38212803130451	1.36415641164407	1.39899865003596	1.32989767674808	1.31861828828318	1.28581892506391	1.32776412236614
Succinic_acid_(2TMS)_365265.25_TRUE	1.42843233213838	1.37610104449134	1.33067618549008	1.32214740923337	1.39156672666843	1.42527305069659	1.28441954166178	1.29169855203583	1.29231928227651	1.42421642211306	1.39640941224711	1.26948222544878	1.31860156459038	1.28624680209941	1.28926516213412	1.27590660609184	1.29516385476477
Alanine_(3TMS)_355868.03_PRED | Pyruvic_acid,_3-hydroxy-_(1MEOX)_(2TMS)_BP_355231.75_PRED	1.38375745904144	1.37717515199073	1.33490436957185	1.32842074294243	1.3876976649981	1.4086588197843	1.25683293837228	1.27583128689837	1.3114984261403	1.40573079372853	1.40110681384759	1.26424798710095	1.30516054316194	1.35013281199084	1.33404136909578	1.27521751821163	1.29846901417499
Homoserine_(4TMS)_510930.09_TRUE	1.43092813415112	1.37796071838503	1.37614161548249	1.37019913678269	1.41219459776899	1.46801055477206	1.34822632275665	1.33317916179819	1.36707549432068	1.43737292446279	1.3777453842824	1.33324416958034	1.35356154878815	1.31053380426585	1.32979359910919	1.31054376100583	1.30037909621899
Glutamine [MP-1.1] | Glutamine,_DL-_(3TMS)_599684.19_PRED	1.272993036492	1.49583293785728	1.31387777166936	1.39300424405315	1.12160863616236	1.38537202845843	1.33986182821868	1.46689746945546	1.50924344750135	1.41107230459145	1.47429657285049	1.29492800867247	1.26834261719551	1.3530684444979	1.60756987507099	1.57127657715258	1.26339035254685
Adenine_(1TMS)_586048_PRED	1.485138992769	1.34693147957701	1.43376294619327	1.50747745141002	1.368851866589	1.56726295445834	1.41786205981095	1.41682164938339	1.56198536180327	1.46107745217127	1.41243624108477	1.42034112357443	1.38891922009031	1.36999634105383	1.36052802597923	1.34333405700419	1.29930970804998
Nonadecanoic_acid_methyl_ester_324789.09_PRED	1.41323711477648	1.33527642158725	1.47862337731928	1.48004702022022	1.32413338970879	1.51780294488915	1.43651945802035	1.45675558425861	1.53158405300726	1.41201264294006	1.34313147253196	1.40136411575048	1.31462097353775	1.30482599415079	1.30636940502275	1.29252766409901	1.28372132840692
Indole-3-ethanol,_1H-_(2TMS)_652683.19_PRED	1.23013086180406	1.18267935028534	1.23384550502511	1.22934455515447	1.18911409294279	1.29494989617969	1.2066112724772	1.23759350996272	1.26584580837064	1.24383989595433	1.18132341288177	1.21727692054122	1.17410935610594	1.17646547982691	1.147568390056	1.14238247151996	1.1301021283431
Pantothenic_acid,_D-_(4TMS)_624853.5_PRED	1.38519557117569	1.37119066609382	1.32079534027704	1.31926294407617	1.35948300622628	1.34484473956006	1.27163079255684	1.2811396454155	1.3433975123523	1.3556373105838	1.32241183882633	1.2958221487364	1.33527921832876	1.3308065397114	1.29265860036892	1.31493934363714	1.28597484123878
Butyric_acid,_3-amino-,_DL-_(2TMS)_281258.31_PRED	1.16986318704316	1.23011225190252	1.0749067572246	1.1631651048609	1.21907765524276	1.24203911575419	1.06427984411099	0.965546235995766	1.13008455067052	1.16494767681338	1.2405416512977	1.22148004872899	1.2169933082563	1.21896548296519	1.09614859823373	1.2753094138679	1.069795936518
Glycylglycine_(3TMS)_628479.25_TRUE	1.36581798163554	1.35178212075572	1.28410631527432	1.28259699462242	1.34588817004301	1.31317000181432	1.23412931059268	1.23775272990884	1.30507384350443	1.32849317744016	1.30181534167167	1.26259181381335	1.31231133808006	1.31111751489714	1.26870539244898	1.29263460601458	1.26625518232303
Threonine (3TMS) [MP-1.1] | Threonine,_allo-_(3TMS)_370722.56_PRED | Threonine_(3TMS)_370274.69_PRED	1.24764231522915	1.2001506543126	1.20681742519889	1.15498251301789	1.20561193669128	1.20673662943345	1.16977648448604	1.21339923877558	1.213677176697	1.22417566541526	1.2257874999502	1.15088496402289	1.19151446718042	1.18266453172245	1.16255556144992	1.12732238873877	1.16633805080162
Aspartic_acid_(2TMS)_458076.97_TRUE | Threonate (4TMS) [MP-1.1] | Threonic_acid_(4TMS)_458765.47_TRUE	1.37753367753058	1.37109284297009	1.31109319597724	1.33285968440471	1.39698257875779	1.38957642860521	1.28038292653911	1.30055205748698	1.35860640555179	1.38994687937141	1.45128824690204	1.26761496541344	1.3608518998798	1.35014957700601	1.34430309434306	1.33095008572053	1.28661657756027
Inosine_(4TMS)_904803.88_TRUE	1.05856251127258	1.16192630658725	0.929084784953178	0.941866174354549	1.05806956389142	1.0112901154747	0.911328838098097	1.06780970584705	0.822122293962043	1.08718245309113	1.19214386974093	1	1.03670542150291	1.14131123215122	0.97892414774579	1.13470652325938	1.01132937622723
Dehydroascorbic_acid_(2MEOX)_BP_639171.94_PRED	1.34670986567231	1.33549765325232	1.26672557597416	1.25812802639658	1.3289542018941	1.27745096626623	1.2401483179241	1.22118798878379	1.2820483275417	1.28343451481613	1.22947710808022	1.24553778429378	1.29012719468496	1.27771922386042	1.20193267412657	1.25607490395164	1.25245971213398
Erythronic_acid-1,4-lactone_(2TMS)_462181.38_TRUE	1.36556174770437	1.36395236419202	1.29352216959817	1.31149947084765	1.39793022155112	1.36663702807358	1.25892711720954	1.28413333708666	1.32467363195712	1.37868225637654	1.45009402933252	1.25158599452403	1.34503976772932	1.34119441711925	1.32980314209309	1.32063596090906	1.2745907268882
Glyceraldehyde-3-phosphate_(1MEOX)_(3TMS)_BP_571519.81_TRUE | Glyceraldehyde-3-phosphate_(1MEOX)_(3TMS)_MP_577300.12_TRUE | Glycerol 3-P (|Glycerol 1-P) [MP-1.1] | Glycerol-3-phosphate_(4TMS)_574746.69_TRUE	1.06045844407086	1.0512096162682	1.02213494618375	0.986051133839607	1.14666227076317	1.10223040363091	0.975718835525026	1	1.01266219897772	1.10747816261369	1.15239651057155	0.938772519664913	1.06179252049377	1.11035525885723	1.01602985672726	0.957879746652997	0.9831806473446
Rhamnose_(1MEOX)_(4TMS)_BP_570616.31_PRED	1.27778340656346	1.23258319618074	1.14732451146149	1.1950786840906	1.37440426423745	1.35601106975152	1.14303120319237	1.1271158610412	1.12595642664293	1.31176020322723	1.29683000065522	1.13816786908193	1.20735360053679	1.24191026192975	1.0499260659435	1.12272089630235	1.20861070142558
similar_to_Asparagine_Derivate_505075.09_PRED	1.31480244388032	1.28826656503926	1.24916148692333	1.23610227814046	1.32283510095394	1.32189321225626	1.22386248140012	1.20799311014089	1.22435142642018	1.31660857989848	1.28309815294617	1.20730630761347	1.24506170990531	1.20751013514251	1.23096704698813	1.21455870918249	1.19810162521903
Tartaric_acid_(4TMS)_511834.44_TRUE | Xylulose_(1MEOX)_(4TMS)_MP_509094.19_TRUE	1.2890437862888	1.24193870519148	1.24913237742299	1.24234496946704	1.27334230429925	1.32514533630878	1.22792495846764	1.21469337182648	1.23586614163622	1.29789690650153	1.23802444972422	1.21406902304733	1.21988512262285	1.18802717537679	1.19836043238067	1.18528143372371	1.17531924120396
Lysine (3TMS) [MP-1.1] | Lysine_(4TMS)_616386.69_TRUE	1.18165421995121	1.1563734402651	1.10971480886524	1.1312656744081	1.22948687902354	1.28196528507492	1.06762113046293	1.02407304493228	1.18768578112924	1.23496789754217	1.20905405039476	1.1253530068317	1.16948355771594	1.1543638102164	1.16843530230555	1.18031240145546	1.10228998363734
Tropine_(1TMS)_336960.03_PRED	1.21592457059475	1.1896819335416	1.15825770022784	1.22619568542237	1.19127396512001	1.29387841697423	1.15649224393668	1.14749482393842	1.12752903681803	1.22501832932033	1.23123334338161	1.1579291379592	1.14650694299845	1.1699394491357	1.15658001752264	1.15545894935613	1.12248996833354
Butanoic_acid,_2,4-diamino-_(4TMS)_519172.62_TRUE | Putrescine (3TMS) [MP-1.1]	1.09261806132714	0.962058774551311	1.1572832140676	1.04139549815527	0.9419664118642	0.957503972946237	1	0.887305726887765	1.19388315666353	0.972856716374916	0.949187756430991	1.07063135794325	1.07669506634307	0.985183428165309	0.958966333787605	1.02078061977123	1.03746794338758
Ribose_(1MEOX)_(4TMS)_MP_503578.66_TRUE	1.26792434840938	1.21849324384119	1.23881909272699	1.2295026196023	1.24295810047848	1.31931740182289	1.21456907872238	1.20112391738329	1.22099566320736	1.28093112394673	1.21498921685995	1.18983763726786	1.20426239869972	1.15953928461447	1.18203917024539	1.16742709307427	1.15351656792565
Malate (3TMS) [MP-1.1]	1.22096928022893	1.1476936198181	1.14825950181902	1.10374775983147	1.18954314810568	1.215322816385	1.09492485122177	1.04620644043675	1.14315281400877	1.17147603264354	1.17558929859289	1.0794212049435	1.12282771668688	1.08415692156405	1.05981945669894	1.06318632188908	1.07736964051205
Adenosine 5-P (|ADP|ATP) (5TMS) [MP-1.1]	1.2002171889624	1.27984321356634	1.19971981387783	1.27973660582058	1.00764475777042	1.29594010214949	1.20332201830944	1.27694722054004	1.23764149525167	1.29556079005802	1.31651202206981	1.10576006266619	1.13363744062699	1.26532638720594	1.24122832322839	1.25144766452936	1.10496142259695
Mannitol|Sorbitol (6TMS) [MP-1.1]	1.29874220917527	1.1708621519484	1.21724502950671	1.30715575854929	1.19821208646506	1.35515467359525	1.19306431750735	1.17659196502825	1.34300525186016	1.30448448696786	1.24897411770868	1.24564186268376	1.23554925122242	1.21571381985741	1.24233238986924	1.20486822777425	1.15935849726881
Octadecanoic_acid_(1TMS)_770496.62_PRED | Octadecatrienoic_acid,_6,9,12-(Z,Z,Z)-,_n-_(1TMS)_768264.69_PRED | Octadecenoic_acid,_9-(E)-_(1TMS)_771147.94_TRUE | Octadecenoic_acid,_9-(Z)-_(1TMS)_769944.38_TRUE | Stearate [MP-1.1]	1.16656425299488	1.21595045774963	1.27311448648451	1.32302829565128	1.13136238009097	1.29244549173032	1.1571121881928	1.14289193371445	1.28576119753093	1.29904431382274	1.24713318868801	1.19365641576582	1.12433399953098	1.17674410230042	1.24637916438747	1.16164769695872	1.12688446678688
Glutamine,_N-acetyl-,_DL-_(3TMS)_655207.31_PRED	1.11313440831105	1.06562710880922	1.07985259559254	1.07376991699447	1.07968494849971	1.13996229057961	1.06515925474153	1.09046531146602	1.10337824459046	1.11670577069104	1.05887318108355	1.08525259814148	1.06187114876111	1.06667200033583	1.03636822529858	1.03814428636676	1.02057964826141
Propane-1,3-diol,_2-amino-2-methyl-_(2TMS)_245096.62_TRUE	1.18621220088898	1.34249406596604	1.13227146017237	1.09689819946401	1.13409172535784	0.994802202884092	1.1886207767295	1.25068608821847	1.13551754233279	1.12383112018422	1.16800395698193	1.10755987071479	1.21294080027316	0.925401456141414	0.872882221432465	1.02424043749282	1.14446626423832
Homoserine_lactone_(2TMS)_458933.88_PRED	1.28724454882529	1.29197893011229	1.21618459639537	1.23273775706268	1.32175526964337	1.29315615013628	1.18897374109911	1.20490036158738	1.25531299582101	1.30252736930461	1.37707849823276	1.17616670558968	1.27747037318082	1.27362420497195	1.26358662597928	1.25244432837124	1.21075626212984
Citrate (4TMS) [MP-1.1] | Citric_acid_(4TMS)_594326.44_PRED	1.25835575794306	1.17684306691272	1.134719017348	1.17367001041987	1.22197352773994	1.2408321978143	1.14682795490884	1.15712334522718	1.19449861717977	1.22722370566757	1.24129973337483	1.16040543747818	1.15533482643997	1.19498482872086	1.20727314020285	1.16242742769362	1.16447897751763
Pentadecanoic_acid_methyl_ester,_n-_620606.38_PRED	1.2402150425451	1.23828360398642	1.16262361453709	1.16571916070604	1.22762655928212	1.18276829878014	1.12545865810743	1.12500787818343	1.17231622802128	1.21197031892074	1.18511046088954	1.14639075672651	1.20665901250776	1.20137725399229	1.15971832226902	1.18472328774841	1.16192993192067
Hexadecanoate (1TMS) [MP-1.1] | Hexadecanoate|Hexadecenoate, 9Z- (1TMS) [MP-1.1] | Hexadecanoic_acid_(1TMS)_697328.75_TRUE | Hexadecenoate, 9Z- (1TMS) [MP-1.1] | Hexadecenoic_acid,_9-(Z)-_(1TMS)_696619.5_TRUE	1.18616596546701	1.15537886101591	1.26910768528574	1.28306312439944	1.14362444124731	1.26329534974999	1.17573008592295	1.16207172619199	1.32571858460468	1.25529159020329	1.2140198925113	1.18743002633598	1.118829286605	1.14153853907779	1.25730607802018	1.12380893683334	1.11476505233729
Glycine,_N-acetyl-_(1TMS)_334790.31_PRED	1.15838004834108	1.12755649434446	1.13750755776652	1.20032692552423	1.13039862390581	1.26873279627328	1.13527683088023	1.12923024501801	1.10987613870259	1.16783093691364	1.18553459885754	1.13815255285415	1.10417608739466	1.11233463971076	1.08967029135512	1.09387157078022	1.05895504466885
Mevalonic_acid-1,5-lactone_(1TMS)_454636.47_TRUE	1.24951890028879	1.25498717474425	1.18624161638299	1.20885385679488	1.27982926127445	1.25850717183225	1.15758407762815	1.18095188217372	1.21395285767169	1.26769774652649	1.33547674562256	1.14826370706969	1.24083182771694	1.23622045140921	1.22691348240381	1.21786217334251	1.17038370006363
Tridecan-1-ol,_n-_(1TMS)_547762.06_PRED	1.2122375728172	1.17303270430775	1.26247582004976	1.2660444812241	1.13321355780051	1.27967082880869	1.24969256084516	1.29570943784395	1.32832480821269	1.2102016160475	1.15885676646816	1.18634305293181	1.16192958432434	1.16327468410426	0.903697594671398	1.06773371301643	1.11152336643423
Valine (2TMS) [MP-1.1] | Valine_(2TMS)_272492.56_PRED	1.17550941181102	1.14753433443107	1.15425219014139	1.09869250281682	1.10419410442409	1.12309255711185	1.11121729024959	1.13051725695243	1.17378518738029	1.15371180101886	1.13078722311003	1.12283599165456	1.1421083802916	1.11879711263889	1.12262515119164	1.0609963568803	1.12610740686672
Nonadecane_653263.69_PRED	1.06818618136137	1.01267037051824	1.06110529509017	1.06167767234702	1.01113609294291	1.12521517580271	1.05194198666077	1.07087698313006	1.10060777123368	1.07894547462571	1.02448574534842	1.05198035688098	1.01866020355186	1.00519828223	0.999863179019985	0.979349401187769	0.964902107916868
Serine_(2TMS)_328955.09_PRED	1.12396134439742	1.09008177171569	1.09433715739405	1.15982140191931	1.09243733938037	1.22757473619601	1.09176324324964	1.08640702532541	1.06988966665816	1.1363173312284	1.14267229775754	1.09473558868043	1.07026908933633	1.08256550416323	1.06644216353055	1.06290196579227	1.03515282765239
Cinnamic_acid,_3-methoxy-,_cis-_(1TMS)_587950.5_TRUE	1.25749318939686	1.16292651790646	1.23666959117385	1.28203073277083	1.16638145183458	1.33044546486778	1.23027895755202	1.2415664890329	1.33121351599939	1.20759792345123	1.18125107468951	1.20822233807246	1.15198969396269	1.13297727514807	1.12804088879757	1.11296956981951	1.10147576778862
Leucine (2TMS) [MP-1.1] | Leucine_(2TMS)_306195.44_TRUE	1.08762055992932	1.04978012091269	1.06039147650589	1.04144835099333	1.02366031691297	1.04290696871589	1.01638759764251	1.03259958479669	1.08973196521838	1.08192432942129	1.03830056784297	1.02056120302165	1.08051996821311	1.0929287751572	1.05083716039404	0.992624972185795	1.04540626380861
Glycerol ((3TMS)) [MP-1.1] | Glycerol_(3TMS)_292962.19_PRED	1.1782842040108	1.1094127182078	1.10213969085086	1.09614557123279	1.13793289039387	1.16615916108173	1.10815201176574	1.10737594746037	1.13621296045091	1.16110306896072	1.1315193133168	1.09880792641861	1.06372153045495	1.05250669987398	1.09432864531808	1.03676835898596	1.09906010693249
Proline, trans-4-Hydroxy- (3TMS) [MP-1.1]	1.07376631924237	1.11923359620149	1.08837549102102	1.15381210633429	1.10422980479862	1.08233177175891	1.0795306402953	1.0519609574946	0.989772495662168	1.08747783024841	1.13406409906054	1.01401215988701	1.0232876831427	1.18844711695012	1.14022503375422	1.16808554931445	1.06649001230271
2-Piperidinecarboxylic_acid_(2TMS)_375026.84_TRUE | Maleic_acid_(2TMS)_373998.81_TRUE	0.991082061219413	0.995652799209595	0.860196845352824	0.88383118459088	0.938803664315472	1.02724054866351	0.902389886795756	0.830429547247501	0.823241912945348	0.984763738972527	0.941673883325856	0.885648706428019	0.88567204005421	0.926108544457137	0.87655220636609	0.88265392814102	0.87895895510236
Valeric_acid,_3-hydroxy-3-methyl-_(1TMS)_235895.11_PRED	1.08193670744813	1.24345698891947	1.02025293884482	0.993556919206827	1.0308484874335	0.896306282729304	1.08847876859214	1.14215094256651	1.02548811500123	1.01260423123418	1.07062050449426	1.00590221978666	1.11609480548718	0.829042446850974	0.775680472334775	0.927424926076354	1.05267101412771
Hydrocaffeic_acid_(3TMS)_667708.25_TRUE	1.10040724584523	0.926183197410412	1.04976799718546	0.981361404224219	1.11330418558703	1.1279997289093	1.06595806771147	0.956338559564893	1.06944989732448	1.13026807084574	1.007701618177	1.00908565959103	1.10004584255859	1.07568509790888	0.625564022559368	0.50756553151915	1.07983455612343
Methionine (2TMS) [MP-1.1]	1.05104735198059	1.0403472897893	1.02502032651145	1.06011207776905	1.03483199939147	1.02713257557905	1.04887666483151	0.999457496728626	0.99595753219559	1.04686762290022	1.03944292364664	0.93059469215857	1.01016783038042	1.08160939913465	1.06682801550603	1.06121831066763	1.04712329803951
Docosahexaenoic_acid,_4,7,10,13,16,19-(Z,Z,Z,Z,Z,Z)-_(1TMS)_907201.25_TRUE | Docosanoate (1TMS) [MP-1.1] | Docosanoate|Docosenoate, 13Z- (1TMS) [MP-1.1] | Docosenoate, 13Z- (1TMS) [MP-1.1]	0.845861461967989	0.962163488208288	0.736831909090933	0.747912697179888	0.864112457720233	0.804728910898098	0.702883386876286	0.871356110736733	0.638415424011173	0.891258125460106	0.99288256539442	0.808219622851559	0.840781232995967	0.948831956163663	0.791935940269214	0.95200905549411	0.833200982927833
Hexanoic_acid,_2-ethyl-_(1TMS)_254181.88_PRED	1.12766089048486	0.902357953337935	1.16090299362417	1.18510806357964	1.01405778360051	1.1687366490255	1.13843408765107	1.16291303553658	1.20531543459138	1.10463631673597	1.05843591718037	1.08295095509915	1.02637973524257	0.969653346931514	1.06514953158471	0.951066057522166	0.931796076059221
Nicotinamide (1TMS) [MP-1.1] | Nicotinamide_(1TMS)_515482.47_TRUE	0.965916779038158	0.881052130752409	0.848861784074569	0.825384223518762	0.970857513108118	0.978981641563587	0.837983340410536	0.855683060597492	0.815825935188842	0.966611067729073	0.919384984335734	0.852448928151261	0.899165659143516	0.8920122048413	0.833395713022558	0.864528870344896	0.922346759773458
2-Piperidinecarboxylic_acid_(1TMS)_357365.44_TRUE	1.05367084094512	1.08173199368851	1.00618947670068	1.00791437820908	1.08857270894796	1.06083224846822	0.941365045375653	0.957854862063973	0.972496988149001	1.09218137554892	1.10007689193865	0.958863233967149	1.01087569216055	1.06647381866984	1.04602362233785	0.992674788522835	1.01730675706898
Fumarate (2TMS) [MP-1.1] | Fumaric_acid_(2TMS)_371909.34_TRUE	0.970392943818612	0.970399375759557	0.815997843787249	0.84703189459322	0.917824913550123	1.00133850164973	0.884357428294483	0.791847166491436	0.805454574979366	0.963681580610671	0.897852733236244	0.866581414491574	0.853756644893047	0.900575769516051	0.840775665081412	0.854961278491817	0.845604704227989
Methionine_(2TMS)_474948.12_TRUE	1.04588329011767	1.02986677528305	1.00815812898836	1.0471746860475	1.02317601201972	1.00970498479665	1.0413820759094	1.00090066869849	0.982187654142114	1.03222188506176	1.0221552471422	0.926973032434838	0.994348646975371	1.06507162341748	1.0527244928978	1.04939342062706	1.03320257093962
Homocysteine_(2TMS)_506276.72_PRED	1.1087264822543	1.06255120534025	1.05660395079198	1.04734897634972	1.09300330329748	1.12235764704593	1.04034344747777	1.01843609735756	1.02386629718416	1.11994532706473	1.05908655766476	1.02827618436391	1.05060716349266	1.01170102179974	1.03719170935527	1.0193993896461	1.01224253210621
Malic_acid_(3TMS)_442513.44_TRUE	1.04434731902913	0.992177962735243	0.981018780643611	0.93251010054988	1.03888213066618	1.0304209329207	0.921918747916039	0.871656478641353	0.951923496898246	1.00955168288576	1.01840471500458	0.914205128137511	0.964285121038182	0.929038709279904	0.900061097212146	0.907924952767939	0.928115450559071
Levulinic_acid,_5-amino-_(1MEOX)_(3TMS)_MP_574704.06_TRUE	1.06248787653032	1.03037228757785	0.922227080093692	0.973983333375897	1.17916369084418	1.12219024289634	0.911884401208548	0.913510125163333	0.889956993896623	1.10234126487456	1.09252291808359	0.923814545871443	1.00245986179515	1.04777115026953	0.84661819493141	0.924531955415289	1.02124991291518
Isoleucine (2TMS) [MP-1.1] | Isoleucine_(2TMS)_318827.91_TRUE	1.02716865707234	0.981636666424444	0.986894676650666	0.965807055169343	0.947932433507223	0.925576166842853	0.942372017199262	0.948724469694142	0.988161605628321	0.989389227835037	0.950904531128053	0.969934028046374	0.982049276311585	1.00277633908117	0.989429609143504	0.939617535577256	0.990252801732958
Asparagine (-H2O;2TMS) [NN-3.1] | Asparagine_[-H2O]_(2TMS)_494442.75_TRUE	1.09290028405804	1.10806284515888	1.02824608002194	1.06159208744362	1.0536700885395	1.03715762610198	1.01842022748872	1.0033700185105	1.01212740341323	1.09002906736536	1.042271952216	1.02138287081145	1.00547558398067	1.00849865533829	1	1.04154855297738	1.00508034794116
Alanine, beta- (2TMS) [MP-2.1] | Glyceraldehyde_(1MEOX)_(2TMS)_MP_277992.03_PRED	0.974318758994937	0.967073272542519	0.949244372141085	0.997361873930306	1.00187967081787	1.00087075341631	0.941365045375653	0.90567963749378	0.973191552494923	1.03322215746334	1.00820788930669	0.889300589098737	0.961761182005722	0.897799625378553	0.959437462985644	0.889128409625263	0.922233326596245
Fructose (|Psicose) (1MEOX;5TMS) [MP-1.1]	1.02656063747186	0.963207165315434	0.995282578705413	1.09369292257609	1.01326401368178	0.860510639146197	1.06690557267132	1.09412879894367	1.05604653772454	0.919812845033955	0.856642476311588	1.1138440608825	0.965371961467448	1.11351240660188	1.08389535179659	1.09085912634838	1.10055545134619
Succinate (2TMS) [MP-1.1]	1.00242269321173	0.976191715534595	0.917218292192135	0.877131513562154	0.991048879244965	0.967835265692555	0.858022535144808	0.866112339520228	0.838454215131726	1.01751119383754	1.00063169387073	0.853517210279231	0.924907534301746	0.902386699343909	0.918194331161179	0.895582708886285	0.926587849804414
Phenylalanine (2TMS) [MP-1.1] | Phenylalanine_(2TMS)_531431_TRUE	0.976549927238254	0.951652575163769	0.892931826898408	0.904713169232681	0.994360987546389	0.931635666317521	0.970236610192353	0.90040702984448	0.898824711075928	0.963526067952621	0.994221547309333	0.858909952895223	0.930426255330882	0.969859187144144	0.966015093779131	0.946301387430523	0.939781842549195
Arabitol_(5TMS)_503104.56_PRED | Ribitol_(5TMS)_503667.69_PRED	1.05864494672425	1.04209233699548	0.997936841099772	0.972821361733214	1.07381241671392	1.03519675524844	0.970914873453336	0.960590629383414	0.944830580502757	1.0654839531811	1.03597112353136	0.956010465145818	1.00412141967462	0.976683424602987	1.00080497636297	0.986017142504689	0.975726221437381
Nicotianamine_(4TMS)_902113.62_PRED	0.782302579773487	0.897304198048001	0.649692924248946	0.669973980906263	0.785311097605623	0.726214106593902	0.603455863458168	0.783646548638373	0.549111774994884	0.806242351020721	0.930803287491266	0.7313453974155	0.768267335820763	0.8825436216193	0.714555623923941	0.884416689214974	0.746496572414044
2-Piperidinecarboxylic_acid_(1MEOX)_(2TMS)_549118.94_TRUE	1.045942114224	1.02148673706665	1.08914733764044	1.09344350188153	0.991894272781783	1.10844924351748	1.0773984785868	1.11969415145741	1.13994493445307	1.04683498525563	0.994754285340514	1.02671011774723	1.01711780467307	1.0225961848357	0.774317650846575	0.919736752101933	0.963985762241395
Tyrosine (3TMS) [MP-1.1] | Tyrosine_(3TMS)_659029.31_TRUE	0.929173465593187	1.07421166003019	0.886696239044192	0.868523493036669	0.947225519475244	1.03764996223854	0.929083907864835	1.06718174334565	0.951408420513341	0.997412469678081	1.17220381138124	0.857389027372908	0.949057754577774	0.98978692168315	1.13770791320361	1.03766164815314	0.953688405370315
Docosanoic_acid_(1TMS)_904290.44_TRUE	0.756204818806951	0.881504909262641	0.672448529918872	0.685772573613009	0.790906323623147	0.741846847100238	0.633576398654832	0.776975098879737	0.584866547389382	0.815449112189374	0.914427935675468	0.741633425432783	0.767828243540178	0.872009271719512	0.730195497276517	0.872516203462333	0.756868336502844
Hexadecenoic_acid_methyl_ester,_9-(Z)-,_n-_652277.12_PRED	0.88398555243498	0.854411949502798	0.857349760220925	0.830648501718976	0.872112152040158	0.892731484789039	0.846305773455746	0.857376010668748	0.86835758253169	0.899389106235877	0.839226989599119	0.863584697901601	0.854022285386842	0.868255856876962	0.831536168375754	0.839559027011591	0.824492700229525
Butanoic_acid,_3-hydroxy-_(2TMS)_249401.72_PRED | Butyrate, 3-Hydroxy- [MP-1.1]	0.920009140827549	0.965730639742572	0.880700723157154	0.891025193634388	0.921768266533488	0.844003303135792	0.867472042413142	0.785564024697199	0.885076001870601	0.848412855489251	0.840718197092026	0.889239649586805	0.805193622950642	0.871956614497949	0.879358300307754	0.863849984810019	0.894795587725145
Cysteine,_S-methyl-,_DL-_(1TMS)_354018_PRED	0.938868122546325	0.968636269540227	0.910416886139404	0.876506084873945	0.980360835076213	0.933943198766421	0.845511955682936	0.837631226555299	0.84193994760933	0.983731520392729	0.995173725716275	0.83432444957526	0.901392725265593	0.957007161225262	0.941852864149211	0.885780100602763	0.916915751752845
Arabinose_(1MEOX)_(4TMS)_MP_498992.12_TRUE | Lyxose_(1MEOX)_(4TMS)_MP_498323.69_TRUE | Ribose_(1MEOX)_(4TMS)_BP_501489.22_TRUE | Xylose_(1MEOX)_(4TMS)_BP_500236.69_PRED	0.869348550876288	0.91849010660076	0.804954781142351	NA	0.867609729893503	0.859635574944002	0.807000219604669	0.830204625676535	0.738502546554462	0.883148042397024	0.880405238821886	0.813677710907035	0.845496045258348	0.869355958524214	0.81116011988877	0.854903829496405	0.850966491667013
Cysteine_(3TMS)_479326.28_TRUE | Pyruvate (1MEOX;1TMS) [MP-1.1] | Pyruvic_acid_(1MEOX)_(1TMS)_222801.88_TRUE	0.706409376299752	0.695211323773669	0.668365616740661	0.701118494516843	0.838451190745706	0.760630783098803	0.695109850117406	0.671288279680284	0.646397747681866	0.831194207787734	0.772255914107069	0.650058913383915	0.722243504164944	0.776295673811066	0.74126034781993	0.795625018125447	0.686808042376445
Heptanoic_acid,_n-_(1TMS)_255612.95_PRED	0.989483824844166	0.79920020931903	1.0349443895495	1.0489003112239	0.895880682638409	1.03274443460671	1.01188794279011	1.05298218871546	1.07574583500116	0.984610051934011	0.931507862397304	0.957505103490198	0.912269611492213	0.864966524033657	0.95373056409111	0.843269391024981	0.837271400600187
Galactopyranoside,_1-O-methyl-,_beta-_(4TMS)_598177.19_TRUE | Isocitrate (4TMS) [MP-1.1]	0.884358717827585	1.08077559860426	0.942867194639592	1.02843804871728	0.783303458117099	0.946185599399775	0.98192363253563	1.07528470573588	1.12226769348545	0.992182225908349	1.04465645601349	1.04736752063777	0.906022815620221	1.06622576201685	1.24301314551849	1.20911804251094	0.998306550686281
Butanoic_acid,_2-amino-_(2TMS)_249223.84_TRUE	0.983800202174155	1	0.938237408218391	0.965728526421517	0.946693429903367	0.923623667540914	0.881405733302402	0.910514827863969	0.93194273416087	0.931956635765579	0.938111937412858	0.902097580563946	0.910911613670104	0.936963142551841	0.930026147904154	0.947992086208058	0.938747623271751
Isomaltose_(1MEOX)_(8TMS)_BP_915618.31_PRED | Melibiose_(1MEOX)_(8TMS)_MP_914184.5_PRED	1.05569130596932	0.842673571830796	0.928497428345009	0.802079783635132	1.04603478654483	0.713313688154977	0.923748172792994	0.859822915036056	0.887191792824962	0.800432001840144	0.659871781498936	0.968709396411555	1.02043945717254	0.911013336212627	0.330665013633811	0.490386703179498	0.993379747592898
Glycine (2TMS) [MP-2.1] | Glycine_(2TMS)_226792.3_TRUE	0.986569354226692	1.41140610086358	1.27866011668985	0.845475979171362	1.24570089537104	0.963645073415816	1.3747614799002	1.48795550013418	0.669458248416736	0.950721105124879	1.20479701418904	0.830312393487679	0.627825520064688	0.809823716402214	1.01397914083764	0.722149731866856	1.17173427302094
Pimelic_acid,_2,6-diamino-_(4TMS)_654293.81_TRUE	0.817759441899006	0.795451092978455	0.822912757364295	0.795685169124578	0.793332111711523	0.843324539836499	0.802624894841344	0.81250919109135	0.821987515103257	0.842041270576924	0.785281700611018	0.815522126848644	0.791212391279209	0.812697003721258	0.786837413170765	0.776759829192079	0.758688756107106
Lysine_(3TMS)_631402.94_PRED	0.990291258003156	1.00181836860092	0.910416886139404	0.881086496552408	1.01023654367727	0.907844364696402	0.887031813097697	0.868996434278408	0.91228429573578	0.943042081439564	0.900870224463261	0.903717200660396	0.977537096142873	0.965723757120417	0.893164644012073	0.946565160902882	0.94062934824465
Glycolic_acid_(2TMS)_204397.8_TRUE	0.991436832372435	0.952207768032294	0.945526078726455	0.897419853110166	0.987788796323466	0.973472332243381	0.903448809892551	0.85744081724278	0.936795238649244	0.969493623946872	0.956966507208492	0.904334839144206	0.91847808219547	0.925573724998707	0.951479946073349	0.899157329758222	0.93526790477699
Fructose (|Sorbose) (1MEOX;5TMS) [MP-1.2]	0.93017866906022	0.886061658931019	0.924813596504035	1.00881920212725	0.930796280364088	0.763209999950759	0.995364398315492	1.01180560421946	0.963989312736052	0.839889177196875	0.762719552028409	1.03900621504459	0.897149913900691	1.03519300722407	0.999644032679432	1.02154531924863	1.02853337271102
Mannopyranoside,_1-O-methyl-,_alpha-_(4TMS)_559825.75_TRUE	0.969877941734177	0.863727335080693	0.97443683005487	0.937400328157301	0.97481489082495	1.05387353442461	0.97699788299782	0.901023095547421	1.02518098567605	0.978527411245413	0.934238812533044	0.952340444969891	0.976157702476162	0.950917508108653	0.71687072655675	0.754556916058902	0.881967545625758
Pentadecane,_n-_462471.41_PRED	0.992731920364821	1.01135743510699	0.936172042820401	0.931685883103111	1.03343967725934	0.978458212809743	0.895243940557271	0.903669370207691	0.944830580502757	1.01532090103773	1.0884971966588	0.890897958592697	1.01322587931616	1	0.993559168072119	0.987308625930402	0.941405206370829
Fucose|Epifucose (1MEOX;4TMS) [MP-1.1] | Rhamnose_(1MEOX)_(4TMS)_MP_517543.41_PRED | Fucose_(1MEOX)_(4TMS)_MP_522432.03_TRUE	0.836223809391877	0.889481978120536	0.758813873799014	0.800333158654711	0.859320181562064	0.719994790980926	0.81697709016242	0.794320342513232	0.791444477463872	0.770419504000154	0.824610623231216	0.776395333190009	0.791084541869734	0.834726088834807	0.762488839307348	0.82295147443536	0.825223021047798
Ornithine-1,5-lactam_ (2TMS)	0.779667388129437	0.719587950714586	0.663600430305144	0.71137966035461	0.795972354621124	0.762884327091488	0.586541761798658	0.510575449675945	0.658517849049067	0.81517334696489	0.815847942188766	0.690260444612668	0.765541441559046	0.796495894183703	0.806535270117482	0.777726356547339	0.742587178837472
Pyrophosphate [MP-1.1] | Pyrophosphate_(4TMS)_556794.69_TRUE	0.98524420234568	0.659647832623478	0.996051833156943	0.914284393046592	1.04708136130904	1.09391278453168	1.01795314708576	0.866359543886079	1.08666825518334	1.00776259096576	0.923639054364934	1.01455020157736	1.03325497147817	0.987077141525128	0.377159686900111	0.565726996287574	0.884096895032966
Asparagine_(4TMS)_BP2_626664.06_TRUE	0.960867282939447	0.975098584414556	0.892360557557524	0.886917049459993	0.960514325772998	0.887202308699198	0.858595982358372	0.875458928234184	0.892021752146709	0.957711233641543	0.924999660774637	0.883501240880844	0.947887143180953	0.954497946867695	0.913927521341406	0.942327073710574	0.921664981524753
similar_to_NA_(Hexopyranose_like)_623755.44_PRED	0.94843138394314	0.975805063685763	0.882971871603595	0.854767349685386	0.962227637568035	0.866336948757218	0.832399693073191	0.854040554279296	0.862872266140179	0.935324234503662	0.914228477871072	0.866027645458322	0.939218608481904	0.94670329265791	0.894222535778735	0.936442847487927	0.899032397005493
Hypoxanthine_(2TMS)_659841.12_TRUE	0.782181771086693	0.757377920091814	0.605655017887736	0.647090484244427	0.628209737095731	0.803470291675319	0.566109285765927	0.622568282487053	0.463634399183567	0.843764783699824	0.874857289884998	0.55660950904673	0.62241872076757	0.694830090209168	0.768861459299264	0.657852494506996	0.741566668908734
Calystegine_B2_(1MEOX)_(3TMS)_BP_620736.44_PRED	0.938031140350225	0.9594201916038	0.886784709004775	0.86718633725668	0.962768013252499	0.864462653465701	0.843402606287709	0.835820403200004	0.873452940123335	0.922980635487039	0.905755556413692	0.860561132702068	0.929348069272909	0.93407835190001	0.897129346150258	0.921644784846669	0.894527119533664
Glucopyranose_[-H20]_(4TMS)_561007.94_TRUE | Glucosyl	0.92041291318674	0.90487231665831	0.906615719875222	0.839518177192905	0.932781040334847	0.912028411041363	0.84987151097676	0.897243400138865	0.850025538770048	0.892493747646125	0.88682313606376	0.871198539571791	0.883079519292341	0.84402952823517	0.826871840830845	0.866816382790561	0.839457387013702
Glucopyranose,_D-_(5TMS)_678044.25_PRED | similar_to_Glucopyranose_(5TMS)_677743.06_PRED	0.968413479046046	0.920915613415064	0.899460294834733	0.872121092420644	0.975078871365939	0.892200321458791	0.871848626079425	0.868996434278408	0.858992728180429	0.917505931720689	0.893513944646849	0.904110488154876	0.933842505270579	0.913909328073259	0.853547544753381	0.900665888017795	0.935011508337341
Glucuronate (1MEOX;5TMS) [MP-1.1]	0.825710634647941	0.799123719871058	0.784091111348204	0.765183438359012	0.825637051909011	0.804299225742034	0.749009125361661	0.750503568688349	0.791024817696369	0.83830138795821	0.824980231405692	0.7733294952	0.830180959314577	0.81220899502737	0.806882266087725	0.825923901914727	0.786001400920777
Guanosine-5-monophosphate_(6TMS)_1065235.12_TRUE	0.673215276179636	0.941258612020218	0.592389801011902	0.88722528155729	0.472954529718626	0.902118446173342	0.835480179470655	0.94206365225609	0.84193994760933	0.944392964464391	0.929161740795122	0.593895327204341	0.568346226250687	0.923087478580515	0.762601765050146	0.844620407988957	0.50695562236824
Histidine (4TMS) [MP-3.1]	0.792295617700529	0.630508596331798	0.674503129248086	0.807729329304697	0.695615642955359	0.910481813405713	0.533335214771208	0.514305962603218	0.884453264192875	0.910889278583417	0.854970637677197	0.760972291223956	0.888153361752871	0.829991917919695	0.82443152036999	0.773402311863746	0.66474507553817
Isocitric_acid_(4TMS)_597989.19_TRUE	0.76765254926276	1.03615064384598	0.81827473023859	0.872505303878573	0.650126792570443	0.850718995680049	0.842228397656789	0.988901112259043	0.980169305359117	0.916722867123744	1.0035579262562	0.814940101444105	0.810183578719519	0.915318460891401	1.17367497926407	1.14413514759817	0.82768656321964
Propane-1,3-diol,_2-amino-2-methyl-_(3TMS)_305353.78_TRUE	0.8420717579103	0.833506035255672	0.825476575015083	0.820844626262426	0.792755906093438	0.789643906974681	0.783952583603739	0.778566527802559	0.838040082956811	0.856362905164952	0.803937622217098	0.791582608839015	0.847805528834486	0.866442462283651	0.827217573223855	0.774435496700597	0.826899541624688
Galactonic_acid-1,4-lactone_(4TMS)_619566.38_PRED	0.820305402994642	0.792853057011756	0.769676131682744	0.738963374961809	0.809257448476549	0.808003528724824	0.728072766922885	0.761570176873153	0.742362832353698	0.818957522650322	0.826926230979477	0.764619192016229	0.809495995893333	0.792019351479296	0.787276388180231	0.809589474777447	0.758072762394405
Glutamine ([-H2O]2TMS) [NN-3.1]	0.658727824216681	0.68175675371073	0.708743711362956	0.693632189415704	0.629698819113229	0.66518289633792	0.721878910625382	0.676676994830284	0.663764750215917	0.746327280821179	0.77654418540323	0.639084743990785	0.66570695507445	0.715719030654561	0.866661871755335	0.700685807829586	0.635383386259644
Ascorbic_acid_(4TMS)_652392.44_TRUE	0.795623644413051	0.778730023109649	0.770948792561424	0.726467324769162	0.781195102550488	0.765112640036086	0.73146316243108	0.750157712484912	0.746478367852906	0.795662314113021	0.747191277128464	0.755466453897649	0.767314538482039	0.766911472725398	0.743426198314729	0.744371554709129	0.738890961322752
Histamine_(3TMS)_653726.19_TRUE	0.78137437514952	0.767718658135037	0.809487232938994	0.796829294062106	0.745508384885678	0.838005083284511	0.797674733503258	0.806300840422004	0.812648494120581	0.806904036064253	0.764449843214772	0.792314608820456	0.765020802087104	0.752201875742723	0.760328654207165	0.772315193004133	0.758927686116231
Tetradecan-1-ol,_n-_(1TMS)_592555.94_PRED	0.946203245976185	0.808975863989753	1.10743888444762	1.27323165645912	0.87776215956188	0.812721469050079	1.21502149817106	1.28413986381906	1.37619242886164	0.835294797210708	0.785975137539506	1.3980991238309	1.04102266399175	1.32264155955907	1.37856678461161	1.33058999545953	1.25018922282278
Glucose,_2-amino-2-deoxy-_(5TMS)_BP_620384.06_TRUE | Calystegine_B1_(1MEOX)_(TMS)_623873.94_PRED	0.91846290762665	0.935007290680107	0.840269114935958	0.837439000976304	0.929411257294933	0.843242932462276	0.795552461433782	0.794138268399044	0.824310849172898	0.910471899281891	0.883048405075259	0.83980607930057	0.904975520195328	0.918521240886334	0.86865126617805	0.898011249578159	0.8768445719065
Heptacosanoic_acid,_n-_(1TMS)_1053682.38_PRED	0.844510631992608	0.94400321938002	0.845943656870895	0.913170770049861	0.667278636588699	0.91044299406061	0.858157624692453	0.909587168563036	0.849047345954056	0.942576576968429	0.96940324493102	0.756190521108557	0.801262748979936	0.937106088526193	0.912065076322213	0.923530978249234	0.79241057456975
Glucose (1MEOX;5TMS) [MP-1.2]	0.835044043422184	0.937058581354944	0.936465290528888	1.06411494556922	0.741624502056072	0.850404287302372	1.00659848158629	1.08708644898588	1.15088440553001	0.870963224744839	0.898168986920094	1.15938269419505	0.909414835238699	1.11719246075977	1.22565990342904	1.18974762690582	1.05910294345127
Agmatine_[-NH3]_(3TMS)_578698.75_PRED	0.639419712204454	0.662276149879905	0.601154110934869	0.563915003176291	0.754560360275788	0.650689276547369	0.577928523649295	0.587063625693122	0.604586347459265	0.695274176323922	0.749195100424558	0.553364397884383	0.652699993523827	0.713364351923894	0.615818587507401	0.593345672514017	0.625303962736462
Hexacosane,_n-_908082.69_PRED	0.64403652166338	0.752142576871554	0.513647806935919	0.533278606627884	0.654597017412937	0.597962805341558	0.498505248108398	0.62371086540621	0.488444978105522	0.678132046383534	0.777563734449513	0.591154956441726	0.629809745318566	0.740112153948405	0.590070934753353	0.738945563960995	0.637040548455055
Cellobiose,_D-_(1MEOX)_(8TMS)_MP_862370.81_PRED | Lactitol_(9TMS)_862430.56_PRED	0.881778007846571	0.898041415640938	0.835973605213928	0.860383748206151	0.802674414668732	0.698507923142888	0.8096115154837	0.840705166695604	0.764432424538112	0.84238051798842	0.847730249225715	0.807421655530033	0.839822449658472	0.87650270916261	0.796330964642488	0.87550948853253	0.865452009561138
Fructose,_D-_(5TMS)_622992.38_PRED	0.894625746858724	0.920991459532869	0.837596131383102	0.819059085707133	0.91310765104162	0.81982475954271	0.795220120167624	0.772629372745688	0.809323689212194	0.882633898321914	0.867426699486881	0.812779431219909	0.886259131684694	0.892781534882603	0.851899864498126	0.878324803109859	0.860292828773523
Trehalose, alpha,alpha- (8TMS) [MP-1.1]	0.762844864884577	0.600588193541594	0.547562828859046	0.55710444580398	0.752523634317659	0.631777263851144	0.541432768747965	0.479177607692193	0.422300032944211	0.774962468683659	0.661005995184626	0.654820944278368	0.700321681503408	0.749328478498196	0.527536951040995	0.408895987594717	0.745722109250911
Allose_(1MEOX)_(5TMS)_BP_588062.44_PRED | Altrose_(1MEOX)_(5TMS)_BP_593442.75_PRED | Altrose_(1MEOX)_(5TMS)_MP_590452.62_PRED | Galactose_(1MEOX)_(5TMS)_BP_588777.81_PRED | Galactose_(1MEOX)_(5TMS)_MP_587519.31_PRED | Glucose (1MEOX;5TMS) [MP-1.1] | Glucose,_3-deoxy-,_D-_(1MEOX)_(4TMS)_589111.5_PRED | Glucose_(1MEOX)_(5TMS)_MP_591351.81_TRUE | Gulose_(1MEOX)_(5TMS)_BP_593076.44_TRUE | Idose_(1MEO…	0.938920309510304	0.785604631206477	1.11024420286166	1.28490453174805	0.857866097371353	0.758892546882108	1.22917097193718	1.29647446244553	1.39246116349322	0.788170407795241	0.718200149183609	1.41894468463873	1.03096243762895	1.34298687383547	1.40196524094776	1.35205033071458	1.2679721492632
Homoserine_(2TMS)_380616.94_PRED	1.05630433257269	1.52956280185202	1.31525595330049	1.0759704120521	0.984751321528654	0.912988966871661	1.28765376504947	1.3296925139271	1.09535791022113	0.865592455072403	0.804892687195079	1.06420608894772	1.04223218181379	0.846897237230311	0.812128759333877	0.801885501017051	1.28043620763964
Tridecanoic_acid_586610.62_PRED	0.916962460542366	0.757231900624887	1.07384789973233	1.24426682113164	0.836053121603678	0.768309926171923	1.18202104913197	1.25281474023979	1.34147129734515	0.770368938656627	0.700555682471171	1.36871397756049	1.00188378434154	1.29899989900971	1.35352883114635	1.3073649509528	1.22564985942751
Threose_(1MEOX)_(3TMS)_MP_432507.62_PRED	0.943541400328792	0.885736795958105	0.886637235558109	0.903019405793677	0.926939690063286	0.999795698493784	0.835403792219438	0.887691578350258	0.909814589904402	1.01142916209393	0.972355247016185	0.884838595505124	0.945780293687492	0.960601112679168	0.763333932119478	0.665643796468548	0.868313873191727
Glucopyranoside,_1-O-methyl-,_alpha-_(4TMS)_613929.06_TRUE	0.867878222946883	0.859483714568012	0.868028050637943	0.87109273528999	0.861514975574839	0.934494424410005	0.81214294698347	0.852050196339509	0.928500432346402	0.869540792248361	0.897413898104579	0.807837039432137	0.837011150503814	0.811379887479188	0.870350564354354	0.88506392198023	0.768274804749857
Indole-3-acetaldehyde_(1MEOX)_(1TMS)_BP_657093_PRED	0.722280106900131	0.701432483617673	0.689654067467501	0.676508107917726	0.727009401894448	0.724739098990159	0.689626522376433	0.688299382628247	0.67186294759043	0.735671386979728	0.690819792082768	0.699808051446999	0.696248106730979	0.721368251525713	0.698879649659585	0.696607496519584	0.682843457463638
similar_to_Diethanolamine_(2TMS)_335362.44_PRED	0.831025737869768	0.772421642081442	0.84969229681272	0.85741627761361	0.787704737425807	0.890812625752627	0.781255384435131	0.766813105746038	0.798547596769588	0.842617611183438	0.831929438824361	0.834186628504981	0.826738503855677	0.78742011720557	0.776617509179198	0.779642569320412	0.788327380669568
Glucose,_2-amino-2-deoxy-_(5TMS)_MP_600525.75_TRUE	0.725854962976564	0.986240400157263	0.797033135968333	0.837285223669295	0.621830985349094	0.776656494527396	0.812748802212734	0.923855972529655	0.928579331850919	0.874994709040473	0.952069539658702	0.783108534018949	0.758181537807	0.880403874842988	1.11922384183078	1.08927311270081	0.80346093752408
Ornithine (4TMS) [MP-1.1] | Ornithine_(4TMS)_572079.81_PRED	0.794571150216896	0.876482681065126	0.868354051478325	0.889040838947155	0.71236934038541	0.888441948455838	0.791863286056824	0.774966460691233	0.933872365044015	0.87976577516979	0.864416897310617	0.856952109329058	0.853800947007959	0.902693938855958	0.993331609487333	0.924060553864726	0.868925674601327
Serine (4TMS) | Serine_(4TMS)_459464.91_TRUE	0.878681343774307	0.909125794467194	0.843538311879757	0.833933062361114	0.944623460198122	0.862249309222452	0.788690447946416	0.809263078356938	0.816889269714835	0.911698088406218	0.999368306129266	0.785183287916596	0.901894852436862	0.915257439656715	0.898964570930116	0.894592150243441	0.844434043186227
Arginine_[-NH3]_(2TMS)_582688.25_PRED	0.896337954095717	0.726988593967374	0.775469980496532	0.89755456636626	0.810856638455831	0.940141795007244	0.700036526956422	0.616273967485002	0.900648626629628	0.948216491332127	0.896753575715858	0.835478004473793	0.889236706630315	0.881477158525237	0.892853748742915	0.864853744657452	0.783583287726111
Glucose-6-phosphate,_2-amino-2-deoxy-_(1MEOX)_(6TMS)_MP_785377.12_TRUE | myo-Inositol-1-phosphate_(7TMS)_788938.62_PRED	0.720326440250669	0.701700891555744	0.728698492580219	0.689142472141538	0.752386995349558	0.769692748084083	0.713034934783966	0.721116421626906	0.711046842803303	0.775356419084606	0.715529724505395	0.737390362296309	0.748532474018605	0.702375430453784	0.683041983248105	0.717718509552351	0.712163680155814
Docosan-1-ol,_n-_(1TMS)_890459.25_PRED	0.845373991804303	0.833160514324989	0.905419989420925	0.889743555052405	0.812923335878763	0.908001635966311	0.880391278340679	0.888844350616626	0.883696805401635	0.861494588545363	0.822788175673557	0.844996094456055	0.80436732719851	0.788765624342368	0.797618132210517	0.799047283290129	0.796014151306688
Xylose (1MEOX;4TMS) [MP-1.1]	0.847656947241525	0.87951823437715	0.800684521450206	0.80887516958224	0.898208732734986	0.915464930059089	0.792443107867774	0.790551707202047	0.742027193120394	0.885002938540591	0.839668897351663	0.754052552920022	0.815254073826523	0.868739716598249	0.823374683978266	0.844436829312335	0.851820743746722
Pyruvic_acid_(2TMS)_209817.64_TRUE	0.910472776700634	0.85052979025424	0.84110128142572	0.782748565931237	0.887058749090233	0.862249309222452	0.795457567992097	0.774562115440517	0.80946732677606	0.871021045045387	0.864711389921121	0.802130458304485	0.81756975994985	0.831540194832726	0.841974647163745	0.801766560238397	0.832570730255601
Melibiose (1MEOX;8TMS) [MP-1.2]	0.71071225922579	0.592855316366682	0.63853013390323	0.683927809084647	0.715104519333301	0.692680660817141	0.625512630492771	0.341698814455224	0.614014292147038	0.788490783669347	0.678986720770504	0.65211520965159	0.733715081988339	0.767206668164297	0.521693061871269	0.517875578221848	0.70886520350807
Adenine (2TMS) [MP-1.1] | Adenine_(2TMS)_679386.88_TRUE	0.713526703209896	0.70717870866718	0.729251987171214	0.670195423805663	0.708888346323044	0.769889512095871	0.652675027011939	0.645808848296275	0.68481695298781	0.760920996225984	0.834115783668382	0.655119089267486	0.697579940403304	0.695509671373469	0.73425554752298	0.695704109469605	0.665831392997205
Uracil (2TMS) [MP-1.1] | Uracil_(2TMS)_392037.44_TRUE	0.697494044043977	0.698178794314047	0.67319829965448	0.685976452302435	0.633184802199393	0.788106460792865	0.617329360039729	0.699843717508497	0.609748555274798	0.755400698348824	0.743525555307369	0.600468494868151	0.635150421503733	0.645387516893224	0.710983427266062	0.656517363255062	0.628128627251858
Galactopyranoside,_1-O-methyl-,_alpha-_(4TMS)_585464.62_TRUE	0.89607555787703	0.734642087490292	1.02396991245692	1.17506688808977	0.820736875388758	0.802404193208106	1.12003691786105	1.1920304771386	1.27992980929117	0.811549400989388	0.745513411158478	1.31323841295872	0.962747150346768	1.24201189535814	1.29987007129453	1.25104055491745	1.17051148374816
Dodecane_260776.19_PRED	0.828277005902421	0.64880852724705	0.890491654744346	0.872274869727653	0.755726286681289	0.861183069630833	0.863087502126899	0.906626952259019	0.89481455412815	0.824020065124355	0.785466885887636	0.81274837606263	0.776402530605702	0.719157513950408	0.810525366620112	0.711115148906189	0.675183991681353
Gulose_(1MEOX)_(5TMS)_MP_584150.19_TRUE	0.898898721598694	0.838547028340653	0.865564559790469	0.910336989869187	0.844197593117965	0.943655390940001	0.858629658983874	0.865244526280314	0.94266221700861	0.876430944142277	0.856025137049276	0.864868465974698	0.849903022608364	0.83807834071599	0.845176560173305	0.835375523621251	0.790985971514003
Aconitic_acid,_trans-_(3TMS)_600462.25_PRED	0.693001375385669	0.922876921745586	0.740443487346725	0.815816223068892	0.598503786415665	0.766637756937316	0.77684544320298	0.908851521953137	0.896675449165311	0.84295577473675	0.905172728524932	0.792418937972325	0.752265217790225	0.867067182106171	1.0557810663844	1.03907715626942	0.788412898097712
Dodecanoate (1TMS) [MP-1.1] | Fucose_(1MEOX)_(4TMS)_BP_528624.81_TRUE	0.767565441079243	0.786594236543214	0.884351172925395	0.775022098648849	0.778787157581454	0.699070146063972	0.756548610068571	0.748767816995511	0.77688016149111	0.72038243365245	0.76387497778383	0.791617533479144	0.692417186713459	0.745288463064946	0.792833645489522	0.746659212949413	0.753024398878037
Norvaline,_DL-_(2TMS)_302242.12_PRED	0.755276543927271	0.747981427752007	0.747148473119844	0.711022523253163	0.709940026114878	0.699518783688065	0.708600548884989	0.719218106677389	0.734007031560575	0.780352962710964	0.734784981513051	0.705415615923571	0.766799283783369	0.774845929397064	0.758545523853792	0.702289285194002	0.741945375949638
Gluconic_acid-1,5-lactone_(4TMS)_625723_PRED	0.817992333445154	0.857171829564233	0.765180031208662	0.754336171575293	0.842528808656436	0.739706998341232	0.707914628217673	0.713404005431814	0.745027745914251	0.812592283114619	0.792362581262198	0.747080184092971	0.814586641639937	0.831841454926332	0.782182449439889	0.824306083227425	0.791266281947712
Isocaproic_acid,_2-oxo-_(1MEOX)_(1TMS)_BP_289992.41_PRED	0.838352626572048	0.778385507393765	0.766201222922237	0.746086639921849	0.821074036201078	0.810584975831114	0.764016755921158	0.772322357554971	0.765569660977252	0.826146869792185	0.803270142413486	0.767356690507791	0.763374097979843	0.735841135508695	0.791318936506834	0.743413620225606	0.791657913847187
Caproic_acid,_2-oxo-_(1MEOX)_(1TMS)_326540.84_PRED	0.756574839805084	0.657152527610378	0.731107899664033	0.711320183842489	0.695172094192234	0.686617865100795	0.647765582126956	0.552391962091168	0.687751316332386	0.753966052258331	0.708777400334218	0.736254463968105	0.758259053943154	0.771956109962766	0.745564395437209	0.787870632038914	0.728141230692335
Mannose-1-phosphate_(6TMS)_785522.56_PRED	0.659195567017405	0.655410487909705	0.689054095663788	0.62691317239076	0.711736384579757	0.707318292451098	0.659554037517775	0.660205607045102	0.654698344489418	0.729495103546856	0.672491551968897	0.662845396514914	0.703874677244907	0.66191711185919	0.637773637098241	0.664644225243748	0.665530358812631
Butyric_acid,_2,4-diamino-,_DL-_(3TMS)_438050.91_PRED	0.761319520933674	0.711984130827842	0.700295227930477	0.652831165219576	0.752751126140007	0.71627074152297	0.651745000080167	0.598887692551524	0.652497431290063	0.722440393730163	0.73360663128421	0.640947379266796	0.70216124040044	0.677131825151302	0.656544387852531	0.659553349026677	0.667804487166229
Calystegine_B4_(1MEOX)_(4TMS)_622338.06_PRED	0.834466572671383	0.847284970558581	0.735634458767817	0.717062625487712	0.843929521848949	0.71252815846121	0.704056706799626	0.720981468694862	0.722784116476196	0.821791834393461	0.787856634490276	0.737531847535673	0.818661529746063	0.830363459623469	0.790938108894802	0.814434468118916	0.789633775532209
Glutaric_acid,_2-hydroxy-_(3TMS)_488906.25_TRUE	0.735463198565296	0.70561244722047	0.646802991847625	0.663208464349869	0.74055437162469	0.677005908196668	0.612136154181898	0.657376059940762	0.591420768531983	0.698092291335927	0.688500203822495	0.647435676764043	0.64625368875377	0.724503942227766	0.68412768475069	0.689473174573433	0.665891533620194
Maleamic_acid,_N-ethyl-_(2TMS)_459686.66_TRUE	0.816087424983578	0.858562651986084	0.75282999419076	0.756649318144131	0.886283604574628	0.783384801100925	0.721595581176932	0.7257790938215	0.750896354679238	0.859008852984175	0.947398945879053	0.740338474792556	0.854772697668248	0.853991115391217	0.842360722483525	0.847620298079392	0.795387162451223
Guanosine_(5TMS)_960132.88_TRUE	0.475754405710047	0.667661230677492	0.337933461238893	0.47097285622106	0.496118208139666	0.490007084541979	0.408081640579418	0.570534948987227	0.31342795801337	0.545556660119072	0.684097315079785	0.50394438546032	0.515476709835236	0.63555607986025	0.520259653375139	0.663546824240432	0.439069475443607
Indole-3-acetic_acid,_1H-_(1TMS)_668169.31_PRED	0.756482403309981	0.707503241944285	0.802646223248447	0.75170598208812	0.753612874346431	0.795504768186931	0.769234098667796	0.74536536668834	0.807156582421509	0.778670624535925	0.711198747508971	0.746273590283543	0.743114873163884	0.741033919746705	0.64770233536578	0.640014286083537	0.753800423784316
Alanine, beta- (3TMS) [MP-1.1] | Alanine,_beta-_(3TMS)_394745.44_TRUE	0.593970607049486	0.583970987466132	0.579966654894759	0.643136916025483	0.548080557206232	0.66670801323915	0.50157550855502	0.443190656655337	0.62700861857425	0.718772850586317	0.719486513882493	0.592635716219353	0.656819442493308	0.675865900890369	0.775837009691762	0.692040208106949	0.569427425663726
Proline,_4-hydroxy-,_trans-_(2TMS)_446416.97_PRED	0.722280106900131	0.775779612083881	0.72321332324051	0.76265389208864	0.745839967442479	0.674163071361298	0.713628067066024	0.705504500176209	0.62915339165423	0.699147200066215	0.784213066521784	0.668672184105461	0.68919649163884	0.850915045725394	0.81342551490187	0.835859970148496	0.729656645544861
Cinnamic_acid,_2-methoxy-,_cis-_(1TMS)_527345_PRED	0.70225237802995	0.694583753218994	0.629514969122783	0.620611062502514	0.737552058827778	0.650330992415126	0.692388601014985	0.635195131750665	0.574533511631825	0.700866949619396	0.727592875945454	0.597724617607804	0.680868605382171	0.722655210008758	0.722916138877446	0.707360221960001	0.698798461342814
Putrescine_(4TMS)_519185.38_PRED	0.5958385636246	0.520385975785148	0.657796647247191	0.546833164669802	0.488107035431797	0.452108650162855	0.52237162629463	0.462596358691345	0.657800844208646	0.517760471640897	0.492612974996388	0.589982906994578	0.618950443168902	0.544948513372555	0.510884868650465	0.608245485869301	0.59344968641342
Pantothenic_acid,_D-_(3TMS)_680979.56_PRED	0.798044291574886	0.798280103988086	0.724847720222401	0.718900939547104	0.822871303695681	0.741302686045702	0.713776052019967	0.733762075675614	0.657698203587773	0.76976104357251	0.77867361175206	0.745418251225504	0.780669481660412	0.785843933353199	0.750611615867672	0.789758407807314	0.796692954657351
Galactitol_(6TMS)_590143.5_TRUE | Galactitol_(6TMS)_590143.5_TRUE | Sorbose_(1MEOX)_(5TMS)_MP_587087.44_TRUE | Fructose_(1MEOX)_(5TMS)_BP_585803.75_TRUE	0.826696999176264	0.692828502679547	0.991839285929842	1.15837682772479	0.761007843981974	0.651973785154777	1.10775218674793	1.17919262127266	1.26278869827744	0.707944232046189	0.649922179187799	1.30722738662296	0.937273302763566	1.23577815428682	1.29592390324343	1.24337205894003	1.16462871118263
Glucose 6-P|Galactose 6-P (1MEOX;6TMS) [MP-1.1] | Glucose-6-phosphate_(1MEOX)_(6TMS)_MP_775879.88_PRED	0.630283739583847	0.682057347377812	0.532984914922047	0.673993542473544	0.780305742318016	0.580416049459712	0.650393278363972	0.681913894818129	0.602429133644321	0.699072054200117	0.7234877478953	0.673914329876679	0.704300364201895	0.806122536723874	0.750793416721666	0.777036558798119	0.795469079594777
Pipecolate [MP-1.1]	0.70088739715953	0.690698502958081	0.634884588773821	0.650555548264607	0.732053862515043	0.725330414448782	0.609157443206771	0.590090893498388	0.600522182882018	0.736527939033318	0.73360663128421	0.599659840208906	0.708499882511349	0.663200975985607	0.641304383550918	0.658610597933336	0.642816115611828
Butyrate, 2-Amino- [MP-1.1]	0.699888375544582	0.751086381005247	0.687502316890865	0.667595815083436	0.679649135168991	0.646566095630099	0.626703406137352	0.654888457690274	0.666238857749683	0.67515218784883	0.687774036707072	0.672634913522469	0.676422190232384	0.661179041120333	0.661055253370076	0.686706146044007	0.689641838145826
Calystegine_B4_(1MEOX)_(3TMS)_598843.25_PRED	0.721445324176293	0.810809417904195	0.786692195373863	0.854683098213317	0.640475848405444	0.682267379716157	0.823733945290904	0.890478865739906	0.933385293221799	0.70527738546157	0.725128306917705	0.946772590348415	0.744043861774746	0.932562101364462	1.03206476763269	1.00494502585759	0.882819397821729
Epicatechin_[-O]_(4TMS)_963441.19_TRUE	0.493976602965335	0.668718486881509	0.343017899896793	0.431605176357075	0.491438714751541	0.509849927346061	0.382216135534146	0.572945325131916	0.314584160098851	0.533896758398361	0.688580703417566	0.484495346215418	0.516117636677631	0.640961502467189	0.530722596259427	0.637776526980793	0.437625826648397
Azelaic_Acid_(2TMS)_605555.81_PRED | similar_to_Fructose_Derivate_604774.88_PRED | similar_to_Fructose_Derivate_608269.19_PRED	0.743365102743288	0.723593886204666	0.777556831757912	0.697187953056063	0.727746623358087	0.678567890642611	0.701939316741714	0.684231437906041	0.698405876572777	0.730128684390753	0.714352821425115	0.672770017430461	0.740641223294612	0.730482527012093	0.727433061524684	0.706937677006258	0.716637612893721
Caffeine_754467.62_TRUE	0.596493403874676	0.650797633169657	0.612921427492276	0.628296061131787	0.664421951507981	0.598428801297156	0.605331648114287	0.642131631911516	0.559639906242024	0.681063359560954	0.714491692012642	0.570589641447314	0.592883036120429	0.55288979792975	0.629733587400789	0.575561051960437	0.624918494652253
Ribonic_acid-1,4-lactone_(3TMS)_550463.56_TRUE	0.695389539860137	0.725825488782903	0.715637239249387	0.631664996094006	0.548821980533316	0.672052209923927	0.701860425258701	0.704474593632084	0.693750358190736	0.68508859105907	0.73122586376081	0.653172271947607	0.705992581664937	0.66006581273474	0.700768261984869	0.663638553962629	0.667804487166229
Rhamnose (1MEOX;4TMS) [MP-1.1]	0.703607448060776	0.715363477331429	0.508024108627517	0.677930282653724	0.737353351691794	0.478101601953216	0.686565316588844	0.606038483981898	0.647156986885881	0.52183161303512	0.688016427283163	0.620131941205027	0.505902421573331	0.664565731924581	0.371423890982845	0.680946138887867	0.699583834965219
Turanose_(1MEOX)_(8TMS)_BP_876686.69_PRED | Uridine_(3TMS)_876823.81_TRUE	0.686389657396244	0.619668549932551	0.566648856011839	0.629942423297748	0.7433134427449	0.675431570121305	0.54900817187853	0.524292125714934	0.571705982503044	0.727837276044464	0.708346605121551	0.571302477992223	0.667298334316374	0.724377095234771	0.646690435790305	0.629752368923865	0.664138443838074
Benzoic_acid,_3-hydroxy-_(2TMS)_507250.44_TRUE	0.739709025156394	0.689910907961768	0.713016191557765	0.719642731674106	0.748096698256179	0.770674628623705	0.714808629173847	0.699540952529967	0.696556726999526	0.770773064090413	0.703831847910528	0.686295131446102	0.722912024795576	0.692314479805671	0.704642413435094	0.718180205708549	0.685265747129888
Homoserine (3TMS) [MP-1.1] | Homoserine_(3TMS)_405393.81_PRED	0.65010157238048	0.668556250608612	0.62349604436831	0.661671919730913	0.646465450752109	0.605290896128469	0.595755545066212	0.593069652370689	0.527804328252486	0.637578788854117	0.669375973753469	0.593686002436534	0.571613122617039	0.700995395535097	0.68121669138886	0.724003866192222	0.657186385610612
Butyrate, 2-Hydroxy- [MP-1.1]	0.688397882797118	0.675164800215652	0.655546691689232	0.652669516907358	0.620858413775784	0.560834380528008	0.584910638763142	0.58342120393003	0.656668873139999	0.632971641508967	0.630629570986916	0.610568252281641	0.64308911401359	0.649699793738487	0.627598597260064	0.704522572135282	0.61357514580382
Glutaric_acid,_2-oxo-_(1MEOX)_(2TMS)_BP_486148.94_PRED	0.637505548965004	0.717335443719607	0.565145417614891	0.584970210282095	0.697065054107693	0.547824499389977	0.544054690808002	0.55992717174756	0.496226153912912	0.632428189649903	0.653793506971638	0.561056686505978	0.58958630066926	0.640334533255711	0.608189286628652	0.653716838306942	0.640164884409185
Nicotinamide (2TMS) [MP-2.1] | Nicotinamide_(2TMS)_455050_TRUE	0.383104747152144	0.717335443719607	0.449393721607502	0.49640797722184	0.481244575106097	0.379868601538383	0.501809575049098	0.480658871750399	0.347938547263889	0.503854695309728	0.633519290914136	0.378328904274378	0.355890335907909	0.456489633732319	0.622073614858263	0.643263081726676	0.531615983305853
Adipo-2,6-lactam_(2TMS)_492238.44_PRED	0.646052339062795	0.705939919114157	0.583341640229879	0.563528616202056	0.708301302577618	0.549259794901567	0.578546286889378	0.568706432713268	0.534973199318934	0.620851617606235	0.636253591533155	0.560805496772186	0.592064798373242	0.630526612936818	0.579462930837852	0.643366822643965	0.636105948800953
Asparagine_(3TMS)_476136.78_PRED	0.557498620768901	0.662948014480039	0.488785447060657	0.534483138867099	0.714083893261874	0.532871779361363	0.547189053590404	0.463677162059786	0.521184872416295	0.588509019718669	0.65738881268493	0.55072557175673	0.644754058373856	0.603618139694452	0.634652263136202	0.694034926820811	0.584613954022124
Shikimic_acid_(4TMS)_586124.94_TRUE	0.760732990621984	0.681380278179602	0.70727140907878	0.73495825795839	0.707416981123269	0.746678482987695	0.687164551207473	0.693066250366376	0.765569660977252	0.751792405204246	0.728428114367414	0.740245621310429	0.732457823292308	0.725010373585289	0.767112421257897	0.710977592602983	0.698700024814373
Glycerophosphoglycerol_(5TMS)_761775.38_PRED	0.608721942181727	0.529480569759281	0.490551020110661	0.596594322017706	0.537035595546894	0.684212678346974	0.495624981697604	NA	0.646071470006499	0.698318864428306	0.660156024646205	0.54312444385639	0.694230680092109	0.636415587827392	0.637058466458812	0.604874319146494	0.528867281046425
Uridine_5'-monophosphate_(5TMS)_995880.69_TRUE	0.623243785691105	0.796463980229025	0.598652121094482	0.512053566952182	0.696373373854875	0.54565195988523	0.574177766957078	0.828622508418662	0.557442467325262	0.581279393916769	0.606259980610293	0.488293771419736	0.634991012436555	0.540642837190579	0.649486308243305	0.565227876950929	0.589187273052177
Orotic_acid_(3TMS)_587220.69_TRUE	0.703177355702995	0.549926856636434	0.565982169059579	0.641429413208229	0.6083205414402	0.687512368996228	0.541055141389311	0.457096026812849	0.650484919961782	0.736832865006573	0.709992260580478	0.597314540969406	0.689428566135253	0.686054786726211	0.674666794615065	0.658231982162716	0.605523491839536
Threonine,_O-methyl-,_L-_(2TMS)_334293.72_PRED	0.640110932549408	0.632117811094141	0.591228067655755	0.620036420584722	0.621636908391603	0.645246090028462	0.567914940902213	0.546274119673504	0.467679274867024	0.686141566406472	0.671518332362962	0.603667311702734	0.60124587849003	0.631191241780749	0.630604850675175	0.618808737581066	0.606907526933121
Tyrosine_(2TMS)_669279.62_TRUE	0.621917480658797	0.516142384930351	0.586805416513681	0.553605914515687	0.690020430727956	0.654588412114126	0.634261185332067	0.539590229507592	0.617563305112723	0.688149361995904	0.588088716438724	0.584557193081138	0.676547277607498	0.658099715023115	0.285681882773251	0.179149270617362	0.677553209495213
Spermidine (4TMS) [MP-6.1]	0.656529389105084	0.702370101325792	0.7772905985431	0.819633625981203	0.24209452172895	0.746103068784535	0.672863166359833	0.596793048917227	0.8733141155463	0.737805170101257	0.724997626533586	0.648288556244665	0.639864799965659	0.813631512003909	0.496865874693091	0.582156697291897	0.516941004523131
Indole-3-butanoic_acid,_1H-_(1TMS)_755498.5_PRED	0.535583978415036	0.614870453553144	0.566648856011839	0.601729725260584	0.632365506689615	0.537981861907969	0.571634123411556	0.588445770764322	0.510285366776618	0.62868853774422	0.675725958873517	0.542151359939314	0.575271775011691	0.513536377122426	0.583622828529433	0.54084934266572	0.59090554726545
Oxalate (2TMS) [MP-1.1]	0.565771269191228	0.563673260974053	0.640214565227116	0.593423444944293	0.53655971040229	0.746103068784535	0.616703830138553	0.614845809456502	0.618690738549293	0.608603026865938	0.577181627366827	0.584336729928484	0.558153023630003	0.545870089349925	0.599748582364514	0.594744598076803	0.558229788582052
Glucose_(1MEOX)_(5TMS)_BP_599322.19_TRUE | Idose_(1MEOX)_(5TMS)_BP_601382.12_PRED	0.635659894706716	0.711477844506549	0.766088035137094	0.902517082734292	0.561650865657095	0.617076235341854	0.86602210102865	0.945806957620546	0.991101807242807	0.646855934787176	0.669016350891701	1.03325107094644	0.731191241618279	0.99657653142208	1.09350903794099	1.06628227700257	0.931367321803998
Gluconic_acid-1,4-lactone_(4TMS)_646839.44_PRED | Glucopyranose,_D-_(5TMS)_644536.81_PRED | Glucopyranoside,_1-O-methyl-,_beta-D-_(4TMS)_646436.88_PRED	0.463723498102015	0.866629549034131	0.470695805246108	0.545420975730873	0.454311469808504	0.547464052358081	0.576997974374983	0.749695567670823	0.476809162640833	0.547312154762947	0.735525136384927	0.557891367969768	0.478721379676472	0.64700505774123	0.672940296125579	0.605527998867837	0.54217227110917
Putrescine (|Agmatine) (4TMS) [MP-1.2]	0.498082612735295	0.562331618233728	0.544212538387539	0.521279345588765	0.43541937901262	0.385916842090891	0.511380935315496	0.454283603190345	0.474243111573073	0.436372894981683	0.436405924695878	0.537348746176879	0.501778113280068	0.485461074470603	0.456854537348711	0.467931280969193	0.520333624084243
Cystathionine_(3TMS)_766080.12_TRUE	0.373999073951979	0.491646238830557	0.439739073952106	0.336641585275414	0.419289238686922	0.257220718487428	0.410786102458903	0.336432239687887	0.223294760084848	0.347875909286598	NA	0.349505758260925	0.445899143406332	0.409872825030683	0.392761964816403	0.380818212052873	0.405420444151557
Diethylenglycol_(2TMS)_306329.94_PRED	0.585614361514345	0.620419802786997	0.577315878578343	0.567988565461237	0.576390735649014	0.560609364357388	0.542185707518589	0.53742860450361	0.551752799182675	0.605216176865673	0.588516877352715	0.547777528847878	0.610327448674915	0.636843696640536	0.622985544059564	0.570797933053573	0.595216651671229
Benzoate (1TMS) [MP-1.1] | Benzoic_acid,_(1TMS)_349981.84_PRED	0.554384675887739	0.537605418632164	0.616132293040281	0.570863706891914	0.541260603452118	0.597495715754458	0.597154436849028	0.640473670814892	0.624961536995603	0.564144051446148	0.557908685513944	0.796848900922998	0.578410046026065	0.534265544117216	0.556763280429357	0.556503042866729	0.570398716360075
Glutarate, 3-hydroxy-3-methyl- (3TMS)	0.779912201386839	0.735472014805094	0.717413305008495	0.716078779306035	0.716568196917221	0.695100819425525	0.645421770374037	0.551049734919138	0.672149567191128	0.776679669741424	0.733731042352984	0.729383172210099	0.783767797267214	0.793538845837688	0.735188895553189	0.76062358057745	0.732886145856008
Inositol-2-phosphate,_myo-_(7TMS)_863697.56_PRED	0.650672928592568	0.609366241452062	0.585758072023583	0.632565413847304	0.720064224710975	0.536335433071083	0.63081149152136	0.619797085991299	0.605522819684037	NA	0.747995561158951	0.586202126356939	0.661798778829825	0.635663759404363	0.698714411491051	0.664004963100069	0.642469707022151
Glutamine_[-H2O]_(3TMS)_MP_494765.41_PRED	0.521474293359427	0.269734487537517	0.468729138277788	0.225009343868773	0.697065054107693	0.171284453745838	0.491218283379089	0.324292174986947	0.39231425703935	0.120328328325432	0.238222084976222	0.42526818897986	0.647295650696577	NA	0.196525817160301	0.173861358913273	0.62630196251162
Octadecan-1-ol,_n-_(1TMS)_754094.19_PRED	0.529131953370521	0.561280902016356	0.574944994840793	0.546128374886362	0.570096134209605	0.516703750585285	0.529148831091271	0.556361457872665	0.478585898632499	0.590992848980368	0.638517850818224	0.498344599717978	0.524542693609032	0.475418811556474	0.553450815493883	0.529245081972162	0.562688198553587
Maltotriose_(1MEOX)_(11TMS)_MP_1072282.38_TRUE	0.604803614479949	0.432154378485172	0.526485702451665	0.49120851914343	0.533029261476946	0.516984267589741	0.437844534922336	0.374027599070599	0.523617516799299	0.60872724970398	0.533146492483088	0.505829818397534	0.643999276751999	0.597784995765438	0.555212631663444	0.572560435861513	0.46838731450823
Nicotinate, 6-Hydroxy-	0.725527830062309	0.799543995369179	0.747023003173328	0.555363187473581	0.834501841798522	0.311219688673058	0.769889624367417	0.737875299219246	0.398835044454501	0.299605353023624	0.661288404011243	0.589340380093655	0.538284780120662	0.54083235563392	0.530497048925369	0.610032563168402	0.79814965650565
Cellobiitol_(9TMS)_870156.12_PRED | Cellobiose,_D-_(1MEOX)_(8TMS)_BP_872226.81_PRED | Maltose_(1MEOX)_(8TMS)_MP_871061_TRUE	0.630647008369681	0.557167497112104	0.561760045403304	0.521921592558669	0.542339321699967	0.459727830553035	0.505055636251909	0.517156584922883	0.458669381831126	0.581423979520174	0.548670646089106	0.479039361006532	0.575271775011691	0.538735787535161	0.559442839517836	0.596958467700924	0.53106991395669
Butyro-1,4-lactam,_2-amino-_(2TMS)_452058.31_PRED	0.555337910326778	0.63529216787744	0.550672236994191	0.620036420584722	0.617808183227701	0.5354432205798	0.546088891315406	0.552726010079933	0.464991852908389	0.588925379581474	0.655259974915107	0.529746737337844	0.561127963326982	0.694602950228078	0.678720559339774	0.705307809427138	0.603952370058717
Fructose-1-phosphate_(1MEOX)_(6TMS)_MP_762927.75_TRUE	0.496599949288436	0.573768709953695	0.460646492514434	0.510868381002717	0.536400790379613	0.388606434125621	0.505055636251909	0.631080746615303	0.478585898632499	0.467226930818918	0.60496716552849	0.588910752703508	0.591036458102269	0.551295730985259	0.560766710998806	0.694947485359561	0.538161898604762
Histidine (3TMS) [MP-1.1] | Histidine_(3TMS)_678782.75_TRUE	0.619139780364472	0.60741509523237	0.594834525504443	0.508647624829471	0.654677233479582	0.533130423688489	0.592354186917513	0.53041276600528	0.563798698505516	0.591266725401213	0.544871040895355	0.579076658089081	0.633066408377531	0.59574916129122	0.656863072763588	0.873443018575252	0.628355537204572
Cinnamic_acid,_4-methoxy-,_cis-_(1TMS)_617496.56_TRUE	0.639852024836489	0.620954428400098	0.696788297511292	0.668118574078876	0.609157470496994	0.711581411942664	0.632429396359943	0.676505581580955	0.734286632588745	0.648157291257242	0.663252610404564	0.605049136909632	0.632905041522749	0.589489143867332	0.619838033333574	0.654300174992776	0.558229788582052
Ascorbate (4TMS) [MP-1.1]	0.695773946339599	0.704955644320535	0.601430032580416	0.570615404980887	0.606210313605473	0.800220939383498	0.656449862008344	0.523121727374195	0.696556726999526	0.61827937820694	0.707409562421425	0.50904072703826	0.698462094994653	0.577444499155926	0.709517438391106	0.671779211580447	0.720605529248441
Cysteinesulfinic_acid_(4TMS)_638681.5_TRUE	0.60165101789787	0.612083992451437	0.614212468523875	0.583698344024378	0.577897944438357	0.579394349157934	0.591781133465547	0.600184959893665	0.633490757422857	0.577774021232857	0.618448527728386	0.585107173992583	0.592883036120429	0.598860759473161	0.58427892680338	0.561350228828941	0.562800938982611
Norleucine_(2TMS)_337195.69_TRUE	0.572209576400352	0.566909830649543	0.566648856011839	0.53878699502109	0.563427656049647	0.631146433587007	0.540866036829496	0.552391962091168	0.420277647394137	0.591266725401213	0.586653902123433	0.551653562209857	0.566926770964622	0.573749262219117	0.563197904240893	0.580342450251906	0.53093311220805
Linolenate, alpha-	0.546293350246123	0.667661230677492	0.529966814888968	0.489696595973252	0.589738282935867	0.412018727100935	0.545720704647093	0.536702440862566	0.501474791975776	0.550085801570226	0.510413758998693	0.501864801562946	0.524542693609032	0.56577917172901	0.525223808323945	0.55330997854587	0.596322905443023
Pyridine,_2-hydroxy-_(1TMS)_208781.09_PRED	0.578313105297201	0.603563802897641	0.567147299319306	0.514568762908006	0.590437510507944	0.522921684383059	0.566274170033816	0.47158889460883	0.527606942431292	0.616860684073808	0.591204510725077	0.516102979077015	0.571844098721314	0.542903054032235	0.504154147285901	0.547661481207988	0.545962132126587
Spermidine_(4TMS)_728678.88_PRED	0.555609371145254	0.594105990359847	0.666726256368954	0.718213642785703	0.209534090985626	0.634513876347296	0.576530929880607	0.484069933613403	0.754209805994818	0.639053688700072	0.63505575791324	0.559417660265796	0.510591530249364	0.707504410549798	0.412144133947888	0.449159312935878	0.386753329111763
Fructose_(1MEOX)_(5TMS)_MP_580248.19_TRUE | Psicose_(1MEOX)_(5TMS)_MP_579668.94_TRUE	0.545579115620863	0.542203044487108	0.557264365166886	0.618398819941644	0.572950674534302	0.404762998395432	0.615067434716836	0.651191783855243	0.559471731856926	0.486838290840243	0.406854444904828	0.667633000341428	0.534305739546333	0.714713925451563	0.66725286754242	0.687580800381212	0.686171608399627
Tryptophan (3TMS) [MP-1.1] | Tryptophan_(2TMS)_789997.94_PRED | Tryptophan_(3TMS)_791196.94_TRUE	0.46702286416835	0.842405474790074	0.302707749536544	0.398560985912493	0.446466302419137	0.314347875375571	0.455811420103761	0.710712868561554	0.386377511743035	NA	0.763927316359911	0.408516640798705	0.498972188939152	0.490137436094656	0.914862403431463	0.978102610319886	0.525223718984554
Fructose-6-phosphate_(1MEOX)_(6TMS)_BP_(Derivate_not_found)_768948_TRUE	0.491124342460263	0.546518192851817	0.437077079406354	0.483134009492643	0.607479539719892	0.426224594595862	0.479452765607684	0.504186585315696	0.409845210162988	0.542890881379964	0.575193311744245	0.502734212823535	0.576399216749248	0.632841388446311	0.579125631891555	0.640120091828214	0.620775876236677
Erythritol|Threitol (4TMS) [MP-1.1]	0.596275378990303	0.632417885152204	0.6085959175596	0.570491132915599	0.607900552138775	0.573889996550301	0.551525111298534	0.591450794630315	0.547867190342826	0.607356058786355	0.597680793808844	0.565151557286864	0.599684205411759	0.633823743819629	0.609883758456257	0.629188203902902	0.624764053522745
Cysteine,_N-acetyl-_(3TMS)_554708_TRUE	0.584572060624479	0.585679979982991	0.611882068415658	0.538933688535893	0.515826122966225	0.573889996550301	0.598542778819676	0.624165939454093	0.633142581906093	0.560609465452311	0.582129734200984	0.572602067138838	0.594103089901201	0.558608485069799	0.542051207166764	0.541427900691257	0.546460897519668
Riboflavin (brk) [BD;1.1]	0.444084796376008	0.302055736678891	0.396379904031319	0.499857284748737	0.325060094267108	0.593432839510664	0.340126330269591	0.277898977074018	0.48868529982483	0.647357570946354	0.586509771718916	0.423392186563983	0.517074540037954	0.582839131769587	0.622725499177773	0.43362132903259	0.395417178100622
Pyridine,_2,3-dihydroxy-_(2TMS)_359008.03_TRUE	0.402870619707842	0.60579163704648	0.408502499185556	0.534783089154203	0.499694035957876	0.500936791041684	0.393508413315685	0.435827410738152	0.367423538604513	0.56382557919707	0.574422520686406	0.391660569848963	0.461122774556261	0.573749262219117	0.60790520026668	0.55491424429845	0.467583916634183
Alanine,_N-acetyl-,_DL-_(1TMS)_320211.75_PRED	0.617783879269565	0.561431394266236	0.657287691137905	0.627651958400213	0.541260603452118	0.660126906034427	0.615950377765697	0.621649132749378	0.625445102458248	0.603178654471702	0.561105200057376	0.636212841125318	0.569753982596454	0.561480135997218	0.550672832147371	0.577891959868854	0.577041385192722
Glucose,_3-O-methyl-_(1MEOX)_(4TMS)_613285.81_PRED	0.562270652107803	0.567927120790276	0.544212538387539	0.527606688452239	0.567857601037802	0.616226781292181	0.510043690165869	0.528521624001792	0.579918998921579	0.578215945582109	0.62814660217291	0.509208147955846	0.553076667752317	0.533673590897658	0.610164511028672	0.633758324386933	0.511947450271713
Glucose,_3-O-methyl-_(1MEOX)_(4TMS)_618213.81_PRED	0.542549118741557	0.532882703599348	0.470975058776934	0.482543988559618	0.559020710980862	0.508098947298292	0.471904692780888	0.453715976319627	0.455289138434552	0.550943870786955	0.540800011679711	0.496378774920565	0.559894695853163	0.537966858062813	0.540570108325873	0.556503042866729	0.482765480984915
Gluconic_acid-6-phosphate_[-H2O]_(5TMS)_762561.19_TRUE	0.432122179908391	0.534295470700068	0.354364854160042	0.449277478065495	0.552626929581014	0.362373293374421	0.443388949791825	0.432033449345904	0.443587751875619	0.45393411981609	0.49771531220685	0.503599450226186	0.545437156571513	0.621638012827917	0.520259653375139	0.602764947092815	0.565926627544903
Eicosane,_n-_695693.12_PRED	0.569081288611464	0.556549728490861	0.648627835359897	0.642626265493521	0.57939212244112	0.590063502763386	0.55080949028936	0.561525613717253	0.640105036541355	0.61886721529871	0.619884322788994	0.558274154530982	0.549431262248371	0.593550033163838	0.686010888677887	0.557902562460247	0.572111386185021
Propylamine-2,3-diol_(3TMS)_315724.22_PRED	0.531770415407651	0.518084159084541	0.529966814888968	0.467807654733435	0.488317157661308	0.472922815886662	0.43817534053299	0.455976158030257	0.511359741072771	0.517760471640897	0.483504461980931	0.49958450655792	0.516756167526238	0.554991936861676	0.546827456514988	0.503010977776383	0.557649336303687
Chalcone_methoxyamine_(1MeOX)_706113.94_PRED	0.588706786090285	0.585941414971205	0.586805416513681	0.546692414539205	0.572564184222316	0.529610041631791	0.565282641930638	0.513483405262382	0.516646235208059	0.605595657021278	0.603533953182334	0.54159294398578	0.586012366403929	0.584453489825206	0.58927836881488	0.594186452101503	0.568123363001915
Sucrose (8TMS) [MP-1.1]	0.588820342090014	0.536566974063664	NA	0.590870650215661	0.47568700580786	0.514161145337513	0.561092809905375	0.528141075955438	0.603240833540708	0.569319060441318	0.526570272237588	0.538916581016954	0.549431262248371	0.588065737846716	0.649707974549954	0.690722791493415	0.821608324341775
Glucose,_2-amino-2-deoxy-_(4TMS)_BP_659366.94_PRED	0.458320101726683	0.588534335461807	0.35541008535299	0.425597065827665	0.488107035431797	0.511008747398321	0.41116923115659	0.558961467468182	0.383545188404962	0.548877588477928	0.646680487167017	0.39797395108113	0.473054283463568	0.543835900034776	0.637416433542503	0.553846470962217	0.504079515261425
Dotriacontane,_n-_1074008.75_PRED	0.553837776507956	0.560979525552874	0.661619625204792	0.623364392390237	0.545535657422237	0.670761918327211	0.616829106273223	0.647219460582461	0.575311853911233	0.603306677795322	0.603795411582544	0.583894992930823	0.554104080191884	0.570606500640613	0.597343243058445	0.543341887847744	0.573700940312933
Allantoate	0.45923160185259	0.882335896006812	0.53654282128665	0.667371336937022	0.337055818271723	0.667367479653352	0.47409304868668	0.648420095471105	0.589838461317174	0.672296675393202	0.86459365232368	0.473413039092481	0.434424592136312	0.650292792813964	0.959576802667295	0.961017874665825	0.511485864347125
Calystegine_A3_(1MEOX)_(3TMS)_MP_554707.88_PRED	0.573076181578424	0.576824022091917	0.602940289367647	0.576728155787391	0.560271564541211	0.574415827190946	0.596036175109568	0.629320755663473	0.619065133762216	0.559796374264164	0.548132868810837	0.564167371333615	0.581491695649095	0.597514973882979	0.335795752296666	0.480100749599522	0.566147629178295
Melezitose_(11TMS)_1053876.5_TRUE	0.517357909464128	0.622759937236083	0.531179969590435	0.573573940895806	0.400452937049262	0.556054777003906	0.536655820065036	0.598104964423661	0.532483748821879	0.617097911232437	0.659111535498721	0.445426452065126	0.497551749958255	0.63555607986025	0.61225528562814	0.630986775007878	0.494624307630619
Dodecanoic_acid_(1TMS)_528526.38_PRED	0.497342753372686	0.519622089846826	0.586506779759497	0.47816058207093	0.579639900996083	0.460660042007717	0.465749025071699	0.576796729061987	0.425625632157389	0.478839784095446	0.569725109122401	0.496019037066956	0.53052603052705	0.546420615476472	0.555601641989868	0.509446207470677	0.556482235452119
Proline,_4-hydroxy-,_trans-_(3TMS)_450628.06_PRED	0.506386639027245	0.5314583444339	0.49080187496814	0.556034781464312	0.518491864955044	0.448186813282503	0.441451107974289	0.443190656655337	0.354647922837816	0.537437834564203	0.563094384717723	0.44254273286759	0.468042477372878	0.628965498760855	0.583622828529433	0.610666137350113	0.538292807018557
beta-Galactopyranosyl-1,3-arabinose,_D-_(1MEOX)_(7TMS)_879025.31_PRED | Maltose_(1MEOX)_(8TMS)_BP_880335.56_TRUE	0.507443033997614	0.467305852764725	0.465020347032199	0.462412934615304	0.523188972219641	0.482650020898282	0.384884200681075	0.458209189754152	0.366537718883629	0.534648061259199	0.487864816704249	0.433858325933894	0.521470545988165	0.556896035886968	0.492675442467826	0.501546146427599	0.453726347490293
Pyridine,_3-hydroxy-_(1TMS)_283546.44_PRED	0.53361065329016	0.574885964329174	0.56631581284531	0.537461660502684	0.548673950106721	0.613828839252314	0.503902888134745	0.508470130959725	0.545534948383502	0.605848199903094	0.605226493526138	0.522588428966466	0.576623814813276	0.560303636490484	0.60790520026668	0.562540071121971	0.549910441412723
Butyro-1,4-lactam_(1TMS)_241244.02_PRED	0.50919051193131	0.716598578944157	0.478359847856028	0.413265800719528	0.502424969953523	0.291776912600622	0.507793133129702	0.590908027366707	0.447171023568057	0.455686764585899	0.529390412785995	0.457860941035846	0.59591698450274	0.363512380135787	0.335795752296666	0.471794941700631	0.543445308432729
Glycine,_N-cinnamoyl-,_trans-_(2TMS)_737734.19_PRED	0.517690582065223	0.537777890379451	0.534178502475346	0.45798473424676	0.537352125878019	0.404022662333917	0.513807604366063	0.478183500212335	0.411975939816322	0.522032772110019	0.542476892302896	0.516424815956861	0.508931587126014	0.518585583317112	0.517843033227196	0.534748866147237	0.501643641418212
Pentadecanoate ((1TMS)) [MP-1.1]	0.485877780869246	0.534822308128309	0.533184381711231	0.522880933286921	0.485351941327098	0.469749602459357	0.464033857949481	0.523121727374195	0.354647922837816	0.546260914535726	0.578846585902886	0.528548205208074	0.523320457244748	0.50414066609838	0.637535586069923	0.528205378575881	0.497669432524405
Orotic_acid,_4,5-dihydro-_(3TMS)_616339.19_TRUE	0.475129181407386	0.572503143235052	0.371854764704919	0.500396264777918	0.479264375705897	0.494764923422643	0.358336429495969	0.426851297600458	0.397319866088423	0.5246275792046	0.582129734200984	0.453126709233415	0.444931396890755	0.478742060027657	0.592270369916045	0.612302120043068	0.484045326822057
Glucose, 1,6-Anhydro- (3TMS) [MP-1.1] | Glucose,_1,6-anhydro-,_beta-_(3TMS)_558133.69_TRUE	0.494729900778364	0.496305238966553	0.526485702451665	0.456636011279601	0.514387400713893	0.507658784682366	0.506201211030056	0.531911948773388	0.472426969283744	0.533708441506492	0.492119190842729	0.493480564048797	0.489520891223239	0.423369056950706	0.479741595883148	0.488007941787618	0.476212095458378
Maleimide,_N-ethyl-_235945.08_PRED	0.498451445424112	0.682731786039374	0.472087876742952	0.406641820477969	0.470411232132809	0.402284426117222	0.503902888134745	0.594408014204247	0.401086383953929	0.486103354050975	0.523290619085846	0.423661385426312	0.569753982596454	0.364056362990523	0.300577817765653	0.431008483601728	0.50695562236824
Melibiose (1MEOX;8TMS) [MP-1.1]	0.607493440018104	0.476868453335365	0.53790818120365	0.403688619590545	0.632091542807964	0.359301831465449	0.495140525436992	0.466882373456437	0.468478470310456	0.415098470524725	0.362690222925653	0.547642374282248	0.621558231274722	0.503195206900512	0.273570423284695	0.276012070308967	0.606907526933121
Spermidine_[+CO2]_(5TMS)_822511_TRUE	0.46261061895586	0.513783216579346	0.440727529174594	0.549210188369256	0.373287258021935	0.3804260998909	0.330890875425183	0.299957136300852	0.450981398915294	0.451867554990282	0.478499032966115	0.505146486375831	0.473465371034041	0.50833052886652	0.46032192560494	0.55473676184546	0.453726347490293
Xylitol_(5TMS)_501235.88_TRUE	0.3729192486842	0.469107425043603	0.359022579497646	0.313289670737442	0.398698348248067	0.472397447921997	0.350523661352222	0.408936189430222	0.308734732563993	0.452460427927826	0.441761489382563	0.409392247078794	0.364651579541846	0.429730834493564	0.388601033503543	0.417284182055789	0.431971102595745
Cholesterol_(1TMS)_1079629_TRUE	0.443343712888142	0.484999630010857	0.41237304682278	0.341235798370039	0.611952553184444	0.350440670247994	0.386641667706799	0.385861444483543	0.244064875512699	0.526990021548349	0.788767150802749	0.382432958756435	0.465480327285597	0.428625549068464	0.60960253442674	0.529659133550973	0.486216388542337
Fructose-6-phosphate_(1MEOX)_(6TMS)_MP_767170.94_TRUE | Fructose 6-P (1MEOX;6TMS) [MP-1.1] | Fructose 6-P (1MEOX;6TMS) [MP-1.2]	0.424886542114701	0.477601428946649	0.387395216010978	0.400991140053708	0.506252934028525	0.279221511993786	0.404147873964557	0.496218323146109	0.368744913555919	0.497976840879983	0.497954610079246	0.506340622532059	0.501778113280068	0.567403759089369	0.533405733016332	0.53753191683165	0.539596179144823
Cinnamic_acid,_2-hydroxy-,_trans-_(2TMS)_633587.31_TRUE	0.407126194831396	0.326404804424887	0.400509660976419	0.305986808822838	0.359692004918389	0.337055675943303	0.359353521988055	0.346820285904294	0.316305956123174	0.425706853031723	0.387290092378963	0.400744385552778	0.39514511785134	0.36186977096551	0.34897815944911	0.37298191283751	0.362661935914585
Sorbose_(1MEOX)_(5TMS)_BP_583432.25_TRUE | Tagatose_(1MEOX)_(5TMS)_MP_583026.38_TRUE	0.526772512592524	0.496960719163984	0.501752137514441	0.579000669323865	0.522673331322509	0.37189507474553	0.566767938607324	0.594940672608009	0.513491231987428	0.443666485155583	0.371280079661227	0.624067610552984	0.491748837633562	0.637270716117101	0.606046798513289	0.626912029018756	0.638964796162436
Ribose-5-phosphate_(1_MEOX)_(5TMS)_MP_705185.88_TRUE | Ribose-5-phosphate_(1_MEOX)_(5TMS)_BP_707635.88_TRUE	0.467892932316696	0.439595208928586	0.47969563293018	0.501291199873734	0.544324965868801	0.587424758927161	0.468572596877041	0.459866534958107	0.444189465492091	0.584291558516622	0.612086953395602	0.456968718397724	0.473054283463568	0.644266344061538	0.582964149724661	0.529037665403971	0.597421751209899
Erythritol_(4TMS)_410125.56_TRUE | Threitol_(4TMS)_410391.25_TRUE	0.542694525277778	0.566472017556529	0.530978328775874	0.490642949040358	0.547634171648169	0.480135964964183	0.490473468042972	0.525068317471926	0.487480776466234	0.556340692152401	0.53586345293632	0.482565685331945	0.545706355686468	0.55533974748098	0.547644379453069	0.550964781065969	0.558808194848847
Propanoic_acid,_2-amino-2-methyl-3-hydroxy-_(2TMS)_295176.81_TRUE	0.505856190693459	0.487089735787876	0.465020347032199	0.426919343033247	0.506442124537274	0.469749602459357	0.477861171202961	0.489775680396367	0.469803366606867	0.483133216070737	0.508172417667678	0.473617033007663	0.480306605004508	0.473166179563241	0.491255002482968	0.505663144543258	0.504401583447229
Glucose,_2-amino-2-deoxy-_(1MEOX)_(5TMS)_MP_608643.12_TRUE	0.458776408261572	0.48453172460799	0.52398840339848	0.374136081747192	0.392230110533799	0.286045955936171	0.425521426477666	0.454283603190345	0.429544304734621	0.397511039143068	0.41200907049755	0.444949025018202	0.495759427079363	0.429363214272641	0.452236863443779	0.424093100769379	0.435436256442167
Adenosine,_5-methylthio-_(3TMS)_995365.31_TRUE	0.431067774393004	0.460983109579437	0.361560416673648	0.385269422595007	0.407968273805663	0.378467985049322	0.326093385099017	0.430751391466298	0.309918463431229	0.360642735749892	0.459312127959837	0.388091569959573	0.432869435993435	0.47288246256626	0.356799138739722	0.471500931914039	0.386092991448055
Nonanoate ((1TMS)) [MP-1.1]	0.671765157929798	1.153630720877	0.926033811322699	0.695902591372764	0.620272232843623	0.569955061580316	NA	0.928334571591999	0.717534703883394	0.494730470823241	0.50220695764345	0.706258726481006	0.701298032988609	0.5203068144442	0.498239704138585	0.518319165142914	0.924909506109245
Butanoic_acid,_2-oxo-_(1MEOX)_(1TMS)_MP_252911.77_PRED	0.486271513673085	0.352330071136472	0.541373524685927	0.542852431235621	0.434848054484112	0.513163515270169	0.534318096298681	0.582285947542453	0.548756973476103	0.520619913010035	0.475534358513288	0.500640536560629	0.473875471598593	0.422604506362981	0.50309421418931	0.419316173789971	0.358017464899982
Glycerol-2-phosphate_(4TMS)_556161.06_TRUE	0.380002804057455	0.434357761820949	0.393008413386863	0.443324713319581	0.400452937049262	0.449764833693584	0.393086664510853	0.40155833006631	0.360681665898636	0.511262339778963	0.579897918591117	0.361289601742247	0.412425511450979	0.468276518191255	0.481867249247022	0.436557574938098	0.395104320640761
Glucaric_acid-1,4-lactone_(4TMS)_660551.44_TRUE	0.433692702049915	NA	0.477553722706761	0.553741664641217	0.453285796100837	0.397232713760799	0.528340516849544	0.610738741630669	0.600795726526971	0.430451223604552	0.433665416800646	0.664973267806274	0.473054283463568	0.64700505774123	0.671876384044648	0.679036202588633	0.632976100720417
Cytosine_(2TMS)_515287.31_TRUE	0.458091529401972	0.488926713769737	0.476473395963676	0.428755291346628	0.492056317001941	0.580924939488208	0.427983073298631	0.44198352477912	0.431154566152249	0.534835397844321	0.561936775808463	0.436883212683742	0.510591530249364	0.462335417639836	0.544144595302499	0.50897804681015	0.459959863135051
Heptadecanoate (1TMS) [MP-1.1]	0.439087729989943	0.446146658112035	0.555505745184654	0.509675797500556	0.461570958239152	0.5354432205798	0.426932109800387	0.446174631730781	0.442075454104567	0.485118745445035	0.452625516286447	0.467394483834745	0.447818341160263	0.442115060046386	0.565594307611109	0.444025176766737	0.467785135160917
Ribulose-5-phosphate_(1MEOX)_(5TMS)_BP_708146.5_TRUE	0.461041354504551	0.434044699879718	0.460646492514434	0.499136271464287	0.513482079039281	0.568878074202779	0.437844534922336	0.441377006604144	0.411975939816322	0.582001162930095	0.575500680333136	0.44254273286759	0.438503754431898	0.611134610614335	0.566142487708505	0.495043628375578	0.588514165858184
Arabinonic_acid_(5TMS)_546660.38_TRUE	0.546435869748886	0.545366933686162	0.531179969590435	0.524785284203956	0.526756013595554	0.478101601953216	0.562275606915524	0.571140479345838	0.572652966190253	0.512326427881541	0.46632661034566	0.52428944086646	0.551003115087314	0.535443223081752	0.203030280165444	0.421323414704548	0.517536086546077
Galactonic_acid_(6TMS)_626905.06_TRUE | Galacturonic_acid_(1MEOX)_(5TMS)_MP_624653.5_TRUE | Gluconic_acid_(6TMS)_627052.12_TRUE	0.550103683395337	0.57292602480682	0.467311465217772	0.435171888074264	0.565186365286964	0.440721172770695	0.425167060106855	0.425532868983853	0.41789190603122	0.539821137933279	0.508622987714124	0.46420074512806	0.541071249797224	0.557754444734266	0.55598975078518	0.559635411672952	0.523514394278414
Uridine_(4TMS)_863220.75_TRUE	0.470050520275281	0.595965266963048	0.448765519207483	0.440890689401585	0.45885313148347	0.345526179032038	0.439492650431455	0.44911146462302	0.406242463105474	0.458284132802842	0.516755920056528	0.450364530956589	0.465480327285597	0.488075123643567	0.40273329474937	0.664826417016504	0.472737040433414
Sarcosine_(2TMS)_233204.59_TRUE	0.532078384586113	0.534646873247926	0.626047883847368	0.515067853205659	0.493895990921982	0.464892856172829	0.510267240008509	0.55928392662228	0.561979535563217	0.480620091786474	0.48141433128065	0.544505512720249	0.577965236391656	0.509476052520794	0.51440008643975	0.500562308032702	0.527475468733053
1-Pyrroline-2-carboxylate	0.421021300530695	0.401767167707986	0.472365038486245	0.421031618839348	0.411606840039809	0.435513476881635	0.479452765607684	0.57384121918263	0.47553027592771	0.437018988220758	0.416255166294172	0.451059054377993	0.445899143406332	0.474014463915725	0.439909175558207	0.422119515004857	0.405420444151557
Galacturonic_acid_(1MEOX)_(5TMS)_BP_632938.19_TRUE | Glucuronic_acid_(1MEOX)_(5TMS)_BP_633533.94_PRED	0.444822948741565	0.448469004445272	0.393857063632064	0.338743567901055	0.422084321374372	0.321959769877725	0.400128210496812	0.397756609521538	0.381084956633333	0.397912236129247	0.369296530205671	0.340773252803001	0.458453863958079	0.439710249303088	0.41798927843587	0.392153699404744	0.465354073096547
Glyceric_acid-3-phosphate_(4TMS)_606948.88_PRED	0.65911769124753	0.673752831116899	0.66769234435564	0.650637288712333	0.698003815310394	0.680549505337089	0.713628067066024	0.643570316361484	0.660552303606008	0.667255108881628	0.727206032989346	0.689830963478792	0.627158956084777	0.497162258062341	0.704322968664467	0.70416440541817	0.706206057836566
Calystegine_B2_(1MEOX)_(4TMS)_BP_612263_PRED | Calystegine_B3_(1MEOX)_(4TMS)_MP_614672.38_PRED	0.338964890900558	0.404016781903838	0.361560416673648	0.344102900517947	0.444312685610798	0.436985419641469	0.309577402027301	0.296015695602395	0.359765230182228	0.442105878896311	0.431930552586267	0.360908970967568	0.451125906812311	0.412334755203995	0.448596092443106	0.463357654155482	0.375149357849452
Adipic_acid,_2-amino-_(3TMS)_553368.06_TRUE | Adipat, 2-Amino-	0.375429190373668	0.470382910571449	0.496722553963373	0.376552515139154	0.401843894356224	0.499411674140455	0.319915178691203	0.459866534958107	0.355118612284832	0.473653927367114	0.49771531220685	0.377982643639875	0.492117352993517	0.461425829701741	0.564308199160106	0.466420798884655	0.419771964111959
Butanoic_acid,_2,4-dihydroxy-_(3TMS)_409079.97_PRED	0.352733738892523	0.401010770871306	0.359022579497646	0.372391153696016	0.404251452866768	0.367488397718678	0.321790508383194	0.391507360380563	0.256796659187853	0.382873967220543	0.438097207093427	0.330245962632993	0.341399278048716	0.464438811238402	0.420619733618346	0.45150157996487	0.413454606853136
Salicylaldehyde-beta-D-glucopyranoside_(1MEOX)_(4TMS)_MP_879215_TRUE | Trehalose,_alpha,alpha'-,_D-_(8TMS)_874876.56_PRED	0.410107556631148	0.370419096582183	0.316071349807314	NA	0.463521055233893	0.374206006736922	0.365831084792359	0.386678578351862	0.315733678897957	0.433107165163888	0.422621190260693	0.339919087200299	0.401519245648811	0.439016783176889	0.387013638962337	0.42911647152504	0.398513377276908
Quinic_acid,_5-caffeoyl-,_trans-_(6TMS)_1052532.75_TRUE	0.407126194831396	0.523033411837224	0.453118788976516	0.459546305175287	0.301364124096075	0.445796072443219	0.454908262415954	0.510575449675945	0.45010853929077	0.513384260286	0.558924431302556	0.313699616119025	0.410061365708009	0.546969341514378	0.50309421418931	0.522474735559775	0.382750845613187
Saccharopine_(5TMS)_855563.75_TRUE	0.207425602540713	0.375760834951211	0.246457786875197	0.330629952067999	0.155547775956249	0.343190548754304	0.266325465126514	0.291988874131264	0.320266438055869	0.41363556186707	0.519526036006933	0.190744397964788	0.217582130410059	0.391085482222084	0.461348295744376	0.441573384268507	0.18200453614265
Tetracosanoate (1TMS) [MP-1.1] | Tetracosanoate|Tetracosenoate, cis-15- (1TMS) [MP-1.1] | Tetracosenoate, cis-15- (1TMS) [MP-1.1]	0.437306659950796	0.466267925610653	0.49329189141269	0.469291276226046	0.419289238686922	0.479290839355829	0.474907021742135	0.477684445803285	0.472166161117147	0.476783341440695	0.510858603879516	0.485261462586111	0.419327735508535	0.445491805031807	0.490109911729472	0.461179063234817	0.442858242608843
Butanoic_acid,_4-amino-3-hydroxy-_(4TMS)_531278.19_TRUE	0.394700356712709	0.385146515245338	0.322407771514682	0.371688695942857	0.485778671204353	0.417869435921665	0.397673597161178	0.310076513588374	0.288769018390931	0.476006075550629	0.442747668703085	0.347874719031307	0.44638096827614	0.464737155430299	0.496313171649421	0.478979708258126	0.415679640103069
Octacosanoate (1TMS) [MP-1.1]	0.394700356712709	0.360656286443086	0.354364854160042	0.352065231510796	0.459101980356535	0.28289031231598	0.295063477040386	0.29733881617533	0.387179392662291	0.429445050766057	0.319436827278824	0.414275233053662	0.441500441875669	0.417548176426553	0.478206581742795	0.356094202707052	0.360356131867323
Tryptophan_(1TMS)_766366_PRED	0.313486458196576	0.337681027480005	0.311503082420772	0.367778324613557	0.294412252195027	0.337055675943303	0.307572736779513	0.351804435811429	0.307543913445738	0.445521519871465	0.439772304722215	0.308169155268128	0.349223858448941	0.396990398082867	0.484857844257884	0.387320730104895	0.310548731317494
Glutarate, 2-Oxo (1MEOX;2TMS) [MP-1.1] | Glutaric_acid,_2-oxo-_(1MEOX)_(2TMS)_MP_524574.81_TRUE	0.508667984441679	0.502328889630415	0.555505745184654	0.433905691964959	0.465209524473298	0.486444264261377	0.567914940902213	0.590636048304694	0.492726951635602	0.445521519871465	0.505902004951804	0.431555870995555	0.411837535644608	0.380593405708776	0.388601033503543	0.322695537906342	0.426114538681835
Glucoheptose_(1MEOX)_(6TMS)_BP_679981.19_PRED	0.450387163118919	0.416241614619169	0.360549455529323	0.382629404171121	0.473183893405223	0.353650849224524	0.348920516770076	0.40155833006631	0.304535290274731	0.395897245601481	0.420027863326149	0.428177297851993	0.436476350177329	0.446491719988468	0.397322669756291	0.459288498235448	0.446790203380902
Threose|Erythrose (brk) [BD-1.1]	0.288565590560642	0.358248580725599	0.481813028621346	0.371688695942857	0.301982462904099	0.410827659622155	0.398904994881526	0.375764972984884	0.40368113351348	0.351023571600523	NA	0.395789335183848	0.247803099037937	0.332478978885722	0.419309670586446	0.326994714988084	0.418690617938571
Arginine_[-NH3]_(3TMS)_606298.12_TRUE | Citrulline [MP-1.1]	0.344510854729357	0.345160027804037	0.306140230724557	0.327994485544476	0.329853713159713	0.387266181372614	0.267164160302841	0.328799005551569	0.28811160887149	0.420480829155033	0.451693590218025	0.391016895576137	0.357517079661789	0.360210924868159	0.484561176562546	0.440155806136358	0.352833028958807
Cystathionine_(4TMS)_754589.12_TRUE	0.292494773156526	0.665692293130657	0.31281985259907	0.245140397813087	0.324519168903821	0.254619024162783	0.290697424036144	0.445581656249607	0.20415825715056	0.384176289724071	0.631746654333854	0.272115978458968	0.289872277670061	0.28593965470893	0.813175312359977	0.856874337070909	0.298024728957882
Levulinic_acid,_5-amino-_(1MEOX)_(3TMS)_BP_591715.44_TRUE	0.455326600611746	0.34672159275119	0.614083769089783	0.733798347536355	0.405612290704766	0.33980565795521	0.698997578009896	0.757843330183053	0.821852644837982	0.37711904113483	0.319436827278824	0.900615928967209	0.563568102013405	0.863005972237287	0.927388458671251	0.871116133390359	0.799353773765129
Spermine_[+CO2]_(6TMS)_960617.88_TRUE	0.22417488760787	0.407337468057845	0.285282603403801	0.270654013149916	0.275341292663226	0.3044044099252	0.295781190513944	0.337497558682014	0.19279138067643	0.289645835487229	0.408057517450834	0.255809329552909	0.303729072627835	0.350487880258617	0.340071785536546	0.432879019481611	0.18200453614265
Isobutanoic_acid,_2-amino-_(2TMS)_228564.16_TRUE	0.32503422022969	0.594105990359847	0.450332043630996	0.271844473659241	0.463763277435399	0.361456821539924	0.560243277835761	0.624165939454093	0.181861916284282	0.310351039447056	0.396920070577539	0.340773252803001	0.265337126916137	0.205325252658225	0.326901509853572	0.282623542045401	0.414848784211613
Thymidine_(2TMS)_849645.31_PRED	0.370375090573413	0.511992558645134	0.373752272918858	0.492521708461372	0.385510345675185	0.485625559767913	0.393086664510853	0.359511141698325	0.376071257508449	0.581423979520174	0.558755549122166	0.379019436172072	0.400263307614578	0.507177132135668	0.278723718196519	0.382341727757833	0.407756336805731
Ergosterol_(1TMS)_1051145.12_PRED	0.399457520297958	0.492095379571056	0.415035041368532	0.452301141673819	0.273895045625327	0.432750647505273	0.387948844366719	0.471071793703151	0.410201920928631	0.502066489052012	0.511965795214054	0.304559305740117	0.411247528829692	0.494687013134264	0.521216620951844	0.508273302578523	0.359968661349652
Alanine,_beta-_(2TMS)_273369.53_TRUE	0.346600790116912	0.499127948303799	0.471532304466442	0.272436933959197	0.481463203234537	0.220416220590057	0.449704947398484	0.46846449071431	0.34499232747296	0.272788371734515	0.361129620912222	0.306115245805226	0.304834622138448	0.297633238912125	0.312606392387274	0.345063081912744	0.472346340991724
Phosphoenolpyruvic_acid_(3TMS)_528164.19_TRUE	0.596928691021969	0.558243330210709	0.585758072023583	0.564557250146195	0.555782337791552	0.600926497617044	0.666854489456008	0.572045092594307	0.619065133762216	0.498435863510948	0.561271831546777	0.595768389609656	0.534017943685351	0.37097221108627	0.61156125699197	0.464589752916887	0.635745065242278
Fructose-1,6-diphosphate_(1MEOX)_(7TMS)_BP_915966.25_PRED | Fructose-1,6-diphosphate_(1MEOX)_(7TMS)_MP_913507.62_PRED	0.571338928397755	0.483827493218777	0.57286536154841	0.534483138867099	0.547186630148657	0.278293646529031	0.544611705674082	0.593873825170786	0.510285366776618	0.429108405628092	0.447596908619079	0.575521285556306	0.602021393116616	0.456176246967591	0.476033646547015	0.563889453823649	0.599236965383798
Xylulose-5-phosphate_(1MEOX)_(5TMS)_MP_733445.94_PRED	0.3677957702319	0.3649077511656	0.351725644937189	0.282237456193265	0.340052867582129	0.300283625419596	0.36435636444051	0.316132347304689	0.35036082079875	0.342504263410365	0.383652634400645	NA	0.392527337829808	0.348712005869394	0.384334079873859	0.364190898423684	0.380712388492495
Tetradecanoic_acid_(1TMS)_616607.75_PRED	0.355528240212845	0.397951787763719	0.497932534921579	0.43892089573231	0.369987386651941	0.401033467996911	0.392240257167926	0.389911662550983	0.342503356328075	0.430451223604552	0.443402048404967	0.457192188488129	0.378084360703679	0.392007564562429	0.515143842822364	0.416464317470797	0.387082504122831
Pinitol,_D-_(5TMS)_617547.62_PRED	0.216823112047097	0.258045942734916	0.314777600275975	0.182752414440223	0.345416007766321	0.337055675943303	0.222919928356327	0.221963803099456	0.341498979453103	0.298911954193456	0.320098629074303	0.199351112491291	0.362306369201931	0.299239170437464	0.357434694987244	0.367542724651962	0.311593917577119
Calystegine_A3_(1MEOX)_(3TMS)_BP_588253.69_PRED	0.416789162723233	0.307336533218483	0.596540967386304	0.723699775026886	0.356119257274706	0.249311328772084	0.691054585954408	0.762328280801795	0.818359296818125	0.312296320812204	0.238222084976222	0.885793726291438	0.53800361659531	0.859043229716442	0.913881783564193	0.866468578173794	0.797152942211565
Glutamic_acid_(2TMS)_477506.88_PRED | Propane,_1,3-diamino-_(4TMS)_478361.56_TRUE	0.30380910266415	0.360177409451499	0.340775382390888	0.318007646090725	0.375318133476892	0.302354682419056	0.304182341271317	0.286480392421302	0.298377950170964	0.32891767801778	0.381340231335858	0.290480247371624	0.343169312573289	0.382550495687716	0.395816192998967	0.378247294984974	0.36112833888293
Benzylalcohol_(1TMS)_279072.84_PRED	0.409811554539283	0.247359935766209	0.454953568600342	0.460211662645025	0.319014706422363	0.593241834907027	0.416078676041573	0.441377006604144	0.449524497171934	0.457422502551042	0.431231763768456	0.375890992254421	0.410655476926407	0.415562134741555	0.41974749794752	0.333919786079449	0.318230025417863
Leucine,_cyclo-_(2TMS)_377176.62_TRUE	0.374357631756406	0.416241614619169	0.335047202558815	0.474086476892733	0.409962436459104	0.446795706798373	0.324261596126893	0.323148185803019	0.296492948393922	0.422239755905604	0.441100936272683	0.31120678792948	0.35992850987493	0.405263286302264	0.39224746711458	0.381327617224109	0.358017464899982
Benzoic_acid,_3,4-dihydroxy-_(3TMS)_613892.19_TRUE	0.410107556631148	0.396012183234757	0.470136030449772	0.418018292971766	0.37772409594083	0.47758974539579	0.372088451995292	0.426193252114301	0.496688096509766	0.415098470524725	0.432973533028748	0.331147107534488	0.362306369201931	0.346314557042429	0.37025277522974	0.411880667090788	0.305220546087341
Norvaline,_DL-_(3TMS)_445436.62_PRED	0.28338909995636	0.367685295210704	0.322407771514682	0.365247581739488	0.365344663909525	0.325659258951271	0.3758360271643	0.365088489696297	0.235672651438745	0.32891767801778	0.413951891400138	0.284175901437947	0.311321736083967	0.44448589654312	0.425337478557164	0.491433007911397	0.376557896008533
Tyramine,_3-methoxy-_(3TMS)_699102.56_TRUE	0.362908923786382	0.428634403886422	0.373752272918858	0.376552515139154	0.142074032597718	0.37189507474553	0.316106216481084	0.376627608666115	0.305744207058606	0.347345903678788	0.380874062308289	0.339060854127011	0.335976384387554	0.362966628228004	0.437959574142742	0.495043628375578	0.340204207887237
Tetradecanoic_acid,_12-methyl-,_methyl_ester_607457.12_PRED | Tetradecanoic_acid,_13-methyl-,_methyl_ester_604072.19_PRED	0.308964935516692	0.278396242438285	0.262633606947097	0.197317047073952	0.205266577560131	0.289592183948585	0.171724643808598	0.29733881617533	0.24075036214433	0.289645835487229	0.381805162197221	0.24884983151219	0.327504889428838	0.277967881245125	0.366689473350478	0.353103332195814	0.286298764018114
Nonacosane,_n-_992849.81_PRED	0.294703429463985	0.5314583444339	0.400509660976419	0.240302967442693	0.382049874977649	0.338778862306938	0.327907126595729	0.566240092646908	0.276589731455354	0.270362221175391	0.255288819408924	0.211972270152775	0.382337031900782	0.253603644871697	0.278723718196519	0.276012070308967	0.354445756318251
Glucose-6-phosphate_(1MEOX)_(6TMS)_BP_781714.75_PRED	0.199368411198195	0.328719409373921	NA	0.262729790383164	0.295697206162439	0.248232590186992	0.272930416524922	0.323148185803019	0.21106745523318	0.318632777438365	0.285118680884596	0.259190828461763	0.302616320789499	0.352826852807117	0.393786242445044	0.370284758658389	0.387411020124427
Allantoin_(4TMS)_643191.62_PRED	0.207425602540713	0.655585480665818	0.124681493950516	0.406054820650237	0.10389794295036	0.467964596936439	0.264636524172031	0.490243347701447	0.366537718883629	0.468855329025402	0.654967662518099	0.162143929269662	0.176222962228738	0.426392896664961	0.74074663922625	0.7554523862209	0.256380947363734
Ornithine_(3TMS)_587245.62_PRED	0.400705881339118	0.197726289957043	0.505030800545787	0.674065848356581	0.34732570136813	0.223501968939394	0.615698540143944	0.704622072938293	0.759817307162414	0.392212404740248	0.264601992599475	0.818885320201225	0.513863791305437	0.796371997121048	0.848013635111594	0.805646975400233	0.725778937031284
Butyric_acid,_2,4-diamino-,_DL-_(5TMS)_500761.19_PRED	0.356319043429103	0.462053022361463	0.340775382390888	0.34812553948879	0.43513395283299	0.455954697992445	0.355768838742643	0.229710659668091	0.315733678897957	0.523833155071974	0.451069538339966	0.274593386605596	0.37149998559785	0.381574803615256	0.379955559353111	0.327700465281644	0.30790626378069
Methionine sulfoxide [MP-1.1]	0.287427603621345	0.352831060804155	0.251094757151324	0.323519613714833	0.22942100687685	0.287383206980671	0.286225302756176	0.251184234590148	0.265837588696467	0.31549243989999	0.550096693620883	0.272738530389969	0.299233897328392	0.319537263798725	0.551869043449203	0.437283534004958	0.276919429091464
Hippuric_acid_(2TMS)_643255.94_TRUE	0.245353942907603	0.287377182984212	0.310176872949172	0.321699901925599	0.281703686434724	0.228341764421047	0.33842960606713	0.389911662550983	0.231339883136052	0.188217435034067	0.289892968637018	0.24884983151219	0.273472321701076	0.331822153923014	0.248798406217451	0.282623542045401	0.289905363879584
Methionine_(1TMS)_416320.09_PRED	0.370008791574965	0.438682361254342	0.381153477013183	0.274788573412827	0.460833961333447	0.262324248927708	0.387948844366719	0.454849502122711	0.314584160098851	0.302352532702259	0.378050672609238	0.230175937825626	0.315513524442043	0.362966628228004	0.388601033503543	0.40409374882021	0.432470627145847
Eicosatetraenoic_acid,_5,8,11,14-(Z,Z,Z,Z)-_(1TMS)_835936.56_TRUE	0.387829791422315	0.360656286443086	0.269392547806965	0.460653950559292	0.301364124096075	0.383190405185093	0.457604550573869	0.400804180327249	0.426940454788452	0.374855655646739	0.332834889662814	0.4114189354773	0.328467183822446	0.362419095723566	0.521693061871269	0.566058904640807	0.745759071451312
Guanidine (3TMS)	0.195672661127802	0.282944785612135	0.421344764839466	0.356688077017133	0.317892458891439	0.385916842090891	0.354210917404371	0.411093633247404	0.347450531807877	0.394268847394998	0.29223215310887	0.343731350236152	0.350915028730596	0.206717945827374	0.337233262154951	0.288979961388278	0.291679366973674
Asparagine_(4TMS)_BP1_479623.44_TRUE	0.134364183698111	0.17559089573018	0.157806388829615	0.152033749518686	0.29115743824778	0.154689280464617	0.178620329086462	0.264235041699466	0.159279724860629	0.215587217906227	0.136802269168087	0.177538651387198	0.156397045730143	0.203920905017476	0.586231938677565	0.618929067956381	0.17376871586446
Tetradecane-1,14-dioic_acid_(2TMS)_801298.94_PRED	0.283971407074001	0.250093737137688	0.314777600275975	0.348920003392855	0.321788851258345	0.258765565428992	0.401343352022811	0.416032381357824	0.330102485554162	0.334133601881908	0.320757938201747	0.369466322129473	0.441500441875669	0.383036222694659	0.337947416201902	0.408465157436455	0.434207084492607
Tyramine	0.11383479584713	0.499127948303799	0.251094757151324	0.287776055400613	0.129146474612291	0.195960984279225	0.209685973003264	0.335360780492748	NA	0.314857741627246	0.486082511030553	0.133594635921548	0.261119460699807	0.299239170437464	0.586716653546263	0.593906668601916	0.198372947611175
Lyxonic_acid_(5TMS)_539863.25_TRUE	0.216823112047097	0.206079444980392	0.237806606310444	0.109952717265868	0.247253875384454	0.131787402083638	0.220779284785655	0.205428673966295	0.112689094194105	0.166380153964363	0.255288819408924	0.211972270152775	0.161573405593756	0.199635942947353	0.267169559955125	0.198751651723144	0.282611110221685
Acetonitrile, 3-Indolyl- (1TMS) [MP-1.1]	0.158635905358543	0.397178544617223	0.29921037829678	0.168009760580952	0.277488221048317	0.226540604782483	0.252359090773568	0.174962305900342	NA	0.234435024640277	0.366278414639195	0.228594975014206	0.193985112749306	0.195238698445528	0.514896290862693	0.633317996959495	0.276919429091464
Butanoate, 2-Oxo- (1MEOX;1TMS) [MP-1.1]	0.207425602540713	0.0914837409364373	0.260033956270189	0.265816582779522	0.28513969448957	0.258765565428992	0.250536370212213	0.306346000661101	0.218680488147823	0.26540952024687	0.216944288623404	0.234068715611347	0.278688201880248	0.162549601416295	0.287617960639613	0.255514573437349	0.257108636751349
Gluconate 6-P (7TMS) [MP-1.1] | Gluconic_acid-6-phosphate_(7TMS)_802294.06_TRUE	0.371833139237884	0.250995519941567	0.368000345518683	0.363419163062711	0.383211080997742	0.322705189407187	0.41495729223229	0.416727326674533	0.42529556370232	0.360642735749892	0.314050360241208	0.444230504711759	0.4887717373772	0.462032769111023	0.405136045724871	0.454138315282939	0.470378767202639
Alanine (3TMS) [MP-2.1]	0.308455714792046	-0.00176040430236902	0.242662670637127	0.267645001456299	0.142074032597718	0.544190312324121	0.154038097997728	0.205428673966295	0.265837588696467	0.458284132802842	0.357966046257039	0.257169551894875	0.343169312573289	0.323732946426543	0.365484656137971	0.285377797383907	0.217931030975256
Xylulose-5-phosphate_(1MEOX)_(5TMS)_BP_716367.62_PRED | Ribulose-5-phosphate_(1MEOX)_(5TMS)_MP_715032.12_TRUE	0.345349639421267	0.320479560298512	0.345783353915596	0.406054820650237	0.341532124936714	0.332858118987043	0.302117722179443	0.396986845872076	0.356990307969833	0.409550134541002	0.389080863663532	0.297657219710794	0.265337126916137	0.141424559347585	0.421919627882549	0.30264934330715	0.462471550253252
Spermidine (5TMS) [MP-1.1]	0.115275955748203	0.787291809303011	0.276712398648563	0.485863602967006	0.261087297358724	0.504400833067553	0.244010862179746	0.563110428564906	0.449524497171934	0.404212635504943	0.78276233308552	0.245266639835335	0.317571462626453	0.440055910730634	0.880003545098796	1.01497833494282	NA
Cinnamic_acid,_4-hydroxy-,_cis-_(2TMS)_604876.38_PRED	0.252370907751293	0.258907447229468	0.271044392968605	0.271844473659241	0.162602858079823	0.210861100202825	0.245899014862917	0.312522570665173	0.264359022788531	0.223153241878044	0.215749428240679	0.227799262442115	0.298091372646494	0.225091432535372	0.226782422759227	0.226990196470365	0.28010581441346
Sedoheptulose,_2,7-anhydro-,_beta-_(4TMS)_647067.94_TRUE	0.262425185064386	0.423716431933783	0.260904571660608	0.194669407106211	0.175903689455462	0.204226259763122	0.237245518680928	0.332108843532014	0.256024362300627	0.189498129221714	0.376142791418256	0.327515173953603	0.213868792793626	0.376104677270917	0.411226494006858	0.359031757169323	0.321204614809267
Lactulose_(1MEOX)_(8TMS)_MP_858297.25_TRUE	0.174969583846139	0.477113122578636	0.297792705236764	0.123319585416814	0.230357732814935	0.26876901664844	0.211958758325145	0.303816741839312	0.193852002915975	0.251494433122228	0.554825597404088	0.179634356451869	0.18533481865034	0.169616690404839	0.598249298669223	0.60990555549994	0.210385164150772
Cyclopropanecarboxylic_acid,_1-amino-_(3TMS)_396111.84_TRUE	0.237317781401132	0.23400005319344	0.276712398648563	0.194669407106211	0.0788674601597505	0.258765565428992	0.161615022264872	0.174962305900342	0.226910608761309	0.255075382624117	0.202037723703124	0.126741011469506	0.263942777923288	0.278872565720386	0.223991210309573	0.234597352045092	0.193096168567962
Glutamine (4TMS) [MP-2.1]	0.0269843877131905	0.12425703227661	0.162300668841027	0.286681105162532	0.138931663984022	0.0921719173434346	0.10865468802361	0.201054409659681	0.218680488147823	0.206531884672469	0.17397032542904	0.123924882223942	0.166597497292095	0.0917762120672608	0.87258980146953	0.380818212052873	0.27301225193388
Spermine (6TMS) [MP-1.1]	0.0940106206887465	0.686138580007809	0.198481585537675	0.102901426544481	0.137338790842127	0.0885857521819521	0.220779284785655	0.442588070533784	0.127994043879454	0.237392956023136	0.711975007612135	0.145310365794794	0.161573405593756	0.149417430122844	0.633069484860232	0.902117622288686	0.15728213600279
Spermidine_(5TMS)_724912.5_TRUE	0.172872603584575	0.764666601691682	0.241701601311964	0.41746527292247	0.187057592446009	0.438030182049556	0.253263727841095	0.564994542555268	0.416860618334418	0.403825258016775	0.76943901523951	0.225390826537617	0.288665157429831	0.390158305478322	0.854136763434707	1.00052874347511	NA
Fructose-2,6-diphosphate_(7TMS)_914781.75_PRED | Fructose-2,6-diphosphate_(7TMS)_912183.75_PRED	0.599090027045659	0.518854827606096	0.610311998774139	0.543282927009878	0.557056763568379	0.300283625419596	0.602916395606064	0.659455262310037	0.617437639264291	0.42741566714476	0.466898657803775	0.624862153815521	0.617543170095457	0.406110856607643	NA	0.630314609120135	0.64487934926428
Gluconic_acid,_2-oxo-_(1MEOX)_(5TMS)_BP_593592.06_TRUE	0.115275955748203	0.16410950226405	0.166688355023338	0.183695963486828	0.0599086885659904	-0.00519894845141252	0.164560577469129	0.296015695602395	0.152884762314291	0.0875219756096177	0.0819966893340297	0.307145126349465	0.145548523945794	0.289364642233695	0.335795752296666	0.272111475387293	0.22426049779909
Sucrose_(8TMS)_841296.94_TRUE	0.110918654020264	0.16410950226405	0.296364084786049	0.221180191794105	0.168046631356915	0.229533545118147	0.269657561030361	0.262652924441593	0.19279138067643	0.228369165742173	0.144173731662196	0.109143766323099	0.208142888935767	0.166120343863907	0.24387249609307	0.20774255995293	0.390338438083543
Glycylglycine_(4TMS)_591933.56_TRUE	0.100337642862012	0.0392749854199781	0.232819635118241	0.300958405629304	0.165346177782593	0.0486469094799398	0.261211434253305	0.382556510225272	0.348911000050193	0.194531653907774	0.0210268681107196	0.445664692159066	0.247803099037937	0.448801943189813	0.513403244983264	0.447124812506236	0.364558993898574
Spermine_(6TMS)_883354.38_TRUE	0.0246659817525841	0.622442679518723	0.146874618504735	0.141764922408893	0.175903689455462	0.231307941254794	0.196657863130998	0.399286640016468	0.176163354503424	-0.0241875452783431	0.659301906769683	0.133594635921548	0.156397045730143	0.184506915329912	0.582468434897326	0.85778025897676	0.167622166284996
Cinnamic_acid,_3-hydroxy-,_cis-_(2TMS)_599148.38_TRUE	0.210897875346125	0.230998373804914	0.255618342632312	0.21806064015315	0.0495876812235419	0.293937919517421	0.200303393599834	0.277898977074018	0.17029666952086	0.136452851049434	0.106013247120522	0.250263396443358	0.114965867934314	0.263777581832395	0.37488888776615	0.361917863190725	0.260699451543499

## Sheet: CB
Table includes multiple worksheets – one for each tissue
hum - humanized mice
wt - wild type
number - animal ID
Metabolites	hum_220_cer	hum_300_cer	hum_319_cer	hum_323_cer	hum_324_cer	hum_329_cer	hum_333_cer	hum_350_cer	Wt_352_cer	hum_362_cer	hum_363_cer	Wt_422_cer	Wt_424_cer	Wt_426_cer	hum_429_cer	hum_436_cer	Wt_626_cer	Wt_629_cer	Wt_630_cer	Wt_632_cer
Orthophosphate | Phosphoric_acid_(3TMS)_333095_TRUE	1.80617607185792	1.81250779157905	1.84841984730546	1.79505636204525	1.85461548833734	1.84085594614429	1.82601204531239	1.94717507736301	1.79301160689879	1.77555428841324	1.72605091281474	1.78084352992398	1.79444446500096	1.81043589188492	1.75463801639845	1.72270487758353	1.81204791914931	1.75897423574779	1.74741048295415	1.84361023376172
Glucuronic_acid-3,6-lactone_(1MEOX)_(3TMS)_MP_657311_TRUE | Inositol, myo- (6TMS) [MP-1.1]	1.7950060116728	1.78514256234372	1.8005471260277	1.77469843122246	1.797134470781	1.77262547075226	1.79837044423094	1.76383227464135	1.76177177376523	1.76010576576865	1.72724086607114	1.77975805517882	1.79267414456199	1.7752783394052	1.73353359887929	1.70835033216053	1.78212569483296	1.73551630267144	1.71146953268279	1.75268434259736
Cinnamic_acid,_3-methoxy-,_trans-_(1TMS)_649428.75_TRUE | Inositol,_myo-_(6TMS)_654785.31_TRUE	1.70427962536815	1.69367203464886	1.70807117997855	1.68920693377691	1.70420218422034	1.68187878225063	1.70720252963186	1.66514776676924	1.67146711510113	1.66926119185754	1.64283617890919	1.69522570082834	1.70788700767217	1.68481644991543	1.65091092116463	1.62263696667295	1.69056620726129	1.64989555777789	1.62470887816062	1.65538981068559
Glutamate (3TMS) [MP-1.1] | Glutamic_acid_(3TMS)_509813.31_PRED	1.69135777871997	1.69680785144766	1.71042135733758	1.68701175401072	1.69765284411691	1.71596983190234	1.68003801209757	1.65365293386138	1.64590662557125	1.62630333720373	1.61598822726051	1.67749558625747	1.69189341552085	1.70326408439742	1.66078955990901	1.60643495986575	1.69388456958923	1.61738425452914	1.617194921685	1.650222278095
Galactaric_acid_(6TMS)_658294.38_TRUE	1.66498264666235	1.64750482477655	1.68160437868937	1.64142921316028	1.6823147392187	1.65770000063695	1.66408942846802	1.64831203280608	1.645156121062	1.64151594735787	1.58708008675865	1.6349409373091	1.65850872426638	1.65680278125635	1.60113535993729	1.58165065656244	1.65944192635065	1.61406630998475	1.58665865512221	1.64870740676569
Pyroglutamate (2TMS) [MP-1.1] | Pyroglutamic_acid_(2TMS)_507313.84_TRUE	1.62235936020836	1.62475496956637	1.63628476872598	NA	1.62760423484889	1.64665769338164	1.64307598711126	1.59928718041467	1.58218317569934	1.56217558976559	1.57334621152658	1.60554875819167	1.62906436906115	1.63266666045802	1.60771824634578	1.53469948339331	1.62270532958746	1.55368178839354	1.56438418557621	1.58855028533631
Arginine [MP-1.1] | Creatinine_(3TMS)_489565_TRUE	1.61725615209079	1.58974364612301	1.59036394256908	1.59795793582473	1.63129267748191	1.65856167187831	1.60509550524035	1.6363349142167	1.49643554653853	1.53213241098241	1.50146375975373	1.63688396526414	1.64439389362769	1.62209935963926	1.62997207514468	1.5122706587965	1.62585138653565	1.57531456023973	1.58471344048882	1.60237281990157
Butanoate, 4-Amino- (3TMS) [MP-1.1]	1.59052017477914	1.55820717513258	1.559249311653	1.52095623783706	1.51095446077937	1.48503078185371	1.58032773837033	1.37432871997148	1.58338666664795	1.52230986926326	1.55169751175249	1.59746284387655	1.59050123991216	1.51751142624843	1.47865771633271	1.44984859283948	1.48507160201753	1.46932504678703	1.42069884357158	1.50797002749882
Asparagine (3TMS) [MP-1.1] | Aspartic_acid_(4TMS)_550990.62_TRUE | Caproic_acid,_6-amino-_(3TMS)_546902.25_TRUE	1.58851844244478	1.56913820587644	1.64737905762599	1.67537488403989	1.64269904224561	1.60563156335968	1.59079493189681	1.71693816155515	1.59304066513808	1.57180551059351	1.51201116626604	1.54428856049103	1.57425684725121	1.58962311108259	1.62106864468048	1.51951847120476	1.5801498897214	1.53311768841824	1.50773881964749	1.65530797797205
Ascorbate, 1-Dehydro- (dimer;2MEOX) [MP-1.1] | Dehydroascorbic_acid_dimer_(2MEOX)_MP_625466.25_TRUE	1.58155193508598	1.6037889059108	1.54379600475232	1.63793992222663	1.59793190334265	1.63542327210124	1.6054481771749	1.55646013609109	1.50331938799299	1.50747043968941	1.5192759766257	1.5867721537781	1.60839539430552	1.61348778662445	1.61713575342328	1.47553598101101	1.56465746925439	1.53652392023935	1.56820246754298	1.59462039980051
Ethanolamine_(3TMS)_321815.91_PRED | Glycine (3TMS) [MP-1.1] | Glycine_(3TMS)_326251.06_TRUE	1.54115846825815	1.56089206110848	1.5440394740194	1.50128053583387	1.46970360398744	1.43540876842823	1.54333054389002	1.40829484481956	1.51777430285642	1.48213569008367	1.5616713255356	1.47717643879325	1.52562355868353	1.46145510062376	1.48304094454321	1.4241950316413	1.43781341489941	1.37869788441546	1.4185379968009	1.51245373062273
Aspartate (3TMS) [MP-1.1] | Aspartic_acid_(3TMS)_458039.69_TRUE	1.49097675076548	1.53408093732312	1.50503965935032	1.55174916000692	1.48932845960693	1.52175361815807	1.49971621470602	1.40882358627684	1.46704655155874	1.47366005436009	1.48618115641392	1.54264407688024	1.51940967455613	1.51855198225124	1.52646729598152	1.40046907172692	1.51878159069664	1.45955030514009	1.46062646996184	1.45473992394576
Butanoic_acid,_4-amino-_(3TMS)_452983.28_TRUE	1.48075642352394	1.52088962811292	1.4990057399687	1.53723553575267	1.48300210001368	1.50857108999717	1.48889525723296	1.41369985240524	1.45866815064312	1.46349896755041	1.47670390410333	1.5308231980472	1.50759743016552	1.50626831957054	1.51178684580812	1.39191517721172	1.50851814785472	1.45019826882526	1.44907098875877	1.44890905311031
Phenethylamine_(2TMS)_490740.62_TRUE	1.47241181794123	1.44281669803747	1.44449733314953	1.45501848634879	1.48606317728166	1.51190800626051	1.46179883604781	1.4877082044292	1.35731106950885	1.39504039975679	1.36816505100628	1.49995982212478	1.5031745488252	1.47903989445276	1.49218213180255	1.37671936363904	1.48021816103937	1.44112297679037	1.44774685659334	1.45664981249335
Hypotaurine_(3TMS)_509415.53_TRUE	1.46453742768728	1.44984889992421	1.49173143700423	1.44201461764499	1.47541103268432	1.48776989533175	1.45781885331832	1.44522572491645	1.43262412072382	1.41276437012406	1.39017668044568	1.44440738735071	1.45850019227731	1.47101417632438	1.43159060871162	1.39445122656301	1.45667248253658	1.40916879980651	1.39273278541709	1.44773637775442
Asparagine_(3TMS)_550488.31_TRUE	1.45940869664884	1.43815732775914	1.50707737288463	1.56523651342906	1.490813061869	1.46983185721685	1.46338259238096	1.54057947711292	1.46102860008837	1.44315980433912	1.38201824986787	1.41771578789448	1.43747323275525	1.46686952559825	1.51520181627008	1.40193134049561	1.45959055539682	1.39926643999319	1.38585707058062	1.50485712182339
Oxalic_acid_(2TMS)_236929.91_PRED	1.45583833009864	1.45994682156729	1.433001758851	1.36736762370392	1.36688024886038	1.38566577322275	1.32790150891388	1.49652768428295	1.34898503865413	1.36928469376572	1.42740828943301	1.47569447787602	1.41867775135427	1.44088714487549	1.4203477496678	1.44571436287056	1.56615651611483	1.25774476535691	1.28401407051874	1.33310178475432
Gluconate|Galactonate [MP-1.1]	1.44862793690231	1.46615071214198	1.40929253621985	1.49587153463498	1.4615315270238	1.49923750255968	1.46906661927471	1.42056015025119	1.37198096790014	1.37466018394235	1.39076782836151	1.45446548252698	1.47398597262659	1.4796397341414	1.47741922942321	1.35181316672336	1.4311869277061	1.41078838461115	1.4379911092081	1.45881268033565
Benzoic_acid,_4-amino-_(2TMS)_650574.94_TRUE	1.42498333466204	1.40529378779545	1.41210235572401	1.40854300810771	1.4145027079988	1.39720756016211	1.42041621843327	1.35811541030437	1.38869621295683	1.38980303158572	1.37133538591827	1.41873432487918	1.43022836231345	1.40576373976471	1.37938595122212	1.35710748025053	1.4109970998546	1.38546436572772	1.35725133268443	1.36821575716062
Ethanolamine [MP-1.1]	1.4112860745429	1.44202703438838	1.45618888900025	1.28234904294279	1.3657858790219	1.28151525919851	1.43163426398347	1.38817739735523	1.41300668708741	1.44480038690862	1.42474724298927	1.30061142424506	1.30006318559463	1.28073203231031	1.28614533893682	1.32131810434644	1.35602457524006	1.37532842386937	1.29375275160387	1.41751577963664
Cinnamic_acid,_3-hydroxy-,_trans-_(2TMS)_653564.75_TRUE	1.40930391330226	1.3923335076072	1.40036602006644	1.39588904098073	1.40111217950823	1.38330088635967	1.4115664160318	1.33735026256948	1.37673623487193	1.37876276584868	1.36170359654981	1.40815692172527	1.41613866394499	1.39291435379595	1.36786643765044	1.34906302020207	1.40266773143407	1.3743673119986	1.34823999122775	1.35279399828589
Alanine (2TMS) [MP-1.1] | Alanine_(2TMS)_207563.2_TRUE	1.39873467239497	1.41000724259575	1.39734912754974	1.35460290660485	1.37158113561816	1.37073376217494	1.36411724938469	1.37200424251294	1.33355999689725	1.31912465879347	1.36903076025384	1.33968815651441	1.37461364076477	1.35693841712176	1.36038950504203	1.32529212443914	1.39728529474083	1.31845618215557	1.36326661862107	1.3408811772961
Nonan-1-ol,_n-_(1TMS)_336924.19_PRED	1.39540076109898	1.43367558222508	1.40496270530309	1.42882381407619	1.41979607221329	1.41188978776649	1.41637508747151	1.50729913969896	1.36055535852827	1.35507301158607	1.34666369354306	1.41304575196919	1.4091401214452	1.39773358270837	1.41263557037457	1.33231839302216	1.4000441632831	1.37534178652115	1.39869750104297	1.40727599749972
Serine (3TMS) [MP-1.1] | Serine_(3TMS)_356866_TRUE	1.39359013807687	1.44671960094871	1.43075440491717	1.40689794544234	1.40848667611037	1.39972626945441	1.43886754679376	1.38765991102796	1.36298504612393	1.37130149932938	1.37809107248847	1.41142133915459	1.42501448940197	1.41139277799748	1.39350794102934	1.35000294001659	1.42298328608324	1.38315255557779	1.390444886504	1.36878602918571
Proline [MP-1.1] | Proline_(2TMS)_340374.03_PRED	1.38714602000027	1.39177558531712	1.41918317579579	1.37944415146238	1.39302731057211	1.35793027601459	1.37831159665661	1.41853179097579	1.36396727134081	1.32545404101695	1.38542172651823	1.35549456650002	1.35330914956751	1.35310257662094	1.39122545555913	1.32759500483441	1.40901211394066	1.3145684075591	1.34578323419418	1.33491636294657
Succinic_acid_(2TMS)_365265.25_TRUE	1.37877409375485	1.40279070156345	1.36675801141474	1.380098274753	1.32115702843733	1.35789590431044	1.32725595915826	1.34334145440166	1.27629771390975	1.24849949526161	1.2685723942026	1.372500681498	1.38005262404029	1.36714511862897	1.36327376012225	1.27403977666003	1.35047624881225	1.2500870885184	1.26962809436207	1.29293504874826
Alanine_(3TMS)_355868.03_PRED | Pyruvic_acid,_3-hydroxy-_(1MEOX)_(2TMS)_BP_355231.75_PRED	1.34228703179197	1.39121998840791	1.37837968639746	1.35275291626528	1.36198398602461	1.34792487403421	1.38551537376051	1.340115891736	1.31589120443171	1.32197242707697	1.33099809585001	1.36127570404116	1.37043361533137	1.36050713921907	1.33978811456837	1.30179872374126	1.37024723851039	1.33273603926596	1.34261412784881	1.31986853864588
Homoserine_(4TMS)_510930.09_TRUE	1.33744364075842	1.32456065844216	1.34744293522132	1.32579758548403	1.33579148557478	1.3569559522427	1.33503591682298	1.28409568180711	1.29542502253453	1.2807643123979	1.27950069029422	1.32912455752664	1.33799884176294	1.34729212811771	1.32184676637308	1.27790450718556	1.3388156200769	1.2866906146095	1.27907791590031	1.29506441065016
Glutamine [MP-1.1] | Glutamine,_DL-_(3TMS)_599684.19_PRED	1.32199144596795	1.15733010351569	1.37293037033711	1.19656764723898	1.36029333516538	1.3099193599317	1.04605657556526	1.44979066770627	1.32293524126092	1.20365467312624	1.1411059591652	1.06214183850633	1.10494217590587	1.20328493947572	0.925046212000329	1.42003253451071	1.31867066661	1.31963515672364	1.10761862457572	1.37861794845284
Adenine_(1TMS)_586048_PRED	1.31346079637089	1.35699008875508	1.34362212608372	1.30094060667056	1.32295587239871	1.29170553954378	1.3229476751038	1.35856892014156	1.32118212448128	1.27681984636327	1.28982223408119	1.27813372786491	1.30306632959411	1.28656807889629	1.24803786855369	1.20459146271508	1.26760612243969	1.20828249192181	1.22200651924829	1.33525223406715
Nonadecanoic_acid_methyl_ester_324789.09_PRED	1.30803234104431	1.31082668323553	1.36952490022823	1.29848689493664	1.37291520455902	1.34739110312533	1.31595284809629	1.46538600750567	1.32339532163565	1.31675994562202	1.27061317334669	1.28911173463886	1.31503356541676	1.31944850065159	1.27731215197102	1.25612268798998	1.31974017424095	1.28465283882196	1.25974145471371	1.38001053681949
Indole-3-ethanol,_1H-_(2TMS)_652683.19_PRED	1.28420902791545	1.26451764417114	1.26819317671211	1.27384045375598	1.26793523271337	1.25048953955958	1.28314182797356	1.24448402262113	1.2466126983746	1.24683745161577	1.24679288095589	1.29908469312961	1.30007108570974	1.26611677334867	1.25643691998301	1.22850200492279	1.27157108054303	1.25652889534091	1.22586063714997	1.22581088671144
Pantothenic_acid,_D-_(4TMS)_624853.5_PRED	1.2840542697689	1.29897440748387	1.24548557141514	1.3318842353156	1.29653354375665	1.33414070705057	1.30495477238255	1.25579157994976	1.20880215487318	1.21658476400677	1.23231193342323	1.29389447724004	1.31385737250556	1.31551002976354	1.31801631331152	1.20065295260943	1.2712854729677	1.2587531268969	1.28042866857662	1.29372457073678
Butyric_acid,_3-amino-,_DL-_(2TMS)_281258.31_PRED	1.28140089526796	1.30892399972913	1.32565788401415	1.15523552486965	1.2367130451382	1.15655130485794	1.29840746947272	1.25674204569479	1.2863274656397	1.31720036794311	1.29862862167715	1.18042528018523	1.1756380696905	1.15451826089541	1.16346194985	1.19767339701537	1.23090383056885	1.25620400823076	1.17323545358071	1.28514889077624
Glycylglycine_(3TMS)_628479.25_TRUE	1.26092272732405	1.27600607389443	1.21526134903523	1.32146995028713	1.26961397945734	1.31342413076845	1.27903510520415	1.20640667789133	1.18366940621512	1.19210075480593	1.21244722584886	1.27327941981406	1.29282284309638	1.29696680610551	1.31011860494559	1.17220109564822	1.24679537029457	1.23519916394679	1.26349192585806	1.26919661897769
Threonine (3TMS) [MP-1.1] | Threonine,_allo-_(3TMS)_370722.56_PRED | Threonine_(3TMS)_370274.69_PRED	1.25685319028187	1.25121684716489	1.27319802119409	1.2317508951297	1.23036580070997	1.22126091427599	1.22819644980306	1.24696620984312	1.25337576721007	1.19984775503212	1.25005795497353	1.248388339073	1.23542388570023	1.22528464036265	1.22635434265073	1.20826531831462	1.26755029584531	1.1967511255315	1.19341387650601	1.18251825049847
Aspartic_acid_(2TMS)_458076.97_TRUE | Threonate (4TMS) [MP-1.1] | Threonic_acid_(4TMS)_458765.47_TRUE	1.25142713115762	1.28798472954269	1.25964186563761	1.30786806186446	1.2506455741426	1.27670705931347	1.25938028098708	1.17520700504206	1.22934782405138	1.23562625402742	1.25884502824212	1.30391696555432	1.28367620416633	1.28055139223582	1.28879035320739	1.17710511062185	1.27697003729718	1.23585677650273	1.23147320358661	1.21256347015898
Inosine_(4TMS)_904803.88_TRUE	1.24814643922927	1.26917393643306	1.26112225657008	1.15976998626421	1.20192845453294	1.13203598395392	1.25828577985503	1.17395603309482	1.17979448268474	1.26861453344532	1.23751615839105	1.1862373458949	1.1251544885653	1.12257983611874	1.16844263490366	1.24276181131143	1.26118474758108	1.27724203086367	1.17755545728995	1.21371513021247
Dehydroascorbic_acid_(2MEOX)_BP_639171.94_PRED	1.2354853010037	1.26363178575568	1.19605249761544	1.31544768170547	1.2552715988416	1.28945829306706	1.26302477231273	1.21707209206143	1.18367751958111	1.16772848491006	1.18704685523623	1.25295538626385	1.26726300960392	1.26686725844645	1.30083040622587	1.16075235364933	1.2251937508371	1.2094692447002	1.23848201405659	1.2456290551118
Erythronic_acid-1,4-lactone_(2TMS)_462181.38_TRUE	1.23445714373344	1.27080060542085	1.23698795810835	1.29841614405846	1.22301033662604	1.25811051141059	1.24173882935357	1.12975042545495	1.2084257165499	1.21686177835777	1.24026863754575	1.29186242271137	1.26580945979948	1.26517012521236	1.2822829585711	1.15549179327335	1.2618331420334	1.21641279955753	1.21672737597907	1.19415470144892
Glyceraldehyde-3-phosphate_(1MEOX)_(3TMS)_BP_571519.81_TRUE | Glyceraldehyde-3-phosphate_(1MEOX)_(3TMS)_MP_577300.12_TRUE | Glycerol 3-P (|Glycerol 1-P) [MP-1.1] | Glycerol-3-phosphate_(4TMS)_574746.69_TRUE	1.22987204985541	1.23324542028693	1.19465464400101	1.22278992408068	1.18844597498217	1.19560378084947	1.2167843828147	1.13540567635153	1.17079693359374	1.16296366891379	1.20116581800962	1.2655081994322	1.22574662265729	1.19752843622067	1.21324843598527	1.15766185072274	1.23620837503105	1.16411787503262	1.17291650616986	1.11046257388685
Rhamnose_(1MEOX)_(4TMS)_BP_570616.31_PRED	1.22651321161936	1.20982265265872	1.16413297219724	1.22025912711151	1.18555426752215	1.24747062661253	1.22145290303643	1.0741441882803	1.1684328191156	1.14745629684633	1.19658539565453	1.28275569280503	1.26411292567928	1.21830769783785	1.21205141675878	1.17054631880391	1.20455435610952	1.19164526038717	1.18210799120606	1.1452608096551
similar_to_Asparagine_Derivate_505075.09_PRED	1.22379866712881	1.21921123549118	1.22344853874946	1.22548399666603	1.2130755847348	1.24497559313976	1.20873006233667	1.15099654333582	1.17274643899666	1.16107855985785	1.17167725628027	1.22849376774372	1.23248817403408	1.24019880642522	1.21927139601198	1.16537724938528	1.22920764872281	1.17600944204229	1.16970925830137	1.16663299738474
Tartaric_acid_(4TMS)_511834.44_TRUE | Xylulose_(1MEOX)_(4TMS)_MP_509094.19_TRUE	1.21323982445925	1.19228009216362	1.22649429829996	1.18901611732902	1.21941804041918	1.22886981953802	1.2040009784164	1.16382001921268	1.18261940941339	1.1659713606242	1.15070760273374	1.19966769930422	1.20329742314089	1.2158546947353	1.18797031325888	1.1549813928025	1.20792221945361	1.17437027230864	1.15437617532805	1.18532025542388
Lysine (3TMS) [MP-1.1] | Lysine_(4TMS)_616386.69_TRUE	1.20368769985927	1.21349916890595	1.18045353034019	1.22803922898991	1.15198659165087	1.21031136561872	1.19738419382087	1.15275189477954	1.16544603697847	1.18765537930793	1.16678437437993	1.21451219396647	1.23706626693789	1.20736013566751	1.17182523829073	1.1312428018675	1.19697701709054	1.11045328010052	1.1106155017236	1.18386243754269
Tropine_(1TMS)_336960.03_PRED	1.20111510332211	1.22267973679026	1.20496341762574	1.22261004400599	1.2256819696201	1.21936232869926	1.22091283156297	1.27026251938649	1.17363714375368	1.17274831479494	1.16302219161005	1.21371714297578	1.21452211976805	1.21117311841383	1.21010188348128	1.15124519782203	1.21397343114765	1.19454061599527	1.20284190479158	1.20287929981451
Butanoic_acid,_2,4-diamino-_(4TMS)_519172.62_TRUE | Putrescine (3TMS) [MP-1.1]	1.19147863817061	1.17965740422841	1.17836250956899	1.05292656355289	1.14342840338003	0.999121271466715	1.16832289457685	1.08781116110961	1.16475110366328	1.14274148709677	1.15600525131959	1.04789644296192	1.08343884050374	1.07158162566851	1.096198967902	1.08972014884946	1.13105419379869	1.07969551406179	1.10334976652317	1.157512140665
Ribose_(1MEOX)_(4TMS)_MP_503578.66_TRUE	1.18852229050006	1.16862739546719	1.21293377794431	1.16984691125424	1.1948078689975	1.20277379765463	1.18159975690233	1.15748891018832	1.16179337866095	1.14557390806594	1.13049297793658	1.18066624116025	1.18091155438359	1.19566348141684	1.16607953857091	1.13578478474536	1.1866474877901	1.15222093353735	1.13329889923882	1.1626218724662
Malate (3TMS) [MP-1.1]	1.18592635740736	1.16213506120306	1.15998503699868	1.19155182781846	1.13843179102862	1.16671082036968	1.12662335382305	1.13970184082948	1.09872649151704	1.06595939368737	1.12980691173667	1.15017326143927	1.19361477514468	1.17435874523209	1.1773438397162	1.08588345314662	1.15501506381991	1.06384282606962	1.10949499558793	1.06911223871416
Adenosine 5-P (|ADP|ATP) (5TMS) [MP-1.1]	1.1791157167752	1.07202836653889	1.17897263650899	1.26461488750364	1.16023087357892	1.27758628439064	1.05864054896953	1.20078830798664	1.14254220447673	1.17252075121179	1.11066323388752	1.28396618140547	1.20617716778609	1.20056683610916	1.20870947756689	1.17764153273778	1.21403987340247	1.15561352123333	1.11060212966724	1.21248325273154
Mannitol|Sorbitol (6TMS) [MP-1.1]	1.17571196646839	1.19188897059807	1.18561179690038	1.15363994292158	1.14644461460522	1.11453444109123	1.17587986595946	1.14950227275741	1.18189106274364	1.1172494808326	1.15121798525626	1.12803403200793	1.16751132945198	1.13129696744777	1.10113604210617	1.05660265889714	1.09148719179381	1.05999045679818	1.07070059395601	1.17787096482069
Octadecanoic_acid_(1TMS)_770496.62_PRED | Octadecatrienoic_acid,_6,9,12-(Z,Z,Z)-,_n-_(1TMS)_768264.69_PRED | Octadecenoic_acid,_9-(E)-_(1TMS)_771147.94_TRUE | Octadecenoic_acid,_9-(Z)-_(1TMS)_769944.38_TRUE | Stearate [MP-1.1]	1.17144205917483	1.14116781548525	1.26038764512782	1.15639889605518	1.23550833429792	1.21775633282101	1.14675725896251	1.27434451653048	1.19683182426982	1.18467334053826	1.14284336110315	1.15512598422955	1.15078622016338	1.21473568529793	1.1379183227347	1.16851365775727	1.22102207892121	1.26404962602032	1.14942608954137	1.21080458035017
Glutamine,_N-acetyl-,_DL-_(3TMS)_655207.31_PRED	1.17095712451986	1.14486750991627	1.16037151325563	1.15805557344787	1.15834846133831	1.14568068881058	1.16598019249786	1.10841890938218	1.14265158200787	1.14346879746744	1.12575696762361	1.17232811914545	1.18120747287916	1.15809803673445	1.14271427822249	1.12098450396929	1.16771174599536	1.15184374654276	1.11702173272399	1.11382059615034
Propane-1,3-diol,_2-amino-2-methyl-_(2TMS)_245096.62_TRUE	1.16746691504567	1.16143991248358	1.1377228197683	1.07940533866887	1.07334983720866	1.09721858379044	1.03710061441302	1.18991878869729	1.06114505198172	1.08602789074435	1.14673266113459	1.19528797973283	1.13419935516468	1.15482918734383	1.14410410189377	1.17024800847444	1.27583419579822	0.988251149502657	1.00627509716662	1.03790745059774
Homoserine_lactone_(2TMS)_458933.88_PRED	1.16504055925322	1.20167672508104	1.17574976629315	1.22881540789129	1.1555518861558	1.19779826520297	1.17218458357067	1.06207001797256	1.14568496945068	1.15382998587389	1.1776214509847	1.22701381061957	1.20045811066438	1.19838474237811	1.2139061678505	1.09894932438037	1.19635305246743	1.16303604112761	1.15164540755739	1.1260656268669
Citrate (4TMS) [MP-1.1] | Citric_acid_(4TMS)_594326.44_PRED	1.16433428134028	1.1386958811274	1.12913516723153	1.14191587136281	1.13461925335223	1.15008421813059	1.14973678768339	1.15567466092775	1.13646558134514	1.1102845581642	1.15091965861087	1.10319603087651	1.1407425554937	1.0988258632258	1.11748730067287	1.14274462000072	1.09886390894391	1.1170301786	1.14032648043863	1.14873494434204
Pentadecanoic_acid_methyl_ester,_n-_620606.38_PRED	1.15979525511448	1.16742828033344	1.10917951323736	1.20727276461579	1.16410573695548	1.2081247224348	1.17152510691062	1.09967372136175	1.07682194504019	1.08296742961237	1.11219452328345	1.16915414871108	1.18657099880997	1.18700812854347	1.20191177635059	1.0739037359186	1.14287004433559	1.13440802229909	1.162703131412	1.16285184176945
Hexadecanoate (1TMS) [MP-1.1] | Hexadecanoate|Hexadecenoate, 9Z- (1TMS) [MP-1.1] | Hexadecanoic_acid_(1TMS)_697328.75_TRUE | Hexadecenoate, 9Z- (1TMS) [MP-1.1] | Hexadecenoic_acid,_9-(Z)-_(1TMS)_696619.5_TRUE	1.15502067986554	1.1259935649455	1.22216906655288	1.13667438477342	1.18652551734061	1.18090921365208	1.15083912353808	1.26937550487699	1.18270512548745	1.18088030417934	1.1187551941609	1.14860224873167	1.12170050865263	1.20518757412428	1.11874617046017	1.14007906507488	1.23264184979958	1.23413120305116	1.14945741917201	1.19411812009213
Glycine,_N-acetyl-_(1TMS)_334790.31_PRED	1.14086528860321	1.17611400452818	1.14272617800588	1.18023406707598	1.15830244700565	1.15904198005412	1.1630222643698	1.23362918640983	1.09683148905089	NA	1.10697888363995	1.16560840272072	1.15807492901986	1.15048624462166	1.17066866770169	1.09599075688589	1.15310713056422	1.13776430177839	1.15876221993865	1.14918610753756
Mevalonic_acid-1,5-lactone_(1TMS)_454636.47_TRUE	1.13371018261711	1.16734192879926	1.13939617290929	1.19805137908372	1.13353467140131	1.15992684707437	1.1414878475244	1.05150381442909	1.11455612635174	1.12474508270252	1.14563608841235	1.19547572139905	1.164814470106	1.16478649122956	1.18090203575892	1.07008425889593	1.16745665100247	1.128357368845	1.12577224024183	1.09875984177868
Tridecan-1-ol,_n-_(1TMS)_547762.06_PRED	1.13358160151973	1.10909182969139	1.18444855803984	1.21624475895871	1.17967646616301	1.15122474208045	1.13455715211261	1.23114404554531	1.14293770248892	1.12379021193974	1.08013322090148	1.10326087657679	1.13038877750075	1.14108650376761	1.17894312792577	1.08797622457886	1.13064254704965	1.10918245640011	1.08066968606499	1.19343381306949
Valine (2TMS) [MP-1.1] | Valine_(2TMS)_272492.56_PRED	1.13354097610745	1.13715699794713	1.15489433809701	1.09764011511032	1.12968692164263	1.0954157220176	1.11731995591881	1.14265623198018	1.12384498052522	1.08574195783549	1.13920425321552	1.13286137751892	1.11425010953636	1.10813663976367	1.12190770268367	1.10966082176478	1.14966708974731	1.10219481302892	1.11527908943488	1.10138127141999
Nonadecane_653263.69_PRED	1.12623728533788	1.10552207794859	1.10884148293471	1.11939541236138	1.09377333276217	1.08865197386061	1.12784231321178	1.09190390355254	1.08240697541686	1.08174211660728	1.10132330218554	1.15102541831335	1.14403837400559	1.09724417683248	1.10469973100771	1.08060037256071	1.11130051302391	1.10981177976224	1.07630580130671	1.05743890541913
Serine_(2TMS)_328955.09_PRED	1.1112873080079	1.14023931179388	1.11496589646245	1.1460991707363	1.12751705812001	1.12617052243	1.12989566654818	1.19882652069222	1.0794279604221	1.08216730620211	1.06884801230517	1.13124781443733	1.12850623938447	1.11647118240314	1.13567012897383	1.06644674145337	1.11731082008801	1.10721894136174	1.12501155330308	1.11612381933213
Cinnamic_acid,_3-methoxy-,_cis-_(1TMS)_587950.5_TRUE	1.10336438090758	1.13941687449223	1.1392344284113	1.09961447927671	1.13276443439494	1.11234938147076	1.11621266828598	1.19028493578274	1.10231248680866	1.09074196293298	1.07183841326654	1.08086807950602	1.08863304071347	1.08918285470113	1.05555659768213	1.0428352998018	1.09585416586279	1.03769850588201	1.0490922827143	1.14134229629385
Leucine (2TMS) [MP-1.1] | Leucine_(2TMS)_306195.44_TRUE	1.08882630095935	1.06297410310415	1.09601645761913	1.05470238337379	1.09036244962198	1.04922902873715	1.07546826601038	1.05938130427348	1.06021912280114	1.04366827035318	1.08988004731646	1.0783060992125	1.10189265153801	1.04729945518629	1.0521956678111	1.03715710815534	1.11881251392263	1.08996897181804	1.06516499641413	1.05399546666401
Glycerol ((3TMS)) [MP-1.1] | Glycerol_(3TMS)_292962.19_PRED	1.08879964994425	1.04713756039415	1.1261563976053	1.04863313071017	1.03067916820215	1.01734089786559	1.02721637016318	1.08762287487394	1.05959029566767	1.09283244886595	1.08683166014085	1.08276552011832	1.05585168199673	1.02232012913026	1.05900987451194	1.0505406684507	1.06275601470903	1.06733988323372	1.0184320812947	0.984946838482392
Proline, trans-4-Hydroxy- (3TMS) [MP-1.1]	1.08158998695242	1.13607074858692	1.14446132789081	1.07851197049808	1.20026343250655	1.07788623339135	1.18875683568979	1.14442057749644	1.08370887774358	1.12583162297549	1.04796984777153	1.07697631399475	1.12264552921077	1.07374439697001	1.05593383066005	1.04872274318981	1.09525925361813	1.18339976161062	1.15890485814708	1.19968413246188
2-Piperidinecarboxylic_acid_(2TMS)_375026.84_TRUE | Maleic_acid_(2TMS)_373998.81_TRUE	1.07610705904159	1.05309333264688	1.06494299365455	1.06100827447352	1.06225026581861	1.06049716881547	1.03400540867438	1.05038868182948	1.00501261984742	0.997021470763364	1.02575970537347	1.04885297359631	1.08976188306825	1.06240822554903	1.07247105082475	0.984655597226509	1.07450124868273	0.975434569738143	1.01383269686182	0.987376831499343
Valeric_acid,_3-hydroxy-3-methyl-_(1TMS)_235895.11_PRED	1.0754147071133	1.06779322154735	1.03984370852718	0.996688071321141	0.978297544911545	1.00349021673024	0.955009795140305	1.08567705317861	0.972810340909708	0.997148675151854	1.05948086494865	1.10412569204776	1.04297367535629	1.06361126351411	1.05548288617804	1.08426617930676	1.18599143856891	0.896720957537833	0.918353545093975	0.951142635964107
Hydrocaffeic_acid_(3TMS)_667708.25_TRUE	1.07312471698096	1.0635943423304	1.07991920453723	1.11209404774895	1.0575747645831	1.10497713420185	1.07159542847499	1.12437020931182	1.10375692906036	1.01458764546002	1.08569596006702	1.09858248549887	1.11569895815462	1.11807223759083	1.08300486090716	1.00721565288738	1.11608464102983	1.07018875295522	1.06136011397174	0.992415871156292
Methionine (2TMS) [MP-1.1]	1.06493159989538	1.07689917989931	1.05653804918832	1.03667935727215	1.11392272042648	1.04078021714185	1.08711577133445	1.11050962775663	1.03819934565043	1.01842685612224	1.01725917415967	1.05411381769864	1.06441283028011	1.03430248497176	1.0385124951038	0.96780720038359	1.04554233082442	1.06754373072248	1.07026900354857	1.0886005451655
Docosahexaenoic_acid,_4,7,10,13,16,19-(Z,Z,Z,Z,Z,Z)-_(1TMS)_907201.25_TRUE | Docosanoate (1TMS) [MP-1.1] | Docosanoate|Docosenoate, 13Z- (1TMS) [MP-1.1] | Docosenoate, 13Z- (1TMS) [MP-1.1]	1.05797842874072	1.0778531594619	1.07220031483072	0.981622505507797	1.00660047387626	0.953517258201094	1.06889392460825	0.983384374473168	0.993980239103809	1.08298620884966	1.05675218540899	1.0081884058107	0.95208611794871	0.938583044618827	0.999807147779554	1.06364405568529	1.07679324673635	1.09871835718174	1.00212883550525	1.03380765507603
Hexanoic_acid,_2-ethyl-_(1TMS)_254181.88_PRED	1.05750643130716	1.02979162954646	1.12196488131507	1.01208935604105	1.13497421430566	1.09074676484238	1.04501985044304	1.23434471899291	1.04800628480079	1.14057946262779	1.03323392274981	1.07342770272744	1.07151565264636	1.08189427858749	1.02935661547662	0.997766986409619	1.10034451670422	1.07375245260045	1.04368884907123	1.17204445755284
Nicotinamide (1TMS) [MP-1.1] | Nicotinamide_(1TMS)_515482.47_TRUE	1.05697920160702	1.02091301272953	1.03242949806232	1.04815994485133	1.05159849991348	1.05562400568293	1.06262666901754	0.959925382711616	1.03476241878509	1.00095044161605	1.05789771567496	1.09544034779965	1.10771181776101	1.06384276201983	1.09346133166933	0.989083292617949	1.06654419678813	0.992571310039845	1.06604650387398	0.999569239326293
2-Piperidinecarboxylic_acid_(1TMS)_357365.44_TRUE	1.05652594380083	1.10060959065444	1.08298363140918	1.07115534224849	1.07111035197637	1.06170026458604	1.09841418421292	1.04000302815693	1.0302956305603	1.04935152826784	1.05556324340106	1.08293106404106	1.09009805179579	1.07584144937738	1.06936158708066	1.03260736665885	1.09043598082812	1.06401162335974	1.07301090999933	1.02955237719757
Fumarate (2TMS) [MP-1.1] | Fumaric_acid_(2TMS)_371909.34_TRUE	1.05116602899634	1.03519292616585	1.04485271977765	1.04707790881768	1.04229111736455	1.04590686360507	1.01330159623058	1.03138571352686	0.991752465222942	0.972023443116681	1.01672229270454	1.03029575899551	1.07635914844456	1.04519278255353	1.06218629026654	0.962619116113387	1.06006709745199	0.962039301106469	1.00150069558999	0.969432156123863
Methionine_(2TMS)_474948.12_TRUE	1.04798730734944	1.06750990341551	1.04291508338002	1.02827238944214	1.1088504030264	1.02696576350651	1.08017768409242	1.090224069562	1.02630751969023	1.00905325196904	1.00495918135717	1.04458484227015	1.05002609457139	1.02396022057209	1.02840789258374	0.958403035159958	1.03339203477509	1.0568423854978	1.05752640800939	1.0732300542192
Homocysteine_(2TMS)_506276.72_PRED	1.04353441933186	1.01741494267761	1.05459649570436	1.02558396106693	1.04066702408123	1.05855113605152	1.03195649608971	0.979153676531369	1.00490431767895	0.993321250132818	0.991338041967666	1.03729987847682	1.04122000505662	1.04817663737237	1.02708989624183	0.997874885082288	1.0390096083913	1.01319642643988	0.998499304410015	1.00564230473739
Malic_acid_(3TMS)_442513.44_TRUE	1.03847623444103	1.00428630335285	1.00420519491961	1.04438289285402	0.98346589573444	1.01872276045976	0.976571197383403	0.967645893614393	0.943071986411359	0.912405895728472	0.981706668173036	1.00353521690636	1.04673879108297	1.02702782282832	1.03399554960805	0.937200654872493	1.0013395056886	0.918648286183557	0.965323405894248	0.905270683146194
Levulinic_acid,_5-amino-_(1MEOX)_(3TMS)_MP_574704.06_TRUE	1.01719101966273	0.995782848579942	0.942528482648358	1.01896113566349	0.967968561532482	1.04282242576874	1.01218472281106	0.834411187038541	0.966409651580807	0.943594242329823	1.00077861066598	1.08479545464394	1.05911232735637	1.01120216845283	1.01792895133253	0.974262394727091	0.994911053690144	0.99563802236157	0.986416696848872	0.928364570405651
Isoleucine (2TMS) [MP-1.1] | Isoleucine_(2TMS)_318827.91_TRUE	1.00952396122736	0.98070003661779	1.02391723111229	0.94281874109691	0.997799842041248	0.946174326765071	0.983489847977028	0.97258043852646	0.959146405821986	0.952965997693604	0.990216857554809	0.96574294060455	0.969036533975462	0.948457653535875	0.961442693079751	0.981602337326901	0.989640838543943	0.979626125752377	0.996466035791351	0.967876888574649
Alanine, beta- (2TMS) [MP-2.1] | Glyceraldehyde_(1MEOX)_(2TMS)_MP_277992.03_PRED	1.00562596557036	0.998953766659145	1.00232124052186	1.0188634369484	0.997782893509329	1.02946521217201	0.997404096179334	0.995792164589573	0.987257847591552	0.932921884601626	0.997664168002074	0.987753224631744	1.00293138014186	1.02204733421489	0.996589706036586	0.976721946013168	0.986531950156229	0.890536743037218	0.969433501268576	1.00129228202112
Fructose (|Psicose) (1MEOX;5TMS) [MP-1.1]	1.00395436181321	0.931963853251996	0.968425310342239	0.856824606376029	1.01382948340586	0.990629898098645	1.05211429585833	0.985948140598618	1.08186522612046	1.06933242463005	1.03798915881138	0.854611284900778	0.851025051457672	0.843072337234299	0.839621313213725	1.0815958409411	0.89455147525147	1.03973078616008	1.02894141630895	1.04550802202155
Succinate (2TMS) [MP-1.1]	0.998681879395597	1.0118705863117	0.974435397992444	1.00331192867886	0.92886404425238	0.973177119902453	0.93502368052591	0.949677014113824	0.898069647706559	0.87000382737995	0.908517158998677	1.00323424037039	1.01018501542426	0.996265943849058	1.00057855666134	0.918773392534946	0.974704197497559	0.901513846652666	0.911807533522599	0.89992501778497
Phenylalanine (2TMS) [MP-1.1] | Phenylalanine_(2TMS)_531431_TRUE	0.995738928337769	0.969624340700587	0.955730580590095	0.993638042363147	0.995805273002625	0.978745011066593	0.977628235320713	1.00671895061506	0.951046903211683	0.941707079872165	0.962413168328946	0.982837896385731	0.999044912469307	0.963194117652563	0.991312658249919	0.919867517926098	0.981163903608852	0.981595877184827	0.966381990142304	0.969309486341346
Arabitol_(5TMS)_503104.56_PRED | Ribitol_(5TMS)_503667.69_PRED	0.993282685578365	0.982311848702873	0.989939243970042	0.995497424565559	0.978923859400537	1.0133984786395	0.974238461207225	0.890325553283194	0.954518041808351	0.936072790033154	0.948790388702433	0.999639663103202	1.00389679318398	1.01192318718311	0.995758201725431	0.950162609875445	0.995981482934206	0.966025854465574	0.953273356145886	0.93314159741871
Nicotianamine_(4TMS)_902113.62_PRED	0.992519492548938	1.00622641725668	0.99922625315938	0.90647139008229	0.93283870239285	0.88014130053949	0.997677516649082	0.902494185024012	0.924489402899889	1.02074000084385	0.995258772847109	0.937782338868194	0.870546747542536	0.876852423769694	0.920653279570568	1.00715215169741	1.0109286019984	1.0376279505937	0.930174698872402	0.953819525030041
2-Piperidinecarboxylic_acid_(1MEOX)_(2TMS)_549118.94_TRUE	0.984335253907352	0.955191013486519	1.02587729750847	1.08030056674102	1.02404601780116	1.00132989662976	0.97537603978612	1.07473430654811	0.995095682321051	0.978458709359878	0.935746590647735	0.95669588590822	0.983276104178221	0.991662522682422	1.04378963751665	0.945835212892032	0.983483981882794	0.961981875721428	0.931810979771025	1.03819361102503
Tyrosine (3TMS) [MP-1.1] | Tyrosine_(3TMS)_659029.31_TRUE	0.981684561527677	0.959383270834112	0.98670804702742	1.07378193762247	0.946564113494838	0.991317915762492	0.887158280448488	1.01591629379646	0.985898653912448	0.921855281709729	0.983083231135616	1.00108101069039	0.999732630424039	1.01932039499292	1.01260441966036	0.995593161511249	1.02601668837085	1.00016486061729	0.947375150667542	0.877995708123998
Docosanoic_acid_(1TMS)_904290.44_TRUE	0.97653292176961	1	0.993091379021009	0.907478556504779	0.942761357254951	0.881677740035303	0.989757034107465	0.909750367141228	0.922195870444979	1.00679179803739	0.987183286019723	0.937284427182052	0.878082749993516	0.872611751408177	0.928272918987942	0.995483669538194	1.00340490614245	1.02728138667075	0.922968651497559	0.945958023905271
Hexadecenoic_acid_methyl_ester,_9-(Z)-,_n-_652277.12_PRED	0.974020273650997	0.962297687464375	0.96269725056979	0.973251334943674	0.94847931797762	0.944638434475384	0.972926440072674	0.886342570069346	0.948335149175462	0.956123896267959	0.94899639410726	0.993789893854136	1.00026736957596	0.973743159110475	0.957980238264086	0.944054770311703	0.974367991991912	0.971433265977965	0.938970365262752	0.911599805059961
Butanoic_acid,_3-hydroxy-_(2TMS)_249401.72_PRED | Butyrate, 3-Hydroxy- [MP-1.1]	0.971830488930769	0.978433364739609	0.941552589964306	0.905066533868605	0.937908831919969	0.915335272918149	0.909102466589086	0.924376534609023	0.879280468944553	0.875524885394802	0.930649588627041	0.907741016976752	0.972477795344825	0.889478619090082	0.885056627355096	0.956656003866451	0.877108390484668	0.900578405017213	0.914603196031965	0.913530091566881
Cysteine,_S-methyl-,_DL-_(1TMS)_354018_PRED	0.958924695810339	0.997393639645878	0.978362315627389	0.969805489620253	0.965812743881596	0.959695930183513	0.995010661412801	0.917614137959194	0.93408022029881	0.936925845967777	0.962144897691944	0.987703478387817	0.9949080350404	0.974997649688432	0.968228129300429	0.936142001947742	0.981578438994509	0.972026615789262	0.976137307490146	0.920117860272698
Arabinose_(1MEOX)_(4TMS)_MP_498992.12_TRUE | Lyxose_(1MEOX)_(4TMS)_MP_498323.69_TRUE | Ribose_(1MEOX)_(4TMS)_BP_501489.22_TRUE | Xylose_(1MEOX)_(4TMS)_BP_500236.69_PRED	0.956800633303019	0.944250958830881	0.99669057570639	0.871153283638478	0.949135525993891	0.858108074430539	0.943962549937164	0.930105704133022	0.973802401319358	0.963204145282163	0.948704474255342	0.935964338814148	0.908355967504537	0.89640164931009	0.930523533160059	0.954212451938329	0.966589064404728	0.946957111542851	0.919079410568702	0.914762491758593
Cysteine_(3TMS)_479326.28_TRUE | Pyruvate (1MEOX;1TMS) [MP-1.1] | Pyruvic_acid_(1MEOX)_(1TMS)_222801.88_TRUE	0.946129673611702	0.857756327786197	0.882767544719859	1.05823562472983	0.917413630659617	0.986011811327414	1.00576108370251	0.885758638252876	0.901447351150444	0.891929057048843	0.949817756157264	0.94450976734823	0.966591723788917	0.913929271375874	1.08002668398563	0.900082732079808	0.968527309730607	0.955192130455337	0.965895591287981	0.932856462952671
Heptanoic_acid,_n-_(1TMS)_255612.95_PRED	0.945876051344339	0.91785527839001	1.00645644830305	0.894566315051584	1.02206019599079	0.973640589391159	0.930873029197122	1.10811386107686	0.917182393461865	1.02615058737068	0.927499259058811	0.956454526985527	0.961546489418298	0.968517928740241	0.916379353885943	0.896349573831472	0.995559783348582	0.970475539411679	0.940458736696192	1.05333378040412
Galactopyranoside,_1-O-methyl-,_beta-_(4TMS)_598177.19_TRUE | Isocitrate (4TMS) [MP-1.1]	0.944431437496285	0.852928562147307	0.978880525799065	0.859616680022012	0.98285617194186	0.938091098079323	0.813548353273423	1.04165098662346	0.994814330517034	0.930164936024024	0.909069492290196	0.780176373883384	0.796233536544488	0.865050425338012	0.715649198123002	1.1021152603399	0.938743719033784	0.998826653380046	0.934192774730897	1.03923198085906
Butanoic_acid,_2-amino-_(2TMS)_249223.84_TRUE	0.938190807514582	0.9580606202269	0.913270199156459	0.909836495213648	0.978791198069539	0.926918572908226	0.947416201549254	0.880031359498534	0.883994644530312	0.851018946067994	0.899056430140065	0.905686386176773	0.908766793219215	0.900154827920501	0.913124685364281	0.893845200612569	0.923084284649796	0.909016741043427	0.935441653814886	0.936302716406662
Isomaltose_(1MEOX)_(8TMS)_BP_915618.31_PRED | Melibiose_(1MEOX)_(8TMS)_MP_914184.5_PRED	0.934719481764848	0.895162223232407	0.842411455052563	0.866010007877682	0.83740200038986	NA	0.916810939246788	0.591053853860324	0.866685903442842	0.883087595205352	0.918322614563317	0.960666279897637	0.950121520519053	0.848634451606944	0.85227826172031	0.807650584361531	0.871577266102974	0.898431205658891	0.845463101097168	0.837469437295017
Glycine (2TMS) [MP-2.1] | Glycine_(2TMS)_226792.3_TRUE	0.923698748815315	0.700517349339343	0.891963976877721	0.810635460622525	1.21036523807116	1.1963445588611	0.998079638765829	1.23882066779434	0.694681870641278	1.16453709582199	0.783990770891496	1.22792961341269	0.86808053179043	1.02843399753377	1.16030718344815	1.34156814119548	1.37174820204089	1.31299321185579	1.29330204508846	0.820282192066084
Pimelic_acid,_2,6-diamino-_(4TMS)_654293.81_TRUE	0.921187224088856	0.887740161570982	0.887109116575034	0.915944709295886	0.885210019049937	0.886086083952866	0.920204797677211	0.864313015514323	0.883214071999728	0.885059094897984	0.899969872906322	0.940915372134783	0.936626324517	0.90105926319252	0.910310310772534	0.879935128152735	0.908447559550521	0.92133296929491	0.882469755109048	0.854104548273337
Lysine_(3TMS)_631402.94_PRED	0.920201460451668	0.94496501382136	0.867017803773608	1.0111905207465	0.944441375568889	0.962812383335599	0.952409941401061	0.858026217397038	0.869480889120633	0.856645566318555	0.890714083661521	0.950592643252813	0.956841594507778	0.966061239071657	1.00659284539053	0.858050360157392	0.912664906048352	0.913476045192627	0.93536006360613	0.923589543257146
Glycolic_acid_(2TMS)_204397.8_TRUE	0.918736608774003	0.920617312222752	0.902609862892952	0.880022284510067	0.885604726296002	0.880019395501043	0.880771629542945	0.854955715913022	0.862101168847174	0.838391762310997	0.907161355603158	0.867931701256543	0.904731228503416	0.879088523487485	0.902259524738189	0.873985521957277	0.920496552476837	0.869104297311738	0.909226491587432	0.856958312560331
Fructose (|Sorbose) (1MEOX;5TMS) [MP-1.2]	0.91369753604669	0.852793871950748	0.887886767324457	0.787180520773425	0.937013637439799	0.906873776569	0.96705562804415	0.901328662165772	1.00646179517453	0.988499273021244	0.960126302494578	0.771484962028065	0.767665536377378	0.756286387130508	0.76869607570054	1.01541450315818	0.812609874165632	0.959024656030394	0.948411250247299	0.975735822926729
Mannopyranoside,_1-O-methyl-,_alpha-_(4TMS)_559825.75_TRUE	0.911679603423571	0.952421322364132	0.92189368118639	0.958840557097306	0.92750962000086	0.931424418004632	0.944041839570823	0.920218554853685	0.908239985392703	0.899276150669143	0.907116706638063	0.908718024136725	0.937831521873513	0.933803358562234	0.945495316578091	0.834361446769385	0.911561882199779	0.888920775691081	0.920049540255179	0.92691265635439
Pentadecane,_n-_462471.41_PRED	0.905932003345958	0.944945490825456	0.897386565022732	0.970489982295031	0.897068455621867	0.929352996631204	0.913560922524693	0.806767407879779	0.885270800592399	0.893106609536407	0.927302732927578	0.971656997292311	0.947764468600378	0.937275443579907	0.953001756999118	0.852800034063652	0.938044481818573	0.911262401426644	0.904530570224738	0.870547234543552
Fucose|Epifucose (1MEOX;4TMS) [MP-1.1] | Rhamnose_(1MEOX)_(4TMS)_MP_517543.41_PRED | Fucose_(1MEOX)_(4TMS)_MP_522432.03_TRUE	0.900785091891627	0.89787965988363	0.859272722036889	0.833711289652184	0.878012177245257	0.822963376249082	0.898672235344444	0.834127236904158	0.882936201150307	0.895406845359066	0.887967465742679	0.893283837928334	0.887170068786775	0.840515941858889	0.873542658212797	0.859958126610233	0.913760525410521	0.881159653608511	0.848790542167573	0.850212783946552
Ornithine-1,5-lactam_ (2TMS)	0.898967501372103	0.852726486564927	0.845468014784309	0.841841810466491	0.805395772569384	0.790194929618344	0.877440148985317	0.643834975851489	0.893297101198065	0.839649301581553	0.892902128112034	0.928791223544193	0.912618659716613	0.838441531117477	0.81790638707085	0.794931421495631	0.808809510206918	0.819710633839268	0.77450073556253	0.786808429198157
Pyrophosphate [MP-1.1] | Pyrophosphate_(4TMS)_556794.69_TRUE	0.898545194689413	0.999045925523601	0.885507348828264	0.946510464867637	0.91798454621419	0.904329758748157	0.946246817979267	0.799669737186548	0.899012335231607	0.889178727500213	0.940865880900608	0.870626421292603	0.967329039241509	0.921768353421302	0.917508355396723	0.718567339754986	0.840047675715441	0.833180883248448	0.923717499320694	0.926478593828202
Asparagine_(4TMS)_BP2_626664.06_TRUE	0.893971929034654	0.91218009211092	0.857385726862123	0.95563562882423	0.906271295377072	0.951546602517826	0.919425926106657	0.843064017067476	0.838832510671275	0.849532303223631	0.868542193866885	0.926141434563561	0.937045468246367	0.946649910028812	0.951407709537204	0.84572739845226	0.900277888204016	0.90106100296752	0.915809380397079	0.901053660693623
similar_to_NA_(Hexopyranose_like)_623755.44_PRED	0.893012694303532	0.899956334361875	0.83521931195008	0.953609286144824	0.894188524679176	0.944610878405765	0.920706846671426	0.836035176662875	0.816255797658596	0.837547982331277	0.860606156720934	0.916534519845081	0.930385461171865	0.933333275087534	0.965353342894727	0.835818853492304	0.886955130577373	0.887782595114738	0.923519622058489	0.897972520434259
Hypoxanthine_(2TMS)_659841.12_TRUE	0.892370087956143	0.834470060359938	0.890129089951295	0.874139695084635	0.877702662268336	0.806975975186464	0.812027517150779	0.800100224643155	0.833898806187599	0.786048588905254	0.835439304813067	0.934587270099006	0.897418293918415	0.854012838446492	0.919481252201044	0.808244118713062	0.858718811469177	0.78912606250148	0.815472782834865	0.78196095185535
Calystegine_B2_(1MEOX)_(3TMS)_BP_620736.44_PRED	0.892223690878099	0.888259803926535	0.837223985378136	0.951572272086244	0.899598033247271	0.940057036918042	0.899450310854231	0.818701151170275	0.819262706461507	0.846837688326246	0.860845314659138	0.907468573010329	0.926779740090502	0.921165557733902	0.958099727469024	0.821180175002347	0.882317412369932	0.884884370242644	0.910163434074541	0.882665915823851
Glucopyranose_[-H20]_(4TMS)_561007.94_TRUE | Glucosyl	0.890811620956776	0.90189447422685	0.864973115956712	0.927567916713518	0.91968584449064	0.938748998617022	0.90514823195219	0.87648208715161	0.84391119728374	0.830370795326916	0.833677088152651	0.907713793269732	0.90169858295888	0.920512022243803	0.951354296817889	0.869284561914597	0.928988559789187	0.885606186474414	0.898971370132495	0.862554270702225
Glucuronate (1MEOX;5TMS) [MP-1.1]	0.883594708142487	0.891465153258701	0.866658751291988	0.894608100001084	0.874926289080165	0.866826512726154	0.898542203301305	0.853304725675125	0.870520283763552	0.844584662952634	0.86371682966954	0.882829650159779	0.882861937687057	0.893507413479384	0.89369974278523	0.835704289710975	0.888860559054213	0.859294593380692	0.869211717093609	0.869637620427731
Guanosine-5-monophosphate_(6TMS)_1065235.12_TRUE	0.882976201783721	0.496979239670685	0.887250771337016	0.941349798837724	0.87845825895089	0.96744020794054	0.717506640338804	0.83923941426265	0.864267965742698	0.874853302414057	0.851209011943327	0.996450919197266	0.878930206317085	0.905081517769344	0.920566760074333	0.867644014568326	0.905517201679403	0.869243520516299	0.789187895375919	0.887559157680704
Histidine (4TMS) [MP-3.1]	0.881388420970859	0.92383341579939	0.861509926378962	0.875765133058091	0.748976454185422	0.752869176197097	0.859674816415459	0.686465001959218	0.900745583316638	0.794194804769354	0.878631539682415	0.797567842933145	0.899913345103319	0.851623779079729	0.810313082838327	0.674875862592108	0.705582223542916	0.676045113696261	0.698094326364929	0.827311053777028
Isocitric_acid_(4TMS)_597989.19_TRUE	0.880258350544187	0.691486254448744	0.918802680351966	0.758162468722563	0.895835768055301	0.855725736861329	0.560354168778793	0.970675819772999	0.884821523132828	0.761086691790484	0.699234920692939	0.628428769220667	0.653981081162594	0.756352865613179	0.513915997983544	1.00637534475314	0.884277432388661	0.906710795485895	0.676748969640193	0.919398418932871
Propane-1,3-diol,_2-amino-2-methyl-_(3TMS)_305353.78_TRUE	0.8738677590173	0.835275353274376	0.874388562431132	0.83392334085097	0.878903169718846	0.827764061699143	0.852566742803219	0.845480036072421	0.835896826780453	0.8305475063897	0.87626352099269	0.857498634214633	0.883855801722918	0.838280861108347	0.850434691373723	0.82799055184056	0.896112077154328	0.886915689030738	0.856020717000685	0.825491350531468
Galactonic_acid-1,4-lactone_(4TMS)_619566.38_PRED	0.870259393989971	0.880134671827837	0.850853123380037	0.878484922933313	0.863379821272234	0.850273689866222	0.873829935543832	0.848192293951513	0.847651147896124	0.840731378816392	NA	0.867198444778465	0.874285994423609	0.873876212236702	0.87642922271155	0.821724400977769	0.87924643950621	0.846020315862361	0.860520018688383	0.85246070298922
Glutamine ([-H2O]2TMS) [NN-3.1]	0.868408216408387	0.801558365243017	0.839299174808539	0.835998979865705	0.820521182148111	0.834260224176223	0.784934259602725	0.89104964757512	0.861698887535164	0.740275965592286	0.848939396239785	0.794412187977248	0.826999548458334	0.861430481771993	0.80045149523685	0.842542859991861	0.826587912018682	0.81296088565441	0.813889197411961	0.841400696176185
Ascorbic_acid_(4TMS)_652392.44_TRUE	0.865884264627895	0.83388711001286	0.857848921945333	0.857061298218173	0.84793926403812	0.850710678254524	0.862409698028849	0.79001695458555	0.842946637189845	0.849453682143408	0.828160055235119	0.86733836980174	0.882276487229854	0.860906714704021	0.848501122265804	0.839291830538147	0.864820595707614	0.86819629081476	0.82374214187138	0.819243179556445
Histamine_(3TMS)_653726.19_TRUE	0.864953650855361	0.834207041504522	0.84264145561555	0.852990200853153	0.827744821061571	0.842968581563416	0.86334358921653	0.841503119845813	0.826654625609668	0.822724184236231	0.853634338741971	0.894411256353881	0.890614807114311	0.850695495634143	0.847026653697141	0.831326498436828	0.845361680614307	0.861064896664266	0.823659073891721	0.796489459921398
Tetradecan-1-ol,_n-_(1TMS)_592555.94_PRED	0.863843851497487	0.766976599847788	0.862576732107656	0.882964626740623	1.0229683837298	0.993365040620303	1.04352913407048	1.00174187468624	1.17386983316379	1.16740990431268	1.1273625400094	0.820577178616953	0.800284901850152	0.881201731539276	0.819061859944968	1.28709699169334	0.820367262358748	1.14145387091563	1.22866360866165	1.22201332705128
Glucose,_2-amino-2-deoxy-_(5TMS)_BP_620384.06_TRUE | Calystegine_B1_(1MEOX)_(TMS)_623873.94_PRED	0.863181353914789	0.875383741303937	0.789588567473635	0.929283701836988	0.871676204299458	0.909821711025355	0.890876347462783	0.796626846202134	0.791626052719991	0.802058540231429	0.827018509785232	0.894144947187942	0.902675205030868	0.91063845110315	0.934138616261135	0.808426290439913	0.858131835671902	0.860550639899211	0.886503132466945	0.861600553855911
Heptacosanoic_acid,_n-_(1TMS)_1053682.38_PRED	0.857385634235571	0.756616696526166	0.849091648976523	0.948490922639885	0.830541130974603	0.947614979364645	0.73022512119086	0.852857602048733	0.824900570446251	0.860438697894403	0.806788362027314	0.960155619588621	0.88582546620157	0.887856556007063	0.903300647737987	0.869960499804544	0.889022851118125	0.849140193146585	NA	0.87980121502652
Glucose (1MEOX;5TMS) [MP-1.2]	0.853837338529621	0.835219294431957	0.881929652070854	0.827533546928922	0.917304666468582	0.880465944115186	0.871491260185755	0.948820652743881	1.00568490124808	0.987659101555996	0.961559444673936	0.776166256937318	0.774305940768579	0.806569927074791	0.731441536031407	1.12475438082281	0.832274220610641	0.999835139382707	1.03245524361423	1.05515415902108
Agmatine_[-NH3]_(3TMS)_578698.75_PRED	0.852500756973926	0.848978279861396	0.791831759639278	0.849118930131668	0.794730899874369	0.803662522763011	0.834841938317541	0.726646994672686	0.788197575772772	0.777412750595311	0.839624725189143	0.8943816881407	0.857260675886456	0.83125961065192	0.845920380244044	0.791924351555406	0.858881486361038	0.807672901929276	0.804694663445275	0.71651599914023
Hexacosane,_n-_908082.69_PRED	0.850362076298445	0.873978080911678	0.861097834959764	0.796536476005731	0.806499628125427	0.776829693257193	0.864304225010956	0.767442341653015	0.785200863614621	0.880637940731649	0.864682029136394	0.801137970732336	0.744496758427406	0.759251371672569	0.808784761007926	0.868605677001149	0.878296443653387	0.899551454357241	0.809131506915944	0.814945819126791
Cellobiose,_D-_(1MEOX)_(8TMS)_MP_862370.81_PRED | Lactitol_(9TMS)_862430.56_PRED	0.847735447236393	0.84385362449572	0.856073556983042	0.822968882025417	0.819796125602613	0.789004194527086	0.857261188054566	0.72755375831729	0.834816169880436	0.830679914125132	0.850094237107617	0.838510740929117	0.841686307382389	0.820954287492633	0.832533082559841	0.78932187427764	0.813170221255433	0.81519429161651	0.808492220672449	0.826421486346592
Fructose,_D-_(5TMS)_622992.38_PRED	0.846193368591685	0.856788588780431	0.78539789970975	0.911333211226052	0.83727096536724	0.892618733012588	0.846178171234685	0.766821509416495	0.777700933811338	0.786511992747447	0.806494281805236	0.870077314772179	0.88137698989686	0.885588233566575	0.913645435301318	0.784567361250128	0.845855513685439	0.846826280134954	0.867146471800997	0.843510083961691
Trehalose, alpha,alpha- (8TMS) [MP-1.1]	0.844949229406425	0.87743415489641	0.864367047190741	0.819765425511706	0.85477461742781	0.807039052384966	0.866555977812476	0.794421090481464	0.819188200309603	0.871865028379422	0.849068127013934	0.87120780687236	0.823866143811279	0.806911359965282	0.879516682525742	0.788909666847593	0.874321888796217	0.882155277812778	0.838588993804331	0.827807177241722
Allose_(1MEOX)_(5TMS)_BP_588062.44_PRED | Altrose_(1MEOX)_(5TMS)_BP_593442.75_PRED | Altrose_(1MEOX)_(5TMS)_MP_590452.62_PRED | Galactose_(1MEOX)_(5TMS)_BP_588777.81_PRED | Galactose_(1MEOX)_(5TMS)_MP_587519.31_PRED | Glucose (1MEOX;5TMS) [MP-1.1] | Glucose,_3-deoxy-,_D-_(1MEOX)_(4TMS)_589111.5_PRED | Glucose_(1MEOX)_(5TMS)_MP_591351.81_TRUE | Gulose_(1MEOX)_(5TMS)_BP_593076.44_TRUE | Idose_(1MEO…	0.84420605233418	0.724132213427516	0.845784222241967	0.873332774664975	1.0308187037277	0.985150342952014	1.04109602906862	1.00012610955612	1.18035425911842	1.17749730082903	1.14004195159804	0.788366458187712	0.771190708176872	0.867150729167465	0.801143772268682	1.30539668284561	0.795892853209813	1.15317388333691	1.24520844052946	1.2352447732188
Homoserine_(2TMS)_380616.94_PRED	0.844127627820325	1.74519590986551	0.849754333436744	0.815721572751828	0.938486980723802	0.861958966118804	0.802368909283898	0.991144266967099	0.798993465370549	0.954046145095044	0.851494409093762	0.941490582724309	0.785389147627117	0.815546271047727	0.79131174178651	0.839441086495671	0.821229623357395	0.949405303791122	0.790167885214024	0.83679966671819
Tridecanoic_acid_586610.62_PRED	0.842828204974734	0.721917489033701	0.835267316840621	0.842273880411998	0.992707592316247	0.962911151170576	1.01628684001972	0.971860391481967	1.14791374194516	1.13545441862903	1.10483730987316	0.775858360406241	0.770230608972981	0.838762396326797	0.78698969135234	1.26552501494199	0.784143079762883	1.11751608679643	1.20356870628158	1.19658781793577
Threose_(1MEOX)_(3TMS)_MP_432507.62_PRED	0.842392776756051	0.805369898321486	0.838311889327356	0.885700634453603	0.84583372400101	0.886242780690038	0.906344353479089	0.763156229713179	0.857915633769631	0.87329808320341	0.839282969919469	0.912831928866912	0.883684879225859	0.885437888212859	0.907209667971235	0.829667458601872	0.899595151745074	0.863502673930632	0.856628122231368	0.797126906234286
Glucopyranoside,_1-O-methyl-,_alpha-_(4TMS)_613929.06_TRUE	0.842035659432754	0.854119255690507	0.831873946347552	0.877304929643996	0.810025475040903	0.850079103336426	0.787127011532612	0.827099153180965	0.784879801986649	0.812792395817829	0.823392678136682	0.799389419308194	0.830738405773056	0.842211581048713	0.791947537134441	0.800202001965526	0.854029825782187	0.79707864677865	0.766159195019231	0.848749535894412
Indole-3-acetaldehyde_(1MEOX)_(1TMS)_BP_657093_PRED	0.84067952090898	0.805035052457054	0.813815072475153	0.835520012659835	0.805395772569384	0.810657160357522	0.827604157561378	0.71538986190759	0.803276854787986	0.810611620103864	0.821682087871269	0.855366226736126	0.851275787662086	0.849799337218931	0.824874451172402	0.817617026795013	0.834214748652747	0.834839659048057	0.802475893977476	0.785859042241434
similar_to_Diethanolamine_(2TMS)_335362.44_PRED	0.836953002474084	0.844066589237819	0.849047378422124	0.856402973317874	0.844163820904003	0.81629904174863	0.844461265881461	0.891667966315749	0.824251493203153	0.788638269338278	0.812356006709138	0.851902351411242	0.838148574064637	0.828594566212111	0.857554517199166	0.795674202038016	0.821638675464976	0.83660973672157	0.847225050610334	0.862005817403518
Glucose,_2-amino-2-deoxy-_(5TMS)_MP_600525.75_TRUE	0.835719381284909	0.686422644979055	0.866138783197185	0.715848532040831	0.858207520463849	0.817487722621449	0.578773040039093	0.911507658707249	0.84083713307442	0.742791081531719	0.689004023929633	0.588924940191236	0.631530734596362	0.712796782296082	0.509316611912091	0.962280576430591	0.828204858897328	0.858737208546808	0.680823810895308	0.879957309359816
Ornithine (4TMS) [MP-1.1] | Ornithine_(4TMS)_572079.81_PRED	0.834808819356675	0.870768136225742	0.930570020571278	0.798540676493679	0.889148506190875	0.789355297293356	0.861859809321741	0.911599669384024	0.902123640274749	0.858887491422808	0.861471397548404	0.776043168813134	0.785827119052768	0.820909582196253	0.767276156459422	0.841589373048806	0.885414607509106	0.872070426047587	0.833638414439328	0.832414786748181
Serine (4TMS) | Serine_(4TMS)_459464.91_TRUE	0.832341719813523	0.837686874323539	0.802043736207509	0.874777661074471	0.806604383254421	0.842612578935385	0.813937199476609	0.712179348532613	0.786114741800501	0.800632580321284	0.8353691899841	0.87491991902044	0.856372836724625	0.847195064807757	0.87166720791193	0.761999014080394	0.844582625648296	0.821282144282561	0.82156796811907	0.770939690072377
Arginine_[-NH3]_(2TMS)_582688.25_PRED	0.831327487934056	0.841798982695182	0.810240321013658	0.812682028272114	0.767890447161767	0.72945164877352	0.818785865335101	0.673997515293022	0.846928820743178	0.75233807403898	0.81820466956936	0.796486642754465	0.845365280729744	0.795352631430382	0.775988857964545	0.675518413431415	0.709445889313156	0.681268711371231	0.707334443020415	0.812832859416531
Glucose-6-phosphate,_2-amino-2-deoxy-_(1MEOX)_(6TMS)_MP_785377.12_TRUE | myo-Inositol-1-phosphate_(7TMS)_788938.62_PRED	0.829922646271393	0.817853947654243	0.79617127617325	0.794969032775321	0.768481590616969	0.794398674211962	0.801627318095359	0.781059491325686	0.815457283205621	0.749387004833704	0.807039998461968	0.764032370783612	0.805072293174521	0.786815516680451	0.757570560270188	0.778343493462098	0.783679775446276	0.741159350438979	0.7675310949699	0.772271284963521
Docosan-1-ol,_n-_(1TMS)_890459.25_PRED	0.824754844072745	0.794905485653304	0.849974657886065	0.808102756849876	0.858824282730275	0.845189016241447	0.813245290824499	0.930395661351798	0.842300437936842	0.822677853757946	0.777312243046202	0.784264871665392	0.828639900278948	0.838361215929145	0.795136557614286	0.778398700435115	0.828831542481739	0.823726630364527	0.78166349591022	0.857017877758857
Xylose (1MEOX;4TMS) [MP-1.1]	0.822936124323229	0.836095419780162	0.824979897954376	0.861238591884966	0.848267184417681	0.862049575105486	0.848545579850872	0.80164142410761	0.813733004523519	0.77875281139816	0.79983907642458	0.849147164814998	0.854418717990224	0.847726846613371	0.875021390685347	0.799528758878208	0.80496379621304	0.863358204351953	0.857400848750639	0.83303349144996
Pyruvic_acid_(2TMS)_209817.64_TRUE	0.821951886313566	0.830231069096465	0.803321743749071	0.779552187178605	0.78092999201887	0.780717048939651	0.781459275898205	0.743132685636237	0.758491855346654	0.755935912394912	0.823468278763407	0.775858360406241	0.807714685566636	0.782627756975623	0.818650159854096	0.782215344099574	0.835758222253553	0.775106426175573	0.811528364109252	0.750436725040513
Melibiose (1MEOX;8TMS) [MP-1.2]	0.820419132000201	0.794572996357207	0.773761065116559	0.729815700272646	0.744579578126484	0.725068931864886	0.795717534481754	0.59517536387297	0.787792136314184	0.798174072460056	0.837251518339933	0.861499559960708	0.829549401710024	0.766342169697895	0.737341727946624	0.781945807480834	0.791037893658675	0.801822957625447	0.742054762823896	0.724518322012707
Adenine (2TMS) [MP-1.1] | Adenine_(2TMS)_679386.88_TRUE	0.819920172525864	0.836948527223126	0.814954176695621	0.817538630716646	0.775356073078547	0.796494931185834	0.798154008998771	0.782204111996156	0.822909174512531	0.784767395678714	0.777160597003828	0.806170607099404	0.831777576244085	0.820102781003074	0.819226240251486	0.758400745033746	0.822940795205251	0.770246797245539	0.781717764884978	0.790200476836224
Uracil (2TMS) [MP-1.1] | Uracil_(2TMS)_392037.44_TRUE	0.818460003231456	0.804789076360404	0.808845237323055	0.811192997366607	0.791269985858308	0.76434584501218	0.754381464944331	0.795571490668926	0.767051774793975	0.71336395022947	0.76132681064268	0.825364274208389	0.822226544803743	0.802916017240495	0.834148396139406	0.726853907472741	0.790445473024599	0.717541778252228	0.764290948204132	0.778397927435592
Galactopyranoside,_1-O-methyl-,_alpha-_(4TMS)_585464.62_TRUE	0.81381174292463	0.733498427876687	0.798031941857817	0.825761129760297	0.939899936106117	0.912350575047564	0.963741872988697	0.923862062629986	1.09276319184632	1.08182724326921	1.05594012116753	0.773873787838727	0.768918471049784	0.82614516646403	0.77337569523705	1.2077687762424	0.759078100186261	1.06680472514375	1.14905488033678	1.14001011030091
Dodecane_260776.19_PRED	0.802796998992565	0.747663704691014	0.84287114674677	0.737362423959142	0.866276586758055	0.827986595214095	0.777051803959501	0.951965172659615	0.772784110072842	0.864898429888581	0.776501787168294	0.807594605827523	0.810690494212889	0.812937809580428	0.779565648702809	0.75251690891393	0.842690398308622	0.826729092936908	0.791753805841165	0.886736722253487
Gulose_(1MEOX)_(5TMS)_MP_584150.19_TRUE	0.801633614969406	0.829536665535428	0.818167497246111	0.796079264851495	0.801015292060785	0.785236172341966	0.810404589278329	0.813832149375947	0.814232990257791	0.792586649105942	0.784571058659914	0.779092551371147	0.793515096546262	0.779429132105807	0.764571683212862	0.749090200239412	0.787299486851637	0.751001451279709	0.758234339796868	0.818683931302641
Aconitic_acid,_trans-_(3TMS)_600462.25_PRED	0.798300673095379	0.668054694591524	0.825336380036042	0.701463308647061	0.815130638994476	0.796964642034482	0.588690637614083	0.884798966247403	0.819411617518837	0.73361312571639	0.696234196374984	0.60971019582322	0.646493532116678	0.713490084209974	0.51476368229625	0.934327634718614	0.808676871674229	0.836695567939059	0.718919420654201	0.856271802102286
Dodecanoate (1TMS) [MP-1.1] | Fucose_(1MEOX)_(4TMS)_BP_528624.81_TRUE	0.796372908396302	0.777107251330236	0.785783148595483	0.76909426544747	0.790523189424574	0.744722058117149	0.79961783641956	0.789561370927433	0.790963752690376	0.790624409816013	0.784232814968559	0.788879010835617	0.787876079070289	0.760487224131326	0.78749253129773	0.760582047185543	0.807567338471961	0.823493248885921	0.783659065134304	0.781449869480839
Norvaline,_DL-_(2TMS)_302242.12_PRED	0.786101862882086	0.77671136267055	0.817902018430241	0.764855001242584	0.788787150417115	0.769405014807987	0.778498350114384	0.754261716635801	0.7799397589531	0.762164779137356	0.81117633165237	0.791305650894701	0.817206019592564	0.756020201470838	0.776042842170482	0.760272297201233	0.824513835063746	0.811756468482822	0.790681224056093	0.753866785568441
Gluconic_acid-1,5-lactone_(4TMS)_625723_PRED	0.78226458218583	0.787459965743932	0.716397922439556	0.847287935072431	0.777918055691662	0.834153116935998	0.796294025361389	0.721642386656822	0.706561142205746	0.723462419456869	0.749860747800223	0.80349222987813	0.815705479990209	0.824053547134443	0.856584620012608	0.724998339149574	0.77456298575769	0.781358022134911	0.804975668074552	0.771631454051501
Isocaproic_acid,_2-oxo-_(1MEOX)_(1TMS)_BP_289992.41_PRED	0.779964895162667	0.735364944871883	0.809292905602055	0.742047631517465	0.718162336957254	0.712188875451519	0.725604939375901	0.762944490328052	0.762801280401401	0.786280455445888	0.788386430912969	0.774682966312976	0.744496758427406	0.714696304844239	0.757327714223127	0.763342413725683	0.754642891667724	0.769983294987161	0.723465890905321	0.690272689794711
Caproic_acid,_2-oxo-_(1MEOX)_(1TMS)_326540.84_PRED	0.778686251070177	0.778106037101737	0.753316237117665	0.748552671363762	0.714415479474518	0.685752152760147	0.76860953032587	0.670650511528988	0.770595256596188	0.733693115964364	0.833677088152651	0.754398627207239	0.782162052957572	0.7296928365073	0.758477924989133	0.717183230501325	0.708631457955063	0.688788693166436	0.710525339014689	0.747049797277036
Mannose-1-phosphate_(6TMS)_785522.56_PRED	0.77833580095473	0.756676207624478	0.738665215360651	0.740661460645725	0.72448391099208	0.736347944470922	0.746624686492093	0.746300911442102	0.773769488133882	0.711908046653644	0.755349460664645	0.706372003353456	0.759350551585235	0.745070650720511	0.718004148502627	0.730349768420987	0.73426817032808	0.695748678211031	0.71712883442134	0.730092234596418
Butyric_acid,_2,4-diamino-,_DL-_(3TMS)_438050.91_PRED	0.774430837784465	0.742080906363199	0.733778326196011	0.773883237462497	0.707323425046981	0.743339930292835	0.710765141760246	0.711756288567459	0.682648105441244	0.660175056340116	0.721180641912596	0.746683764283891	0.785514402897086	0.748035292520386	0.776150755311567	0.693466204210547	0.734337933827963	0.69077792751548	0.715400384986394	0.64175858743822
Calystegine_B4_(1MEOX)_(4TMS)_622338.06_PRED	0.774311048683952	0.777107251330236	0.711811032421695	0.842129983874235	0.776297882095519	0.823421164079801	0.790437658120565	0.703077040122156	0.707077883694937	0.711358713903126	0.754535223828987	0.803388322261545	0.82001433976539	0.820506681270608	0.848876113320553	0.715125161077749	0.768905744608545	0.78511128770827	0.808079872787163	0.76637297751076
Glutaric_acid,_2-hydroxy-_(3TMS)_488906.25_TRUE	0.761740394770358	0.71660888207228	0.718978264635054	0.72918516189826	0.748091367091569	0.733329119464796	0.734790345957835	0.681515276128542	0.731484987226145	0.695275436936573	0.701041193706492	0.745943540403425	0.73975381301137	0.716234145622636	0.710504903020158	0.728687623649077	0.720971502895852	0.753220669646147	0.730161048046704	0.704196406430288
Maleamic_acid,_N-ethyl-_(2TMS)_459686.66_TRUE	0.754941393068353	0.773483476888019	0.728388749083205	0.82390493753198	0.719130121432673	0.780421228874959	0.758880457167722	0.627162520858035	0.726714973220148	0.740889262477857	0.794986274283448	0.825545587174633	0.788184284608738	0.793828549886788	0.822277140520078	0.708350356135628	0.78638938204641	0.772663224874154	0.752980715239583	0.708044767524276
Guanosine_(5TMS)_960132.88_TRUE	0.753111727007377	0.682868507311125	0.759486473987273	0.658793884065169	0.699823326905514	0.664568667940849	0.719644158636777	0.701438946354786	0.693565394753826	0.771051664101527	0.743239414859176	0.691899569839585	0.649703570048265	0.652656080610705	0.698279084571958	0.76539604436024	0.778654258560681	0.791267733262936	0.706985566595216	0.704489920665007
Indole-3-acetic_acid,_1H-_(1TMS)_668169.31_PRED	0.750363207889102	0.731542029304736	0.772517884438564	0.759503976286223	0.769592600758976	0.765078082131884	0.738964130789558	0.823214181279316	0.778418771180148	0.743771330275227	0.731753413191642	0.749828593697931	0.78126484929712	0.788297128959995	0.748840825261032	0.696484324442224	0.77559545878773	0.749504152613164	0.730386902213399	0.757282405178929
Alanine, beta- (3TMS) [MP-1.1] | Alanine,_beta-_(3TMS)_394745.44_TRUE	0.749250833027946	0.726887023954178	0.744807820043455	0.695222175729212	0.671303005457158	0.629445238956506	0.694918944703766	0.631866442194032	0.743074402535604	0.698780087719763	0.737762219488275	0.685877263217432	0.742958240043778	0.703320487369083	0.63861689122992	0.616756091667564	0.653617244934772	0.623366252332168	0.625223471670887	0.720163926328437
Proline,_4-hydroxy-,_trans-_(2TMS)_446416.97_PRED	0.748971561943297	0.791284347399642	0.805106488093027	0.747426382705054	0.863154928988046	0.744354613241164	0.851673820194673	0.791647477448065	0.756648742588758	0.790342152315682	0.73202236471891	0.747567574012948	0.785952037096977	0.736064443745448	0.734419155583109	0.746537499368525	0.75562535787286	0.867036121019864	0.841025577793234	0.86461664292068
Cinnamic_acid,_2-methoxy-,_cis-_(1TMS)_527345_PRED	0.748761797560417	0.723228047690656	0.70099012784706	0.750731910077504	0.747350247444148	0.723720843718571	0.740711929951289	0.719627529096038	0.707959963996061	0.687395601913936	0.716138816464398	0.747126274222016	0.768293212076206	0.718094217198942	0.759500015133877	0.68363888889142	0.730455958914118	0.7476881240926	0.724015264845828	0.71651599914023
Putrescine_(4TMS)_519185.38_PRED	0.748271306318564	0.726389478771495	0.728478488581768	0.62431375352747	0.684502460895518	0.56279917840869	0.746560124919776	0.632087370519443	0.72821242587197	0.716415246741547	0.736068470600323	0.619096680881483	0.65440270004797	0.633334989312316	0.683096443047968	0.665362130772454	0.69412557922493	0.663476064482931	0.683989032010296	0.70123292957004
Pantothenic_acid,_D-_(3TMS)_680979.56_PRED	0.744868020432855	0.734383351770292	0.726583981832468	0.683274447011746	0.737566104205497	0.667952643380052	0.757736812168179	0.639863673908836	0.749689169126592	0.76829384613648	0.762938840240683	0.767834079649147	0.730359354039037	0.694429272195549	0.682317179631369	0.763888663123113	0.761635304378855	0.764617104987844	0.726348201972794	0.724778659307331
Galactitol_(6TMS)_590143.5_TRUE | Galactitol_(6TMS)_590143.5_TRUE | Sorbose_(1MEOX)_(5TMS)_MP_587087.44_TRUE | Fructose_(1MEOX)_(5TMS)_BP_585803.75_TRUE	0.744796365767452	0.638223504524819	0.748517721346256	0.772170016435896	0.913947154054769	0.882560807645745	0.93571249007155	0.878265560750597	1.07366770710391	1.0715328899401	1.03715389512006	0.706845363983243	0.696240555949427	0.775281258729625	0.718470958129836	1.20484504963863	0.710013582774168	1.05020709677506	1.14152819099497	1.12395000425832
Glucose 6-P|Galactose 6-P (1MEOX;6TMS) [MP-1.1] | Glucose-6-phosphate_(1MEOX)_(6TMS)_MP_775879.88_PRED	0.734520322184501	0.697419530029184	0.647173111020681	0.667060090124798	0.711870752740341	0.719289197691199	0.778551686273533	0.601052854445402	0.762275326134075	0.774263224172579	0.769759001029076	0.689496497895015	0.665915183396533	0.634322323032014	0.678762164852165	0.765275989407674	0.704664598452375	0.784211524700824	0.75607728952029	0.730407065061841
Pipecolate [MP-1.1]	0.734444022159753	0.694306887679466	0.693338619055022	0.741675585772176	0.741147640539727	0.726917643017188	0.742772241406324	0.709768617434708	0.66179663221843	0.683634575805978	0.673669404852856	0.774434420213811	0.779715158496358	0.767897473221817	0.756535878357704	0.645171587740995	0.753902141354614	0.706631173777705	0.679789014360745	0.671397025502202
Butyrate, 2-Amino- [MP-1.1]	0.734138468246509	0.712833474186364	0.701095483846753	0.696279042537263	0.71948067749004	0.676192159118017	0.688372492995242	0.678137380240911	0.677699988218014	0.647655903748527	0.697407885466028	0.688016042346078	0.716604512763815	0.69237480225118	0.678562300419035	0.726930745009837	0.701710077797619	0.661632309689412	0.684493631049658	0.673258772542271
Calystegine_B4_(1MEOX)_(3TMS)_598843.25_PRED	0.732602141027556	0.762063454734634	0.777167590579129	0.727916745937953	0.790004242211947	0.720248835839034	0.743431478023288	0.781918645438513	0.851307887536636	0.829972493851895	0.81584339344413	0.683927821110411	0.720107159554064	0.696554129689862	0.662249621215105	0.946605457799344	0.717451564099757	0.84055153055351	0.860946558918382	0.868500642447222
Epicatechin_[-O]_(4TMS)_963441.19_TRUE	0.729721611101933	0.657636012118915	0.746349954821047	0.671287295939844	0.699232412443011	0.657120995405941	0.715497029028449	0.683346180036703	0.691228284289757	0.785001089903201	0.738602373544713	0.690754738367174	0.638489259462743	0.662882519145068	0.706030281337135	0.758526217454529	0.767146797332102	0.792241926296094	0.700932950928191	0.703386608314133
Azelaic_Acid_(2TMS)_605555.81_PRED | similar_to_Fructose_Derivate_604774.88_PRED | similar_to_Fructose_Derivate_608269.19_PRED	0.720349816497496	0.718110687572862	0.721145986837986	0.758402832004505	0.747572923797591	0.734796690476091	0.734374124524337	0.730373911273189	0.70198798759869	0.722523081279456	0.695136527156981	0.731436581785641	0.731760060939446	0.744999401959348	0.762291881429209	0.691742445657468	0.737515240454152	0.72816792520141	0.75180357907907	0.709545714719047
Caffeine_754467.62_TRUE	0.719516380727118	0.689682557520828	0.708716758216726	0.720516932277672	0.71656667230623	0.724240634187594	0.698916214493343	0.726646994672686	0.683756062650916	0.673429478720711	0.695897258644806	0.719390448858045	0.736400189453452	0.748035292520386	0.718781400537987	0.709471516589963	0.73279620595315	0.629188469951847	0.710269018785051	0.703165080309828
Ribonic_acid-1,4-lactone_(3TMS)_550463.56_TRUE	0.717752322118135	0.711283800342182	0.741514962097494	0.671859066952775	0.705811764696335	0.655559171151263	0.680986671921641	0.712038440125415	0.701607435059419	0.692827959585262	0.693175731448485	0.675885649237752	0.694824166666516	0.716063989869387	0.656261827616696	0.689609381262936	0.742831614302061	0.695961229467337	0.677593496114643	0.665962070985234
Rhamnose (1MEOX;4TMS) [MP-1.1]	0.713214334731899	0.698430465020618	0.433434031027403	0.661161287475285	0.718338709286714	0.702421090307889	0.698227866884012	0.653098326042323	0.648243868509996	0.678667893862936	0.625301979958232	0.718161302914332	0.726713905900582	0.702119399635222	0.73229802252654	0.638538929789105	0.727573558074839	0.699841837218441	0.697446184672533	0.693510789918132
Turanose_(1MEOX)_(8TMS)_BP_876686.69_PRED | Uridine_(3TMS)_876823.81_TRUE	0.70693241261203	0.658861272461744	0.675705263833589	0.645936872283847	0.624585494915772	0.598448383668299	0.667038439834693	0.516570867377627	0.695632850545678	0.657772420992878	0.694627342584787	0.734412312931878	0.725721773992585	0.647421289830942	0.631642047642117	0.645171587740995	0.657795150746512	0.693391206624727	0.612368346812205	0.612501017938387
Benzoic_acid,_3-hydroxy-_(2TMS)_507250.44_TRUE	0.706480864232694	0.672959378149456	0.719073087959949	0.690852483755768	0.711044623761287	0.720885529634989	0.704489470221626	0.663946506882775	0.704926439534213	0.693033324999341	0.669144523513303	0.691276123386123	0.707755222843257	0.732256060599383	0.690221082640117	0.685854739898264	0.71074058489155	0.727995212537902	0.678433506383155	0.691859989679796
Homoserine (3TMS) [MP-1.1] | Homoserine_(3TMS)_405393.81_PRED	0.705483080338303	0.716004401977154	0.68288485253503	0.666723877912019	0.740916354909137	0.654772719719074	0.717275991156068	0.665417546582986	0.657966125917785	0.656493511556665	0.641535495339967	0.675885649237752	0.720013480030575	0.673281248095639	0.670773915056848	0.642552328912574	0.640896099948762	0.730055191920842	0.713317597301125	0.746992770396771
Butyrate, 2-Hydroxy- [MP-1.1]	0.704753605320582	0.689284033405436	0.669609359316361	0.627017404899899	0.731151193129643	0.627040857104079	0.684486511759249	0.665783416673792	0.634850621679779	0.611878902708034	0.69690593668671	0.613125530144451	0.685361677679772	0.646249312465447	0.672653507487517	0.637177808659183	0.642740319633059	0.665168737590509	0.668714022315486	0.72908082431393
Glutaric_acid,_2-oxo-_(1MEOX)_(2TMS)_BP_486148.94_PRED	0.700025705752921	0.655862362551889	0.63286832510512	0.678177040104002	0.678589287029107	0.729853527754049	0.67012686860129	0.644247904591612	0.602464494508831	0.630821829989366	0.610860767867842	0.735682312781619	0.734868164416723	0.706871493388906	0.732795505166252	0.665248014779244	0.70666007971908	0.702613649041286	0.700205299153935	0.656399722906191
Nicotinamide (2TMS) [MP-2.1] | Nicotinamide_(2TMS)_455050_TRUE	0.696508706743625	0.650928306335314	0.670871223095287	0.650738325744186	0.717632116107809	0.693047958272372	0.595362539776134	0.718815162924611	0.613115604449435	0.601961791828435	0.648161806145302	0.707787939811458	0.707552989380678	0.695688218420851	0.651350267431299	0.679943523919711	0.73454704558686	0.705736251020801	0.692832730062795	0.665131565840498
Adipo-2,6-lactam_(2TMS)_492238.44_PRED	0.693600927154211	0.639597348455637	0.631923326057311	0.690270652341281	0.674529361345973	0.719929571807195	0.663785969590837	0.655824610271064	0.581548671006702	0.615715788374106	0.613855882603658	0.726323814606902	0.727967915602691	0.710522945635974	0.730436401656609	0.640424729413482	0.715819044742092	0.714555750292555	0.693119113999687	0.638542196335548
Asparagine_(3TMS)_476136.78_PRED	0.690341961630234	0.679143870244389	0.684168977093303	0.725761065295811	0.680031796104663	0.68231479964506	0.707126208002131	0.684994468124345	0.658858045570865	0.685579649969597	0.689531514396123	0.686521878680416	0.686171621750094	0.701282657075097	0.755924063563357	0.65425206400309	0.705499015942086	0.653333016064704	0.694448711806311	0.668338671360745
Shikimic_acid_(4TMS)_586124.94_TRUE	0.688738348967611	0.664447403012739	0.661038632178113	0.654679894395495	0.637135389494702	0.646861884654935	0.672154573135968	0.613730936928367	0.68778347562537	0.649542570780581	0.671127709747443	0.640705495691524	0.659242369186197	0.633051790908689	0.632179321720994	0.62642507609428	0.613203219904911	0.627382045183782	0.612527739566496	0.659105237222007
Glycerophosphoglycerol_(5TMS)_761775.38_PRED	0.685380772637775	0.724023968678681	0.656449581729968	0.693516855150207	0.559200067807411	0.542401660489519	0.668383769572114	0.480674832366726	0.715202320937046	0.607776545024547	0.706813094960698	0.632825177512325	0.716986840072759	0.660145664115742	0.626305654319135	0.511145894955912	0.541058381924296	0.485523203725961	0.511720269284189	0.635373827320355
Uridine_5'-monophosphate_(5TMS)_995880.69_TRUE	0.68068912665449	0.740254732946789	0.718693478260289	0.857900106127876	0.787326743369704	0.823535414257871	0.721979248579384	0.7830577777465	0.710216999515307	0.786627638225504	0.723323824691811	0.772180108492842	0.735124507720882	0.786318635003384	0.826137620903164	0.816151295308901	0.81235060214051	0.754682720641788	0.825558611000975	0.686890112799022
Orotic_acid_(3TMS)_587220.69_TRUE	0.676837187327358	0.68515538584238	0.667057302947509	0.637406113815476	0.605119331488259	0.58243292193672	0.639788694178462	0.56825140175831	0.662378097099471	0.594059868281294	0.661164646771542	0.6229581259	0.668894963319551	0.625510256107043	0.63001918228221	0.532895050170636	0.603390962839682	0.569143815329443	0.585284113243502	0.63067739647411
Threonine,_O-methyl-,_L-_(2TMS)_334293.72_PRED	0.675968832745761	0.669007104210747	0.663681554801675	0.706158056045518	0.665504746606868	0.705818550518017	0.683076476500867	0.710053931621559	0.641793312676679	0.642841463682634	0.638902222071058	0.694471644104049	0.690049177654357	0.686664081476854	0.707202584610168	0.653515258531619	0.691698260430064	0.703222944794316	0.693690320250479	0.658817420276848
Tyrosine_(2TMS)_669279.62_TRUE	0.672226402916743	0.642779656817915	0.667442551833241	0.71746065531926	0.630607222131612	0.692671850505354	0.655978378606372	0.702334318448068	0.697752648423634	0.615880578804731	0.68909206066115	0.703791581107526	0.712926792366533	0.718262265759824	0.697925607072995	0.614874361627941	0.717837864174753	0.695109273044624	0.679996519735537	0.601415683835584
Spermidine (4TMS) [MP-6.1]	0.672003590306051	0.694177735929239	0.67361492467447	0.724051390932782	0.616101179903408	0.49083289590487	0.483266095366243	0.645276059040645	0.654653709226485	0.607082671138249	0.641891221668279	0.591457026903809	0.546407106478193	0.535970923434072	0.685507175114839	0.698986136175401	0.63082361515599	0.730565944580358	0.502367415119659	0.665869993587007
Indole-3-butanoic_acid,_1H-_(1TMS)_755498.5_PRED	0.669984600981299	0.653632479141141	0.676558607805476	0.683274447011746	0.677807436184265	0.685621253283149	0.663573943957554	0.689370153354371	NA	0.631870451720485	0.664281419469355	0.678498501836409	0.688804777316402	0.709993674180723	0.67532962046509	0.669637708707701	0.687756421354712	0.591699024249085	0.675153139329572	0.653749233333282
Oxalate (2TMS) [MP-1.1]	0.669306069203601	0.692315629094696	0.712600533907589	0.665287215549239	0.720788842923734	0.683777750791881	0.674853537052609	0.740508855909472	0.624950649180324	0.695780736743554	0.636837114421752	0.647946713314454	0.649269556116525	0.692964443357879	0.650516631436509	0.658601148547994	0.688034544180591	0.649082695881085	0.672999828764698	0.691226854608095
Glucose_(1MEOX)_(5TMS)_BP_599322.19_TRUE | Idose_(1MEOX)_(5TMS)_BP_601382.12_PRED	0.669079269580045	0.553886190941043	0.660237710965339	0.626049230645777	0.755966136592383	0.720673569303373	0.722427458470998	0.76630249165476	0.864692268280081	0.845554059618369	0.830671861016837	0.567769323863749	0.582042598321123	0.640935984951289	0.541173721196027	1.00902091134242	0.662411547131464	0.870387373453751	0.913434603037294	0.919212924468315
Gluconic_acid-1,4-lactone_(4TMS)_646839.44_PRED | Glucopyranose,_D-_(5TMS)_644536.81_PRED | Glucopyranoside,_1-O-methyl-,_beta-D-_(4TMS)_646436.88_PRED	0.666793936127544	0.662899740223826	0.692786632178836	0.672510081479549	0.725585349166118	0.737693513583494	0.727858788633104	0.737723811476477	0.678578923832818	0.698284011531772	0.669543145201073	0.691795829223359	0.683846693715493	0.712449021264726	0.715807290881726	0.797344834357797	0.823628343983982	0.753367495821139	0.765739270835171	0.703534132761348
Putrescine (|Agmatine) (4TMS) [MP-1.2]	0.664826165421323	0.606807047675673	0.668210451443002	0.554521477166726	0.642734372348422	0.542401660489519	0.646618296472013	0.628068132320236	0.628317333029005	0.698284011531772	0.635978915497146	0.577959842243483	0.592646459005903	0.585874896273159	0.600514325089038	0.604097584429443	0.661433252261422	0.614829986517213	0.649164568198622	0.665593460513047
Cystathionine_(3TMS)_766080.12_TRUE	0.662716706873516	0.717361453500843	0.669735966212845	0.787582900272601	0.708167846466878	0.735283014725612	0.704987036628888	0.641337103098264	0.620268397321456	0.623286358367183	0.660428520941903	0.67827296927282	0.712730901571412	0.727565221382455	0.776420216337344	0.621363269932328	NA	0.665814883626965	0.713568994867521	0.697071541887959
Diethylenglycol_(2TMS)_306329.94_PRED	0.659501001401986	0.62317891002228	0.682415493085923	0.605252645370285	0.649879104907977	0.587472606979306	0.636453586080562	0.599469033602531	0.619013730402202	0.618980364225495	0.682074438503337	0.63812124703328	0.66656762882806	0.600185694366205	0.625887603624541	0.61312923493213	0.649329576915909	0.677247820472616	0.658709841213156	0.611615042048958
Benzoate (1TMS) [MP-1.1] | Benzoic_acid,_(1TMS)_349981.84_PRED	0.658898551368858	0.650035853912945	0.61517660872202	0.591853692332857	0.639817979496512	0.602600290199228	0.603458603772163	0.70158848784205	0.710578152304619	0.620107697921336	0.626741638595022	0.585151227371706	0.620845297440124	0.627575271619885	0.586116743594046	0.606446721355631	0.607538683508414	0.623873943253649	0.590318611504827	0.599926568102215
Glutarate, 3-hydroxy-3-methyl- (3TMS)	0.6546185730588	0.62139941076628	0.659029239912109	0.63104322533941	0.62971748889	0.598226962079967	0.660468966144789	0.581929112194861	0.668362413588253	0.63541537648989	0.672696633672914	0.673229792488165	0.635205312758044	0.623719157854883	0.637713132771271	0.610555436403089	0.643593875510813	0.619938548706321	0.623301508779539	0.6180884654829
Glutamine_[-H2O]_(3TMS)_MP_494765.41_PRED	0.650478723228879	0.571330998083026	0.554281712371507	0.764207209568448	0.612189611076524	0.683645286155566	0.752460165625515	0.485263377913056	0.573276191028954	0.599794848081331	0.805777813576452	0.786588432659915	0.774171731298573	0.722735236822277	0.878926521382389	0.460827930916302	0.685137495389753	0.639911785450454	0.763317927387127	0.590992760087184
Octadecan-1-ol,_n-_(1TMS)_754094.19_PRED	0.647530602798866	0.635197778845612	0.627442822462109	0.638409596618885	0.655206676899819	0.667369054097357	0.633050589497962	0.629417977197465	0.632198657398123	0.612047614691244	0.624643254130697	0.627967056393571	0.644267913231565	0.67305969834576	0.653121964108008	0.635252026408645	0.660558706536025	0.540449946577578	0.623598730336286	0.638000139220254
Maltotriose_(1MEOX)_(11TMS)_MP_1072282.38_TRUE	0.641873276057155	0.533206645176662	0.574667044369249	0.565817584872631	0.47662753365501	0.471576908045686	0.51982146492759	0.48875230253549	0.542642938275943	0.491605932575989	0.577323928129214	0.179476014103005	0.600852926401907	0.468394514321285	0.537311721624981	0.439001766747081	0.45859492042425	0.602729841901479	0.454695595818763	0.538475371103056
Nicotinate, 6-Hydroxy-	0.641471234620196	0.542758177770528	0.606419335753211	0.590652459145015	0.72354630149701	0.71084421367799	0.665052507386448	0.665234329423792	0.530585811115618	0.677656142216405	0.604545975742672	0.753763733838808	0.626108901895501	0.670827462690721	0.70644995969761	0.708003753286306	0.75617540720435	0.749052132880576	0.75180357907907	0.562999564672976
Cellobiitol_(9TMS)_870156.12_PRED | Cellobiose,_D-_(1MEOX)_(8TMS)_BP_872226.81_PRED | Maltose_(1MEOX)_(8TMS)_MP_871061_TRUE	0.637120621465099	0.504952065050186	0.560152642419413	0.598881525826794	0.514008164265509	0.519857130640828	0.491482342151657	0.477022433027146	0.509192229376243	0.523265035050698	0.571345604808202	0.561842695045777	0.596300465777453	0.462443582641333	0.573612040605638	0.515685903601328	0.514640625293382	0.643079104639284	0.487556477757849	0.495035803456666
Butyro-1,4-lactam,_2-amino-_(2TMS)_452058.31_PRED	0.630944535919149	0.663106916223252	0.671623888790792	0.618542806544016	0.698242953746772	0.622508479499725	0.711722294314216	0.648929052694444	0.610616275939696	0.672384590093616	0.624511180741551	0.628121107501196	0.669663388015786	0.633334989312316	0.608188684933383	0.601712463703088	0.640524742096873	0.738759477802826	0.706109970426877	0.715625928009029
Fructose-1-phosphate_(1MEOX)_(6TMS)_MP_762927.75_TRUE	0.620615377479427	0.659391235275081	0.647028608775842	0.547698081807891	0.662100165701953	0.622125141665474	0.74558869749493	0.688245993968513	0.722877072211722	0.757808991134024	0.730333902754381	0.538929228291655	0.535105611763378	0.53978465842707	0.53779966258501	0.807513293008832	0.568866232252605	0.605986676128726	0.703453511189889	0.725298135871372
Histidine (3TMS) [MP-1.1] | Histidine_(3TMS)_678782.75_TRUE	0.614882324953132	0.597145769948231	0.578381073957961	0.628830688632711	0.621023593852538	0.629261516574655	0.58735717340067	0.547856343786987	0.527757564775046	0.55318806759342	0.573545644285789	0.606749222418361	0.635993249526867	0.625510256107043	0.666299293373824	0.540708291071885	0.597368876991446	0.622175144376574	0.635737371945623	0.593412164843218
Cinnamic_acid,_4-methoxy-,_cis-_(1TMS)_617496.56_TRUE	0.61040721262449	0.631119002697056	0.571771368828495	0.637002990545678	0.605462784074506	0.634686706027657	0.552501906324952	0.618797970467287	0.541435878493797	0.574689314653058	0.595927003313406	0.573917439776051	0.584219486809424	0.612055053338969	0.570869346739761	0.583522463316807	0.639779481872776	0.60058548220242	0.552302986829532	0.618698060280865
Ascorbate (4TMS) [MP-1.1]	0.608779038304033	0.594680398248874	0.588451573616722	0.664947335564241	0.693411449608188	0.685882949207244	0.578949113977892	0.637737411545377	0.709201529402545	0.589089304000727	0.579443297056872	0.653435512409553	0.683963734044497	0.649740239414769	0.579146328847166	0.529110215015167	0.879619167322377	0.6942526161489	0.681544133691223	0.639513546550644
Cysteinesulfinic_acid_(4TMS)_638681.5_TRUE	0.608123236839311	0.632985207308574	0.636750470358183	0.624531697842095	0.635562681689294	0.655872712522501	0.630484427228366	0.656403426172441	0.537139962592176	0.63541537648989	0.573181079184018	0.579423986650761	0.628595833338673	0.639171142721417	0.619335074487769	0.607277183408219	0.635235010873611	0.599600896350997	0.628854737069975	0.595658092213751
Norleucine_(2TMS)_337195.69_TRUE	0.604804496237603	0.600327919740678	0.604390113255595	0.612443569664887	0.618659625360556	0.625919299118095	0.599303839454009	0.654466682412366	0.584682427867803	0.594623765502268	0.585805597582101	0.630414398437715	0.62527138869588	0.632768099127802	0.624626777526643	0.600678978056726	0.627367863627608	0.634484969075268	0.617853047711269	0.626661653960922
Linolenate, alpha-	0.604636791489794	0.627643151529734	0.61828400396189	0.670137722646227	0.636850525909469	0.588650336058141	0.642938596722918	0.620219616346517	0.625919616280221	0.598883386137263	0.59843762316385	0.661020136496927	0.638179348205587	0.656505295496986	0.674511015422871	0.612809827095484	0.619666472456882	0.605035854611904	0.639539012363463	0.61212188162657
Guanidine_(3TMS)_266995.5_PRED	0.601759380607474	NA	0.570191574681977	0.452597304999571	0.588706800640197	0.573421124270859	0.534451745888647	0.653098326042323	0.518272592896145	0.60898376452134	0.496305731886594	0.535138518208319	0.548575999478484	0.582623744595111	0.536331298355336	0.520676135603589	0.588920723372565	0.606176143715975	0.547556959780873	0.611488094692079
Pyridine,_2-hydroxy-_(1TMS)_208781.09_PRED	0.601759380607474	0.48962619279052	0.539471557180776	0.568293578170957	0.572628051216813	0.583888495133142	0.564817800553456	0.571693063436877	0.505966937372807	0.519144162956569	0.538213403211876	0.557846474959652	0.565928054636692	0.56787436345086	0.588078438477547	0.540962099222237	0.600249158308291	0.575501419191026	0.627122202456472	0.531898461959899
Spermidine_(4TMS)_728678.88_PRED	0.596555688123168	0.587547218495118	0.566756259745848	0.649527746127157	0.533447719812772	0.421540203940369	0.387352478988282	0.550318872028113	0.584371727268125	0.515831655156459	0.5377579578725	0.508056667264289	0.463906619067586	0.423869427228698	0.600514325089038	0.606779437862062	0.563789860921337	0.616610610028279	0.403142009373297	0.57881091651324
Fructose_(1MEOX)_(5TMS)_MP_580248.19_TRUE | Psicose_(1MEOX)_(5TMS)_MP_579668.94_TRUE	0.595139826345572	0.513822636596898	0.538655319488603	0.430622372381064	0.589462627057986	0.593507626082524	0.620494467117464	0.558512438419662	0.661115646350502	0.649274379737845	0.646674674685089	0.463992753569515	0.458369942480851	0.447649065670135	0.436059038335516	0.6818021685233	0.49681802261324	0.657877789350454	0.627267312439886	0.610213357550674
Tryptophan (3TMS) [MP-1.1] | Tryptophan_(2TMS)_789997.94_PRED | Tryptophan_(3TMS)_791196.94_TRUE	0.595139826345572	0.544751425429064	0.554530407815459	0.59721703131346	0.55346950868685	0.527829604575542	0.537185030575128	0.554803760750301	0.581390403716394	0.541141228559079	0.564170857222368	0.551288838090484	0.55925848894505	0.550717558117405	0.610666192960866	0.633161910922334	0.556074438365251	0.602923323133349	0.586040223227467	0.606461393130729
Fructose-6-phosphate_(1MEOX)_(6TMS)_BP_(Derivate_not_found)_768948_TRUE	0.594248694370846	0.544647101865168	0.494025588135399	0.525133474758107	0.562768489994602	0.573421124270859	0.622947061558937	0.456956150926927	0.63021063624832	0.615054956194151	0.619545676377014	0.526991118316649	0.530053624045487	0.504886748554861	0.545408601522642	0.622569171531713	0.542420379025632	0.645449664708145	0.62957102443004	0.578656811548146
Erythritol|Threitol (4TMS) [MP-1.1]	0.592451840135063	0.584442597170981	0.595045804549399	0.601409662460609	0.617704728224634	0.598448383668299	0.608989497990633	0.591053853860324	0.623731351538949	0.57039235672867	0.598125955780285	0.610399069966422	0.614869106534404	0.577522345403184	0.611585339419437	0.5932458928137	0.598815371294042	0.618545995260027	0.612846040680222	0.575544880305054
Cysteine,_N-acetyl-_(3TMS)_554708_TRUE	0.592090105850371	0.596762919101513	0.630814175293615	0.627124626918767	0.61185953542534	0.606440234860025	0.572124403556865	0.618082871159809	0.602742835927232	0.590634909101103	0.573727613755797	0.558084306281967	0.61216098180552	0.607808257918715	0.601819535768354	0.5932458928137	0.629237739953304	0.599403227745708	0.584714632695139	0.580191584458536
Riboflavin (brk) [BD;1.1]	0.592090105850371	0.701221058333697	0.645430959250103	0.698995357962876	0.569687564696598	0.548489406349689	0.590998909639537	0.568882123378381	0.640472256121107	0.573412074828494	0.619409296862262	0.461849713799563	0.582916858572458	0.581849241156252	0.549080005890796	0.475398568060073	0.499486393309796	0.46810791941258	0.51232442982079	0.69343254434592
Pyridine,_2,3-dihydroxy-_(2TMS)_359008.03_TRUE	0.591727575670022	0.571953617394932	0.582438623841092	0.607080230684284	0.566263331198083	0.570828608702731	0.597265962873161	0.557843849749189	0.555551922836961	0.550012264551167	0.579618642154292	0.607975033696363	0.627605626310508	0.592915678467317	0.625328477504865	0.52125284465456	0.552075498922148	0.554273007677369	0.586980271190848	0.588538275321199
Alanine,_N-acetyl-,_DL-_(1TMS)_320211.75_PRED	0.591364246083997	0.565252605934154	0.618966922440788	0.589442338824453	0.624585494915772	0.619221569646394	0.608989497990633	0.664683544838018	0.582809352687185	0.593871468355974	NA	0.557608292594666	0.605660662061069	0.608633596943755	0.593821569280576	0.569815862781397	0.574348090284978	0.602147947397248	0.56050040561021	0.625730238722821
Glucose,_3-O-methyl-_(1MEOX)_(4TMS)_613285.81_PRED	0.591182280410618	0.592099734231175	0.556261205758821	0.640299417881262	0.54898090899377	0.611425915132202	0.526214504039901	0.548210224085271	0.545425408543305	0.574264678691138	0.567798709571039	0.558084306281967	0.588908337317296	0.597739568353668	0.538286102185867	0.579218611640701	0.608898159530868	0.543030648676125	0.514718099695117	0.577107996604586
Glucose,_3-O-methyl-_(1MEOX)_(4TMS)_618213.81_PRED	0.590635174538288	0.618728177156295	0.59168059453938	0.629888010891814	0.60580554211511	0.598005245065812	0.623082267542396	0.581636295906091	0.594033899494084	0.595372607770048	0.602130729809448	0.609882690252238	0.615583710325435	0.617758170738496	0.624626777526643	0.584867294452782	0.620509219796576	0.60407917463843	0.592505396879977	0.568490347379764
Gluconic_acid-6-phosphate_[-H2O]_(5TMS)_762561.19_TRUE	0.587872059471318	0.582535388625703	0.61673737584225	0.552842127877697	0.584099664177566	0.574446910722258	0.64579444733842	0.531157263001518	0.624220156563265	0.643954506347188	0.637933748002943	0.586750928432529	0.556203976646362	0.525615809238298	0.538528761858298	0.621665621999687	0.59094822404804	0.636367036585338	0.601473874701571	0.615379859018864
Eicosane,_n-_695693.12_PRED	0.585061816810709	0.540206305372808	0.662892964983558	0.595144893590835	0.599349516837001	0.627227049703342	0.600700264932311	0.649330356178534	0.630328246677871	0.617682366388635	0.590292731405721	0.612448221603484	0.5958985015884	0.64832703176664	0.595690500450757	0.592154454239238	0.665843194294497	0.70543679351528	0.617390362410988	0.636910789949784
Propylamine-2,3-diol_(3TMS)_315724.22_PRED	0.58392416050407	0.521174862886002	0.577731500344629	0.507633121213127	0.548741341754852	0.536082386632667	0.555970117608127	0.516148141979781	0.558490290583729	0.528414729891374	0.583428091284952	0.53650258823257	0.545860326670511	0.532065723302212	0.542124657870983	0.566192028429673	0.566932421649754	0.580495871287698	0.582608693773319	0.543862143992945
Chalcone_methoxyamine_(1MeOX)_706113.94_PRED	0.579097514848711	0.579166343664796	0.574887767595965	0.641579986536533	0.594843834368195	0.619221569646394	0.601778366619611	0.57231174000157	0.540016345946362	0.565531126008192	0.521945652377614	0.610742407378882	0.624598254262801	0.638487231421934	0.653356697255141	0.523538555653199	0.587554927071856	0.611937820598036	0.621656660809065	0.5804968763221
Sucrose (8TMS) [MP-1.1]	0.576132169658741	0.558755461855819	0.572890909837396	0.632501795880263	0.577350776186162	0.601082682597254	0.595362539776134	0.46276052970131	0.622379593451469	0.57928875109623	0.587482304212916	0.571748475361994	0.540854652814843	0.587382675944078	0.559396446663021	0.633442219307241	0.537835479067753	0.566721478079844	0.594483553537002	0.602624382847733
Glucose,_2-amino-2-deoxy-_(4TMS)_BP_659366.94_PRED	0.57573272728009	0.555948403195049	0.567218315216192	0.626480237967437	0.535274460440669	0.550273075110475	0.551260448718512	0.526026625623114	0.572275006806609	0.539833602327507	0.58291396582963	0.626262716255726	0.59488921649086	0.584544038559041	0.608967085056148	0.604772390537638	0.607841769399584	0.584683640676841	0.559833391674317	0.539449952335215
Proline_[+CO2]_(2TMS)_534232.75_TRUE	0.57573272728009	0.533206645176662	0.497878107110203	0.567214939982773	0.538615613835411	0.498274895150708	0.420397028581553	0.401317309934358	0.570930536583582	0.388175810890933	0.617763549825087	0.526702702649199	0.611431122377117	0.538016024613495	0.589314233959288	0.496335735471047	0.573789464392816	0.597011365271369	0.53397666197723	0.403864336264783
Dotriacontane,_n-_1074008.75_PRED	0.572501841400505	0.545791133364731	0.608243385070226	0.559133949108822	0.621960026031852	0.306995543972597	0.558971673805447	0.652901985888444	0.601065672718517	0.633652547242625	0.567609820285956	0.189112818800358	0.610881567032132	0.594719008536628	0.548853024164008	0.565326963617123	0.620088390069248	0.607683618358025	0.577117144163274	0.614633564088796
Allantoate	0.571888933438366	0.421915083395611	0.588451573616722	0.605007417162542	0.494044670763739	0.573678165122506	0.510810235952879	0.672771711243284	0.562446644080949	0.56144305379896	0.540471258146227	0.527279019415285	0.560514438356662	0.669699763993767	0.529549473587669	0.74003706212702	0.552288430074975	0.590027205475927	0.58144798741422	0.598561364796211
Calystegine_A3_(1MEOX)_(3TMS)_MP_554707.88_PRED	0.570036410358395	0.537615297307295	0.585575198134756	0.643045214464683	0.584876269400221	0.589819777038213	0.595202938628513	0.61052042355339	0.591522273396805	0.560289049568139	0.539797262869111	0.558321787594853	0.561512250709213	0.592552603531969	0.637842557866957	0.567266644604891	0.563988053666386	0.580272302251974	0.540661992001973	0.60395733691947
Melezitose_(11TMS)_1053876.5_TRUE	0.566901821838827	0.443365997084743	0.553032771965868	0.650087588717943	0.54898090899377	0.642845329548936	0.45328348625814	0.536522187430315	0.537966935749533	0.565755263661663	0.533364869552742	0.669817571171821	0.598691578170873	0.589803426680456	0.62278764654671	0.591055311328728	0.593612964146869	0.578472065639123	0.517659787647015	0.595099397672095
Dodecanoic_acid_(1TMS)_528526.38_PRED	0.564136090400662	0.576421885245639	0.570644438056478	0.704763726164093	0.5868023559602	0.615269495690502	0.588025234986687	0.52441777792837	0.559035433930198	0.55724984829166	0.596873138932492	0.611426898428453	0.628101484556726	0.608962564815319	0.716595391943262	0.567266644604891	0.620649255588515	0.627547136819201	0.606188358555906	0.537887917792422
Proline,_4-hydroxy-,_trans-_(3TMS)_450628.06_PRED	0.562843770830819	0.576594726187937	0.595045804549399	0.557992967613797	0.637135389494702	0.542711403128045	0.639298782650045	0.588816101727066	0.551992979460906	0.598517370007767	0.533833059330691	0.559032141741145	0.602213501860685	0.55580669233175	0.548625716079485	0.571074990389789	0.549930767593527	0.658554932458064	0.63683297566085	0.649541951524145
beta-Galactopyranosyl-1,3-arabinose,_D-_(1MEOX)_(7TMS)_879025.31_PRED | Maltose_(1MEOX)_(8TMS)_BP_880335.56_TRUE	0.560228320669763	0.483743892608637	0.484183602925342	0.513962727956435	0.47178984124014	0.443167674973204	0.508412362647491	0.412261545095063	0.501908445535012	0.455396495504341	0.538667547277081	0.530130127556856	0.533340448194286	0.429406991580743	0.48338315508817	0.470691571901853	0.476130660561835	0.545848669194391	0.445742657547647	0.43716429924686
Pyridine,_3-hydroxy-_(1TMS)_283546.44_PRED	0.559788347376304	0.621862565175978	0.556997638498426	0.626157088997148	0.594111678614967	0.599331131441087	0.578066884017996	0.562472127411107	0.57394027503656	0.54192080032551	0.550673619146461	0.543155159428615	0.569518328712707	0.605306840973839	0.597203361235308	0.547663060169178	0.579291503555599	0.554008269900559	0.57731661281976	0.597323197039792
Butyro-1,4-lactam_(1TMS)_241244.02_PRED	0.558239122661036	0.530731937723652	0.502995255150366	0.468328478048617	0.486254374057947	0.508087478382351	0.446816019467917	0.526026625623114	0.492120612681667	0.498177643224098	0.554619028729617	0.618116707082372	0.529145550200499	0.543511114889864	0.551332077386317	0.602739135108838	0.67085905757812	0.409468343596841	0.437709670422176	0.442416560014823
Glycine,_N-cinnamoyl-,_trans-_(2TMS)_737734.19_PRED	0.557793798334559	0.555850771290361	0.538927832542606	0.595925024722766	0.549220138099564	0.566862385169805	0.578243702849323	0.519502192483239	0.537966935749533	0.534495642295246	0.551930149916814	0.576482291487724	0.587218923386762	0.597033872596794	0.600022079505415	0.540962099222237	0.579111059418377	0.55870583160204	0.576917421891136	0.598561364796211
Pentadecanoate ((1TMS)) [MP-1.1]	0.555322765103507	0.540206305372808	0.574224739997297	0.578705913720104	0.531069747619925	0.527829604575542	0.531673030573256	0.551710899980363	0.54835526452388	0.593682850501252	0.530048349227802	0.568216328368368	0.576922161331795	0.566813519040672	0.561087294283941	0.547176462067666	0.576012586693809	0.595801473420997	0.537868228781311	0.54797754493597
Orotic_acid,_4,5-dihydro-_(3TMS)_616339.19_TRUE	0.554187199612987	0.538375121295639	0.53756089656095	0.569517660096574	0.516925513280628	0.549977123335978	0.496455757401532	0.506137916605537	0.507463402049866	0.518247404781285	0.531240780286696	0.516883708739685	0.552039813886424	0.570184175810487	0.487119140330593	0.525231086075661	0.546439474994169	0.501923570564846	0.461923897507104	0.554858495503851
Glucose, 1,6-Anhydro- (3TMS) [MP-1.1] | Glucose,_1,6-anhydro-,_beta-_(3TMS)_558133.69_TRUE	0.551661061066732	0.529594975112886	0.518409873595941	0.570581268384478	0.59702151477384	0.618634717203206	0.529794559243831	0.623956134329803	0.518968545530688	0.504820521779166	0.476805184258256	0.596217505544461	0.569281430859662	0.599490542655043	0.625048171144995	0.577623603934849	0.635235010873611	0.623026867129321	0.608166326506556	0.518805122888818
Maleimide,_N-ethyl-_235945.08_PRED	0.543355564256686	0.502157206411543	0.493315693590435	0.457205136013751	0.448779186238126	0.472051022140352	0.4110548112005	0.547146467662289	0.429915133528064	0.45138113240405	0.529328572987925	0.59394999484403	0.504264188268885	0.531273317645885	0.543540423262898	0.575200033363206	0.635235010873611	0.44424991927576	0.418661757958241	0.394975980290624
Melibiose (1MEOX;8TMS) [MP-1.1]	0.543112001905612	0.486857620170412	0.473739364958271	0.48371215656385	0.477359689408238	0.478550387616958	0.519570628887383	0.349250432494156	0.483158361739212	0.509946605738793	0.53615354309281	0.585552641814972	0.550716306564946	0.474886027322976	0.483039101099168	0.483308216610471	0.500073486408643	0.559985877338905	0.498793533961335	0.461009250082763
Spermidine_[+CO2]_(5TMS)_822511_TRUE	0.538665167985854	0.53431964002094	0.562777464647744	0.519643445467484	0.491038790723592	0.43210453400322	0.512127675311287	0.463330701937029	0.565090570823316	0.536383869880799	0.558067990271108	0.492059763831311	0.548036485861106	0.487833695401432	0.523800012871502	0.437036929751977	0.439795828313607	0.478789631805422	0.432785080723988	0.594257883300612
Xylitol_(5TMS)_501235.88_TRUE	0.537155814831509	0.48193851115879	0.551521882529445	0.451973002012944	0.497971343521362	0.456165323485428	0.508412362647491	0.505689668138647	0.542642938275943	0.564856858539256	0.530287552154348	0.510309105950234	0.495542981395021	0.455846668756068	0.49845100309232	0.543227945819739	0.531917074803932	0.53958009181803	0.503647108925327	0.492233441166482
Fructose-6-phosphate_(1MEOX)_(6TMS)_MP_767170.94_TRUE | Fructose 6-P (1MEOX;6TMS) [MP-1.1] | Fructose 6-P (1MEOX;6TMS) [MP-1.2]	0.534094985629039	0.4906348644812	0.514998273589061	0.477944767360991	0.546569861320919	0.543637181998537	0.554346976805558	0.564419454680533	0.527757564775046	0.560289049568139	0.552138609375797	0.474300760661938	0.476974802093872	0.463249718154239	0.465576651405178	0.649904039737139	0.487277959749687	0.557155715547734	0.534239120761556	0.558717993692644
Cinnamic_acid,_2-hydroxy-,_trans-_(2TMS)_633587.31_TRUE	0.532542981371088	0.492776236700207	0.472939694212544	0.507187433787712	0.4576243475001	0.468703461049374	0.483888748560605	0.423997715382139	0.451513838160144	0.490898512302752	0.46391496644105	0.540261758761911	0.542819679636786	0.539281291593347	0.535838797192077	0.545214719385972	0.50946751101104	0.469484017062294	0.457712343739906	0.444812939864421
Sorbose_(1MEOX)_(5TMS)_BP_583432.25_TRUE | Tagatose_(1MEOX)_(5TMS)_MP_583026.38_TRUE	0.528331380827085	0.449890051123834	0.474931891753779	0.409745420540053	0.518652120333641	0.526811152700521	0.564817800553456	0.469485051207654	0.609017943393132	0.608122377852433	0.593697202813177	0.369482748212072	0.388485809676547	0.388553883088734	0.396195533394161	0.641890571580945	0.438519067913579	0.597612794048458	0.569971202343086	0.585011391660692
Ribose-5-phosphate_(1_MEOX)_(5TMS)_MP_705185.88_TRUE | Ribose-5-phosphate_(1_MEOX)_(5TMS)_BP_707635.88_TRUE	0.523735367830602	0.490203313783322	0.514370591293512	0.535777317977706	0.535014699787041	0.557505586351842	0.538086284452823	0.551363911221011	0.656268067872456	0.493709963281136	0.463187503776802	0.575204961417404	0.576922161331795	0.606812297376398	0.533353010986711	0.581385406786348	0.50695865657298	0.669762065210888	0.502367415119659	0.561811599850633
Erythritol_(4TMS)_410125.56_TRUE | Threitol_(4TMS)_410391.25_TRUE	0.523460979922899	0.516309098050635	0.534514549214069	0.519229351109792	0.541892175815785	0.5155406054199	0.527894741192453	0.486267204070223	0.554062802179384	0.528977006714819	0.534532768375616	0.551783833947888	0.54198043513603	0.55648850368809	0.535591970060673	0.529110215015167	0.548194456478775	0.553477436328871	0.529446430649936	0.517482582627118
Propanoic_acid,_2-amino-2-methyl-3-hydroxy-_(2TMS)_295176.81_TRUE	0.523186134320392	0.531636030884989	0.536459412791389	0.452285451360917	0.506179350619813	0.464793236464731	0.540318389564882	0.487762418480507	0.53123162950364	0.548774140780078	0.549830379425093	0.517190201752966	0.479878466032623	0.462443582641333	0.494976297384957	0.536850671836609	0.511665681685851	0.565003072114199	0.488260880489261	0.458519730327008
Glucose,_2-amino-2-deoxy-_(1MEOX)_(5TMS)_MP_608643.12_TRUE	0.517305870691049	0.525203362445332	0.582016026120165	0.487782467594042	0.560323291224308	0.448161679836607	0.512389921936725	0.518251810708951	0.540219888471799	0.532585292711843	0.557464762546378	0.498718693250449	0.472734523349667	0.486793186806574	0.515886903685763	0.531284229607736	0.542194167339395	0.507742281176958	0.497141767470484	0.50437460528438
Adenosine,_5-methylthio-_(3TMS)_995365.31_TRUE	0.516448436489871	0.495310564314978	0.485677961630528	0.549603067896516	0.506794573775566	0.521271410474849	0.47916132172425	0.506137916605537	0.310732317434194	0.49919149177873	0.473764596681423	0.533486266337036	0.505673250900676	0.512490325895748	0.498138257697449	0.518054181432981	0.542646277616009	0.523672548907447	0.504916461657946	0.498288964621212
Butanoic_acid,_2-oxo-_(1MEOX)_(1TMS)_MP_252911.77_PRED	0.514430232249135	0.485973823875943	0.543760119040592	0.467477302577461	0.553702489882732	0.548489406349689	0.489990965718948	0.633845004220592	0.487420326590987	0.589670624107426	0.497191251250369	0.542894256343516	0.541699720373885	0.542525701649476	0.507261524071181	0.480342198061039	0.556074438365251	0.561760395721946	0.54015771694329	0.609572371201865
Glycerol-2-phosphate_(4TMS)_556161.06_TRUE	0.514430232249135	0.499588058770587	0.56158936387474	0.538379578063285	0.579363790267276	0.56279917840869	0.504612603870302	0.594358653482246	0.559578775146615	0.536651840552818	0.529808785784274	0.553259775849805	0.519774097439328	0.57122335637004	0.547484247253804	0.517760109077841	0.603235300733947	0.580719118872504	0.543900901510617	0.526320561509118
Glucaric_acid-1,4-lactone_(4TMS)_660551.44_TRUE	0.511503514085415	0.490778470105113	0.493671009831241	0.539115539637539	0.537850403536509	0.503841148265034	0.545341877043899	0.438314216125781	0.56297884282425	0.603034559626903	0.598748680630424	0.541583375674191	0.526390458586537	0.522012415339403	0.542124657870983	0.674553590109151	0.523760970211625	0.609917738463376	0.643119751402724	0.601010858710498
Cytosine_(2TMS)_515287.31_TRUE	0.508222919010013	0.560949055270405	0.54055383904331	0.558808765733473	0.504631451338271	0.561422394415179	0.505707090197886	0.567618439559397	0.510172027021675	0.467291567938102	0.523449925258064	0.543415641362465	0.549649679088564	0.541036309793476	0.566866784964212	0.519516269788063	0.541513644996313	0.525911270861274	0.544638952418309	0.531083614213473
Heptadecanoate (1TMS) [MP-1.1]	0.507619365586081	0.464255242605332	0.554032654133196	0.479273508899825	0.471033171263281	0.490409515096342	0.470299739939536	0.570136907941723	0.479667386577698	0.545256528805702	0.459872081535243	0.47148026523606	0.483938513738848	0.48852369237044	0.437902706408693	0.459121489007565	0.521720797327945	0.598610027203383	0.470810055769586	0.538083962159978
Ribulose-5-phosphate_(1MEOX)_(5TMS)_BP_708146.5_TRUE	0.506100738241516	0.473566699208881	0.474931891753779	0.515242269166739	0.522333834536556	0.556369329771336	0.524760736710375	0.481704769752469	0.625798807330802	0.450475240533936	0.470664708982583	0.561842695045777	0.55124700458452	0.561403086442863	0.50427855358313	0.547905790172759	0.486324431981101	0.651646823907655	0.496809319630256	0.539838219231259
Arabinonic_acid_(5TMS)_546660.38_TRUE	0.505489346443558	0.471487755720324	0.539742771522298	0.608647786648665	0.525387859384104	0.509605085984325	0.526214504039901	0.549618758468736	0.516166877098789	0.51613558836137	0.474105326318204	0.518713995162503	0.517180933364704	0.514850353306719	0.593479377057041	0.520097282647871	0.54775747708657	0.504860181379454	0.497141767470484	0.531898461959899
Galactonic_acid_(6TMS)_626905.06_TRUE | Galacturonic_acid_(1MEOX)_(5TMS)_MP_624653.5_TRUE | Gluconic_acid_(6TMS)_627052.12_TRUE	0.505489346443558	0.52532040575196	0.48343148984961	0.592914099184146	0.53026961807745	0.569517024329264	0.525973085673855	0.46893426662188	0.492120612681667	0.497498225086038	0.509096837755335	0.553748771748183	0.568806595873801	0.552586606367227	0.61204291642643	0.47883772968326	0.540601845387482	0.540738818602267	0.563140493737049	0.498536637368339
Uridine_(4TMS)_863220.75_TRUE	0.505489346443558	0.47245044781993	0.506981336412354	0.4924879798198	0.531069747619925	0.455120182446268	0.507605367406693	0.446006576359511	0.492936299558218	0.508680113024503	0.502687806157734	0.466945985434736	0.496287906781359	0.491930491126592	0.499385544211038	0.50678569463317	0.518873256803107	0.518763752252753	0.506488862634217	0.501966537759242
Sarcosine_(2TMS)_233204.59_TRUE	0.497649147229053	0.480876393566113	0.529409303293808	0.479273508899825	0.466030721190723	0.472523787402202	0.484509091348193	0.507031044649077	0.510659744199383	0.470134531162641	0.522448660122367	0.491701564965073	0.479878466032623	0.483631164326724	0.487119140330593	0.488366567949982	0.540830273284101	0.437665102066763	0.49104732243818	0.473797109190668
1-Pyrroline-2-carboxylate	0.495059390175877	0.488902008199711	0.427262417187559	0.4924879798198	0.474039791889205	0.496649680461132	0.454399278093589	0.538399746127314	0.425478137093271	0.478377591728931	0.464277453062668	0.438192527705345	0.447199473290976	0.471481602815623	0.453594195243457	0.485133691981738	0.50583111008159	0.457625686338271	0.409651027213872	0.48026019908256
Galacturonic_acid_(1MEOX)_(5TMS)_BP_632938.19_TRUE | Glucuronic_acid_(1MEOX)_(5TMS)_BP_633533.94_PRED	0.495059390175877	0.504025573073498	0.512155350308606	0.486774346165939	0.529465693439944	0.461294646664405	0.49354816777686	0.492657744838452	0.495892988039856	0.487676582990669	0.499238477715676	0.491342569215271	0.476974802093872	0.501743040087407	0.503372575484531	0.491533685927812	0.524267053424844	0.515742212543316	0.513525824173256	0.480535682125398
Glyceric_acid-3-phosphate_(4TMS)_606948.88_PRED	0.490762238495591	0.61164881872236	0.704329684535055	0.433098031072925	0.613830415693964	0.525099738218123	0.57376614037776	0.814150325659811	0.677258751528093	0.667177583689643	0.638902222071058	0.3740073957394	0.419888057210285	0.67305969834576	0.573223128366331	0.479967441524511	0.442736659327119	0.338229356751166	0.510199622889165	0.721826523590334
Calystegine_B2_(1MEOX)_(4TMS)_BP_612263_PRED | Calystegine_B3_(1MEOX)_(4TMS)_MP_614672.38_PRED	0.490091077076774	0.466092603343049	0.408457670886049	0.483196171328616	0.431017290465647	0.48567971159378	0.433918469732343	0.386179833978723	0.430312619981247	0.469327301210952	0.454187912758062	0.488806984699591	0.494794623160679	0.477116734001648	0.45929919167989	0.45739613877045	0.492578519176375	0.453631416728788	0.452945365501369	0.463157946286717
Adipic_acid,_2-amino-_(3TMS)_553368.06_TRUE | Adipat, 2-Amino-	0.488061032090066	0.534762793078579	0.525035125726473	0.570126282878515	0.582928043429531	0.532172162048024	0.504886897925984	0.513590509476997	0.511388617093573	0.484020373373248	0.528121655156689	0.494545136747452	0.511866972143384	0.499183631155333	0.551332077386317	0.53342830845129	0.547976113027492	0.531524002515782	0.532922419457111	0.504613538693792
Butanoic_acid,_2,4-dihydroxy-_(3TMS)_409079.97_PRED	0.481462409313793	0.474042844210811	0.44229229742837	0.422962308572122	0.493713304493352	0.430895969567415	0.468605883611429	0.429588093043058	0.402240812596812	0.453624085475193	0.39560929060787	0.427877929542298	0.470136172725819	0.431374858925773	0.45606444465085	0.420356244996415	0.412144802791205	0.516418765546131	0.505232203565007	0.487545268837563
Salicylaldehyde-beta-D-glucopyranoside_(1MEOX)_(4TMS)_MP_879215_TRUE | Trehalose,_alpha,alpha'-,_D-_(8TMS)_874876.56_PRED	0.481462409313793	0.397339084118362	0.426211771459074	0.424818936723273	0.40173962445963	0.364725608419927	0.382294480758944	0.345981007340955	0.414050793925727	0.385491633124821	0.440076595986031	0.44599433822429	0.485136994820323	0.40021212491843	0.4126134557478	0.407755078754656	0.411137319928575	0.467646496581216	0.378322457663076	0.389409967920874
Quinic_acid,_5-caffeoyl-,_trans-_(6TMS)_1052532.75_TRUE	0.476790321587516	0.3715028561162	0.43841191693875	0.559133949108822	0.474783186911248	0.540530981701561	0.384561392636224	0.461038983249782	0.449406622524138	0.477610248584721	0.447490130449624	0.576905831161264	0.513211853117398	0.487833695401432	0.529805909565306	0.503272060579731	0.527022803865766	0.477493919124977	0.446202633120469	0.472935609659789
Saccharopine_(5TMS)_855563.75_TRUE	0.476059633469894	0.207429641278534	0.49613773126415	0.496109541428496	0.417009836158484	0.425971849967742	0.418569882641485	0.46218852705399	0.488816771425255	0.421742070980498	0.421302234305017	0.389590140543649	0.400983778620971	0.525341438421842	0.475635412354424	0.476936469606109	0.443980973146974	0.414754596059939	0.385919089564844	0.467969191398857
Tetracosanoate (1TMS) [MP-1.1] | Tetracosanoate|Tetracosenoate, cis-15- (1TMS) [MP-1.1] | Tetracosenoate, cis-15- (1TMS) [MP-1.1]	0.474957489557853	0.400552606134523	0.506323418865678	0.456598206991125	0.495034900220892	0.488705121924918	0.460227569900544	0.5940855826677	0.524879797808409	0.491252606073225	0.473423135079231	0.47066527096337	0.470572128556674	0.494605525262616	0.443750330894267	0.472670140654606	0.513834639924622	0.524955768347511	0.443889166475078	0.499523720587574
Butanoic_acid,_4-amino-3-hydroxy-_(4TMS)_531278.19_TRUE	0.472356783247239	0.510150998520991	0.470517960103423	0.560750238781469	0.48866346345353	0.487846324781196	0.501005213351779	0.449116230708269	0.4764008540385	0.457149846991876	0.474105326318204	0.525252840937271	0.513546340258236	0.505508272366801	0.557901973388392	0.4493863650859	0.463433934324895	0.468567975063181	0.469627504042451	0.480535682125398
Octacosanoate (1TMS) [MP-1.1]	0.471606121809937	0.370335652811687	0.418118816029147	0.416487325484579	0.441715922847454	0.43150135048268	0.376488960301756	0.46276052970131	0.450463607313403	0.361479587163492	0.377929940905273	0.424650451497209	0.467051265450922	0.39418035975901	0.377201589272808	0.418696784184237	0.386650470343803	0.454136355933093	0.3634924384808	0.34367032004738
Tryptophan_(1TMS)_766366_PRED	0.470852024839217	0.439715953907233	0.511517108847245	0.510282040383631	0.531866117730169	0.533485820094256	0.412965485590687	0.510559450475221	0.483733049626397	0.513688111010059	0.480444164130437	0.451607722397237	0.46882123882511	0.557618550145777	0.470499697560183	0.52125284465456	0.526026088062847	0.521727613224241	0.532922419457111	0.400806214269094
Glutarate, 2-Oxo (1MEOX;2TMS) [MP-1.1] | Glutaric_acid,_2-oxo-_(1MEOX)_(2TMS)_MP_524574.81_TRUE	0.465474441243742	0.539777220681576	0.553283292028551	0.453219234204853	0.467972252080141	0.566594573866945	0.49354816777686	0.469485051207654	0.444746141505176	0.48947439742324	0.431412308801365	0.434145456077369	0.483938513738848	0.407733559666084	0.426010429215563	0.499677307178724	0.488225949087609	0.393928518249443	0.479963025934142	0.458832929847367
Glucoheptose_(1MEOX)_(6TMS)_BP_679981.19_PRED	0.463510533601788	0.380561079241892	0.41135637196118	0.365367174496206	0.436218344922775	0.376070166692488	0.423547257255933	0.366722849194969	0.397462552591595	0.428636696449344	0.454573247043001	0.458800825098069	0.406243945355803	0.402563632078193	0.399735071066981	0.470292823244084	0.435500535539165	0.435974319459342	0.448482521413622	0.412309193992822
Threose|Erythrose (brk) [BD-1.1]	0.452057892200068	0.490203313783322	0.559188067017055	0.435536777607653	0.524836659570467	0.522324277000854	0.518057657571131	0.61855992277441	0.709492304477561	0.539570814007575	0.463187503776802	0.417995136195205	0.462540046210972	0.525615809238298	0.468624316783868	0.564020287984713	0.533834414980078	0.482613130111881	0.511720269284189	0.520335139820883
Arginine_[-NH3]_(3TMS)_606298.12_TRUE | Citrulline [MP-1.1]	0.438374352184559	0.402257976121296	0.429344508749174	0.472794753723865	0.4496417519334	0.419604140750304	0.381149392793008	0.43433980588249	0.441811053361095	0.448188244878492	0.418429560068217	0.433117627615338	0.436819362321451	0.438549545412171	0.4194538095397	0.423083307094441	0.414141301148134	0.406756158156975	0.379028443327298	0.43501690099147
Cystathionine_(4TMS)_754589.12_TRUE	0.438374352184559	0.438351071649314	0.441330439154216	0.562509902719038	0.486254374057947	0.477637325553624	0.435586136322881	0.430958704967804	0.424658381936172	0.421742070980498	0.426896371119327	0.475097643876343	0.494794623160679	0.50014812977589	0.578205857628978	0.5263493046391	0.448061478319445	0.465318586881661	0.493785196469265	0.4531047193135
Levulinic_acid,_5-amino-_(1MEOX)_(3TMS)_BP_591715.44_TRUE	0.438374352184559	0.308012493160524	0.471733121048784	0.432394515218805	0.563648979212689	0.520211830620654	0.571573555646867	NA	0.71279975910243	0.700553568712635	0.689969756511871	0.422462370203385	0.383353309587416	0.435240655692564	0.390114293446989	0.849233839196947	0.390709229902293	0.715213868552673	0.78536475188634	0.756529312073378
Spermine_[+CO2]_(6TMS)_960617.88_TRUE	0.434650580128279	0.370042587679469	0.455662560605529	0.383922993820602	0.430536456686954	0.348616098673247	0.484818401685149	0.472754476360855	0.427913153012108	0.450020400302548	0.466435182776597	0.438691348884563	0.375727803127378	0.362388518141846	0.433252584539132	0.471486018858695	0.491346726872924	0.496263089471373	0.442954154512747	0.419959488754603
Isobutanoic_acid,_2-amino-_(2TMS)_228564.16_TRUE	0.433706337426692	0.20510989765524	0.303602717569975	0.284620955032059	0.454308959773751	0.382685045087313	0.263535056120587	0.481704769752469	0.31717865613661	0.424428459866167	0.296734047254887	0.471073282616848	0.285044932180137	0.362388518141846	0.441078277219713	0.624212183344833	0.588920723372565	0.583592500076162	0.567231951041999	0.364020521562117
Thymidine_(2TMS)_849645.31_PRED	0.433232179112432	0.399077033380887	0.337764841892111	0.412156774048457	0.428599363679144	0.423453970321577	0.408147221575828	0.471671320006271	0.431104720638588	0.402806994640078	0.41648518946588	0.41456163383489	0.384096530333045	0.429406991580743	0.410447767832353	0.428398200720606	0.443980973146974	0.46055537077252	0.419208129103435	0.394060927833046
Ergosterol_(1TMS)_1051145.12_PRED	0.432279749290001	0.34133780453408	0.419768388205485	0.518814205750066	0.410090761456488	0.521271410474849	0.364235698583226	0.473293595294445	0.421337853480568	0.428636696449344	0.422248369924103	0.552523492338305	0.460699874118854	0.488867597547985	0.501544893330327	0.483675027771304	0.474081951166235	0.469484017062294	0.418113479754572	0.453750843351575
Alanine,_beta-_(2TMS)_273369.53_TRUE	0.426940640332713	0.401285587789006	0.434942695266309	0.378132400307315	0.481687425620997	0.497464274628862	0.423547257255933	0.44220190500649	0.367204916504622	0.482534621707054	0.437097520289356	0.510628331619089	0.42166286667344	0.444972199236456	0.471614339631537	0.546443701817677	0.542646277616009	0.546406187454016	0.515310860948996	0.385594949170174
Phosphoenolpyruvic_acid_(3TMS)_528164.19_TRUE	0.425951028345922	0.556435718232525	0.619137226087911	0.434843695282826	0.538105857681801	0.442603406595866	0.526214504039901	0.710907143171842	0.600220629374848	0.620428366888448	0.586310469307862	0.30096495553572	0.366904260450064	0.607808257918715	0.506669415717798	0.394043634342379	0.381279216515877	0.281015009893668	0.431781361360805	0.666971630614452
Fructose-1,6-diphosphate_(1MEOX)_(7TMS)_BP_915966.25_PRED | Fructose-1,6-diphosphate_(1MEOX)_(7TMS)_MP_913507.62_PRED	0.424955436794234	0.485382047416776	0.507963483274752	0.492975512770687	0.538615613835411	0.514810156430795	0.545986125199288	0.528807620095962	0.526214261715098	0.441608557900233	0.454187912758062	0.433117627615338	0.446695927307785	0.501425305272369	0.480259376818021	0.552447192725226	0.443980973146974	0.437665102066763	0.512022640014465	0.551090486056812
Xylulose-5-phosphate_(1MEOX)_(5TMS)_MP_733445.94_PRED	0.419885193657547	0.402257976121296	0.419768388205485	0.434496049702592	0.410090761456488	0.432705536023441	0.456974192197088	0.430958704967804	0.435394326507833	0.416232759194844	0.423188907074806	0.457032385229494	0.474018272718458	0.434282776218492	0.444191315128735	0.451202260485316	0.451648693169869	0.4342649223575	0.445742657547647	0.416378723917883
Tetradecanoic_acid_(1TMS)_616607.75_PRED	0.418333189399596	0.389420004682213	0.478071831144324	0.407297985592874	0.425651571234519	0.448161679836607	0.386797977022452	0.435008394552963	0.436926837081761	0.439192808275408	0.409486246268851	0.400678399892399	0.382606671722899	0.498537443636568	0.410991977476633	0.469492249420068	0.450461693716136	0.535455064850431	0.436737026163621	0.434295005260114
Pinitol,_D-_(5TMS)_617547.62_PRED	0.40479767629145	0.393808615226248	0.322989842391975	0.372638024120484	0.353169420784477	0.36562629830759	0.357754957336741	0.316115516350895	0.302301722419447	0.349274881316171	0.340895177582313	0.336504886785441	0.411964854150903	0.368976164169357	0.371027986161565	0.363158477196752	0.381279216515877	0.340341888229721	0.311414572322431	0.366737823764819
Calystegine_A3_(1MEOX)_(3TMS)_BP_588253.69_PRED	0.400799596938943	0.319075120701558	0.38398116878859	0.393588001472507	0.534233020646079	0.507705900998946	0.580351069274692	NA	0.703727269101911	0.705285879369049	0.684810311805512	0.376954847964229	0.349519392734077	0.451583623172168	0.378541366321325	0.852079544383104	0.358529093759589	0.700152271180865	0.784833711671734	0.737189207394538
Glutamic_acid_(2TMS)_477506.88_PRED | Propane,_1,3-diamino-_(4TMS)_478361.56_TRUE	0.400220440277643	0.42743410698523	0.393176512085004	0.363766177858639	0.434815629661718	0.385896292404737	0.416257505674311	0.421855260652057	0.376275387128874	0.382762529801356	0.340106340654631	0.409270388557137	0.40231487992171	0.392326384805912	0.430395408961676	0.309649744767224	0.367353497154333	0.431373429700219	0.422980422981533	0.452456119698353
Benzylalcohol_(1TMS)_279072.84_PRED	0.399639240731474	0.353086966605513	0.452529823315429	0.382494450382798	0.423155299407963	0.479005044200045	0.409607337314835	0.478073637678673	0.395020300103983	0.4458687161897	0.355184016775884	0.44929249583907	0.42515533352415	0.452445207409895	0.4126134557478	0.394693786709745	0.465981325922109	0.428427066747399	0.438193743365742	0.496545034485573
Leucine,_cyclo-_(2TMS)_377176.62_TRUE	0.399055983837489	NA	0.387322359414848	0.433098031072925	0.428599363679144	0.454595136583076	0.372906347719886	0.517413321295134	0.400346145295987	0.354266907421721	0.396166034836234	0.371005104059323	0.396923730914746	0.477853563498852	0.400897522962859	0.418139677093475	0.427014294745327	0.387094075059976	0.311414572322431	0.369412196802556
Benzoic_acid,_3,4-dihydroxy-_(3TMS)_613892.19_TRUE	0.396702088083301	0.407977631140395	0.407871977714448	0.37615573354542	0.406244708096137	0.395923925308759	0.394398476257547	0.353518389160447	0.359447805855989	0.384132790950905	0.364947192172125	0.328819218867582	0.342008530436558	0.382726019086418	0.347703703273991	0.387388293743783	0.396890101918332	0.381562290625487	0.315689163868138	0.368880691523027
Norvaline,_DL-_(3TMS)_445436.62_PRED	0.396702088083301	0.398334386003333	0.390599415726292	0.380085464513791	0.472166913238411	0.366522132700578	0.46585950251748	0.385299937515937	0.360665297113956	0.371365045103609	0.364947192172125	0.412231361961996	0.415058156238254	0.404305242701635	0.410991977476633	0.36785364493698	0.415130466027356	0.501180656858139	0.481070538483539	0.454072982920652
Tyramine,_3-methoxy-_(3TMS)_699102.56_TRUE	0.387562782581497	0.338886644350326	0.395715285885321	0.363229010926178	0.392353487095051	0.362909449605377	0.269241486857455	0.402922534049186	0.39204087287083	0.36458558806834	0.335289295815494	0.308949479293322	0.404291295182906	0.471098902190491	0.404334457138434	0.395986003800358	0.383688289116971	0.449011512228898	0.289352180885982	0.376683191994365
Galactose,_2-amino-2-deoxy-,_D-_(1MEOX)_(5TMS)_662843.5_PRED	0.366897891908204	0.286357037065826	0.298112553449411	0.28021186910178	0.343794102460407	0.295073365886563	0.345416247276841	0.385299937515937	0.204825432041823	0.402806994640078	0.425516186053765	0.424650451497209	NA	0.406028423237226	0.305168335868351	0.337290651855328	0.357830113224471	0.338229356751166	0.348831713098738	0.430638614900587
Tetradecanoic_acid,_12-methyl-,_methyl_ester_607457.12_PRED | Tetradecanoic_acid,_13-methyl-,_methyl_ester_604072.19_PRED	0.366897891908204	0.265914974367685	0.326805183112395	0.354385387800273	0.284825207072461	0.299143207117285	0.235817543964504	0.358713470618365	0.33009120410901	0.279744696875077	0.304835179502576	0.293791840265765	0.312592771886885	0.353168751738084	0.279911562232713	0.309649744767224	0.326241616800459	0.288517371049539	0.254611807839632	0.362368954389323
Nonacosane,_n-_992849.81_PRED	0.362580529616024	0.435786660382918	0.407284268383377	0.600276834034588	0.430054254958257	0.49705747668408	0.373508806712154	0.512729741273414	0.42424696603103	0.461876558152496	0.425977580614874	0.447416096522631	0.427442603018347	0.491930491126592	0.507556748705154	0.547176462067666	0.49681802261324	0.483032209093645	0.511720269284189	0.346123758534289
Glucose-6-phosphate_(1MEOX)_(6TMS)_BP_781714.75_PRED	0.361849841498401	0.310116530394657	0.291282466990668	0.334479762853523	0.309155731076567	0.356391873961917	0.408147221575828	0.273735772991515	0.361873836149353	0.35670675519441	0.393362605646748	0.346508391983188	0.363572995955852	0.284352746590111	0.352494759180566	0.368622591021941	0.36669137979396	0.395407278650493	0.335473962977007	0.331504778646293
Allantoin_(4TMS)_643191.62_PRED	0.36111589863455	0.212721635619971	0.362432094649205	0.390884350100078	0.313052311726997	0.253114408365734	0.207514927304164	0.384415674303445	0.317966957735431	0.354266907421721	0.262042574253335	0.287560621194674	0.253515267260919	0.333890235072089	0.212667369610924	0.543227945819739	0.38840231226631	0.370734888083017	0.288100528479696	0.377190791452541
Ornithine_(3TMS)_587245.62_PRED	0.36111589863455	0.222130387997168	0.450713536057125	0.366425865466813	0.507713241570977	0.478094483689145	0.525003910846973	0.463330701937029	0.641902922929681	0.640450716248023	0.629710346276385	0.407467369542795	0.354043179667371	0.392326384805912	0.335925394183033	0.78896125249185	0.363339892307845	0.644564940556683	0.72841862576557	0.67889487774712
Butyric_acid,_2,4-diamino-,_DL-_(5TMS)_500761.19_PRED	0.352819093824638	0.31219468705535	0.443248767112498	0.38580851537913	0.311115218719187	0.36918101946378	0.361026728865936	0.362763160203524	0.380629564098527	0.307084073429518	0.444237836636737	0.477464950727794	0.457899917696966	0.36534930954528	0.497196292176535	0.465426450136673	0.452435257128336	0.383163012725326	0.371821603931849	0.350333531589927
Methionine sulfoxide [MP-1.1]	0.350481892928409	0.346473519292693	0.387322359414848	0.436226935525789	0.368423261129708	0.345603746505189	0.216980597966427	0.342650467911176	0.36005767879427	0.362261651575009	0.314413396957484	0.321780223447138	0.40231487992171	0.378044492196396	0.30303191490269	0.290607879824573	0.377597593371415	0.321396789320691	0.407315199104189	0.401685615168621
Hippuric_acid_(2TMS)_643255.94_TRUE	0.345705619362115	0.30459056339996	0.305750285409318	0.290600578017357	0.355434404957318	0.367413163668917	0.335902221126934	0.393909277428435	0.305726024782497	0.327621888002197	0.324322857181133	0.281079086367466	0.287751552325606	0.354742088045588	0.316428888370453	0.366304266325049	0.384285041904241	0.375826120212563	0.375466350873898	0.35788434001212
Methionine_(1TMS)_416320.09_PRED	0.331368763433319	0.375241521150274	0.374262238205554	0.368001163523491	0.463671140717157	0.395173689824726	0.331321600633874	0.513160645163274	0.328623689285869	0.3295402644493	0.339313569361911	0.392931223102828	0.342008530436558	0.42024487922097	0.449389353083029	0.391415533714875	0.474425193575587	0.343457752024335	0.404944111882758	0.312558833387515
Eicosatetraenoic_acid,_5,8,11,14-(Z,Z,Z,Z)-_(1TMS)_835936.56_TRUE	0.32870396302465	0.276444986422339	0.387322359414848	0.341387657068812	0.47917636053296	0.379410517905275	0.289306304277103	0.312170439954006	0.459017075616086	0.301518341409668	0.296734047254887	0.407467369542795	0.36188138222784	0.302591542888039	0.265588850308155	0.341911503275919	0.372555904301505	0.315354444456111	0.34005392430994	0.368880691523027
Guanidine (3TMS)	0.326903181160522	0.290164567362046	0.35054357678661	0.311073160841724	0.420621712721844	0.408879330831952	0.292265358328666	0.443479176939284	0.322618982470169	0.413975835729105	0.252729013404126	0.336504886785441	0.352248758653021	0.380067363440291	0.283602611108358	0.36785364493698	0.435064722982507	0.39904371344231	0.385919089564844	0.426144077645746
Asparagine_(4TMS)_BP1_479623.44_TRUE	0.324164560213067	0.313839001799468	0.304679878190901	0.418801994072195	0.308167426274562	0.340458540535194	0.332862461213589	0.339256485834611	0.294325790400811	0.242059592562683	0.362218364383778	0.372513232073737	0.363572995955852	0.312018942815903	0.442864654933304	0.298024103618624	0.315708174695655	0.375826120212563	0.33171135084848	0.272541926346184
Tetradecane-1,14-dioic_acid_(2TMS)_801298.94_PRED	0.320440788156787	0.25641765076301	0.237058171433787	0.323880610442946	0.345393112369912	0.342535778551062	0.379996407606298	0.326227657821817	0.409157425062934	0.310334548848037	0.264606344586879	0.288826263157037	0.285044932180137	0.366081171635835	0.339381110911267	0.340079584902033	0.30637925248961	0.367245557677839	0.332660486943885	0.401246485759045
Tyramine	0.320440788156787	0.20275785958129	0.216749578541769	0.230452871272298	0.239443607043699	0.269914245390474	0.26237001872687	0.312170439954006	0.267774256271388	0.217466394482327	0.199520461793994	0.305575798443601	0.314880041381082	0.20709246417792	0.249838095213821	0.202835134490892	0.21140284459413	0.322577545341587	0.263676719581321	0.258835135883596
Lyxonic_acid_(5TMS)_539863.25_TRUE	0.316630909739074	0.364375528392407	0.258051349625535	0.327936202928726	0.343794102460407	0.339410102499308	0.338146311054901	0.321243314024912	0.218342132602729	0.260538981273814	0.248564138066417	0.342038063927073	0.403635159140945	0.345065635240663	0.367491088185284	0.310765959337564	0.359225093558426	0.330600589616685	0.301348966456532	0.305741094867131
Acetonitrile, 3-Indolyl- (1TMS) [MP-1.1]	0.315664514590492	0.266998003758095	0.293589656048806	0.216550770796281	0.260395405347473	0.238333392881837	0.190440694711337	0.305394769122891	0.304022791216318	0.257600881654325	0.150569050980375	0.230185927191711	0.261596210448743	0.285554516185246	0.23065182412769	0.205043841959909	0.202578441199386	0.219588735391282	0.164750285858178	0.290377806693094
Butanoate, 2-Oxo- (1MEOX;1TMS) [MP-1.1]	0.315664514590492	0.188773315742541	0.334189226553188	0.165939475946512	0.359875544448281	0.357338753318433	0.256419846600516	0.305394769122891	0.274056316531058	0.282312625808405	0.131194626113657	0.348262414937344	0.326914690611895	0.29821976243752	0.19237123849857	0.320467375873934	0.328772081527263	0.330600589616685	0.308130517951895	0.330839613576483
Gluconate 6-P (7TMS) [MP-1.1] | Gluconic_acid-6-phosphate_(7TMS)_802294.06_TRUE	0.310745644822742	0.29843017240309	0.291282466990668	0.355517345147883	0.415438012281896	0.397414310881439	0.429675039150412	0.379927309229491	0.441440454402989	0.288560904313446	0.279176873049997	0.354255568772759	0.402976361282197	0.39418035975901	0.424521318561838	0.398538704671245	0.347716418557602	0.417331728558659	0.379028443327298	0.461933461436417
Alanine (3TMS) [MP-2.1]	0.297223810673592	0.329457691046168	0.2537650309731	0.26524672462768	0.124907254528367	0.242153719234665	0.207514927304164	0.191306128392383	0.327884988859118	0.181553905177101	0.323447095656134	0.163847500732051	0.290413799644932	0.261050342439303	0.25574879280837	0.205043841959909	0.23680728673769	0.242869742413409	0.207859249826036	0.272541926346184
Xylulose-5-phosphate_(1MEOX)_(5TMS)_BP_716367.62_PRED | Ribulose-5-phosphate_(1MEOX)_(5TMS)_MP_715032.12_TRUE	0.286010648306151	0.226302254436607	0.27290674912343	0.313278594486287	0.29041956946419	0.314493517017019	0.266982233699743	0.301202136351873	0.444017268610987	0.261988414081678	0.174698664497895	0.419684874388481	0.366077828898184	0.400803192866992	0.26004116721421	0.362361998397412	0.197045311131568	0.200154820841564	0.199249887310726	0.2734797918612
Spermidine (5TMS) [MP-1.1]	0.280104284740644	0.191326795173963	0.307871174696832	0.38580851537913	0.256407132082788	0.0687731389497487	0.260015301075809	0.360749820458524	0.249744079890873	0.235403153350846	0.260745013458311	0.287560621194674	0.196537743398911	0.304734192762596	0.204858733310582	0.510221789776139	NA	0.226292021032347	0.335473962977007	0.240545409976738
Cinnamic_acid,_4-hydroxy-,_cis-_(2TMS)_604876.38_PRED	0.272725294991846	0.315061820211215	0.373546390649133	0.288914303454201	0.348546576230766	0.269914245390474	0.298972706730527	0.360749820458524	0.362474789536523	0.344125186475495	0.364947192172125	0.311160041573944	0.300646692851594	0.280693288293677	0.296443763914243	0.312974666806581	0.344707822666433	0.353414282130372	0.330756444893357	0.334139606816519
Sedoheptulose,_2,7-anhydro-,_beta-_(4TMS)_647067.94_TRUE	0.272725294991846	0.391499440240822	0.38532550165628	0.335757637977584	0.467585721027065	0.444849074249827	0.412965485590687	0.421855260652057	0.376826009313143	0.409366055457128	0.386425491009664	0.347387786655359	0.425730178193299	0.42180814602094	0.386350002621668	0.490485121253151	0.487277959749687	0.44044279096537	0.488260880489261	0.396791378840948
Lactulose_(1MEOX)_(8TMS)_MP_858297.25_TRUE	0.265000291208292	0.15779811091234	0.240219917201076	0.212544843622038	0.201250055002861	0.224225068415539	0.224478813815379	0.177698092485174	0.246131614292292	0.243682094678029	0.191669467790848	0.226518302885386	0.222576339440793	0.197099203800221	0.220108401628678	0.229359827008656	0.287035629612658	0.352446872966669	0.194761537796355	0.241677750603154
Cyclopropanecarboxylic_acid,_1-amino-_(3TMS)_396111.84_TRUE	0.237833912655155	0.239508349636257	0.149312525783575	0.204226075536201	0.234923504684634	0.285170537252363	0.184958820340582	0.268716323555325	0.188375657917469	0.26484919126999	0.275657534124177	0.206814771050635	0.222576339440793	0.24497245566457	0.161366898845865	0.181405935545441	0.230817194060139	0.219588735391282	0.177958191891589	0.314771731466693
Glutamine (4TMS) [MP-2.1]	0.233103351365613	0.17352592466234	0.222057655571793	0.174688469515872	-0.0246522348051826	0.273079614951901	0.264692030907208	0.261795893649238	0.14051435112162	0.111854834012235	0.105708111425645	0.179476014103005	0.248466359580761	0.152301647829125	0.051785358000755	0.24368820620272	0.275852372294484	NA	0.1051394694373	0.209453854357393
Spermine (6TMS) [MP-1.1]	0.21269338918903	0.208195864842886	0.211271160105368	0.245490828479968	0.234923504684634	0.295073365886563	0.102625523316358	0.272078285024092	0.312367759467845	0.192961360836249	0.232285240724433	0.342942091630324	0.310272826010575	0.252477887361644	0.196644275524953	0.515685903601328	0.20075482775279	0.282544762843882	0.265137953801053	0.196698378186261
Spermidine_(5TMS)_724912.5_TRUE	0.203381877927004	0.188773315742541	0.352988430862193	0.33058512209923	0.230279548616501	0.261726536317482	0.307218979352505	0.372502123542171	0.280107082074336	0.246879454321224	0.203305171896883	0.26727849955763	0.368544612270677	0.233847415490534	0.26422007339795	0.500337101664927	0.293395331793145	0.39243553878032	0.159139634227357	0.331504778646293
Fructose-2,6-diphosphate_(7TMS)_914781.75_PRED | Fructose-2,6-diphosphate_(7TMS)_912183.75_PRED	0.19553420903412	0.372372997128111	0.42409088217156	0.4924879798198	0.523172222692707	0.534138775266203	0.526455574289942	0.501144047339029	0.546407841643384	0.351789997255604	0.319894985496523	0.214987075413839	0.343919063643062	0.486793186806574	0.442864654933304	0.569182460148943	0.299516488139372	0.295673875893469	0.470416860205398	0.56333745758449
Gluconic_acid,_2-oxo-_(1MEOX)_(5TMS)_BP_593592.06_TRUE	0.187293997012158	0.0545295662495173	0.13829390330371	0.174688469515872	0.130653357121204	0.154729211306706	0.169395759596915	0.233149534773451	0.216894012501222	0.0885207936731703	0.112472975530686	0.161088997269664	0.140952705623654	0.192923614989149	0.0569691911169466	0.302779015543204	0.154411883995768	0.312870092759963	0.272246929168743	0.147506930481426
Sucrose_(8TMS)_841296.94_TRUE	0.187293997012158	0.0808446064930254	0.23055340784803	0.260274694886165	0.203102464624789	0.224225068415539	0.169395759596915	0.193907323080436	0.193485724476614	0.237092910619641	0.170156917956098	0.193723661708239	0.226537351651061	0.237104304877257	0.14761103136347	0.188881511833356	0.17282142896706	0.221855471538866	0.217997060494804	0.119763290886307
Glycylglycine_(4TMS)_591933.56_TRUE	0.180831604008422	NA	0.222057655571793	0.224279792103684	0.208541234779266	0.269914245390474	0.27147061574112	0.361759334046357	0.314790809271989	0.30598602135263	0.311600043607618	0.228362534650043	0.191761121118128	0.201170391876163	0.0849406525419586	0.470691571901853	0.198910608068492	0.366360833526377	0.397608231993048	0.361258889477455
Spermine_(6TMS)_883354.38_TRUE	0.154698268967698	0.0487363584890415	0.23055340784803	0.15088820381483	0.213810896318212	0.175716308223544	0.161034907990645	0.286468236268925	0.210970468059888	0.181553905177101	0.0874178052449451	0.127153937756068	0.232303405268616	0.24497245566457	0.115886450166388	0.474623883547908	0.156829879413773	0.168709148017311	0.194761537796355	0.153311532024546
Cinnamic_acid,_3-hydroxy-,_cis-_(2TMS)_599148.38_TRUE	0.144064263261558	0.190479916175907	0.146623818372071	0.208438338802749	0.163893611876288	0.23243300226522	0.221519759763816	0.312170439954006	0.210970468059888	NA	0.160664526807105	0.210952652204351	0.220559003567194	0.205142272712532	0.135673835077681	0.337290651855328	0.21140284459413	0.26482654164582	0.321890556525203	0.24613285752125

## Sheet: HR
Table includes multiple worksheets – one for each tissue
hum - humanized mice
wt - wild type
number - animal ID
Metabolites	hum_220_hea	hum_300_hea	hum_319_hea	hum_323_hea	hum_324_hea	hum_333_hea	Wt_352_hea	hum_362_hea	hum_363_hea	Wt_424_hea	Wt_426_hea	hum_429_hea	hum_436_hea	Wt_626_hea	Wt_628_hea	Wt_629_hea	Wt_630_hea	Wt_632_hea	Wt_634_hea
Orthophosphate | Phosphoric_acid_(3TMS)_333095_TRUE	1.8830129920082	1.84621317007356	1.98863743227746	1.92131089331582	1.95253991425177	1.77101352954512	2.00479759004481	2.05424917207174	1.95096309710084	1.91639530035959	1.79526201031316	1.82140068598912	1.83055464965048	1.77064204429704	1.82069626160666	2.08237485177269	1.90103130399577	1.85999572931512	1.9251633652362
Glucuronic_acid-3,6-lactone_(1MEOX)_(3TMS)_MP_657311_TRUE | Inositol, myo- (6TMS) [MP-1.1]	1.28963496558919	1.38391833538705	1.3479742416549	1.34778895043374	1.3368399508263	1.30919168508777	1.31533344016723	1.39810021848039	1.35563414470854	1.3203782424175	1.36241558388145	1.26538406080269	1.33594721972399	1.33733370420352	1.32223756452944	1.37742738699412	1.39193126890341	1.37068469624685	1.32222779267184
Cinnamic_acid,_3-methoxy-,_trans-_(1TMS)_649428.75_TRUE | Inositol,_myo-_(6TMS)_654785.31_TRUE	1.20054094593142	1.2942294420234	1.25419123412531	1.25294510516843	1.23913311817993	1.22386673439683	1.21450037711691	1.29741204912344	1.26116219815224	1.23262968401118	1.27890561868639	1.17539078856984	1.24744268514384	1.24969042550462	1.23724884105642	1.269031141724	1.30202956144439	1.28385498171195	1.23158486334107
Glutamate (3TMS) [MP-1.1] | Glutamic_acid_(3TMS)_509813.31_PRED	1.70273648444055	1.7239764394663	1.78439896338959	1.74621724965621	1.78319764963345	1.62384832010336	1.76889712499534	1.77904482739171	1.73149273181398	1.71202190211958	1.66431112973726	1.66962200045816	1.69071151623724	1.64180661620043	1.63228939427284	1.82111155021916	1.65253012855776	1.70765549644467	1.67363906499873
Galactaric_acid_(6TMS)_658294.38_TRUE	1.18373470165839	1.28046420989379	1.23588232638267	1.23676734823588	1.21902506888484	1.20703249161539	1.2024047573279	1.28452091180249	1.23845507202136	1.21642236636593	1.26527323178912	1.16068783851162	1.23602697413454	1.23476671902622	1.22319813363126	1.25113428495383	1.28832794158555	1.27138250307798	1.21939147785639
Pyroglutamate (2TMS) [MP-1.1] | Pyroglutamic_acid_(2TMS)_507313.84_TRUE	1.62516656012727	1.65011871522596	1.70346922549237	1.67211843013224	1.70083430286595	1.55628739037858	1.69044484824586	1.70304239409822	1.65305162358812	1.64516878794725	1.59296636968374	1.59049675234856	1.61086313613871	1.56656702513157	1.55646399519839	1.74318813621788	1.57545122999612	1.62479993944909	1.59403124339477
Arginine [MP-1.1] | Creatinine_(3TMS)_489565_TRUE	1.46186006200552	1.46439786691724	1.43357083396201	1.47800805758238	1.49762193850185	1.41377715634752	1.50014987587925	1.51799754680053	1.4667354096518	1.53533332833845	1.45026225530046	1.45678348593467	1.36854756426514	1.38344683566851	1.4224039199482	1.57775388863689	1.40150901381899	1.4638165284664	1.50600212441955
Butanoate, 4-Amino- (3TMS) [MP-1.1]	0.608570173099301	0.698330836193077	0.619149919925065	0.573706172245176	0.558011283809216	0.545917788749617	0.622209387398125	0.583849280741748	0.538102870673516	0.555299587343995	0.604087012626527	0.543912287763339	0.58846538201814	0.56101346416531	0.56824092313813	0.491855662280271	0.589200850319105	0.543916564360818	0.594931152343257
Asparagine (3TMS) [MP-1.1] | Aspartic_acid_(4TMS)_550990.62_TRUE | Caproic_acid,_6-amino-_(3TMS)_546902.25_TRUE	1.70929324127686	1.60262703508388	1.82179839544841	1.70126274050796	1.74836872162074	1.56755211625144	1.81478237552877	1.85688499175328	1.76902109542737	1.71335802767818	1.55933135051202	1.60157149011524	1.58717914281305	1.54636400850913	1.60485064298673	1.91413500797143	1.72176078065913	1.65148571923684	1.73603602942669
Ascorbate, 1-Dehydro- (dimer;2MEOX) [MP-1.1] | Dehydroascorbic_acid_dimer_(2MEOX)_MP_625466.25_TRUE	1.05625606111122	1.19034505846104	1	1.07470693717661	0.933467500880963	1.17732990719448	0.952745952896945	1.10066460427751	0.856640322863596	1.11721960775602	1.14187262030823	1.13207969368519	1.01996795681859	1.15167308685521	1.12708467107357	0.932002504641348	1.09772063471894	1.09234845320823	0.975109298062348
Ethanolamine_(3TMS)_321815.91_PRED | Glycine (3TMS) [MP-1.1] | Glycine_(3TMS)_326251.06_TRUE	1.51677132575785	1.57189337429016	1.61865979058592	1.63217446456734	1.62847617725789	1.48184729017609	1.62539610755019	1.65276713919901	1.53912300401131	1.58373718645059	1.54386801316271	1.47359397127313	1.57975517467692	1.49321612555587	1.47145850666139	1.619320994233	1.5872797709172	1.52524437573481	1.57735071188338
Aspartate (3TMS) [MP-1.1] | Aspartic_acid_(3TMS)_458039.69_TRUE	1.67760605907495	1.62415768049009	1.71174954680627	1.74201805053003	1.7171262240369	1.61062544752352	1.8191170789128	1.64869246482153	1.79017605998336	1.68727330977235	1.62111909686031	1.65979043014646	1.75228575988447	1.67116415696456	1.7146484502887	1.5947484315555	1.67822181307295	1.69843988806208	1.74866304044095
Butanoic_acid,_4-amino-_(3TMS)_452983.28_TRUE	1.6655710833795	1.61150312706993	1.70327539801393	1.72514406290931	1.70099143305045	1.59439102473915	1.80386376990183	1.6455056923947	1.77304730628513	1.67261041499149	1.59962148435576	1.64037768308507	1.69977501452626	1.64117618091838	1.68003164892077	1.60164448986159	1.66515549512999	1.68155323055784	1.73139801886985
Phenethylamine_(2TMS)_490740.62_TRUE	1.32387493691935	1.32842886347881	1.2782510316681	1.3322288015519	1.34953702383824	1.28184974936559	1.35003681730055	1.36189298250124	1.31140733779366	1.38513355908743	1.31471002744927	1.31906208671474	1.22735541346539	1.25282000500812	1.28554896857223	1.41805246878701	1.26350242635181	1.32651531495668	1.3600734848812
Hypotaurine_(3TMS)_509415.53_TRUE	1.52907546050286	1.51456223940832	1.63655724524995	1.54328273606555	1.58432475251801	1.44492449950281	1.74955467615934	1.58998181280335	1.59831094008161	1.52630702201294	1.45543717962053	1.46382229120495	1.50529949042982	1.45101209787084	1.43248639429142	1.59313314144716	1.46413812376941	1.49078745729811	1.49399695605031
Asparagine_(3TMS)_550488.31_TRUE	1.54642150094766	1.47219990946287	1.64531714852387	1.5732998023102	1.60846568015961	1.44827228337062	1.63303478274668	1.68147382911195	1.60482372475979	1.58017894317378	1.44154782961625	1.46207405022226	1.45701129951685	NA	1.49146123979894	1.72131977636551	1.56719737950289	1.5204850836886	1.57910023371158
Oxalic_acid_(2TMS)_236929.91_PRED	1.34151410070674	1.24949467184013	1.33457708564068	1.25684273874642	1.28693410088723	1.33736540811515	1.40577737278509	1.26574302793687	1.46773539043345	1.28013936837874	1.32237512970845	1.41892577807389	1.28662792496867	1.39040648724542	1.27727438412144	1.26120022970962	1.24124387577501	1.41964678171975	1.31013041225826
Benzoic_acid,_4-amino-_(2TMS)_650574.94_TRUE	0.89630479731126	1.00939297223998	0.937559505278546	0.943512793989887	0.916234938162676	0.94696218944422	0.894181138800141	0.98191943690011	0.935871224873265	0.925544760922738	1.00078656281146	0.891709716273787	0.954680269235098	0.973628704564132	0.960464717297181	0.934859308504063	1.00278303344444	0.989887929601258	0.923046506873459
Ethanolamine [MP-1.1]	1.06041968290231	1.09726489571241	1.11682781064731	1.12861428084521	1.1340751546669	1.01576216487815	1.06655683728109	1.20740489694856	0.990538916997471	1.05006700388901	1.06706141467382	0.982028448431251	1.06613066270188	1.04854469977091	0.932944718161298	1.20918019216439	1.15578011162035	1.06630125591513	1.04657517831159
Cinnamic_acid,_3-hydroxy-,_trans-_(2TMS)_653564.75_TRUE	0.877520120859497	0.978305544595051	0.897024257717002	0.925619880171216	0.886817215178355	0.917377845898145	0.875490933475334	0.938198797335267	0.90655758978198	0.894366429124189	0.971800958658017	0.866976509495454	0.926033779076923	0.949515709003971	0.938133118454065	0.90442069598048	0.987134418733014	0.960850645085905	0.900609585238512
Alanine (2TMS) [MP-1.1] | Alanine_(2TMS)_207563.2_TRUE	1.66502187300193	1.70428894042574	1.75730200187047	1.74557732093116	1.78212474675825	1.60770023758211	1.77779071757981	1.73332822146482	1.76615470728253	1.74715468330626	1.65879931817253	1.67272094376909	1.71264228309003	1.6462858430464	1.66046700299359	1.78257052254539	1.70210494576949	1.69572688735963	1.76810004190564
Nonan-1-ol,_n-_(1TMS)_336924.19_PRED	1.45843595672735	1.47747605403692	1.54046366766008	1.463481444112	1.47616522860084	1.36617702416509	1.56174311396341	1.5994465262454	1.49573831492111	1.45704062883233	1.4262184828872	1.39836787812707	1.41059356881918	1.38242246079151	1.39656895434084	1.61524580309897	1.46474131312693	1.41443470669199	1.47221379319184
Serine (3TMS) [MP-1.1] | Serine_(3TMS)_356866_TRUE	1.55365956492626	1.62382071605145	1.63535496979235	1.67926837106478	1.65983529733586	1.51781613462389	1.65410533572581	1.55248289825613	1.59953626483131	1.67409568251367	1.59987135520977	1.59036665256955	1.56810140893569	1.51970961390497	1.55412489363502	1.6727417888975	1.52668647541709	1.58312306990465	1.60417438135951
Proline [MP-1.1] | Proline_(2TMS)_340374.03_PRED	1.60281041655093	1.56892812917335	1.63590523195909	1.63461535837428	1.63523241896728	1.47738449933261	1.68363793522572	1.53862264028852	1.61119306212204	1.58683745417832	1.53270053006803	1.55403626334469	1.61269938775117	1.50166447287953	1.5248970506024	1.61590373366578	1.5136277261072	1.55568484358345	1.57662897094226
Succinic_acid_(2TMS)_365265.25_TRUE	1.13046466031154	1.43977692146095	1.29820344558447	1.3187150030025	1.33504542999576	1.38547542308052	1.36470419431367	1.38909153006958	1.31918221850546	1.40728352039967	1.34352832854697	1.37451227857545	1.35818094707983	1.42876141757278	1.42298670729996	1.33382215708906	1.24252858345332	1.26572931860504	1.335208877915
Alanine_(3TMS)_355868.03_PRED | Pyruvic_acid,_3-hydroxy-_(1MEOX)_(2TMS)_BP_355231.75_PRED	1.5028900828544	1.57178712896522	1.57848792854699	1.61604238014541	1.59495666324294	1.46120875180388	1.59549530053138	1.5022498256305	1.53554729493415	1.61580219261051	1.54045738754734	1.5322158932305	1.50730904874659	1.46636921635262	1.49241437771307	1.61414546963333	1.47025442879811	1.52492604667518	1.54496595018624
Homoserine_(4TMS)_510930.09_TRUE	1.3394388629104	1.35791161478528	1.39140450205707	1.3671034634619	1.39435793699519	1.28310038186387	1.38335970532002	1.38669107162482	1.33814743530924	1.33920935963341	1.31446461825501	1.31906019823359	1.32938718818335	1.29901574072509	1.28560370406412	1.41187723948465	1.28626017767389	1.342751047777	1.29759559136429
Glutamine [MP-1.1] | Glutamine,_DL-_(3TMS)_599684.19_PRED	1.20991914904461	1.01738269091964	1.2384243164348	1.09369731464583	1.28113930388664	1.10782365172439	1.21779282220756	1.30076117209838	1.25324895186143	1.31771754553126	1.04585319578838	1.32309390795406	1.0685280515543	1.00618739474396	1.10591738984008	1.31996724945732	1.16742631141995	1.13822218441208	1.14897086467308
Adenine_(1TMS)_586048_PRED	1.33572192027551	1.30677187982661	1.42761547263754	1.36931265607487	1.42066925834138	1.22628494030808	1.42050793109886	1.43563354274275	1.41563384911626	1.35546505358247	1.25132837115664	1.26826990770617	1.29649563511315	1.23957730461217	1.23204857355276	1.49632684827029	1.31639736628186	1.2902436546085	1.36071126903858
Nonadecanoic_acid_methyl_ester_324789.09_PRED	1.42535242059513	1.34045404239554	1.55829931994735	1.40908526116225	1.45310555393593	1.28296919691481	1.56042190799139	1.58102475841238	1.45780990079466	1.43906896687756	1.30787094070127	1.33499604927639	1.34472460346022	1.29473320215689	1.35864514912448	1.64219135316223	1.43326282464955	1.36857468473324	1.45076697072636
Indole-3-ethanol,_1H-_(2TMS)_652683.19_PRED	0.797001085381075	0.897179051947117	0.831430303905144	0.856921216026827	0.821096395667402	0.850699368383699	0.780831226760787	0.887442619700618	0.830572782322676	0.827202423068742	0.908073885315254	0.798816045389636	0.860688713334048	0.875834393272286	0.869755386020884	0.826782427824177	0.908854299642248	0.884908671112996	0.834467258761199
Pantothenic_acid,_D-_(4TMS)_624853.5_PRED	0.825883468285796	0.923364491128519	0.775247500898648	0.830907889551384	0.783709974196449	0.924976350485247	0.760119162148068	0.832045416695298	0.716853461362109	0.859573444449439	0.902148929433421	0.891169159995013	0.850224157297193	0.906903166763498	0.87233608324103	0.726300385131707	0.865649198641462	0.838589550874402	0.759262515033615
Butyric_acid,_3-amino-,_DL-_(2TMS)_281258.31_PRED	0.935945435161998	0.968888089123789	0.971831869296209	0.997466259663829	1.00195044678788	0.892833272462327	0.933166484820581	1.06858960503599	0.853972545438993	0.932584246127994	0.952434934956025	0.859110831138441	0.938757220490875	0.932166112169349	0.819774924182805	1.09144502068039	1.02991018918373	0.946810124345487	0.920305967034894
Glycylglycine_(3TMS)_628479.25_TRUE	0.730102808409022	0.856920470125809	0.645311545296345	0.744128095343364	NA	0.870738915056399	0.584663651888553	0.73256373260844	0.520870538126812	0.775854808627119	0.834968911312917	0.815124639828723	0.701020309586175	0.840701041558967	0.819116644018469	0.567007273200098	0.785037555379199	0.762333119759368	0.640164189078602
Threonine (3TMS) [MP-1.1] | Threonine,_allo-_(3TMS)_370722.56_PRED | Threonine_(3TMS)_370274.69_PRED	1.29219243653709	1.29906799399195	1.37606499396423	1.32102095660446	1.30134287234834	1.24485202522679	1.42018814123249	1.25731439112829	1.34259631935884	1.31545354664423	1.28571357932723	1.28523407911818	1.31210777228954	1.29191494526887	1.29077006181017	1.31418366874855	1.26239967628197	1.30156969334648	1.30129036544366
Aspartic_acid_(2TMS)_458076.97_TRUE | Threonate (4TMS) [MP-1.1] | Threonic_acid_(4TMS)_458765.47_TRUE	1.42030914489705	1.37546913655476	1.44036008894596	1.47376465804578	1.43951562470763	1.37074545098138	1.5422469039157	1.38530728482417	1.51256941106899	1.4200480341436	1.37616982286086	1.40768690916717	1.47476782503888	1.42143385910624	1.45792508511028	1.32757374036785	1.42403871172075	1.44547864013456	1.48272962175361
Inosine_(4TMS)_904803.88_TRUE	1.15401610089208	1.16334729408735	1.09794093634814	1.12173952603119	1.10726524931671	1.01169155333342	0.94392897112379	1.09116187172114	0.989280617688643	1.0935762764992	1.15153547924434	1.07339552880976	1.0957501893138	1.09538928527815	0.935527771024156	1.0183690855333	1.14208750752954	1.0655641187063	1.0836803747924
Dehydroascorbic_acid_(2MEOX)_BP_639171.94_PRED	0.764084063582171	0.911430054780841	0.706542395422097	0.792819017848855	0.659684574438761	0.899295972919405	0.680508697056148	0.801475487233729	0.570824912935837	0.823740910510418	0.873161250027608	0.840643787478124	0.761510276956525	0.876871884473308	0.846026720110402	0.627988832424339	0.830659787910294	0.809213444773332	0.706002512345474
Erythronic_acid-1,4-lactone_(2TMS)_462181.38_TRUE	1.40660593449514	1.35946250484531	1.41604795066469	1.46549010056846	1.4277307447232	1.36208586445123	1.53122847356427	1.35259328221733	1.50250425286187	1.4115525022444	1.36841063496723	1.40206737573487	1.49668139949467	1.42678133700863	1.46596119358099	1.29154634437924	1.40999722500056	1.43394241672664	1.47007504262612
Glyceraldehyde-3-phosphate_(1MEOX)_(3TMS)_BP_571519.81_TRUE | Glyceraldehyde-3-phosphate_(1MEOX)_(3TMS)_MP_577300.12_TRUE | Glycerol 3-P (|Glycerol 1-P) [MP-1.1] | Glycerol-3-phosphate_(4TMS)_574746.69_TRUE	1.1382225325447	1.23693596640146	1.13070836210559	1.13767684124256	1.1401648587232	1.11680780783323	1.0705593099322	1.16719307737532	1.07559646721354	1.18611040263254	1.18227204350276	1.15669882330354	1.10440627951491	1.14433871356816	1.14386010313128	1.17366628007799	1.09342301514825	1.10371481793439	1.12779535609357
Rhamnose_(1MEOX)_(4TMS)_BP_570616.31_PRED	0.887015904098511	0.97452357215948	0.864091981260647	0.872769384611432	0.858864039450174	0.89167946492519	0.822433298619681	0.879587542853645	0.801676159538629	0.90970676984627	0.932996345852069	0.887234600619802	0.862377139910766	0.89587118456173	0.901328963465594	0.872552755600657	0.879673126059928	0.872261505818241	0.869521969145386
similar_to_Asparagine_Derivate_505075.09_PRED	1.20607809797631	1.24995561671258	1.2523273951533	1.2404508489146	1.25415692939206	1.16675457831245	1.24259678138394	1.24802627448667	1.20226184868822	1.20509590968726	1.20632247407754	1.19688415515722	1.21178926944836	1.18926819443126	1.17011411312785	1.26476475761579	1.16494909196457	1.22398168348346	1.16748887227568
Tartaric_acid_(4TMS)_511834.44_TRUE | Xylulose_(1MEOX)_(4TMS)_MP_509094.19_TRUE	1.21763289896279	1.22373963160255	1.26731362242986	1.2360340208207	1.25669363676206	1.16631903311599	1.27201627561376	1.26586348798505	1.21612769972341	1.21448911920196	1.1873633461316	1.19639601831574	1.2055945145479	1.17654172733856	1.17006181094489	1.27753063126341	1.17245480821028	1.21831743932446	1.18103901629054
Lysine (3TMS) [MP-1.1] | Lysine_(4TMS)_616386.69_TRUE	1.15656227640096	1.2032875882067	1.16578732927331	1.16613977303585	1.12115479138032	1.20258644332518	1.12826190928226	1.16002849715063	1.16384862578452	1.26649195840909	1.24500642166725	1.2268217282069	1.15889284541159	1.22679291582271	1.17849113377717	1.14288904627618	1.14947018699763	1.16222213865935	1.09425542066313
Tropine_(1TMS)_336960.03_PRED	1.23652153725207	1.26434615092487	1.2801685893097	1.25967942784573	1.25085925408719	1.18320918489012	1.30262997217736	1.34120345752024	1.24985194516761	1.24826513453545	1.22747431369347	1.20584488953963	1.21812167393157	1.19534448670193	1.20768006132275	1.34214005944256	1.24722689324657	1.21919725026532	1.25029021973654
Butanoic_acid,_2,4-diamino-_(4TMS)_519172.62_TRUE | Putrescine (3TMS) [MP-1.1]	1.06982830576592	1.04787951925081	1.13945830425323	1.05739251087427	1.05761331592361	0.916649839593842	1.33929555742862	0.975351353191613	1.08734501083877	0.939914930718404	0.974052525723866	0.980422734807373	1.12387736990837	1.00735252588985	1.00023598677739	0.866132669529397	0.974557911852865	1.02394457716894	1.02028195010438
Ribose_(1MEOX)_(4TMS)_MP_503578.66_TRUE	1.20759777096854	1.19905476600354	1.261262064874	1.22261678113503	1.24385433982271	1.15049077954886	1.26135014084926	1.24769490183598	1.2036832561845	1.20455872577016	1.16347789910099	1.17956840571178	1.18429797918534	1.16151791533196	1.15669107824834	1.26836413889088	1.16568587908337	1.20596413805117	1.17060794102514
Malate (3TMS) [MP-1.1]	1.30491203309883	1.30607685679665	1.28522151072924	1.31081483494587	1.26780506756963	1.20487205608861	1.30364918017545	1.27502879708087	1.31155272404776	1.33497549849597	1.27607053310644	1.25510253543798	1.2982962377303	1.19496867741538	1.18558777343408	1.20387969629241	1.24167860850555	1.29046385039605	1.28465700806653
Adenosine 5-P (|ADP|ATP) (5TMS) [MP-1.1]	1.16666095803155	1.17215523156372	1.27069373824646	1.23935548909681	1.40362638368312	1.34103381809584	1.28426527726595	1.41215834007774	1.39670696656149	1.34615492198346	1.21925201011564	1.37683170440932	1.22239935901013	1.11790532175554	1.37686289163688	1.3389881473611	1.29456936209681	1.22163675022456	1.29816753658712
Mannitol|Sorbitol (6TMS) [MP-1.1]	1.10721479218888	1.1050859781828	1.19086492346484	1.13982638242049	1.16837932000574	1.03608902022515	1.17702993151376	1.19358827982948	1.16563437612077	1.12177488759693	1.05424256755068	1.05016955463868	1.08268954827413	1.04253377454929	1.03281100692215	1.22518290117986	1.10414119910861	1.06512995666568	1.12673753080245
Octadecanoic_acid_(1TMS)_770496.62_PRED | Octadecatrienoic_acid,_6,9,12-(Z,Z,Z)-,_n-_(1TMS)_768264.69_PRED | Octadecenoic_acid,_9-(E)-_(1TMS)_771147.94_TRUE | Octadecenoic_acid,_9-(Z)-_(1TMS)_769944.38_TRUE | Stearate [MP-1.1]	1.17413482978085	1.29377975245782	1.526397954025	1.27178762850729	1.32534106055222	1.2121413421023	1.45417721942812	1.45189699654119	1.42137287811294	1.30431522119809	1.13103429352173	1.2733502037388	1.1963577854736	1.09230666663129	1.30850820052895	1.37068060652411	1.28341134470736	1.2127618579252	1.24282794510401
Glutamine,_N-acetyl-,_DL-_(3TMS)_655207.31_PRED	0.6572247195108	0.765789010166969	0.672132409433421	0.696321906066848	0.664952578189096	0.723969420760325	0.666184228876494	0.728385018255605	0.683143246508712	0.684646414638555	0.766003103795829	0.665834124837074	0.722953424213372	0.739135518395735	0.736710775538609	0.655942418666527	0.766264343201485	0.748581300133484	0.69553108339842
Propane-1,3-diol,_2-amino-2-methyl-_(2TMS)_245096.62_TRUE	1.04564056010812	0.953893477595446	1.01779272286344	0.95294575492406	0.968984529462159	1.05732209961533	1.08489272907332	0.945312750991582	1.1478222340189	0.984280293387863	1.04005862344507	1.12974380144717	0.992867455164145	1.10625604210654	1	0.922833450136739	0.950001484689218	1.11793896530689	0.998410947229033
Homoserine_lactone_(2TMS)_458933.88_PRED	1.33658122808095	1.29366431266785	1.34037294734459	1.39106285718685	1.35286357633374	1.29612610060092	1.45562780256406	1.28632200949326	1.42596877271187	1.33549977080323	1.30327846344741	1.33344938811363	1.42358915111298	1.36090493532716	1.39492784629926	1.21726776815494	1.33962443006552	1.36425914513679	1.39716749946752
Citrate (4TMS) [MP-1.1] | Citric_acid_(4TMS)_594326.44_PRED	1.14287977470416	1.1272802185458	1.13849009485303	1.21109708779114	1.18099656440073	1.13227828205854	1.23582668046392	1.22015056270715	1.18977913743426	1.16077742603864	1.10285841161996	1.05134091550449	1.21078453098872	1.1617074766589	1.19757704732295	1.07753989734778	1.16032123259242	1.14879630860888	1.19001730101482
Pentadecanoic_acid_methyl_ester,_n-_620606.38_PRED	0.639732387844142	0.768941235433169	0.615280030585767	0.65423410566314	0.543587106288497	0.796860180183273	NA	0.651041084992791	0.4845770866246	0.687691547847008	0.759842870252477	0.711842586107429	0.674045647502953	0.756040240781155	0.731910066735118	0.514408909507827	0.706813870287281	0.698900090471385	0.587336324464811
Hexadecanoate (1TMS) [MP-1.1] | Hexadecanoate|Hexadecenoate, 9Z- (1TMS) [MP-1.1] | Hexadecanoic_acid_(1TMS)_697328.75_TRUE | Hexadecenoate, 9Z- (1TMS) [MP-1.1] | Hexadecenoic_acid,_9-(Z)-_(1TMS)_696619.5_TRUE	1.15821121888802	1.27608720400342	1.4645543222969	1.26400337164107	1.29899369675022	1.16811343671531	1.40689831279323	1.47808659274808	1.34723006443604	1.27947494156122	1.11559107228117	1.23430415716589	1.17386359117302	1.10419098066702	1.31899044579905	1.3447430660764	1.26201926475866	1.18912440169024	1.23109219489989
Glycine,_N-acetyl-_(1TMS)_334790.31_PRED	1.19259977894125	1.21728812151594	1.26277663867537	1.19220710910808	1.19715190822864	1.1242521710863	1.2797730383383	1.30986501510125	1.2147288523619	1.18579926310546	1.18300777086029	1.14459347089653	1.1543981951947	1.13202732681089	1.1504159252231	1.31010947229697	1.20284135813601	1.14739346397152	1.20483192458578
Mevalonic_acid-1,5-lactone_(1TMS)_454636.47_TRUE	1.29977754040156	1.25835753970774	1.31021452607095	1.35147267058972	1.31613274151644	1.25956997854641	1.41868722568062	1.25533786171217	1.38396095244053	1.300185002004	1.26007123828846	1.29294192426057	1.35451709345003	1.30492494260161	1.34253947781543	1.19189033484308	1.30478693161041	1.32159454018125	1.36531283303305
Tridecan-1-ol,_n-_(1TMS)_547762.06_PRED	1.23788485133659	1.14177328404443	1.30988531594925	1.20965433879335	1.23856935697865	1.13019309693205	1.31289001899206	1.34733223000382	1.26170225766268	1.23716720229008	1.11394432632442	1.15141313224235	1.12963220302917	1.11437350124583	1.16602867529353	1.38228342908051	1.24958569920833	1.19028817415436	1.25525788256516
Valine (2TMS) [MP-1.1] | Valine_(2TMS)_272492.56_PRED	1.20690720853956	1.23401024941319	1.28686793970912	1.2364869789489	1.22030657952133	1.16787066636489	1.25288915305335	1.17034501203766	1.24990569813998	1.26239555792633	1.20905217056251	1.21843578810909	1.22864678437734	1.23926194037976	1.23620626405631	1.26201373225278	1.21833162699728	1.18709491890164	1.22834562422359
Nonadecane_653263.69_PRED	0.651135741336319	0.782115648140939	0.688963547363412	0.702102436155441	0.671870514021713	0.732041924080681	0.645973351862915	0.742620615782814	0.717218342970736	0.693097222041856	0.777155734759853	0.660321698115304	0.736181972527544	0.749900008706658	0.732475693009556	0.666685569600294	0.770373054264091	0.749306321052055	0.696118473390504
Serine_(2TMS)_328955.09_PRED	1.16271815798343	1.18711548263212	1.21312344361165	1.1635424436709	1.16059968541398	1.09416765990713	1.23941156222195	1.2764909887475	1.17410282731067	1.16252485332033	1.15083074885278	1.11410709063839	1.12888692037601	1.10823968050923	1.12686010346576	1.27422054760123	1.1754825059852	1.12577818053259	1.17703086662847
Cinnamic_acid,_3-methoxy-,_cis-_(1TMS)_587950.5_TRUE	1.1588098423136	1.13426119707059	1.24626853813864	1.19199021312636	1.24330478630906	1.0656595238366	1.23659233298937	1.24991055918476	1.23946370984196	1.18479662332826	1.0893059678275	1.11004679777382	1.12714976797333	1.07593302136377	1.07996932307979	1.30988682373307	1.14393918544548	1.13133628828435	1.18160971366919
Leucine (2TMS) [MP-1.1] | Leucine_(2TMS)_306195.44_TRUE	1.14842015633041	1.15296124960138	1.21963572637001	1.17491815933615	1.15813936553492	1.1155163670927	1.18688181692807	1.10618860761828	1.18918373928289	1.2241090233481	1.1546508733775	1.1435573875493	1.14299689099164	1.1872583788854	1.18516645670894	1.18530311361124	1.13538413766602	1.16320563881315	1.13602189111387
Glycerol ((3TMS)) [MP-1.1] | Glycerol_(3TMS)_292962.19_PRED	1.2814183301327	1.22978900654125	1.28834150282088	1.25690655464544	1.14773874637916	1.21916045691384	1.31759327423243	1.17004423200436	1.33757086218011	1.31186372749053	1.24004572307215	1.27639789465041	1.30172277382194	1.2733886522709	1.26377305002717	1.1133151540869	1.23323567665978	1.20218047272951	1.33200818793725
Proline, trans-4-Hydroxy- (3TMS) [MP-1.1]	1.27073979161124	1.32702186859137	1.35058644901786	1.43567920118152	1.44908539690835	1.22920468527536	1.37907337032492	1.4462553332467	1.27355230247362	1.3468778611163	1.27111324780542	1.23884237700424	1.28569124546712	1.20864007669987	1.2614926729843	1.48624529176435	1.34240505361659	1.35215174202778	1.34014392678077
2-Piperidinecarboxylic_acid_(2TMS)_375026.84_TRUE | Maleic_acid_(2TMS)_373998.81_TRUE	1.19757907404657	1.18551804651688	1.18033155967601	1.18983262360074	1.14918445808777	1.07782476883463	1.17667835600909	1.14888702591288	1.1896476272267	1.22544340218001	1.18077475985872	1.14511447000738	1.17616220116181	1.07361180759437	1.06196953764645	1.09425001253024	1.15585171902253	1.18659555056762	1.17188317947015
Valeric_acid,_3-hydroxy-3-methyl-_(1TMS)_235895.11_PRED	0.94757878167829	0.861207407451428	0.910247850049597	0.855361062941592	0.853311542043171	0.972352252604635	0.987142256413787	0.825235755646911	1.04210553609825	0.880218738916573	0.952928077850987	1.03412077658602	0.900352675754813	1.01883003164593	0.902748420493927	0.825853409821927	0.850588609413696	1.02751796829496	0.905419880877901
Hydrocaffeic_acid_(3TMS)_667708.25_TRUE	1.11636140672489	1.12517814675289	1.15688740881898	1.13245656345909	1.07706109339666	1.16029713635177	1.16495966421862	0.99755007593806	1.16869467541465	1.19402138567609	1.17340278407199	1.14217130543949	1.12534213203455	1.17492242069941	1.15899666902313	1.16670813146617	1.10901844101107	1.10124664205485	1.12494292250911
Methionine (2TMS) [MP-1.1]	1.18396169333601	1.1482024565861	1.16866569516024	1.21546915112294	1.21222990004412	1.14520890937263	1.15412336560696	1.15103123803534	1.13692507678487	1.20617270740207	1.16593777266892	1.16535954864533	1.11861276938516	1.10285657095259	1.12122269755216	1.18260217393034	1.13209615807402	1.12920770786975	1.14579985088406
Docosahexaenoic_acid,_4,7,10,13,16,19-(Z,Z,Z,Z,Z,Z)-_(1TMS)_907201.25_TRUE | Docosanoate (1TMS) [MP-1.1] | Docosanoate|Docosenoate, 13Z- (1TMS) [MP-1.1] | Docosenoate, 13Z- (1TMS) [MP-1.1]	0.963415965079307	0.976070211060855	0.89668854404838	0.916834121915219	0.902795642923736	0.850304931442313	0.756234171224741	0.89558959084908	0.79751326511154	0.896400516528804	0.972352552143461	0.896115593656628	0.909805951386538	0.916683134069832	0.755971990697405	0.806903988284808	0.946096855039293	0.880693405288675	0.891653464567786
Hexanoic_acid,_2-ethyl-_(1TMS)_254181.88_PRED	1.1187927265863	0.981947618837854	1.18169945352924	1.05693667272452	1.11475510089793	0.992398274530004	1.18401598369806	1.21934990010779	1.10605195367683	1.08073442941259	0.988564453634027	1.01907837896972	1.01421535515817	1.01782076853139	1.13153051363387	1.33830759402182	1.17121552089508	1.09515761157543	1.13913780602394
Nicotinamide (1TMS) [MP-1.1] | Nicotinamide_(1TMS)_515482.47_TRUE	1.2240490133286	1.28944815701618	1.23892245801913	1.24561925079584	1.21858346708445	1.12230310864555	1.25273658136515	1.22679201459198	1.17781580956567	1.27377894504571	1.24426804195586	1.20263293026	1.20091797044095	1.12279278149373	1.10726915139248	1.25387140096157	1.18291009340809	1.19694523573953	1.20757104333144
2-Piperidinecarboxylic_acid_(1TMS)_357365.44_TRUE	1.19791439263162	1.27851660967237	1.2528466058806	1.30715062096081	1.27680185275458	1.18053867180528	1.28021480918013	1.17711379168409	1.22077548522585	1.30324740923992	1.25683708419544	1.24135671053685	1.21496992900169	1.18839338607536	1.21307966363309	1.2825582543371	1.17575367190202	1.22948760044147	1.23951550095308
Fumarate (2TMS) [MP-1.1] | Fumaric_acid_(2TMS)_371909.34_TRUE	1.1883785448614	1.17508346987907	1.160943295639	1.17796552766357	1.12832661964405	1.06404307896504	1.1695170972339	1.14390183513567	1.16988826440813	1.20763452599413	1.16803795547861	1.13422307882559	1.16547024916064	1.05761915317638	1.03574402660657	1.08044661314556	1.14625442996046	1.17358769354932	1.15973277389599
Methionine_(2TMS)_474948.12_TRUE	1.17513999284495	1.14410266032586	1.15277775309313	1.20788388105414	1.20545690756427	1.13574259532713	1.14453947998133	1.13349117184394	1.12360913288818	1.1930723069088	1.15768932085385	1.15768641553381	1.10466021431108	1.09297655658046	1.11091289029362	1.1766328111436	1.12041216719394	1.11919087181959	1.13600551826643
Homocysteine_(2TMS)_506276.72_PRED	1.05798587180907	1.05572185780582	1.09531355817031	1.06535110575908	1.07802112481486	1.00950744756261	1.10858740240211	1.07149632572608	1.03991430839252	1.03829075725269	1.02496517237959	1.02858109804968	1.04152397896181	1.02344068475807	1.01497593231215	1.08630788330911	0.994576806041817	1.05772560734603	1.01224289373507
Malic_acid_(3TMS)_442513.44_TRUE	1.14669781787133	1.15554260204033	1.11915601428807	1.15277865732744	1.10487627717756	1.06473490302743	1.13227820212435	1.09225869112769	1.14743489293523	1.18036518375881	1.13506689658677	1.10548425833668	1.15763233786384	1.04734778669562	1.03619055953256	1.01351392814625	1.08319740786349	1.14403729343841	1.12373635060706
Levulinic_acid,_5-amino-_(1MEOX)_(3TMS)_MP_574704.06_TRUE	0.569661509167108	0.606064937437842	0.566659374834763	0.570934125707822	0.512272717816772	0.625189958255726	0.584001839472066	0.583392236621472	0.455921817462079	0.532731195573267	0.611308345537725	0.545094301107524	0.595429827074581	0.57643877897102	0.569487712801623	0.573828255916347	0.604315617368902	0.588708505199021	0.551899361504644
Isoleucine (2TMS) [MP-1.1] | Isoleucine_(2TMS)_318827.91_TRUE	1.08065360817863	1.10538949335381	1.15106894560332	1.10328655326989	1.09018096860602	1.02039946272417	1.09154622705272	1.05579058338114	1.09135103819347	1.10509573465708	1.04958450877212	1.0612802701625	1.09696760486446	1.09527616075898	1.09115264027392	1.10932099404117	1.1005105940997	1.07138130403862	1.07954212473654
Asparagine (-H2O;2TMS) [NN-3.1] | Asparagine_[-H2O]_(2TMS)_494442.75_TRUE	0.91066141941448	0.81056946916495	0.906642457672715	0.898359899295818	0.902040657763933	0.881259913076375	0.938479073427297	0.955470650826559	0.883107969807548	0.93885772072158	0.897271885876217	0.907362323825489	0.851716051790659	0.864013565569673	0.88949938218609	0.972801101605349	0.881231866001485	0.899669195246407	0.931308656340165
Alanine, beta- (2TMS) [MP-2.1] | Glyceraldehyde_(1MEOX)_(2TMS)_MP_277992.03_PRED	0.782780058377737	0.84661168180987	0.847102806213808	0.822860447316955	0.839331990724442	0.815638667714888	0.826239254284743	0.887713937923739	0.739064464664368	0.85706480241785	0.822334047697341	0.781783764625666	0.830126213563904	0.776048683509403	0.910414396669608	0.901716187097976	0.806060165080331	0.832493526838597	0.826681658528266
Succinate (2TMS) [MP-1.1]	0.717078353106881	1.05070255187989	0.861790804201013	0.910737739286122	0.908295553423455	1.02540753583348	0.93571765786225	0.969891151852521	0.887354158294854	1.00436533125864	0.972200576018871	0.993681992287551	0.968370664884084	1.05609796180228	1.0536930200134	0.884105361092869	0.857037972836741	0.880502549329388	0.909282185520161
Phenylalanine (2TMS) [MP-1.1] | Phenylalanine_(2TMS)_531431_TRUE	0.993700670901024	0.996869009253341	0.98330726429466	1.02661620142959	0.998284903605022	1.00665677915058	0.999623250262856	0.934220912949412	1.00297124110072	1.04237779332825	1.01044863970522	0.998261696321297	0.968579833265131	1.00800637133172	0.998251555070239	0.998185411367012	0.960036662726223	1.00277576643016	0.952565408623073
Arabitol_(5TMS)_503104.56_PRED | Ribitol_(5TMS)_503667.69_PRED	0.971994130778867	1.01121873674422	0.987777334023094	0.993439094279793	0.988046338345853	0.950436984319681	0.976769460911114	0.980932267906886	0.933953345629026	0.967377661323417	0.984458600632757	0.962573042839296	0.985022936435246	0.966766336241031	0.946185985914161	0.979482058573163	0.937659868279571	0.986058967705185	0.919558704268398
Nicotianamine_(4TMS)_902113.62_PRED	0.884905099703565	0.902018151961433	0.802527307118229	0.837255927705138	0.826033770694128	0.763863266522571	0.676527721619656	0.808635684601918	0.710764736411724	0.818778000611586	0.903665130085648	0.824488930332919	0.84163184010865	0.849088565536538	0.678525079228461	0.725060912388432	0.879896671861717	0.801865721352563	0.814523142065187
2-Piperidinecarboxylic_acid_(1MEOX)_(2TMS)_549118.94_TRUE	1.07339221124248	0.989511280523084	1.14291048382214	1.06230809027051	1.07440862284279	0.999934331814841	1.14867846251881	1.1716627454771	1.09031854115981	1.07617681945113	0.972693977754192	1	0.98236544090244	0.96672195829582	1.02228117723207	1.19212207946741	1.09613111827955	1.03299402901096	1.09468997601909
Tyrosine (3TMS) [MP-1.1] | Tyrosine_(3TMS)_659029.31_TRUE	0.959408500087319	0.864846372290685	0.954146893868322	0.913052900491394	0.932740533274293	1.02821693066023	0.980083539339143	0.803184988979748	0.997028758899277	1.05496184709078	1.01119726112326	1.04228858109054	0.903852045959632	0.983469737213746	0.988891223049827	0.957242573818612	0.947066268880623	0.912083585968886	0.968013928629124
Docosanoic_acid_(1TMS)_904290.44_TRUE	0.886865978176307	0.897155449410302	0.836802231165562	0.837662153177459	0.827170567637251	0.77116079783348	0.6793233586031	0.820511578742743	0.719176404024679	0.814744963126391	0.898235110442103	0.816208631831776	0.831849496754515	0.838583249008887	0.701711532938753	0.759349017821615	0.857445854401928	0.808083822383664	0.822177286232907
Hexadecenoic_acid_methyl_ester,_9-(Z)-,_n-_652277.12_PRED	0.437818616172484	0.575805231105756	0.478092772585436	0.538798748873575	0.473178378285195	0.527021125102724	0.485207882688599	0.537479465797072	0.465502211290259	0.477430459195561	0.565960567236047	0.473645597121188	0.533535762021262	0.572204810450564	0.556226438188603	0.492869920440219	0.570469844108749	0.545467824328539	0.507852648904629
Butanoic_acid,_3-hydroxy-_(2TMS)_249401.72_PRED | Butyrate, 3-Hydroxy- [MP-1.1]	1.25236951329577	1.2795362954389	1.28287245535298	1.26021882480372	1.27238834884611	1.18971510258094	1.20081940797422	1.30151950187688	1.19595685787027	1.29401181339832	1.21646762133687	1.2008154210092	1.27505547262423	1.17672644596477	1.17929055521583	1.2785128945994	1.2555299943567	1.19826649214271	1.25571706808354
Cysteine,_S-methyl-,_DL-_(1TMS)_354018_PRED	1.09402247424237	1.18243896843888	1.13405638250258	1.20878637606896	1.16713396642274	1.09091309958623	1.1567342256458	1.05523632442976	1.10000484537626	1.20843664705436	1.16935936707979	1.14113099177694	1.12062463454008	1.09124539202049	1.11478174937017	1.1529455490369	1.0654313917049	1.12750996357966	1.13150343533528
Arabinose_(1MEOX)_(4TMS)_MP_498992.12_TRUE | Lyxose_(1MEOX)_(4TMS)_MP_498323.69_TRUE | Ribose_(1MEOX)_(4TMS)_BP_501489.22_TRUE | Xylose_(1MEOX)_(4TMS)_BP_500236.69_PRED	0.92315426119019	0.868520566104995	0.89659251469317	0.865681672275193	0.832852150037945	0.754857162044023	0.74223950604464	0.836491229062569	0.762018138625762	0.825511604940885	0.883542881378229	0.823013698900182	0.856817347559152	0.81029476139304	0.723894629755318	0.782944942344313	0.897463640010744	0.857807027727197	0.840934575755168
Cysteine_(3TMS)_479326.28_TRUE | Pyruvate (1MEOX;1TMS) [MP-1.1] | Pyruvic_acid_(1MEOX)_(1TMS)_222801.88_TRUE	0.73096190272064	0.665150832069007	0.753178420756456	0.742979248289707	0.701122701523448	0.734508574503101	0.707916912375616	0.744568883742728	0.687215248823901	0.68837636764745	0.700523319757097	0.733156364041214	0.708058070052302	0.723495438778199	0.75518924836843	0.666685569600294	0.804888249101555	0.735645515438217	0.725338484394553
Heptanoic_acid,_n-_(1TMS)_255612.95_PRED	1.0166659766349	0.917565282544857	1.07377466744068	0.967433068902893	1.01239837298372	0.909535684329947	1.0640386340571	1.09800250251811	0.996592302282549	0.987832192402973	0.905884513209635	0.929223024995158	0.936288408273115	0.925042551424591	1.02948426190691	1.19796929298463	1.06988959168488	0.993202713895332	1.03548765168354
Galactopyranoside,_1-O-methyl-,_beta-_(4TMS)_598177.19_TRUE | Isocitrate (4TMS) [MP-1.1]	1.09078301631825	1.0355921802573	1.02378642389968	1.06574843679784	1.04666476902654	1.09810289834589	1.01184424441895	1.07331982676243	1.00901717228787	1.09975015726633	1.09640496817847	1.09422893438535	1.10100924300057	1.08437781619975	1.0410058076177	1	1.08972688616678	1.0089266754259	1.01176525946013
Butanoic_acid,_2-amino-_(2TMS)_249223.84_TRUE	0.995048741541256	1.01668550955284	0.993404062355888	1.02807569826374	1.04135980454931	0.952947614576109	1.00113024921143	1.00825995849691	0.958676422533049	0.999964837179302	0.961881498752163	0.975480955593456	1.00539818217738	0.938035790801939	0.945284042737903	1.00088192876654	1.00478010633149	0.944811249361907	1.01622756237584
Isomaltose_(1MEOX)_(8TMS)_BP_915618.31_PRED | Melibiose_(1MEOX)_(8TMS)_MP_914184.5_PRED	0.280595336486936	0.29096467881714	0.339119353407037	0.219435137409593	0.170810689852434	0.273725519677411	0.381082797287647	0.324213492406636	0.218101409816316	0.271118583371541	0.229974363286279	0.155545787257236	0.287626266816968	0.2516052561278	0.257762878759216	0.237046982598704	0.354660284695114	0.204494780680123	0.277088045462781
Glycine (2TMS) [MP-2.1] | Glycine_(2TMS)_226792.3_TRUE	0.537859482350134	0.704414046257976	0.623773207041743	0.628610532339772	0.532043882302478	0.51489460219693	0.649032462141411	0.752351767227594	0.561447582477077	0.561572082521627	0.718607003912647	1.07930935086542	0.709838857924463	0.844349338304424	1.21885167863351	0.961961400624903	0.685725399731711	1.29089486360026	0.635961363466126
Pimelic_acid,_2,6-diamino-_(4TMS)_654293.81_TRUE	0.44555717784752	0.55801881500141	0.478997594626063	0.493062720340611	0.452574313458061	0.519040006830316	0.442155075987189	0.520995224104794	0.477817242136087	0.486654383405118	0.556334460806581	0.42620113196686	0.51847152772963	0.537269961416915	0.513203895294234	0.515764361347928	0.570740745645298	0.561345135666271	0.519336546760005
Lysine_(3TMS)_631402.94_PRED	0.479283376377249	0.590167601271001	0.433183083220788	0.493062720340611	0.354938152344072	0.610802825349603	0.395380936603879	0.474935282784325	0.325767456055813	0.527034436925823	0.568280256653424	0.532244170730968	0.460632247431364	0.582989681067293	0.568865523765595	0.34556258060372	0.486026881075237	0.502116014975942	0.436912441081036
Glycolic_acid_(2TMS)_204397.8_TRUE	1.17082004148228	1.21861660985518	1.21108189848383	1.22701057973787	1.24516989126863	1.13902983998419	1.23679793083756	1.18986979356868	1.22550786348725	1.24079443771439	1.18788585260151	1.18294443704311	1.21483383840482	1.17893856785164	1.17385054612378	1.22464374973508	1.1931469103813	1.19507129601279	1.24450123179543
Fructose (|Sorbose) (1MEOX;5TMS) [MP-1.2]	0.615360018679421	0.740482835117657	0.643826334455388	0.651785630400725	0.618220929859774	0.634158881992912	0.56071977742939	0.654205013574466	0.58368450788182	0.615681465094911	0.69919491206937	0.658939412607962	0.666538220844336	0.606120342514517	0.575281692511445	0.543831617942176	0.639238899828687	0.557552715012207	0.624777814231477
Mannopyranoside,_1-O-methyl-,_alpha-_(4TMS)_559825.75_TRUE	NA	0.943073680335368	0.959123236358432	0.959440052920516	0.954125019061034	0.901259460534589	0.963657294609384	0.986458767645873	0.945003298787176	0.950556795743582	0.922338448927422	0.851855508973727	0.926790844189698	0.891728700047509	0.9245607247677	0.996627788767536	0.934373708000436	0.938449015253031	0.914836975669085
Pentadecane,_n-_462471.41_PRED	1.05914199391362	1.0235424724086	1.04675436335701	1.09876196497529	1.05907748219288	1.03545898926658	1.15528153987487	1	1.12584074584005	1.0529402250699	1.03005676796067	1.06009658412899	1.11314578631783	1.07597055049652	1.11432827499048	0.92266272071401	1.07788190095023	1.08443766211158	1.10864547036629
Fucose|Epifucose (1MEOX;4TMS) [MP-1.1] | Rhamnose_(1MEOX)_(4TMS)_MP_517543.41_PRED | Fucose_(1MEOX)_(4TMS)_MP_522432.03_TRUE	0.809134813343217	0.903001504414204	0.893834670862195	0.879777203155172	0.843623587628498	0.829900527796978	0.896282711527781	0.874711628969873	0.855640071214833	0.848269904657519	0.858731917534897	0.830014182725782	0.878681705315106	0.89054564163812	0.879476664794769	0.866965621368185	0.864235508913294	0.883811956823444	0.851215552545522
Ornithine-1,5-lactam_ (2TMS)	0.337066916154907	0.306389286887905	0.344768057637889	0.223777362490438	0.307060059453214	0.392895719921412	0.319325659435734	0.381795522473833	NA	0.377726541526003	0.362303963832872	0.373925964855437	0.346049823686249	0.359360966387133	0.310442203540699	0.350838115032299	0.322223034424819	0.282887524519618	0.320164318663557
Pyrophosphate [MP-1.1] | Pyrophosphate_(4TMS)_556794.69_TRUE	0.899542227652715	0.969335426926305	0.911005093429213	0.927896577619152	0.924397408668852	0.871536082404143	0.92088102138171	0.879115075924054	0.923767644466881	0.928239524147153	0.920805454797274	0.723413321854617	0.969772809558244	0.906365931759137	0.813751295824377	0.884105361092869	0.905307834995899	0.915614327574144	0.864864775916613
Asparagine_(4TMS)_BP2_626664.06_TRUE	0.466900890135696	0.561660266938455	0.409198392213791	0.473576032958576	0.40287957748191	0.625028021047266	0.406938612921542	0.41033345426989	0.39554138566422	0.501032369110309	0.541274140631127	0.563827709240575	0.502532354712343	0.569435431128414	0.53070988681356	0.374360493987604	0.487791586473192	0.490428397174155	0.429161088845375
similar_to_NA_(Hexopyranose_like)_623755.44_PRED	0.487900892593421	0.535557458558216	0.434906297106206	0.491929175056574	0.417079720479285	0.56636115355072	0.444984249714847	0.477366632386072	0.387534039479098	0.539523956760502	0.539633131125945	0.503125286495941	0.480475473012938	0.533604129248274	0.525491727583331	0.48618181668865	0.540315455757955	0.475043536979128	0.426946433169933
Hypoxanthine_(2TMS)_659841.12_TRUE	0.982089504719722	0.940353040836388	0.945336443875299	0.85450202104297	0.822105043325728	0.815491377344262	0.79356262063813	0.846096885842289	0.809288492125647	0.909589495639125	0.933141558015926	0.90182226646287	0.81309645562817	0.837332124751905	0.830449955794414	0.838825728039622	0.88937054723446	0.863283450899157	0.889695119576293
Calystegine_B2_(1MEOX)_(3TMS)_BP_620736.44_PRED	0.408436343905541	0.534352126285773	0.424319623806333	0.391740709746553	0.384151961822759	0.559426603396099	0.335218875859653	0.379095957646146	0.301410571730244	0.457903698536356	0.511154400363357	0.463070131785362	0.436786195699979	0.522311547452044	0.51276300101061	0.291787840625731	0.482894297061042	0.461533893483891	0.426946433169933
Glucopyranose_[-H20]_(4TMS)_561007.94_TRUE | Glucosyl	0.779938848618365	0.904725663128242	0.816397327471888	0.805581312918526	0.804512767380235	0.809332351065679	0.809052352285616	0.788592607486089	0.725418543215215	0.835778679338925	0.849105107199546	0.808023075295271	0.813000587474391	0.797736077525245	0.80412668546396	0.786389003094832	0.745573746045943	0.822213532060973	0.750131081141542
Glucopyranose,_D-_(5TMS)_678044.25_PRED | similar_to_Glucopyranose_(5TMS)_677743.06_PRED	0.805502893528894	0.873750932401814	0.826529484215051	0.885983985404898	0.870025523011818	0.8392267050576	0.826776636815956	0.898000483372052	0.797655118549498	0.872912933112733	0.86348770360987	0.82055065136877	0.83578913697696	0.852763960708575	0.870092261556734	0.891513404227678	0.796525447513108	0.858215775303667	0.8058405974536
Glucuronate (1MEOX;5TMS) [MP-1.1]	0.768086285189868	0.844626959957195	0.803479508291692	0.817699632082398	0.799795882428785	0.775825796519706	0.780716591879526	0.812183448120197	0.761329611538138	0.796663908988361	0.824856159604935	0.777360945860291	0.826315937674092	0.809981673616073	0.824181302326571	0.727378555760022	0.806608898042696	0.825280795835757	0.755736001549966
Guanosine-5-monophosphate_(6TMS)_1065235.12_TRUE	0.707960238621568	NA	0.776074486119711	0.565507398628855	0.839573039096505	0.676041129749434	0.600787493456924	0.824351068504033	0.807772893576796	0.805689341549332	0.602043351449344	0.875220462139067	0.538517009523292	0.49648145410565	0.618388181999915	0.61483114773884	0.798618792729921	0.513672783773047	0.773719291376354
Histidine (4TMS) [MP-3.1]	0.621894956486223	0.683807606687793	0.633479155337805	0.600105040045599	0.536302590498451	0.65425951424503	0.559588702017584	0.580161368023243	0.565948576070187	0.676795832944882	0.666441581627121	0.508590142735602	0.583092980683154	0.678899942911717	0.560878420282157	0.561017525111312	0.646875433074095	0.439333435143049	0.564651553283704
Isocitric_acid_(4TMS)_597989.19_TRUE	0.752902591455257	0.592470923055362	0.751093466418356	0.643263550633945	0.788912221933152	0.712965135690989	0.74096493814872	0.803326746839602	0.755549648936539	0.843333323640837	0.647684868919387	0.883230717492988	0.650435889084085	0.62337146788014	0.688025072137906	0.779203593314104	0.720804711811125	0.700767102232563	0.681772902910456
Propane-1,3-diol,_2-amino-2-methyl-_(3TMS)_305353.78_TRUE	0.919710901066779	0.920222214116995	0.970285832651544	0.942795928867585	0.910411158405426	0.903962737258598	0.942593417381194	0.884799447959397	0.938545520832981	0.993127224238054	0.939288883671474	0.921115982508475	0.915530123182035	0.971057076558867	0.958893079323769	0.952358841027388	0.919145194571409	0.933542110528069	0.893558315943499
Galactonic_acid-1,4-lactone_(4TMS)_619566.38_PRED	0.783052569217478	0.820548075248047	0.777535683014619	0.795308612241247	0.776335047639476	0.773414463965321	0.776424463006537	0.790726368308182	0.752801513810259	0.775186874835057	0.81198679704985	0.748265533036383	0.813240155425863	0.805774723739694	0.803691741177942	0.728145076586628	0.817552011205883	0.796628125984634	0.751137357185691
Glutamine ([-H2O]2TMS) [NN-3.1]	0.746191221775525	0.718423395571055	0.774324304487623	0.713073363683256	0.779093432202179	0.722216639766512	0.806276161340206	0.747071757948261	0.751775512613244	0.812049496944743	0.705138211702691	0.781688853926667	0.693772468359636	0.660558768177879	0.731228684070279	0.800017531086719	0.741419147945991	0.759290737785729	0.702643075722381
Ascorbic_acid_(4TMS)_652392.44_TRUE	0.347344003015783	0.473357701964499	0.415013549352181	0.412768609416222	0.367674827156112	0.442577991081812	0.395380936603879	0.472472010832446	0.416208263899332	0.416691352824876	0.479390210401515	0.397885217716396	0.450172594611922	0.452176229999077	0.458718092694698	0.408999532012762	0.508832117341937	0.461533893483891	0.37442209720984
Histamine_(3TMS)_653726.19_TRUE	0.452966337394811	0.557316227989977	0.47672725018254	0.503485191109635	0.495460867003102	0.550117744436428	0.437828639477956	0.589248689879288	0.476755063474806	0.501032369110309	0.55976907705884	0.463070131785362	0.546192170911222	0.551151437460124	0.559892810114007	0.519775578005917	0.568012292503301	0.568984093082932	0.480742847006266
Tetradecan-1-ol,_n-_(1TMS)_592555.94_PRED	1.45595044011164	1.38845195425385	1.38324438640799	1.43339449207709	1.37687661641528	1.43345550819916	1.34577669221791	1.43110673994882	1.33707005729764	1.43842444796571	1.43966058484317	1.39889625208599	1.4588357106357	1.43212446665103	1.38074628192225	1.31054608557616	1.45715214505085	1.35426330259855	1.35816731864779
Glucose,_2-amino-2-deoxy-_(5TMS)_BP_620384.06_TRUE | Calystegine_B1_(1MEOX)_(TMS)_623873.94_PRED	0.390354268371625	0.505875255051572	0.370697706657708	0.420018112237719	0.249449931677844	0.511630907570115	0.306441973901686	0.376356981723138	0.236473944085531	0.413483428665876	0.453029594237637	0.419247303426165	0.359386711118281	0.474751795102672	0.453701446022858	0.291787840625731	0.405455364562463	0.423560009761628	0.316048319265711
Heptacosanoic_acid,_n-_(1TMS)_1053682.38_PRED	0.835814402869485	0.847532085584679	0.906414788199753	0.902012226652843	1.04140842758152	1.02256121748818	0.926708774606392	1.03620759995014	1.03232858146516	0.999095005608404	0.901326594371376	1.04651806602484	0.893781156640521	0.803670031311778	1.05498023947201	0.952456734386298	0.954341230879721	0.886229297255882	0.942059902128411
Glucose (1MEOX;5TMS) [MP-1.2]	1.20980185685392	1.16238564028194	1.15110572764081	1.19411826898218	1.14844027997943	1.21955538770526	1.11258970800084	1.19172037131248	1.1118734709409	1.20831403549416	1.22346971496083	1.17722752433627	1.22932503422079	1.2188859693513	1.16591369912378	1.07652664360717	1.22436779879568	1.13029727470029	1.13234117769758
Agmatine_[-NH3]_(3TMS)_578698.75_PRED	0.730471510924333	0.844336909734979	0.708397067185488	0.727476756970758	0.703045508903204	0.76715526544614	0.675923129632613	0.723244518105459	0.654296799457663	0.765825472703221	0.80868131085406	0.772416555278459	0.711513310174496	0.770738382183811	0.7823808526219	0.724126156961328	0.715763556389767	0.719254221971129	0.723923671610289
Hexacosane,_n-_908082.69_PRED	0.746974651453823	0.782673891485298	0.673885584152155	0.702508219621532	0.676807555726835	0.64918841615051	0.575870050845458	0.678038010026157	0.578215906355952	0.684925423014382	0.783557217078381	0.690133429406001	0.704804327125839	0.705871623513282	0.577364874468945	0.620464904894543	0.742118603129293	0.683708825809168	0.676502925072656
Cellobiose,_D-_(1MEOX)_(8TMS)_MP_862370.81_PRED | Lactitol_(9TMS)_862430.56_PRED	0.225562329123936	0.162293213034635	0.24706432461199	0.248560123907139	0.18287746207985	0.258368574136009	0.270569310669698	0.369329324245426	0.256709480465121	0.314570347972842	0.310434125049883	0.207507971773507	0.239991684459055	0.161211333303618	0.201813335998329	0.305363267646481	0.231848373717771	0.258703965627494	0.203599003062907
Fructose,_D-_(5TMS)_622992.38_PRED	0.368217954513998	0.49955578865504	0.365792345283806	0.347300533330443	0.335493809467007	0.51745833773662	0.327442604282007	0.398455024822097	0.174795399997946	0.432494125398227	0.471211120427656	0.452121150772237	0.414723753354999	0.491742712852196	0.439737738099043	0.261456282319888	0.417106438345577	0.43279948398487	0.287169827366979
Trehalose, alpha,alpha- (8TMS) [MP-1.1]	0.852972681071838	0.819318447598421	0.834001282243422	0.801715563031677	0.744462404699171	0.698304671801161	0.815436219729313	0.738061300107645	0.75007316658085	0.770525205778134	0.823147314699391	0.743320024519428	0.801388854483288	0.732364187747141	0.695866190955761	0.741025651201653	0.778064197309301	0.841136615737949	0.796378189041848
Allose_(1MEOX)_(5TMS)_BP_588062.44_PRED | Altrose_(1MEOX)_(5TMS)_BP_593442.75_PRED | Altrose_(1MEOX)_(5TMS)_MP_590452.62_PRED | Galactose_(1MEOX)_(5TMS)_BP_588777.81_PRED | Galactose_(1MEOX)_(5TMS)_MP_587519.31_PRED | Glucose (1MEOX;5TMS) [MP-1.1] | Glucose,_3-deoxy-,_D-_(1MEOX)_(4TMS)_589111.5_PRED | Glucose_(1MEOX)_(5TMS)_MP_591351.81_TRUE | Gulose_(1MEOX)_(5TMS)_BP_593076.44_TRUE | Idose_(1MEO…	1.478141654675	1.4110499401593	1.40046503009717	1.45721634264891	1.3951542694412	1.46431153265726	1.35021729935406	1.4442418390036	1.35298876364724	1.46330501683755	1.4759065858952	1.42033975756736	1.49208225302218	1.46925916721823	1.40414161925186	1.31667440640349	1.47937451160342	1.37564868602776	1.37464026688962
Homoserine_(2TMS)_380616.94_PRED	0.86886795662399	0.739646356508208	0.978850956696473	0.798810511927661	0.911492648673511	0.806135305692799	0.955355957728979	1.17052524887357	1.03186075040997	0.900646759477503	0.795647534658945	0.868928455701586	0.843841398545847	0.788917971289973	0.7823808526219	1.10470307459046	0.862513676189232	0.898814112716318	0.868600260662492
Tridecanoic_acid_586610.62_PRED	1.43115313549951	1.36588557331809	1.35315425978523	1.40863837274153	1.34485338821354	1.41124187966611	1.31154175530232	1.40212146230959	1.30930285128166	1.41310394409906	1.42130941239109	1.37454612500089	1.43618229098385	1.41628723827957	1.35887222739077	1.27490604336443	1.43103932149239	1.32854891277131	1.33105378750126
Threose_(1MEOX)_(3TMS)_MP_432507.62_PRED	0.979289554706624	1.03816517023895	0.977921931807558	1.12289400832651	1.00037970571829	1.00631541195037	1.06251613319565	0.991930865549925	1.0506447725485	0.99883557938754	1.03016309635185	1.04404835818064	1.14221400226496	1.08621218855298	1.10270333815258	0.927221202130765	1.00181963363684	1.08207893518708	1.03307629714605
Glucopyranoside,_1-O-methyl-,_alpha-_(4TMS)_613929.06_TRUE	0.789817613608195	0.762994829372261	0.831089361841288	0.8006525555437	0.836463676440104	0.835846994427165	0.788244506489458	0.797717249486703	0.836724185011617	0.867091607029671	0.821130596699415	0.862944371307493	0.787693361454337	0.827344143644315	0.809186318398008	0.858473043447624	0.784103164208303	0.791586875784458	0.771496707605275
Indole-3-acetaldehyde_(1MEOX)_(1TMS)_BP_657093_PRED	0.286984639733969	0.451142535074175	0.323161551392577	0.389055015336205	0.334760162378213	0.399687770706056	0.388845493737663	0.394739724829828	0.358705872098367	0.352189166165907	0.431476349481377	0.363169769500521	0.388724842858734	0.429697365943185	0.404989862867791	0.394536772496815	0.424879061248114	0.43901263847377	0.354797328713944
similar_to_Diethanolamine_(2TMS)_335362.44_PRED	0.879669718378669	0.874777874050062	0.923719609020745	0.881158888296411	0.881630679655941	0.820805064801226	0.928783325012881	0.964267266752408	0.88109870560019	0.874875000788566	0.864673602630616	0.795441130413669	0.847785849879074	0.824577358073148	0.827971679189297	0.9536763096762	0.90511507288671	0.845386725546616	0.88266547540658
Glucose,_2-amino-2-deoxy-_(5TMS)_MP_600525.75_TRUE	0.739909862487662	0.667919266695853	0.731198571902264	0.661529196511641	0.754947854001827	0.731627083438344	0.737667313462875	0.786123933466327	0.732400469523088	0.846043081258697	0.699707128731448	0.84173993194502	0.687922167921851	0.680921385071216	0.706160032132305	0.742453564923514	0.742616474345224	0.706779938784933	0.689243127328917
Ornithine (4TMS) [MP-1.1] | Ornithine_(4TMS)_572079.81_PRED	0.981770952073522	0.941246604599619	1.06470279811764	1.00429596284924	0.999873431427237	0.976130545840539	0.997535358510363	0.967366466501772	1.0095612772067	1.00711170613923	0.9991856841197	1.02259387096301	0.979665258459503	0.998261449752347	1.02241200093551	1.07387806221874	1.04824508960501	0.965110264569393	0.972391617209578
Serine (4TMS) | Serine_(4TMS)_459464.91_TRUE	0.959045574020446	0.914993447762749	0.930087056297945	0.997773981037316	0.947814466604237	0.947950493469887	1.04472158764842	0.894285183379783	1.02141417098046	0.948623359086378	0.949859187210185	0.965324188811395	1.0302440383791	0.999810726614323	1.03087285283333	0.823134184380915	0.966657648255197	0.990950233163024	1.01288320846663
Arginine_[-NH3]_(2TMS)_582688.25_PRED	0.650553827794259	0.673323802474142	0.685567779455179	0.683649403966192	0.65465497188103	0.639722136675954	0.688788737289504	0.717959196243305	0.638499309811542	0.66440302767639	0.640031806182555	0.571205668262283	0.644270927367574	0.632120463842945	0.617237950420209	0.657043516376813	0.668089576590694	0.581508167207751	0.643613947762167
Glucose-6-phosphate,_2-amino-2-deoxy-_(1MEOX)_(6TMS)_MP_785377.12_TRUE | myo-Inositol-1-phosphate_(7TMS)_788938.62_PRED	0.74842030437538	0.802751348096131	0.762282437345238	0.754146376283455	0.75953133037492	0.755359127740592	0.787140169015747	0.80725309530463	0.697305062922562	0.775186874835057	0.761875992876723	0.738592533649122	0.746248496307192	0.65836328686608	0.703208052230522	0.809956257048302	0.686554464570023	0.770280772885121	0.729273395059994
Docosan-1-ol,_n-_(1TMS)_890459.25_PRED	0.883330542463765	0.804147912055279	0.961951815527432	0.863122050212382	0.898464442918068	0.810096302286342	0.956025018317332	0.980712189853978	0.898471486723749	0.882649142698483	0.810755134297755	0.816940202944239	0.823726911836476	0.814157826629285	0.870811775001552	1.02194201079466	0.908211471196023	0.847545025901946	0.910716429643845
Xylose (1MEOX;4TMS) [MP-1.1]	0.638695523715503	0.677785673061081	0.677187443974632	0.68183726417884	0.645682160220671	0.630756659815207	0.664474345652093	0.700412162841751	0.631459846433648	0.627834823436862	0.666441581627121	0.632569296281609	0.69308891608369	0.673412438411917	0.668765482053665	0.654390456219234	0.696202874250809	0.696166542867499	0.651201987729629
Pyruvic_acid_(2TMS)_209817.64_TRUE	1.06185282449042	1.12208453881548	1.10353073526167	1.12104431388328	1.13735754466949	1.05179859807779	1.12769861133271	1.08137751008473	1.12452937253738	1.13677718156924	1.0924292316615	1.08871701000701	1.11938941573354	1.08782382601904	1.08493718569504	1.10876899444402	1.09484626554408	1.09601218769644	1.14430614895349
Melibiose (1MEOX;8TMS) [MP-1.2]	0.278960686236701	0.231481834589801	0.306848554211671	0.170095859191028	0.0921029273501591	0.344654986046704	0.232782897567459	0.305052312094923	0.148650117405438	0.213376567643978	0.269419592753668	0.172902134336288	0.173274020840885	0.2036126399976	0.24893070901898	0.301388068862902	0.241332338431557	0.278813905168682	0.284204995975983
Adenine (2TMS) [MP-1.1] | Adenine_(2TMS)_679386.88_TRUE	0.862544964302784	0.867904362946974	0.877385797825528	0.833916985874983	0.845872424324269	0.840743402795658	0.873555591814439	0.87099439178104	0.81985849701496	0.871026143879281	0.854816231250914	0.839238186037512	0.815947368553502	0.805008888352634	0.832526932933078	0.879622076567422	0.809259129852284	0.841827416986335	0.802384634705801
Uracil (2TMS) [MP-1.1] | Uracil_(2TMS)_392037.44_TRUE	1.04515787318362	1.01696472702565	1.07147729521933	0.992536656165739	0.989338755084458	0.896541336792992	0.988529770605901	0.972151968402974	0.95035329633806	0.982916798702921	0.953867316909522	0.941873223531324	0.948692025158706	0.939444078022746	0.931571857134655	0.967886172774675	0.926452071235972	0.99629717612363	1.01914653896368
Galactopyranoside,_1-O-methyl-,_alpha-_(4TMS)_585464.62_TRUE	1.36552866963504	1.30623879397862	1.29166982941905	1.34724808093189	1.284629169389	1.35668927306007	1.25007792068017	1.32759258975673	1.24666947501189	1.34715437013308	1.36737764500333	1.31632025910452	1.38130591998717	1.36077706969286	1.30156878424569	1.20200265711732	1.36578228367079	1.26732813374554	1.26510703542299
Dodecane_260776.19_PRED	0.842778890469842	0.716167605365489	0.893444318940803	0.771849905983821	0.82077673096721	0.731959042175289	0.895173083783136	0.92541236364876	0.817919278861009	0.801270317147611	0.744460428390651	0.768095321737977	0.742935269545106	0.758647917697254	0.883905404108446	1.01505074875247	0.890969727843572	0.825445918611369	0.849865004249651
Gulose_(1MEOX)_(5TMS)_MP_584150.19_TRUE	0.82330962139766	0.803902295971742	0.876745821319254	0.84246573205554	0.8651383657868	0.759737510550363	0.859785428177642	0.876638882882215	0.868305500759058	0.832119340107818	0.780605462525696	0.786138465516432	0.79029282951864	0.77252801868318	0.751016287743594	0.91863639042636	0.814570689993311	0.794700763055929	0.827708665486762
Aconitic_acid,_trans-_(3TMS)_600462.25_PRED	0.812232563628148	0.732801300781542	0.768782356578638	0.757576481144935	0.771110705390306	0.820090805342893	0.750519689705515	0.809734466767923	0.747055967782311	0.842134614975028	0.812700963842841	0.863845648457428	0.810731801925512	0.801702505484968	0.776817702811739	0.771868369059657	0.812200809925132	0.746492595230894	0.731449017887943
Dodecanoate (1TMS) [MP-1.1] | Fucose_(1MEOX)_(4TMS)_BP_528624.81_TRUE	0.831813740200036	0.92159648807421	0.933900043628386	0.907718658846172	0.894029546442982	0.836192519011924	0.883629487240021	0.915547516773606	0.903509652420801	0.909511269583684	0.867165162438515	0.883849038868544	0.848058526018498	0.836137811092129	0.919298464402888	0.858945848594662	0.857700288974504	0.849561726153404	0.829745012159078
Norvaline,_DL-_(2TMS)_302242.12_PRED	0.812309305517234	0.829654330005491	0.870884948019098	0.839492142814883	0.798236667382568	0.810451565189202	0.840061673050875	0.783936871847593	0.829182102048998	0.886523062335046	0.838912824754348	0.82032492241832	0.8193058448031	0.871669651372817	0.880921531948284	0.853357807605966	0.817294812075287	0.844621846105023	0.814573273933693
Gluconic_acid-1,5-lactone_(4TMS)_625723_PRED	0.333501829673497	0.396781549119885	0.302246024706723	0.328351858985909	0.170810689852434	0.4405319488868	0.303453082013856	0.29890039969165	0.218101409816316	NA	0.374185445723556	0.407569620419738	0.316629985339267	0.423766361236826	0.40325708531057	0.267908193034186	0.367514554172482	0.35415864047374	0.320164318663557
Isocaproic_acid,_2-oxo-_(1MEOX)_(1TMS)_BP_289992.41_PRED	0.956081010167524	0.913414213365885	0.933821396802603	0.935151288228166	0.817657862644578	0.916780084524963	0.961594961840579	0.825613633959127	0.981317949333299	0.972244865192747	0.940009266360709	0.97054108697447	0.984626116784546	0.96725368783909	0.959363419587686	0.755392470694275	0.907147417641707	0.88294357689028	0.994818446654509
Caproic_acid,_2-oxo-_(1MEOX)_(1TMS)_326540.84_PRED	0.739327429784565	0.795848125071662	0.767154459992326	0.814677431485171	0.781877140114737	0.748781722725017	0.818173173537045	0.794922439787562	0.719608737794362	0.773927654813936	0.790825990737851	0.734421846073686	0.802515360577677	0.744342910462697	0.732701388788945	0.751897906963768	0.805095640169414	0.764284208088809	0.773656173917753
Mannose-1-phosphate_(6TMS)_785522.56_PRED	0.702279833468327	0.755637109076866	0.714746833616119	0.704294198309182	0.70000030639288	0.712028577221123	0.727712545197401	0.744762602416202	0.628191066355406	0.719390374309966	0.709239929951026	0.670616350159636	0.697911530319448	0.612657939625835	0.648986641421454	0.753249324689249	0.654685227702095	0.721033538147361	0.674857859661505
Butyric_acid,_2,4-diamino-,_DL-_(3TMS)_438050.91_PRED	0.86460250729893	0.867876300304054	0.81713435086927	0.863309453641687	0.805441901103851	0.794244362964202	0.847486378452679	0.808773384805231	0.845658162714564	0.887056921596329	0.869618961470276	0.829694189316239	0.872098895577293	0.786080099894634	0.78807855380311	0.712713925863618	0.816262143519637	0.862409442744225	0.845918651715941
Calystegine_B4_(1MEOX)_(4TMS)_622338.06_PRED	0.322346407349605	0.40390460494899	0.245491378785021	0.287889057615295	0.203393670302163	0.430985568759023	0.232782897567459	0.369329324245426	0.121848300404143	0.374527327139562	0.363939447959405	0.391101477330031	0.251202824837426	0.390840608886027	0.406704206271631	0.375282114629659	0.358432218679606	0.348235759476602	0.203599003062907
Glutaric_acid,_2-hydroxy-_(3TMS)_488906.25_TRUE	0.653635128986478	0.647824845258166	0.681043456012479	0.671938976749404	0.668746972545714	0.658387622808728	0.706039070349144	0.65976900837102	0.617775478062581	0.666426627940982	0.665686160885796	0.632917357354034	0.675246791186799	0.629857490685862	0.658018383123821	0.605353349650191	0.618821009470881	0.685899646390562	0.621979548905592
Maleamic_acid,_N-ethyl-_(2TMS)_459686.66_TRUE	0.896257432606146	0.877636473403347	0.87711940793548	0.957025530145217	0.897621138057469	0.895354574638864	0.989238260917245	0.814200126640627	0.965860917272122	0.905555156149554	0.900884333643387	0.921834138301471	1.01469269992689	0.968018653867945	0.994496892954897	0.718904084195176	0.905192203713971	0.940322416748859	0.959098118140242
Guanosine_(5TMS)_960132.88_TRUE	0.454171110179377	0.446800897832522	0.442743792925389	0.431568161228417	0.401346501301844	0.401670269557507	0.28443051998042	0.470811676823306	0.324562158219748	0.395793500279819	0.487555548173229	0.44404105803315	0.41977232506431	0.429697365943185	0.34008077302636	0.367785373721784	0.505301604742592	0.419286531891265	0.384894150747769
Indole-3-acetic_acid,_1H-_(1TMS)_668169.31_PRED	0.802444386310202	0.757802920738481	0.852473665879444	0.767526496649744	0.774837829991934	0.791242243352587	0.864441449231603	0.82935113840359	0.797276601539334	0.830780766093555	0.797894002217089	0.764397908424278	0.759544882748144	0.792930759411122	0.816187832525709	0.890242001300613	0.81658552045302	0.772774451255302	0.806418848897861
Alanine, beta- (3TMS) [MP-1.1] | Alanine,_beta-_(3TMS)_394745.44_TRUE	0.776485885255037	0.774295709081197	0.809015954289102	0.764366769970018	0.771180412125952	0.72995685254419	0.839143688702882	0.820511578742743	0.753762008654867	0.754723668958931	0.72866356736248	0.64755411141501	0.796488708635901	0.721946055541601	0.720889194635285	0.73900900173147	0.799620306713858	0.681103767659637	0.752849231657997
Proline,_4-hydroxy-,_trans-_(2TMS)_446416.97_PRED	0.920413290184719	0.990329672151721	0.973968658764843	1.0710744153853	1.08375649907433	0.905869975978852	1.00376417297438	1.07992323644619	0.902545137011011	0.993881275454079	0.94766255126799	0.902903826295564	0.946734168884308	0.882860599104054	0.932063508365639	1.08852595642887	0.990192511297712	1.00351787658028	0.993324230067081
Cinnamic_acid,_2-methoxy-,_cis-_(1TMS)_527345_PRED	0.720751806080278	0.736075027847693	0.696420260671533	0.748203474145342	0.711025949237413	0.761331682078095	0.690662436565959	0.660983359009096	0.697467313994549	0.763963510585118	0.754900262586246	0.737172538688399	0.722461169679791	0.75333393447791	0.748173044935462	0.697405078803871	0.703599065704431	0.739411760838254	0.698641591420842
Putrescine_(4TMS)_519185.38_PRED	0.614406104114206	0.600020911277118	0.639870397730856	0.595405284959409	0.562580110348527	0.498581952020633	0.843361978977879	0.509820360028156	0.62677234443299	0.460403765243932	0.544507091006011	0.532456075632926	0.669378856247626	0.583790111371988	0.587672620888221	0.402702493913584	0.533726696943275	0.573407827104992	0.55582218607709
Pantothenic_acid,_D-_(3TMS)_680979.56_PRED	0.710181499666371	0.788875144158697	0.735806791145284	0.793236381515022	0.770761777715485	0.757280625130133	0.727559840384764	0.787978477580649	0.692036694305287	0.793298531408284	0.769563219116872	0.722941283391961	0.75151426834024	0.766842420322694	0.782877198271408	0.792881291429077	0.700704116223624	0.762333119759368	0.734859737518809
Galactitol_(6TMS)_590143.5_TRUE | Galactitol_(6TMS)_590143.5_TRUE | Sorbose_(1MEOX)_(5TMS)_MP_587087.44_TRUE | Fructose_(1MEOX)_(5TMS)_BP_585803.75_TRUE	1.36504194004175	1.30217756785821	1.27511357584812	1.34542027236696	1.27541871777825	1.35916713425	1.23066008256366	1.3220788445958	1.23112708600403	1.34799440611439	1.36935860142153	1.31312406412958	1.38351496753962	1.36480299778404	1.30445712497916	1.18506319204839	1.36774868906569	1.26589481692988	1.26122951236656
Glucose 6-P|Galactose 6-P (1MEOX;6TMS) [MP-1.1] | Glucose-6-phosphate_(1MEOX)_(6TMS)_MP_775879.88_PRED	1.02199207105219	1.14655175108117	0.896111624399747	0.988579924382383	0.950295650848489	0.955766447276749	0.937251380586075	0.955155487778164	0.76440806710899	1.0001054884621	1.08806561486314	1.07820736231483	0.999162437321255	0.964187005077701	0.890307137061028	0.850420952378943	0.888054824524089	0.886598161213855	1.00562397356344
Pipecolate [MP-1.1]	0.663649395910972	0.620474559856687	0.65203077264941	0.671111701224424	0.626469263656325	0.670776843889467	0.639207797529562	0.655143880514147	0.591165865019932	0.700142136496379	0.673327241000635	0.642707344509238	0.618901662770195	0.626708314796369	0.658376487182615	0.598672841004458	0.608276164395246	0.648894429859991	0.605502290738549
Butyrate, 2-Amino- [MP-1.1]	0.918589484267802	0.936113252756058	0.909038810301206	0.907134246444752	0.903035221624022	0.878139310406452	0.852768841115396	0.935696279807197	0.856330476379551	0.941227612350717	0.895938025443185	0.892858700596867	0.937710118805782	0.864293360881882	0.859973880326748	0.8972324008595	0.911624776583404	0.874526529124716	0.904456121003597
Calystegine_B4_(1MEOX)_(3TMS)_598843.25_PRED	1.01485377537623	0.995765783298484	0.942692527569219	0.993461596580662	0.939210904571938	1.03940781235079	0.91936785933423	0.983118965371251	0.905661659976914	1.01596267168771	1.03663547214393	0.982299318041008	1.0383543242774	1.03485239730263	0.988037921574776	0.859496022522691	1.03248202710489	0.955961764491471	0.929377347054722
Epicatechin_[-O]_(4TMS)_963441.19_TRUE	0.474542385194014	0.470146866333856	0.478997594626063	0.46319033142377	0.422651438158667	0.407474149350585	0.307918533743149	0.444923272111316	0.313347090302921	0.383956323618769	0.478189377565758	0.428192352581612	0.416254308417589	0.439382464358811	0.305725376264933	0.386886172400506	0.50727196034456	0.379661229789142	0.406664501917666
Azelaic_Acid_(2TMS)_605555.81_PRED | similar_to_Fructose_Derivate_604774.88_PRED | similar_to_Fructose_Derivate_608269.19_PRED	0.500306998531445	0.531710729021471	0.483456969386349	0.458219345954889	0.365196587548962	0.516501756819189	0.469289367766883	0.492817046905518	0.482523232036755	0.475617604643319	0.512134695296439	0.536431908208401	0.537038072097771	0.537908294847986	0.612077059974172	0.496875466340639	0.555758970506517	0.529843531341154	0.401595825218787
Caffeine_754467.62_TRUE	0.722944878827217	0.72818588705064	0.706941381605853	0.713345947248998	0.729634841465115	0.711558228795648	0.747114461954876	0.818431263390612	0.608320215890591	0.749384482484122	0.699502436476818	0.703479926456314	0.706890359003678	0.681444569288853	0.81251907160347	0.786957197677798	0.69476346286517	0.74368489848185	0.72690650609279
Ribonic_acid-1,4-lactone_(3TMS)_550463.56_TRUE	0.897672797902872	0.938477689763198	0.91531139328281	0.978173995599354	0.964547441014034	0.897631289695008	0.947132939831963	0.912246261185773	0.897397528773765	0.965021503915691	0.93713190668451	0.929790073386979	0.915556175844326	0.904198879607957	0.938605182340542	0.930147755113862	0.887243399429626	0.950675505261946	0.883347096285676
Rhamnose (1MEOX;4TMS) [MP-1.1]	0.328631890512512	0.630129303811136	0.488671098872284	0.427800998432103	0.414707784772565	0.434766198135893	0.496176011431374	0.517777023097245	0.343513076267612	0.479224908815274	0.606651276320626	0.632917357354034	0.475908081423586	0.581376779770978	0.606991616235407	0.459907425777174	0.434723542658491	0.490428397174155	0.595449084435355
Turanose_(1MEOX)_(8TMS)_BP_876686.69_PRED | Uridine_(3TMS)_876823.81_TRUE	0.635335439238883	0.587832481116325	0.548922423437872	0.52518959540648	0.485633729677428	0.490132223896166	0.440004483806806	0.463152796329465	0.411726391076683	0.478329961235527	0.551297925581938	0.484156741096978	0.485931685933843	0.580238055044099	0.462380676719529	0.427471401984666	0.649461359766767	0.46896223213413	0.444339221236073
Benzoic_acid,_3-hydroxy-_(2TMS)_507250.44_TRUE	0.771223108300139	0.745879124018501	0.814243330097297	0.745996262535837	0.755707058539056	0.732950795373682	0.879302014426442	0.778678485096904	0.756967467780837	0.739429612584123	0.725729055926223	0.723008799367337	0.74059128660181	0.737668845810422	0.712291000403019	0.750263857594746	0.725372498233538	0.742128737924543	0.726577546118081
Homoserine (3TMS) [MP-1.1] | Homoserine_(3TMS)_405393.81_PRED	0.759987663463888	0.817135382220395	0.769543533641941	0.865126347288849	0.867432329723971	0.731876117203174	0.829175757620059	0.853290378993456	0.687215248823901	0.803493639159374	0.761527270898613	0.741939907467285	0.762937100980684	0.664958361286696	0.734048965367818	0.852627693048958	0.794259131843038	0.787921530802912	0.812353958355187
Butyrate, 2-Hydroxy- [MP-1.1]	0.670539660968071	0.690905749403986	0.676875489133044	0.694574629346285	0.708208101153354	0.644094714451251	0.620038852718235	0.744180845303283	0.617401379418242	0.679978029311742	0.648248040102293	0.645309815339518	0.635544966849987	0.641649231131689	0.619302492311634	0.657919979506839	0.646353538841879	0.59304228409281	0.626233044833248
Glutaric_acid,_2-oxo-_(1MEOX)_(2TMS)_BP_486148.94_PRED	0.484404009432207	0.525453014902391	0.430860399279477	0.477730331357583	0.474220062273557	0.525214436691229	0.468053981327045	0.489827078946961	0.478346060768809	0.556456722536568	0.540728983375875	0.523315595021658	0.418273609612051	0.49675590635046	0.515824225550935	0.45810497976247	0.543834268623156	0.522736914268486	0.520918057522291
Nicotinamide (2TMS) [MP-2.1] | Nicotinamide_(2TMS)_455050_TRUE	0.79733587196997	0.588272778752726	0.744477795225822	0.590577765039598	0.726468172083824	0.636588449072206	0.773108972755202	0.771933105137824	0.717072476389921	0.767842508085577	0.676190895046348	0.773766062108748	0.545722604116807	0.544564176470575	0.627739097676165	0.847356133965047	0.761253940217268	0.775586575004591	0.743746495206844
Adipo-2,6-lactam_(2TMS)_492238.44_PRED	0.483898670985724	0.539514307523023	0.426126354989639	0.50873448435874	0.466441430482071	0.540507470451297	0.531903780156796	0.486021339560995	0.408677201939561	0.543601818201491	0.544507091006011	0.536017837975688	0.435884827303979	0.517080279889617	0.542511024813302	0.529669705696312	0.485582854727231	0.556591230638091	0.568505839491782
Asparagine_(3TMS)_476136.78_PRED	0.663288589621047	0.66810222786005	0.650238518702776	0.688727324132088	0.675293436375454	0.666336675115217	0.614498611080971	0.616067200448992	0.591453195130768	0.665806445657738	0.695143015971057	0.654315167588122	0.63304625325218	0.635050399169256	0.59891998179574	0.615916754064256	0.656501287905734	0.644258537830028	0.622127931695947
Shikimic_acid_(4TMS)_586124.94_TRUE	0.576334725805325	0.609848573649728	0.612213567017278	0.601132752162688	0.60503061608074	0.550635051551442	0.640922483865174	0.630135776480429	0.628544058945853	0.607665094555415	0.565258129900681	0.54311959574372	0.56710852691055	0.54168603231299	0.575879640359445	0.651475356274157	0.598658675162953	0.554976562720318	0.600043656495237
Glycerophosphoglycerol_(5TMS)_761775.38_PRED	0.406867964175432	0.502014372343788	0.475351650032386	0.407359414858337	0.367674827156112	0.472181963161403	0.317937583434868	0.404488230154918	0.335708283876466	0.456893685677248	0.480582202669982	0.34199750520414	0.457482650792205	0.47631610481546	0.371595726585763	0.394536772496815	0.482894297061042	0.367388097512745	0.325770840881692
Uridine_5'-monophosphate_(5TMS)_995880.69_TRUE	0.506638204340071	0.610749323635831	0.61309485931789	0.594237286883402	0.622157449595187	0.664702428169178	0.609943978613801	0.692906501236451	0.579138601948805	0.616093474067911	0.647543769518869	0.615846274018109	0.646995958759714	0.641202722655128	0.889925020997048	0.656603816423222	0.627009019130074	0.630582394310592	0.622720224785518
Orotic_acid_(3TMS)_587220.69_TRUE	0.568420227811551	0.562174133398914	0.592673234516509	0.544527895977323	0.53355816033508	0.50316714778386	0.594003441088856	0.529113011925496	0.523993694498531	0.498649163080964	0.552317844241712	0.513407333073191	0.572807540579675	0.540436611789689	0.543608509828103	0.525857119622872	0.527224013434818	0.537924967353075	0.55474118568415
Threonine,_O-methyl-,_L-_(2TMS)_334293.72_PRED	0.669148333102315	0.723506900373177	0.681043456012479	0.698999613731535	0.677963899355453	0.676041129749434	0.708086685433436	0.732356992622131	0.657240717455384	0.712966576929153	0.714084814241377	0.680399124073535	0.687214357178895	0.671015417446064	0.709450198692191	0.695065816304076	0.69278096772194	0.67672403147182	0.706464109315604
Tyrosine_(2TMS)_669279.62_TRUE	0.697746391114583	0.710143493808566	0.715509698150333	0.692871132752224	0.618220929859774	0.780786230198275	0.723700740491441	0.562093291554473	0.712791697218929	0.749577971030412	0.773371533370678	0.74539851623739	0.703889219786561	0.786760335598842	0.77034296640505	0.708363487738821	0.70984925340826	0.701658767198186	0.699794112738812
Spermidine (4TMS) [MP-6.1]	0.510589952208591	0.370252024655706	0.490377224966017	0.362859672121744	0.494221761060031	0.369791289525917	0.362327865687282	0.597916121069796	0.458290145790256	0.463845493975784	0.377959778678381	0.6086302905602	0.343720389602981	0.154456515530114	0.458718092694698	0.406661694839733	0.586752647777356	0.435770902949862	0.474376836792097
Indole-3-butanoic_acid,_1H-_(1TMS)_755498.5_PRED	0.683873561108815	0.69725687969758	0.662436803414382	0.672625441300394	0.681503369177904	0.662923550297697	0.700288594602709	0.752351767227594	0.596550500744574	0.72076143563376	0.654316985899205	0.645309815339518	0.667338449231812	0.645504233777105	0.785254883758999	0.756322806457464	0.645655201814115	0.683936777244715	0.677482691012086
Oxalate (2TMS) [MP-1.1]	0.68689573885928	0.614053588796247	0.659718170361159	0.635666804048644	0.700307089208444	0.616201334916166	0.725871729268471	0.734822962649407	0.668286102151944	0.671912468011037	0.668066334878195	0.593187474944617	0.631500774055818	0.639404198887504	0.695155979316358	0.772724138989801	0.730463408684348	0.696307800078048	0.71422115548362
Glucose_(1MEOX)_(5TMS)_BP_599322.19_TRUE | Idose_(1MEOX)_(5TMS)_BP_601382.12_PRED	1.08565636954764	1.03632984170506	1.00151059746553	1.06914544049428	1.00629071453017	1.10863956476626	0.971602641383153	1.04726109102997	0.954784639242165	1.07600913049437	1.11406307334246	1.06609647512329	1.11726063940274	1.10449300474609	1.05537658966365	0.926217293589011	1.09629579879715	0.997224233569838	1.00300966160053
Gluconic_acid-1,4-lactone_(4TMS)_646839.44_PRED | Glucopyranose,_D-_(5TMS)_644536.81_PRED | Glucopyranoside,_1-O-methyl-,_beta-D-_(4TMS)_646436.88_PRED	0.665263833810949	0.741552264895912	0.704534552225758	0.718182232281278	0.673648885898502	0.705998406406374	0.653869844188525	0.722155620570691	0.582633711301287	0.695476862958143	0.755408619524568	0.671721914299514	0.749497681886787	0.730063718543056	0.76415475282485	0.712216833437507	0.711287385464585	0.702341492337128	0.649303379357413
Putrescine (|Agmatine) (4TMS) [MP-1.2]	0.47239311132015	0.41323340183671	0.524077410171168	0.45001249225311	0.441756900062949	0.378377615235066	0.67328019439264	0.412621488951022	0.439418739418225	0.34754974576396	0.395614674622682	0.396932854079563	0.51455543176513	0.453616653057081	0.535764361185947	0.392862161134903	0.477853141639684	0.442508514238695	0.485932002838444
Cystathionine_(3TMS)_766080.12_TRUE	0.26881671188842	0.35524387863955	0.277356711267656	0.244025711830905	0.15980275983327	0.303065887461823	0.364507976475884	0.324213492406636	0.224429814169136	0.265226312104302	0.422095544364833	0.346581850343429	0.24846935317802	0.18570907188377	0.246644901046236	0.375282114629659	0.345857530183596	0.326646241168649	0.271823813009365
Diethylenglycol_(2TMS)_306329.94_PRED	0.694757665820622	0.706758268514368	0.736714919491442	0.717278744266493	0.661331213261263	0.707937544544273	0.690848768687891	0.651041084992791	0.690864031107279	0.74909385194007	0.716223212072726	0.707454534930821	0.722953424213372	0.757837547454445	0.750814854267189	0.696688263266661	0.714479785040974	0.699108552497012	0.675188095466824
Benzoate (1TMS) [MP-1.1] | Benzoic_acid,_(1TMS)_349981.84_PRED	0.631692829383384	0.582457525017493	0.655389295483219	0.595616825375387	0.615818228889933	0.600750962244428	0.682467566033236	0.699181886180273	0.683143246508712	0.615887589630673	0.577675551147744	0.581615337641813	0.599576507286814	0.587265473511796	0.625122313353828	0.719863918524583	0.641762711309845	0.614569467876496	0.611429243654148
Glutarate, 3-hydroxy-3-methyl- (3TMS)	0.311792329224927	0.339412774577136	0.311340168524807	0.302792288603462	0.264008438005062	0.350190423210896	0.337740102229946	0.327821613579314	0.278087042027001	0.275412359766231	0.304671539896592	0.279971910940857	0.333235637437112	0.332060650236598	0.288924052242077	0.392862161134903	NA	0.375045136323907	0.392632083439019
Inositol-2-phosphate,_myo-_(7TMS)_863697.56_PRED	0.352801784552936	0.436694329193753	0.360754390644956	0.37607636541096	0.344078155261422	0.355540279638727	0.393537067861881	0.429985689934087	0.341316420872561	0.407558233533517	0.432011594768313	0.361996080263019	0.41109731496904	0.335830522839382	0.42214062598914	0.421746906691615	0.413760989566673	0.358340064806614	0.429161088845375
Glutamine_[-H2O]_(3TMS)_MP_494765.41_PRED	0.315825458772798	0.613296775096062	0.311340168524807	0.47188671550453	0.464262044782484	0.472181963161403	0.376060612407315	0.240710211819365	0.341316420872561	0.516148564587105	0.610954826725126	0.208989432043036	0.418273609612051	0.458558986117019	0.392449901831134	0.319288189692244	0.287912643249607	0.38896498269975	0.31437480104691
Octadecan-1-ol,_n-_(1TMS)_754094.19_PRED	0.637443079661965	0.66746099608281	0.639679909237689	0.637930172081084	0.671154357274883	0.630130205211991	0.66808917485461	0.715032904477342	0.547432231919282	0.667198808152885	0.617882580852919	0.618014903245641	0.62295982111283	0.6121231676968	0.752817947306926	0.748202026147564	0.599576410439646	0.652587222815402	0.640966262557454
Maltotriose_(1MEOX)_(11TMS)_MP_1072282.38_TRUE	0.931204906729668	0.762262813974047	0.753902679686242	0.72887983098195	0.759308545443927	0.347446703391654	0.610806543148643	0.699674965356568	0.429038990000345	0.625313910707901	0.695563292785482	0.662082241066608	0.691120453274077	0.765091651019609	0.448523594644496	0.621256719433307	0.900937202730462	0.615707955958148	0.585157485009159
Nicotinate, 6-Hydroxy-	0.167876705770739	0.430476312607987	0.262104170776172	0.346442617854155	0.271398133092031	0.256748366257957	0.297326663565475	0.331361652915596	0.218101409816316	0.289015359960707	0.345882865352065	0.420080621076938	0.384484136461936	0.400100003635059	0.51009199908622	0.374360493987604	0.378645682464381	0.513465761461137	0.318529361324748
Cellobiitol_(9TMS)_870156.12_PRED | Cellobiose,_D-_(1MEOX)_(8TMS)_BP_872226.81_PRED | Maltose_(1MEOX)_(8TMS)_MP_871061_TRUE	0.898282567256835	0.757533706007436	0.722605312546249	0.704523344351574	0.680937041473616	0.672831408267202	0.53408645886197	0.622491757289506	0.531082971330741	0.600620505121867	0.716223212072726	0.711408943582806	0.657232672373324	0.795050758857065	0.47680414066986	0.590837338922324	0.859219025326591	0.631515418367215	0.558390022695864
Butyro-1,4-lactam,_2-amino-_(2TMS)_452058.31_PRED	0.781685729121651	0.843463762847288	0.853081205447113	0.92151766144097	0.913927350080825	0.788240840792945	0.846443746558865	0.916325041792716	0.748046578349893	0.859625331069329	0.810703611130464	0.765238317052523	0.808234786462612	0.753110989563342	0.787597996508187	0.948751987427602	0.852276304271469	0.86501809043147	0.829330384119451
Fructose-1-phosphate_(1MEOX)_(6TMS)_MP_762927.75_TRUE	0.73531435373458	0.802792588515647	0.669552534692767	0.649693142621414	0.589346622066527	0.658387622808728	0.528357121088094	0.625440604141054	0.4705266892947	0.613606889994842	0.754244306718705	0.662858774482783	0.695034595247271	0.711963161806245	0.49700623546286	0.535864309013079	0.624256812117633	0.646071177290075	0.603206988274136
Histidine (3TMS) [MP-1.1] | Histidine_(3TMS)_678782.75_TRUE	0.398806849499597	0.356978740820133	0.352932558759086	0.314493944183852	0.360138371647575	0.450509516717014	0.410354512035343	0.388379233729595	0.265225433329307	0.372089333046983	0.392916086290081	0.379849997263097	0.337345984092865	0.354125831722336	0.365105718221419	0.400288161201696	0.363939089686	0.368364317360073	0.329669714652032
Cinnamic_acid,_4-methoxy-,_cis-_(1TMS)_617496.56_TRUE	0.563043755951106	0.531300674081719	0.597514882687145	0.554396443496164	0.621845588161611	0.570746379561033	0.597734586192099	0.548268258854795	0.591022032998373	0.619557308355126	0.546099676487194	0.598543157456449	0.561423790264076	0.561564404358331	0.541406014128194	0.633015048170068	0.549747284466307	0.557232824548745	0.549681937437559
Ascorbate (4TMS) [MP-1.1]	0.429027790860292	0.45278316461733	0.355576475065166	0.297207295052931	0.231093773227162	0.709662848972217	0.517290712162879	0.481350147604281	0.506013393770044	0.322328724349783	0.444848072593468	0.61648704060109	0.403052487951966	0.463691180754358	0.624682021385549	0.388612197918684	0.371881611379989	0.32476929626014	0.410617682014934
Cysteinesulfinic_acid_(4TMS)_638681.5_TRUE	0.616072040009699	0.579858731143813	0.578671276769252	0.579587112217369	0.583104983777189	0.48670006784775	0.575176015278928	0.578759494612344	0.571465518281051	0.615887589630673	0.576803885237085	0.490813060675316	0.595604663079002	0.515623562231954	0.507375978161784	0.651475356274157	0.588470049692697	0.554489154104981	0.564651553283704
Norleucine_(2TMS)_337195.69_TRUE	0.625746138303301	0.649466071765038	0.644755977152276	0.627730509933327	0.607070038306471	0.608483434755951	0.655229072382718	0.67776149336801	0.590878089435878	0.64100228957273	0.622396669716809	0.607148830290671	0.609838056446509	0.605702790522695	0.645343668385043	0.658574774278673	0.654851120501642	0.611573185008377	0.655185686158282
Linolenate, alpha-	0.703574181234324	0.815192230639885	0.587954172982545	0.6800721547565	0.65307952101486	0.664828735342565	0.638468046927807	0.653261424735938	0.535015644170167	0.67897171314435	0.767153577343297	0.760831930696313	0.688526499800137	0.658664439811894	0.651245745150182	0.535864309013079	0.627981350840267	0.589901452804682	0.694152895213449
4-Hydroxyphenyl-beta-glucopyranoside_(5TMS)_872154.19_TRUE	0.84310062216846	0.706175251720677	0.662099134890257	0.641067561914054	0.66333795621975	0.608663051100454	0.535814278182928	0.57061139215006	0.547614118474292	0.580921539467324	0.686943210599032	0.654518912335915	0.613176417564293	0.752552272575508	0.470616244805217	0.518891236529217	0.82509402692051	0.577719271400613	0.540289096338263
Guanidine_(3TMS)_266995.5_PRED	0.589787894550756	0.441299678667887	0.596316209910827	0.477113348137513	0.510003217482137	0.491260066789912	0.613935366636248	0.654205013574466	0.584133034595121	0.527034436925823	0.483329858579004	0.49799678391825	0.490564788720246	0.500281844521131	0.603258319690182	0.709544253846614	0.632195350428669	0.605417241037042	0.519336546760005
Pyridine,_2-hydroxy-_(1TMS)_208781.09_PRED	0.387736339751546	0.380569098860975	0.352042853135023	0.339872639576603	0.313766516655036	0.390095839242093	0.405206756580855	0.373577426905499	0.32212782543236	0.378517378502528	0.402811928482874	0.385058645638407	0.414723753354999	0.390840608886027	0.40325708531057	0.415850865644936	0.444599273773863	0.352028684215699	0.454927056412862
Spermidine_(4TMS)_728678.88_PRED	0.379637718025565	0.233881131269154	0.340072772234365	0.255869310196923	0.400832643419524	0.132539369472089	0.282753519578963	0.442998983257017	0.368503144204247	0.34754974576396	0.240772467226189	0.503125286495941	0.0523860465084098	0.0284587171529283	0.34390261445255	0.207024561272948	0.484691340578111	0.332757036319997	0.36072190363022
Fructose_(1MEOX)_(5TMS)_MP_580248.19_TRUE | Psicose_(1MEOX)_(5TMS)_MP_579668.94_TRUE	0.369198740052236	0.381068796653666	0.317880943997951	0.322052027722808	0.245921336461218	0.305483950467899	0.266935718178663	0.341597819598537	0.306810667916882	0.306455727035437	0.405351769611588	0.311478361945418	0.318457229450382	0.325838959715572	0.288924052242077	0.340141696509549	0.396727241966784	0.272941554924967	0.284204995975983
Tryptophan (3TMS) [MP-1.1] | Tryptophan_(2TMS)_789997.94_PRED | Tryptophan_(3TMS)_791196.94_TRUE	0.528323200745729	0.475083712653423	0.55800179819178	0.450730988815992	0.498826280992974	0.542149911417326	0.475940587697858	0.530331305288111	0.463796699616933	0.550295456147857	0.557323236715237	0.531819550926914	0.497909566537149	0.50711014606792	0.553849098294812	0.430272383764476	0.550052923171789	NA	0.533576180171794
Fructose-6-phosphate_(1MEOX)_(6TMS)_BP_(Derivate_not_found)_768948_TRUE	0.829535327312057	0.964981865746457	0.719774595605853	0.799314785313958	0.760345923782587	0.771614084296351	0.765549338100748	0.77409825543548	0.607926546146981	0.819365324734962	0.90719600680131	0.894024012377279	0.814907639158561	0.788426061411814	0.724607669680371	0.68196821112756	0.721255739896664	0.716518467894543	0.817259569585685
Erythritol|Threitol (4TMS) [MP-1.1]	0.511023548877504	0.603137054141423	0.583370508208582	0.597404817197845	0.558011283809216	0.532031720949756	0.582002101220401	0.592763856284526	0.524406172922797	0.531739134394227	0.527062255258815	0.524874246703176	0.590278827900772	0.564651273288094	0.586559340051847	0.624651565973973	0.582508833726147	0.577293018263768	0.567499644987334
Cysteine,_N-acetyl-_(3TMS)_554708_TRUE	0.73411621430072	0.763255497600469	0.770301614907924	0.79728904291272	0.783709974196449	0.744010732247257	0.770219132050526	0.761248653620297	0.723455084783226	0.798872414639884	0.76796078243115	0.76381765937723	0.7422062796642	0.747780871358745	0.785010536843128	0.776469867741902	0.748480920383147	0.771690799823077	0.73958839353495
Riboflavin (brk) [BD;1.1]	0.620052727945209	0.580320252793874	0.67197220918777	0.561325679038408	0.681503369177904	0.660865966852844	0.678528899595661	0.59145337469159	0.651201421200731	0.674888157305845	0.532897537303287	0.486684116650908	0.5695746562695	0.521842941000022	0.59525739777091	0.654835124538088	0.594231130662442	0.51470412747509	0.592318562917771
Pyridine,_2,3-dihydroxy-_(2TMS)_359008.03_TRUE	0.590886251333403	0.603002756730789	0.636411459772042	0.609636203282529	0.605201428124002	0.575677895984359	0.657917979726269	0.611396008492278	0.583234894707919	0.6091693740129	0.584693171140273	0.427000477302214	0.577931882104048	0.591886830231513	0.556563213149507	0.605353349650191	0.57395864156745	0.45783801008144	0.576739856622527
Alanine,_N-acetyl-,_DL-_(1TMS)_320211.75_PRED	0.661655643043801	0.58797937437767	0.754829753589166	0.645672106878008	0.621845588161611	0.599424991724186	0.725408653776388	0.7542020437484	0.652858710911836	0.652922655282891	0.583649250361842	0.592154587813463	0.593140255338011	0.589592736257175	0.668597708212231	0.744716889919801	0.67937636170998	0.62007655127362	0.640298120089514
Glucose,_3-O-methyl-_(1MEOX)_(4TMS)_618213.81_PRED	0.527537244681312	0.560627826826814	0.516483241578724	0.515832196523313	0.460198667259014	0.531741294836401	0.497766641624021	0.523530621048075	0.469144588980977	0.497847566381048	0.553835776158011	0.497213713489695	0.567728459277893	0.554250762139818	0.567613892151907	0.46868000702235	0.523699945299903	0.545467824328539	0.507003206185602
Gluconic_acid-6-phosphate_[-H2O]_(5TMS)_762561.19_TRUE	0.856281885080196	0.868520566104995	0.692729190070048	0.742794741095744	0.707521460423033	0.683401009370917	0.765050864956462	0.725188748131971	0.625581736024053	0.783040165541772	0.834658097872363	0.807291917092903	0.725796530448932	0.681792416431428	0.642999674183055	0.711718482016993	0.678800468257591	0.671902654273481	0.76512111185031
Eicosane,_n-_695693.12_PRED	0.559801781953228	0.672702098934305	0.827088174702547	0.642453384273469	0.657766238540368	0.621257378854913	0.7708249099017	0.820252797296762	0.701478170451839	0.652755514117354	0.574160372608072	0.644446832528822	0.607737728845523	0.539598244256039	0.747968023584472	0.696688263266661	0.660718908755187	0.609231841448423	0.596308958225303
Propylamine-2,3-diol_(3TMS)_315724.22_PRED	0.628193435727861	0.664311388262688	0.660742310159343	0.63717891670742	0.603313776657666	0.616372476064197	0.605274571757945	0.625805972355046	0.5933100769415	0.660445142435731	0.617882580852919	0.600525580626931	0.65281506567492	0.660459620529173	0.67709829091974	0.616996403672043	0.644249944523103	0.61273186471191	0.615170506027602
Chalcone_methoxyamine_(1MeOX)_706113.94_PRED	0.337066916154907	0.316186762567977	0.271953638051056	0.267643596850015	0.252912567966305	0.362405385634189	0.328761522872237	0.288176537078801	0.236473944085531	0.299190933133352	0.346789935241795	0.316968939796819	0.259146261740995	0.321009611415156	0.323816888231284	0.304047104562865	0.338684470479868	0.295303042471254	0.225709527781344
Sucrose (8TMS) [MP-1.1]	0.599692628496363	0.711705085578002	0.548612027072485	0.563871789435601	0.588040098227884	0.579386900640432	0.571666302795985	0.653576481936072	0.547614118474292	0.621962131429614	0.643542221234248	0.598685543781161	0.630793558864256	0.618168323267537	0.606991616235407	0.559581273133305	0.705707855152398	NA	0.750706794800705
Glucose,_2-amino-2-deoxy-_(4TMS)_BP_659366.94_PRED	0.594140345564696	0.45180069769371	0.49499010992386	0.467591750226027	0.417079720479285	0.542964836278713	0.472946867018751	0.385773406859688	0.442326609038664	0.55059377144126	0.548979343452731	0.54993106489628	0.44596975562751	0.510166558196971	0.539547322701741	0.4605045905674	0.503308364127299	0.501227846751639	0.519336546760005
Proline_[+CO2]_(2TMS)_534232.75_TRUE	0.639111010720773	0.548649354922355	0.686014229906561	0.621810356456539	0.649350510742146	0.620758922108478	0.662097193431286	0.516474125370958	0.588559680346928	0.665028145107413	0.575487523906231	0.572875654007686	0.593140255338011	0.488600415676524	0.51967652278598	0.511209397592224	0.531018694597786	0.444385459147205	0.602876649974715
Allantoate	0.486908929951872	0.289256102877612	0.506630913080339	0.392405834712121	0.513397125807901	0.394277452407736	0.404334720714392	0.630847794483356	0.395953406287417	0.503383868574598	0.377211917986889	0.641830744550475	0.26796276615663	0.36380607495819	0.445200863315348	0.592977778881517	0.498840000549346	0.471633069956126	0.531610601994739
Calystegine_A3_(1MEOX)_(3TMS)_MP_554707.88_PRED	0.62973308291809	0.556079634431516	0.649335887523122	0.604583144916964	0.610253895339695	0.567526893615384	0.649265699780318	0.676651333214112	0.606210929390791	0.617119314262547	0.57237374425235	0.576003252432384	0.553307566005284	0.561197320498931	0.629460307739292	0.678060125413159	0.620652140998345	0.622383148310107	0.61988905112862
Melezitose_(11TMS)_1053876.5_TRUE	0.514453984456193	0.531710729021471	0.598230403620864	0.592093770718566	0.708208101153354	0.738695814433144	0.613935366636248	0.71412324684762	0.709780841023784	0.691895278668584	0.62140435883644	0.75028362079837	0.597688633607695	0.50890009845704	0.759256870532146	0.62099313513756	0.64894728223478	0.58412465504358	0.629393140985456
Dodecanoic_acid_(1TMS)_528526.38_PRED	0.517818127258271	0.597263758465571	0.597275764021458	0.591877989211806	0.554228358341951	0.574125244770417	0.517765250910421	0.591014505442138	0.592312526362562	0.618139234977067	0.576366286181934	0.587349550632611	0.511124602418133	0.52324468747163	0.619757709450905	0.554839702797272	0.514559548360113	0.554489154104981	0.522225297156075
Proline,_4-hydroxy-,_trans-_(3TMS)_450628.06_PRED	0.701121167144148	0.75574606082286	0.733055553382249	0.835073557282681	0.820883347170322	0.694156573294305	0.754789016735382	0.811234861317865	0.654194447530871	0.75044605786373	0.747381988650342	0.682650193493092	0.724502788204998	0.671015417446064	0.715333987945263	0.82622554354486	0.757921484290532	0.787550608400743	0.760830251330588
beta-Galactopyranosyl-1,3-arabinose,_D-_(1MEOX)_(7TMS)_879025.31_PRED | Maltose_(1MEOX)_(8TMS)_BP_880335.56_TRUE	0.727249843691392	0.60407416224366	0.584655096162425	0.530301513306095	0.469307958052084	0.490509057849874	0.421837397042004	0.432047430666476	0.372281701445533	0.448598825495807	0.558306010912216	0.506376134314804	0.498221738963158	0.611989196650709	0.357188144640091	0.414348830508691	0.669617779812353	0.421436709790508	0.449123105272436
Pyridine,_3-hydroxy-_(1TMS)_283546.44_PRED	0.470763561457304	0.462614563101188	0.52862807500732	0.444652772039664	0.445028431409675	0.441558248920536	0.470516572779568	0.538644789534726	0.446134234135653	0.477880782418477	0.462153785645784	0.430940688783572	0.470110789585572	0.443252030570802	0.474020880461486	0.542263755882952	0.499661131722424	0.483899097660737	0.453013428194855
Butyro-1,4-lactam_(1TMS)_241244.02_PRED	0.452966337394811	0.393568337003235	0.391301935416226	0.345147923238449	0.34477587980677	0.466596848454322	0.448461036124823	0.367891642738494	0.482006197678671	0.371269137749756	0.454896030488813	0.539301947841794	0.378869725111203	0.530743410572592	0.468886567088532	0.300044953427028	0.389876909966896	0.499886825687296	0.365196884385323
Glycine,_N-cinnamoyl-,_trans-_(2TMS)_737734.19_PRED	0.553470576144603	0.650889196816935	0.532054512935464	0.567252138427676	0.569952996684041	0.551407881658568	0.545448238346168	0.610209809481323	0.510729823568553	0.582421563486222	0.598833337993176	0.552954516209435	0.64387800595044	0.62136093491805	0.6240193195874	0.538689710443929	0.597272804204215	0.601391602762376	0.56321017413042
Pentadecanoate ((1TMS)) [MP-1.1]	0.489868020558116	0.481816843569895	0.613314532854619	0.475249431990266	0.49821891766924	0.536889776972221	0.59305879700589	0.615296700316422	0.545787182322563	0.524634279025058	0.501359057230278	0.529680071187933	0.49602425926521	0.498392864891286	0.57041651514314	0.549981044896134	0.535397752870371	0.447773567203173	0.494053459861977
Orotic_acid,_4,5-dihydro-_(3TMS)_616339.19_TRUE	0.431780243019234	0.410320579404163	0.457494433485639	0.41628532152556	0.448641137090492	0.513922482813942	0.469903986173272	0.43509817298292	0.40479389681843	0.468174325096279	0.483718601987473	0.459499800484075	0.431304031525898	0.490321995751198	0.434800689729706	0.370630227817216	0.450699356873737	0.385480516188655	0.446348207776595
Glucose, 1,6-Anhydro- (3TMS) [MP-1.1] | Glucose,_1,6-anhydro-,_beta-_(3TMS)_558133.69_TRUE	0.402884060973874	0.532119792291718	0.467358797301937	0.473155207742187	0.453738164288261	0.450992388810803	0.440004483806806	0.492817046905518	0.481747139416752	0.445924768904854	0.487555548173229	0.512454969436359	0.461410511798743	0.467023933401158	0.541035986961842	0.513955009312657	0.407569757892544	0.512218300878481	0.444742842833471
Maleimide,_N-ethyl-_235945.08_PRED	0.44173089255856	0.403030455304168	0.468794437064251	0.37932172156207	0.406408172698536	0.446593023103384	0.441440981540309	0.405671934514162	0.445505029416072	0.381645810072202	0.422095544364833	0.533721878043677	0.398034061459825	0.494547073027081	0.45113331581201	0.408223335158673	0.429871881386507	0.480160242696283	0.421515653463151
Melibiose (1MEOX;8TMS) [MP-1.1]	0.413058446532394	0.438480487077476	0.344768057637889	0.325955221286565	0.329541630025632	0.350190423210896	0.355629282873072	0.393484760160078	0.254958380548198	0.321241017720958	0.373419905045167	0.335911763584042	0.364990723483325	0.368131722658074	0.376811287324323	0.331145128520184	0.349825709001099	0.316387317958388	0.371400020448442
Spermidine_[+CO2]_(5TMS)_822511_TRUE	0.450531486899265	0.358125508465567	0.402516925094007	0.386671245877744	0.457186476536677	0.384344258025673	0.365588488456521	0.442029386687707	0.367546362629381	0.43537757873134	0.390862212425583	0.404403603149945	0.385706722236923	0.443252030570802	0.461169041235962	0.464050013466936	0.546660580973109	0.363926456603181	0.441076754742511
Xylitol_(5TMS)_501235.88_TRUE	0.4984549707181	0.449818476807906	0.488242116003204	0.454280503878401	0.400317356167124	0.397005537732207	0.348679445375825	0.393484760160078	0.298650443331453	0.392907693002715	0.47204787449591	0.410676613943064	0.429436181163649	0.404537331550536	0.352482795462563	0.389469565930313	0.467303580816129	0.40655965475251	0.413525806415668
Cholesterol_(1TMS)_1079629_TRUE	0.129805327461858	0.36757134129397	0.372304552594684	0.206679737494675	0.44784438038783	0.325740708680325	0.343897056606492	0.617217049923046	0.330511873186285	0.367949758141234	0.341269688574244	0.303306961543907	0.323822731812698	0.365674175646104	0.839418150327804	0.483547699072346	0.266994389612803	0.293043207110463	0.258513200153653
Fructose-6-phosphate_(1MEOX)_(6TMS)_MP_767170.94_TRUE | Fructose 6-P (1MEOX;6TMS) [MP-1.1] | Fructose 6-P (1MEOX;6TMS) [MP-1.2]	0.744387174827509	0.865302911244784	0.632293193917877	0.699589216392029	0.661709137189267	0.714729595328917	0.662748537791337	0.680235593202038	0.525023176974155	0.748899832415227	0.817317286069536	0.817783292814004	0.722296763991286	0.699462643790332	0.636166992561955	0.603632356340635	0.65133324442849	0.637906911403244	0.728542217226206
Cinnamic_acid,_2-hydroxy-,_trans-_(2TMS)_633587.31_TRUE	0.465218857991975	0.443728506161143	0.46396533342869	0.41038483995776	0.377852430156269	0.414898237021714	0.347495369272642	0.472472010832446	0.329925410725152	0.34374848593841	0.473708520354502	0.364335251053847	0.466383257637587	0.266029785017549	0.463583270063004	0.42028937671336	0.528267275539807	0.46706733997156	0.439837693018983
Sorbose_(1MEOX)_(5TMS)_BP_583432.25_TRUE | Tagatose_(1MEOX)_(5TMS)_MP_583026.38_TRUE	0.299100064401297	0.356402428236008	0.278683357254865	0.339872639576603	0.221862542871195	0.293009704307239	0.290990754776521	0.336549536957543	0.256709480465121	0.292900170612386	0.388082546699276	0.298204628893716	0.338156129290248	0.292477023257083	0.27409550484152	0.334567226033451	0.321067366166954	0.247183498289302	0.27500106120857
Ribose-5-phosphate_(1_MEOX)_(5TMS)_MP_705185.88_TRUE | Ribose-5-phosphate_(1_MEOX)_(5TMS)_BP_707635.88_TRUE	0.757482742944222	0.801259956393385	0.759797823451357	0.773837199584121	0.746543838370147	0.728861752776992	0.751058765808302	0.757848738117194	0.701874530232037	0.783918139558902	0.742116108210268	0.754079954665387	0.785392441898375	0.738159223044476	0.649176114412291	0.749578978214289	0.788649041293566	0.726794150763987	0.734230130414122
Erythritol_(4TMS)_410125.56_TRUE | Threitol_(4TMS)_410391.25_TRUE	0.458908517404514	0.514932676867946	0.481686001438224	0.49807599655175	0.452963076765053	0.48476092970985	0.49349423843771	0.551007234777803	0.420223695534781	0.468648826775573	0.47204787449591	0.446541945860551	0.523644391350775	0.496206533112116	0.518828379985271	0.507487950544358	0.51229146132456	0.499662289255531	0.502693886205301
Propanoic_acid,_2-amino-2-methyl-3-hydroxy-_(2TMS)_295176.81_TRUE	0.608817283108958	0.578621814627771	0.589955727510912	0.563492192230405	0.445028431409675	0.618243014428731	0.645021836141214	0.5084608140892	0.619758035917585	0.641715718470224	0.614974424085945	0.653087440614935	0.658078332526583	0.646155919697966	0.657299778766266	0.450097760961048	0.609792026130072	0.586970431619243	0.639358472558582
Glucose,_2-amino-2-deoxy-_(1MEOX)_(5TMS)_MP_608643.12_TRUE	0.444925275256915	0.437053072869708	0.437179410331053	0.421996043754237	0.341260676648548	0.373751520162223	0.431898300439072	0.44777319807812	0.345684039197464	0.363710903449583	0.4232277975933	0.313853649413109	0.470110789585572	0.484214144209963	0.445200863315348	0.365865693642988	0.47265941111399	0.439653627105713	0.341599695848913
Adenosine,_5-methylthio-_(3TMS)_995365.31_TRUE	0.514878074733089	0.424020963873917	0.481240617775077	0.502595023039218	0.495151866684929	0.408735729874921	0.522444976364304	0.453346375733475	0.454125527173385	0.437650944725305	0.466097699087215	0.391101477330031	0.481856218377784	0.446656848051053	0.495046980201801	0.452596405931822	0.474566276151748	0.50627253135858	0.430039266953352
Nonanoate ((1TMS)) [MP-1.1]	0.540072507565029	0.454408033786821	0.633084672705184	0.48809756669989	0.546656894091048	0.493861110947633	0.623820765200898	0.778516816393586	0.684017142729998	0.550295456147857	0.519770446616565	0.562064061217347	0.494755537747941	0.468664785556664	0.479540144594973	0.70971235778452	0.519373260144581	0.583165368507482	NA
Butanoic_acid,_2-oxo-_(1MEOX)_(1TMS)_MP_252911.77_PRED	0.525954606758147	0.439895956256475	0.567503419934453	0.502595023039218	0.524545128157212	0.485927237740624	0.601693643329309	0.620249302084722	0.499767806698515	0.488358028106633	0.466961229410624	0.464030729158971	0.466005917853792	0.500013343703936	0.59525739777091	0.643640560152465	0.611080763758908	0.526231337099424	0.530370963019031
Glycerol-2-phosphate_(4TMS)_556161.06_TRUE	0.473471065058816	0.509182715343125	0.563817963494633	0.529382951819128	0.476969584330877	0.531450339231207	0.498293831964373	0.604163641208559	0.474612295499072	0.502994118098295	0.536019504439249	0.471522470537589	0.506438450807525	0.49537894155856	0.594727309266137	0.58898395962438	0.542243746693898	0.531341770698537	0.57616422080472
Glucaric_acid-1,4-lactone_(4TMS)_660551.44_TRUE	0.690485329383601	0.684472888095313	0.597036338202615	0.673309262546607	0.581559651372066	0.727844177988891	0.574828020285299	0.670712710996556	0.575419975783371	0.682822045125519	0.755987651171986	0.698394108776523	0.754052524159544	0.753222500619125	0.724489048578113	0.526284406755715	0.736647497102781	0.667526871765295	0.617925564925101
Cytosine_(2TMS)_515287.31_TRUE	0.489378318483951	0.477640147911091	0.52049970005628	0.456376650737624	0.460198667259014	0.501419166395985	0.559210137473978	0.492817046905518	0.440393099737201	0.483632912062237	0.486031663495036	0.497213713489695	0.479780824077808	0.461998565761877	0.499901165294514	0.534231389705005	0.501696933623303	0.514086072993712	0.49827726930048
Heptadecanoate (1TMS) [MP-1.1]	0.475607152871506	0.573261610544091	0.714874194724143	0.534675455497468	0.54311028325099	0.495693382569841	0.662097193431286	0.609016063023988	0.630880341702751	0.535674401273872	0.432011594768313	0.557753566220474	0.448922739017247	0.430112762825554	0.601231289691021	0.57044731968919	0.542881725450058	0.461533893483891	0.484003814120101
Ribulose-5-phosphate_(1MEOX)_(5TMS)_BP_708146.5_TRUE	0.73290977168605	0.777054795023047	0.752138858807216	0.75981297794525	0.708110165307672	0.71118094941132	0.743084373524792	0.747453869116171	0.66474134258322	0.771894054976984	0.719605060908928	0.725620813503514	0.771068215271719	0.715946620656033	0.648035920314923	0.714033398686385	0.76892910934787	0.714627593609184	0.702643075722381
Arabinonic_acid_(5TMS)_546660.38_TRUE	0.544058069143758	0.523529648356466	0.570012862130098	0.55452971791759	0.581171295574079	0.544313864643351	0.573780096966808	0.630135776480429	0.551571181824215	0.568977817064776	0.526466991530065	0.514354285523799	0.508504734279251	0.519717164215682	0.580584989536973	0.607342333418569	0.578416452921845	0.564288550794887	0.576548185490399
Galactonic_acid_(6TMS)_626905.06_TRUE | Galacturonic_acid_(1MEOX)_(5TMS)_MP_624653.5_TRUE | Gluconic_acid_(6TMS)_627052.12_TRUE	0.240523958428412	0.274928170006646	0.330311747653591	0.20573259840579	0.189435514989503	0.296855411002323	0.263229449040105	0.213204978378103	0.12364169807084	0.241195912841801	0.293752017464417	0.245884006120498	0.24846935317802	0.232960248644161	0.330794028202908	0.237046982598704	0.297487338120287	0.262376795980238	0.277088045462781
Uridine_(4TMS)_863220.75_TRUE	0.426231120715603	0.456337494782021	0.471162867588204	0.449531874481504	0.388052014247854	0.40810618623707	0.393537067861881	0.484477161966734	0.40479389681843	0.448067240826292	0.433076806188355	0.351671197938456	0.459458053113098	0.426759178972471	0.455601036900991	0.403500732928632	0.49169705157256	0.468692824011206	0.413525806415668
Sarcosine_(2TMS)_233204.59_TRUE	0.631909223410716	0.680781028488477	0.696138912732318	0.686016001875789	0.656864170994666	0.647789729675617	0.711116299721088	0.604572837703573	0.690443420878498	0.662514299791192	0.670779310872586	0.663535285867206	0.655283609344146	0.687258107021153	0.741265697838618	0.589603694459062	0.640685619357322	0.659214195124895	0.6545691001516
1-Pyrroline-2-carboxylate	0.4874056177997	0.448148694444182	0.566659374834763	0.453105197416382	0.452574313458061	0.310212862534684	0.654777103183909	0.588359510401712	0.434133963525458	0.555589582108611	0.490560953290368	0.326709335506883	0.439903460179998	0.476627150714346	0.485400672627088	0.599557182481157	0.581494850937243	0.477621155271284	0.542393965516169
Galacturonic_acid_(1MEOX)_(5TMS)_BP_632938.19_TRUE | Glucuronic_acid_(1MEOX)_(5TMS)_BP_633533.94_PRED	0.597861472908704	0.638610774393141	0.5887072769337	0.569715259164587	0.526644251443155	0.6195897659252	0.551471757171311	0.632263774929759	0.494518697623551	0.547284279925076	0.649647457213679	0.553328620031919	0.640433657813329	0.614515772975039	0.627305907199868	0.534231389705005	0.718073363636482	0.61829787757751	0.60254569537214
Glyceric_acid-3-phosphate_(4TMS)_606948.88_PRED	0.528714852142802	0.522451584925013	0.460508940824011	0.573945187299041	0.530517123815704	0.584689352016603	0.480632161822076	0.420416768228472	0.329925410725152	0.458907972655072	0.521931357362487	0.599961576085503	0.568961507371756	0.410269671512586	0.609433280524773	0.573828255916347	NA	0.479402493695894	0.444339221236073
Calystegine_B2_(1MEOX)_(4TMS)_BP_612263_PRED | Calystegine_B3_(1MEOX)_(4TMS)_MP_614672.38_PRED	0.41532427859469	0.437411057299221	0.424319623806333	0.417153725007652	0.34477587980677	0.511630907570115	0.437097643344034	0.398455024822097	0.359208213986941	0.516871476717068	0.515360131676898	0.509564784009933	0.425637040869175	0.49675590635046	0.471188702814482	0.408223335158673	0.468780916376141	0.422855188062	0.376803228471798
Adipic_acid,_2-amino-_(3TMS)_553368.06_TRUE | Adipat, 2-Amino-	0.563043755951106	0.648030871568422	0.548301112948117	0.574303107792818	0.544062705132006	0.625674786290113	0.562217218140743	0.619495821077651	0.526046981084031	0.571643806813682	0.632309455149138	0.573538990934853	0.576371733522003	0.605423819564505	0.622238674285838	0.600730155536606	0.634264172156472	0.583714195433713	0.571293194951388
Butanoic_acid,_2,4-dihydroxy-_(3TMS)_409079.97_PRED	0.50971950553229	0.55801881500141	0.502300575304242	0.599278566613418	0.581753524385882	0.499295998425471	0.516337973407873	0.581090164566603	0.461208684134257	0.542980545964716	0.532323382262454	0.531819550926914	0.511988896368794	0.439382464358811	0.480081814886973	0.544610888851232	0.540960629780099	0.542525671955571	0.546302947358852
Salicylaldehyde-beta-D-glucopyranoside_(1MEOX)_(4TMS)_MP_879215_TRUE | Trehalose,_alpha,alpha'-,_D-_(8TMS)_874876.56_PRED	0.593332506655353	0.476508721754018	0.45596869802786	0.425611902507007	0.377852430156269	0.429888732103036	0.382071105121763	0.383130876997813	0.247783952610648	0.381645810072202	0.475352306573171	0.416297435570118	0.408458252871458	0.512421374558542	0.320939191043427	0.375282114629659	0.563554481148905	0.350413504509576	0.336478757530022
Quinic_acid,_5-caffeoyl-,_trans-_(6TMS)_1052532.75_TRUE	0.457736196660787	0.448148694444182	0.500298483291178	0.483387770445514	0.593211798157565	0.646520344328917	0.513450009299123	0.635757665817009	0.570343003843325	0.593283450945827	0.519147709111015	0.644662997517542	0.490564788720246	0.446656848051053	0.661564109449447	0.530088802015243	0.528959276831321	0.498082168224807	0.520918057522291
Saccharopine_(5TMS)_855563.75_TRUE	0.427635071651837	0.22407272697788	0.427321185839679	0.358895486132517	0.359496271705587	0.32253814424861	0.312278906206995	0.522267205374129	0.340208267046553	0.400035746380677	0.299909092096982	0.442231450863678	0.206418919569767	0.263713684589888	0.34390261445255	0.472082379644883	0.438274347003713	0.344915879483035	0.436067717506111
Tetracosanoate (1TMS) [MP-1.1] | Tetracosanoate|Tetracosenoate, cis-15- (1TMS) [MP-1.1] | Tetracosenoate, cis-15- (1TMS) [MP-1.1]	0.493257899035098	0.480989714392085	0.624808151257268	0.478140465854459	0.471780291288245	0.483586035285007	0.615899277459696	0.604572837703573	0.533059722862729	0.527374671428155	0.459920487454208	0.471827435275815	0.453053285964195	0.470289079890327	0.532672721801167	0.585855664044781	0.562421697578853	0.513258486528894	0.492520247071714
Butanoic_acid,_4-amino-3-hydroxy-_(4TMS)_531278.19_TRUE	0.393784703950313	0.447812750779018	0.409198392213791	0.431568161228417	0.364571812427917	0.474695229359018	0.401693717157039	0.406848217480687	0.340208267046553	0.473325072253049	0.465664200697477	0.467818691826177	0.440783592049628	0.459943650161586	0.424448256259993	0.412835241142502	0.430485893088963	0.462934245898936	0.391002133697086
Octacosanoate (1TMS) [MP-1.1]	0.737332455116069	0.565224974056341	0.601767378334594	0.531367197693527	0.51085754173791	0.580675648736056	0.459167683190432	0.456072087382832	0.555096742980044	0.446462826456994	NA	0.492974039837663	0.426594905586694	0.589438627865715	0.43622677656009	0.50654648632074	0.690909745734303	0.485616126723292	0.456443233296874
Tryptophan_(1TMS)_766366_PRED	0.433140320035202	0.571813833547248	0.464941215104702	0.504723977505503	0.451011049769121	0.504206819898985	0.481786728047078	0.555838828441573	0.465502211290259	0.47652635610213	0.537975319183565	0.547239790083482	0.482199639954008	0.468664785556664	0.62599930468918	0.454449785229765	0.482442080494325	0.497400447767698	0.53696439042855
Glutarate, 2-Oxo (1MEOX;2TMS) [MP-1.1] | Glutaric_acid,_2-oxo-_(1MEOX)_(2TMS)_MP_524574.81_TRUE	0.303434453582719	0.297631456206468	0.325232605748119	0.357688766937569	0.474565992622064	0.248391006305796	0.327442604282007	0.344889421896328	0.244089995582554	0.289015359960707	0.303493996147409	0.24939283430911	0.361510168444669	0.285499067409259	0.332153924544448	0.375282114629659	0.417106438345577	0.347686932550371	0.240334343452593
Glucoheptose_(1MEOX)_(6TMS)_BP_679981.19_PRED	0.374021457667661	0.427089484847008	0.357318478159075	0.426983246450473	0.388052014247854	0.427672181120675	0.370898515949093	0.402098178488313	0.32212782543236	0.445924768904854	0.461709583578836	0.378788444738278	0.387524089159921	0.412135967231841	0.446538188501989	0.477625440487687	0.398951239671149	0.420006286298242	0.360073304679034
Threose|Erythrose (brk) [BD-1.1]	0.4984549707181	0.439895956256475	0.59168962814772	0.550487324302743	0.604002422981562	0.514571219907465	0.66892957212109	0.623233325522114	0.55924088269692	0.529738149596619	0.49532879535467	0.499809765713038	0.560349634512852	0.458210950948815	0.537288218973013	0.692515114786693	0.621258201973482	0.518164583113611	0.546075376300667
Arginine_[-NH3]_(3TMS)_606298.12_TRUE | Citrulline [MP-1.1]	0.508405620257426	0.437053072869708	0.461006652666709	0.428344081907991	0.446240511946353	0.529103398327693	0.442155075987189	0.506402842611135	0.438111584617895	0.508752013862381	0.474121034085533	0.530110169963243	0.380133676953683	0.415350805668467	0.440430843512233	0.518891236529217	0.470245642944063	0.43901263847377	0.46670842173298
Cystathionine_(4TMS)_754589.12_TRUE	0.388613364138258	0.413645454610051	0.295121859166278	0.352778182416771	0.445433340090651	0.390800428047723	0.38008919019049	0.451506983367078	0.341868026670892	0.395793500279819	0.415722531810452	0.34199750520414	0.426116655468685	0.38435787227849	0.319480839369579	0.4605045905674	0.231848373717771	0.424960939648132	0.37856833373686
Levulinic_acid,_5-amino-_(1MEOX)_(3TMS)_BP_591715.44_TRUE	0.965274127808476	0.912898846467842	0.862311051637242	0.936907984994762	0.851784289933449	0.994027324971167	0.817891907690512	0.900634038986286	0.815530814835169	0.951176000333363	0.999892021575551	0.935130205775685	1	0.997652190120414	0.928389262645516	0.763483444855782	0.975916594377368	0.878775126449826	0.864713707893409
Spermine_[+CO2]_(6TMS)_960617.88_TRUE	0.288545986276619	0.304830311982979	0.287714541108041	0.255869310196923	0.28630528629414	0.325740708680325	0.228317445838167	0.309044303516282	0.184045046741935	0.285043242925735	0.287351518015505	0.237397501774387	0.227979089389318	0.231542035041839	0.259897304137322	0.286084089167747	0.350803581092812	0.220335665071921	0.27500106120857
Thymidine_(2TMS)_849645.31_PRED	0.451143399559405	0.444072651915279	0.468794437064251	0.333050232442631	0.341969073870501	0.460809161559157	0.447770877860949	0.43509817298292	0.359709200025314	0.396507649814522	0.492778954438913	0.453487250084289	0.406316761451495	0.439773633937916	0.432637613491868	0.355975891185265	0.465813417290463	0.454939274446928	0.403131692956114
Ergosterol_(1TMS)_1051145.12_PRED	0.437157936166725	0.437053072869708	0.441644126170322	0.443162513015675	0.553326917887738	0.606312120918103	0.508534408615706	0.572075247575704	0.534431028837955	0.527714252261493	0.483718601987473	0.615846274018109	0.468629680417693	0.427604147855483	0.615146614880243	0.517557227030701	0.572625176523232	0.479402493695894	0.505578366272041
Alanine,_beta-_(2TMS)_273369.53_TRUE	0.348449333538996	0.451142535074175	0.290216497792377	0.397961023055768	0.267211612588518	0.269271581153351	0.322071002680329	0.369329324245426	0.250506963027951	0.279604297809494	0.430939328916609	0.495636447620488	0.508797855195884	0.492307507124932	0.627305907199868	0.492869920440219	0.440022573541996	0.608048955150753	0.384894150747769
Phosphoenolpyruvic_acid_(3TMS)_528164.19_TRUE	0.314491437129561	0.27399106190441	0.33719775933275	0.293769997587488	0.276501641753991	0.289069032357794	0.289372340300195	0.294684120713883	0.221292580930985	0.307638017526481	0.229974363286279	0.23614908258166	0.305228681136209	0.28241335880952	0.415012580259113	0.34556258060372	0.389876909966896	0.350413504509576	0.322588843178061
Fructose-1,6-diphosphate_(1MEOX)_(7TMS)_BP_915966.25_PRED | Fructose-1,6-diphosphate_(1MEOX)_(7TMS)_MP_913507.62_PRED	0.762354857116265	0.83109061300051	0.746530245122265	0.722890294239602	0.681842336606047	0.64918841615051	0.69599142164824	0.647822883985242	0.628544058945853	0.682822045125519	0.70846661957666	0.65764551457241	0.749777274139342	0.715030636291656	0.734495664919666	0.622830853007532	0.593994907517413	0.685974690255664	0.724757280360153
Xylulose-5-phosphate_(1MEOX)_(5TMS)_MP_733445.94_PRED	0.515301134412913	0.57116637790578	0.479898045528677	0.52518959540648	0.477650635273701	0.48670006784775	0.460463543573745	0.530937498121099	0.448629938483564	0.516148564587105	0.551297925581938	0.50185787975743	0.540953353662174	0.537908294847986	0.547213733128166	0.517557227030701	0.521550237595371	0.491610460301437	0.472662894806395
Tetradecanoic_acid_(1TMS)_616607.75_PRED	0.499383447439329	0.576120510935728	0.610883766078278	0.545651875414237	0.554003409136661	0.528807588965438	0.567001981746255	0.561065253263974	0.552812759794846	0.579155268686951	0.534039775210583	0.564178210280249	0.522568516938625	0.490321995751198	0.635343763389023	0.521094682258095	0.559267428391309	0.488039303136324	0.528117545928482
Pinitol,_D-_(5TMS)_617547.62_PRED	0.333501829673497	0.325447679634817	0.316806629932578	0.253707967191637	0.272430144941099	0.416102688816161	0.36342112714535	0.359026220989442	0.263553212879196	0.395793500279819	0.406606904205859	0.407569620419738	0.304242726385523	0.373527743095971	0.36729822496982	0.379826557902268	0.332288099519114	0.265971888607466	0.325770840881692
Calystegine_A3_(1MEOX)_(3TMS)_BP_588253.69_PRED	0.966512522438832	0.914908459654035	0.844199233506622	0.942661193904415	0.860248089953306	0.994859603807924	0.805776006435636	0.894110575160022	0.809864730866412	0.944370957019341	1.00032393527335	0.935884680504341	1.00374135924441	1.00056782015703	0.926706428219795	0.762843139548301	0.97214749751482	0.879736973787139	0.865956188471639
Glutamic_acid_(2TMS)_477506.88_PRED | Propane,_1,3-diamino-_(4TMS)_478361.56_TRUE	0.46352041551949	0.4293548880817	0.45596869802786	0.510791513051187	0.467162231577463	0.490509057849874	0.426548852854954	0.444923272111316	0.400024078521349	0.477880782418477	0.494966981680426	0.474547293727905	0.423218224992974	0.456106787619033	0.471759134419475	0.45810497976247	0.471215227939876	0.457262206866009	0.456820261314523
Benzylalcohol_(1TMS)_279072.84_PRED	0.438476798327268	0.388392346560268	0.513881502785828	0.441407922726493	0.372534007993885	0.353776846168613	0.517765250910421	0.520355984922204	0.402424308706933	0.458907972655072	0.476167983622449	0.428982226965002	0.438574561535508	0.440941471243765	0.474020880461486	0.523273726093065	0.513050825783719	0.431461982697272	0.529372976614495
Leucine,_cyclo-_(2TMS)_377176.62_TRUE	0.439132501447348	0.400380569571859	0.43433366078994	0.463413012529078	0.383022411690123	0.35466099859765	0.442866429181847	0.500089915592432	0.375065981869596	0.412183777447183	0.450665879968251	0.38090483105605	0.375019828535215	0.347333000912267	0.411740452403498	0.4605045905674	0.424879061248114	0.460688106910388	0.462381582458257
Benzoic_acid,_3,4-dihydroxy-_(3TMS)_613892.19_TRUE	0.35172383081427	0.280444340782695	0.416281533659354	0.362859672121744	0.427615686809285	0.343713454671236	0.378085848736716	0.400891637233102	0.362687048084406	0.382419342026206	0.343130761384587	0.413726744250512	0.364990723483325	0.307374695989521	0.333502440866907	0.392019480415014	0.357496978829515	0.336907443500411	0.320164318663557
Norvaline,_DL-_(3TMS)_445436.62_PRED	0.512317896643502	0.553758839673224	0.541971371464233	0.628786014723828	0.615818228889933	0.524303364158346	0.588585645474813	0.632616106523616	0.476488566351446	0.584401996186989	0.560011641226825	0.521742228946245	0.548982356178364	0.49648145410565	0.550390880600505	0.630014751452435	0.595407393579599	0.610640516716547	0.550350079905499
Tyramine,_3-methoxy-_(3TMS)_699102.56_TRUE	0.311792329224927	0.182821108280361	0.311340168524807	0.158092091111141	0.349587725612269	0.319269993754774	0.382071105121763	0.399677286595026	0.20008823484364	0.338878983216921	0.301112901001848	0.343977685127279	0.252553071479037	0.276058604524487	0.474581391496646	0.372504200528075	0.409658417601732	0.252078989449241	0.255023416482234
Galactose,_2-amino-2-deoxy-,_D-_(1MEOX)_(5TMS)_662843.5_PRED	0.307663543473107	0.326139490741564	0.364128111242591	0.319568236770171	0.206357663899787	0.333979394964169	0.316539031289631	0.380450595434298	0.287180217642106	0.342785258653298	0.275151573700866	0.267990956457555	0.296139721550565	0.361916039123132	0.239586250319136	0.342328003973178	0.371881611379989	0.299734470815761	0.218641197692053
Tetradecanoic_acid,_12-methyl-,_methyl_ester_607457.12_PRED | Tetradecanoic_acid,_13-methyl-,_methyl_ester_604072.19_PRED	0.438476798327268	0.286660436906365	0.394879645531114	0.3055202709431	0.35755650897844	0.44758119409495	0.377075997302082	0.398455024822097	0.407907013222333	0.419842091679162	0.367161674738471	0.448656094923453	0.323822731812698	0.319367084891674	0.382854999143518	0.411309918408348	0.381930301153799	0.347686932550371	0.333484735140014
Nonacosane,_n-_992849.81_PRED	0.259887114968583	0.348120822810446	0.361603562839623	0.281806676863083	0.271398133092031	0.373751520162223	0.282753519578963	0.381795522473833	NA	0.315699756092809	0.383100259691626	0.327435537888707	0.299224299893383	0.316030878368047	0.555211869715705	0.372504200528075	0.392955307982293	0.383265859185881	0.357454930712908
Glucose-6-phosphate_(1MEOX)_(6TMS)_BP_781714.75_PRED	0.527537244681312	0.665429723442672	0.408540920723136	0.517152560659276	0.495460867003102	0.511300836914203	0.520119885890536	0.505018212573125	0.316530962783433	0.506088319993524	0.629177606017881	0.604283490094264	0.52229846900409	0.523941009549221	0.491055525123763	0.35290935149797	0.461775205381693	0.460121900433136	0.56321017413042
Allantoin_(4TMS)_643191.62_PRED	0.265299643328311	0.116636963226529	0.39699376620311	0.236201179392431	0.361415932902924	0.250097857926268	0.211782267187139	0.432047430666476	0.232545433115532	0.34374848593841	0.187680556433939	0.458182298105721	0.206418919569767	0.161211333303618	0.299213510082971	0.403500732928632	0.351775912803005	0.309645886159531	0.372615036263718
Ornithine_(3TMS)_587245.62_PRED	0.90326742771495	0.848793445492613	0.782384328575189	0.871365342163593	0.787768726649129	0.93880469324964	0.745179841910992	0.848339787850942	0.748478313550933	0.877003711015058	0.934394637748093	0.869826004463583	0.927107311221148	0.931798944577245	0.864765014705394	0.682354784232945	0.912106896650021	0.818884134469571	0.803721830963293
Butyric_acid,_2,4-diamino-,_DL-_(5TMS)_500761.19_PRED	0.478762930630668	0.525240384352947	0.45800024919453	0.461173535711677	0.471780291288245	0.450509516717014	0.4538916747194	0.471643680486534	0.456813485539684	0.489625071305791	0.499256280248388	0.465302973374674	0.467884203350784	0.467353444678122	0.433361869812762	0.470388547256547	0.445162873911827	0.390253447430613	0.467773840043909
Methionine sulfoxide [MP-1.1]	0.401264616992816	0.35171984326242	0.358183412306679	0.322052027722808	0.34890792430701	0.395647324383093	0.376060612407315	0.421504403266269	0.279633844432901	0.404859680820373	0.400231610098444	0.345284854047283	0.343720389602981	0.373527743095971	0.429707591679753	0.337930823279496	0.379472749548351	0.356784068101091	0.29855715530629
Hippuric_acid_(2TMS)_643255.94_TRUE	0.359132990361561	0.321945534244966	0.320011172605345	0.262199855427277	0.346163494143639	0.33195925273355	0.259447536557441	0.362028149329133	0.314627200304524	0.361117921454455	0.346789935241795	0.308257717128203	0.382633422689312	0.33805078152406	0.372652430438726	0.350838115032299	0.277772034591743	0.365913166805265	0.329669714652032
Methionine_(1TMS)_416320.09_PRED	0.528714852142802	0.683473982161867	0.512000629365242	0.582114282600637	0.551053936637092	0.450509516717014	0.662965144805653	0.605388562982461	0.648687406951647	0.396507649814522	0.608278541795253	0.688314666304701	0.735575095322953	0.729677090168422	0.793813360040022	0.562443369374872	0.571820095667099	0.837270765376015	0.601382467495605
Eicosatetraenoic_acid,_5,8,11,14-(Z,Z,Z,Z)-_(1TMS)_835936.56_TRUE	0.32488789734164	0.576749313071805	0.452879240984365	0.308206981161633	0.267211612588518	0.35466099859765	0.367730793006158	0.515162116397757	0.431434058257191	0.442661566631444	0.318171985595439	0.390109431645354	0.438574561535508	0.416257659912632	0.365105718221419	0.444357026954821	0.562137329514173	0.28920869245361	0.656656806812326
Guanidine (3TMS)	0.429719994446503	0.336190818498127	0.468794437064251	0.420868496104699	0.33328409362983	0.314805671737086	0.47354949284952	0.405671934514162	0.328154822915876	0.282344690212591	0.361479984691458	0.41840979823193	0.378234167442636	0.34802532973262	0.429707591679753	0.465799052959762	0.484243840747582	0.304762459475317	0.448729339038552
Asparagine_(4TMS)_BP1_479623.44_TRUE	0.259887114968583	0.187586143940354	0.240691294439809	0.206679737494675	0.18287746207985	0.258368574136009	0.253625886696547	0.25703498344799	0.145504021502757	0.130302594557702	0.172490216184266	0.202982901515854	0.181681012744389	0.201909278043321	0.27409550484152	0.316828587073945	0.313964997277656	0.224926803634126	0.232506973025024
Tetradecane-1,14-dioic_acid_(2TMS)_801298.94_PRED	0.414572273224175	0.426327557523507	0.405218319832266	0.322052027722808	0.281468310508571	0.428784304821575	0.409506422318639	0.36053318908001	0.298650443331453	0.314570347972842	0.374947383844247	0.473946705031345	0.395754639375123	0.359360966387133	0.422913513610483	0.386017448484522	0.354660284695114	0.368364317360073	0.379152820642993
Tyramine	0.272264130928668	0.229048014473282	0.232405798199569	0.255151781308814	0.21071658613542	0.241374970775269	0.351025138464865	0.172978144764671	0.21917124110383	0.19205535736506	0.20377010787994	0.343977685127279	0.14262489143569	0.161211333303618	0.257762878759216	0.36295059369791	0.268576115904216	0.188432890963662	0.232506973025024
Lyxonic_acid_(5TMS)_539863.25_TRUE	0.221040283383896	0.33290629627089	0.323161551392577	0.288485993162937	0.239886742666457	0.335974284755122	0.30041518972126	0.341597819598537	0.225463884891173	0.304067153261755	0.358141483902478	0.22713806739213	0.359386711118281	0.310893223022614	0.310442203540699	0.395368763788623	0.368396901040396	0.298270136006574	0.178334828859128
Acetonitrile, 3-Indolyl- (1TMS) [MP-1.1]	0.283819298485774	0.265314925298364	0.34196510294815	0.32547198790482	0.283418282701278	0.280883181401446	0.322071002680329	0.329599982520684	0.378262386815689	0.194307002711454	0.222353589561673	0.35104346392728	0.294051436272238	0.222759882530136	0.34008077302636	0.355975891185265	0.293449126211517	0.205767159557597	0.328120433052887
Butanoate, 2-Oxo- (1MEOX;1TMS) [MP-1.1]	0.429719994446503	0.379061086675122	0.39629172027206	0.423395484867006	0.367674827156112	0.406839599388359	0.38008919019049	0.404488230154918	0.383176674722187	0.431911746718521	0.453029594237637	0.42620113196686	0.441221935982739	0.384908184618215	0.377834444794139	0.528407034107573	0.459719898327895	0.353097000856024	0.37442209720984
Gluconate 6-P (7TMS) [MP-1.1] | Gluconic_acid-6-phosphate_(7TMS)_802294.06_TRUE	0.513602691940427	0.432328988082645	0.461006652666709	0.376802698358903	0.346853422865886	0.45667568748349	0.381082797287647	0.437104785892331	0.342966344754401	0.34754974576396	0.420955317456405	0.527075905971784	0.418774667518318	0.430112762825554	0.517975749635634	0.394536772496815	0.383549332857564	0.375512431765516	0.456820261314523
Alanine (3TMS) [MP-2.1]	0.572422449419248	0.538926648866578	0.6040886159845	0.550487324302743	0.620435677905139	0.619086065017064	0.648798930567153	0.514502655196508	0.555096742980044	0.658189391881654	0.545305341851399	0.423779832484998	0.539983049074497	0.48302400050655	0.450484837028887	0.493375095678815	0.555167190307139	0.324139010617136	0.556037597901406
Xylulose-5-phosphate_(1MEOX)_(5TMS)_BP_716367.62_PRED | Ribulose-5-phosphate_(1MEOX)_(5TMS)_MP_715032.12_TRUE	0.659084662123171	0.658315656457986	0.609768305093086	0.599278566613418	0.527165336590669	0.529103398327693	0.518238577552564	0.573044844145014	0.510063340933144	0.647494151243499	0.645412388782493	0.6218982496716	0.581199888569838	0.591886830231513	0.376811287324323	0.488781136488003	0.657156937558102	0.598151294354615	0.556896638880552
Spermidine (5TMS) [MP-1.1]	0.272264130928668	0.22533033559497	0.210875007594311	0.208558994800711	0.291947721915893	0.193660760325191	0.295762879773404	0.311008892342509	0.20008823484364	0.249574342439201	0.254133574231542	0.323772463337453	0.282077749848224	0.274974652936169	0.336166084323745	0.202651811377329	0.348842233027273	0.221495135689241	0.372615036263718
Cinnamic_acid,_4-hydroxy-,_cis-_(2TMS)_604876.38_PRED	0.297630950429056	0.193737642935185	0.351148880321383	0.265621698445375	0.18287746207985	0.224361218546976	0.340227485612355	0.180963031454511	0.207049621252658	0.219301762776337	0.242504158084537	0.229762738690487	0.261712797137331	0.232960248644161	0.329422558136355	0.266314940221025	0.354660284695114	0.267741298210099	0.241605973382085
Sedoheptulose,_2,7-anhydro-,_beta-_(4TMS)_647067.94_TRUE	0.434489853712479	0.41282034282849	0.384683738145774	0.454748457135242	0.392410936483487	0.450509516717014	0.384032047014742	0.456072087382832	0.401228073323584	0.406887448024886	0.497125834355105	0.40979479610313	0.456685944072998	0.504256520601713	0.486443697369637	0.444357026954821	0.46279370147354	0.433795743649547	0.381471698310514
Lactulose_(1MEOX)_(8TMS)_MP_858297.25_TRUE	0.405285326252267	0.0881634521285991	0.377043612301978	0.266298225580557	0.247105018749289	0.320366830410761	0.378085848736716	0.249050096758149	0.303454062621754	0.232400477979997	0.295002305930919	0.295593664012812	0.224836852049846	0.32975560555966	0.270164901195419	0.403500732928632	0.354660284695114	0.311015746695862	0.18013577443455
Cyclopropanecarboxylic_acid,_1-amino-_(3TMS)_396111.84_TRUE	0.319767264286682	0.298446626843511	0.287714541108041	0.276148522427966	0.259649515769429	0.312525788602401	0.369848613539157	0.331361652915596	0.304803997404881	0.268197000004975	0.28471875184731	0.214786996871891	0.297174215911231	0.325838959715572	0.353672075843071	0.334567226033451	0.401872435099022	0.240083763366661	0.284204995975983
Glutamine (4TMS) [MP-2.1]	0.176961669923176	0.147078686495079	0.197061802242262	0.248560123907139	0.0689169998538893	0.234036247698443	0.211782267187139	0.259622838526266	0.234520081680669	0.223144343880715	0.237252512252749	0.0978342874699618	0.164424356389025	0.103483411042895	0.257762878759216	0.211302243816867	0.244983882310958	0.231588904014449	0.235154658229737
Spermine (6TMS) [MP-1.1]	0.244572721667872	0.177917936573649	0.287714541108041	0.141166131820591	0.135605939526636	0.253457752662495	0.2496406303115	0.314877411223319	0.182751555691807	0.311138166939541	0.252522500721711	0.136169557922182	0.221634758984943	0.216627094963044	0.264083169614306	0.40109623481114	0.283639822845287	0.267741298210099	0.222915901296885
Spermidine_(5TMS)_724912.5_TRUE	0.246562331581661	0.248698130998691	0.352042853135023	0.244025711830905	0.209274978488019	NA	0.292595156830469	0.390949363216797	0.273367756939263	0.266717897069061	0.263477217491998	0.348508613802176	0.175415512260848	0.149790501797325	0.305725376264933	0.421019491270368	0.26378651887322	0.213207551269272	0.304877117905043
[truncated: 6 more rows]

## Sheet: KD
Table includes multiple worksheets – one for each tissue
[truncated: 348 more rows]

[truncated: 4 more sheets: LN, LV, MS, SP]
