# Supplementary material for: Reduced purine biosynthesis in humans after their divergence from Neandertals
Source: eLife. 2021 May 4;10:e58741. doi: 10.7554/eLife.58741 (PMC8133780; doi:10.7554/eLife.58741)
Supplement: Supplementary file 8. — The table includes multiple worksheets – one for each tissue. [file elife-58741-supp8.xlsx]

## Sheet: CR
Supplementary Table 8. Normalized intensities of metabolites detected using GC-MS in 12-weeks-old mice
Table includes multiple worksheets – one for each tissue
hum - humanized mice
wt - wild type
number - animal ID
Metabolites	hum_101_2._cor	hum_102_2._cor	hum_103_2._cor	hum_104_2._cor	hum_105_2._cor	hum_106_2._cor	hum_120_2._cor	hum_121_2._cor	hum_141_2._cor	hum_153_2._cor	hum_98_2._cor	Wt_132_2._cor	Wt_133_2._cor	Wt_134_2._cor	Wt_135_2._cor	Wt_142_2._cor	Wt_147_2._cor	Wt_148_2._cor	Wt_152_2._cor	Wt_91_2._cor	Wt_wt2_2._cor
1-Pyrroline-2-carboxylate	0.679120719945249	0.660437463613454	0.639705453322049	0.670648481338582	0.665401530083396	0.667467894883466	0.672062553822588	0.656988522823872	0.579606670169803	0.569394287777954	0.728715430409454	0.597903961992978	0.613007540270262	0.636083186032969	0.553921148279478	0.599260055822812	0.564828912115908	0.608856693352551	0.657335741883972	0.809125008167752	0.49364763021548
2-Piperidinecarboxylic_acid_(1MEOX)_(2TMS)_549118.94_TRUE	0.850843911944528	0.874946260162238	0.86268290637924	0.840788566093818	0.859529072701748	0.866513973612142	0.885986339517341	0.849430004842569	0.89730040938651	0.830544812648527	0.84742870522079	0.890510807923614	0.892422275619519	0.879123295150038	0.867553673656651	0.884426297827029	0.851638694786695	0.856302296262847	0.855438283854677	0.849012427001743	0.864714692428075
2-Piperidinecarboxylic_acid_(1TMS)_357365.44_TRUE	0.860120298610596	0.866742462790901	0.866446908859849	0.860075863112375	0.870679661964441	0.868448280668502	0.882989956660666	0.865954451882077	0.877822454302714	0.858790606799513	0.872314660737694	0.873723923596772	0.877998098389014	0.868353565678482	0.88645376285099	0.867176737304447	0.859621323077239	0.86336200639688	0.862130627496086	0.861580602224189	0.874497179273388
2-Piperidinecarboxylic_acid_(2TMS)_375026.84_TRUE	0.792561385146308	0.858331873320327	0.809627441048471	0.828942487920695	0.838406255403946	0.834981978468213	0.842733203410866	0.860067899275563	0.834660387261559	0.840268813995757	0.812435810042215	0.828901471814904	0.818080924526483	0.85415107203733	0.837180135455997	0.802255169218723	0.851287468086532	0.871281752129179	0.864789793910748	0.840226188917161	0.805481144149725
Aconitic_acid,_trans-_(3TMS)_600462.25_PRED	0.941135815726046	0.937953654330192	0.938585901083536	0.939617016748692	0.921619234171722	0.912200168523463	0.914804802498927	0.885017221468875	0.923849513212497	0.897979374147815	0.912724133443382	0.904517177021818	0.913107738969872	0.899740627768739	0.911449695299871	0.91484291830208	0.91227208667129	0.905289203901148	0.896788612905921	0.928873829370254	0.904401052821602
Adenine (2TMS) [MP-1.1]	0.676478775552655	0.718477772107951	0.70644132013128	0.767837977266236	0.729283789526482	0.702559055536581	0.834816574312566	0.693905502176166	0.692254438634704	0.750949204401711	0.742422605818433	0.67585276910815	0.677712162317803	0.703106284483419	0.720566693574721	0.695637187049132	0.716995656683718	0.729965435922799	0.729896162940121	0.677676814563367	0.748358361683458
Adenine_(1TMS)_586048_PRED	0.778468189727343	0.797894922778507	0.856505077629685	0.829338854560665	0.874930434480666	0.808717235432294	0.780609725106313	0.848679501572321	0.817753213943892	0.789742031627048	0.813356674606831	0.827876764993489	0.873173231763888	0.848428787638223	0.751627516875202	0.854991831837055	0.786212205418507	0.867982540967462	0.778134187417038	0.753228470120747	0.839433958776499
Adenosine 5-P (|ADP|ATP) (5TMS) [MP-1.1]	1.04208569531833	1.04239863893227	1.03164821600715	1.01897989081377	1.0560976568721	1.05226939443778	1.05533016846473	1.0443908225071	1.04418445699058	1.00425235223303	1.01363988748924	1.05376193480362	1.06632831301566	1.08709819067927	1.05346123975825	1.01740893078795	1.00028787217999	1.00817981168914	1.01760394063179	1.03273521151424	1.0104336632345
Adipat, 2-Amino-	0.621729818186089	0.665793160114457	0.65151773621947	0.673687534775821	0.656302162701536	0.634617087483487	0.70942731583125	0.70236887423042	0.690571548705166	0.688254410481818	0.643045489041057	0.708304622756633	0.708394956548461	0.691939665193503	0.686497439395741	0.691990041993857	0.679608567158622	0.65799050428211	0.693514781623708	0.608681887615792	0.6499310055901
Adipo-2,6-lactam_(2TMS)_492238.44_PRED	0.661733947171931	0.687531090504976	0.683890234402023	0.706399788194967	0.67776041260812	0.68811561240822	0.662644633712533	0.650884185572636	0.674160671345397	0.687806058672215	0.692106268418092	0.677041542066759	0.691131400412939	0.677727503956812	0.679581722405088	0.680959058235666	0.684248305152851	0.69045325704646	0.659411193941744	0.653277397690888	0.702214951719569
Agmatine [MP-1.2]	0.636420425360543	0.684318143954469	0.658186459137975	0.698244801973093	0.706463677724412	0.674123063760463	0.702112834491541	0.728297116719085	0.684933819652011	0.658893390314126	0.661696571548543	0.670529791591409	0.700934858848037	0.721515691921464	0.694653410686328	0.681265246351723	0.645926414866817	0.671577374497014	0.660432688706467	0.671258153907299	0.699337215229635
Alanine (2TMS) [MP-1.1]	1.08186046534041	1.10202735483448	1.09498232350825	1.08469252555288	1.11067912228426	1.09821097873939	1.12642426129619	1.08629480244588	1.10080795008046	1.09744488501894	1.07534015186908	1.09746351885383	1.09829328400189	1.09518268415529	1.09959964257544	1.08990910125446	1.09559037799258	1.10619601823543	1.10771282651918	1.10282577267662	1.11610731597248
Alanine, beta- (2TMS) [MP-2.1]	0.981741295235037	0.97999211604295	0.988383787055676	0.985712059777422	0.988684887065628	0.980181822081058	0.958564067642115	1.01019367723893	0.971002977552217	0.983714514563607	0.972659015860483	0.988236950946348	0.986419713393229	0.982935020474843	0.982481100519082	0.953189049273771	0.97477648021891	0.973519300021651	1.00079387118383	0.994640939875066	0.971106762836874
Alanine,_beta-_(2TMS)_273369.53_TRUE	1.18124898669603	1.17582683079197	1.1868820821826	1.18043004958236	1.18279177790212	1.17023681189085	1.15064847471622	1.19620697380426	1.16591473307103	1.16792727081269	1.16408259591383	1.17651681743447	1.17501886210426	1.17253272414667	1.17692867513641	1.14001802297607	1.16652380835825	1.16486426316494	1.17977595212989	1.18620784082378	1.16140079951955
Alanine_(2TMS)_207563.2_TRUE	0.816337842572156	0.83650204472904	0.842056025066907	0.85603661960575	0.855957091923535	0.842025016177871	0.868440126427316	0.854772687915459	0.848209080079175	0.872618899452873	0.844651353426919	0.837051753578687	0.846861111535518	0.849179006516628	0.842633754707439	0.85638998100909	0.853984611281233	0.87679169021606	0.888039350926143	0.832048621137591	0.875861116581788
Alanine_(3TMS)_355868.03_PRED	1.02778192864442	1.03188271624134	1.02852348809177	1.02100207133784	1.03522480084495	1.03182028307663	1.05253189390819	1.02242376275383	1.03947455079494	1.01747640181451	1.03319503831521	1.03940685245324	1.04444321302936	1.03152501377854	1.04403488335217	1.02938449016256	1.02601411201478	1.02388309830594	1.02179119613925	1.02284864428897	1.03654272460712
Allose_(1MEOX)_(5TMS)_BP_588062.44_PRED	0.65601935133346	0.707446352440287	0.736338260660495	0.740578870224744	0.999176619637477	0.73244859489962	0.759165751109619	0.756317222887568	0.758557102698009	0.673177121693428	0.645232408190827	0.75293666143035	0.735710240671086	0.823595468429215	0.7943488651683	0.845356365024465	0.693322245640813	0.750148859173126	0.672313467733382	0.628610487808611	0.771520323387621
Allose_(1MEOX)_(5TMS)_MP_577900.56_PRED	1.14633686220237	1.14979704764474	1.07694092270959	1.08808687689163	1.13830687306264	1.12850128764988	1.1423457236474	1.14346090963772	1.14500306530738	1.07952375099386	1.10855674491934	1.17159254383779	1.15990591329471	1.14806256916727	1.13389205992214	1.13390314762635	1.1074967062901	1.07457551160157	1.10750711863822	1.11846867012317	1.10006607935668
Anthranilic_acid_(2TMS)_539191.25_TRUE	0.916431548878357	0.887014002426672	0.958545684327506	0.973128825144164	0.861756985735068	0.910877297234733	0.903181058934413	0.810953593737597	0.927931394702668	0.967165064838117	0.965350643376506	0.849715241994838	0.879159257015601	0.871312139644089	0.972165997970752	0.942243891332679	0.959621702398132	0.959792780950371	0.96213706731645	0.926491257813268	0.944132016015287
Arabinonic_acid-1,4-lactone_(3TMS)_526082.88_TRUE	0.674679042365891	0.68385078672196	0.686294706072716	0.530269639511617	0.494619053672486	0.694029156395157	0.714394163142322	0.695899336275493	0.697750203747655	0.474230456248875	0.541736734973435	0.668689905396782	0.655095728373226	0.713484174059617	0.546955710130863	0.705371584454608	0.695373579771543	0.687719608573553	0.689171321951365	0.712451382501435	0.561240182408828
Arabitol_(5TMS)_503104.56_PRED	0.904024519984848	0.916038382014111	0.893658455716152	0.900786718909204	0.898960107000282	0.91061060390839	0.929668984778596	0.892032299510066	0.926501454893727	0.907355519105476	0.898435658923933	0.91652854421769	0.916796307878425	0.904754798510157	0.935520297493189	0.918407371421077	0.9250475126991	0.90411821184301	0.922198791901556	0.894824405595143	0.904538320174568
Arginine [MP-1.1]	1.23319564491429	1.24428150582952	1.26623782399958	1.26440467542179	1.24361334616284	1.23472919727342	1.22278111515885	1.18408700611627	1.24710052647706	1.2429843743953	1.2509096463259	1.23489655111181	1.2460784176892	1.23494742250184	1.24897072262335	1.22757728498614	1.25063477545149	1.23919570815611	1.20830516005354	1.23053709653212	1.25959553486096
Ascorbate (4TMS) [MP-1.1]	0.763062254501381	0.751300361099492	0.824947892593899	0.767837977266236	0.756211890804903	0.724573232940995	0.765826305607152	0.808457387243801	0.739124883457452	0.744091790749268	0.760374143571023	0.737666012133704	0.740042893377283	0.730493771438131	0.740028070520375	0.666834353259161	0.740873414709583	0.744986650409054	0.698662403059713	0.728160849955874	0.842987847050697
Ascorbate, 1-Dehydro- (dimer;2MEOX) [MP-1.1]	1.11918122868201	1.12401006989764	1.12430512907104	1.10028332399802	1.11769941116762	1.11510744555381	1.13935347091766	1.09528600531528	1.1236992961728	1.08022008006065	1.1120317958072	1.11575803488704	1.13025312651544	1.1108182885388	1.12797307796639	1.12072351291288	1.10091747635335	1.0959484158194	1.094167314675	1.11291068940545	1.10817253764175
Ascorbic_acid_(4TMS)_652392.44_TRUE	1.03404315840578	1.03846288287953	1.04102527903422	1.02272230285532	1.03025970110422	1.05031506289149	1.04327715449946	1.01038954461786	1.04477394725329	1.02462898753261	1.03139692160638	1.01353142498091	1.02518189252789	1.03674841392187	1.03665477246408	1.02857404674689	1.03278891841761	1.02261261570321	1.01640324413079	1.0313902081479	1.04963322387229
Asparagine (3TMS) [MP-1.1]	1.22500742327672	1.24610044989875	1.23150037857145	1.19564251949331	1.22548020274232	1.22484548554893	1.24290013771249	1.19788992771789	1.25877120346544	1.18199578855059	1.21061836633678	1.25210537099557	1.25844609014637	1.23778262646809	1.23680149034211	1.25473914554678	1.2194214147568	1.21243791184388	1.20165469671671	1.21386700527454	1.22174113792585
Asparagine (4TMS) [NN-5.1]	0.731113264778748	0.789704133397494	0.812075043960513	0.767640185674125	0.779219147273073	0.776711400703479	0.907226412671511	0.784556246958229	0.784373981225124	0.72755921176885	0.785266855213233	0.815520295043541	0.818116308894399	0.809592236540884	0.848928657732967	0.797455946442375	0.751382581510302	0.775998903278625	0.778396348504194	0.744856159224446	0.783712778677699
Asparagine (-H2O;2TMS) [NN-3.1]	0.91564818579638	0.949838609133112	0.843442583492864	0.848281274408881	0.953541042105589	0.925687792928805	0.943027695296933	0.945539979503193	0.932008411445054	0.842065930716468	0.867308754056505	0.975083228370404	0.968805321699952	0.976396598292994	0.893754276971421	0.908706660386331	0.87793799341876	0.848255971647242	0.878700306906268	0.879414009595026	0.891964893159818
Asparagine_(3TMS)_550488.31_TRUE	1.1049508684188	1.12657149853659	1.10831130459389	1.07755917782426	1.10729705999897	1.11113917498912	1.1319246116486	1.08855645724103	1.1421400638867	1.06523214271788	1.08944729406008	1.13846951783332	1.14374854737647	1.1231021295286	1.11908321261846	1.13390314762635	1.10154928905295	1.09282029881035	1.08745081583961	1.10028573458196	1.10258838720331
Asparagine_(4TMS)_BP2_626664.06_TRUE	0.706848837214859	0.705948271142293	0.717561812023824	0.701078827655851	0.722029572186343	0.725517607049068	0.752154223009257	0.721770892947797	0.730462601729317	0.697634176162129	0.720253978469133	0.731196188520232	0.729739668439454	0.723346430310523	0.726077541733909	0.713699821323718	0.706989192789808	0.704566684829213	0.716176967890613	0.711769534288977	0.721966724066789
Aspartate (3TMS) [MP-1.1]	1.17033408223798	1.1868901357011	1.17130212044192	1.19312019248138	1.19018941868198	1.17084954496056	1.18143900991418	1.1689598571083	1.20299015958787	1.17831338300224	1.19012523988763	1.19932460605128	1.19899062458155	1.18351071843154	1.2125550356934	1.19796524922786	1.20316505741554	1.18394884934269	1.19842400994585	1.18003919646656	1.17678598851275
Aspartic_acid_(2TMS)_458076.97_TRUE	1.01754099526558	1.0372637247608	1.02458539467477	1.04671079610921	1.04355862276994	1.02464256388438	1.03659963991668	1.02715148251179	1.05394111753958	1.03514289221039	1.04850968673556	1.05129493784146	1.04883909049904	1.03857125739024	1.05965076308992	1.05032387391738	1.05384532165685	1.03917618766486	1.05464811747913	1.02912825937583	1.03362939875671
Benzoate (1TMS) [MP-1.1]	0.674315288926481	0.674709586581395	0.671148276314245	0.702842002402616	0.682820852474375	0.695656269482616	0.703161491723405	0.730895846783304	0.66960286664698	0.684725050639687	0.70437369089482	0.669117539671659	0.66371153025402	0.698344083367463	0.674065149730047	0.654282740660921	0.721502950518406	0.684773660777565	0.677815501271487	0.680507818234195	0.685803683071301
Benzoate, 4-Hydroxy- (2TMS) [MP-1.1]	0.784201199561211	0.758539136352497	0.829773567665073	0.846626240513246	0.739276231764431	0.79155540894207	0.77274423218136	0.687663312706294	0.80110051593971	0.844861090858823	0.836786705550786	0.736232284240531	0.750641320848234	0.745876307395814	0.84251504945073	0.81096696920789	0.837566864034182	0.834647981616785	0.830179381930772	0.789024167880999	0.81473674393028
Benzoic_acid,_3-hydroxy-_(2TMS)_507250.44_TRUE	0.773445626976016	0.778784887015625	0.765684455472776	0.759609732706179	0.761718174496428	0.774905359026829	0.803963339124339	0.760439101383061	0.79651370849638	0.772862116974051	0.762224423097058	0.783677715997467	0.782464107469372	0.775784194375428	0.799842677546584	0.785652760656774	0.79173253656023	0.775173731529121	0.795051759813752	0.757751139624865	0.779217250528239
Benzoic_acid,_4-amino-_(2TMS)_650574.94_TRUE	1.11110847789222	1.11468991137608	1.10383147077176	1.08431575918564	1.10139288267803	1.12771732456699	1.12189738234428	1.08212344572097	1.12507031585775	1.09026249883398	1.09698379261483	1.11387384905542	1.12466916013732	1.10992997672896	1.13017470234391	1.1109216600039	1.10905872454325	1.08383739827902	1.08724288751699	1.10947116223841	1.12252472200668
Butane,_1,2,4-trihydroxy-_(3TMS)_345095_TRUE	0.922017421308322	0.897709058228373	0.852524750489525	0.873640265156701	0.863610460198648	0.88272188251973	0.923519886756937	0.883528696307636	0.893791870012311	0.895859130944531	0.860150361417548	0.901094578837527	0.852840386415132	0.879850465744628	0.937033564235817	0.87542539072837	0.906974504454046	0.86313220575454	0.914211790491972	0.910903762420025	0.862749953163701
Butanoate, 4-Amino- (2TMS) [MP-2.1]	1.10153882800911	1.08661216911996	0.927612097418673	1.04862023996753	0.90411776111605	1.07371800377513	1.12827192409831	0.935112529050306	1.04983028275564	1.0798003630377	1.03379676215347	1.0696000164457	0.977170211395844	1.0237564727216	1.14348297960751	0.98831836262591	1.10320314640817	0.922618486749914	1.1211943481832	1.11998743185248	1.00197863508296
Butanoate, 4-Amino- (3TMS) [MP-1.1]	1.08781128422243	1.12705092851168	1.17051888326869	1.14303513478142	1.16777381274273	1.10463293077877	1.08356471395787	1.15183202444881	1.15207131538007	1.10739638335827	1.13051794516285	1.12396827612009	1.16491293810252	1.14488841284373	1.05820961366621	1.17113595502724	1.10707290559966	1.16574062016569	1.08510643339833	1.08141708932647	1.15929806622531
Butanoic_acid,_2,4-diamino-_(4TMS)_519172.62_TRUE	0.667732271885242	0.66653583522112	0.546400078936667	0.632146133577738	0.522833816656228	0.697935604728838	0.770597252167252	0.580873469213948	0.630862565766009	0.606898449079547	0.588920976693959	0.616244879304479	0.526243631939627	0.603513172798084	0.778081778337806	0.536817923862735	0.655787432674228	0.502224407466747	0.699445924788825	0.74444367387378	0.586071433690442
Butanoic_acid,_2-amino-_(2TMS)_249223.84_TRUE	0.676834977002315	0.668369230554668	0.710012687059222	0.731107411380949	0.603126154094849	0.677775064806798	0.672347401535407	0.563847585145758	0.691092364450438	NA	0.698889069997045	0.641205146201312	0.663876511725153	0.663603312032019	0.693620574985929	0.687634301306257	0.709004950619918	0.720619144849503	0.661873765633362	0.67590710231722	0.677807600596588
Butanoic_acid,_2-oxo-_(1MEOX)_(1TMS)_MP_252911.77_PRED	1.15333264752488	1.1884114090102	1.17728942056482	1.22462938207071	1.21030085414648	1.18214387453303	1.24047282622333	1.2811641915503	1.11238783944149	1.2361013963895	1.20771440865804	1.23696878538789	1.23456496093764	1.24472056151875	1.14053724386499	1.26435046235001	1.1548185342151	1.1770162814063	1.29151075641743	1.25119782284183	1.1955395344372
Butanoic_acid,_4-amino-3-hydroxy-_(4TMS)_531278.19_TRUE	1.0008541120848	0.976603031284083	1.03850927125232	1.03993647814662	0.968419605627996	0.996783632047518	0.991012948096618	0.878006954869107	0.993284589491172	1.04317965545475	1.04628757049215	0.961257861512684	0.97914785898901	0.970207033801003	1.04993499731117	1.02609803643203	1.03934736651771	1.03737041410385	1.02529724396433	1.01006010070343	1.02194779292117
Butyrate, 3-Hydroxy- [MP-1.1]	0.614822573739056	0.639354653823259	0.621725559864641	0.648098440746581	0.680551903781505	0.6469978229616	0.699116342897553	0.675948923502994	0.659994063976083	0.666154281920257	0.632677694931557	0.650726260055211	0.640808622250292	0.646422816199281	0.682230939372814	0.659906981957045	0.676443517553886	0.672656371612788	0.681514666060869	0.630657811544478	0.657789997501349
Butyro-1,4-lactam,_2-amino-_(2TMS)_452058.31_PRED	0.938608569976763	0.979742661011375	1.02345927827545	0.997128623906432	1.022765163655	0.961446854897031	0.937475633313499	1.01087747500482	1.00616797197788	0.965099427394549	0.988149854906594	0.983135509912866	1.02241437969387	1.00418468243648	0.910923279459615	1.02607245711598	0.961200106738361	1.02413342540743	0.943124663015255	0.935249640552464	1.0157387678824
Butyro-1,4-lactam_(1TMS)_241244.02_PRED	0.850020765736758	0.894782858671185	0.925796242618638	0.960312678905455	0.813566191785764	0.911857906674935	0.833728571431684	0.651021092896432	0.902280333965177	0.956878704264684	0.931319900561286	0.858996183905699	0.889722991471711	0.838632448207055	0.942130538339097	0.938130103096463	0.961717782095101	0.923681573968004	0.949608228729753	0.871137822961152	0.935114779082955
Caffeine_754467.62_TRUE	0.746756753392159	0.767936690657679	0.773651571749439	0.78748126574306	0.77387701137803	0.76800702752953	0.773157802341049	0.780156804960243	0.772667098518232	0.760361224319048	0.7651155200127	0.780865880067944	0.777123666236364	0.796053922976969	0.785764192845129	0.760751258147709	0.774926185252236	0.785055910464175	0.76819723538925	0.779122353363293	0.771624880522723
Calystegine_B1_(1MEOX)_(TMS)_623873.94_PRED	0.682204075387418	0.699055494957411	0.688145532188956	0.681681581513067	0.695329671677461	0.701259798390019	0.715781972331647	0.699931817015228	0.708025733252967	0.665592722325284	0.689991020499001	0.698552729966827	0.70059259481224	0.697424958351306	0.709220513568611	0.680805617112714	0.669307247160027	0.685450823403295	0.683025367863235	0.685353803998259	0.696596237639259
Calystegine_B2_(1MEOX)_(3TMS)_BP_620736.44_PRED	0.68890053056846	0.695077283458968	0.693031314524656	0.684112355223748	0.69278572608351	0.706254640075585	0.724989286478227	0.699684680145902	0.711478073190837	0.679609988586302	0.70437369089482	0.703196492304415	0.710487438000495	0.70948141270819	0.712717272067735	0.688918241899928	0.679756835402929	0.691348183221333	0.689171321951365	0.696809318887119	0.700305749077963
Calystegine_B4_(1MEOX)_(3TMS)_598843.25_PRED	0.788255530037588	0.794939301134139	0.795081517355371	0.795214449121878	0.82650933662623	0.782086649102508	0.78887203259987	0.769593823025868	0.792041824358209	0.771287474549257	0.782610555506409	0.781416375540383	0.791302673983888	0.783785792047848	0.791534838242174	0.795936217599136	0.781621611103649	0.77703448037995	0.780254950516962	0.785443834670935	0.779796454971475
Cholesterol, D6-	0.908634496014193	0.85030412842769	0.860622265911088	0.884921076283866	0.90099907724848	NA	0.846848766512212	0.930142850522653	0.865637278646544	0.982956071694265	0.909941178390312	0.967420828660329	NA	0.868822866563942	0.854353481748885	0.852533106345415	0.892251601846441	0.852666569930595	0.878133411762853	0.861658862597021	0.880089994194584
Cholesterol_(1TMS)_1079629_TRUE	0.992306488298377	0.927201718619357	0.92608155345761	0.953327705137158	0.97841073127308	0.90857371159574	0.851647564144448	1.00208029354457	0.939818871355111	1.06505971188368	0.99096861691029	1.0493866961184	0.975712349749121	NA	0.939221896972289	0.935016246799967	0.97242526182542	0.918898937222892	0.958445268748863	0.98479718377904	0.954519985519554
Cinnamic_acid,_2-methoxy-,_cis-_(1TMS)_527345_PRED	0.650887912721915	0.641267915917247	0.655935079654006	0.665010605850978	0.659552397880533	0.648673771240436	0.650306421436313	0.660150457118234	0.662785159107835	0.633013020197549	0.632677694931557	0.660658705177782	0.651989106364958	0.642559621076676	0.662213282540285	0.656647926127221	0.635686487763748	0.632702090644007	0.640189792760318	0.629639306750542	0.652041843477309
Cinnamic_acid,_3-hydroxy-,_cis-_(2TMS)_599148.38_TRUE	0.997437663745608	0.988304557329553	0.994533930809558	0.985503393814074	0.969921197229163	0.964113507429267	0.965089269168115	0.930540138884036	0.97659876721151	0.949808096206766	0.96254068228951	0.953534461376088	0.966521839285991	0.948261419274214	0.966484297961323	0.965373557465679	0.969163308085545	0.963170907477895	0.948009618734361	0.981820693213985	0.958048598713024
Cinnamic_acid,_3-hydroxy-,_trans-_(2TMS)_653564.75_TRUE	1.1045667555991	1.10899537437045	1.09551242511956	1.07435378101318	1.09252692322233	1.12104678440961	1.11344391770861	1.07008877950315	1.1179102039853	1.08266489267482	1.0892774424167	1.11130666372343	1.12248102477453	1.10337367909787	1.12598967295964	1.10663863312373	1.10370559580809	1.07668806194587	1.07916538552872	1.10026830385321	1.11704777319768
Cinnamic_acid,_3-methoxy-,_cis-_(1TMS)_587950.5_TRUE	0.734214165384063	0.712168684883638	0.761335288836627	0.77532735835395	0.760751626084288	0.747990632703399	0.763181171447146	0.765479744515808	0.730900771416526	0.739483413936012	0.748980439279582	0.715859700297935	0.727230637622642	0.749932353974075	0.730134880056005	0.718047435949522	0.729503601045263	0.768729408787446	0.737927109763281	0.734553763532959	0.754875424797386
Cinnamic_acid,_3-methoxy-,_trans-_(1TMS)_649428.75_TRUE	1.28914803423845	1.29161558845674	1.28259726560437	1.2618560010002	1.27576059026104	1.29996165372645	1.29079711678929	1.2457856031521	1.29816168377878	1.25983934851852	1.26872970084081	1.28405077992931	1.2978747832004	1.27866847188784	1.30455042786169	1.28548975643493	1.28279835433906	1.25799217528937	1.2563280699025	1.28421929934828	1.29260010127159
Citrate (4TMS) [MP-1.1]	0.903946237002946	0.929424847281544	0.89534090631865	0.91582056509506	0.916687373114916	0.912226447763378	0.935419452838676	0.915432149790964	0.912150729652965	0.911895834834977	0.900467924415879	0.913611420182733	0.919534187072893	0.92007768413639	0.88882758633508	0.89982462016136	0.906035051464893	0.910718787643369	0.91254666016055	0.911592002168915	0.888495808948495
Cysteine,_S-methyl-,_DL-_(1TMS)_354018_PRED	0.781599750329016	0.787181204102982	0.793103188331751	0.781384320963244	0.798964423577914	0.800846879509489	0.814338977161021	0.800785705561857	0.810803988815282	0.787890443107118	0.793196727170858	0.80836318457959	0.799594954919889	0.793765809647156	0.807812091047527	0.799479294840427	0.788708636521294	0.791314659045894	0.793903529000495	0.780174554967274	0.804058709767545
Cysteine_(3TMS)_479326.28_TRUE	0.700831914826516	0.77773180191106	0.768485631202161	0.764422020837099	0.786308722087158	0.795782782610455	0.777794164131294	0.744599265930193	0.772609338161877	0.781207972644838	0.747504777091657	0.734483944218783	0.765085455084131	0.753247532017888	0.732546217899505	0.728453988456149	0.760567652078081	0.789702548668613	0.711026306193937	0.759048114715298	0.782502496628139
Cytosine_(2TMS)_515287.31_TRUE	0.668891107194855	0.662189759028054	0.545742556870355	0.598995790675636	0.582445833251427	0.699278609208279	0.76011141135594	NA	0.63749101074819	0.638725245352612	0.627883066406987	0.632539824721529	0.520896965883608	0.619454524606354	0.775115543466336	0.544746978722406	0.675211178300189	0.507917914716675	0.703740339546403	0.756950314965705	NA
Dehydroascorbic_acid_(2MEOX)_BP_639171.94_PRED	0.925711893584361	0.930546411296656	0.922864477878087	0.907303594143011	0.924971269716544	0.927180293954475	0.947859771077028	0.910456503159917	0.938293378811784	0.887393447940994	0.91765511651685	0.930751976035027	0.935699946812824	0.92760552803679	0.931690075374504	0.925774128829334	0.908705084471532	0.898680979459414	0.89955680545184	0.920563437799474	0.917796873319227
Docosahexaenoic_acid,_4,7,10,13,16,19-(Z,Z,Z,Z,Z,Z)-_(1TMS)_907201.25_TRUE	0.765495268579372	0.824553113954857	0.800461683923523	0.795063398490651	0.827699318855827	0.811533551839093	0.798758564984842	0.785675982131267	0.804776371594753	0.819163933919255	0.81041735005057	0.809953257279594	0.822545388618505	0.801337809592041	0.797875142447956	0.815953708420942	0.816506997782117	0.812254547759028	0.80341252778779	0.815029158444779	0.802001678271199
Dodecane_260776.19_PRED	0.925123878353609	0.959710899942315	0.943926763214817	0.997349188265097	0.980370866541723	0.957404290302193	1.02350971753027	1.06274729435268	0.884502001863076	1.01497317440767	0.981280852848516	1.01037622436181	1.00594558926246	1.02161547847032	0.915233241355135	1.03101058911019	0.926740035182818	0.95005701703715	1.0584650888822	1.02209348673188	0.971910853338062
Dodecanoate (1TMS) [MP-1.1]	0.722698457161796	0.721113205524953	0.741545398125272	0.662813074161427	0.651324825510454	0.72970096275474	0.76209155921709	0.757001437620953	0.725420173923458	0.662880660943395	0.682553666561748	0.716654862650846	0.715140550249831	0.759396894485407	0.633757925848469	0.739455040468147	0.74460340024001	0.731768716163436	0.737729189208267	0.724001409305986	0.649574798944432
Eicosapentaenoic_acid,_5,8,11,14,17-(Z,Z,Z,Z,Z)-,_n-_(1TMS)_838800.94_PRED	0.758741271929538	0.73112159858513	0.689306338006255	0.763395081675169	0.713444982951266	0.710416444695498	0.674458134409274	0.720051031543339	0.690571548705166	0.805921262700355	0.750709277975696	0.708208834475625	0.719964687407896	0.715126579940968	0.727014086568673	0.663611819630691	0.733669442228556	0.700234494594637	0.717565509390674	0.733913936842267	0.696929174459007
Erythronic_acid-1,4-lactone_(2TMS)_462181.38_TRUE	1.00605871607963	1.026475160857	1.00810025148341	1.03216132245046	1.0285623338919	1.01277682821922	1.02305966341461	1.01868004366673	1.04310909116479	1.02130362885107	1.03315017085071	1.04372224675581	1.04264071579227	1.0242743104877	1.05428106566112	1.03933464552358	1.04311621162772	1.02516978999106	1.04479320818785	1.01903206347023	1.02146256139739
Ethanolamine [MP-1.1]	1.07558508163179	1.09766273409077	1.10241525726874	0.898061937149626	1.17940476992033	1.11129990451341	1.09553346841249	1.16588549220219	1.0516740673421	0.85549378288448	0.875695227604224	1.08433308920275	1.12039844291673	1.13756265065881	0.765782173210239	1.05576001085257	0.847734309510388	1.10655732160663	0.851084125854406	1.08847817345224	0.89561752076141
Ethanolamine_(3TMS)_321815.91_PRED	0.976902934659193	1.01438000328346	1.06661394608225	1.03475299260173	1.0891540497401	1.02779633386411	0.988526064457247	1.06549657897811	1.04231972655874	0.985547274313239	1.02397923511898	1.01910023215723	1.06280349126832	1.03769648101618	0.928421384090183	1.03980945380561	0.988116927744845	1.06197077870958	0.948565935586662	0.972056916145897	1.04947381036446
Fructose (|Psicose) (1MEOX;5TMS) [MP-1.1]	0.728992857860061	0.712993642214269	0.722584599475862	0.733996728672132	0.742399622789495	0.733951689547782	0.772899522684833	0.742614002400531	0.742609485149513	0.710838929027561	0.747928619385622	0.760621080525106	0.751194676131462	0.739058179909303	0.788943453095589	0.749847244867356	0.719324530780012	0.659049454377967	0.749946083922132	0.749758094685266	0.788588055485827
Fructose (|Sorbose) (1MEOX;5TMS) [MP-1.2]	0.670605261595724	0.656227907998287	0.672126181385745	0.682599948132465	0.672599730426332	0.693323611645488	0.723385154949359	0.696668417591345	0.696157454213767	0.650398815458389	0.685883889616916	0.714069467413385	0.686241346632253	0.68613079380017	0.738125472131743	0.687202686409945	0.660018900557768	0.610862351625741	0.692368203176859	0.702960705822251	0.73562406326678
Fructose,_D-_(5TMS)_622992.38_PRED	0.943495894249287	0.950299272492687	0.946929903653152	0.926951521205739	0.947881871851176	0.946321110784787	0.971871617574207	0.93663407481384	0.952791112881652	0.915026443665644	0.944919891079176	0.947850395189144	0.960877296353277	0.939788046663455	0.95780720657008	0.947990996158925	0.929095407342296	0.928258783635048	0.927084710615485	0.944991254879361	0.939600400761905
Fucose_(1MEOX)_(4TMS)_MP_522432.03_TRUE	0.7362307257784	0.766139046535976	0.739432894637646	0.656512743520254	0.708341838371373	0.751277921429131	0.777201543695194	0.734293452189219	0.767331180259585	0.687242731135277	0.70716628518683	0.749144154961285	0.737623925940805	0.759232684084199	0.721948360621572	0.759979914802802	0.756565181205245	0.740251008083816	0.7620023998056	0.754658879110188	0.677807600596588
Fumarate (2TMS) [MP-1.1]	0.761823838167273	0.84448165653073	0.77674527400894	0.796315346829793	0.824457461911605	0.820955559534495	0.816797039801093	0.84874956340658	0.809930514615017	0.820047096160809	0.795764599874556	0.81012456235902	0.798954529602971	0.8376736349126	0.817582847490979	0.763030729485353	0.83688239533271	0.859405904720774	0.854377781029649	0.808554864202181	0.77146800354027
Galactaric_acid_(6TMS)_658294.38_TRUE	1.27734488633397	1.27910671061266	1.27345526367608	1.25512826838767	1.26724796154523	1.28830541131045	1.28495676339483	1.23909647338843	1.28617109148602	1.24868304851368	1.26042150312945	1.27708022110119	1.29101782489602	1.26952832212802	1.29184775251602	1.26961807087224	1.27067611516088	1.24974116932695	1.24538232882263	1.27733481455081	1.27963884361699
Galactitol_(6TMS)_590143.5_TRUE	0.681186517353491	0.680032870012118	0.679633770451847	0.670648481338582	0.696512782940742	0.683666078681305	0.702112834491541	0.700096222830862	0.697140586994847	0.658893390314126	0.677126634107309	0.700124978694109	0.69324412062292	0.702718111175084	0.716304482766004	0.692675401002254	0.678414511541162	0.673115273417666	0.683600270358395	0.693041125281537	0.715564267842463
Galactonic_acid-1,4-lactone_(4TMS)_619566.38_PRED	0.766764792087355	0.641976247384299	0.522963232469344	0.553356572462013	0.476890950044349	0.682882960190774	0.9408744918395	0.621650286331593	0.504182813573995	0.606385879941734	0.55803208385897	0.594336109888613	0.543536017708911	0.509183193711937	0.989304413932137	0.504176773260354	0.671581983296417	0.505517254495449	0.805387692173274	0.871989380934624	0.517185394069614
Galactono-1,4-lactone [MP-1.1]	0.650887912721915	0.643610160274637	0.622984655952671	0.662069876107338	0.666637271107925	0.647559607970216	0.632465138934532	0.674566582488961	0.647184230953972	0.637234109977369	0.666421323100679	0.680016207606026	0.683025256123857	0.665181623069603	0.657685222788283	0.664517278654865	0.641045084426981	0.627310538652622	0.643867024171823	0.621656537085867	0.647592508338208
Galactopyranoside,_1-O-methyl-,_alpha-_(4TMS)_585464.62_TRUE	0.967239819390956	0.965297713005926	1.01674734423852	1.00947793521619	1.01989107366611	0.979065717264017	0.980277807253498	1.0057325743193	0.980408229296431	0.966697293132921	0.982208127991425	0.970685863079796	1.01199365098906	0.998138873664958	0.955951540024025	0.996814353861849	0.960661455067337	1.02579106776828	0.957640788272984	0.95888838734283	0.999730394019622
Galactopyranoside,_1-O-methyl-,_beta-_(4TMS)_598177.19_TRUE	1.05368216045164	1.04518142629131	1.05020629898595	1.03971888973665	1.03157438544356	1.02154831892241	1.01310029580031	0.978517106196725	1.02929645231587	1.00785153041739	1.01590940845503	1.01083252706358	1.02292453145631	1.00042786583395	1.02452616165266	1.03078127373759	1.0252786027482	1.01538791958035	1.00046752284285	1.02918342090759	1.01216713350954
Gluconate|Galactonate [MP-1.1]	1.04695244750843	1.05011079816911	1.05053436220548	1.03001736055309	1.04464513093432	1.04403617169065	1.06753105536947	1.0224064957199	1.0519264974018	1.01016713738795	1.04214935702939	1.04230895422828	1.05790650852974	1.03860981382974	1.05477196108854	1.04708574254422	1.02660154047066	1.02216034470323	1.02447951652086	1.04057701640145	1.03792497595114
Glucopyranose,_D-_(5TMS)_644536.81_PRED	0.791807651837499	0.7015803212473	0.590123044948276	0.606676071734627	0.562004784392896	0.712385246563035	0.810587143836616	0.614522775827153	0.62067744842923	0.71745670316829	0.611670378499324	0.680270699213266	0.591052629129204	0.600814405362769	0.895999273399552	0.554260945511057	0.732709762063934	0.568427723720545	0.788228485068614	0.814946594439984	0.586745209476292
Glucopyranose_[-H20]_(4TMS)_561007.94_TRUE	0.71934198066365	0.726600169493265	0.71781256124451	0.749163284983886	0.746712460470399	0.738854259660391	0.772536800110776	0.735437753358531	0.752745620658953	0.740737941482946	0.733631723553575	0.754869553693624	0.727230637622642	0.756792272441965	0.78638739734994	0.732316684374883	0.729231764718923	0.730570134402112	0.738452954693322	0.74444367387378	0.748687985692925
Glucopyranoside,_1-O-methyl-,_alpha-_(4TMS)_613929.06_TRUE	0.682541038425573	0.687078241084094	0.748663699860259	0.784226561029312	0.745268195575196	0.720882859226723	0.730606345765767	0.739010626315173	0.752110173606938	0.734228921660422	0.741524866417881	0.730662920385918	0.746824064037347	0.747308816703199	0.700152526812925	0.742761011243529	0.711631472610288	0.761843010829998	0.726327203258421	0.703950677137112	0.781277293703499
Glucose (1MEOX;5TMS) [MP-1.1]	0.695928982671151	0.709774263883382	0.735391545689542	0.7512006923858	1.00125051452167	0.744661814827078	0.763749890296617	0.766225952059521	0.781453436717583	0.694640784930926	0.680085389581241	0.772918873796664	0.731602033563884	0.820203119789556	0.807013328865203	0.843796423078143	0.713557445615114	0.759093280312213	0.695158976318855	0.67590710231722	0.782502496628139
Glucose,_3-deoxy-,_D-_(1MEOX)_(4TMS)_589111.5_PRED	0.665175793778279	0.664668920755055	0.707137754346745	0.72314569849887	0.70563091710961	0.700494006335641	0.717512500584747	0.727497428118688	0.683122813785947	0.690793530792566	0.6954956171509	0.679377101572934	0.685712447140601	0.705592795247204	0.686218547480267	0.682178307532773	0.674745142727545	0.720619144849503	0.693928420066504	0.686237244367699	0.708128624004501
Glucose_(1MEOX)_(5TMS)_BP_599322.19_TRUE	0.762134841776155	0.752900979716496	0.757138629625021	0.752511095049982	0.843930370976907	0.744025098100067	0.742526209050902	0.72700198656604	0.758424147040383	0.721766265525961	0.737068534361176	0.740955722736714	0.745445614368254	0.745246919634476	0.750229886267294	0.769384905024654	0.736663624024987	0.743785765104551	0.715599455482589	0.744278209664065	0.738509178687898
Glucuronic_acid-3,6-lactone_(1MEOX)_(3TMS)_MP_657311_TRUE	1.35214701205847	1.35365791040435	1.34533575756882	1.3220129490243	1.33761942816874	1.36135231299328	1.352265101856	1.30313180501029	1.35989212975035	1.31970404296926	1.33036091591065	1.34838884897157	1.36357686348773	1.33984012492038	1.36719298336552	1.34786249532137	1.34570454785582	1.31846517513317	1.31576777976292	1.34670430102531	1.35446621770682
Glutamate (3TMS) [MP-1.1]	1.362009275677	1.36306926296469	1.34961533640372	1.34444343011692	1.34752175927831	1.34641327403584	1.37333580512885	1.31796922384413	1.36730306015679	1.33850587117878	1.33413715349697	1.35551920936131	1.35903330323589	1.34005867572878	1.3804465363388	1.36014678371705	1.36760780312736	1.34288403009706	1.35542767910943	1.34480916646399	1.34004051101707
Glutamine ([-H2O]2TMS) [NN-3.1]	0.70483687513404	0.717583960037899	0.771809485159631	0.84485123330649	0.725131887154652	0.706565122657343	0.743989710742261	0.717891168060692	0.718344222902046	0.818511207033303	0.847088993489262	0.656707774597988	0.68610938318846	0.670716722415239	0.787724619670206	0.722522333034556	0.832283783239691	0.747564569224215	0.784609803166061	0.706624384136361	0.826204895369757
Glutamine (4TMS) [MP-2.1]	0.661733947171931	0.626234784288567	0.799156892253911	0.791107551730187	0.594926314231498	0.649958087111962	0.622883918003051	0.557550089533634	0.685895645302599	0.74739643557281	0.719601269211408	0.623268901131352	0.637860579688718	0.624314197785115	0.72224198800024	0.698514993520506	0.72637905104344	0.760509523279137	0.704669660650892	0.658224577671656	0.697591720564538
Glutamine [MP-1.1]	1.31269637612522	1.30194293809799	1.3059040009693	1.28599989421458	1.27385233025047	1.26652584737411	1.26320519707916	1.21775200650726	1.28141353889828	1.24639998328255	1.26078314788496	1.25652241348739	1.27095480715942	1.241231191533	1.27315871246558	1.27718589358221	1.27646956918267	1.26068102944947	1.24126137284716	1.28561724520838	1.25357865482304
Glutamine,_N-acetyl-,_DL-_(3TMS)_655207.31_PRED	0.969760037699429	0.972229921419323	0.962793762203971	0.949596981575633	0.962664841220811	0.986690461590849	0.981452629417598	0.947164657460451	0.982884358857595	0.955637739805409	0.959078275637852	0.973584328591686	0.980290733892153	0.969593975137454	0.985313651324215	0.968317158849743	0.969784056853903	0.950597704706658	0.952736769087744	0.96735793979594	0.985274508100444
Glutaric_acid,_2-hydroxy-_(3TMS)_488906.25_TRUE	0.947008454892499	0.947385431313447	0.970178195120833	0.99913727849341	0.96633049467711	0.95681796687673	0.979981919487156	0.969524241762039	0.960770021147013	0.967709092552414	0.971086321987323	0.948765864981675	0.952295697290112	0.974671872128831	0.958891325774748	0.942208828421338	0.953747381548512	0.974168645491654	0.965526619169455	0.970255271599313	0.969671293418474
Glyceraldehyde-3-phosphate_(1MEOX)_(3TMS)_BP_571519.81_TRUE	1.01035333320492	0.954585963080281	0.987062186772357	1.01359741608206	0.959567433940068	0.98049369583641	1.01779374078225	0.986096178075584	1.03481125657091	1	1.00224719892984	1.00134568967148	1.03379246628289	0.990516432018232	1.03826945891094	1.02425006739091	1.03387141869581	0.958821566060444	0.982048127989526	0.983406412970893	1.03030356013515
Glycerol ((3TMS)) [MP-1.1]	0.961335882046376	0.989006994427713	0.96844489712724	0.968132171499595	0.996416234949383	0.969604716418655	0.983058161946542	0.968445868157298	0.964572777251345	0.985257848043789	0.959573005386991	0.970685863079796	0.980661825846869	0.972577857779794	0.966935550051618	0.980867076732975	0.982922893221542	0.998142856458337	0.992665061789	0.983035987432833	0.984024794552069
Glycerol 3-P (|Glycerol 1-P) [MP-1.1]	1.06907946409205	1.05101476432934	1.01976164483843	1.03403089032712	1.04544406443822	1.0459651333425	1.06738141123901	1.05768558990916	1.07798726597012	1.03175813343618	1.043604225666	1.08093964024562	1.08706988954993	1.06400510039059	1.07400261461247	1.07119131984069	1.06010658137135	1.00502652470578	1.03221443953249	1.03519827028024	1.05509667310995
Glycine (2TMS) [MP-2.1]	1.03371622582803	1.01681696955479	0.873057790953307	0.975024658144609	0.859921202755185	1.02753626274972	1.06799458892559	0.894239565145739	0.985349893547395	1.01571841096114	0.968846847373203	1.00999057065751	0.934566191296651	0.962662221936159	1.06245260865576	0.892178253198586	1.02200801096913	0.861858815544718	1.01626033290668	1.04725417586996	0.937259608403659
Glycine,_N-acetyl-_(1TMS)_334790.31_PRED	0.955974180139795	0.977575332533831	0.970407853267492	0.967699870887878	0.978102025851612	0.965570720781316	0.976160191490035	0.963216957804168	0.973788886106267	0.973280830872827	0.976532626294111	0.972859360976831	0.975204426863045	0.970771535427943	0.980130582860007	0.971265628621892	0.971976197056997	0.97109131723919	0.972264427309525	0.967321079930753	0.965474163935677
Glycine,_N-cinnamoyl-,_trans-_(1TMS)_772530.69_PRED	0.794166305880217	0.799919119423006	0.837110810922135	0.863960689082101	0.819255410046814	0.812323817018562	0.796744481026529	0.843088316015256	0.791516498562961	0.834266758183651	0.852042534345453	0.775768617205059	0.785644581644583	0.832578386388465	0.818979570437213	0.765527065005154	0.823730131621967	0.821164156391892	0.832419087706038	0.838505024171349	0.815780925025636
Glycylglycine_(3TMS)_628479.25_TRUE	0.920794659483736	0.92305589227389	0.921314237071475	0.902970919654544	0.915834048535513	0.92069798172822	0.944040829625974	0.906677720811189	0.926863968497762	0.887423010287864	0.914901415592282	0.923389799665762	0.933464242733177	0.919185410148305	0.932570109307752	0.920556942310501	0.903292436048989	0.902483528833524	0.89862563618643	0.913832231186032	0.912824913524603
Guanosine-5-monophosphate_(6TMS)_1065235.12_TRUE	0.818695052585347	0.807683489274817	0.812075043960513	0.808053328966189	0.828128601090308	0.825163905535532	0.838252430483531	0.846230572540506	0.831137447315778	0.803315958360333	0.812027930243083	0.848491471174661	0.859072442873472	0.88125715936343	0.831448153607549	0.806393084561466	0.798530757038991	0.803106175046149	0.813769049411425	0.848982889277358	0.802424170511451
Heptacosanoic_acid,_n-_(1TMS)_1053682.38_PRED	0.842086331783477	0.841290742845628	0.829985736101401	0.822072349651862	0.860311822482425	0.85667278588771	0.860451609365378	0.85529753166662	0.845808986801288	0.813941535095186	0.810944575427024	0.857671013288118	0.871588024841444	0.892395527297914	0.853983087379343	0.817163031107898	0.801100072444601	0.812787700212055	0.822664859396996	0.837550764502407	0.810057062022383
Heptanoic_acid,_n-_(1TMS)_255612.95_PRED	0.994181354604371	1.03106278371477	1.01882136638056	1.06782257695487	1.05543182604652	1.02764367589999	1.08589377528572	1.14684472353833	0.953492692378242	1.08666003023739	1.05408030526928	1.09174187048393	1.08558441615403	1.09568605425343	0.984952128309528	1.12339247826911	0.997664270778238	1.02149235686463	1.16851351615566	1.09705532592331	1.03944369284198
Hexacosane,_n-_908082.69_PRED	0.651798910846442	0.7164555797496	0.684927565721953	0.679191242373726	0.706582087284241	0.695540923518013	0.681446704013815	0.674994038209152	0.687523401830372	0.695993920659373	0.701948307934361	0.693012220921127	0.703075803885242	0.690848858369913	0.689785398116338	0.699029576541554	0.703771263306914	0.704678203815555	0.688519255929304	0.70698358899721	0.696707340554964
Hexadecane,_n-_486353.06_PRED	0.958182545853369	0.976068757077594	0.99668355554167	0.997576145021437	0.973822861127228	0.969360557737277	0.955025908303805	0.927423147367922	0.978409428469469	0.987405402501817	0.989830496100262	0.975296438239929	0.978984537327244	0.974856142916257	0.977825136148154	0.963410076529598	0.982407663290531	0.977611709289509	0.949950681939648	0.954016636352108	0.999006655430189
Hexadecanoate (1TMS) [MP-1.1]	1.00728569265819	0.988217402795214	1.02777915088391	1.03222485001368	1.01280001192263	1.00396824122605	0.991948284775312	1.02166686610361	0.999056066986213	1.02206658310608	1.02701778964329	0.963253112627748	0.977984623742512	1.03681713747698	0.995147109606428	0.977149678491114	0.993870065367269	1.0070610499317	0.99534656823154	1.0105189877415	0.991925962579711
Hexadecenoic_acid_methyl_ester,_9-(Z)-,_n-_652277.12_PRED	0.968491954400547	0.968366351213055	0.969926079020276	0.955418948264684	0.967049804990693	0.983495664878069	0.97887420170721	0.948855142310125	0.97502593947865	0.958233848148242	0.965871337815677	0.944736203495665	0.955840269223235	0.973540293127108	0.962429253508162	0.954419509324183	0.966796575106848	0.959025416379616	0.951286188409231	0.969563443573014	0.981242917243571
Hexanedioic_acid,_hydroxy-_(3TMS)_535302_TRUE	0.953330352567098	0.923684124786514	1.00110548148611	1.0126186481619	0.90656851127724	0.954023743672414	0.931500682435064	0.842809352137791	0.966037632684883	1.00799487888862	1.00745371199343	0.893696098857707	0.919983316271794	0.907467757548715	1.01547382428349	0.984661079897132	1.00005892042019	1.00061904784722	0.998194010153083	0.959835318428604	0.979998917189032
Hexanoic_acid,_2-ethyl-_(1TMS)_254181.88_PRED	1.06330307323662	1.10462067426894	1.08716911211774	1.13677065403765	1.12636116036977	1.09719249385083	1.15450509286164	1.2243585825264	1.02176549522238	1.15800760145882	1.12354516273039	1.16777549993508	1.15776191093645	1.16553661207366	1.05547684473368	1.2071198212256	1.06921458800319	1.08969770037628	1.27475528463058	1.16738818638458	1.11249280143054
Hippuric_acid_(1TMS)_692751.69_TRUE	0.650887912721915	0.627868697178905	0.670951582280664	0.686925361800556	0.668893020376493	0.536314812880124	NA	0.690063256659951	0.648976220455125	0.682734474884167	0.677126634107309	0.617928954581182	0.637217414565584	0.683092628764542	0.647561414579827	0.625414453337995	0.641911154311994	0.638251725610186	0.653982958258244	0.653682159191651	0.465057340596029
Histamine_(3TMS)_653726.19_TRUE	0.800453959586206	0.813197359501289	0.805468716652127	0.793795835526954	0.809787774723477	0.826662492166372	0.820261443323336	0.806140397160716	0.816640256585541	0.809280168979895	0.814050909246537	0.787665306810475	0.811612472438626	0.813930678677428	0.807644454962187	0.802394307394729	0.809425716073782	0.806640240215424	0.80293795067856	0.808554864202181	0.829644456901852
Histidine (3TMS) [MP-1.1]	0.795241281413155	0.76983786695163	0.824501899753207	0.821530105098019	0.74969555130547	0.768174290485069	0.763749890296617	0.728846877764119	0.807590709741175	0.783994849513867	0.788796138438932	0.758568070023588	0.781040271149092	0.745687912981649	0.845585720604197	0.807589055044234	0.79821066809858	0.811410975631237	0.788936480265586	0.778710202687258	0.810375990422219
Homocysteine_(2TMS)_506276.72_PRED	0.962251127534478	0.973143543737705	0.962393236299561	0.961602978390948	0.963935816297437	0.965947053664455	0.978102549991507	0.942549835707352	0.981863643540065	0.967813620498502	0.959095376051697	0.962006187887759	0.972935451326709	0.962397944697805	0.984552952022565	0.974028386905479	0.977563095187555	0.966463754506597	0.978676971690349	0.947363142053439	0.964735874176534
Homoserine_(2TMS)_380616.94_PRED	0.78243173963315	0.880009806794582	0.939987466869627	0.964526103330231	0.932463580982622	0.949164171080911	0.920507702574458	0.892477823775081	1.01803766195993	1.0194820341788	0.695257290199736	0.957822426603783	0.944686750994677	0.962627489099835	0.991119576258484	0.987700471794035	1.04866158811158	1.05550297744909	1.00772458382157	0.7028362783697	1.01614565756265
Homoserine_(4TMS)_510930.09_TRUE	1.13539971947855	1.14227117820624	1.12773996295378	1.12481433085812	1.12635738829915	1.12966579556509	1.1485113347051	1.10488767760396	1.15022622341767	1.12683854490021	1.12250460316131	1.13653362049607	1.1408904377566	1.12397020542654	1.15914824404483	1.14511457042033	1.14767932136925	1.12753899555171	1.14262319303494	1.11857271007318	1.1274887523944
Homoserine_lactone_(2TMS)_458933.88_PRED	0.965843575257335	0.982201799299425	0.962168736448572	0.99044839842058	0.985770040657432	0.974183053562943	0.983984432961924	0.976983217224604	0.999669309871356	0.980185449174296	0.989465062208655	0.997424446561376	0.996767560349818	0.985633940704109	1.00923538597762	0.993667097514188	0.999823238739415	0.983339046340575	1.00318983024435	0.974773684386632	0.980159277290543
Hypotaurine_(3TMS)_509415.53_TRUE	1.22628047491294	1.23071350439936	1.22551739586834	1.21893133749488	1.22130750373702	1.22025735193841	1.23833890220658	1.19103170115613	1.23363962274073	1.21745006087197	1.21378608245311	1.21488612167682	1.22741714006855	1.21698230602575	1.23912747088478	1.22996361781286	1.23487269357489	1.22028662337882	1.22621304536455	1.21469153202962	1.21759972482413
Hypoxanthine_(2TMS)_659841.12_TRUE	0.713284815070635	0.786554889818685	0.755932433554995	0.753121957180524	0.766548505322693	0.742739336478865	0.723555235031493	0.736061363657672	0.723273694222376	0.774318722515192	0.753080559444135	0.737950282768942	0.749103649918166	0.755321268602162	0.731303085808975	0.744661375683565	0.786160609139145	0.790179391145181	0.766142477294294	0.787790748111164	0.745545488601297
Indole-3-acetaldehyde_(1MEOX)_(1TMS)_BP_657093_PRED	0.745029648679014	0.750246341498413	0.741744359526621	0.73822637703434	0.73789520240452	0.773012947613318	0.761918418185645	0.743611756473442	0.767270274104512	0.744408333485956	0.753880808387623	0.762521705895267	0.784017256696908	0.761774382028734	0.770496094227633	0.75595953644772	0.752541491849138	0.743407524217166	0.737464672672744	0.741167486653382	0.769779057141623
Indole-3-acetic_acid,_1H-_(1TMS)_668169.31_PRED	0.711776478690452	0.710257660653786	0.762317677650648	0.789203881236638	0.758507157685171	0.743384289627351	0.750093801404139	0.76434946416216	0.73194466065177	0.744786845690989	0.760994711412376	0.721043983222974	0.723481757785369	0.758407500401442	0.720168433455902	0.720880213764409	0.722865122904681	0.751065969080317	0.739949250323702	0.747296508794571	0.74334760391084
Indole-3-butanoic_acid,_1H-_(1TMS)_755498.5_PRED	0.726718399802991	0.750164810654115	0.745932098157439	0.753198057431929	0.750081611065421	0.752654248293949	0.756578793211231	0.759690635514467	0.750395768751181	0.745664420122627	0.740694805125815	0.767594060518429	0.754251626038384	0.772535909283718	0.762162263477281	0.746043472984546	0.750283878942857	0.754585095692998	0.756596157861325	0.754209342968301	0.747095723899055
Inosine_(4TMS)_904803.88_TRUE	0.882061105762371	0.945246831889931	0.908833326785612	0.896160495121224	0.931076034654787	0.913219961451535	0.904290731779093	0.895948180560332	0.918732980862724	0.919051452146442	0.921162755736409	0.917805645296378	0.932610004882596	0.916292366913203	0.91209269959082	0.92640440340326	0.92522975391873	0.925527679845453	0.908540106850514	0.933644671079576	0.911042237067332
Inositol-2-phosphate,_myo-_(7TMS)_863697.56_PRED	0.730692663105822	0.732972131022274	0.720775129256161	0.748129057309078	0.717456684719046	0.751804478825772	0.737190285860005	0.742930202286634	0.72040332616799	0.722795120635186	0.746007034352415	0.728967985618074	0.746824064037347	0.747740694593073	0.718660807492966	0.695769781821095	0.694353125843307	0.725536903701149	0.71041757670394	0.738748443744384	0.718282255322691
Isocitric_acid_(4TMS)_597989.19_TRUE	1.03105130921521	1.02273434194479	1.02748998404754	1.02084920036257	1.00027446012084	0.999251109673976	0.999670591115267	0.962987678289612	1.00937368145823	0.984069416358464	0.993540627617236	0.986529026576957	1	0.977136900484848	0.998064115442394	1.00054032763702	1.00370306394147	0.99263894233746	0.978387427391996	1.01340543728825	0.989622027519375
Isoleucine (2TMS) [MP-1.1]	0.739377243625	0.736947544822684	0.732715443873064	0.749637094145084	0.749850151604423	0.750283068728105	0.767423980187752	0.752631099695679	0.733915682022502	0.742558049805463	0.72163847180241	0.740126132568921	0.730420902811197	0.759833455197884	0.742696740677255	0.732501400137422	0.754113565781577	0.740407308250592	0.742246416789807	0.730463384821933	0.744177517274364
Isovaleric_acid,_2-oxo-_(1MEOX)_(1TMS)_BP_269296.62_PRED	0.884430997545428	0.891831458030971	0.899192457656506	0.91152319057059	0.902810003099827	0.895858192918766	0.904758617560812	0.945475955150725	0.874098178377108	0.913847157604749	0.903254473209183	0.91466484631382	0.910987423209865	0.914213187978663	0.888357265866508	0.912143917085352	0.883378967751437	0.893341961667702	0.973646556720022	0.918825469891837	0.899126162871052
Leucine (2TMS) [MP-1.1]	0.810973099824116	0.818762549993424	0.823061676592246	0.815242417709222	0.831843696600581	0.834036790583109	0.838946873494899	0.828950251903788	0.812139167279263	0.819429715766594	0.798863301141304	0.819491514986804	0.811838716826079	0.821492620318348	0.809720161490577	0.808553236835454	0.827087830069639	0.823751183455092	0.821855546781552	0.811758380640251	0.8313492555937
Levulinic_acid,_5-amino-_(1MEOX)_(3TMS)_BP_591715.44_TRUE	0.876641848430576	0.906422809980155	0.969552257737771	0.930853390267859	0.997779016769427	0.909482637083974	0.861199150202591	0.955784578596066	0.924131978406203	0.880441954757916	0.91101115317326	0.925418589870371	0.985398341528376	0.952046360062213	0.822298456884645	0.963504893242241	0.877646625371942	0.981473075177832	0.856605518447865	0.844173655254746	0.937594591631833
Levulinic_acid,_5-amino-_(1MEOX)_(3TMS)_MP_574704.06_TRUE	0.915069907003413	0.922995858540792	0.852763170474077	0.869801066613761	0.915668542150409	0.909035992701776	0.923678909296859	0.925833788780937	0.926099918719456	0.860320679089998	0.89256203101711	0.949396663475656	0.933788292339437	0.931483974790984	0.906231700529526	0.913253915229259	0.890192975409515	0.857744791515551	0.889273598499694	0.886291882672543	0.884968070390932
Lysine (3TMS) [MP-1.1]	0.861074854195428	0.871649107577051	0.91710574690134	0.888720459596169	0.913476627354241	0.877594076315579	0.856135822835234	0.898851510522098	0.920728716663706	0.867017003648144	0.886498865101503	0.890829444231287	0.911323002388598	0.908387861653605	0.843284150456784	0.910047430503267	0.845752552045272	0.893851550905036	0.838634590250862	0.849307332875894	0.945712652208143
Lysine_(3TMS)_631402.94_PRED	0.717920432878546	0.742810196081854	0.722942730245046	0.71736063626843	0.731529293281571	0.731487463841523	0.75285274368668	0.729997266169714	0.742297641621382	0.696200453897799	0.720253978469133	0.745923403091469	0.738332241405332	0.740327426458418	0.735159620314802	0.73451139222471	0.723443328052074	0.714138003468779	0.716423436606012	0.722883293942854	0.727249315048235
Lyxonic_acid_(5TMS)_539863.25_TRUE	0.793481544267214	0.771968163283707	0.848704219462808	0.858252339811148	0.759635600776021	0.799878749814718	0.78596700865565	0.71088434828386	0.813379829129918	0.858235495445401	0.8612243522694	0.747675611323853	0.766871005058515	0.775273475651867	0.860525321474128	0.82686263357543	0.840590779081307	0.852997956671076	0.845937580894311	0.802576963466537	0.834006372197133
Lyxose_(1MEOX)_(4TMS)_BP_488187.75_TRUE	0.745395665477912	0.76423815112341	0.777592390205247	0.786991472597488	0.762471195533494	0.763848007125485	0.742385697672374	0.727497428118688	0.768240377211897	0.777530622336487	0.780035401690249	0.759713883517244	0.769548519786254	0.761720980645202	0.770253404665576	0.756178998767818	0.769291356701912	0.775889271349744	0.741359452679876	0.74260857467813	0.788058019308123
Malate (3TMS) [MP-1.1]	0.936660882038507	0.9504485417498	0.905677561541023	0.943315732609233	0.932578357478778	0.923271148070118	0.950632845544438	0.929509804841711	0.951010557233876	0.956021244390208	0.90645856490244	0.928011998366256	0.938559277236404	0.943383671101149	0.933659472811652	0.923001496698743	0.943727189772291	0.946329189929122	0.946973610262811	0.915211545363805	0.93597827341262
Maleamic_acid,_N-ethyl-_(2TMS)_459686.66_TRUE	0.706316147197018	0.722512833024897	0.695234788663698	0.73751875446462	0.734806993228984	0.722128220689194	0.72648547868983	0.737741849836075	0.74945479358619	0.739483413936012	0.744850663112615	0.750903034387492	0.746028326597351	0.729905277681516	0.755778073676719	0.740909361023941	0.744681282545764	0.741340034803002	0.747465991546216	0.716992078368021	NA
Malic_acid_(3TMS)_442513.44_TRUE	0.8344547536018	0.850609594934433	0.805253639985935	0.847381871362139	0.82755582003249	0.825634637685628	0.856381808703931	0.841967572565488	0.848318064841516	0.861423954281942	0.800377406396602	0.831665921891799	0.842324968482875	0.850857199874369	0.828352872706375	0.822357344140759	0.843935067335978	0.8422645429402	0.849214820283219	0.819192973824548	0.843546885612626
Mannitol|Sorbitol (6TMS) [MP-1.1]	0.882881173818152	0.875354010653491	0.912928497034982	0.913929540663173	0.914456664830215	0.885456878370566	0.898219090083497	0.906312720833355	0.892641402064851	0.876690584196807	0.890970625919858	0.882785441411065	0.901704794060028	0.905588959207808	0.885914287014367	0.897581505726188	0.876514828669789	0.919254789894719	0.878857198346981	0.881901291943421	0.908082021981971
Mannopyranoside,_1-O-methyl-,_alpha-_(4TMS)_559825.75_TRUE	0.744201321414791	0.784826974192049	0.765999465229121	0.775815680643567	0.786900081059873	NA	0.77091435541462	0.808297535608012	0.79242216460558	0.771671525971249	0.772053177069567	0.791787280172666	0.806858226566365	0.807029357912818	0.786800740032538	0.773533522542091	0.763775142143531	0.776708608259879	0.76648793856472	0.754509254632027	0.782642899120642
Methionine (2TMS) [MP-1.1]	0.757368151550337	0.765157815047482	0.770160892959463	0.762496596086539	0.763556613535086	0.782858901367136	0.79182292637922	0.789024214527564	0.80965099373418	0.761695839999192	0.762651277783163	0.789326300839021	0.780681128943677	0.771283584303139	0.777348349842869	0.788136426616453	0.746685404642722	0.77681734983724	0.778439974010698	0.76860741116833	0.78231498421827
Mevalonic_acid-1,5-lactone_(1TMS)_454636.47_TRUE	0.95878191940247	0.977337532678163	0.96498089842513	0.985858642392048	0.981965419224371	0.969048943185934	0.977964592099951	0.973059564816623	0.994973065158259	0.975636607381895	0.987314956868161	0.993925986046648	0.989416420808877	0.979763849934365	1.00064529485254	0.989740767295043	0.992276719628414	0.977956944119769	0.996170621345423	0.968866872109292	0.971338168203423
myo-Inositol-1-phosphate_(7TMS)_788938.62_PRED	0.643785640525532	0.636415821448951	0.633958280117545	0.705552346516595	0.660115310203422	0.649226219053926	0.648153013402417	0.662849489251563	0.682841282362696	0.699247541015906	0.682553666561748	0.658623908881488	0.682342048153976	0.693018524276076	0.716096962016268	0.658386335036196	0.700928919796618	0.704231382892066	0.688082125695341	0.629894891796806	0.696596237639259
Nicotianamine_(4TMS)_902113.62_PRED	0.725062458740701	0.788197867802999	0.749773275234344	0.753274100743371	0.789649845108014	0.762264705686721	0.753922713068329	0.749929852327407	0.761696457963014	0.767362206415027	0.772440187165266	0.760902883108497	0.777972147249365	0.763152752254305	0.755286104959106	0.771606028302997	0.767071050239236	0.768138684514198	0.760809089711681	0.76983809567469	0.756713606937
Nicotinamide (1TMS) [MP-1.1]	0.811069668420542	0.886971284426861	0.865608851519964	0.830447642018269	0.89384399132642	0.861244863414596	0.87004927452321	0.88165681115552	0.852583424218108	0.834898828769949	0.827457992801849	0.849024400526278	0.851327889586997	0.883485522144489	0.867158985386603	0.800097482127527	0.853852772085557	0.849896644737401	0.84626590363369	0.882029406717407	0.839513157782747
Nicotinamide (2TMS) [MP-2.1]	0.625895674552977	0.707570206157178	0.764254932163523	0.751045410642831	0.682521242872505	0.702127848052601	0.651716541302826	0.57133725515454	0.691092364450438	0.742364640535238	0.707272152221767	0.635779285309288	0.656702238261958	0.65609214006879	0.748436344338856	0.656842559520518	0.754042636764881	0.751065969080317	0.731175283405856	0.733085336852	0.720753682268701
Nicotinamide_(2TMS)_455050_TRUE	0.927409298232944	0.951997184641172	0.932183179214019	0.95941662399345	0.954346359028157	0.935943429765875	0.944933824751746	0.947214989052481	0.964211817803413	0.946564160608245	0.957222731403754	0.962477463663571	0.960022264541818	0.951480027937386	0.974602772959954	0.963096551465827	0.963504561416658	0.952429697049504	0.965856639218593	0.93837320651209	0.945139951102766
Nicotinic_acid,_6-hydroxy-_(2TMS)_503069.03_TRUE	0.703060789257706	0.718366472503409	0.694138912008283	0.664100735127515	0.672434150346329	0.692136495538515	0.713833568891215	0.673164083241046	0.712006962574919	0.705166718751329	0.689360285757972	0.702386694899839	0.72062191088476	0.700952148243556	0.72484689872347	0.710998962634967	0.720814905324389	0.693488939179489	0.710591885053965	0.676392816400822	0.694461334280196
Nonadecane_653263.69_PRED	0.95006793773938	0.954619012558015	0.95010123149967	0.940836928000117	0.946713349760522	0.969597326447534	0.964224976811786	0.934432473298991	0.96325157471938	0.942781118652755	0.950940726560502	0.929867476726706	0.939047410140903	0.955287847528711	0.948313621814494	0.940665814298026	0.949287749807994	0.941755550979129	0.937242904797813	0.951463329132667	0.966472164582354
Nonan-1-ol,_n-_(1TMS)_336924.19_PRED	1.11879094243629	1.1378820938561	1.13202330220772	1.13031435020026	1.13598031744557	1.12201786135654	1.1316307835024	1.11487326350097	1.1324157169379	1.12449879919054	1.13255458561203	1.1268093293693	1.12982803155229	1.12350727933797	1.13930117010118	1.12883586770984	1.13000513379627	1.12702678948778	1.12423420313942	1.12599216750493	1.1180386532223
Nonanoate ((1TMS)) [MP-1.1]	0.597537069561814	0.675220600377018	0.730634328705609	0.763188442740543	0.736318728540721	0.749681357765545	0.719124618892881	0.707065203997764	0.802912477249697	0.821096534384739	0.606304218729486	0.753241174683977	0.73699008211393	0.765390867317887	0.778137975839508	0.785652760656774	0.832805213454967	0.844310913007312	0.804755951577278	0.544068607392896	0.811466753002116
Norleucine_(2TMS)_337195.69_TRUE	1.27083852498786	1.28797004230293	1.27846541831346	1.27594299969056	1.28487370379494	1.2672269206313	1.28091795494943	1.2559862465529	1.28018573875796	1.26635608244185	1.27420057835791	1.27604249949617	1.28033767418971	1.2668044419966	1.28577118730885	1.2762613945285	1.2800011359454	1.26884330621923	1.26731620101651	1.27492095445441	1.26215464559953
Octadecadienoic_acid,_9,12-(Z,Z)-_(1TMS)_775215.19_PRED	0.996907339110483	1.00112641168436	1.03554112561193	1.06591883415775	1.01647719210703	1.00407812752693	0.98604206212438	1.02779041021422	0.983483325069384	1.02995164415943	1.05341944135992	0.965494382017547	0.978471542113473	1.02322463232418	1.01341866720826	0.964532691508388	1.02124259748208	1.02113045521623	1.02156441983012	1.03257048115822	1.01282907784304
Octadecan-1-ol,_n-_(1TMS)_754094.19_PRED	0.712533409426098	0.733261279050455	0.728284420285837	0.739540034457693	0.720080156828089	0.730354308746604	0.736072869257201	0.747552535526712	0.729757538123123	0.715864630995068	0.732651171005089	0.739009086238248	0.741116482139097	0.75124808373151	0.742457028314856	0.727489140092992	0.728228718280892	0.742646741511298	0.729753003796916	0.731595374274578	0.727493996865097
Ornithine (4TMS) [MP-1.1]	0.627917043324189	0.645673207755381	0.6799952346148	0.64146792379156	0.823340924654783	0.651943460076384	0.628123322965968	0.68355784845216	0.667490736778202	0.672391907006644	0.654252896429244	0.663859816698224	0.662548992700621	0.66977026084812	0.626708600026395	0.690605282678332	0.633835123488695	0.687983185724553	0.62845249607675	0.625460002735173	0.70094623387963
Ornithine_(3TMS)_(Derivate_not_found)_492548.84_PRED	0.840030666829473	0.854822141950867	0.866417094730509	0.882306878382872	0.85270394603718	0.855263912169378	0.841053692133752	0.819319958387805	0.85503301476672	0.86558831336909	0.873326775247475	0.85281021481892	0.857842367604379	0.854443229856007	0.860077168194323	0.835982312725365	0.862809859651663	0.857720514267305	0.8357829347307	0.834972667627594	0.87851626542052
Ornithine_(4TMS)_572079.81_PRED	1.03975705715441	1.04647098642729	0.974614377434888	0.98244851428488	1.03536830458072	1.02782518882915	1.04399027368341	1.04756004717273	1.04521766011438	0.980162413759131	1.00947415476913	1.06492291714487	1.05491984807601	1.04817224042567	1.0302951755372	1.03154042006215	1.0078471927043	0.976226238164565	1.00768240943643	1.01556070406772	1.00080881794113
Orotic_acid,_4,5-dihydro-_(3TMS)_616339.19_TRUE	0.638505400252326	0.677072738779238	0.729298060132553	0.732980863157411	0.72374258081959	0.705317349438414	0.699116342897553	0.611475719124836	0.67852098743636	0.705917250907478	0.7178078707706	0.697169619506814	0.692131171506732	0.69732230190688	0.707312397008539	0.690326049260127	0.683822281203529	0.7035574015912	0.701473391963046	0.671935456431222	0.737335656001362
Orthophosphate	1.39001218253724	1.40656128546813	1.38569198367642	1.3778762092115	1.39743565505022	1.3788380904544	1.3998296784045	1.36731113926894	1.39600894313937	1.37254400011287	1.37670219681132	1.39761063263346	1.4011623288469	1.37571650408622	1.39756124777544	1.39034923448147	1.39823316537357	1.37295489442292	1.37732324358778	1.39260238996945	1.36705388201397
Oxalic_acid_(2TMS)_236929.91_PRED	1.03516016161997	1.0765716148901	1.10947865986134	1.14269961802326	0.993088500010646	1.09118099788686	1.00844069676984	0.838017148837118	1.08068627933487	1.13149000327933	1.10806768500597	1.03306814321607	1.06710718130052	1.01429566511801	1.12348831529547	1.11530137929064	1.14520527555346	1.10408612599637	1.12478448673755	1.05309638214651	1.1115814900718
Pentadecan-1-ol,_n-_(1TMS)_636157.25_PRED	0.840865092076064	0.86004251609639	0.850388719538154	0.836288374602388	0.84870385327227	0.856970481706162	0.873943034650599	0.845000527233357	0.859297422830976	0.817071868002409	0.842756027920381	0.857924798124471	0.862946402249108	0.857943505333807	0.86290670956927	0.85030284757299	0.831265778774616	0.828473922185111	0.834805480681208	0.845496886166777	0.848441569510074
Pentadecane,_n-_462471.41_PRED	0.820911807412546	0.831771552035	0.816272303573767	0.845159489172171	0.842360357349556	0.833633079200578	0.839477778808821	0.837309814569428	0.859052954850236	0.842603389061849	0.847689239652628	0.85654228199486	0.852815364265187	0.847247812282017	0.866247650982099	0.859129795651032	0.854063632187578	0.844477267827597	0.857564473767719	0.83014630129917	0.842323085055407
Pentadecanoic_acid_methyl_ester,_n-_620606.38_PRED	0.863973174318726	0.870098434288254	0.868979337145268	0.846048180059766	0.862776780918664	0.870904081449294	0.887516667823283	0.852946375200688	0.869151735351765	0.837779658749792	0.863048652747221	0.869699915508676	0.878502919632196	0.866490561383801	0.874795248655773	0.864798853246802	0.845380186885304	0.850863135476073	0.848555261630724	0.861083548305233	0.857869775315128
Phenethylamine_(2TMS)_490740.62_TRUE	1.15338299148688	1.16497240523907	1.18778981350317	1.18646186674785	1.16450720813406	1.1571935899393	1.14400256268107	1.10624899544527	1.16636284046762	1.16825746329563	1.17585544314086	1.15797303291743	1.16734791633857	1.1581295160625	1.16964989989606	1.15157441727132	1.17209304377808	1.16416750325174	1.13191731721415	1.14863188693792	1.18350366500616
Phenylalanine (2TMS) [MP-1.1]	0.784201199561211	0.800369086561595	0.814268969349467	0.811668643142769	0.803205343608381	0.787829350543952	0.809983462637398	0.794778241377452	0.804018036685607	0.784374578802961	0.77260559167363	0.79985378609129	0.805823726811222	0.792835471212425	0.815431436812873	0.800002621108003	0.797382888889536	0.783897850376711	0.786234601461165	0.779239804246095	0.79739310894598
Phenylalanine_(1TMS)_492082.22_PRED	0.920444997288909	0.935446372518193	0.954332984706979	0.959406623316345	0.934347243569025	0.931409114078323	0.91220228406733	0.886553995584828	0.93769009577765	0.941841950731607	0.953459433018596	0.929898108622376	0.935052084020844	0.934089443607625	0.94028725576526	0.922392302994748	0.94302097099111	0.93712893527239	0.910626225429046	0.917765234626346	0.960687341718608
Phenylpyruvic_acid_(2TMS)_575884_TRUE	0.931922886479423	0.934095222252689	0.863514218467434	0.880388221887135	0.928162812442764	0.919312669467304	0.933288936762096	0.939559138044941	0.933724701930458	0.880489539440279	0.905162836355578	0.958106912503865	0.947196737254924	0.938411775233842	0.923417574580407	0.923635133737103	0.900223540509373	0.873027183035066	0.903158858319461	0.907987582830613	0.898705207756214
Phosphoric_acid_monomethyl_ester_(2TMS)_258939.19_PRED	0.875124752193612	0.916343282085694	0.897196017613948	0.948344645512458	0.941480364763081	0.916583596714165	0.976300674502473	1.04847960998904	0.840859288777161	0.973404287016459	0.938324394212523	0.983759612365513	0.974730997822072	0.982043416510176	0.864304252394535	1.01631082151999	0.883378967751437	0.908663954736571	1.09403091809441	0.984657406179864	0.929386226733179
Pimelic_acid,_2,6-diamino-_(4TMS)_654293.81_TRUE	0.814393734035672	0.820824764199638	0.811062230239317	0.801221828818505	0.814182465364111	0.840983650056451	0.832515012940171	0.801903559829865	0.831331062158789	0.811797924550923	0.810831832101193	0.808014110943235	0.818856509425179	0.82441854385267	0.829406483711351	0.816519852505849	0.813560904625564	0.797825193910475	0.804622433767207	0.819588285616337	0.835060681028235
Proline [MP-1.1]	0.91420521284826	0.921909172089092	0.911220855823255	0.916127239682017	0.92094961939186	0.918883463844346	0.939354522048218	0.918430934891397	0.926988671051427	0.902227518393821	0.903493155342429	0.923444298527968	0.925391487023901	0.916880024312776	0.908094259873372	0.922207406049409	0.910376349520599	0.897902880946779	0.911854697135986	0.913660446497437	0.918942632206959
Proline,_4-hydroxy-,_trans-_(3TMS)_450628.06_PRED	0.856800771036774	0.897651348491286	0.941615838238485	0.91818844003746	0.942594984630514	0.886889955614597	0.86081540275896	0.937875810595324	0.927943740292158	0.890076678539922	0.909829353469086	0.905292495733645	0.941422029610135	0.924697787395694	0.829878727582358	0.945509506535737	0.884534097241062	0.947795388395092	0.867730605977232	0.852467483570068	0.940959845885798
Proline_(2TMS)_340374.03_PRED	1.02213869347073	1.0057425179456	0.971904496145308	0.980199519409402	0.996998669189671	1.00224667097807	1.00985306538091	1.01014137849989	1.00011023004288	0.99433137591087	0.970462471345891	0.998864225983823	0.976865814510954	0.999572134166046	0.965707251359913	0.992299029894511	0.995691245631898	0.988618907223748	0.975203498216638	0.993022201191081	0.976888609328549
Proline_[+CO2]_(2TMS)_534232.75_TRUE	0.940848935513699	0.909604185663063	0.985270246324381	1.00028757383553	0.891176193350987	0.937790465856976	0.92697191527253	0.832932317662446	0.952993438683949	0.991626369742738	0.992407024864002	0.88267035707279	0.903607254586687	0.891784128650796	0.997866725004868	0.964617092266383	0.986493100826102	0.987518262974723	0.980741288543485	0.951269219102112	0.963219835891043
Psicose_(1MEOX)_(5TMS)_BP_573563.38_TRUE	0.909231371706974	0.914074993873362	0.843962423697252	0.868781583739388	0.908218679849036	0.901938982726046	0.916185030419486	0.92171694662797	0.916101525922445	0.867017003648144	0.88962770274505	0.939466176512824	0.929421762437261	0.924329490479024	0.904140786493119	0.907364420983693	0.882944833796674	0.850027796430172	0.884032666161092	0.886373698664328	0.880771829987603
Putrescine_(4TMS)_519185.38_PRED	0.696076569959859	0.698651069173124	0.536791660372659	0.640780445086713	0.556439320603384	0.718252619713087	0.802091553797662	0.587980712648726	0.640969453464333	0.623122220943968	0.59396896757682	0.650383115237826	0.537903849480741	0.63853870158168	0.809596815343041	0.522536705240591	0.677660986589285	0.521918819963052	0.725208199397981	0.781215970715746	0.588739554951801
Pyridine, 2-Hydroxy- (1TMS) [MP-1.1]	0.915350690310777	0.939434108669689	0.881228577140203	0.919707362355154	0.955572954626511	0.937902238664122	0.958731730008398	0.912128718607164	0.928534554765147	0.899872749779797	0.893504869437215	0.950347844716358	0.928367479703215	0.958070131499047	0.925644648995217	0.902608049569295	0.905924876638461	0.903980447088239	0.947294148973264	0.929196268156566	0.89243081781888
Pyridine,_3-hydroxy-_(1TMS)_283546.44_PRED	0.656886237435225	0.665793160114457	0.645654318799424	0.64146792379156	0.702229762762931	0.690450426318256	0.693414948214464	0.71748073765664	0.653415848368294	0.602721140745417	0.615448082382409	0.664606968778274	0.66567360702939	0.697629950828025	0.605182373579796	0.620249954195233	0.594661748191795	0.649478135738401	0.641958049163218	0.676231169585005	0.622928032641541
Pyroglutamate (2TMS) [MP-1.1]	1.29330498688482	1.2976432237377	1.286590679611	1.28280494469996	1.28173237343178	1.28139839320455	1.30278392464366	1.25771223243707	1.30347146274916	1.27745925505643	1.273765353746	1.28999114988057	1.29719627226582	1.27656237950143	1.31587706917832	1.30076481748774	1.30365452979764	1.28061678916883	1.29208266569207	1.27669120832107	1.27846387130339
Pyrophosphate [MP-1.1]	0.721438159529785	0.770908570098008	0.713986040562982	0.746598306422183	0.759143451154903	0.774016194058589	0.723044119336141	0.68831536522913	0.767938223222769	0.748068616746627	0.743680776636418	0.801808978163778	0.801241158540684	0.804189986277547	0.783871159711373	0.760261081972906	0.713345255164469	0.75356279806026	0.738583976842643	0.693860444256764	0.768331337022886
Pyruvate (1MEOX;1TMS) [MP-1.1]	0.703473383462306	0.698515903862777	0.675005682300872	0.713162200742631	0.6975529743821	0.754651868464262	0.766875953531099	0.766555750509474	0.793695304229034	0.739483413936012	0.727252874413435	0.793096894054924	0.77393130619861	0.766312860160619	0.784769516728357	0.785214546123963	0.728503266809737	0.729007776991611	0.776945717842617	0.706263904743472	0.74696187667647
Rhamnose (1MEOX;4TMS) [MP-1.1]	0.711649780685239	0.728129664542076	0.733256225141342	0.598299679180246	0.542524687929803	0.730516978562908	0.738001815132019	0.717617742492807	0.732548633254874	0.615929025563264	0.639568829812563	0.717356351365981	0.712130527603453	0.745436158596645	0.649789282115468	0.730826730523839	0.726844656494047	0.733205163226972	0.723390821992004	0.72679320427162	0.608112480134637
Rhamnose_(1MEOX)_(4TMS)_MP_517543.41_PRED	0.744570289968362	0.748271407220594	0.724832121353246	0.607954477031021	0.537636137942081	0.758959545251912	NA	0.720384171394004	0.735848844264821	0.575206341164074	0.629966090592839	0.722713452477957	0.698747180724845	NA	0.789898034665882	0.719840232499337	0.745224781862785	0.714542934811305	0.75632333151028	0.748733068504714	0.596339298082121
Ribonic_acid-1,4-lactone_(3TMS)_550463.56_TRUE	1.00979469872456	1.03456083985873	1.01794842848365	0.982846353519126	1.01219141649553	1.01770019898972	1.03207336297057	0.99647685377923	1.05056309328982	0.979288859491612	1.00004544195843	1.04581772346112	1.05066309390759	1.03047347022681	1.02806100674022	1.04640962129716	1.00746799002241	1.00427892184048	0.998597431471457	1.00178635337498	1.01370181843377
Ribose_(1MEOX)_(4TMS)_MP_503578.66_TRUE	1.05722294191393	1.06503988707962	1.06184627436331	1.05918511196531	1.05972361145396	1.05918159212821	1.0748415984056	1.03840798683279	1.07259093630241	1.06227392523977	1.05444374308412	1.05196062314245	1.06101699107574	1.05618095715108	1.07275665930297	1.06662213532055	1.06984627271343	1.06426010213744	1.07008411791101	1.05041881882472	1.05982497331805
Serine (2TMS)	0.657745884320124	0.685092350673178	0.651991693008074	0.624614400970531	0.707875548922505	0.696688422662912	0.706847623798499	0.705214098669268	0.6684710765242	0.618688450785236	0.642642682573125	0.709257442245704	0.713747114602678	0.719813900647488	0.592587590000099	0.645541576100778	0.62273641573427	0.642893943720742	0.602079837340427	0.671766553645339	0.645755458846071
Serine (3TMS) [MP-1.1]	1.05797548793586	1.06206063638452	1.06313926817187	1.05221845746382	1.06348415770038	1.06275526145864	1.08403853072479	1.05600775423046	1.07131280981978	1.04764585267612	1.05891661324022	1.07014125733322	1.07475238533329	1.0592241455238	1.07454981816996	1.05842103385584	1.05584291021673	1.05402182808159	1.05353613986021	1.05622130823786	1.06582203172109
Serine (4TMS)	0.742992957643036	0.771902259843499	0.745741029140972	0.779110843106503	0.779334723099227	0.768341273346217	0.776505658367344	0.776627297598549	0.783496311591058	0.783145723866551	0.780494681338637	0.792689497674641	0.788679782068681	0.7904305369306	0.795490730036443	0.776027836026497	0.790008609694818	0.775394441149569	0.794201135218763	0.774432520623814	0.767681073758053
Serine,_N-acetyl-_(2TMS)_491357.06_PRED	1.01662119329746	1.03094809193759	1.04889891283768	1.05256297264458	1.03069659627932	1.02712205356695	1.01343214498559	0.983750375710868	1.03769400747082	1.03819498086897	1.04230585220095	1.02857109697225	1.03357010727885	1.02626789521046	1.03749332714083	1.01725836434248	1.03909524063891	1.03047557322011	1.00342359675364	1.01380284116342	1.051232261935
Serine,_O-acetyl-_(2TMS)_410213.62_TRUE	0.748543987801716	0.770039480792163	0.77787322936732	0.528202479143617	0.848177917211294	0.791290674515921	0.776355904208331	0.860301094359642	0.717448688804324	0.43183579473083	0.512385987316538	0.772268725792308	0.800947670128678	0.82247761702182	0.410271709047571	0.731946241323175	0.436324962709541	0.778754828008457	0.491599996695763	0.765832862860283	0.532794447793404
Serine_(2TMS)_328955.09_PRED	0.931609106652902	0.950345224738736	0.937675843792784	0.943876590584459	0.950852095161825	0.938802004002408	0.954926496511762	0.938442496509801	0.944450112690624	0.942747429973952	0.945440592594607	0.950314624185611	0.949359282478482	0.941988552232944	0.954257658538465	0.940380564601616	0.94722782620527	0.937995080072235	0.945275378928697	0.940315344551596	0.936536542176656
Siloxane_596806.25_PRED	0.761901677200276	0.755951821483486	0.763129275672518	0.762148898583533	0.753342426069733	0.734811657502703	0.736967805087345	0.713990609471829	0.75497304032273	0.726957295201397	0.740543142563162	0.721463997347696	0.735629705334424	0.716657680969485	0.744280440746748	0.730826730523839	0.736325894765402	0.745877983215155	0.720757191518115	0.756657533776597	0.729669439859334
Siloxane_739483_PRED	0.67247698800031	0.684473455584496	0.625457833253711	0.732048454039459	0.692514192383224	0.683925757409518	0.698571619431849	0.730117563094373	0.622233882819954	0.652832897952697	0.730072702353335	0.646884617592094	0.673907498569163	0.701445877846302	0.652164893113886	0.651861124008056	0.692149774475697	0.661648982705753	0.634117614421761	0.710968217440546	0.659095521007535
Siloxane_818848.44_PRED	0.628771339648197	0.639112955776559	0.629648668920048	0.722530367369937	0.64391877869056	0.656995685864605	0.650837563129504	0.667340157976426	0.575596282349207	0.637982501812034	0.697848187769808	0.619584860010022	0.626082340303603	0.663458567186705	0.621807976772848	0.637868938817707	0.684389914329913	0.630159604542622	0.613022719651313	0.660893267757627	0.647955878204619
similar_to_Asparagine_Derivate_505075.09_PRED	1.06132307317459	1.06553552206952	1.05239215849252	1.05270284863587	1.05279015821032	1.05641701932162	1.07683837432878	1.03519413567146	1.0739601515069	1.05645399917232	1.04628399245879	1.06548767249727	1.06860050056317	1.05221041640555	1.08613342926748	1.06797873266059	1.07516030801563	1.05388076783563	1.07008858481172	1.04452802823311	1.05243811012151
similar_to_Diethanolamine_(2TMS)_335362.44_PRED	0.739763881135813	0.767249028954293	0.754536498315323	0.757808340615692	0.774968187460992	0.7584081157806	0.770332224594237	0.771057979264833	0.765052738224121	0.769784956020686	0.761303558532442	0.765467293856112	0.767341827867176	0.761774382028734	0.757446852318621	0.762551464524418	0.766883800221815	0.770481014302632	0.764195179906989	0.754584094416117	0.763857169222221
Sorbitol, U13C-	1.03727806365872	1.02015823024115	1.07097338404684	1.08089076128563	1.0584200325282	1.037951474031	1.06375950164206	1.05380305392851	1.03386761309329	1.03004883195895	1.04158843988501	1.01583782199859	1.03233406223537	1.05333717907892	1.03406977625408	1.02391090329547	1.02494029920058	1.06681671425205	1.03160476678818	1.04307801085036	1.05510270354368
Spermidine (5TMS) [MP-1.1]	0.573891799236664	0.588071844756757	0.701723514075292	0.681373605880421	0.663428708298881	0.627112743367438	0.581753833396326	0.673381188025619	0.688327513310132	0.661715995847701	0.648139600109393	0.657029716932769	0.668389065168477	0.676972719807423	0.570147494937438	0.646622537153273	0.60449711232992	0.671111374417747	0.547095823498154	0.585854228349466	0.708819118925367
Succinate (2TMS) [MP-1.1]	0.89484305166503	0.877415621874106	0.882793219170682	0.891975956869378	0.881106641950455	0.882792503326704	0.919020216711515	0.891067376044174	0.907631468452924	0.897646919767771	0.88370577126439	0.899691705621398	0.896339604040258	0.890072062895362	0.900378319150145	0.907100438303026	0.887563904994463	0.861672242640368	0.881395062000796	0.864386063638465	0.913453912761939
Succinic_acid_(2TMS)_365265.25_TRUE	1.12319114257782	1.1027193448351	1.10911580953362	1.11769955339036	1.10196782992459	1.10134556114638	1.13866262516196	1.10381470489624	1.13199395262132	1.11694688254574	1.09742268433653	1.12016881928207	1.11584151784034	1.10782873515429	1.12259548901899	1.1292791986124	1.10642305478159	1.08149556590321	1.09817515203456	1.09442290722484	1.12498774200437
Tartaric_acid_(4TMS)_511834.44_TRUE	1.06334053928011	1.07238267940657	1.06325520617124	1.05965613267107	1.05879157379228	1.06081730538727	1.07696716339946	1.03990476246097	1.07913715560527	1.06159645777332	1.05256281710116	1.06028499857653	1.06933889859787	1.06159785071552	1.07967209995502	1.07376307805094	1.07675445834502	1.06217069468174	1.07500629981823	1.05281072412389	1.06052691437524
Threonine (3TMS) [MP-1.1]	0.894714641524171	0.901909996447917	0.893360046575144	0.902726654071892	0.896461607416101	0.887363107511968	0.902537342995356	0.887178334977673	0.902883870867766	0.885663457335576	0.887640037277992	0.895533212661719	0.905887762195337	0.903242890859783	0.899689636473497	0.885821244454601	0.880927435353603	0.870963050379999	0.87475961890923	0.890520191457978	0.897077287965657
Threonine,_O-methyl-,_L-_(2TMS)_334293.72_PRED	0.648105523987129	0.675390371616551	0.649357670891448	0.646589562200343	0.674240830578928	0.662288686837769	0.672347401535407	0.675948923502994	0.664828831722516	0.680339878596921	0.663022382615915	0.688555738496206	0.670417057896946	0.657178820825265	0.673274552039183	0.661590912840076	0.672222598287181	0.653453922775191	0.666620935154668	0.655483891182191	0.654279098337703
Threose_(1MEOX)_(3TMS)_MP_432507.62_PRED	0.695928982671151	0.742018243475302	0.631969424359901	0.685306282387455	0.748293439897684	0.718711087533494	0.753671989647261	0.775433922024388	0.731075506561434	0.669186856797783	0.687958518744978	0.786194167787276	0.769491067092745	0.785939550449434	0.697315379073535	0.703301300542855	0.683822281203529	0.658521375140674	0.710330306288883	0.684909186210691	0.692627251357148
Tridecan-1-ol,_n-_(1TMS)_547762.06_PRED	0.946297302608335	0.976434146694594	0.958005287867379	0.923920010885195	0.95313597287106	0.959829881323176	0.971106826814928	0.940676429273038	0.987885852015517	0.918965679789349	0.942990485014577	0.986107527926691	0.988470549538121	0.974880686328708	0.965943617203703	0.984445414621119	0.951477052052868	0.946268887983627	0.940382898436706	0.935312809740787	0.953234177584862
Tridecane,_n-_342778.75_PRED	1.12288117049743	1.10195971881612	1.07416672125581	1.08496328397915	1.0923371798995	1.09814380965337	1.11290573008764	1.10717854205516	1.09817667124797	1.08974181360392	1.07040806500939	1.09417996050319	1.07270065354623	1.0985363571391	1.06688543409383	1.09125052952582	1.09297548693773	1.08450709853846	1.07431990009495	1.09490710739086	1.07745919617851
Triethanolamine_(3TMS)_493189.91_PRED	0.93646121591504	0.951123265661056	0.972291393398117	0.971250374285934	0.9483084341713	0.94890076693967	0.937317444464592	0.902133216838889	0.956966071829936	0.961176214525799	0.961243722744336	0.950538646732605	0.95561619977806	0.952463205345282	0.957093848221318	0.937262408795583	0.961181894369702	0.954636675667428	0.924765484421759	0.934768266822996	0.976083896043194
Tropine_(1TMS)_336960.03_PRED	0.984821183513811	1.00553533578816	0.990843012479797	0.991606066276071	1.00217235414579	0.989641107323756	1.0009882266542	0.983595382811299	1.0027100685243	0.994664954480489	1	1.00037859133873	1.00253203374726	0.992818697495003	1.01033419115701	0.998379017088949	1.00087949775255	0.991325289848797	0.99486225496195	0.987507769671729	0.988561682045938
Tropinone_(1MEOX)_343648.91_PRED	1.01210716847138	0.996620764946912	0.959702920490836	0.969508737732524	0.981988912782981	0.991894246175428	0.996551892128035	0.999306568818476	0.992169083779605	0.983930935132239	0.961118124912555	0.989681780558004	0.965315499189274	0.993074048002277	0.961428391939625	0.982891476072394	0.983945526539176	0.976076921600173	0.968148840073825	0.984936769331991	0.968848801012661
Tryptophan (3TMS) [MP-1.1]	0.68714624600952	0.731904861309638	0.72089674920854	0.748766749634954	0.735432203870657	0.702127848052601	0.755906056333661	0.757590511746798	0.718838320203577	0.732103287147559	0.698658696426538	0.750528753485342	0.741724837397364	0.746875036859893	0.758612433860304	0.732869826253373	0.756772573923887	0.749080142060658	0.758751885954517	0.698382434223896	0.727493996865097
Tyrosine (3TMS) [MP-1.1]	0.855774296347803	0.833083570644911	0.843999455479355	0.843640021611459	0.84556666578732	0.837013625830357	0.872148719870308	0.858134067459352	0.886831820257907	0.819163933919255	0.835030568012066	0.865661778594329	0.858601121896355	0.858564951240715	0.860052212364459	0.870025236118517	0.830204049573572	0.822103181968348	0.829637266365518	0.833915974635096	0.861446432051639
Tyrosine_(3TMS)_659029.31_TRUE	1.18866007701197	1.1924304748723	1.18248679057459	1.1609001103781	1.17594237763016	1.20306570667445	1.1948509452581	1.1495611615863	1.20086674667594	1.16364155762526	1.17176543221531	1.19193961289284	1.20515757582183	1.18390906600084	1.20867252432991	1.18845771552355	1.18567534118503	1.16012877712114	1.1603072323705	1.18518416435057	1.1977385557432
Uracil (2TMS) [MP-1.1]	0.717082039863119	0.707817463849548	0.705599369334712	0.744465517172837	0.72601506640624	0.698497389737454	0.706948090490989	0.691421077500188	0.707585743838869	0.752533234070709	0.752341334873138	0.695112742417582	0.700934858848037	0.710654569080808	0.724177978468136	0.716977865636373	0.733321522842102	0.734704039364021	0.753327439694157	0.705660248764817	0.747828678629463
Urea (2TMS) [MP-1.1]	1.18434508628753	1.1619358108421	1.13328198244031	1.13750149631352	1.1510196714307	1.15378667075876	1.15963808730183	1.15467091117041	1.15962630087744	1.14810398804452	1.12693971798761	1.14813146617019	1.13259015946249	1.14815874552413	1.1215450281458	1.15057545578113	1.15246894781842	1.13884972570263	1.13154192337824	1.14038333449622	1.13273702388724
Uridine_5'-monophosphate_(5TMS)_995880.69_TRUE	0.822219303180646	0.66999160606198	0.733794197143611	0.752740598830615	0.707641597777299	0.724917677412253	0.747923295823811	0.758445027630245	0.770271313907704	0.794642310741899	0.755331518884611	0.834435634203607	0.826037944816796	0.830713667768986	0.826976922152212	0.785214546123963	0.755731320904574	0.762722265800428	0.765447884883116	0.749836516149838	0.752243477154571
Valeric_acid,_3-hydroxy-3-methyl-_(1TMS)_235895.11_PRED	0.797962866253531	0.840989560784429	0.869704038336065	0.912464011752023	0.764296156448302	0.862723461617467	0.777646339890289	0.629320015189011	0.854496635935523	0.908316357120967	0.882592046395131	0.812625819129205	0.836342527619866	0.787473121268628	0.89220519081023	0.887036358130403	0.915645796721304	0.877691273749197	0.902569674859555	0.820335166536248	0.889138537447376
Valine (2TMS) [MP-1.1]	0.803355415495072	0.840788278110078	0.837110810922135	0.882456258602313	0.850752184064701	0.838262701560594	0.88463400453386	NA	0.796468135745686	0.883226235065237	NA	0.867269949000201	0.873336499926374	NA	0.820468116520987	0.908576488796188	0.822872952473364	0.842037726724341	0.968167771156145	0.885449447853676	0.857452066613215
Viburnitol_(5TMS)_635711.5_PRED	0.776933205907109	0.787408005699952	0.78750738303246	0.802447460047831	0.784842415439456	0.798778249156739	0.80112280920168	0.786982714572024	0.796786712510567	0.808788512410316	0.784829004964744	0.819335687501934	0.819416825188252	0.813394757866892	0.801103553282855	0.791493881108023	0.797198012022245	0.79693962523627	0.790761408041623	0.775959375365903	0.810658625657855
Xylitol (5TMS) [MP-1.1]	0.760570341811807	0.766626149087784	0.75400813299801	0.776180388741887	0.775088707708655	0.769612269346098	0.776505658367344	0.76434946416216	0.770919703617231	0.768308732561223	0.776918472985297	0.773663777090736	0.782867230068466	0.774244024623639	0.771581035155595	0.772729670222715	0.769291356701912	0.767484848996031	0.767370723305576	0.773505270478826	0.766971787123552
Xylose (1MEOX;4TMS) [MP-1.2]	0.702508078580987	0.737595323741054	0.627274711040669	0.626748482131408	0.740638707691133	0.72405432504695	0.72722521426831	0.752631099695679	0.721176797165319	0.667406196283654	0.668780362500711	0.766854878135019	0.757542342537561	0.771089497837363	0.696183118878439	0.699796592409403	0.687318699042042	0.664349591484427	0.686758929353507	0.67142790332408	0.696485010377791

## Sheet: CB
Table includes multiple worksheets – one for each tissue
hum - humanized mice
wt - wild type
number - animal ID
Metabolites	hum_101_1._cer	hum_102_1._cer	hum_103_1._cer	hum_104_1._cer	hum_105_1._cer	hum_106_1._cer	hum_120_1._cer	hum_121_1._cer	hum_141_1._cer	hum_153_1._cer	hum_98_1._cer	Wt_132_1._cer	Wt_133_1._cer	Wt_134_1._cer	Wt_135_1._cer	Wt_142_1._cer	Wt_147_1._cer	Wt_148_1._cer	Wt_wt1_1._cer
1-Pyrroline-2-carboxylate	0.775900784132074	0.61121376351553	0.63755078328137	0.675020461234012	0.626390213070757	0.710625672500567	0.668225524294237	0.725805786935428	0.598097661089067	0.559028979848827	0.755391485399681	0.589061350969976	0.597665112837521	0.599652590241757	0.585469505080911	0.66366030945542	0.520836496408444	0.574802013040636	0.582369037601323
2-Piperidinecarboxylic_acid_(2TMS)_375026.84_TRUE	0.798887401513392	0.84158248420916	0.801193845985158	0.806625800857656	0.832281603416703	0.829710212832899	0.808395683443338	0.799971814724068	0.823572596079613	0.811902319468067	0.782662260528792	0.807262579042701	0.791831570367875	0.836922264407374	0.828080666220266	0.828436824429299	0.852755794581051	0.857106163586373	0.816778744298503
Aconitic_acid,_trans-_(3TMS)_600462.25_PRED	0.94903142950946	0.952426901961949	0.940072391282596	0.941056325384402	0.931945037773567	0.927007060119187	0.917409814217891	0.916389575437796	0.939500104237762	0.918642070573118	0.929467285939724	0.921660192749003	0.934486835336678	0.924681825377323	0.901091419395293	0.927493338440747	0.925976218912557	0.925376986554696	0.924567700091832
Adenine (2TMS) [MP-1.1]	0.697720552612352	0.733314738123848	0.740165159215961	0.719080982636646	0.733545711241948	0.749174430048613	0.728820921634035	0.734269273795421	0.690844141306072	0.751867693528249	0.72012326409407	0.731067271664866	0.746057817321903	0.72085505751867	0.714169153580649	0.739672483790165	0.700303661188784	0.74848473676562	0.731911814340013
Adenine_(1TMS)_586048_PRED	0.992133119466411	0.972729019697806	0.976608616688044	0.964931735698754	1	0.980893085202936	1.00729993286089	1.00244243605941	0.977295721661595	0.979727888365351	0.992360980113231	0.972615124957541	0.978098550504651	0.981534288471317	0.985563754179285	0.989732009534468	0.965525583792454	0.985098454431415	1.00310890262865
Adenosine 5-P (|ADP|ATP) (5TMS) [MP-1.1]	1.02217137827318	1.02074850812595	1.00674509696888	1.03799999844023	1.01639505393254	1.01136873229101	1.04549802552417	1.03545173705299	1.00799087125377	1.01536580379975	1.03359342329826	1.02453918092474	1.08455650985617	1.056818969897	1.04142264564698	1.06076158729086	1.04124649241861	1.01531358426231	1.02827343721556
Adipat, 2-Amino-	0.65539833805146	0.701494891905594	0.695560951034504	0.681645355671787	0.694840691823434	0.694779689960931	0.706924879212027	0.700726774774434	0.707643392669364	0.695414161652749	0.669350108627829	0.711370812941516	0.724988285199431	0.718835872818413	0.694711696119082	0.696686705788646	0.679158036800161	0.698847171152679	0.702117827413079
Adipo-2,6-lactam_(2TMS)_492238.44_PRED	0.697469247245822	0.728799245040516	0.745219003409935	0.734112139473853	0.718954132153172	0.709553373060379	0.731596890519573	0.713178311613086	0.696832616855839	0.73066417321909	0.723673906196399	0.725079989532684	0.718027847825984	0.714765862478721	0.722136907167159	0.724660569627899	0.692867573102208	0.718468702930951	0.714951158131865
Agmatine_[-NH3]_(3TMS)_578698.75_PRED	0.819191265978175	0.823268893404728	0.802198486767081	0.795352227058035	0.786717398220672	0.83658431874299	0.808109299300735	0.831794798828549	0.837995846494724	0.818935330707659	0.817667560559954	0.830872125770022	0.848679290761369	0.813176420568839	0.799387666805259	0.810884453019273	0.817924713691455	0.809257442609663	0.84279916623305
Alanine (2TMS) [MP-1.1]	1.05618120202476	1.06272491047859	1.05319670659018	1.04830000327379	1.05101920579542	1.06601550755226	1.04902088305207	1.06729275686628	1.07690438354291	1.06518542964198	1.05438155729414	1.05009137536692	1.07660691513333	1.05239043523821	1.04924680151308	1.05825724002944	1.08037448053944	1.06517698869869	1.09962971852428
Alanine, beta- (2TMS) [MP-2.1]	1.01166059211293	0.97703086632004	0.97795058893885	0.96078826035021	0.978253594333785	0.959223322094739	0.980808912425341	0.992908563159351	0.951718742830817	0.966223665540035	0.978030196441938	0.978944838936868	0.985394456045755	0.98607455672934	1.00200676881909	0.978452572236592	0.972871499576557	0.958589764824681	0.995133769918962
Alanine,_beta-_(2TMS)_273369.53_TRUE	1.20388464458521	1.17302380130692	1.17428032764862	1.1620284765756	1.16987180541484	1.15381708289225	1.17452815477541	1.18627389884317	1.14927653544009	1.15602267270555	1.17660750839584	1.17405217969104	1.18315973331637	1.17615400818356	1.1906351918057	1.17470605355188	1.17070751647686	1.1537901717751	1.1896103171626
Alanine_(2TMS)_207563.2_TRUE	0.827397843764103	0.811451932189331	0.824637238000364	0.79823995273464	0.818223001116691	0.829436254209916	0.814836429778082	0.844613304293001	0.821574803554805	0.837695025382079	0.808410005058614	0.817484712971279	0.812810425515317	0.815265608958698	0.813211834319936	0.811709115722961	0.814151811363695	0.817964546394046	0.856987632682047
Alanine_(3TMS)_355868.03_PRED	0.967973596933961	0.972891559179363	0.970411875703582	0.965691747694548	0.969891341072957	0.968526475288935	0.961993104699182	0.96333459459788	0.973654997837636	0.963497584800832	0.958525931611505	0.965120553650874	0.981694035743549	0.982529610149408	0.950600577150633	0.973064093317481	0.971335586474516	0.972529452552844	0.96855032122537
Allose_(1MEOX)_(5TMS)_BP_588062.44_PRED	0.739182842207703	0.687072174887867	0.711536622408646	0.762571571547179	0.75493590449821	0.740958517212625	0.803150821858679	0.940656304377365	0.864790634977595	0.744787079822944	0.780245308531041	0.868644546726745	0.839479964138883	0.720069692719998	0.790372178114997	0.681119213860126	0.790254635752555	0.693147998082052	0.898964880541503
Allose_(1MEOX)_(5TMS)_MP_577900.56_PRED	1.12444930430037	1.08958859624482	1.07458308839739	1.13106068161218	1.08502464191071	1.06083705844254	1.11558360098128	1.09832094041549	1.12273730514633	1.10712756891184	1.13117636332729	1.10549917240427	1.12844518875649	1.14968884556921	1.11109920526768	1.14222198037086	1.15859007179898	1.09561863524191	1.12154684538113
Anthranilic_acid_(2TMS)_539191.25_TRUE	0.907782449143562	0.970721637865827	0.966983291983563	0.925248773882833	0.962628077010709	0.988187222113477	0.927691031037659	0.942643337223243	0.938889687846725	0.946129532234731	0.909474791173219	0.949685068040433	0.925568470845131	0.896879947065893	0.920540084811249	0.891059768300729	0.885653986577184	0.964434162695468	0.925347849482049
Arabinonic_acid-1,4-lactone_(3TMS)_526082.88_TRUE	0.675407466691042	0.690801705651982	0.775739282367375	0.789272389114214	0.714024495277185	NA	0.780098447830817	0.770675325528003	0.785902795409865	0.794016485634514	0.787786417043559	0.778004111438707	0.781270343441431	0.796927574388868	0.769011742613448	0.78294160835089	0.795205386267412	0.787148198782333	0.774682223219261
Arabitol_(5TMS)_503104.56_PRED	0.879749748306842	0.899812816746524	0.89536539029331	0.906562143957129	0.891415667392512	0.894842669425186	0.889424908055206	0.888465232781097	0.90146515761829	0.910002869076773	0.887405937585296	0.894887854565843	0.90774704297087	0.906708008260378	0.88351137044932	0.899799226864631	0.905317325857479	0.910504143099542	0.889443275087568
Arginine [MP-1.1]	1.28833326607634	1.31018456281008	1.31573390135603	1.31332226277354	1.28873459436557	1.27129226074517	1.29806501782523	1.28562265738677	1.27793824190788	1.3001221824032	1.29748273314194	1.30879766371892	1.30507424312707	1.29581255310434	1.26681480244828	1.30928224269113	1.275230688693	1.29146525270107	1.29067981831909
Ascorbate (4TMS) [MP-1.1]	0.724072607870134	0.699890929913497	0.813209042840105	0.727198034050096	0.818828137074708	0.69785175853054	0.695006673602081	0.797861212720831	0.702041614326183	0.74687875247201	0.770123578158104	0.767449760737166	0.701835698494172	0.760480569215957	0.740093183263193	0.784491922991065	0.740194274160265	0.753281713936657	0.711324692506975
Ascorbate, 1-Dehydro- (dimer;2MEOX) [MP-1.1]	1.13015019688538	1.12291633074224	1.12196698414721	1.13582582702345	1.10173299839441	1.11456391743695	1.125739462126	1.11213042592482	1.12482427588705	1.0982530809338	1.12416786012675	1.11042677885652	1.12900240985646	1.13494845309866	1.0909757575426	1.13095220026588	1.11550961466761	1.10751946409619	1.11641899773816
Ascorbic_acid_(4TMS)_652392.44_TRUE	0.804335978097315	0.809648687128645	0.809124599923559	0.812167194294454	0.811858260836449	0.82303806656057	0.805568429423793	0.809103620722444	0.816794009674985	0.808853593443242	0.816747873878687	0.814589216367845	0.810016713033057	0.815265608958698	0.823220167592599	0.815425914052564	0.812161124089509	0.817865146980323	0.817215212424504
Asparagine (3TMS) [MP-1.1]	1.21309647838742	1.21282793216826	1.18121637342115	1.20210935978159	1.20989379001549	1.16811358500345	1.20979695211006	1.23424454799872	1.21376348099033	1.2151800949859	1.2239629235939	1.20864483893052	1.19873138121475	1.21604379087419	1.20686250313299	1.22844911147637	1.21680820065375	1.21386325143175	1.19775006039911
Asparagine (-H2O;2TMS) [NN-3.1]	0.923074119330806	0.837388544484645	0.828964848439415	0.92572274463506	0.839375067412651	0.795376387368516	0.900426738090941	0.868462617986252	0.873423819459133	0.882965678681718	0.923220013834794	0.871770253424893	0.887289206448289	0.946260656067424	0.897867732616473	0.938839633208209	0.934565328086504	0.837930238700128	0.904278275245679
Asparagine_(3TMS)_550488.31_TRUE	1.09289203181365	1.09012524684525	1.05958245580709	1.0775333182763	1.08888651201471	1.05090495908956	1.09015011425586	1.11248688815075	1.09502246870401	1.0959364118965	1.10504753714702	1.09023265885953	1.07743688274217	1.09417481558607	1.08989634399478	1.10866654256926	1.10142803408144	1.09426129087748	1.07647038767293
Asparagine_(4TMS)_BP2_626664.06_TRUE	0.67756281219227	0.660454665036376	0.662082550260736	0.665416982913243	0.65752175269597	0.666671397540661	0.671023557755816	0.65149977501537	0.659461860164172	0.648146609874871	0.65338829121692	0.649668223102586	0.676836853850144	0.681838957185278	0.650851035552589	0.674763204399882	0.662570564323637	0.657955362726289	0.676718413967986
Aspartate (3TMS) [MP-1.1]	1.15455889995547	1.20088169128106	1.1914344406121	1.20408618344093	1.20856378578562	1.18429013402145	1.19358099195356	1.19802011783077	1.2129881539998	1.19972915625624	1.18169137186871	1.21045158821643	1.21231654931899	1.20670335458288	1.20977971297372	1.20088783838707	1.22041340394327	1.20652802676496	1.19456857368475
Aspartic_acid_(2TMS)_458076.97_TRUE	1.00705113192118	1.04993584805578	1.04380118969587	1.0510823434804	1.06083696067964	1.03725686357486	1.04845564562246	1.05228946676318	1.0589355311966	1.05299373071147	1.03477391275841	1.06133597770478	1.0604751942239	1.05645636662407	1.06492129484261	1.0508033461483	1.06303691335951	1.05534470504104	1.04764960347507
Benzoate (1TMS) [MP-1.1]	0.673682050594309	0.65972562249702	0.674493757680592	0.675640493975623	0.719753092186809	0.698555334638103	0.693579637432879	0.671823579591648	0.653128639196916	0.665524985993944	0.687244687799992	0.681654986162734	0.644766875494188	0.663766155546513	0.68902292862961	0.661349408813232	0.659597064369541	0.668244905393205	0.688622810669983
Benzoate, 4-Hydroxy- (2TMS) [MP-1.1]	0.774411582399674	0.839490384748784	0.837611910724442	0.793679487924734	0.827837717829534	0.850194391980603	0.798373026464926	0.811168681810075	0.80801531647619	0.820120154090836	0.780196381284495	0.821902011222803	0.796118233803519	0.771109073037445	0.795045340725356	0.764919101908335	0.759887590010432	0.833734132692321	0.79635800060097
Benzoic_acid,_3-hydroxy-_(2TMS)_507250.44_TRUE	0.743310259982119	0.758077065973462	0.761855060723831	0.762102093040099	0.759829449004112	0.758613471994405	0.755365519791534	0.751727400092694	0.770207880362033	0.774181057223433	0.756508411022603	0.762104313258017	0.773387023566627	0.771162184300051	0.750783684721576	0.764011387926946	0.771135119593786	0.773040668406681	0.758516614791672
Benzoic_acid,_4-amino-_(2TMS)_650574.94_TRUE	1.1465182643008	1.15226849910804	1.14771634326676	1.15333474322449	1.14226265709705	1.15131791194026	1.1444225553485	1.14466843250385	1.14768624402924	1.13331721408399	1.14672471966024	1.1436642678208	1.13954144074945	1.14048011236585	1.13901615328592	1.14492716312302	1.12922634250723	1.1467470248032	1.15148331948422
Butanoate, 4-Amino- (2TMS) [MP-2.1]	0.946405408634121	1.11276359382048	1.04456036928608	1	1.09248126044296	1.13878665645886	0.96172432324084	0.903341258538486	1.12081114068279	1.08738442484527	0.999744644622468	1.06909974609707	0.982386334764034	0.959537663172374	1.02978213774822	0.97341620320926	1.16803834413847	1.1444496391478	0.95649027680401
Butanoate, 4-Amino- (3TMS) [MP-1.1]	1.15801008828789	1.10686740483224	1.14231886626878	1.17500410954336	1.10034996972291	1.0230407820219	1.15690682213007	1.15777073803657	1.11422922181422	1.13709365885054	1.14362286775033	1.14845029103277	1.1776315775173	1.18499298003613	1.16877936420449	1.19679478867867	1.07031456499041	1.07202812735588	1.17684922580528
Butanoic_acid,_2-amino-_(2TMS)_249223.84_TRUE	0.719493249049752	0.697882271237864	0.656905611027006	0.687045336184224	0.696630585667107	NA	0.628676911175106	0.713178311613086	0.669532253852622	0.734315700476071	NA	0.690224950212544	0.643572136555096	0.657655230859129	0.669119946572174	NA	0.649115627974791	0.698098289353913	0.641319695714437
Butanoic_acid,_2-oxo-_(1MEOX)_(1TMS)_MP_252911.77_PRED	1.29451678720031	1.20402740264826	1.207410518585	1.15799492867496	1.21987357644851	1.17675755538894	1.18653395579451	1.18958708690401	1.17356186900572	1.17373583034644	1.16988660922717	1.16931819172978	1.1770129117666	1.26308434528178	1.16209499025745	1.18785429763531	1.21674811933453	1.14521186205175	1.16213642533145
Butanoic_acid,_4-amino-_(2TMS)_342578.41_TRUE	0.946405408634121	1.11276359382048	1.04456036928608	1	1.09248126044296	1.13878665645886	0.96172432324084	NA	1.12081114068279	1.08738442484527	0.999744644622468	1.06909974609707	0.982386334764034	0.959537663172374	1.02978213774822	0.97341620320926	1.16803834413847	1.1444496391478	0.95649027680401
Butanoic_acid,_4-amino-3-hydroxy-_(4TMS)_531278.19_TRUE	1.01617386827877	1.05777947215859	1.05836696997033	1.02670172254173	1.04816351733169	1.06474555800716	1.023629776697	1.0354669962862	1.03126447413633	1.03534840467825	0.9779384525679	1.04000368757786	1.02573399957809	1.0116724514536	1.00962077230204	1.00239381087281	0.992860887551226	1.04795210835799	1.02224487678453
Butyrate, 2-Amino- [MP-1.1]	0.649978837882299	0.674215023042495	0.648893849439788	0.646379574782843	0.64323115325499	0.711245966353938	0.628676911175106	0.651998502155448	0.646960116512641	0.682787536056915	0.627720134959817	0.638184988130072	0.595133828947972	0.620931914271468	0.634162327609715	0.62983642117874	0.629214988299416	0.683705974529961	0.634514108718074
Butyrate, 3-Hydroxy- [MP-1.1]	0.63342911878927	0.651151392604873	0.661264999715508	0.670735529968843	0.675789857698276	0.65747749178157	0.687545174439825	0.659045272926577	0.677280168847493	0.694905702130077	0.626625423245034	0.657623421726167	0.635449594365463	0.633541743170902	0.692968912412054	0.673387706248233	0.694484658120909	0.688889517975446	0.700341126019552
Butyro-1,4-lactam,_2-amino-_(2TMS)_452058.31_PRED	1.00580948020976	0.956106514451769	0.995870221745658	1.02626947522144	0.957223031747521	0.879452616027837	1.01286892134862	1.01595149358816	0.965815073598038	0.993075777668679	0.994598479176411	1.00218643007068	1.02555649548981	1.03775380563877	1.0255423043047	1.04897565949985	0.917745291713701	0.927963820167822	1.03063390204667
Butyro-1,4-lactam_(1TMS)_241244.02_PRED	0.91405583395452	0.963502688758188	0.934982731762565	0.889059018786338	0.94551933274146	0.99539985624781	0.868472284216575	0.887717392765492	0.890338459528506	0.980174401417984	0.883405587331415	0.928214109130228	0.848157038294525	0.885900108482015	0.858869452490982	0.907960307218131	0.898087020290686	0.98730321246152	0.875101474912181
Caffeine_754467.62_TRUE	0.785119825364273	0.781866846455004	0.771728141821745	0.781985076803481	0.780030962927912	0.771665331047623	0.768878179272621	0.783277546271454	0.771308879487912	0.768398802812964	0.774769306638077	0.776674977366406	0.781586092591604	0.778782020852572	0.79324711571353	0.792986964013838	0.788068716825697	0.776282324104256	0.775542982414929
Calystegine_B1_(1MEOX)_(TMS)_623873.94_PRED	0.687715972887874	0.688051997563783	0.687746027989197	0.699431459714154	0.689036106981917	0.692784609891136	0.69885705526445	0.683417308267456	0.688296215915045	0.675394990726002	0.694177770743003	0.674211791463552	0.690282976863475	0.697515923267839	0.682596376036814	0.698543393810948	0.6828231014404	0.674794452439835	0.690265288274394
Calystegine_B2_(1MEOX)_(3TMS)_BP_620736.44_PRED	0.710127143501317	0.694925161696095	0.6973096981934	0.700288254473712	0.682754690300608	0.697447504895006	0.697908039655714	0.689444067143166	0.693453352385258	0.67352198374527	0.700456545901541	0.687288890510742	0.706835609891975	0.716231644068584	0.690205291663058	0.708044241303136	0.701308516603214	0.688536308063558	0.699812619257031
Calystegine_B4_(1MEOX)_(3TMS)_598843.25_PRED	0.806912875286885	0.806839362009922	0.797423781934759	0.807887831931825	0.797881351053115	0.800945711997026	0.790331092101428	0.815276937761394	0.820900172955616	0.794700836517423	0.804859074655153	0.810085562218519	0.80893413542561	0.792329231582286	0.78666512980802	0.792341418420621	0.80045348126381	0.794077015454092	0.812237767012256
Cholesterol_(1TMS)_1079629_TRUE	0.95378320615685	0.927264147163674	0.95445830282794	0.9241673051163	0.91343241826022	0.860284684106306	0.849691898991989	0.999741122672634	0.937128745942846	0.967685702591057	1.03743834989832	0.936147703902881	1.04318240320857	0.936928478848833	0.96313229785188	0.956997743118595	1.02858709604476	0.967036096728361	0.93365343883652
Cinnamic_acid,_2-methoxy-,_cis-_(1TMS)_527345_PRED	0.647769939440604	0.661358844458916	0.660275275582021	0.664388705446269	0.668607307817011	0.661747369282613	0.65651235228978	0.665779987473773	0.666230331474022	0.646016953081824	0.645100097327257	0.655692099046699	0.689259200301258	0.657977674377903	0.658867243421236	0.666514281938511	0.650114543260831	0.654225874046112	0.656496318859762
Cinnamic_acid,_3,5-dimethoxy-,_trans-_(1TMS)_753001.19_TRUE	0.825323483533155	0.826191148377143	0.815613241567414	0.830880614727241	0.824974564243281	0.809015506096688	0.810972345086623	0.823947407039819	0.810802999301381	0.81323527781965	0.81337376979549	0.8224093224247	0.834631703028654	0.817177670300656	0.834531971744414	0.832681914974884	0.832055128701181	0.81888762834891	0.828103888207498
Cinnamic_acid,_3-hydroxy-,_cis-_(2TMS)_599148.38_TRUE	1.0035522958714	1.00645066235067	0.996645529135083	0.996415090445333	0.986060951423943	0.984546843893806	0.968935058852164	0.968128874820723	0.99141200660531	0.972333436063604	0.984805119537844	0.974579821008342	0.987378414851261	0.978572238373044	0.955169209396553	0.984652246424884	0.980774403701711	0.980842263466591	0.979762874149005
Cinnamic_acid,_3-hydroxy-,_trans-_(2TMS)_653564.75_TRUE	1.14100398962851	1.14370741774942	1.13941295751923	1.15015511795427	1.13812773997981	1.14292963313244	1.137773985089	1.13927449207472	1.1478505613895	1.13202763434523	1.14608026880066	1.14242221533618	1.14021422296785	1.14030199517238	1.13975958655095	1.1433351219499	1.13073681144754	1.14356645057373	1.1501953685312
Cinnamic_acid,_3-methoxy-,_cis-_(1TMS)_587950.5_TRUE	0.886798585024766	0.873024348084848	0.870814460949137	0.859062896483959	0.898860968863342	0.885835976134359	0.906925338078579	0.900345074147134	0.874233796047016	0.876477378011529	0.886735629856133	0.86842332140592	0.873035548863714	0.877938281902187	0.886971840605749	0.883075033796476	0.866154003373285	0.882524706551318	0.895277834108412
Cinnamic_acid,_3-methoxy-,_trans-_(1TMS)_649428.75_TRUE	1.3251645747622	1.33026797049197	1.32290770698823	1.33140230825262	1.32031098895896	1.32460981660076	1.31961788998662	1.31991093476402	1.32585301605534	1.30692106412882	1.32294906116293	1.31814000548634	1.3170785686481	1.31441642631569	1.30865107270209	1.32077765307833	1.30281689411458	1.32204808072197	1.32792890150084
Citrate (4TMS) [MP-1.1]	0.904111005991605	0.930038417903862	0.900692921949424	0.910113656387624	0.895245808356122	0.908597760296582	0.896580123185989	0.903439160325021	0.921666157348626	0.909494433972959	0.89259940276645	0.900034876179924	0.904670681370435	0.907492821819511	0.885357008765172	0.902695278794593	0.921175442713043	0.903124915379274	0.903433292555792
Cystathionine_(4TMS)_754589.12_TRUE	0.738422178001266	0.753573666514389	0.756147918505681	0.75119719600084	0.75562283172121	0.735270938187682	0.730064049122966	0.74084390822361	0.74019021646968	0.733970282838925	0.705460107591962	0.738178531603905	0.745983639223171	0.731494375839861	0.716413025925722	0.734934964164326	0.742817421581588	0.740519139132553	0.741219896605199
Cysteine_(3TMS)_479326.28_TRUE	0.78069725501614	0.786674775760837	0.767027503085031	0.805525396668631	0.789076866359228	0.81389842296339	0.762738885772473	0.776296493430933	0.781924790462948	0.815880182237657	0.771731202510925	0.745163735848117	0.776414311872005	0.772113490617968	0.75971601746668	0.79602998449896	0.790586787012432	0.794494814143326	0.807742737849489
Cytosine_(2TMS)_515287.31_TRUE	0.590476635435976	0.74531161204856	0.65447932992685	0.604882641400135	0.757595290437202	0.844449308536845	0.614316237831712	0.525718616953644	0.770730872741554	0.676990587050026	0.628587534017862	0.667057324216515	0.52491281807969	0.613742090570491	0.64138754022634	0.613037266604574	0.807568876886579	0.819574493446274	0.610855997939467
Dehydroascorbic_acid_(2MEOX)_BP_639171.94_PRED	0.934683441148773	0.929833917156397	0.9174453774866	0.938246792195238	0.897984547588108	0.918715506594665	0.923328956922559	0.91299840000139	0.929879142483076	0.90403354182481	0.923400816900616	0.910131634327519	0.928581423969421	0.938238338369536	0.899530712123713	0.936005597126257	0.914072463330197	0.909416580557756	0.912232059950467
Docosahexaenoic_acid,_4,7,10,13,16,19-(Z,Z,Z,Z,Z,Z)-_(1TMS)_907201.25_TRUE	0.809384570761745	0.826265009556182	0.812344672077618	0.820957891190225	0.820688175278119	0.817512138123848	0.79130839159299	0.817514864584855	0.824746079392273	0.838114676927872	0.815126913168363	0.803980841626849	0.814351651678431	0.821612590131584	0.812664151288416	0.820103310150476	0.828239261891126	0.845053199339936	0.832031725363427
Dodecane_260776.19_PRED	1.04709413582639	0.972864486888667	0.981256329067024	0.92780198299725	0.994640848501193	0.948639361298201	0.960329538811513	0.964337822317468	0.946197817349435	0.949122647093811	0.942450971647663	0.940645119127448	0.946098491482557	1.02518338457354	0.944449879034251	0.957760382761771	0.986203063591244	0.917184965122341	0.935012916940555
Dodecanoate (1TMS) [MP-1.1]	0.743471994985063	0.674532795493658	0.744271848672609	0.74778184774644	0.661976866606499	0.699552021948189	0.764074162302511	0.769950310656152	0.743865791742614	0.75250310119195	0.761270981900505	0.758674272291336	0.748621003863066	0.762869593434878	0.747852731427199	0.758929218512961	0.759155535700917	0.763893019505206	0.742343309914099
Ergosterol_(1TMS)_1051145.12_PRED	0.70393171648647	0.696349918691428	0.691727758448441	0.714824452658427	0.702449873602488	0.699353469282887	0.731063019994749	0.723779872706824	0.706244145769669	0.70608808420295	0.72169730316989	0.711746386528944	0.763919754899434	0.743034762924277	0.739161539232949	0.740751736899959	0.72437183713286	0.712680402347791	0.721667714002539
Erythronic_acid-1,4-lactone_(2TMS)_462181.38_TRUE	0.987660465093233	1.03576215266153	1.03208534852542	1.03977758290292	1.04781868257483	1.02329896711939	1.03209211650349	1.03697019270033	1.0493454968998	1.04222160148559	1.0228441883613	1.04966747110768	1.0503989875348	1.04651374246327	1.05334660036873	1.03990105331992	1.06039845595873	1.04615469405591	1.03206918797726
Ethanolamine [MP-1.1]	1.15360963091387	0.813600395554305	0.823864181888727	1.1392240991514	0.826447288200147	0.760584432548295	1.16450786908086	1.09827570926392	1.01015975487282	0.848298451316965	1.12921908222088	0.790593774604578	1.11447070850383	1.11848656282347	1.11676111010339	1.13185550596192	0.996487948716961	0.763554665157077	1.15353874399531
Ethanolamine_(3TMS)_321815.91_PRED	1.06313005917852	0.999951312094131	1.03837824731619	1.06914923855584	1.02453392288984	0.92854149301842	1.06680169441191	1.11658042417563	1.02576279693633	1.02940849741745	1.04886753263949	1.05060111042151	1.07183526681821	1.08263398990145	1.11528891366873	1.08277234273321	0.992255847875583	0.955845445907372	1.10744158686808
Fructose (|Psicose) (1MEOX;5TMS) [MP-1.1]	0.796973632535295	0.809605369585086	0.782364883436808	0.790199673629327	0.801598634266567	0.806843478391426	0.933870996726195	0.833059730265247	0.845164464686557	0.765909113116725	0.815681622611776	0.828605871705503	0.819898198632247	0.812434981893386	0.828682860699687	0.793158422127282	0.790420847398631	0.79741292763709	0.878793511100742
Fructose (|Sorbose) (1MEOX;5TMS) [MP-1.2]	0.752668517911868	0.758005955347601	0.728308403627523	0.746695973432628	0.746651175232773	0.759109827408055	0.881222603340266	0.778326800803803	0.790453463428356	0.70940890991559	0.765086338514414	0.773606699320014	0.763670009881918	0.751873749286672	0.785363378448624	0.739961402363927	0.731669164145013	0.732031709494105	0.82882395283369
Fructose,_D-_(5TMS)_622992.38_PRED	0.957845672987701	0.94379708901595	0.949790739643435	0.964319696059313	0.932860048037178	0.943563300487541	0.954991609423525	0.941380738614376	0.952188166682424	0.929027819919508	0.95052773669051	0.938259056069419	0.953264480723476	0.960804076672024	0.921890072822092	0.957486830928956	0.944809975689743	0.935623940224286	0.945071503777543
Fucose_(1MEOX)_(4TMS)_BP_528624.81_TRUE	0.541987998238519	0.624855040939062	0.744271848672609	0.716193065758595	0.635056135106409	0.694467283918867	0.755726165919241	0.718746319223215	0.706999946254119	0.720437446007943	0.726278904978454	0.724005444184843	0.705964266658602	0.730787034079266	0.706041998206902	0.727225660427129	0.759155535700917	0.706937984152209	0.705781049982529
Fucose_(1MEOX)_(4TMS)_MP_522432.03_TRUE	0.675407466691042	0.690801705651982	0.775739282367375	0.789272389114214	0.714024495277185	0.717746352688494	0.780098447830817	0.770675325528003	0.785902795409865	0.794016485634514	0.787786417043559	0.778004111438707	0.781270343441431	0.796927574388868	0.769011742613448	0.783272436575815	0.795205386267412	0.787148198782333	0.774682223219261
Fumarate (2TMS) [MP-1.1]	0.77766010468353	0.816478859480497	0.778293917775142	0.782538677132154	0.81164271407309	0.817604701043583	0.787077388461041	0.784546010287958	0.793611683716192	0.790799350639765	0.760026494133881	0.781890531308309	0.756151117733973	0.81359769377301	0.805506557418862	0.80766622981931	0.834234451323814	0.841251352287676	0.788454352541352
Galactaric_acid_(6TMS)_658294.38_TRUE	1.31471298826421	1.31856190552052	1.30982572183813	1.32138097839102	1.30915016996073	1.31451278899246	1.30600332037148	1.30471672518245	1.3238238865802	1.29772337458088	1.31289995584359	1.31537426105319	1.32012725315433	1.31707839135223	1.30343892970579	1.31498931569594	1.31528500836194	1.3154082506921	1.31907525573771
Galactitol_(6TMS)_590143.5_TRUE	0.682473082415758	0.610041126918637	0.666544391700352	0.708262996727142	0.68186157727123	0.677962801188298	0.738578106221862	0.872103989979327	0.801302168599391	0.690317111347017	0.713290425356665	0.806636791440444	0.76777550638596	0.661769564017669	0.726988035642563	0.629197876334439	0.733359633803509	0.643250698956901	0.83878502298189
Galactonic_acid-1,4-lactone_(4TMS)_619566.38_PRED	0.529467376450998	0.755922322399072	0.554266764188254	0.478820622235978	0.750779676426744	1.0661896090803	0.473808049987977	0.48620880721953	0.830388576160608	0.58901125989448	0.507826288070441	0.566796446990098	0.531648689065393	0.560946352009226	0.525540962461576	0.498635902240074	1.00371960126937	0.966536411653233	0.487604030687163
Galactono-1,4-lactone [MP-1.1]	0.656896233802278	0.663673593705493	0.651273211826891	0.633762405160413	0.659295223046011	0.664309674040799	0.652784208437454	0.664468265900103	0.6381153804777	0.644010373232661	0.63343698847566	0.651546929189663	0.652580268613679	0.643843201199271	0.647425079957152	0.647698877001638	0.633792701748517	0.633409663235129	0.656496318859762
Galactopyranoside,_1-O-methyl-,_alpha-_(4TMS)_585464.62_TRUE	0.96802947007004	0.943102645226574	0.946253179068429	0.946627900083483	0.959683162615114	0.935863376711823	0.982855040002902	0.9863840957867	0.937485648306421	0.945128798765925	0.965505371303987	0.946282952223226	0.965118777299209	0.96760240449962	0.965779540890105	0.973540618061454	0.925166065371482	0.944886336594825	0.985823370690232
Galactopyranoside,_1-O-methyl-,_beta-_(4TMS)_598177.19_TRUE	1.05924068363403	1.06417623529244	1.05560228012853	1.06032185884449	1.03879230983633	1.0260923859604	1.02444477048361	1.03493155555967	1.05342513651141	1.03111567500692	1.04502008712161	1.03497174455119	1.04896561345539	1.03903517433938	1.01037203006407	1.04214754922413	1.03480904840834	1.03968816920851	1.0412269039743
Gluconate|Galactonate [MP-1.1]	1.05533275054432	1.04832682647524	1.04745033135916	1.06320419947403	1.02921540139555	1.04296366056183	1.05121153582224	1.03873630600573	1.05063015014707	1.02521783492766	1.04813867172279	1.03536746438191	1.05617987258347	1.06237242111655	1.01972834696975	1.0566144650202	1.04278792776264	1.03260213379317	1.04087641060515
Gluconic_acid,_2-oxo-_(1MEOX)_(5TMS)_BP_593592.06_TRUE	0.65330282817391	0.658622392410554	0.655004091381339	0.643049263761385	0.636464891282186	0.646695643033615	0.651119652435136	0.636051236213462	0.641216667631508	0.628917145270811	0.651507916972575	0.638953853818912	0.63631273448057	0.64476343546696	0.635587428857257	0.643331989808068	0.625693460911455	0.636207120101842	0.637291093960899
Gluconic_acid-6-phosphate_[-H2O]_(5TMS)_762561.19_TRUE	0.65633705011168	0.532147115224048	0.594215301850801	0.655211111795831	0.552233234338985	0.501795072322875	0.675478376528724	0.688522001760448	0.489417259392726	0.574627608917359	0.634461426604891	0.592139356103975	0.683439240964113	0.680298500936165	0.66394985785446	0.670151887854332	0.483223283270344	0.489891762088729	0.687073589227437
Glucopyranose,_D-_(5TMS)_644536.81_PRED	0.518800098937829	0.786458525507655	0.603837817381727	0.558724150919187	0.743476509268897	0.918930739787993	0.564667585394258	0.554098345421105	0.772683010948695	0.705263503698916	0.622584365931112	0.663508371318182	0.582905027572965	0.572734822038046	0.618650789441985	0.548599398759218	0.944274268913292	0.893982581295367	0.548467758683207
Glucopyranose,_D-_(5TMS)_678044.25_PRED	0.740770633171148	0.771403480825295	0.73947725032237	0.735424011768733	0.747125741253713	0.753975171450054	0.740686725668272	0.743844064598997	0.738143154017896	0.751228256155119	0.744955729291147	0.74455431696075	0.734785939173475	0.741484199703072	0.713885049403932	0.747669046137647	0.727585830507009	0.756782121120995	0.731524323466178
Glucopyranose_[-H20]_(4TMS)_561007.94_TRUE	0.740936366409491	0.75642910098539	0.757636831426332	0.72998252190458	0.771179848407713	0.777563344835368	0.747024095267781	0.751478393203978	0.777516057626945	0.760258610443702	0.735476529565466	0.77426838781294	0.749485349495227	0.758696375366367	0.746225899423718	0.758328508020528	0.773957855086792	0.773554024442297	0.752440231048056
Glucopyranoside,_1-O-methyl-,_alpha-_(4TMS)_613929.06_TRUE	0.743955695090759	0.729269089616878	0.737931874410718	0.721692565670469	0.750649071289428	0.717746352688494	0.739918631996211	0.772262548583374	0.728479563841756	0.739817956694319	0.740866938820609	0.761760723656754	0.745089315916533	0.746405889217598	0.743629060250436	0.762055265921017	0.69133466362232	0.727225284447008	0.768983528299604
Glucose (1MEOX;5TMS) [MP-1.1]	0.752223803744903	0.700387094843288	0.716065339685917	0.771233859842747	0.765351507514809	0.749598430022592	0.808966043726518	0.935159453707467	0.867477767689735	0.749285246410868	0.782853168295049	0.873317054371487	0.843015687937179	0.731963227914714	0.78764715054931	0.688306046491712	0.798440445924585	0.686028952381403	0.897922806124397
Glucose,_2-amino-2-deoxy-_(4TMS)_BP_659366.94_PRED	1.19383542541069	1.21754940285858	1.21500774599651	1.19568344424029	1.21157494675111	1.21809316713212	1.21294538712019	1.20164121113136	1.17923875081384	1.17381261350141	1.18797653296356	1.17664398990433	1.16602765539594	1.16702215356597	1.1750849944919	1.18161372320024	1.14883920865702	1.18677618833985	1.19506941743157
Glucose_(1MEOX)_(5TMS)_BP_599322.19_TRUE	0.768929772263869	0.764553422128436	0.765371865592929	0.767664171681945	0.759709925054294	0.74451631184658	0.753971072710464	0.800396431679527	0.795770773888131	0.754724182292991	0.764288844918343	0.783525037013215	0.791067532490307	0.760657284911703	0.742942542516111	0.756013008176953	0.75779000554603	0.745898110842092	0.799435320488246
Glucuronic_acid-3,6-lactone_(1MEOX)_(3TMS)_MP_657311_TRUE	1.39114967775742	1.39435225526095	1.38691502318579	1.39842721993531	1.3836701405542	1.38672655424563	1.38149919898129	1.3828603455971	1.39547205837202	1.3719640231035	1.38896872060636	1.38604715419066	1.38689303111954	1.38394321925122	1.37371508845402	1.3873563296979	1.37375085310292	1.38748539613869	1.39326970628599
Glutamate (3TMS) [MP-1.1]	1.34332364427818	1.35240889156234	1.33999415200951	1.35904670206748	1.33627446775878	1.33775434361141	1.33603419323968	1.32833777282261	1.36062601788617	1.34758962227726	1.3349821703313	1.3442376939176	1.36012145688391	1.35473806504985	1.3176311302571	1.34549908896152	1.36107109829415	1.35765615598394	1.33723810796218
Glutamine ([-H2O]2TMS) [NN-3.1]	0.714915684526394	0.813266300895314	0.853318284982523	0.738675098219706	0.833101014601959	0.827020947702726	0.720262634471784	0.717535072416223	0.737824580865524	0.806285668026101	0.711484350488649	0.795240585170484	0.708982298028503	0.703869839448701	0.707797514941218	0.716826002044085	0.696706104010258	0.790801269506886	0.720549749665639
Glutamine ([-H2O]3TMS) [NN-4.1]	0.578939373598824	0.671474048578367	0.712737402125366	0.616979172059971	0.668607307817011	0.684385452270694	0.594999612748754	0.632497813848546	0.630719838577428	0.657579485321411	0.56902752357441	0.643449033910757	0.652212551141	0.569339020398435	0.581743548430498	0.559728104769969	0.545920983831664	0.651378825623203	0.571776606239284
Glutamine (4TMS) [MP-2.1]	0.70393171648647	0.79537393322862	0.804911655179731	0.692573003116514	0.781442404452224	0.880517325388701	0.68335438313973	0.728419628929427	0.701020664870948	0.709937263839051	0.667891003452616	0.730523112002927	0.683846659433959	NA	0.654031749840904	0.648054488574042	0.629823933561749	0.780386272990876	0.68897700463195
Glutamine [MP-1.1]	1.3217697764266	1.32354400833803	1.30875463192588	1.31722887734928	1.2923332194377	1.27919323918227	1.27517977835273	1.27934146376795	1.31021828544363	1.27969629981907	1.29589565843255	1.28635128764966	1.30566002497176	1.29427280338978	1.25235679847934	1.29618671255889	1.29298053661921	1.29350502267336	1.29018044392448
Glutamine,_N-acetyl-,_DL-_(3TMS)_655207.31_PRED	0.998009950557731	1.00407743584211	1.00459400432631	1.00039380278573	1.00073104394493	1.01249587720652	1	1.00172198731376	1	0.98898364171627	1.0007660661326	0.99431878391931	0.990371386252291	0.99107591324873	0.997091105961969	0.999202063042398	0.979945327464036	1.00015391223447	1.00482552263183
Glutamine_(4TMS)_494755.44_PRED	0.577352858531461	0.681585918444012	0.700272103541107	0.606097335665263	0.668461298923719	0.680867813862681	0.595580769195502	0.610614160333653	0.625635212534674	0.645018654731774	0.563870066292011	0.639906846925658	0.643572136555096	0.554054059973207	0.552250902203695	0.498635902240074	NA	0.641207037874509	0.564049520863764
Glutaric_acid,_2-hydroxy-_(3TMS)_488906.25_TRUE	0.933509105226415	0.952985567609814	0.949830360101384	0.938996120151171	0.966663771877999	0.970182329935648	0.961819268417898	0.953787470320343	0.940039677892968	0.930664260315829	0.928875457616615	0.941257630830315	0.931262924119677	0.930136835053137	0.950619977694359	0.940793781484384	0.927071624253548	0.938169921696879	0.952026823660208
Glutaric_acid,_2-oxo-_(1MEOX)_(2TMS)_BP_486148.94_PRED	0.61568777880061	0.652923684389587	0.651453978032752	0.63850960519571	0.65149246900352	0.612590213267587	0.652949175385934	0.614043878781874	0.614645229498113	0.650232213313129	0.637672241113135	0.643632096350324	0.639278082417111	0.638140416640826	0.634639650698802	0.648585593422294	0.615966793171185	0.631775945555807	0.641695197892813
Glyceraldehyde-3-phosphate_(1MEOX)_(3TMS)_BP_571519.81_TRUE	1.06026125703262	1.06865374326546	1.04033014096349	1.04023111988425	1.02085436184792	1.07120518404306	1.05016856361117	1.0718551162476	1.08646537407611	1.05978894958846	1.053283404461	1.07201735966123	1.09240525717503	1.04990674893002	1.03312669005498	1.04659400033409	1.05639027368577	1.04559574971773	1.08685788037421
Glyceric_acid-3-phosphate_(4TMS)_606948.88_PRED	0.646133453360779	0.656001776323596	0.653598728467048	0.581325504561994	0.693591687666138	0.700243900365731	0.69662875107173	0.679444856120967	0.635994763831517	0.659480564156793	0.640976631364856	0.593344982248326	0.615686230833109	0.587239724983798	0.614845843263696	0.605781187117701	0.523180857070499	0.615517398270121	0.717030893846611
Glycerol ((3TMS)) [MP-1.1]	0.947794602635539	0.955649621884076	0.94588337057107	0.940912232158727	0.948575725496136	0.942824537080525	0.935133107967386	0.940053516200274	0.939714023397087	1.00867209346919	0.932860214851032	0.935524427439265	0.934116262544597	0.946898401961262	0.968568136752342	0.953613635131648	0.963662994094289	0.973678275459308	0.97050558280934
Glycerol 3-P (|Glycerol 1-P) [MP-1.1]	1.08346218557518	1.07229938805206	1.04992900966319	1.07487490909039	1.04114949722314	1.06747028393666	1.07357416929359	1.07828999359642	1.09575997741903	1.07579983709722	1.08039392361492	1.08177363812377	1.10303980720388	1.09110349888981	1.05845466656963	1.08432306068837	1.09267486552905	1.05957540196462	1.09507320393239
Glycerol-2-phosphate_(4TMS)_556161.06_TRUE	0.598604402703342	0.637368155812858	0.615237761509691	0.602096493443256	0.623254298202374	0.668979188428542	0.626348561584778	0.615479060428395	0.594635834360733	0.58930224800315	0.611975858898905	0.596588719140762	0.770268190964074	0.58396850618182	0.617901441379356	0.579593352858131	0.556880788210639	0.613812921964539	0.607504663460834
Glycerophosphoglycerol_(5TMS)_761775.38_PRED	0.65633705011168	0.532147115224048	0.594215301850801	0.655211111795831	0.552233234338985	0.501795072322875	0.675478376528724	0.688522001760448	0.45491852545546	0.574627608917359	0.634461426604891	0.592139356103975	0.683439240964113	0.680298500936165	0.66394985785446	0.670151887854332	0.483223283270344	0.489891762088729	0.687073589227437
Glycine (2TMS) [MP-2.1]	0.880854197723924	1.05538944994117	0.971812697057479	0.931655850913858	1.04892371674395	1.08441775665432	0.912495471023676	0.871013670061686	1.06568133562737	1.02026050993947	0.944017895164225	1.01542835763009	0.969535908409524	0.894924993239252	1.01139750993424	0.894449182846109	1.1220872696128	1.06876049872848	0.921963201764065
Glycine,_N-acetyl-_(1TMS)_334790.31_PRED	0.973001022923174	0.993189763983135	0.983806509611216	0.989425210167217	0.980749095349898	0.97611102878045	0.981443387508799	0.977176204692342	0.976637550189494	0.980738757250623	0.975754794927097	0.984981149888262	0.981905227771378	0.990123639829655	0.972908387963194	0.987185343124467	0.973841868212844	0.981002863905752	0.977151752793903
Glycine,_N-cinnamoyl-,_trans-_(1TMS)_772530.69_PRED	0.82616549572285	0.820496599038323	0.842172321637264	0.818370549058239	0.826540574737426	0.832383071741875	0.811597778498037	0.799428815279317	0.774766205784342	0.772589506755046	0.81688464741799	0.809081160362223	0.795017034996793	0.787513878959749	0.799387666805259	0.782894259513101	0.776799150399055	0.818525985596981	0.81199121616374
Glycylglycine_(3TMS)_628479.25_TRUE	0.926946990839346	0.918163049787182	0.923044475177247	0.9343912573787	0.901401200202003	0.918146903349913	0.924225624188111	0.913290645845347	0.920330959069194	0.901595725771399	0.918832239393473	0.909997853323124	0.92778229159028	0.93517671978619	0.895228915564681	0.932709402756739	0.917140336055076	0.905565093890215	0.91598774064384
Guanosine-5-monophosphate_(6TMS)_1065235.12_TRUE	0.806956748928412	0.792349883268384	0.790800171635114	0.81543591967267	0.811065688789852	0.789319089725462	0.807209115503492	0.801697781676236	0.792021101388805	0.799148186300558	0.789409082465841	0.794619272692468	0.823144588824165	0.827496162506488	0.815854952993311	0.818679111159797	0.827464309725503	0.792601080893736	0.801018407052125
Gulose_(1MEOX)_(5TMS)_MP_584150.19_TRUE	0.669486165889379	0.653895403838573	0.681062929663848	0.648809046402258	0.695851363986254	0.699254046476902	0.686008681161454	0.698021310801228	0.662984131363732	0.682672502034545	0.681363854320021	0.668643508308552	0.663374202571119	0.675396881792181	0.683568097791731	0.672553420256339	0.661982799886853	0.678244553980339	0.688385995868555
Heptacosanoic_acid,_n-_(1TMS)_1053682.38_PRED	0.822416067184579	0.81393342110856	0.805880767853559	0.82717551874725	0.817104186372036	0.812610565152175	0.839583376618288	0.831992602665922	0.803138350714919	0.818127630983823	0.829832952840903	0.82291411984136	0.878022619211429	0.856770953218632	0.84670129095628	0.859481285986077	0.838792919732363	0.818525985596981	0.828434549263374
Heptanoic_acid,_n-_(1TMS)_255612.95_PRED	1.16438834709151	1.04458459632251	1.05156112651988	0.996682323574788	1.06202130771104	1.01861937133956	1.02768649591261	1.03324963833098	1.01616988632972	1.01843985398829	1.01210536169771	1.01267105404799	1.02088760668243	1.1338984895688	1.00965278178409	1.0336797932851	1.06502077933115	0.98810460038194	1.00623078693557
Hexacosane,_n-_908082.69_PRED	0.690846580996617	0.69964195755337	0.704776713522006	0.696817830240905	0.703905972449437	0.718324566704573	0.684206470362344	0.705147341298555	0.696832616855839	0.73355421357036	0.696536147243623	0.687764383650304	0.692674478985119	0.704687906264466	0.703861837270297	0.711724237565059	0.71238013250511	0.72914347675863	0.720290007547625
Hexadecane,_n-_486353.06_PRED	1.01082524054594	1.03570295728795	1.04667369391555	1.04055386652811	1.02049203873767	1.0080551876922	1.03139225567737	1.02090805451153	1.00345059232043	1.0351636210925	1.0294020343005	1.03862309894667	1.02755054071891	1.02529788296773	1.00703309492195	1.03990105331992	0.994676793224019	1.02025783252614	1.02169635309776
Hexadecanoate (1TMS) [MP-1.1]	1.01081907331734	0.997087714439424	1.01659401763711	0.990265357737967	1.0189872607056	1.03034786610711	1.00399530666205	1.00619411953057	0.977467407550158	0.962534020549269	1.017800004193	0.981099135195792	1.00410277895117	0.97905115086663	0.982769583815812	0.984442123891886	0.966976851115095	1.00094318290638	0.987860318985058
Hexadecenoic_acid_methyl_ester,_9-(Z)-,_n-_652277.12_PRED	0.866904438880487	0.872646767999382	0.876629013129565	0.878261860697988	0.870832660451258	0.878020981672081	0.875251104470159	0.873858204037824	0.872348268758587	0.870922036305997	0.875307546197197	0.872411157124219	0.865071445549153	0.868241400378831	0.875167850007705	0.874605186686352	0.858537312621185	0.871960070690992	0.881700081564382
Hexanedioic_acid,_hydroxy-_(3TMS)_535302_TRUE	0.951418092545265	1.0130842551636	1.01378394912121	0.965710676916462	1.00252221305645	1.02317399107785	0.967359633114503	0.985458777402371	0.978761416623396	0.986825662545784	0.950887223491234	0.99046726628296	0.967242470094934	0.938732943322138	0.958669405732131	0.931413589209526	0.92190453587843	1.00618321319914	0.961866879889244
Hexanoic_acid,_2-ethyl-_(1TMS)_254181.88_PRED	1.27245742579885	1.11843719576389	1.12434140226288	1.06955741038282	1.1350611099481	1.08717251111088	1.10196455960887	1.10522211983765	1.08621594963607	1.09037295390996	1.08272590603823	1.08481495839655	1.0941202785713	1.23066358926198	1.0793371558778	1.10514034772726	1.13690561701315	1.05514140968328	1.07389062033099
Histamine_(3TMS)_653726.19_TRUE	0.724945438448031	0.734480553985661	0.746372874468898	0.739179250548301	0.732848024406527	0.762304700025316	0.755365519791534	0.751478393203978	0.73433624446484	0.733831783765401	0.73742918187384	0.734722344243059	0.728299937766516	0.734046807885109	0.751125720665247	0.742173214168161	0.710388497223652	0.744136481267118	0.754815600056621
Histidine (3TMS) [MP-1.1]	0.829889922871511	0.882238538263785	0.865577005394302	0.862596079610704	0.866722117615507	0.850082633400009	0.835832083561168	0.869404802091511	0.854316868660119	0.851476621162995	0.803932317822096	0.872353059477816	0.88789085389587	0.818821832494646	0.82643387658651	0.805602058341321	0.848491460634289	0.863020838533404	0.843681619983556
Histidine (4TMS) [MP-3.1]	0.775485954365947	0.634144478702621	0.687364708213894	0.754720536319661	0.647982391476948	0.596068919117294	0.782339907183294	0.786507873152388	0.524473582853156	0.679278110698183	0.740145129277805	0.702941793237889	0.773841155909898	0.793274176192671	0.764473246479295	0.787342444276138	0.594610574033499	0.5952832778099	0.792290413412516
Homocysteine_(2TMS)_506276.72_PRED	0.942920083809315	0.957997609433975	0.95860529380341	0.968833605192986	0.954817316400584	0.952373212395681	0.955867413341154	0.953531579067194	0.962352541896073	0.965425400338929	0.951410361682789	0.9600561481504	0.963519326451675	0.96525949125495	0.946567684657422	0.96071374053475	0.954936644461232	0.967662993335267	0.954836039933044
Homoserine_(2TMS)_380616.94_PRED	0.971048085390544	0.925315682329535	0.949810551781829	0.855186047880824	0.981447140599555	0.964714712080482	0.947098180953427	1.01875040615298	0.951015613076957	1.07595829735581	0.98635126885564	0.999196703385418	0.904527192395045	0.925117372688794	1	0.977161894079238	0.974059266487292	1.1095147913519	1.0104951112091
Homoserine_(4TMS)_510930.09_TRUE	1.11540697800992	1.12683101617851	1.12176460377868	1.13664117198142	1.11874369689276	1.11768186812529	1.11897547141056	1.11482023562265	1.13758694158005	1.13549763094348	1.11821389745656	1.12582655126561	1.13857099662332	1.13653819789648	1.10685008348608	1.1292119854209	1.13006163193976	1.13740527225181	1.11912617211281
Homoserine_lactone_(2TMS)_458933.88_PRED	0.947090939774006	0.992429741955354	0.985282940049365	0.995339228121017	1.00365887740409	0.981844792752905	0.991917877429448	0.995218593239774	1.00417521005502	0.997638081071279	0.976873864805576	1.00615388442283	1.00573036536673	1.00281322939099	1.01054485947998	0.993728170527288	1.01156312362813	0.999948695921842	0.989196019945176
Hypotaurine_(3TMS)_509415.53_TRUE	1.21873844328684	1.22929844844027	1.22133546794105	1.23518649115403	1.21838764486448	1.2164422323611	1.21793294881975	1.21193880991066	1.22906613248084	1.22504622427403	1.20840555775622	1.22107004957804	1.2311336085626	1.23182017691515	1.20064406514382	1.22429197873828	1.21684287057269	1.22944102352503	1.21672481134632
Hypoxanthine_(2TMS)_659841.12_TRUE	0.751328624755295	0.821312841629631	0.787585531338693	0.779399803655605	0.806706358726408	0.78658971922724	0.738435964896922	0.765433839648782	0.787392821356345	0.800409219653706	0.766997572740598	0.786357596907002	0.768553508533508	0.77300387651207	0.786221722694513	0.794646519571306	0.80418239132375	0.82208592378135	0.786344838523763
Indole-3-acetaldehyde_(1MEOX)_(1TMS)_BP_657093_PRED	0.769434519915231	0.784215660108043	0.781705965125139	0.792932862309765	0.783831035386388	0.781076593148612	0.779814759776752	0.780738873761383	0.787392821356345	0.782896110062141	0.793700022648729	0.785906026042596	0.78273563950578	0.785457665234557	0.795139082906742	0.785003505104941	0.773025647916501	0.786428683294777	0.789822220069188
Indole-3-acetic_acid,_1H-_(1TMS)_668169.31_PRED	0.718264686344352	0.74507024263948	0.73604621487181	0.722679789603656	0.761429479693049	0.769256021894307	0.755485877322077	0.731878991472483	0.718298348041754	0.726577992238967	0.734179309565888	0.710425776292554	0.704310388757514	0.703869839448701	0.741876950592479	0.711247541611919	0.697123773319348	0.731568873160696	0.733751540524778
Indole-3-butanoic_acid,_1H-_(1TMS)_755498.5_PRED	0.75110361986389	0.755849723584201	0.751000209395456	0.751792782870374	0.756057573894345	0.742071632229401	0.748580790477743	0.758346466143287	0.749927646262002	0.748509418359434	0.753247819514455	0.756945022468778	0.762980076594821	0.759473358770667	0.774087938984485	0.769340385219731	0.762600318023745	0.750751454640562	0.772420030579008
Inosine_(4TMS)_904803.88_TRUE	0.923760593955583	0.937728485864075	0.92378720770243	0.927200397885345	0.92839584615575	0.930900895766492	0.906843900384566	0.926636405528422	0.934913856574733	0.951814337192945	0.919359813590605	0.918211850366658	0.932644810285637	0.933068905700985	0.925457954504115	0.93830388175211	0.942511095811545	0.961772121759691	0.944851405067003
Inositol-2-phosphate,_myo-_(7TMS)_863697.56_PRED	0.721808152065002	0.723881618559555	0.707219834181692	0.718775376209911	0.715694285115147	0.73085761515218	0.725725573894483	0.733453937943574	0.710905337566798	0.686290013255403	0.713947852340561	0.70003978809773	0.703976406894716	0.726847505041232	0.740474260622441	0.707152878274633	0.71503444852756	0.711369158698244	0.725527962312481
Isocitric_acid_(4TMS)_597989.19_TRUE	1.03654025122014	1.03992387985145	1.0315144272707	1.0341992623174	1.01987593309196	1.01450677755202	1.00204922454903	1.00337772709614	1.02847907097559	1.00568286351063	1.01571922632327	1.01113501002981	1.02149509871739	1.01233925579138	0.98701003623466	1.01480546435768	1.01232906809491	1.0150266872846	1.01384594501271
Isoleucine (2TMS) [MP-1.1]	0.766238858540866	0.698261859732481	0.764172720580389	0.747858977475752	0.731595800861549	0.64901143312531	0.77910205818151	0.778947098973139	0.672431198979058	0.760790401284447	0.76026471144353	0.754387376330993	0.775303427231469	0.758094644325942	0.762883972685778	0.774198808146999	0.647258323922937	0.68711109661374	0.773608799790664
Isoleucine_(2TMS)_318827.91_TRUE	0.731676081648799	0.706163582119874	0.716737326135225	0.717337200447941	0.713930923851984	0.740826752820906	0.720262634471784	0.733453937943574	0.723193362442053	0.727541435825115	0.708170499447178	0.722245335718091	0.729351549001677	0.734275712554072	0.731611915885628	0.724744328695403	0.755765049308604	0.731954715944878	0.741290473780862
Isovaleric_acid,_2-oxo-_(1MEOX)_(1TMS)_BP_269296.62_PRED	0.963792118743268	0.898696033365302	0.898284685824549	0.870794908359818	0.900305162656203	0.889656533491272	0.89743269377659	0.897820844997945	0.871719267195558	0.881149495384323	0.887542894528663	0.887849277297277	0.892724927297433	0.933502621988269	0.900276471123967	0.889688478598852	0.893685761510098	0.870269545354876	0.891678617176036
Leucine (2TMS) [MP-1.1]	0.792685340633776	0.796067078301209	0.785499588046008	0.79106790489091	0.807570784743872	0.810117479032232	0.781644743154518	0.806851236785366	0.799783066912765	0.809836642923748	0.791050385161528	0.797930220805222	0.812965588601128	0.799574227314701	0.806346546603628	0.794815214515539	0.831142330369362	0.80673763456479	0.820641275540332
Leucine,_cyclo-_(2TMS)_377176.62_TRUE	0.614855346698245	0.593110373801516	0.637136405455667	0.498438919758541	0.640961433104162	0.630388989512953	0.595580769195502	0.686652394829818	0.60755376435157	0.727319918395103	0.622584365931112	0.656501271054643	0.569850760806813	0.586593815936558	0.660101336156302	0.636608741802527	0.623778395094723	0.755261636964506	0.670554424496389
Levulinic_acid,_5-amino-_(1MEOX)_(3TMS)_MP_574704.06_TRUE	0.89309358870809	0.866436491757492	0.850023739912896	0.908106178686319	0.864066398478454	0.840298084298482	0.895629417785278	0.877495102884371	0.892973999329268	0.891004586999087	0.906591231309883	0.8821700763729	0.902301658811681	0.92476436891658	0.896366884165053	0.918682846418677	0.928581326414534	0.869951911097911	0.896777903103952
Lysine (3TMS) [MP-1.1]	0.912653582377067	0.865427805432239	0.891123315278072	0.905367716362588	0.877083678978016	0.814090193939589	0.908820588365215	0.919528172185587	0.887708292405042	0.885136778915763	0.894981119721538	0.91313512600487	0.921589655013461	0.924858622711129	0.912419030904862	0.932008631121102	0.838146715623914	0.841777022566414	0.953216312931632
Lysine_(3TMS)_631402.94_PRED	0.727614954163901	0.72889338380487	0.711938443298043	0.737489137158952	0.709041399513057	0.713344241187219	0.738293624633744	0.714531953604459	0.726717840040818	0.703312845435451	0.734715455811276	0.706949162212097	0.718027847825984	0.741484199703072	0.709373564221599	0.731545476518404	0.719977079840365	0.710326926894805	0.715406897496849
Lyxonic_acid_(5TMS)_539863.25_TRUE	0.789931796410368	0.854341756529896	0.854376693942127	0.814830818859652	0.849492435560112	0.874059921969348	0.816862898320833	0.835897110547528	0.823329328952969	0.834042831456615	0.79628265688834	0.832632352943556	0.807350075533618	0.786330902936768	0.809366769517012	0.772849057615696	0.77093405045223	0.849109370536294	0.807999767008942
Lyxose_(1MEOX)_(4TMS)_BP_488187.75_TRUE	0.787580093162723	0.821312841629631	0.821371324652075	0.812911679029082	0.805376727851064	0.794216948944904	0.821806163373945	0.803879992290013	0.77448714162052	0.820590212329947	0.811157228915368	0.829140178281021	0.808489806929492	0.808497559020413	0.798062463910946	0.818076983053268	0.773615406717909	0.80243291552918	0.804379021678734
Malate (3TMS) [MP-1.1]	0.89385668902313	0.92671718202362	0.896951438889423	0.91480677815635	0.905312695124231	0.916433243191801	0.90406340179096	0.904385331510983	0.923906211870407	0.921343207706423	0.879612605381458	0.89734240414498	0.898092447323545	0.921774195773373	0.911443052265165	0.924012341312728	0.929775209453155	0.927444894652767	0.929105598924981
Maleamic_acid,_N-ethyl-_(2TMS)_459686.66_TRUE	0.686604574930952	0.734212676368267	0.716641596681135	0.734200115062125	0.747530764402336	0.731075658978144	0.733331562408148	0.741670952878806	0.74914447036172	0.748569309843031	0.723418247426586	0.757185291967432	0.743960395761363	0.746202663218557	0.764686064266552	0.743992022321676	0.753996590264061	0.740306476187427	0.732605607970769
Malic_acid_(3TMS)_442513.44_TRUE	0.789776661196065	0.822811942519566	0.785939698189924	0.809177440916161	0.80406829664875	0.805148384595189	0.801289554982204	0.806271166672265	0.813670220553332	0.821552841143199	0.774251901148529	0.800275916236207	0.796391706279694	0.820177493071036	0.814478068280228	0.819012098137152	0.834611062831293	0.829120603934606	0.829330938914331
Malonic_acid_(2TMS)_300994.53_PRED	0.773749511290912	0.82608025822611	0.763446459172251	0.842943382738825	0.836116553871645	0.841959703604502	0.818559059916808	0.804806342890867	0.811351600086637	0.837124467057392	0.760145672239832	0.77974973812197	0.77247271604544	0.813632721502475	0.780919952521708	0.78015840614931	0.831197886031793	0.840298257661739	0.823421431889156
Mannopyranoside,_1-O-methyl-,_alpha-_(4TMS)_559825.75_TRUE	0.779903576276335	0.773814485879678	0.768309903364323	0.774684917681981	0.781442404452224	0.759164827830709	0.801174485649047	0.814206501951876	0.774877620208953	0.802780071033112	0.806233630918474	0.788232635485477	0.840167099703283	0.798807664118874	0.798697166479334	0.822508667002408	0.760781383844054	0.797169533514476	0.793692522598886
Mannose-1-phosphate_(6TMS)_785522.56_PRED	0.649181024225077	0.654474110039126	0.652888773577512	0.622020387316869	0.67524441873323	0.665705597809843	0.63095314681161	0.674782061204829	0.648299798012614	0.675765452782712	0.655897892293862	0.676885809026731	0.654218964646173	0.645493694674479	0.682986213199921	0.66228005737136	0.621387544987081	0.700747969515558	0.663237890821052
Melibiose_(1MEOX)_(8TMS)_MP_914184.5_PRED	0.573277249168146	0.620947057493	0.550477742871839	0.662826944049742	0.634242320414399	0.615365580555632	0.675873848581569	0.662543166638442	0.633391046413289	0.641097572090208	0.679282037019543	0.643265641925667	0.635232676006141	0.697952049097365	0.694278875902492	0.726980224433839	0.65417389573705	0.662013211115172	0.675245721271064
Methionine (2TMS) [MP-1.1]	0.77296158605812	0.783438597534351	0.768945151904053	0.773967848027231	0.777450200457815	0.805531398323372	0.786013827380815	0.796068273626119	0.819825892907831	0.773855432410912	0.775027029775612	0.798010626665913	0.791402495667036	0.788414619924456	0.769417856445173	0.802874137739911	0.768076393470943	0.790324589695222	0.78827650910127
Mevalonic_acid-1,5-lactone_(1TMS)_454636.47_TRUE	0.944251058443672	0.987113667924472	0.980392009199322	0.989868634900546	0.999646774980397	0.978511513457872	0.982925753517703	0.989674726394616	0.994418870908641	0.995146872422508	0.971046026025567	0.999419549849004	0.999149291539572	0.995631894847597	1.00585759500072	0.988697000573703	1.00646291751125	0.997419169441997	0.981763319640123
myo-Inositol-1-phosphate_(7TMS)_788938.62_PRED	0.688541789565871	0.699267378635857	0.682674971527584	0.657444642518664	0.710793966502757	0.70892257037143	0.6666531484688	0.712540390128929	0.674957629254202	0.715656469032117	0.690121937931738	0.712027160855153	0.687965022195456	0.67236673699217	0.722332986940211	0.697016820636099	0.651103712876523	0.73528857621174	0.685622337302465
Nicotianamine_(4TMS)_902113.62_PRED	0.760364143932319	0.780557767598246	0.763385705069663	0.768236027872405	0.773243215624684	0.774160847322882	0.745575885533976	0.780129445535734	0.775819811044789	0.793901974197252	0.773888151399268	0.766468621016692	0.770268190964074	0.774659110588315	0.77158246252081	0.780837195279613	0.780757435820172	0.801191152012825	0.786526080751362
Nicotinamide (1TMS) [MP-1.1]	0.888353347015068	0.910284891162937	0.888152645639329	0.913735216182588	0.909866443017298	0.893498127100045	0.88322903640312	0.877404845387995	0.889279756753984	0.886350192519181	0.888479534587877	0.896137860680491	0.903983314301343	0.928649939642402	0.916631487927158	0.917853184553434	0.942399872747388	0.912474902516293	0.887477857300598
Nicotinamide (2TMS) [MP-2.1]	0.709344565269138	0.818008741995046	0.799368929499372	0.725681873170545	0.810594443359308	0.826287784574563	0.724591036694619	0.736604641659216	0.73433624446484	0.78096078558468	0.704437720424203	0.775779155295231	0.710981083875035	0.726272092303326	0.757865553481589	0.737774309713929	0.736587715920275	0.822149512524478	0.718453043864078
Nonan-1-ol,_n-_(1TMS)_336924.19_PRED	1.13449066255383	1.15733652782484	1.1451285739634	1.151880886302	1.14273473679289	1.1368444069923	1.13864085883905	1.13774347570877	1.13811652659428	1.13726620628874	1.13598589567308	1.14281385866925	1.14092135533682	1.15064438829142	1.12763086155432	1.14557037604076	1.13175197068117	1.14105923486657	1.13647348882576
Nonanoate ((1TMS)) [MP-1.1]	0.66036952045061	0.734658756763617	0.678596437790867	0.620454701748278	0.721419536082872	0.763681172391335	0.773767407877163	0.719175433458919	0.635349975496337	0.714403939761327	0.674298823097933	0.674886904737463	0.652396573744393	0.638530678259029	0.732617222125734	0.64752060548378	0.681737425709693	NA	0.698854347412601
Norleucine_(2TMS)_337195.69_TRUE	1.28892193277944	1.30891266918782	1.29252621142197	1.30142836877897	1.28936883489914	1.28251029929502	1.28537187353525	1.28587568937289	1.29335855394796	1.28525042520336	1.28384269878999	1.29461262541135	1.29708919636626	1.30321711768993	1.27175809360324	1.29679261218535	1.29116790065898	1.29144110419931	1.283712668848
Octadecadienoic_acid,_9,12-(Z,Z)-_(1TMS)_775215.19_PRED	1.03006878096299	1.01825789449681	1.04065392847131	1.01641960548277	1.02397327987156	1.02454825963323	1.00938705004235	1.0007766319821	0.973646906263594	0.971798403461934	1.02308044525094	1.00174135045299	1	0.98862793707837	0.986183608201426	0.984737485287204	0.969428569707078	1.02204786904899	1.00608377324512
Octadecan-1-ol,_n-_(1TMS)_754094.19_PRED	0.742007237035428	0.740627037063866	0.735808055874061	0.732426285848485	0.740849372050894	0.720363023752447	0.72905516842037	0.740982217104116	0.729262619525078	0.733275877135024	0.730425050769837	0.734722344243059	0.738602036090485	0.730944645367418	0.753392061094912	0.74238473842631	0.750425970124546	0.724112312158696	0.743385384331205
Ornithine (4TMS) [MP-1.1]	0.664769615462132	0.624855040939062	0.64907884600016	0.644727767783945	0.647982391476948	0.637046550489036	0.689174304721172	0.677785633914472	0.625398024092284	0.64863174622223	0.62073570686149	0.652724678956714	0.645359095160413	0.689801559060448	0.669343561918688	0.654585834323343	0.604169783052529	0.617667791358487	0.676585408435522
Ornithine_(3TMS)_(Derivate_not_found)_492548.84_PRED	0.884057047945761	0.906597631524219	0.924562608654181	0.911940221524958	0.896929058280088	0.883018088695388	0.909998950441306	0.897865156082478	0.876272956560445	0.911963993376003	0.903301833661197	0.914412198480349	0.907654217428224	0.901867995273187	0.887916008798264	0.916442452124067	0.881951675610184	0.902230788588535	0.896470411614101
Ornithine_(3TMS)_587245.62_PRED	0.875187937301747	0.779232012129498	0.818887338231497	0.852603074433498	0.778649429932044	0.731075658978144	0.861379157093547	0.891654233658979	0.731999599175267	0.810971549853232	0.850007902517861	0.818508583099164	0.875411222974674	0.879364328740261	0.873938298348512	0.877588455141856	0.752075602898069	0.747695822186003	0.889096257449715
Ornithine_(4TMS)_572079.81_PRED	1.01876550749543	0.988621677838127	0.97512508343531	1.02780576810951	0.987066431076854	0.967397965464881	1.01414390124167	0.998859131500442	1.01677868952679	1.0040474972501	1.02574998998242	1.00314593825884	1.02251156192789	1.04442243556783	1.01223246705653	1.03797812737374	1.05263378362664	0.993621322711747	1.01776707399585
Orotic_acid,_4,5-dihydro-_(3TMS)_616339.19_TRUE	0.687022743376203	0.6969911431285	0.724298381882461	0.707697027066265	0.708252722208194	0.70053897582829	0.732052273824163	0.70767190494447	0.659802549177666	0.715656469032117	0.700135532671713	0.732223631642283	0.727237494293726	0.701585743746775	0.704880045210759	0.710960451639144	0.663735968894879	0.686871611291866	0.726429806543161
Orthophosphate	1.40943801589355	1.42616575618885	1.40447633541846	1.4180788709752	1.39959656834414	1.38970559433678	1.39340922316786	1.3954639454415	1.41819009253268	1.40040554317073	1.39920364915433	1.41237792743453	1.41919539309641	1.42393926167365	1.38140107181082	1.41383847231886	1.42421296766879	1.4101446118618	1.39516821202968
Oxalic_acid_(2TMS)_236929.91_PRED	1.10122213691481	1.14916720184222	1.11832900220837	1.07323111659559	1.12748453025071	1.17520293773224	1.04717225705655	1.06576967164635	1.07220245377861	1.16022377420128	1.06484322633264	1.11169721211104	1.03482897378143	1.06575880674398	1.03347092280754	1.09124899132756	1.08272055347889	1.17226662538199	1.05453784367098
Pantothenic_acid,_D-_(3TMS)_680979.56_PRED	0.675873104744616	0.687493228989788	0.673914795239193	0.681791117345883	0.67565377079811	0.687338072525488	0.670052978187659	0.648968764324077	0.662653815911959	0.671098440269147	0.673049017391582	0.669071851841663	0.667584772575172	0.676878869784576	0.652982856752771	0.670579814762277	0.679530562931682	0.677327111509338	0.631659357865079
Pentadecan-1-ol,_n-_(1TMS)_636157.25_PRED	0.858090868471835	0.854116007207324	0.841321843170445	0.861955549791091	0.834375523753574	0.853122690823	0.852325110198182	0.847149628705854	0.852576459739217	0.83549434197731	0.855491074650368	0.837164573043642	0.85521264080089	0.862872814268788	0.832049098795083	0.860083282551023	0.842063409933417	0.838608586016488	0.841987864169099
Pentadecane,_n-_462471.41_PRED	0.805454554220123	0.847316560095952	0.84588747809854	0.849867635955049	0.860874476094002	0.842080809999021	0.846079646307435	0.853809173338744	0.855444040383476	0.861569821922327	0.83840335458941	0.862389327237192	0.860651137710118	0.857206051485026	0.86843080935127	0.851724955598907	0.861813260887701	0.854640697575575	0.849775537672948
Pentadecanoic_acid_methyl_ester,_n-_620606.38_PRED	0.873767877172638	0.861001914601545	0.863211860416602	0.874845484312914	0.848293792519629	0.857413957851812	0.872870793684079	0.854580681146881	0.866269192796013	0.846750165776942	0.868117552385436	0.854508813163723	0.869579092954326	0.880461883202879	0.844034884891662	0.876022183356702	0.858282512701365	0.849790171639741	0.860509604854316
Phenethylamine_(2TMS)_490740.62_TRUE	1.20550178177195	1.2278539159832	1.23635075055162	1.23163868691897	1.2093416028045	1.19348649727605	1.21938349186222	1.21064937462384	1.19397936700395	1.22177956047105	1.21575241612009	1.22719134203954	1.22207689653959	1.21382056499197	1.1894579668331	1.22788002734618	1.18861220378919	1.20995171831922	1.21077041898906
Phenylalanine (2TMS) [MP-1.1]	0.798269284230148	0.819988078891162	0.807594563300171	0.813650864895077	0.821049592814056	0.815548472255424	0.805605178151	0.806851236785366	0.815750749386296	0.799220671788706	0.772525624135001	0.817052266652471	0.844024516005735	0.813702740914342	0.801518529378301	0.812314394701426	0.805907592787191	0.798980974890474	0.797746190527446
Phenylalanine_(1TMS)_492082.22_PRED	0.968780831718124	0.993018870493219	1.00384148159615	0.996189517450671	0.977865831041198	0.958231075952099	0.990227400290965	0.979464939239106	0.959922368440572	0.995214317176661	0.984877708258543	0.997435891394719	0.987142344894844	0.980679202049161	0.964039557198833	0.997423362210799	0.957788993843495	0.979994933259229	0.979271948355227
Phenylpyruvic_acid_(2TMS)_575884_TRUE	0.911280380804737	0.883011820312418	0.877733489981606	0.917881712646282	0.875248214467298	0.857372350904278	0.907601461439938	0.895444280859235	0.918785499599364	0.900858025937426	0.920815275544367	0.904483103653437	0.919195765674083	0.936340878606078	0.908426117864674	0.931656432628938	0.942612943214786	0.888828463414296	0.914824061144514
Pimelic_acid,_2,6-diamino-_(4TMS)_654293.81_TRUE	0.721409246705989	0.729923328662644	0.724031342594388	0.739680967348904	0.723059225601853	0.736860342094935	0.730295453321637	0.739660622562781	0.738698298360714	0.73656625127894	0.733871671907967	0.735095647043348	0.729351549001677	0.742332880592325	0.747093490567046	0.742806476290984	0.729117416751847	0.741505739789546	0.747051046322545
Pipecolate [MP-1.1]	0.640411932118873	0.633204784761583	0.647589463966391	0.624071914286391	0.656376932984547	0.653957900214722	0.633778386858366	0.655262249935797	0.622508348821456	0.644683679972935	0.64249540470669	0.630367792679291	0.630341280811764	0.618116472577629	0.640643556801403	0.628769949426494	0.640019476188976	0.641394528189692	0.648578898311772
Proline [MP-1.1]	0.891414239350985	0.902633227955238	0.898202885643891	0.890961792200783	0.893920732186483	0.908422128941823	0.891908288260529	0.904951590358621	0.904801292864221	0.88552235227157	0.881879941155094	0.898832061852061	0.903226729064848	0.901690819380085	0.883969674405556	0.906911947476147	0.907708657467853	0.887915738044141	0.913919796367627
Proline, trans-4-Hydroxy- (3TMS) [MP-1.1]	0.644470782395237	0.649550277995008	0.649998866124738	0.639389739071232	0.673312111301427	0.676602907868347	0.670052978187659	0.706028341616063	0.686605631222314	0.671227457957476	0.669783806201836	0.685485759895762	0.696820329999481	0.66764584131434	0.672313820037409	0.666514281938511	0.676766377120214	0.680438832911266	0.69188172323137
Proline,_4-hydroxy-,_trans-_(3TMS)_450628.06_PRED	0.923102813164597	0.871744486490374	0.915913983675678	0.946616526795869	0.878905354693279	0.799369716039649	0.931458809576131	0.933217364547195	0.883156801430114	0.915192141367993	0.917040897604137	0.923552720787956	0.947032509851235	0.957334318011425	0.947832863797588	0.97036118636303	0.839741806388065	0.843955695637655	0.950179794317871
Proline_(2TMS)_340374.03_PRED	1.02463557208291	0.975607793544943	0.983962926021222	1.01670379875265	0.972790159619865	0.965930288968138	0.987696071144541	0.999724858851866	1.00972733369585	1	1.00634737585862	0.970744614088316	0.987799137469132	0.999234591903594	0.98163789180644	1.01296817452421	1.0340457643914	0.971573108861183	1.01006145784722
Proline_[+CO2]_(2TMS)_534232.75_TRUE	0.939240127772272	1	0.995958763683653	0.952271787820034	0.987414415070947	1.00758560560896	0.952231150290529	0.972111382542105	0.966285461530482	0.971247361490999	0.936832686435766	0.973824243283508	0.955322616711292	0.927462994699775	0.944759139389296	0.927240371975443	0.914195017535135	0.988732526880835	0.948990927741434
Psicose_(1MEOX)_(5TMS)_BP_573563.38_TRUE	0.892479047831951	0.867683754971519	0.856461360251846	0.901084421655787	0.867993458469967	0.84816358136887	0.893577235282947	0.879123940979231	0.895561081114876	0.882997251348226	0.902003356909391	0.885049246644153	0.902269049060589	0.921640594305113	0.888875406781746	0.914908067877686	0.92768463886454	0.874063185078912	0.900293464631247
Putrescine_(4TMS)_519185.38_PRED	0.600540757832151	0.759137935474831	0.641206860773895	0.611966421193906	0.771179848407713	0.862997419553314	0.604188264018331	0.567128252531797	0.780405732897773	0.685733262477595	0.625072843128446	NA	0.513552098062425	0.606007079992542	0.622314517200782	0.622582575181336	0.827723285808581	0.835058821518879	0.604580249162253
Pyridine, 2-Hydroxy- (1TMS) [MP-1.1]	0.970476800103329	0.957987197709001	0.93375102672555	0.957132503857922	0.918772665411487	0.952527526100151	0.951987531486358	0.949658213809615	0.941685798929326	0.922117152476234	0.953359833571555	0.90720214179942	0.93361206287238	0.944818250701142	0.929855573515547	0.944564147621381	0.932316422212165	0.909173315556815	0.952853836048621
Pyridine,_3-hydroxy-_(1TMS)_283546.44_PRED	0.675562911324985	0.623049561261943	0.607779993509583	0.670248327312669	0.618123241009902	0.618510024948744	0.699066750393252	0.675046793155196	0.623963314155215	0.604637083413548	0.685898362880556	0.594832223555301	0.66900313224608	0.66691111323949	0.672638399398082	0.67143032316776	0.644494566255834	0.585069175766499	0.694259313774626
Pyroglutamate (2TMS) [MP-1.1]	1.27719648757322	1.28814641354148	1.27885719182247	1.29666789408441	1.27624117187686	1.27564358103926	1.27426040427725	1.26655732359317	1.29539119929261	1.28788722238318	1.27308324588957	1.28216106273074	1.30139166058782	1.29421000786922	1.25841999484999	1.28499776084243	1.29120358093855	1.29431365020612	1.27517433184669
Pyrophosphate [MP-1.1]	0.790086700367123	0.741380870196554	0.756343352279068	0.778600034873555	0.755435945660897	0.759274738960772	0.805605178151	0.838947852598719	0.775543589135319	0.825397873299417	0.820872078319494	0.808030341020114	0.80414927973967	0.818187440631064	0.77884219830287	0.853281332309899	0.748435445698226	0.813531164025208	0.813113470095953
Pyruvate (1MEOX;1TMS) [MP-1.1]	0.74790129883188	0.739782990288876	0.763203226960395	0.792080146585929	0.738300461066426	0.775619760432916	0.757274354268554	0.788864989753027	0.810685061085884	0.78408182917452	0.773731861200123	0.807372614214737	0.763857375313715	0.762118135633297	0.779319935967881	0.755146510642062	0.795442738887866	0.757803241530217	0.764644629823174
Rhamnose (1MEOX;4TMS) [MP-1.1]	0.65539833805146	0.652728246967084	0.765550536564974	0.766058959266412	0.655551276075182	0.60274659679162	0.761838861301875	0.768220605931048	0.754709024711301	0.763252920957191	0.764231642102391	0.761185486554094	0.759198644184331	0.784995047539403	0.762883972685778	0.780692120034113	0.755589585033948	0.751707679588741	0.759051467977366
Rhamnose_(1MEOX)_(4TMS)_MP_517543.41_PRED	0.632727779444821	0.746985702788924	0.769404696824268	0.762838895184466	0.762598733487673	0.820941426731259	0.763297383065287	0.753147472540763	0.817274813821948	0.782040548631058	0.76843534756901	0.776078638764823	0.74568639221099	0.777990522643384	0.74845594796742	0.770041093245085	0.839332566351525	0.839871781674104	0.759701389615081
Ribonic_acid-1,4-lactone_(3TMS)_550463.56_TRUE	0.999175439288614	0.995400750868703	0.968108519236407	0.985792360939187	0.99845853209234	0.956521572593849	1.00075241006883	1.02323619603764	0.999528968682167	1.00682174705465	1.01103868792387	0.99669552316369	0.984678120170975	1.00229622428922	1.00084727224738	1.02014074782771	1.00288038814928	1.00175366341056	0.984546334457949
Ribose_(1MEOX)_(4TMS)_MP_503578.66_TRUE	1.04582489255501	1.05835262299929	1.05524075367177	1.06331888096281	1.05139125106564	1.05364523129487	1.05401297765862	1.04854908872222	1.05668637639817	1.06100347288776	1.0472220112184	1.05203553490961	1.05783872038167	1.06068126653404	1.03975381947738	1.05343813993456	1.04270520336731	1.06386896191671	1.05197422976186
Serine (2TMS)	0.676027854912328	0.573300185726466	0.58289633509535	0.671220457740516	0.589297934963939	0.518570073773293	0.668932282534184	0.688522001760448	0.640808515285244	0.594124726238945	0.664453781674634	0.591531149997724	0.672843659357192	0.698710813104126	0.6914629664198	0.693893416551263	0.647768244937762	0.574441301309806	0.703353584678841
Serine (3TMS) [MP-1.1]	1	1.00407743584211	1	0.997549595218022	0.998648890833408	0.999611868848034	0.993892737567043	0.997010620782848	1.00789805203423	0.991887460129484	0.990523769768164	0.997905789156169	1.01201794198418	1.01444617341628	0.979421809702399	1.0027680016422	0.999874050571413	1.00243862307957	1.00087743752954
Serine (4TMS)	0.728271753667749	0.775150296945023	0.774328539727351	0.778714665321997	0.792212878105068	0.769006913377421	0.775362767671847	0.782361711144805	0.781560166211431	0.789730290021225	0.762500488366958	0.792943672086395	0.785554674749429	0.786969593462689	0.805534672507555	0.781223057433089	0.795640109168999	0.784469427242538	0.772159757968475
Serine,_N-acetyl-_(2TMS)_491357.06_PRED	1.07053576978542	1.09265934036992	1.1036168070214	1.09704232465503	1.076811685155	1.06185183343139	1.08728200599108	1.07718764146375	1.06405518100429	1.09298479870103	1.08496622388597	1.09773164339532	1.08989183125359	1.08511311899588	1.06322049124704	1.09814753053046	1.06425419156609	1.07960755633036	1.07842723712029
Serine,_O-acetyl-_(2TMS)_410213.62_TRUE	0.828935759596537	0.464284298262866	0.459637574831284	0.816237275313273	0.471887776404842	0.511171898085083	0.848397534719588	0.771753243853282	0.679270322633636	0.432126049752535	0.806271550215442	0.463448350076862	0.79788298009052	0.796514235270588	0.80559087867661	0.814387650591596	0.677147778503143	0.444776488498226	0.832925891658845
Serine_(2TMS)_328955.09_PRED	0.946680164026306	0.964641906139396	0.950629405210228	0.962021299193565	0.955153135837134	0.952503176437551	0.949482991774922	0.950171500063024	0.949982387404905	0.954451576088896	0.949086366940835	0.954329004287436	0.953522764657716	0.964902175348537	0.944325903128535	0.960796642349092	0.952262893236296	0.955037726861738	0.94614600946243
Siloxane_596806.25_PRED	0.761999556862204	0.767646478531074	0.757185963306846	0.765799807102634	0.761370664140912	0.75478229829442	0.73303199782797	0.746300148431185	0.763529457341841	0.740339029221856	0.752672765992284	0.74822285220269	0.754661149526735	0.748548819161166	0.729083425491304	0.758989095556641	0.745891044132021	0.752843429572588	0.750396077830499
Siloxane_739483_PRED	0.673365237183013	0.687072174887867	0.653775453465949	0.659991131669505	0.715048162378006	0.729022052996035	0.707408484980324	0.646373125148749	0.595273968490785	0.623269339660661	0.670645715327058	0.653723453821458	0.650541404276202	0.635164891323898	0.690925923572699	0.666662302875297	0.623992975241274	0.656350590071322	0.68968172213507
similar_to_Asparagine_Derivate_505075.09_PRED	1.03942735256305	1.04978942165072	1.04303236148051	1.05703564016725	1.04322282334837	1.04324517865506	1.04130001991624	1.03526844737252	1.05892138212052	1.05638073820149	1.03871185350457	1.04995591781918	1.06236090193591	1.06084294992102	1.03464014761076	1.04979662778537	1.05736475815604	1.05989344227031	1.04118222717724
similar_to_Diethanolamine_(2TMS)_335362.44_PRED	0.696711663926216	0.721282222795347	0.710321645952686	0.71005364756456	0.707358119085902	0.714975021546616	0.703874079446521	0.712082268526695	0.70504514582581	0.714655693474322	0.710035593925351	0.713142583168314	0.716162258467268	0.722493464053841	0.714169153580649	0.724911640893568	0.72381277815845	0.713791050482132	0.691537495353947
Sorbitol, U13C-	1.03973131320985	1.02663463919337	1.02392344898422	1.01468020219445	1.05492946080374	1.03384869050906	1.05651515193544	1.05758651447521	1.0266810363585	1.02912731143105	1.03947226811411	1.02256754442461	1.02983396123279	1.03009940540536	1.03510014047075	1.03967174691073	1.01801956517028	1.03673243189002	1.05095414483649
Spermidine (4TMS) [MP-6.1]	0.663206958670253	0.657320332926994	0.604979668701869	0.656705456652669	0.65131980082467	0.665288841449647	0.664762990677601	0.658890425963673	0.727426147521255	0.680107969783368	0.662768084179753	0.586850040765871	0.730306197011452	0.662542113420748	0.643875951077868	0.668857235170268	0.65417389573705	0.656188714012571	0.671538086273914
Spermidine (5TMS) [MP-1.1]	0.626193153318035	0.601119739898218	0.66010939086233	0.677630410835678	0.577189049454752	0.546448136886997	0.661633448326421	0.682929158414736	0.613318849121176	0.646841383755806	0.648532032719005	0.634850981749573	0.663539366164203	0.619063609666343	0.685483310777193	0.640886185328837	0.536211265295834	0.502353187161264	0.668125257934869
Succinate (2TMS) [MP-1.1]	0.883302368440931	0.873353610632176	0.883896620242257	0.892025396071991	0.856356680467072	0.87715216435661	0.893747266953501	0.891905083907157	0.900235232135995	0.886350192519181	0.869657778998219	0.891557767902366	0.899760046240812	0.894766967055937	0.884930274242211	0.899119073468305	0.8739876087869	0.853525491286952	0.918871027245617
Succinic_acid_(2TMS)_365265.25_TRUE	1.1120113540518	1.09974063959757	1.10776088707112	1.11551314414755	1.07839451746646	1.10339280873636	1.11607587862578	1.11164838250275	1.12831238983512	1.10820039990245	1.09362783672666	1.11379571101666	1.12653299009659	1.11826202304357	1.09896072952936	1.11868472960992	1.09927404167059	1.07300052669574	1.14085996465253
Tartaric_acid_(4TMS)_511834.44_TRUE	1.0474372251676	1.05773555975587	1.05987476089227	1.06957829909109	1.05409568851178	1.04861342981716	1.05853034302367	1.04857256338148	1.06684093529017	1.06648036610083	1.05412738029024	1.05954751162384	1.06821848585627	1.07044588369766	1.04618769939743	1.06301436920008	1.05633602752732	1.06732899817474	1.05456723923834
Threonine (3TMS) [MP-1.1]	0.923831841622696	0.931512508335556	0.932738549949182	0.931036604770937	0.92810880981522	0.922695852962824	0.909933111051787	0.922306051953722	0.922719346552585	0.921213637361321	0.917781569299962	0.920059820702799	0.936437144505882	0.939133052230014	0.902564733819394	0.928464859918836	0.925264944041355	0.921207086806365	0.925891577310479
Threonine,_O-methyl-,_L-_(2TMS)_334293.72_PRED	0.64084672236998	0.643530571242932	0.651634426826323	0.652543125700524	0.641343239916897	0.635376045114729	0.636720793668121	0.637400259006312	0.654211573848551	0.654582910847552	0.651335244699476	0.643997237315445	0.648842735003058	0.671806003225465	0.649494886024195	0.66798491859475	0.662570564323637	0.664133069740779	0.642813476668399
Tridecan-1-ol,_n-_(1TMS)_547762.06_PRED	0.932714417240888	0.931310886580085	0.9041486080114	0.923060187387497	0.935845093646733	0.89060450236684	0.939450799993363	0.961716428140194	0.938708127204782	0.949612973767716	0.949301537103298	0.936972851434783	0.925046746708782	0.941800999815444	0.942895869445399	0.954357764381929	0.939740858282398	0.937935514230032	0.923001130005585
Tridecane,_n-_342778.75_PRED	1.1224380023577	1.07982768480847	1.08516166706495	1.11698345647347	1.06994812840221	1.07021975859298	1.08825846368839	1.10130847632627	1.11104488859831	1.09554794798658	1.10127063566874	1.07093371247581	1.08250300064925	1.0940110799037	1.07677616148323	1.10927965973377	1.12988082211671	1.06860777877239	1.10883378880295
Triethanolamine_(3TMS)_493189.91_PRED	0.98830585247993	1.01132795982942	1.02307238356903	1.01635569996607	0.995184826932407	0.978643216523877	1.00984673809545	0.997427396497784	0.983788182897302	1.01579804863382	1.00319864589012	1.0172477568246	1.01132347670935	1.0069419355735	0.985817595616815	1.01825635809452	0.979862045744622	0.999848711327504	0.999007995002399
Tropine_(1TMS)_336960.03_PRED	0.998462435392386	1.01931445582453	1.01096591590309	1.01369516686048	1.00588420794048	1.00038813115197	1.00133855995606	1.00351884844892	1.00945328777674	1.00794333890545	1.00371559448293	1.01302226070921	1.01247273251927	1.01912469411182	0.999030620902471	1.01445827816274	1.00037784828576	1.00838916022798	1
Tropinone_(1MEOX)_343648.91_PRED	1.0115687865425	0.969610159908012	0.974043207797627	1.00641655686161	0.960263872929841	0.957677303201431	0.975564645786886	0.992192932079039	0.997866394409065	0.990684970273997	0.992471271158431	0.9618099837322	0.972854408872138	0.988735053187947	0.970548329933795	1.00509222333503	1.02866237369213	0.957761603241537	0.99411074643529
Tryptophan (3TMS) [MP-1.1]	0.709119884709361	0.7570770681925	0.726671014129441	0.754359049091686	0.764670238484296	0.729686702426448	0.760702513151033	0.773975343507047	0.74011223059178	0.744038358736382	0.699382554667838	0.782874378285488	0.776359050878537	0.749538034875304	0.750145314065345	0.751218188415275	0.780803096294441	0.76423025409062	0.742273458094872
Tyrosine (3TMS) [MP-1.1]	0.854433828188058	0.850815552579022	0.846213718250417	0.855459999967252	0.864816987078981	0.85772546515936	0.867995926898677	0.875490687479112	0.881230788737503	0.839314578927084	0.849958478067242	0.876880705888016	0.896207378972357	0.874177098515084	0.842828440551345	0.879094154768734	0.843426353462926	0.849450339641654	0.866011310088878
Tyrosine_(3TMS)_659029.31_TRUE	1.22652985566872	1.23014132031332	1.22581252312023	1.234708422137	1.2222516686112	1.22674023936651	1.22197432574642	1.22265952818193	1.23315017425662	1.21278720121335	1.22879573895591	1.22634781174706	1.22515887698373	1.22371261757526	1.21874179886708	1.22789999594541	1.21341127961046	1.22787459828728	1.23309140697175
Uracil (2TMS) [MP-1.1]	0.579332246348134	0.671963025500935	0.689382256431053	0.620454701748278	0.692788839709182	0.700931074376891	0.617868476734291	0.62390787122765	0.635349975496337	0.672253698976413	0.592127463597294	0.662753184611599	0.639694829011699	0.585617221988412	0.658369254303425	0.631936503876084	0.617349392978766	0.655538625954112	0.638264823676218
Urea (2TMS) [MP-1.1]	1.18240099173561	1.14059912494248	1.14488695564099	1.17840653190984	1.13050498682134	1.1270210043263	1.14649837944836	1.15870334633152	1.1737988569234	1.15584464885636	1.16232127680477	1.1302368750292	1.1433249581899	1.15404352183107	1.13335100414042	1.17007332432083	1.18307134716757	1.12930694125501	1.16983341456603
Uridine_(4TMS)_863220.75_TRUE	0.688129701576725	0.729923328662644	0.7170239806071	0.699308481398132	0.683891620817921	0.714975021546616	0.673612230566569	0.682192510180476	0.662156349140428	0.711937353676367	0.654567116135517	0.694864111571964	0.636955382303076	0.688257966218988	0.67001138498338	0.662125537405395	0.705423420872457	0.700012977454416	0.703046046810114
Uridine_5'-monophosphate_(5TMS)_995880.69_TRUE	0.798792545533812	0.781413379955852	0.762653840410599	0.752753385438949	0.740416909004761	0.772968768461352	0.709886821895862	0.768695269882106	0.700563642690814	0.750231988668852	0.718614061815865	0.797849751432787	0.777403980207221	0.731416023982812	0.758862795630213	0.682141103929422	0.795837095983248	0.731723385635417	0.735707812268956
Valeric_acid,_3-hydroxy-3-methyl-_(1TMS)_235895.11_PRED	0.866978320659933	0.913367482134929	0.886716866804524	0.835722988190103	0.895356779639719	0.941674546977517	0.813315180020869	0.837407162887211	0.828221611981145	0.931847658591342	0.832360087479291	0.879152815050477	0.801063709306308	0.83349229347874	0.808361153959084	0.856715988911622	0.84823356249653	0.939243319428979	0.826648319503355
Viburnitol_(5TMS)_635711.5_PRED	0.850152463555567	0.837686693207452	0.850363202119661	0.858453307125769	0.840166907470582	0.80773150205945	0.85977414585388	0.855592873493548	0.842107486132144	0.866577474726228	0.841026564595313	0.869345266342505	0.863634769016401	0.870131141951735	0.865150971422395	0.856047493665001	0.840656601298318	0.848030264872512	0.860004417845787
Xylitol (5TMS) [MP-1.1]	0.717229670632237	0.773630994095032	0.742201681026251	0.753923596983113	0.760780638216518	0.787963618056908	0.726047416256234	0.742150306465176	0.752242085128703	0.77570213805691	0.74467893880952	0.709567682326536	0.717344444954024	0.742614213062134	0.750685742121004	0.740966224722561	0.751589614758948	0.769851919681595	0.761047073831273
Xylose (1MEOX;4TMS) [MP-1.1]	0.718675823254218	0.731861724686458	0.722051559514028	0.722679789603656	0.71317925014841	0.743301363833845	0.709509448173677	0.723040545728141	0.717037383298607	0.742778000954414	0.725026715711578	0.724088505110933	0.704310388757514	0.731102013615707	0.726863381417317	0.738873714434903	0.713715976353439	0.730167615605849	0.702014168302803
Xylose (1MEOX;4TMS) [MP-1.2]	0.6990919725207	0.620147537067212	0.618773043443879	0.712683032962249	0.6340378494683	0.645517539902945	0.698225363162568	0.660580906530706	0.670762815729389	0.685509698506464	0.694969962389253	0.662297370785383	0.669782762880385	0.747616819178681	0.706502977098644	0.738215493764157	0.720640297782648	0.643434469894995	0.69290748765412

## Sheet: HR
Table includes multiple worksheets – one for each tissue
hum - humanized mice
wt - wild type
number - animal ID
Metabolites	hum_101_3._hea	hum_102_3._hea	hum_103_3._hea	hum_104_3._hea	hum_105_3._hea	hum_106_3._hea	hum_120_3._hea	hum_121_3._hea	hum_141_3._hea	hum_153_3._hea	hum_98_3._hea	Wt_132_3._hea	Wt_133_3._hea	Wt_134_3._hea	Wt_135_3._hea	Wt_142_3._hea	Wt_147_3._hea	Wt_148_3._hea	Wt_152_3._hea	Wt_91_3._hea	Wt_wt3_3._hea
2-Piperidinecarboxylic_acid_(1MEOX)_(2TMS)_549118.94_TRUE	0.884528592590954	0.883578739729281	0.890429221559367	0.896938044135046	0.880137325724871	0.903937017740123	0.86025249273755	0.88798747109148	0.875152301787175	0.886575932638367	0.922744574237028	0.886411947706386	0.874543882788596	0.88784125041205	0.881359856462284	0.838498619140025	0.88212897405303	0.852988157208984	0.879043665734583	0.916666852384287	0.871103610075923
2-Piperidinecarboxylic_acid_(2TMS)_375026.84_TRUE	0.883114715623909	0.95417682831379	0.931519519796691	0.922266807967322	0.963945145165475	0.948662215976087	0.935740488247085	0.948009096026311	0.935990992528246	0.956888636068578	0.948628593308773	0.941844748389768	0.910081942166781	0.926077795878713	0.958130150753301	0.958287152189418	0.970749509487013	0.95661679015487	0.943968814747341	0.965031313777972	0.915024694220925
Aconitic_acid,_trans-_(3TMS)_600462.25_PRED	0.935903508993778	0.930999455107321	0.956110473652243	0.943939850664546	0.917669874410091	0.945022184353977	0.892940034057591	0.897502421566009	0.896873428032767	0.937571895193216	0.882731886020335	0.886347338220627	0.862463316833185	0.903917632326489	0.921221384483442	0.890512752806312	0.930136190265307	0.915277182235844	0.898969208143747	0.890931197643805	0.923549859307012
Adenine (2TMS) [MP-1.1]	0.77452248263021	0.753762569073561	0.756064222512479	0.758523289044059	0.757207251100139	0.793177610304633	0.778947164277151	0.758635208799053	0.762075600595391	0.816019698838721	0.832572070501717	0.798101725434469	0.756209995332091	0.772156128738576	0.760045533597769	0.748527089604105	0.782924213379894	0.746309400952512	0.774898342726033	0.813585401165157	0.786354835306716
Adenine_(1TMS)_586048_PRED	1.00065386376005	0.99982351067457	1.02743769177477	1.01729696949124	1.03798621096555	1.01598091266575	1.06245083900462	1.02858146090398	1.03030762768989	1.01882236675017	1.0602015971756	1.03855561817492	1.02417171291559	1.02069535527931	1.00898417536372	1.03191075941928	1.02991935706685	1.00767117461887	1.03013077804394	1.04037069619837	1.02147078303832
Adenosine 5-P (|ADP|ATP) (5TMS) [MP-1.1]	1.16460197422721	1.12549262557289	1.15572417088707	1.16184954408328	1.14126723385118	1.1800039479565	1.13562568111163	1.16419586465204	1.13029335906208	1.16823315826461	1.1733026593404	1.15056445439514	1.1188790041219	1.20295134014033	1.16691091411462	1.10808176624324	1.13200756573257	1.18661815731077	1.14349663921584	1.19734289227118	1.14176951288842
Adipic_acid,_2-amino-_(3TMS)_553368.06_TRUE	0.866928223398959	0.857122230111531	0.878117804916965	0.879981663448726	0.878421552350468	0.883927261930454	0.868974402161094	0.875817916178834	0.878928085273056	0.868510773548898	0.908486462523255	0.891043161662892	0.868060323245262	0.873973942721398	0.864266801058727	0.842757135577851	0.870636828956963	0.845225519677424	0.869043116463869	0.894035626538869	0.853816981536177
Adipo-2,6-lactam_(2TMS)_492238.44_PRED	0.711133806727061	0.710789032000114	0.67999432273292	0.717513673517482	0.679093478214162	0.727707963182702	0.712458223219902	0.71131046315411	0.658919444813542	0.716755267905913	0.59633612430325	0.722410992934278	0.668537160056879	0.731480057198586	0.703858033354289	0.619008261510901	0.699879294301588	0.697180694646455	0.694612565890255	0.552714269154823	0.709784518087975
Agmatine_[-NH3]_(3TMS)_578698.75_PRED	0.804151946037749	0.808627228751566	0.81937822371618	0.798917955371169	0.800021017029524	0.84543012165847	0.796687903249101	0.825730464722881	0.781770126422032	0.842945156969298	0.858924961583358	0.812681496172206	0.776260995903446	0.838116052652133	0.821687947846456	0.766211466185444	0.828917411394388	0.818230971099428	0.803155945118419	0.8604484658109	0.80761763958479
Alanine (2TMS) [MP-1.1]	1.24000044212786	1.20117202430464	1.24195131668201	1.21849132106873	1.21473613413392	1.24168994475513	1.22417768152845	1.23658831570282	1.22778248911893	1.26722271708488	1.23581199686136	1.22253421813264	1.22673537150416	1.22660614086425	1.25544913801632	1.21845119239089	1.24389898527232	1.23642673337369	1.22940451499585	1.24109171860837	1.28307692326675
Alanine, beta- (2TMS) [MP-2.1]	0.820410146047719	0.786781188082982	0.792014819985651	0.78147936282678	0.827698731940678	0.812068121742264	0.805466045335167	0.833892970528116	0.84228721227689	0.826312760751638	0.830895605376552	0.829416220982633	0.817473251333137	0.824877079690875	0.801682477616177	0.792715301680536	0.817316518070816	0.7886560791376	0.800443235912582	0.820939868683637	0.790276972693788
Alanine_(3TMS)_355868.03_PRED	0.936383062123299	0.908465336377188	0.907147545229178	0.890982193948016	0.897910455395874	0.955161987894484	0.90291410018982	0.93124864940828	0.922024550886079	0.878753202481534	0.971582391144652	0.909899193117523	0.874836761917455	0.915458143838717	0.892191620883904	0.891617406748457	0.896832849310779	0.889962214304128	0.881446424736279	0.974590827291599	0.944537712809903
Allantoate	0.732952667624706	0.68336536084877	0.725419712072619	0.714261001780767	0.714618815588062	0.733433901581565	0.70543881410086	0.67829780223099	0.690286710079661	0.726010169576284	0.651142739115309	0.704958198921562	0.708265710468166	0.680927991350903	0.708406478893593	0.727721197256778	0.709719577273333	0.650727011221388	0.655459309217389	0.550159290589294	0.712618275179433
Allose_(1MEOX)_(5TMS)_BP_588062.44_PRED	1.09675826154058	1.14242765145914	1.16300135380989	1.09204855645403	1.07620912377808	1.04015877246803	1.10169383391094	1.07764578629063	1.19235596498668	1.0507487345257	1.15467814994166	1.09672228597852	1.16884170242135	1.05387942855343	1.14149725100612	1.24293883004262	1.16468315435655	1.17805261202723	1.1344942661034	1.13972768293834	1.18988936162935
Allose_(1MEOX)_(5TMS)_MP_577900.56_PRED	0.643023110912638	0.553599856762508	0.591610951657472	0.575798175400835	0.551046295399373	0.6095920592873	0.685827685425529	0.677189948816153	0.61622321545319	0.68699304020656	0.730091872064321	0.722209025326005	0.757863795852447	0.643893782632707	0.579957099390009	0.738827343585755	0.658642777992449	0.747217415996604	0.715685681081668	0.697223449044118	0.65736716545738
Arabinonic_acid_(5TMS)_546660.38_TRUE	0.758361744375955	0.743503760218315	0.731055421634164	0.735977975190423	0.709788954284822	0.763955785370625	0.700719844045335	0.746920249978915	0.715488260920495	0.734421950332774	0.758116135888069	0.728350109861666	0.699114445730925	0.750918713329655	0.744751719308815	0.656253358240049	0.72230517537622	0.700423323278265	0.722234851124631	0.766504005375136	0.722698921874301
Arabitol_(5TMS)_503104.56_PRED	0.774914295552577	0.798892808889591	0.775108319065841	0.772474509508592	0.7789228235257	0.813046396723601	0.758556353855659	0.800455953702247	0.769395139820828	0.82401514018461	0.752835363514515	0.790940406348929	0.772404784946976	0.81851166917448	0.797231355043465	0.750451648822795	0.802645660662604	0.803424551759	0.790797585274289	0.785133749932576	0.79732881985573
Arginine [MP-1.1]	1.29103491412919	1.29846444592616	1.286248159348	1.30055534643352	1.25405451167079	1.31671763587114	1.2701704999964	1.27520526649218	1.23590227579986	1.29996942086908	1.08739163400558	1.27774130341066	1.23491868587229	1.28290800247353	1.29698671710079	1.20440544556462	1.27608413434287	1.27617058281648	1.27135888700784	1.06725053174046	1.29562516673859
Arginine_[-NH3]_(3TMS)_606298.12_TRUE	0.720933922794123	0.722965447400908	0.710098725472795	0.724292190572425	0.693970642443022	0.757473516655289	0.692495745690168	0.687149049763813	0.727198890680933	0.751286295612048	0.681645891708973	0.712221536882709	0.642945244004208	0.726180462495441	0.709623207613793	0.69114128334494	0.685140823300071	NA	0.711719043450658	0.678402480647367	0.724778210771935
Ascorbate, 1-Dehydro- (dimer;2MEOX) [MP-1.1]	0.629412948185388	0.827344540537578	0.778768832749925	0.812687851087678	0.811513865034959	0.808107676461665	0.804774080516066	0.84372110547088	0.72561776662947	0.773330549930858	0.571557524375758	0.830894932282508	0.748892993974721	0.836197020075607	0.831813835771345	0.720152874085902	0.778318717488214	0.776611405510649	0.803476646563098	0.517346023299561	0.794788086775119
Asparagine (3TMS) [MP-1.1]	1.37514165957635	1.36706116544388	1.3986760644629	1.39783022339587	1.3941344407403	1.39483990120523	1.3690516250857	1.35860606803203	1.38734749100277	1.36528130528794	1.3904358899872	1.38285642246384	1.37147006594395	1.3585865316788	1.36407909076036	1.36887497586366	1.38766025563979	1.34181657926128	1.36359986759386	1.36958989984743	1.36635532958585
Asparagine (4TMS) [NN-5.1]	0.89555736004517	0.88912800487212	0.893311829909222	0.897069096368101	0.98856856495442	0.933235569229177	0.884494452645877	0.833520128201472	0.861004578864737	0.930560647250823	1.00550351443099	0.856441434798932	0.845322497568474	0.83097643752977	0.890620617213424	0.83243407842754	0.951351449376848	0.833771610108735	0.823259322012374	0.960996753091613	0.90726790495127
Asparagine (-H2O;2TMS) [NN-3.1]	0.796577448423592	0.873778682376655	0.802371977182605	0.894930306938571	0.783188982684033	NA	0.821098927686999	0.899260306004716	0.789821693560479	0.894571332315866	0.913883855293695	0.897741578108019	0.854602844430938	0.864143932792086	NA	0.716872348780907	0.871079830568312	0.872742251727374	NA	0.913941679978967	0.886075782943635
Asparagine_(3TMS)_550488.31_TRUE	1.31411373063795	1.30853542502274	1.32518790336771	1.31622881200634	1.28573178922746	1.33372800892368	1.25293586658232	1.29474669183853	1.2826332134185	1.29979314069978	1.31361732632293	1.275249358861	1.26752079023989	1.29454648450625	1.31052147515527	1.24999316411161	1.29668878710729	1.27537596505227	1.28437886714131	1.31029216310557	1.29541685805106
Aspartate (3TMS) [MP-1.1]	1.05599334822064	1.04743239586585	1.07669162737286	1.06145567753332	1.09584131656629	1.0790603708363	1.12418749708975	1.12344788630279	1.12131783841105	1.09655416304946	1.08239873711523	1.07155484568395	1.15548654782214	1.0392939586604	1.13082038178557	1.10642543040969	1.10258681410092	1.06086216182696	1.0779312980232	1.0771074136445	1.14221423771879
Aspartic_acid_(2TMS)_458076.97_TRUE	0.926845018212498	0.91833834107569	0.940606073038645	0.917658387723602	0.955018311955768	0.947290370840135	0.988144932928107	0.980921971890079	0.984944543772876	0.963525165817103	0.946206514676721	0.938214402134665	1.02240727545799	0.910043919243774	0.988553122749538	0.971298470705015	0.965982218447651	0.922568018171244	0.936010003806149	0.945143791522095	1
Aspartic_acid_(3TMS)_458039.69_TRUE	1.05072366739375	1.04619374472852	1.07331405143306	1.0610192148437	1.09477101459406	1.07790781078485	1.12271096140206	1.12000601327449	1.12051268276398	1.09506986185613	1.07908743877461	1.07236387909044	1.15604201483453	1.03888827252918	1.13169328908372	1.10241097439924	1.10152324569959	1.05598262749726	1.07661666509504	1.07451883009919	1.14237112289474
Aspartic_acid_(4TMS)_550990.62_TRUE	1.22137259976707	1.21362386039554	1.23611136906286	1.22965688818693	1.20907085461466	1.24223419515507	1.1799934983508	1.21096560841592	1.20486175284961	1.21230411437116	1.23171353723844	1.20113825585773	1.19060291717986	1.20990986608922	1.21709415154299	1.17060673947873	1.21282059507265	1.18793089483527	1.20211907757143	1.22288062630253	1.2053076738862
Benzoate (1TMS) [MP-1.1]	0.691642457429192	0.666589285710671	0.694220507527337	0.690501505897214	0.740634730912505	0.707294303433018	0.768416623715834	0.700001782528953	0.735567349663081	0.656095304044478	0.789870290507075	0.734014153053525	0.72147133421453	0.716644901583309	0.675278017589435	0.679446928526926	0.703518441481906	0.691926247404229	0.726579908615937	0.773641990923855	0.680968330701792
Benzoic_acid,_4-amino-_(2TMS)_650574.94_TRUE	0.758742417911029	0.796537031030717	0.774095116982399	0.776291454581926	0.761566441863193	0.816400337435313	0.77881889412307	0.804499413853646	0.791378011885306	0.799021120605781	0.822882177526715	0.786169868764627	0.851422473476443	0.825369180330053	0.799758502465857	0.82228100455168	0.774418389418615	0.781110142911906	0.807829032426432	0.806655309511549	0.814980791545366
Butane,_1,2,4-trihydroxy-_(3TMS)_345095_TRUE	1.22448053436822	1.16670497418302	1.2209674976208	1.18996783343901	1.17171770540338	1.23094746431841	1.17748693786886	1.18081946677344	1.19523431145205	1.20839521707625	1.24856960646879	1.149190720034	1.17224020026335	1.16902725845999	1.16130103585391	1.24098257372743	1.17969942269355	1.2015314912414	1.1803349241211	1.24937530432039	1.17415245535572
Butanoate, 4-Amino- (2TMS) [MP-2.1]	1.13977029980363	1.0872560893502	1.13592329823471	1.11207414340936	1.10058376766607	1.15316008377134	1.10164180802823	1.10403545020435	1.1171819243565	1.12947265696834	1.17009112873511	1.07658235604482	1.09571177031682	1.09298730278385	1.08336829304446	1.15777346993451	1.10136292537827	1.11908805523102	1.10523497336125	1.17274629473593	1.09479908694093
Butanoate, 4-Amino- (3TMS) [MP-1.1]	0.668782918614706	0.670516139598389	0.655184527106	0.6628573626861	0.599220552506253	0.631668879792974	0.669491521542178	0.610704082408518	0.625501300940672	0.743865179336627	0.766585309293262	0.685349082193425	0.665993082843234	0.735004681646508	0.589802572057392	0.67025252746713	0.660773325968772	0.698152076937014	0.763952969168291	0.804012964025407	0.659196030679854
Butanoic_acid,_2-amino-_(2TMS)_249223.84_TRUE	0.713027471257753	0.678769194889303	0.675586493774955	0.690807168722953	0.725017247554864	0.731238729262895	0.724375667360409	0.664117767015817	0.683990667454417	0.732338127190359	0.684814361034437	0.671880355772878	0.65252442104078	0.704792385111336	0.709403040082574	0.691292852785631	0.724421122905182	0.698874695108982	0.699490220798415	0.715481146646612	0.666022059453829
Butanoic_acid,_2-oxo-_(1MEOX)_(1TMS)_MP_252911.77_PRED	1.23197604015067	1.17198268708923	1.16042995601928	1.21753720099373	1.28531631992146	1.21388840975982	1.24470300411217	1.28762945751407	1.3050598788179	1.25339582584977	1.05809279420293	1.24537505738793	1.23903753076249	1.26083720797877	1.21254867038999	1.21731705600713	1.23532388073284	1.17655250043921	1.22582771113212	0.997390349354625	1.20418811984174
Butanoic_acid,_3-hydroxy-_(2TMS)_249401.72_PRED	0.840078970833611	0.811191640771244	0.815238495023459	0.826159395177692	0.888404994893149	0.874673616939041	0.876968529258838	0.79681659883018	0.822082821327756	0.876827568008932	0.866251483730347	0.829827917481451	0.767056555611596	0.870116707998391	0.868363156877297	0.804541439376254	0.881894583296713	0.870377015712757	0.853397474195536	0.859698905519253	0.763462656048232
Butanoic_acid,_4-amino-_(2TMS)_342578.41_TRUE	0.983909765424198	0.931514941239405	0.969162339642847	0.950284947631393	0.938338290518564	0.991697668121201	0.948981506505428	0.947105591839857	0.959527739696156	0.973731761576912	1.01739571838598	0.932222726060172	0.939073145894453	0.941653170966856	0.92735196218158	0.993331198319557	0.943234629648359	0.963124394900054	0.948511598137253	1.0172572429541	0.937844572169915
Butyrate, 2-Amino- [MP-1.1]	0.713027471257753	0.678769194889303	0.675586493774955	0.690807168722953	0.725017247554864	0.731238729262895	0.724375667360409	0.664117767015817	0.683990667454417	0.732338127190359	0.684814361034437	0.671880355772878	0.628509139037483	0.704792385111336	0.709403040082574	0.691292852785631	0.724421122905182	0.698874695108982	0.699490220798415	0.715481146646612	0.666022059453829
Butyric_acid,_2,4-diamino-,_DL-_(3TMS)_438050.91_PRED	0.697375288690065	0.750534764520531	0.718031696477771	0.727902794586508	0.765206443967643	0.682239919375382	0.740058002986217	0.743247157822302	0.720723651111613	0.718272480215037	0.750845209893366	0.746483739153792	0.725541125032515	0.716644901583309	0.736849036839422	0.724337784081704	0.7548609262981	0.75156983155522	0.752743208768197	0.759482973320379	0.708654654962827
Butyric_acid,_3-amino-,_DL-_(2TMS)_281258.31_PRED	0.999346136239953	0.989698331297766	1.02575955318872	1.03481591672414	1.04754526064539	1.03379802772647	1.14033286917025	1.05643200246744	1.11292940192807	0.790509955788106	0.791569490774308	1.11684749317737	1.09593631028024	1.08831137569265	0.988763753767391	1.11558720905263	0.755174214759023	1.03935394184807	1.09631642030478	1.10257905789086	0.781587251075704
Butyro-1,4-lactam_(1TMS)_241244.02_PRED	0.989757976264369	0.962466622078091	0.903493686993602	0.928646316259406	0.850808174558034	0.998212298249857	0.927689620416749	0.896125984153074	0.95226591929979	1.0069644207507	0.715289259465688	0.894496428886712	0.844999538806607	0.906441802264897	0.925794365491903	0.888857387853069	0.976749465330886	0.911151107782734	0.854220419944278	0.68303946835494	0.946859400327566
Caffeine_754467.62_TRUE	0.744089353074929	0.732136519928822	0.723431785364675	0.726276831312061	0.74992058248934	0.77545181887869	0.740622225390187	0.760831791970478	0.722380943123486	0.745423337419763	0.689504481003218	0.753563214111169	0.73570092229185	0.753827988120908	0.740753182533092	0.69114128334494	0.726598021507588	0.729070144453057	0.746449373486093	0.690000355677684	0.711763836421662
Calystegine_A3_(1MEOX)_(3TMS)_BP_588253.69_PRED	0.798366350854319	0.839742571788031	0.856487234624869	0.789899159350374	0.793953435958486	0.748047428139674	0.815372073501929	0.790272641800174	0.900057544183634	0.754382381509168	0.867839333087331	0.812735725137186	0.878684971758988	0.776697070283364	0.843377387959441	0.935842630017215	0.862043448481726	0.87948873114713	0.847257234275361	0.850866199450645	0.887271694936235
Calystegine_A3_(1MEOX)_(3TMS)_MP_554707.88_PRED	0.739720313429594	0.725490216783579	0.735853377750155	0.749177137651481	0.734744845770264	0.763672875031113	0.724595806105321	0.749006741286484	0.736845511459348	0.743865179336627	0.762410573364098	0.752674370421099	0.733498817108454	0.74299891000195	0.728020236772011	0.692047466688008	0.732192156825245	0.698874695108982	0.738125109622046	0.758934880501058	0.734404710415122
Calystegine_B4_(1MEOX)_(3TMS)_598843.25_PRED	0.887591781872268	0.915878840968466	0.930718888200904	0.889796579129675	0.873786857682692	0.880117570442562	0.893858921100673	0.880757048351459	0.949268605401983	0.882541976750534	0.931325648410598	0.883368935018794	0.935548217399681	0.86675457228239	0.924296919281246	0.981649621861096	0.930993328374753	0.939951524113298	0.916096366200227	0.91621383512519	0.945577363579356
Caproic_acid,_6-amino-_(3TMS)_546902.25_TRUE	1.38541719841614	1.37952829694915	1.40167914922468	1.39232634217965	1.36399336087991	1.40592235716322	1.32833312502851	1.36728742281625	1.36045978798041	1.37340419101424	1.38779584508665	1.34871827056729	1.34389931581993	1.36590044007386	1.38224350916582	1.32958987349152	1.37407045384904	1.34908191620747	1.35780814587099	1.38069257273323	1.3698351232091
Cellobiitol_(9TMS)_870156.12_PRED	0.607900438322517	0.594867074565126	0.612851910790783	0.569283369255787	0.628744931814122	0.622575282533011	0.674435504842189	0.567509372166122	0.571525915604196	0.658085267663272	0.646358311140058	0.572465040976644	0.634421871083423	0.629580084149294	0.595883927191554	0.658753029363819	0.689169877576289	0.700541497138363	0.745760248037941	0.724671064761151	0.769311650652493
Cholesterol, D6-	0.902924014152876	0.88246100562547	0.907691864125157	0.917873893914488	0.943289223545143	0.923014888265092	0.961752371359489	0.914910906740836	0.92610095703979	0.901290145858743	0.927331437128199	0.934748728359439	0.916309387553946	NA	0.895060924955452	0.918420065611165	0.915719045270927	NA	0.911616868628154	0.921609143200888	0.893453083354065
Cinnamic_acid,_3-hydroxy-,_cis-_(2TMS)_599148.38_TRUE	0.979086924354208	0.972207599203865	1	0.992330224017318	0.958296376653313	0.992181234353108	0.918747069129206	0.932115013214922	0.918356557041267	0.991003264190304	0.904500181065769	0.918772401243893	0.87947679742247	0.940143245656253	0.955359693558276	0.903269993625756	0.958977248186837	0.939538784276069	0.924015630188481	0.91110447078228	0.957771819177654
Cinnamic_acid,_3-hydroxy-,_trans-_(2TMS)_653564.75_TRUE	0.749452880897543	0.782755782957932	0.754007638273515	0.759884654476341	0.756619537679665	0.797422369763514	0.765039899143411	0.78929665219567	0.765680231237736	0.786889854200368	0.797819612909262	0.769012383586151	0.833718580650291	0.804716739662583	0.788797940773907	0.803179467609411	0.75923959197087	0.769383970645576	0.794479323755288	0.797690653339911	0.79732881985573
Cinnamic_acid,_3-methoxy-,_cis-_(1TMS)_587950.5_TRUE	0.903713744898596	0.951634759720966	0.966432083993709	0.901619553449482	0.892167784848172	0.849605753463337	0.918094507541127	0.89500850851749	1.00238969169431	0.861159569762515	0.969424980954376	0.922228366210356	0.986304887249711	0.872836934423035	0.954913238244977	1.04935279510428	0.976252751891188	0.98973650930829	0.949181714497508	0.957796169757544	0.999161408992631
Cinnamic_acid,_3-methoxy-,_trans-_(1TMS)_649428.75_TRUE	0.944453051504286	0.980691281542165	0.958210273509758	0.951428622176431	0.938644992945543	0.992221431222992	0.949846544846512	0.972952532251056	0.96446499848417	0.976546964264013	0.994965367303762	0.954624942451284	1.02553041232563	0.990924653759674	0.983207217916128	1.00314319255713	0.952317410228836	0.961204994040946	0.980517655005782	0.987754404624624	0.999508940706323
Citrate (4TMS) [MP-1.1]	0.975051371736898	0.949748905470341	0.973996709460092	0.992267966291336	0.961369572016645	0.925910665824225	0.953958494589508	0.925914545024911	0.94551096171172	0.939847368692777	1.00423903614016	0.936254425324135	0.962891977088688	0.908552604791074	0.93934079999658	0.949098578279732	0.925324025742616	0.899544733889944	0.932023976067606	0.951346797715104	0.941047928366345
Cysteine,_N-acetyl-_(3TMS)_554708_TRUE	0.715462337300304	0.704509857170546	0.715766487078536	0.72215620570467	0.710254506600471	0.73805339722331	0.694886681374908	0.722253674364407	0.695512123300318	0.708487585847994	0.739777766249364	0.720235219275229	0.689697864251685	0.71390512478141	0.703625305920156	0.66630090961815	0.706416400011029	0.676605142004539	0.698593354803494	0.731596135529172	0.707257116186428
Cysteine,_S-methyl-,_DL-_(2TMS)_426358.72_PRED	0.766222170248252	0.754711926773801	0.784392574468548	0.795674810897833	0.819196273514921	0.798291874023664	0.913617617809748	0.832558328371757	0.868165078439173	0.499414814323321	0.532543882245753	0.887861033681228	0.862754522903182	0.8597045572161	0.754481152789966	0.8692730626595	0.469247932691081	0.813446706633923	0.860837073378471	0.872265918748179	0.498592822830463
Cysteine_(3TMS)_479326.28_TRUE	0.62436453484211	0.689099381050925	0.639423395293252	0.660649687529675	0.704620618521349	0.699892084514669	0.649982636237661	0.636181373587805	0.654959266511702	0.714071794959532	0.669571040985375	0.611442902541864	0.676664406910851	0.715321438957941	0.666836443853253	0.66119512133745	0.657659905817508	0.641971073759022	0.673766957744732	0.700013772043531	0.67367117982712
Docosanoate (1TMS) [MP-1.1]	0.800993997448801	0.789758842539146	0.751814695845963	0.760043672387874	0.792720150741765	0.824998345254968	0.80424365961551	0.787722368998736	0.782894209519239	0.868487113401411	0.778986226283206	0.803629706607342	0.785698848587052	0.820128592398519	0.802811031965537	0.803179467609411	0.807750705679498	0.799447478605363	0.821368450950083	0.81828235462316	0.813164009270215
Docosanoic_acid_(1TMS)_904290.44_TRUE	0.759121720634582	0.737649814249277	0.707367415180536	0.727363571629868	0.759065476481164	0.768584641517619	0.761087884083471	0.737257901487414	0.73451706020994	0.820545657290585	0.738368039079554	0.775211708410515	0.742924674202023	0.768793482756402	0.767304042301221	0.771672137770699	0.77409218883167	0.758147960233448	0.772222352707286	0.780221075047917	0.765103639746827
Dodecane_260776.19_PRED	0.995707925978782	0.940197329815828	0.919890946409612	0.981223313731395	1.06253808871041	0.979650500154373	1.01716655187521	1.06209286754022	1.07432569088963	1.02194423028463	0.82548298790965	1.02287571574359	1.01318367137545	1.03762618302906	0.977185975750127	0.978660068309001	1.00028055895356	0.943696369048979	0.995326922815148	0.777832202103477	0.965169492857354
Dodecanoate (1TMS) [MP-1.1]	0.755657797703883	0.746355689145156	0.733595299649832	0.726495071979852	0.780520326794843	0.774433951190589	0.760781298045501	0.767417776638309	0.737951064068182	0.741161488443203	0.703509669536634	0.762175415160099	0.722018331672505	0.75596786245146	0.777351060298748	0.743741936317332	0.758635920953447	0.7494533041028	0.764372390747646	0.698628213728658	0.703216244155499
Ergosterol_(1TMS)_1051145.12_PRED	0.845251582229508	0.798841026799384	0.827351757764915	0.83513948028076	0.823688867609666	0.860912158412387	0.831811315909236	0.851720320026128	0.810545924186016	0.846601488663636	0.857389897218452	0.843018389528695	0.803649046265454	0.894069721891411	0.847607038667159	0.784427580062395	0.803291306936399	0.865598978290705	0.829585269088835	0.884214274744159	0.820995455072352
Erythronic_acid-1,4-lactone_(2TMS)_462181.38_TRUE	0.883997717837818	0.875793069552078	0.896194767615166	0.890681234660061	0.933446845252586	0.912071311579082	0.961773241006057	0.963340803369379	0.958011410322537	0.931300253375146	0.914856961560003	0.909121013569817	0.994949248372588	0.877542153721341	0.967288579326625	0.932486276253825	0.932266089558793	0.890966921026239	0.91446645188752	0.909636880581489	0.974205742930707
Ethanolamine [MP-1.1]	1.07922596942211	1.06983577272984	1.10712574854194	1.11298737896666	1.12288807297473	1.11481527141251	1.21984309028458	1.13151597416634	1.19077631404155	0.809341136116436	0.861418991394452	1.19344224082385	1.17393468944675	1.16507739115569	1.06407535370853	1.19931448964421	0.775003015177159	1.11912786870396	1.17388533788087	1.18020375053395	0.813257940658918
Ethanolamine_(3TMS)_321815.91_PRED	1.01852080053397	1.09632786275432	1.03929289107023	1.02737089847657	0.94813681479959	1.05543523261581	1.01741105559021	0.984003391297373	1.04020133699436	1.00269510894511	1.10148726353509	1.03947387227132	1.03363937990981	1.05426812061334	1.01751018223065	1.05999617858783	0.94498875949375	0.972953166588066	0.999106514569119	1.09569882355196	1.01057670404867
Fructose (|Psicose) (1MEOX;5TMS) [MP-1.1]	0.698727454274143	0.688657875673234	0.758535640189765	0.715598227743671	0.66776597884131	0.70980797144228	0.713199675175085	0.71442959784617	0.713317410900247	0.732074686751726	0.736938553353257	0.728032836402579	0.829955578068032	0.700506290022942	0.70896130218031	0.723893243364591	0.773502468268739	0.778801810416857	0.825631581950317	0.741985279584935	0.802857586301632
Fructose (|Sorbose) (1MEOX;5TMS) [MP-1.2]	0.636921987955724	0.601145025612881	0.69356042280487	0.675217513414914	0.623659008714041	0.638182610368826	0.703559610625833	0.666128651626387	0.645210005930649	0.686175784115223	0.697226491496657	0.639369265724421	0.767802724807529	0.64717268279972	0.643912964612822	0.65688382276806	0.698949504135116	0.730141339424212	0.774045880722044	0.695079102622688	0.744043704067231
Fructose 6-P (1MEOX;6TMS) [MP-1.1]	0.666070350192535	0.703490005340573	0.676947224298318	0.699026543630145	0.634764943089394	0.668456437426225	0.701275761385231	0.712491564724642	0.631620934327796	0.685627354360256	0.784595932961086	0.73661303809035	0.623268852841791	NA	0.688478454828363	0.62019954152378	0.769142357950668	0.755955071312074	0.734186272793712	0.7611096874652	0.760257358126708
Fructose 6-P (1MEOX;6TMS) [MP-1.2]	0.547189908704388	0.67514352322821	0.642659533140017	0.674685858531688	0.603015483387241	0.64842673728966	0.697606206489757	0.701498201453061	0.59534148899793	0.700462758893916	0.773955189585368	0.723813391403777	0.571802828728572	0.668002407387089	0.675888160802832	0.498873983138028	0.769142357950668	0.762854106848315	0.747998365148068	0.757440050278216	0.754033990451836
Fructose_(1MEOX)_(5TMS)_BP_585803.75_TRUE	1.0265734982461	1.07227602205093	1.09193114475224	1.02266745235482	1.0096725503134	0.969209718444391	1.03739685069576	1.01283442843265	1.12556109580587	0.982504937461597	1.08715270309267	1.03189668845443	1.10148707445037	0.991236673022439	1.07077739720885	1.17161698793903	1.09502667208847	1.10717527088652	1.06762647458154	1.07494029268103	1.1181961977973
Fructose-2,6-diphosphate_(7TMS)_912183.75_PRED	0.679469359357022	0.697697106445395	0.680742802080379	0.728332207833479	0.67666847303738	0.712147275270242	0.763507542462959	0.821319147469112	0.729526067887477	0.84979418996449	0.824481122279692	0.791646697764779	0.665039423949588	0.763868507333503	0.770415192815563	0.61220563216543	0.776801360113851	0.800715196188279	0.824741264464245	0.807543681686189	0.773904875452867
Fructose-6-phosphate_(1MEOX)_(6TMS)_BP_(Derivate_not_found)_768948_TRUE	0.562451641433799	0.715121003075501	0.684948349954408	0.70372289347562	0.663887358404752	0.677843386327925	0.724595806105321	0.743591919131831	0.625267529049149	0.726753173258519	0.809770900473779	0.743862827126193	0.612127255749037	0.692275300977813	0.717560135214064	0.553589700435439	0.795961565198287	0.800535038702919	0.778784394001403	0.787067337125704	0.782846393764863
Fucose_(1MEOX)_(4TMS)_MP_522432.03_TRUE	0.748368261981315	0.747963336835228	0.726278012129677	0.717513673517482	0.75471574898793	0.778201135641583	0.725253349914567	0.771968761630482	0.65548451062739	0.724223950346295	0.659933717939874	0.738002484457096	0.717801263101358	0.771061907512593	0.73735567316387	0.668576978545037	0.748307560037596	0.724390074984063	0.755006195899444	0.680091555001532	0.658183901073597
Fumarate (2TMS) [MP-1.1]	0.843294680767208	0.939341512767388	0.908188415539418	0.907813255247095	0.951317721725476	0.935065875926699	0.919193928545935	0.927094188545875	0.923843223054374	0.92830971374814	0.935210532934231	0.925201630707447	0.8938371043547	0.902012957159088	0.934669269521002	0.952787837743193	0.956396034447118	0.943309675498679	0.928135270059577	0.952825793758679	0.887108348592218
Galactaric_acid_(6TMS)_658294.38_TRUE	0.937614214168382	0.976798001722993	0.95146797527131	0.946326238767325	0.935688280540077	0.986913155442173	0.943036090082011	0.967573673619486	0.959536917611416	0.974365883976879	0.989717555509993	0.953611731297964	1.0189448495128	0.982733161624702	0.981068817440553	0.993725189132321	0.948374262207565	0.954316098591202	0.978289930846401	0.983229713855166	0.99630600135102
Galactopyranoside,_1-O-methyl-,_alpha-_(4TMS)_585464.62_TRUE	1.0405841034819	1.08545987408653	1.10455029760712	1.04006853416842	1.01721956415757	0.985927824608295	1.04675713199664	1.02011047852312	1.13480636709663	0.997568527577236	1.0975625017865	1.04336576585035	1.11280688453739	1.00145421662645	1.08576785167333	1.18296031729411	1.10750457351084	1.11836667894514	1.079306446707	1.0878731197865	1.1319011828526
Galactopyranoside,_1-O-methyl-,_beta-_(4TMS)_598177.19_TRUE	1.06145493913626	1.06428027569552	1.08737862653235	1.07063818597174	1.02373721651517	1.06352940707729	1.00763573627266	1.00782749085144	1.03797217906584	1.06011675526941	1.01691132575362	1.00521308809838	1.00954805296616	1.01150219868028	1.0531277458652	1.05399687205581	1.06131475825408	1.048291423248	1.0210904400911	1.01807436725	1.06533218442667
Glucaric_acid-1,4-lactone_(4TMS)_660551.44_TRUE	0.67669084558902	0.706893137808227	0.737516370242524	0.69674241924416	0.668468319489351	0.625519002351153	0.714017158849216	0.69378168653338	0.769047044226166	0.638417877012036	0.608697650876076	0.705358206263543	0.769620080241251	0.679454055932522	0.710280928158821	0.797716232371588	0.726598021507588	0.75882384624633	0.734186272793712	0.641190529929269	0.746983095187193
Gluconate|Galactonate [MP-1.1]	0.661579485207226	0.722965447400908	0.702604547500578	0.716440494778826	0.697715759796259	0.704718998232381	0.737123775159865	0.721898046044741	0.708937828769947	0.673541032176157	0.701695532315737	0.732749406820085	0.721627921261259	0.713000131695292	0.733494355362265	0.748879617961167	0.731997402199534	0.708057758714706	0.720797732263622	0.697223449044118	0.719330269724865
Gluconic_acid,_2-oxo-_(1MEOX)_(5TMS)_BP_593592.06_TRUE	0.779817316310319	0.827305021348405	0.843253273649648	0.781997385478604	0.78636342444708	0.735027432194291	0.805859329671045	0.785747254935759	0.882898955834087	0.742442579517091	0.8475872227258	0.807647071291979	0.86465573994848	0.762954666040144	0.829477548632692	0.92027073093538	0.8515648336361	0.866724947345789	0.836417500668521	0.840798231702483	0.866011132927778
Gluconic_acid-1,4-lactone_(4TMS)_646839.44_PRED	0.618775305856388	0.651352919570276	0.686196341255412	0.614034307579798	0.618762864209143	0.579171758702513	0.681424210909913	0.611351580727056	0.705446016383701	0.580528868508867	0.670126857821313	0.657077946517672	0.707548930059006	0.614908557203868	0.662083879500947	0.724559357424012	0.665093453096542	0.678958007015261	0.631755802307947	0.687250807881406	0.680968330701792
Gluconic_acid-6-phosphate_[-H2O]_(5TMS)_762561.19_TRUE	0.666070350192535	0.703490005340573	0.676947224298318	0.699026543630145	0.634764943089394	0.668456437426225	0.701275761385231	0.712491564724642	0.631620934327796	0.685627354360256	0.784595932961086	0.73661303809035	0.623268852841791	0.670353917031798	0.688478454828363	0.62019954152378	0.769142357950668	0.755955071312074	0.734186272793712	0.7611096874652	0.760257358126708
Glucopyranose,_D-_(5TMS)_678044.25_PRED	0.776274275897565	0.735403352976856	0.751428709881167	0.745231748893044	0.75549345744123	0.799002570597387	0.748322284327861	0.756338823293955	0.708937828769947	0.774564644808073	0.778172773071987	0.746219443091834	0.71836841435393	0.765089054634058	0.744908507763017	0.692647314430697	0.746369857113134	0.727715418075434	0.751503428858357	0.799363923855405	0.770232290932987
Glucopyranose_[-H20]_(4TMS)_561007.94_TRUE	0.736672345981824	0.735403352976856	0.743507216206988	0.721814977762769	0.728648789302773	0.74862114224685	0.726771126863091	0.761121059085675	0.724012043293432	0.746347140812599	0.805341243017967	0.749345540040253	0.735154873937606	0.748878087856846	0.754908963343559	0.731933183335429	0.776801360113851	0.753360419663335	0.739605355213894	0.765117494205328	0.765914681785849
Glucopyranoside,_1-O-methyl-,_alpha-_(4TMS)_613929.06_TRUE	0.788930560933615	0.792709519637749	0.782959883895017	0.79097294168693	0.741800203971169	0.824998345254968	0.812320375504752	0.77079566249566	0.801745534986555	0.792396884593125	0.807273591527274	0.792713392806987	0.759813314239702	0.805767955470962	0.79198507773641	0.790895878688734	0.778130239648836	0.764461691229372	0.781294743816807	0.79843774198147	0.806021130227108
Glucose (1MEOX;5TMS) [MP-1.2]	1.02454572639593	1.04551916295693	1.06539053013438	1.02552747767278	0.999812333453308	1.00155968777917	1.00196004661846	0.991529955659047	1.07297695494054	1.00273413042143	1.0477023848324	0.999810474869578	1.05529677798722	0.979422843035999	1.04981712193252	1.10960428615214	1.06221985665581	1.06619804506494	1.03251497200608	1.03581424486396	1.07582773876076
Glucose 6-P|Galactose 6-P (1MEOX;6TMS) [MP-1.1]	0.65608605589328	0.825511129950481	0.804930305789327	0.818796022516245	0.753385953759587	0.803556911226244	0.829147326080087	0.848073518060806	0.745812744150637	0.844923069905725	0.923706279444681	0.857983651813129	0.717067364752868	0.802518746211143	0.829928267070034	0.659777412267163	0.913152533138088	0.913834230153147	0.888838035426585	0.901559339176754	0.89699987752444
Glucose_(1MEOX)_(5TMS)_BP_599322.19_TRUE	0.918262336077463	0.954117575102889	0.973874485804674	0.918802727100369	0.902926813076727	0.876962269756348	0.914833264537304	0.89598854335825	0.994582399821475	0.885757525433376	0.963292376144878	0.910590332399149	0.977146697643067	0.881253654681657	0.958713624765321	1.02896231521987	0.969133068396482	0.985391934439751	0.94596937245574	0.949569840049473	0.990071039707312
Glucose-6-phosphate_(1MEOX)_(6TMS)_BP_781714.75_PRED	0.512650739078146	0.652190290808725	0.622563664749482	0.649767163126891	0.625168802619731	0.618705303699314	0.681424210909913	0.686135483434141	0.606590402989195	0.672610334636344	0.759279114702916	0.695460154236597	0.555403662142628	0.633523996309102	0.667167747062158	0.473811381650234	0.748640940665169	0.736429904394206	0.723573678636594	0.735132506731009	0.720915668053854
Glucuronic_acid-3,6-lactone_(1MEOX)_(3TMS)_MP_657311_TRUE	1.00550943263488	1.03674934108871	1.02072050075199	1.0123343830383	0.997996677024108	1.0525923591074	1.00607977054222	1.02893297261722	1.02052933700139	1.03456634372917	1.0486857853676	1.01251501638564	1.07917861808939	1.04779890586207	1.0418157797711	1.0618829943891	1.01142769546315	1.01938545230215	1.04030301992963	1.04428462708787	1.06109555963598
Glutamate (3TMS) [MP-1.1]	1.22486515865824	1.24123656220855	1.23818504731766	1.22816237215374	1.21648211692215	1.2564024714668	1.19651651283683	1.22785289454885	1.21291114332532	1.26618884692222	1.18131627668778	1.21303756110822	1.20446246586177	1.24106662391927	1.24015111699651	1.2134523777331	1.25487565238679	1.25419008852602	1.22106054303427	1.21587361558849	1.26027282541822
Glutamine ([-H2O]2TMS) [NN-3.1]	0.756126288850594	0.756352981468695	0.743922635535003	0.768147671878948	0.797368809448208	0.781060523820765	0.735558249818713	0.703316339736444	0.704255323884925	0.843728834444917	0.78961295108465	0.740219714458369	0.689375542538754	0.721422260912125	0.722921600716523	0.6871224451508	0.797698908906071	0.714551683869053	0.727261176725776	0.747176954039664	0.811554278534423
Glutamine [MP-1.1]	1.29734051918546	1.28705667752385	1.3193884209371	1.31064031691138	1.25920770095133	1.3063163903716	1.21529107370684	1.22547773040112	1.21634299228258	1.2978625676596	1.19650486794114	1.21257794016681	1.16683470745348	1.23891522557356	1.26679047873956	1.20619451149331	1.27129639002591	1.24763236506377	1.2239261590323	1.20931954912183	1.27361435853685
Glutaric_acid,_2-oxo-_(1MEOX)_(2TMS)_BP_486148.94_PRED	0.701642495096391	0.698102362410582	0.697301767040032	0.709379276282532	0.686510540296267	0.712724049921456	0.697893275859505	0.713426507426716	0.661422645424602	0.717162028493232	0.600533924070822	0.722947575561646	0.650173690654222	0.717227514707074	0.697877701893685	0.618407564120975	0.683454096319753	0.68584878291213	0.690469081186197	0.608035746890868	0.705060293749075
Glyceraldehyde-3-phosphate_(1MEOX)_(3TMS)_BP_571519.81_TRUE	1.05078543330285	1.05592505967144	1.06649235679202	1.05787429133575	1.03220113361318	1.09098053051624	1.02345905700611	1.054967830542	1.03399491084464	1.08579164893699	1.09555268731127	1.04935544443868	1.02075391447632	1.07656628399494	1.06333308201248	1.01385061414988	1.07816870039971	1.06518499549571	1.04257316526532	1.10058095328684	1.05447397026401
Glyceric_acid-3-phosphate_(4TMS)_606948.88_PRED	0.752641294954115	0.632280695135784	0.747490723308971	0.54692733317612	0.637457041416163	0.655602334815019	0.76693516568418	0.70070876879987	0.72552921214443	0.717769199825248	0.549705239466597	0.724999897816354	0.756209995332091	0.693756470460619	0.677097815358964	0.814991343417778	0.737596401769182	0.726894014648395	0.794944795218025	0.548857232653301	0.746631125688575
Glycerol ((3TMS)) [MP-1.1]	0.948066114943193	0.914471860931576	0.934857264316307	0.941742343241677	0.928002137773602	0.942070944467615	0.94941495441133	0.934763362755818	0.923257945061141	0.995428185459043	0.960492898268873	0.918921541092338	0.958504756733121	0.911616645243444	0.947070902467224	0.998434290040284	0.953048044732369	0.94520652454587	0.97295571931454	0.978310752043786	0.950023877966981
Glycine (2TMS) [MP-2.1]	0.985687117178425	0.964139619950627	0.964046909346053	0.899400762040167	1.04422753822973	0.908761200928067	0.930413722288995	0.993789537560714	0.865483556738747	0.909611415169679	0.812723373497934	0.886721490005084	0.956237665288047	0.923662203250335	0.973231126182529	0.819560606667714	1.00224352623837	0.952047095169464	0.892229993731942	0.785768330060328	0.977007473672331
Glycine,_N-acetyl-_(1TMS)_334790.31_PRED	1.01568927606907	1.02228455902172	1.02687125212522	1.01855425697488	1.00056299964008	1.03645838454048	0.999641979730033	1.00569977461707	0.972734302267341	1.01180081822029	1.06453944433646	1.01045217926687	0.987577082306164	1.01705888589835	1.02190246219312	0.984098830963965	0.999906480348814	0.97419607572117	1.00652247060635	1.06678523074788	1.0076291331408
Glycine,_N-cinnamoyl-,_trans-_(1TMS)_772530.69_PRED	NA	0.717614742144172	0.697780315518905	0.728973085475918	0.688829394029605	0.695376808193551	0.754499514407857	0.749818524001539	NA	0.743314257651402	0.818448415411872	0.75661303039824	0.655576091744314	0.693572523199792	0.734538134550243	0.579987765653997	0.798996249029219	0.801789624664589	0.782439467472537	0.786942351972838	0.77824155222196
Glycylglycine_(4TMS)_591933.56_TRUE	0.651559364108241	0.695370720813826	0.722170417198295	0.655879590780202	0.647221771647502	0.609284502991282	0.695768848495665	0.649371615666355	0.764593797564034	0.632401118089103	0.725848135575	0.690022060444782	0.750434662450366	0.657735691089945	0.704321932092573	0.797048019199366	0.726083780889526	0.746915625886156	0.711543010381737	0.717403570190679	0.747857928435591
Guanosine-5-monophosphate_(6TMS)_1065235.12_TRUE	0.758056211884695	0.774668766392042	0.767474375427249	0.759246187975813	0.775992401161625	0.782963731502818	0.73269100702955	0.776114698624599	0.745594155478781	0.781785497954021	0.787880558913042	0.760263785276895	0.757863795852447	0.824010015324709	0.760720611370232	0.756352691915303	0.777182754897638	0.807844735677186	0.775743697506964	0.809631201059332	0.745032605537316
Gulose_(1MEOX)_(5TMS)_MP_584150.19_TRUE	0.580010131760788	0.612374715350885	0.627874144676184	0.600275196548422	0.602481926018365	0.51118162693697	0.5851238304029	0.614735857482717	0.64712136140607	0.563304739291145	0.662951456922083	0.650783750769124	0.66734004298484	0.591745201459614	0.635067859686811	0.68408616635361	0.638428348954139	0.659329885075013	0.642574195108132	0.617783229189076	0.652758776710194
Heptacosanoic_acid,_n-_(1TMS)_1053682.38_PRED	0.953287428393033	0.916812122125469	0.942029419225473	0.951833176679921	0.938427428288179	0.971221685719225	0.937773550939092	0.965672947301886	0.927060824297681	0.960845317873133	0.971279036360212	0.9518083562988	0.917647709016877	1.00450025545962	0.960592552388471	0.897668598499319	0.925758044273062	0.981324765892552	0.94650898672319	0.998703903191631	0.931990255715545
Heptanoic_acid,_n-_(1TMS)_255612.95_PRED	1.07175528928018	1.00913024962627	0.992017610642914	1.0512492583218	1.12588289556899	1.049250921647	1.08812498493117	1.13810739046848	1.14905406058645	1.09502973913925	0.893236265187503	1.09208617917429	1.08181383854188	1.10979602356741	1.05283183412844	1.0526920514582	1.07293549755079	1.01323256946939	1.06961013279848	0.838317879913187	1.04045014425381
Hexacosane,_n-_908082.69_PRED	0.693352896948779	0.674470684655753	0.640512958754151	0.64256173668571	0.684497160667655	0.708018653890496	0.694590900147044	0.653266887567011	0.657044392903459	0.762630031500193	0.670817396254537	0.685836107618182	0.669458554174845	0.70304977967599	0.677547833881956	0.685854593800756	0.677082115318001	0.675408405699078	0.715431664191661	0.700013772043531	0.691717683966
Hexadecane,_n-_486353.06_PRED	1.01567601922524	1.02395883845816	1.00862387879465	1.02476401831975	0.980399368566523	1.04459105049614	1.00595873419516	1.00925616758458	0.965405655338535	1.02812388956081	0.866595266415042	1.0161459783606	0.971854986922653	1.01911190627656	1.01929053006959	0.929629792123415	1.00035673846562	0.999459514753158	1.00268045629264	0.862920833616894	1.02012484669853
Hexadecanoate (1TMS) [MP-1.1]	1.03803653663745	1.00260496631005	1.0286352405521	1.02425855554115	1.11159383909859	1.02651225344328	1.06458095900718	1.02455845058661	1.01676132795723	1.02641911667497	1.04112474995024	1.03833733120281	1.03867016625998	1.01185824124339	1.0034959875216	1.04252333993497	1.02056179671637	1.00574705944589	1.01295162556986	1.01845712780297	1.00699956737286
Hexanoic_acid,_2-ethyl-_(1TMS)_254181.88_PRED	1.14440733216769	1.0813062733859	1.06392307264623	1.12377090659951	1.19680846950137	1.1241103459647	1.15788659653099	1.20884920091606	1.22556241306544	1.16752040261493	0.961126118018395	1.16134445567743	1.155443610394	1.18041486640061	1.12605371719102	1.12745905400085	1.14877944218213	1.0876098468067	1.14267104095045	0.902842675554124	1.11262731888382
Histidine (3TMS) [MP-1.1]	0.710894686868391	0.679736725846309	0.707512910094248	0.743295699076848	0.612413523764821	0.762246778443796	0.665485712569696	0.640291982302865	0.636141813787054	0.753241096767201	0.642070794937526	0.629600196813006	0.594512494565752	0.642980499418174	0.669780860770835	0.68079326796082	0.741941569434347	0.640507383704451	0.626799046968183	0.622326539443103	0.747596237407092
Homocysteine_(2TMS)_506276.72_PRED	0.844446234547059	0.86031912729507	0.839780190385135	0.840816422908912	0.837537017256218	0.875433910370183	0.835946904603789	0.853952891397355	0.83619434696086	0.884973013685614	0.878760631059227	0.851519110452965	0.836846948403361	0.871192022480084	0.854167569679357	0.828936269342581	0.869164201559934	0.866223363436082	0.854629401588333	0.876228883657079	0.87280152000412
Homoserine_(2TMS)_380616.94_PRED	0.912172866343171	0.899379582825659	1.03368291918773	0.927734764313693	0.949139884077208	0.959311267500015	1.04764466446849	0.960014644528021	0.983703032033325	1.0370682273034	0.502308683424195	1.00018952513042	1	0.961454662514555	1.03566237597119	1.03074613343558	1.08329264122867	1.03731925821611	1.01252701889556	NA	1.03325235152334
Homoserine_(4TMS)_510930.09_TRUE	1.00950633541313	1.02573909191566	1.01880455508481	1.01318507774217	1.00167607091995	1.04199122878328	0.991197807906142	1.0187783639696	1.00191599864823	1.05173947618328	NA	1.00983832253722	0.995956919143886	1.03191515723649	1.0253107379832	0.994933018446507	1.03640344472556	1.03746657989033	1.01389830603204	NA	1.04030210753325
Homoserine_lactone_(2TMS)_458933.88_PRED	0.846876958638567	0.838328193527792	0.858685670448927	0.846381050029775	0.890089218099536	0.869657414815505	0.917275519386575	0.919205135376792	0.912184923764229	0.888506402348423	0.876294129168436	0.869559572282518	0.954585513378903	0.835888284721791	0.921694995144775	0.8923702345674	0.893838355567716	0.85150896354533	0.875276714018562	0.875796129923771	0.934287323281736
Hydrocaffeic_acid_(3TMS)_667708.25_TRUE	0.652188215244779	0.610841953522846	0.608196558556668	0.582360985587039	0.646007519711831	0.671054188973765	0.680746763720889	0.711942118865763	0.752027002229027	0.633314769664813	0.777352779849903	0.687855950213529	0.716903550608585	0.71405516150963	0.661036597639179	0.678425834223148	0.592129422455123	0.65015291358389	0.684322046309396	0.830463229155389	0.660993808864643
Hypotaurine_(3TMS)_509415.53_TRUE	1.12305498670048	1.13981436305007	1.13216736204214	1.13464013198397	1.1121011700864	1.15970009789107	1.10264462702021	1.13320878298861	1.11171602198298	1.16368811971562	1.14513546930353	1.121937866799	1.10926978003229	1.14188524578014	1.13636486021736	1.100138868327	1.14946326533194	1.14707224626633	1.12824522210088	1.15199889936604	1.15478590754753
Hypoxanthine_(2TMS)_659841.12_TRUE	0.718512385055442	0.779880758428153	0.74556845687728	0.709635162841205	0.782779434009605	0.768922034676495	0.745443722474438	0.75232027322414	0.738577531824549	0.799343804556184	0.757823307271816	0.759201149603651	0.730174998360806	0.781384156014071	0.75737005763671	0.818835351641568	0.809538886416475	0.80316117134318	0.806560077652688	0.784793675401136	0.719101831759761
Indole-3-acetic_acid,_1H-_(1TMS)_668169.31_PRED	0.746421527736639	0.734166207776316	0.758354506355243	0.752811038700256	0.774172984289856	0.770061131519931	0.793373584051812	0.772442774815715	0.783653670238022	0.749591592665098	0.792950328489428	0.788549185086117	0.771309660164812	0.778480648924261	0.73488374656139	0.762640313923171	0.750128223815563	0.730230108754021	0.755292703640883	0.772878581549097	0.739992959729049
Indole-3-butanoic_acid,_1H-_(1TMS)_755498.5_PRED	0.712674992671693	0.707511453609034	0.704863415749241	0.709507296729124	0.719315122748535	0.733150163272922	0.703830224588108	0.745185279292747	0.700372696689862	0.730658280536392	0.666458695449274	0.733714479355517	0.717801263101358	0.729252400817197	0.722630881049896	NA	0.709236710164379	0.718201831431673	0.722945843675655	0.65990129366072	0.699841141674191
Inosine_(4TMS)_904803.88_TRUE	0.91345774390673	0.899100116444287	0.871294916683421	0.881408110481422	0.915473972271836	0.942278054024574	0.892677921002543	0.886582590341181	0.886275736304449	0.983503375797758	0.882386617792911	0.905595056403921	0.89026757419371	0.929461037177091	0.918007648672254	0.919587106276647	0.920379015232315	0.916050487300301	0.933248195870176	0.922848851112226	0.925582006628508
Inositol,_allo-_(6TMS)_550276.69_TRUE	0.922408326650439	0.914971602884418	0.92785005251895	0.930302734958447	0.903639614509481	0.947351997550839	0.900565949322546	0.92488955510547	0.904030123477096	0.916647752882211	0.945491819615262	0.915153249970122	0.900111235494269	0.922871517873233	0.91787404008064	0.862232466249966	0.91123457483536	0.889656985933178	0.913413236332406	0.944758026451056	0.906648478661165
Isocitric_acid_(4TMS)_597989.19_TRUE	1.01199989280546	1	1.03119944601278	1.02354551132877	0.992043417736723	1.02223364268034	0.950649854473907	0.960514441696579	0.942144937685489	1.01874993390627	0.928504409427253	0.945696406594622	0.902769365774381	0.973358319016569	0.983823711996186	0.924215103863868	0.988759622888331	0.968329810040416	0.950057193768978	0.934807038815423	0.990220907165133
Isoleucine (2TMS) [MP-1.1]	0.846975661365616	0.794127340559018	0.813677972195598	0.78777960697393	0.823444407583204	0.861583460191933	0.812412365252995	0.828099670155172	0.824011397219481	0.859237547332716	0.883777792530739	0.809512497536859	0.826186400333284	0.817772760858841	0.834132035769629	0.829307772643209	0.848741530086074	0.841859516353226	0.813108276293904	0.880009415977675	0.830063743315563
Kestose,_1-_(11TMS)_1034658.38_TRUE	0.750854583220623	1.01993807366924	0.950666783788116	0.869165022321016	0.934943184987933	0.888492122870515	0.786834184641909	0.811982107040459	0.798651574040114	0.779915857737635	0.972651358015711	0.823733229817126	0.741134269728445	0.844980199510127	0.814277710106789	0.875848528681164	0.938696475996822	0.933768747088282	0.854220419944278	1.00281819092151	0.692749562752919
Leucine (2TMS) [MP-1.1]	0.907797704185541	0.865834301770249	0.900197558160324	0.85762648695188	0.876839581657632	0.93887420610677	0.86447049595726	0.89350739939664	0.898029059898821	0.913427407512751	0.947830642220992	0.86928371172524	0.901706566949014	0.890481762396632	0.895171849920294	0.897300350566137	0.906104012791749	0.90326380197006	0.879649714492269	0.945414701490122	0.90269264223767
Levulinic_acid,_5-amino-_(1MEOX)_(3TMS)_BP_591715.44_TRUE	0.802760088565032	0.840617006960312	0.854983944753646	0.791741745751401	0.783098113997974	0.736963106463401	0.808729219953902	0.796174351421199	0.89539763801051	0.755370826978839	0.86063008622393	0.818859134072948	0.88232825421196	0.772615477512591	0.840604756927633	0.932377223325257	0.867240038095922	0.876626140913551	0.845180016508009	0.851837678147479	0.888546427254785
Lysine (3TMS) [MP-1.1]	0.98992740247511	1.00456131419915	1.00664012100925	1.00531864038206	0.926332635513838	1.03023789387804	0.978500403115637	0.96652286251383	1.00878568256353	0.997664155632848	1.02685225888959	0.986078556366385	0.94821911608033	1.00896586627531	0.999079040666571	0.998976266162171	0.959595958649238	0.974255295058163	0.978207415878061	1.00379911158548	1.02065470809465
Lyxonic_acid-1,4-lactone_(3TMS)_580326.75_TRUE	NA	0.654459306440786	0.660939560448352	0.61835149939764	0.655339061408641	0.637713723875626	0.65360689904996	0.633975184375191	0.678968270827442	0.59692654826002	0.699016796967421	0.648263572926862	0.694208382434261	0.650489092547669	0.67947572734033	0.709863072410423	0.676588299657872	0.677788239992523	0.664115765396072	0.664190034404347	0.668817818795021
Lyxose_(1MEOX)_(4TMS)_BP_488187.75_TRUE	0.79437903706176	0.797904568152144	0.778016427779572	0.801152130970096	0.7716106750672	0.810764496360795	0.793484603834172	0.79695128500464	0.736447783622334	0.796118460652025	0.647402608355325	0.809344352545524	0.750962889300765	0.808100729322827	0.800816512802504	0.717228728295301	0.787336629882895	0.786459649771871	0.777551473788992	0.641541195037866	0.797110293462438
Malate (3TMS) [MP-1.1]	0.948116483026643	1.01500904998626	0.99651966307856	0.998227119872648	1.02071830090041	0.982580857038001	1.0010740608099	1.00412573016545	0.956783985187477	0.987975040368225	1.00515124542402	0.997230314323123	0.980929330205526	0.96830938663327	1.01470801780912	0.989581579759739	1.03309699891191	1.0200241523481	1.00574142953262	1.01808714925358	0.980628060556981
Malic_acid_(3TMS)_442513.44_TRUE	0.843905894779201	0.914454586076593	0.889173616199262	0.899122797149168	0.920930387859796	0.875115747433069	0.904988956796555	0.90619045605799	0.856147591231935	0.882169254782386	0.907450317382959	0.89215887535857	0.882567599410747	0.874289995084919	0.91131354241285	0.883730328884737	0.927750014903477	0.917711339160706	0.903446836565044	0.917681665841902	0.877097738366124
Maltotriose_(1MEOX)_(11TMS)_MP_1072282.38_TRUE	0.489929669217023	0.510104079897694	0.520395409363423	0.523850521154691	0.558313343124287	0.572829969478752	0.607362894048811	0.52492635524052	0.53505051198141	0.552007416274061	NA	NA	0.521043526018743	0.423305019140305	0.470526249506837	0.59028933887797	0.515418916488026	NA	0.619861552740597	0.65009622702261	0.656544073858065
Mannitol|Sorbitol (6TMS) [MP-1.1]	0.859575495058335	0.86752042520829	0.881373573409233	0.87656790472436	0.892820354151612	0.883021821839913	0.927210381022622	0.888756532001669	0.888564469307335	0.889109670238218	0.922359675784882	0.903365573497815	0.891850217355762	0.885947706230851	0.873129753140808	0.891158532170619	0.889976753854422	0.871498122039048	0.897979436542274	0.915325171214507	0.880134312576426
Mannopyranoside,_1-O-methyl-,_alpha-_(4TMS)_559825.75_TRUE	0.884574629415335	0.855924277733378	0.869438707233004	0.861359362314146	NA	0.887123699997143	0.876223100587609	0.864063796803196	0.909328831132134	0.897045473113858	NA	0.884270543833611	0.885705906393898	0.86349300956313	0.885861123824752	0.847234635215877	0.867159096265583	0.860640924662779	0.857530532569467	0.877447922529504	0.897889390765491
Melezitose_(11TMS)_1053876.5_TRUE	0.764293346723121	0.735119145305495	0.766806090842165	0.759884654476341	0.754475255130801	0.78302265458994	0.765333810156568	0.784497472013434	0.751201315857486	0.770331865350513	0.794107464011141	0.779468562033822	0.733429222876615	0.821439261806985	0.771026411493215	0.708841157937884	0.726803016402305	0.797097876666005	0.765465188324186	0.809764414506407	0.746100965497186
Melibiose (1MEOX;8TMS) [MP-1.1]	0.660812033706468	0.669105078237477	0.664250390052574	0.699589970862762	0.638024782297719	0.687780940176713	0.754172168174826	0.806047543495464	0.706729476396221	0.823432709532997	0.804565352706107	0.776038584043051	0.654214220900366	0.754729344821533	0.748450922195781	0.587100442685215	0.755875723172781	0.777346687485681	0.799114897846233	0.792813618863344	0.756229918535312
Methionine (2TMS) [MP-1.1]	0.821964428822906	0.790378083918255	0.790680723881595	0.777038632950977	0.778780657646336	0.866272852795823	0.812228301657993	0.815565436615674	0.859273548837781	0.822957069355443	0.850630559376526	0.797028126220507	0.801434265053253	0.818301110728559	0.804370718147448	0.829554720283671	0.801089870626004	0.814279298540693	0.794245784253432	0.870471885413418	0.833685436855656
Mevalonic_acid-1,5-lactone_(1TMS)_454636.47_TRUE	0.841750946455089	0.836894558335444	0.862814967375724	0.845284121907206	0.884093792504405	0.863708704375237	0.91730797443891	0.919541631221657	0.910442381234648	0.887131164168303	0.870632734971706	0.868234607629795	0.951084708376971	0.830697622935326	0.923455595490874	0.890397020008328	0.888157451484829	0.848656089000954	0.872343191508558	0.876315213090079	0.92733664306525
myo-Inositol-1-phosphate_(7TMS)_788938.62_PRED	0.688432639039357	0.653433992806074	0.636650214141099	0.65735420140378	0.663594094246505	0.680846717517356	0.665485712569696	0.661285095007451	0.673101660478989	0.732775716036387	0.784415335947137	0.701533027411557	0.716163086214053	0.668477167270344	0.661735955699476	0.686806900853282	0.719489281157645	0.664637368014843	0.66770779030515	0.794181279502594	0.699566422723045
Nicotianamine_(4TMS)_902113.62_PRED	0.739446841395819	0.73755716234861	0.704115716615864	0.720438981031449	0.757616643084074	0.789254857274707	NA	0.735780388239805	0.731885261941012	0.827407670834401	0.726168613881038	0.769432332205459	0.736784254862928	0.770467699104361	0.757578324212119	0.767989668131111	0.748140472946689	0.762529581029546	0.77452035525295	0.779056210323199	0.769524818484264
Nicotinamide (1TMS) [MP-1.1]	0.939952581670892	1.00315701270344	0.995073291370961	0.957377747369268	1.00327606725962	0.988773484019887	0.973065907818621	1.00122499751687	0.919187528995899	0.999027488394387	1.04932718376864	0.963687765416481	0.951432223927926	0.985548954123137	0.992889218726361	0.983926436119955	0.999791700220584	1.01111955775723	1.01503955883244	1.06098647631569	0.93687163040679
Nicotinamide (2TMS) [MP-2.1]	0.684508634328329	0.749629493089774	0.719602431998826	0.718223140558238	0.70223666830124	0.728403860475558	0.762304979689346	0.672046935888011	0.641077108361137	0.777842288653412	0.620851098795215	0.694306886525972	0.661982303005227	0.647757431614314	0.726160864312211	0.684571397432638	0.774026827236792	0.698754607501738	0.689378801625001	0.588481297980292	0.698599247914119
Nonan-1-ol,_n-_(1TMS)_336924.19_PRED	1.18066406554714	1.18590742747727	1.1951972815184	1.18284621002558	1.15977170132631	1.20001399906689	1.15552913950338	1.16100790466167	1.13864268939377	1.17424377448258	1.22286162333176	1.16935309141224	1.14821929925241	1.17278369332296	1.18755724467295	1.14836229706314	1.16486203500073	1.1389862691451	1.16308916803199	1.22203399379806	1.17202313511473
Nonanoate ((1TMS)) [MP-1.1]	0.706744327747107	0.689976876781671	0.818033287800128	0.714505391121899	0.741458799214134	0.75534855168759	0.836310185395771	0.75094406545432	NA	0.819527309701747	0.603506090694048	0.807960416900005	0.791860652667617	0.763959432453428	0.819874758247148	0.81658288561881	NA	0.815885839269916	0.801862898618545	0.587888652342373	0.810740131646241
Norleucine_(2TMS)_337195.69_TRUE	1.33309084005542	1.34358605897071	1.35246572205547	1.33631096301147	1.31305933515952	1.35289033239864	1.29523950187679	1.31116053882765	1.28564783475566	1.32553579261085	1.37494643776828	1.31079122256133	1.29393779878746	1.32133823177403	1.34644085805479	1.29909747352284	1.31441946684523	1.29122522992321	1.31047872150103	1.37624135739222	1.3260301492458
Octadecadienoic_acid,_9,12-(Z,Z)-_(1TMS)_775215.19_PRED	1.00265304056962	0.965552761527425	0.981816568458974	0.994259771690139	1.07277349506526	0.999480104073609	1.04247639957812	0.983285000144699	0.996151921051776	1.00728855070002	1.03812705109768	1.02617529924603	1.0013240594758	0.977205033687555	0.976401864720976	1.02562594731712	1.01619210887573	1.00693297009896	0.992559529445089	0.994796848903987	0.98298414697755
Ornithine (4TMS) [MP-1.1]	0.749867086120673	0.730365095153111	0.761569156262093	0.717276125989016	0.690759765750747	0.81419091366544	0.724375667360409	0.7082543980485	0.791984720934116	0.775321328949516	0.813779237409785	0.720988525390884	0.72147133421453	0.790179888433154	0.722533793670315	0.785616399427585	0.729031999197342	0.743770616473809	0.7371717578632	0.829454298915712	0.762404979866925
Ornithine_(3TMS)_(Derivate_not_found)_492548.84_PRED	0.893060571887047	0.901569483859125	0.879243517814525	0.896587777803511	0.855716836059838	0.917628350651108	0.887155855074926	0.893289269585792	0.853232927736715	0.905368235935913	NA	0.902138105935799	0.851963122609474	0.901750905022278	0.89867827110546	0.806040202509034	0.877363528426444	0.882643079370874	0.883777447447744	NA	0.895198088689582
Ornithine_(3TMS)_587245.62_PRED	0.750936458275277	0.794882948258764	0.812697862937724	0.751785423033149	0.739106411238018	0.697658708556357	0.77484830295725	0.743362210326035	0.846378056094308	0.711209773884396	0.820404005844399	0.773012908534331	0.833589341828587	0.739576398183329	0.794349477687666	0.891181523129335	0.817099611245314	0.837972912342294	0.799818133161021	0.807917199705933	0.837784553226754
Orthophosphate	1.45342405814371	1.46531706315233	1.47434669594943	1.45136346939345	1.43016731618615	1.47068686902826	1.39495446087305	1.43210405210641	1.39193399654946	1.44416368630817	1.4955420350686	1.41629400295279	1.3993250057668	1.44082772799623	1.47083403966436	1.40986916250452	1.42785293087444	1.41083122523899	1.42363519826123	1.49629525085154	1.44624008708949
Oxalic_acid_(2TMS)_236929.91_PRED	1.17724861918081	1.14732363379869	1.09541723403076	1.11598331796453	1.03033410901616	1.18381645144293	1.10787845348184	1.0748130930373	1.13325282802085	1.19146272376426	0.899155764898073	1.06481467807379	1.0213902275821	1.08162218940334	1.10676920919199	1.07893435441923	1.1568799768021	1.09614155394973	1.03225819552936	0.875917487359689	1.13360436560206
Pantothenic_acid,_D-_(3TMS)_680979.56_PRED	0.72435966383522	0.682743209093123	0.698256744956982	0.682723629761394	0.71108717852477	0.734934361386216	0.704369280838606	0.713271289178402	0.665938814130717	0.725355655148711	0.735853135479067	0.701283796130947	0.679313861536348	0.721003648454922	0.690876159115426	0.635863937550974	0.7001434471257	0.673740038203384	0.694612565890255	0.758217899279966	0.714545740579841
Pentadecane,_n-_462471.41_PRED	0.718400981287778	0.706893137808227	0.732332855091263	0.719511631498831	0.7448885986414	0.743855714634304	0.785761698560038	0.790810771881923	0.773204487916321	0.759706055591079	0.738083740255808	0.743537097647361	0.817927202186177	0.711933817925639	0.780902656670919	0.747373209253576	0.749056187141201	0.703682380473025	0.735237734226784	0.740414052525842	0.786173053417119
Phenethylamine_(2TMS)_490740.62_TRUE	1.21120303211535	1.21703625528796	1.2020792409767	1.22072366853614	1.17192318075471	1.2376322119132	1.19328491338778	1.19528579588134	1.15601787228732	1.22035918850573	1.04030085508568	1.20187353299692	1.1583184395563	1.20152975163965	1.21287864748307	1.12188377277023	1.1966740212365	1.19541344897685	1.1922556219983	1.03013565968731	1.21623550952986
Phenylalanine (2TMS) [MP-1.1]	0.823906282551118	0.794559780092115	0.819326805090449	0.803393022642092	0.797487285599507	0.870069703470684	0.78623976956388	0.80409294483606	0.818726382005739	0.830215279624233	0.856613613206863	0.800306946328454	0.793987058756365	0.820490103133698	0.807464587005443	0.807264733607592	0.808224232547156	0.801700512448915	0.778238279455557	0.871345686683329	0.819057958588872
Phenylalanine_(1TMS)_492082.22_PRED	0.968090133037855	0.977112910923615	0.959195955453946	0.978634895256049	0.937512546200213	0.994958508806469	0.962514777995778	0.968510663422209	0.921282695070501	0.982662809582783	0.777304339033519	0.975121463055564	0.929939442952915	0.976797418217483	0.97895988115787	0.884271513754805	0.959315177354007	0.959639611866852	0.962392990078592	0.775385655544946	0.977574909170829
Phosphoenolpyruvic_acid_(3TMS)_528164.19_TRUE	0.728288112851327	0.578993950837381	0.691892273540362	0.563868206285488	0.602481926018365	0.57958123446498	0.709691887529907	0.579440263071264	0.764229096668719	0.650079754709559	0.50721646839267	0.605954366381745	0.695634562118664	0.611192621986724	0.527325060309679	0.850016283757766	0.68483614915056	0.68666196507155	0.714151945619717	0.521435308941798	0.649054928575094
Phosphoric_acid_monomethyl_ester_(2TMS)_258939.19_PRED	0.950604664212231	0.88330041654086	0.872462535848767	0.922661964061205	1.01134163057	0.929476396667146	0.972172781051217	1.02755973475214	1.03425776487112	0.977214075259705	0.781574400933814	0.976399130576115	0.967723706459161	0.998545783373546	0.936597877114397	0.935812454179326	0.953607553849798	0.89667423244953	0.952680017340521	0.724052651764998	0.91337982247358
Proline [MP-1.1]	0.948606313736822	0.896898525220078	0.934364038628688	0.888880905006911	0.902786461553835	0.98630265975362	0.887636240950375	0.932887512350635	0.955637140221227	0.923711739356072	0.949339656403443	0.908770898479624	0.933594341375361	0.930227065502108	0.904868282379796	0.936429348708205	0.904696331407953	0.9099324893448	0.895095028560122	0.985282026517345	0.969735987068434
Proline, trans-4-Hydroxy- (3TMS) [MP-1.1]	0.776595508999569	0.77262917421194	0.772596905912185	0.753489313927011	0.802718492294885	0.807596126014769	0.794258334418399	0.814864592072225	0.784956973809533	0.78945229163406	0.830263361308128	0.829163786680104	0.800505901490951	0.784686507613202	0.794056849872571	0.773291913234977	0.758028768036357	0.775699235118301	0.783441445770756	0.815867121157241	0.820470557038566
Proline_(2TMS)_340374.03_PRED	1.0751713144413	1.01862293780756	1.068170051678	1.04271658612647	1.02273792955141	1.08201418800746	1.03159290820703	1.03450504929035	1.04758025529339	1.06305466571467	1.10507583475699	1.00714891734826	1.02782718386246	1.02570575092353	1.01410307612835	1.08975895349526	1.02570726283412	1.05195646310922	1.03357241217493	1.10731931885774	1.02478160804444
Pyridine, 2-Hydroxy- (1TMS) [MP-1.1]	0.775369576142562	0.746355689145156	0.792279665589643	0.802438431854442	0.852501481615866	0.808014852416702	0.874467523412748	0.846219586410009	0.839887202072505	0.752159638544647	0.739917673180739	0.871424403596333	0.850178880312621	0.833970500855758	0.788231303910527	0.848651750048807	0.724001322368054	0.795169646956123	0.840499043914215	NA	0.725102814822309
Pyridine,_3-hydroxy-_(1TMS)_283546.44_PRED	0.642566137299973	0.623347256240943	0.653995636862398	0.657144793779735	0.676926471212301	0.665432491383791	0.758713187682886	0.668465235632202	0.703160825335581	0.596279024686227	0.667459327103753	0.739655891674197	0.718044717399348	0.688376210986427	0.628323946980919	0.706898107727118	0.576697230442983	0.660204496186299	0.704049158009756	0.738415129431247	0.593462935433436
Pyroglutamic_acid_(2TMS)_507313.84_TRUE	1.06373923003072	1.07715908836416	1.07050661428198	1.06505453221601	1.05983420083571	1.09506234504197	1.04835675726806	1.07193231177281	1.05455074767717	1.10143127144019	1.11356856946498	1.05958139588638	1.04863246911315	1.08429602046172	1.07752928066588	1.04970386431812	1.08983856672978	1.08725161609836	1.06356068992349	1.09543899980286	1.09054577829032
Pyrophosphate [MP-1.1]	0.84271414816051	0.771089983030507	0.762880754856464	0.760756317356365	0.750109245100453	0.81956732309679	0.829458330246009	0.835713781797079	0.942340267827661	0.841113793327457	0.753693991506614	0.854448219046376	0.899963730022137	0.816466345597904	0.84246136396322	0.823984394197494	0.810698969186688	0.844135348790969	0.78278910582668	0.749555842982952	0.905280702058307
Pyruvate (1MEOX;1TMS) [MP-1.1]	0.700459712521586	0.772496221065092	0.776648695730687	0.753065900481976	0.77022761837029	0.80277890470556	0.770575521870884	0.719299506674189	0.821769482509304	0.777785668005108	0.909180289260035	0.724999897816354	0.76539534783957	0.744556744619919	0.756952269445975	0.783416025047787	0.790346835969471	0.800535038702919	0.761775773233119	0.942286144996949	0.782155721020219
Pyruvic_acid_(2TMS)_209817.64_TRUE	0.868735736293336	0.83470682981656	0.853646439614676	0.85421615912053	0.834288639468888	0.875799827823238	0.862383574632543	0.871664026879184	0.860190764730992	0.904702353809192	0.879617113099871	0.875874324868971	0.873171617947467	0.867625878508073	0.888238464966227	0.845090557126647	0.87331822397251	0.862344913989407	0.869266494609432	0.888343598808778	0.90940776741214
Quinic_acid,_5-caffeoyl-,_trans-_(6TMS)_1052532.75_TRUE	0.719619989924808	0.671040450449201	0.703211564469163	0.700010585797827	0.704620618521349	0.733905102013161	0.719329527715474	0.729971119402782	0.707259576410964	0.728496805107117	0.743421957911276	0.726172408413958	0.685871981531543	0.774472899240522	0.712550744451342	0.664950282363265	0.686200291504885	0.747142050675773	0.714751158132413	0.760948186052104	0.705451298766397
Rhamnose (1MEOX;4TMS) [MP-1.1]	0.733533545489354	0.733878636696404	0.697141776717177	0.715598227743671	0.739246300381005	0.76451933011652	0.725471580629854	0.75352210394545	0.542096466074372	0.716039583442861	0.58517667646339	0.727395235176408	0.694208382434261	0.77016926154579	0.725313180059095	0.583394413917858	0.722838163072723	0.708386810416128	0.743149619740296	0.521435308941798	0.548303572946125
Rhamnose_(1MEOX)_(4TMS)_BP_570616.31_PRED	0.855742647830619	0.861296786383369	0.867517053347385	0.865495789281249	0.851041804244639	0.901009085669981	0.836912756510596	0.875649514646885	0.848175430339137	0.896883550675403	0.905180084911669	0.872321536855218	0.841017370749839	0.89154902740101	0.872626090045877	0.833389962940358	0.88306135255947	0.877682085776209	0.858796041857667	0.915054690212492	0.862474617699223
Rhamnose_(1MEOX)_(4TMS)_MP_517543.41_PRED	0.732173146934602	0.737278716496675	0.706049030746734	0.719161774357678	0.743624282543528	0.756946292313888	0.73167128752821	NA	0.65548451062739	0.702118062104823	0.405569766469283	0.730170589554377	0.716163086214053	0.771061907512593	0.731731107732074	0.54847232513553	0.744309141805902	0.715578554010557	0.75303617349738	0.568994876340069	0.645675512130309
Riboflavin (brk) [BD;1.1]	0.833449379951026	0.767175586394496	0.773781433167514	0.790318034078072	0.754475255130801	0.807782432759921	0.810930350493463	0.811168075246502	0.809608707793798	0.886834087651415	0.890158512628368	0.829645151738687	0.803509857785305	0.836548693763294	0.8532868946236	0.784427580062395	0.802396276880551	0.804254208655242	0.816762260142636	0.841627909324572	0.848704582741686
Ribonic_acid-1,4-lactone_(3TMS)_550463.56_TRUE	1.14206941541865	1.13621541140756	1.15097539154228	1.14303971212208	1.12155087639275	1.16223103452478	1.08881890183475	1.13254825410758	1.11502569770041	1.13186870257512	1.15059290871967	1.11337552440736	1.10405862636392	1.13329287948675	1.14101317183737	1.07864052659411	1.12413731085466	1.10615714885634	1.1189198761285	1.14574291963844	1.12404225263438
Ribose_(1MEOX)_(4TMS)_BP_501489.22_TRUE	0.719509752078527	0.649444126305902	0.699829776956747	NA	0.700717873801624	0.773985513302723	0.71571257535884	0.726357308661136	0.728412123327568	0.708597853441778	0.7922831657705	0.739768912368967	0.703138194866079	0.713453655087284	0.70829515826267	0.667255216742469	0.68189689565668	0.738989308348546	0.699490220798415	0.752701707350464	0.645675512130309
Ribose_(1MEOX)_(4TMS)_MP_503578.66_TRUE	0.947662300853275	0.962794622171923	0.946094903617374	0.947540293372102	0.936549048224782	0.980480712983264	0.930299696309422	0.958740763203563	0.94112980043667	0.984631719300305	0.955786885500313	0.948336228064931	0.936833251514721	0.969119505070977	0.961074192296761	0.931154412366211	0.976281472234735	0.969558202150918	0.954805709224738	0.966686148601159	0.97579273153187
Serine (3TMS) [MP-1.1]	0.973756648542009	0.93849243410575	0.94179899101867	0.918196334407411	0.932506909278079	0.988090167359985	0.933601151932575	0.962681792414653	0.948341942141429	0.902899859462237	1	0.938237412673062	0.907773091193569	0.944234284796214	0.924017233349446	0.92601780204952	0.929675186462824	0.920544748776244	0.914012995695151	1.00129609680837	0.975519758872422
Serine,_N-acetyl-_(2TMS)_491357.06_PRED	1.07009184545526	1.07845906842312	1.05849813765771	1.07883724557522	1.03671488397875	1.09721696696737	1.05921763991243	1.0661308921299	1.01726615311482	1.08412330732408	0.868969836019509	1.07136411516255	1.02346962681968	1.07296547495931	1.07839963555871	0.97813495190106	1.05299251370491	1.05840594768039	1.05924511892419	0.860911629786738	1.07559612551178
Serine,_O-acetyl-_(2TMS)_410213.62_TRUE	0.758818387804339	0.754396424280642	0.772834856924677	0.786239281803588	0.80490698194905	0.788642433381865	0.902150024691474	0.823793853375206	0.876248203706701	0.442689015178973	0.57008998629458	0.885399225800409	0.861721820832506	0.857612946426133	0.747767267251166	0.870313751161318	0.472737694661326	0.800715196188279	0.859228079737021	0.87674576057797	0.412593202174355
Serine_(2TMS)_328955.09_PRED	0.985863213938504	0.995640455365491	0.995263926565478	0.988905708543764	0.975551069106337	1.00581840640011	0.966368914594686	0.980943366990619	0.94433732438625	0.985556344593119	1.03945912999005	0.980060956467642	0.962899180593194	0.992176126933389	0.998628904128782	0.954825331255512	0.970152590605041	0.946219694790638	0.977378551745972	1.03930508514103	0.976747628964962
Serine_(4TMS)_459464.91_TRUE	0.632732784873944	0.636236047597719	0.650348051201435	0.638392173765428	0.660614080026598	0.65658854300023	0.73167128752821	0.729179256632531	0.709973045532885	0.688608521398544	0.670126857821313	0.687283028222054	0.754585202079454	0.63780218411503	0.708850573995646	0.679277427602404	0.678387742538702	0.657558242680212	0.667978900151777	0.672258653235056	0.724778210771935
Shikimic_acid_(4TMS)_586124.94_TRUE	0.919243880398487	0.964869970055782	0.981998160860383	0.920426381651205	0.910193179398943	0.86249954983763	0.92927721609879	0.916298277996419	1.01798233111951	0.873904215232474	0.986640950625327	0.930048124397909	0.999208233176834	0.890174719257755	0.965377339519608	1.06175885934948	0.988214075461809	1.00018016174895	0.96291856501541	0.967433335975505	1.01027104065954
Siloxane_739483_PRED	0.66366159213387	0.629730960916464	0.666402331231753	0.66245936999726	0.738192421033811	0.665432491383791	0.768984291366385	0.712647996564132	0.716072471419858	0.66178162872866	0.745428425314986	0.751727443171553	0.726216245749798	0.726973830504949	0.682801472347577	0.703847835396472	0.667997495068044	0.696076913990106	0.725740982999365	0.733873582277373	0.679814200532614
similar_to_Asparagine_Derivate_505075.09_PRED	0.92983713832936	0.94073711763541	0.93361993458656	0.927849137657577	0.919890729901247	0.959968942786322	0.915738212739268	0.940084124838392	0.92232770360484	0.9688483479441	0.896811014806206	0.935940978662067	0.917850312157465	0.954880118185356	0.945134420332137	0.912082446738746	0.957751641060207	0.956777046008996	0.936010003806149	0.930552083142268	0.961927433572173
similar_to_Diethanolamine_(2TMS)_335362.44_PRED	0.752962920402502	0.760160297083173	0.739478615613283	0.74046713339352	0.739106411238018	0.765776357887299	0.743275167591897	0.740917875854899	0.710486785996213	0.742998129050563	0.804305405374838	0.745368942156968	0.721706123980258	0.751949207124843	0.753187062740808	0.702493758169874	0.711629195995034	0.696568932564544	0.728610132616216	0.803306005349119	0.729959226646274
similar_to_Lumichrome_(2MeOX)_367169.75_PRED	0.659064546119548	0.630245870882917	0.642924868594575	0.632740889498493	0.589369383959125	0.66615188049784	0.639627359513931	0.643306841202879	0.721739599096299	0.724318731198639	0.88020179993003	0.730170589554377	0.629486491683964	0.671738653001393	0.625400219566356	0.718408082009694	0.58046456533974	0.565340062594456	0.614729356076931	0.7548413921192	0.642656717577411
Sorbitol, U13C-	1.05705039047853	1.05280957572776	1.08230400259706	1.0683921374339	1.09155708173772	1.07059923219006	1.11111458868086	1.07822790620734	1.08399271087024	1.07162882665951	1.1108713367251	1.09087976345412	1.07537950417176	1.07213653602829	1.06283650446806	1.08627942288238	1.08867349079523	1.05983621157985	1.08298281577778	1.09062162055306	1.07539944526928
Succinate (2TMS) [MP-1.1]	1.02080572692166	0.961177569227322	0.96917511568897	0.991320712352203	0.933019726997799	0.996397357182104	0.993513279306905	0.999591667494377	0.98940975186841	1.07730818152409	1.00240043345438	1.00416370400436	0.979557918803339	1.01607793266778	1.04657456973302	0.936053620744968	1.00232577316495	0.999027377974893	0.997806427234898	1.01218401461451	1.04395285259882
Succinic_acid_(2TMS)_365265.25_TRUE	1.25199711332175	1.18928438541468	1.20493861339258	1.2201159991852	1.16071046671708	1.22468451683511	1.21481515766353	1.21931109169001	1.2106170009049	1.30470869456662	1.22257454040251	1.22320738565809	1.20078013749765	1.23693730981356	1.27448725881488	1.1707779777411	1.22923109236941	1.22590895614166	1.22226950763364	1.23205274710444	1.27525151724933
Tetradecan-1-ol,_n-_(1TMS)_592555.94_PRED	1.09348765315487	1.13668750568392	1.15893376591075	1.09297516535515	1.07461381520994	1.03877990990262	1.10314146224602	1.07649186496603	1.18648926820574	1.05024774105979	1.15056173314555	1.09559164141681	1.16454990488288	1.05374290333472	1.13826418186286	1.23380621032028	1.16121379381704	1.17030494088194	1.13128747187595	1.13680998196165	1.1836863219101
Tetradecenoic_acid_methyl_ester,_9-(Z)-,_n-_572839.69_PRED	0.777043595830011	0.776413556059942	0.782598710436381	0.777173919866162	0.766498495818827	0.816699996411876	0.761546020289842	0.800909789209569	0.758919077946166	0.806157493342905	0.8283721392692	0.783623267275889	0.755596762629056	0.812273338992661	0.788489248797633	0.740363932883092	0.791183382188089	0.79291425940015	0.778329503053461	0.830082652094985	0.772049873768471
Threonate (4TMS) [MP-1.1]	0.857899084301274	0.842618159895191	0.858899503190317	0.824051363335358	0.846362085842337	0.856908336843308	0.880350037183679	0.868159250916977	0.88970813512906	0.869803855688154	0.844022951334951	NA	0.918734747181021	0.811232303056806	0.874671289331836	0.867850298344457	0.86836673679765	0.832752027235491	0.842237356821017	NA	0.894198231286709
Threonic_acid_(4TMS)_458765.47_TRUE	0.787609943030819	0.77453836528768	0.784178883291463	0.728225017397751	0.7448885986414	0.779244390962011	0.776174662369024	0.749169625676829	0.819335082532164	0.785216103723089	0.737010505481094	0.741282246159897	0.822213455003081	0.734272939740918	0.746309070543895	0.789645384596849	0.782140226377475	0.748787579324942	0.75396801254048	0.7611096874652	0.790043363020179
Threonine (3TMS) [MP-1.1]	0.931412618352095	0.922420837123048	0.923622656511751	0.922249593826714	0.911658405019395	0.953594684902705	0.915110026007701	0.933008487918074	0.91663255347081	0.926117728089868	0.972637083398895	0.911938377197247	0.906283923428578	0.93401261465896	0.927134753970771	0.919499142440434	0.914159029599384	0.903665216582834	0.906776271163549	0.97928384472187	0.94069675354101
Threonine,_O-methyl-,_L-_(2TMS)_334293.72_PRED	0.696280917780744	0.712213615780099	0.682957497199272	0.697174456204557	0.711546851043702	0.733055413243907	0.681086056918932	0.70979410011392	0.66750500876702	0.704667128955697	0.759163411755761	0.717517443305944	0.683162304906667	0.713151535501286	0.723788916603784	0.65195164018896	0.669066182878308	0.664470327391699	0.697688484940827	0.766401948855665	0.68259554336227
Tridecan-1-ol,_n-_(1TMS)_547762.06_PRED	1.08965673270202	1.07394926089536	1.10523062991531	1.11245871780138	1.11374118564022	1.11114194473048	1.10195183166087	1.0845615365331	1.10837700271785	1.08335085476667	1.11481744292834	1.11549797760654	1.09727509089926	1.0857390571273	1.07467311994273	1.08187436951427	1.10549878026267	1.06053112823418	1.08746652241677	1.09840003266809	1.0811127780889
Tridecane,_n-_342778.75_PRED	1.17364031514422	1.11902302858133	1.17006448141663	1.14493581217417	1.1295052326055	1.18458657100989	1.13249785505457	1.13451344259238	1.14484806658469	1.15833167430079	1.19887297442156	1.10682182473753	1.12767808974414	1.12223756340381	1.11582153039818	1.18811286239827	1.13252738244426	1.14972083893224	1.13509606700742	1.20076181109621	1.12466928835199
Tridecanoic_acid_586610.62_PRED	1.07991264634285	1.12369858215308	1.14144469832448	1.07864433935761	1.0547591153883	1.02358393639813	1.08602623217056	1.05613986862561	1.17113349732903	1.03024122234534	1.13409225818951	1.0809580646801	1.15140994261098	1.03733377495024	1.12064223308465	1.21827369734788	1.14531896394426	1.15478936867645	1.11485111125862	1.12186089961991	1.17050892937692
Triethanolamine_(3TMS)_493189.91_PRED	0.987703315814084	0.995544518335108	0.976651089864558	0.995552786201356	0.955261983384492	1.01390270152796	0.985266900077497	0.984396835124417	0.938350381993371	1	0.791569490774308	0.991200417405859	0.941246670971402	0.995126028129926	0.99649514654087	0.897884618960575	0.974874579505884	0.976116082071339	0.981561223107783	0.77109085544579	0.996156190084148
Tropine_(1TMS)_336960.03_PRED	1.04075142206165	1.05101603536285	1.05529864236836	1.04346589214084	1.02335072453367	1.06492243584908	1.01397835176884	1.03200047775426	0.998084001351767	1.03753447841019	1.09174377132242	1.03640516300739	1.0120955678032	1.04328460542386	1.05740226733196	1.00307120151349	1.02428515044616	1.00289186001115	1.03091161833577	1.09373270144785	1.03405279964332
Tropinone_(1MEOX)_343648.91_PRED	1.06372662872041	1.00683464103015	1.05350508702205	1.02576777427642	1.01137550916232	1.07146081081523	1.02139466970642	1.02253225701543	1.03278791714463	1.04678645945877	1.09027906477772	0.995542638972413	1.01725868159164	1.01341510864159	1.00276287800029	1.07365247128233	1.01804295274896	1.03939007680315	1.02232670274608	1.09203415634858	1.00993524978535
Tryptophan (3TMS) [MP-1.1]	0.761369293515626	0.733397599412523	0.732678629804374	0.759565901638014	0.709039618374401	0.791452226123864	0.756921273948782	0.665128261880058	0.735406460704573	0.800168991755603	0.609202563476459	0.693140081278065	0.682818434166492	0.68876339355881	0.717356156482691	0.78807643567648	0.791460760069718	0.683091231022297	0.688608569863022	0.592535523212122	0.755340777567958
Turanose_(1MEOX)_(8TMS)_BP_876686.69_PRED	0.639781862791861	0.663638511098164	0.659131224229425	0.634051968332274	0.696340731234292	0.696591045995123	0.694294247691919	0.698121815829878	0.674272853142852	0.623795332591713	0.7123091975198	0.677847332947061	0.667072082001688	0.694306284650467	0.677248037940549	0.653477174504199	0.649020051923038	0.678081919749573	0.717778099994625	0.73188363108445	0.653399142359959
Tyrosine (3TMS) [MP-1.1]	0.861912781054588	0.811237693200718	0.828302236316176	0.830089723906194	0.810233277183412	0.901867571605045	0.837200715064734	0.828517777314866	0.87832510256878	0.864900155770027	0.856969219187429	0.809652401416874	0.816528580641155	0.839595330990613	0.830926733934147	0.857633463189819	0.831675600067522	0.804861319887697	0.7935811528481	0.845560548320737	0.858357023439804
Uracil (2TMS) [MP-1.1]	0.7247801524276	0.70800350533765	0.713727383616374	0.676097725330682	0.732901952427787	0.744707547365532	0.736344054343762	0.698031406297317	0.666253960164832	0.770453488766841	0.772543511173827	0.720097639059021	0.689160089396626	0.737465038140631	0.677547833881956	0.698748940176529	0.760585325649355	0.703911301679092	0.714580315594555	0.739818504590955	0.745389925933685
Urea (2TMS) [MP-1.1]	1.23708099483386	1.18423744033711	1.23081659243711	1.20650152132418	1.17622580530991	1.24763723959766	1.18405537669551	1.1872820808635	1.20349640233383	1.22655804849417	1.26356782133809	1.15861117471998	1.1825632992559	1.1817590361145	1.17764765808631	1.25058149685144	1.19071558817056	1.21130684855786	1.19269916309934	1.26510341806088	1.1900772563975
Valeric_acid,_3-hydroxy-3-methyl-_(1TMS)_235895.11_PRED	0.938002945737867	0.908007155868737	0.856814432461302	0.875983669797807	0.806328231432389	0.942678170318139	0.875929902605574	0.84518612534944	0.896248370209188	0.952311608117442	0.646358311140058	0.843993021214141	0.7906421372255	0.848252576575164	0.869386207351292	0.8416626027424	0.916160550350228	0.857042098980275	0.804503171527312	NA	0.895952567744514
Valine (2TMS) [MP-1.1]	0.93748895944363	0.893602159647338	0.911928287528653	0.89528608061261	0.911400602643956	0.953397117286975	0.905683324933788	0.916644677852968	0.924192803347374	0.953634068586678	0.960404415791083	0.881608615756008	0.918678998922797	0.907017003067428	0.921995264958507	0.934552521981842	0.934296707717948	0.923192287790666	0.911567873690148	0.96932581547568	0.932005532199536
Xylitol (5TMS) [MP-1.1]	0.658868579081612	0.691135610656713	0.633803659959626	0.652648937158043	0.701429462301437	0.705337918114342	0.663891271315577	0.681229134912156	0.668587373326022	0.74362942755903	0.710459788062775	0.653376392065219	0.626925463450256	0.682277405008526	0.687802499755679	0.689459559747164	0.699348991693028	0.693959423278644	0.745571489021781	0.743404479440109	0.658589915916635
Xylose (1MEOX;4TMS) [MP-1.2]	0.746677499314635	0.767385275567637	0.740232149764901	0.749528637317423	0.732155361362149	0.781539568665084	0.758084381671261	0.794153310138609	0.759366845442329	0.751651080814195	0.674600319721778	0.779241011327029	0.760508174438784	0.812497005686775	0.740508311993186	0.728789984590961	0.757723873268037	0.759629143560685	0.794440437840246	0.734854094151314	0.749328737024368
Xylulose_(1MEOX)_(4TMS)_MP_509094.19_TRUE	0.952589940898029	0.969692065299249	0.956527977447215	0.953243514880283	0.943666072360128	0.98346697267317	0.935135166829278	0.962720300713442	0.932675515392038	0.988154754566577	0.984534964009414	0.954077129623436	0.939527940348117	0.979924108424198	0.963612322606005	0.924936521418289	0.973948932749727	0.973337843846498	0.960050575307991	0.970422750718119	0.973764084636177

## Sheet: KD
Table includes multiple worksheets – one for each tissue
hum - humanized mice
wt - wild type
number - animal ID
Metabolites	hum_101_6._kid	hum_102_6._kid	hum_103_6._kid	hum_104_6._kid	hum_105_6._kid	hum_106_6._kid	hum_121_6._kid	hum_141_6._kid	hum_153_6._kid	hum_98_6._kid	Wt_132_6._kid	Wt_133_6._kid	Wt_134_6._kid	Wt_135_6._kid	Wt_142_6._kid	Wt_147_6._kid	Wt_148_6._kid	Wt_152_6._kid	Wt_91_6._kid	Wt_wt6_6._kid
1-Pyrroline-2-carboxylate	0.718755869992482	0.632137107676262	0.666826955884359	0.612941596346279	0.732426732935584	0.648899516131044	0.574233876502117	0.568145782685986	0.582550228333215	0.727924949385707	0.542344344252513	0.565945201548069	0.756441224736525	0.775418256923613	0.466273305455107	0.582320710245857	0.541415846989044	0.58595957872488	0.733736530409642	0.528314792849965
2-Piperidinecarboxylic_acid_(1MEOX)_(2TMS)_549118.94_TRUE	0.895717243226638	0.797539835354703	0.87469765853581	0.847991595302118	0.837668155451744	0.835302611792148	0.856930630056079	0.80749455126152	0.787178053051608	0.875634917894211	0.870757226492538	0.818058546197714	0.789183616969365	0.83650921715594	0.787235070688643	0.829542453187802	0.863582601546728	0.791866371186692	0.845032272906653	0.840997265260447
2-Piperidinecarboxylic_acid_(2TMS)_375026.84_TRUE	0.668440755194833	0.663719216469788	0.650057987552747	0.651150455036766	0.698781513841626	0.683066848106567	0.662413955119731	0.637558454383878	0.683724534458591	0.688424655961529	0.66553462094432	0.637730139404693	0.675748885415511	0.682075342614132	0.618319089055943	0.672516325221613	0.657516244497972	0.681087987757179	0.721821036701892	0.60982788961942
4-Hydroxyphenyl-beta-glucopyranoside_(5TMS)_872154.19_TRUE	0.609297824538398	0.60510887093634	0.607664706192048	0.650954340716405	0.603313406163783	0.561412498573656	0.554771462415671	0.539000407020652	0.683724534458591	0.563503265943263	0.555335415981821	0.548325798186557	0.585444416349293	0.585259340634219	0.718574609001224	0.613601401321945	0.628797497542208	0.76046285265172	0.681192479143612	0.723293908341786
Acetylsalicylic_acid_(1TMS)_479339.56_PRED	0.663346212502142	0.661035195677084	0.682445434321498	0.649371870529493	0.696956110388499	0.686649359341471	0.696445648007025	0.681276317709042	0.6776305733188	0.713707470520963	0.668993403076425	0.670627567275792	0.666829857896047	0.672950308876574	0.660074561538642	0.664262126833186	0.717157906012033	0.681693747807681	0.645789510994271	0.67727491618281
Aconitic_acid,_trans-_(3TMS)_600462.25_PRED	0.842083720250954	0.846999832021009	0.868997246260277	0.829827912617619	0.831658061516179	0.808854695934621	0.816835622786681	0.801017178567018	0.803241291825838	0.827747565690749	0.840365652412443	0.820349337277089	0.817284267573	0.816492204380837	0.842353400735363	0.805656376107712	0.808632977515581	0.823712954741271	0.814490431904032	0.847327747666702
Adenine (2TMS) [MP-1.1]	0.809769069609309	0.7771681217585	0.809260598018617	0.777059894067604	0.80168868844293	0.816119215141886	0.770459219844475	0.745500357188	0.775335551221945	0.80204220364133	0.769054762775137	0.766743515941063	0.787219350616983	0.775962049509865	0.773388287331589	0.7824039850631	0.78006514696105	0.786124142968887	0.796009596204864	0.762975657014918
Adenine_(1TMS)_586048_PRED	1.00255515625751	1.07903150913634	1.02869418236529	0.983544113820069	1.01216295618477	0.971160137925758	1.00702393427194	1.04620180331564	1.0385946601097	1.00873846157342	1.02290447670807	1.04729543175344	0.969710784519552	1.0103506795213	0.980383008580781	1.10672907377262	0.996857784749594	1.0054166598695	1.11714363618412	1.00112358450436
Adenine_(2TMS)_679386.88_TRUE	1.10173117961233	1.04904573329462	1.08949571963444	1.08326769227414	1.03935335723848	1.05630111452769	1.053911856365	1.07310725074519	1.0053025535728	1.0830525472451	1.08118195857399	1.05050284511155	1.02678251194278	1.04946909343954	1.01756686977906	1.01032067026916	1.08628322898112	1.04306306548839	1.08214537978937	1.06918800725738
Adenosine 5-P (|ADP|ATP) (5TMS) [MP-1.1]	0.658979860168599	0.616414955842969	0.658222277508552	0.630864851800024	0.634351303980544	0.673129661148767	0.667876673244561	0.656163045251006	0.694575551204651	0.672294791059201	0.654401612361136	0.62483083876955	0.669478486856189	0.627375914871823	0.63092495354527	0.632398968548869	0.682820445769881	0.629404960845461	0.693814046837527	0.629683131830334
Adipat, 2-Amino-	0.630801682369559	0.63615603966643	0.658409031559935	0.632520738629401	0.643933787169906	0.675738539377797	0.66703356068196	0.660561614641615	0.667964504219819	0.671990098839751	0.653086939400766	0.631374886741556	0.660769497715263	0.64536566127516	0.627425559625863	0.64095171973932	0.664739983823619	0.644283009775887	0.630742704650415	0.627568457050539
Adipic_acid,_2-amino-_(3TMS)_553368.06_TRUE	0.702656947253483	0.698494380999293	0.71823552402636	NA	0.707347781897036	0.720328307644546	NA	0.689933071687276	0.679615466953202	0.727580756624168	0.707023097609113	0.678085781396801	0.695697781883646	0.708861547862877	0.666555044429388	0.705431118330641	0.722671702580121	0.689962215535682	0.711111591892972	0.680823982336981
Agmatine [MP-1.2]	0.99067388182069	0.971142877513285	1.00089840860523	0.968208161836374	0.920830710751782	0.956082865842082	0.951309112454576	1.05624881696188	1.00915401675755	1.02178440546368	1.0069832721799	1.00692799274565	0.971122632417984	0.960811740882657	0.94899365607435	1.02443788271099	0.969300254515044	0.914795985183851	1.1205612869959	0.938554683627716
Agmatine_[-NH3]_(3TMS)_578698.75_PRED	1.13919972855849	1.11809901441966	1.15160741771636	1.09177991483525	1.09233808092921	1.11895744449975	1.10319218084389	1.09551396508216	1.13011323904456	1.10718197176533	1.11762313192547	1.09435566294482	1.11514947137252	1.12242043224926	1.12069083367665	1.10633252207816	1.12124575904806	1.1345457687199	1.12894527064694	1.15845891320472
Alanine (2TMS) [MP-1.1]	0.75142992889207	0.777487142920202	0.823457325192766	0.774540660553172	0.801070252942896	0.829289546276803	0.815159425156317	0.826709525983454	0.801835093323706	0.836689270221336	0.809547707746365	0.806630857410588	0.8409698361934	0.817739814915664	0.792643257129811	0.754624307601004	0.792294472662562	0.804622804183855	0.640231909979024	0.758041406337144
Alanine, beta- (2TMS) [MP-2.1]	0.81163423010719	0.79384722305995	0.808693888031533	0.790245329659223	0.794792757752776	0.832212655634584	0.776548948050629	0.785200640442479	0.793647167133681	0.799933476757683	0.78634359413957	0.75739125245428	0.789928904619444	0.785506141258965	0.785543195973395	0.789209130201241	0.796489046685653	0.80261840441957	0.847248653225468	0.806341978888933
Alanine,_beta-_(2TMS)_273369.53_TRUE	0.822659627146919	0.788711520346885	0.812259920848717	0.762542038943223	0.782576510571936	0.78311313976589	0.796347750804779	0.864077038534247	0.874196280066277	0.892030696203935	0.856704381068564	0.824913597494897	0.878164028398319	0.844406531235936	0.811962222418917	0.774751021644036	0.819433382116011	0.808073426318955	0.77855503468111	0.756744934724479
Alanine_(2TMS)_207563.2_TRUE	0.769649416274715	0.570417794418844	0.599426625983924	0.832906270547043	0.731737305430467	0.939603845744641	0.649005009663511	0.724372672853411	0.605620187068414	NA	0.641495787340877	0.780409962387278	0.770339239135657	0.663521103950476	0.735675929912764	NA	0.595445192406856	NA	0.680398977957549	0.801982491443226
Alanine_(3TMS)_355868.03_PRED	0.708004484899896	0.662768533392852	0.690688735663213	0.637110567973256	0.664545379488862	0.664183087369945	0.677860938871921	0.745689124139983	0.753613959417363	0.774570038196447	0.737355428882641	0.712312479782937	0.765808347630122	0.733305972196092	0.683935393553516	0.663197317058801	0.697934958594191	0.701683629516986	0.648730715790066	0.627923766759752
Allantoate	1.1676576775302	1.21592660956757	1.20346954822602	1.19122338690795	1.17269921453306	1.16342818929653	1.16457386278036	1.14049070674862	1.17357882899433	1.11917993975753	1.19661209735189	1.20309277400893	1.15112465184036	1.17461998966629	1.26631156908682	1.15179713126459	1.16831624983307	1.20489173368683	1.18367576564761	1.28471439452367
Allantoin (5TMS)	0.823485647134795	0.800953820800036	0.830348882960457	0.798701896144385	0.755778182561437	0.791255097753734	0.78425366082539	0.902159978617746	0.843065407562289	0.867410720308117	0.83956471294437	0.843851713774	0.819955952913482	0.792859773934968	0.776336525583169	0.864325134819838	0.805865904286856	0.755764838137162	0.964056699999247	0.762667297216814
Allantoin_(4TMS)_643191.62_PRED	0.850576533059435	0.877269340107982	0.851016453820545	0.846170279848106	0.94497984983929	0.89591425340915	0.84107325192647	0.770078727103985	0.92954422513503	0.824277164267987	0.842551678609911	0.791600201024317	0.877349577039753	0.862852639282311	0.911142115044533	0.920828627281081	0.907229611892498	0.902776962374035	0.905378730034998	0.883706467017739
Allose_(1MEOX)_(5TMS)_BP_588062.44_PRED	0.925997018217246	0.936373065398345	0.973426849897302	0.907547643207866	0.926741393608316	0.95639613908823	0.906822599011787	0.906538317368052	0.915264800361222	0.913621846165792	0.925454910673463	0.912441597838938	0.927515683042479	0.905345785448949	0.923497759550288	0.895751542471273	0.896378595940292	0.873315588431786	0.898832865260553	0.871836555376088
Allose_(1MEOX)_(5TMS)_MP_577900.56_PRED	0.713570216252173	0.871964425235315	0.66920763759192	0.563728716106308	0.574804311714465	0.614190317080869	0.60716464248569	0.841768420019318	0.726028757190512	0.696024880258821	0.659498682637599	0.837525355223017	0.5969144493904	0.592458802819866	0.571391928388683	0.892276870064775	0.627418561536699	0.583264982709417	0.921742385098004	0.549198115932643
Altrose_(1MEOX)_(5TMS)_BP_593442.75_PRED	0.535631000160588	0.645574967617406	0.728305080848957	0.627224492674074	0.617079741727494	0.6222444768294	0.655853290613635	0.602556027080125	0.686210757964347	0.741181456524317	0.704185104929994	0.559964216605225	0.589416394591275	0.743586530004162	0.61028172570697	0.715899657644443	0.705491284071823	0.595743002110052	0.371687839711278	0.567334458186008
Altrose_(1MEOX)_(5TMS)_MP_590452.62_PRED	0.80133566593715	0.879836053435943	0.954457413732688	0.950341698726962	0.927456558463102	0.942946631776267	0.923443903670347	0.928788416750985	0.846770969562826	0.905311974675899	0.930705848469531	0.904405765340073	0.923307204579364	0.899741834476282	0.881424389833203	0.884825801665083	0.909877596665023	0.878900500052584	0.784457148183098	0.931493530841802
Arabinose_(1MEOX)_(4TMS)_MP_498992.12_TRUE	1.08398973890702	1.05531789315295	1.06942264162238	1.04225270371259	1.05316383923648	1.06588098711184	1.06847593849141	1.04553746901219	1.03129048395631	1.09271721643169	1.0866147263314	1.02654499322694	1.04243503873895	1.08019132701503	1.03890381172456	1.05487142359889	1.05006184269415	1.02403192911925	1.08165614788801	1.01930463877239
Arginine [MP-1.1]	1.26094161647408	1.17161294494281	1.2476923849758	1.22000184644904	1.19451562872106	1.19183551836291	1.22343648140399	1.15907610400679	1.14753383539487	1.22670303780396	1.24279893731272	1.18466886394538	1.14263114889541	1.19967614559626	1.16982398902409	1.18235921011708	1.21906727105746	1.15326701231346	1.2118948535873	1.23409497055151
Arginine_[-NH3]_(2TMS)_582688.25_PRED	0.81776687102506	0.723156413377734	0.784531784578535	0.859523602859002	0.830098125893206	0.780905525162259	0.7405701494357	0.680265089255907	0.747017444474548	0.800532885273918	0.77408076535731	0.761565779002353	0.849018333724041	0.712985868918228	0.818919946431081	0.739958452738113	0.776681207382737	0.87899070537468	0.813812143470909	0.758041406337144
Ascorbate (4TMS) [MP-1.1]	0.727557435549243	0.676862961505394	0.717288848219828	0.714782073252583	0.718713473740631	0.715085904918487	0.72796943188119	0.723783846403174	0.70355344683519	0.736681327890102	0.709457451078241	0.679186328496467	0.715965088513817	0.693497413136087	0.696537916376773	0.687953511576786	0.73244841439322	0.699798608893749	0.773201053487188	0.71799532125136
Ascorbate, 1-Dehydro- (dimer;2MEOX) [MP-1.1]	0.848254530177812	0.950689183439668	0.947419773663063	0.967102460470372	0.931719423951913	0.860951224979346	0.995455558991268	0.99759606260855	0.958813512341166	0.965425919059228	0.930488589593714	1.00126737884138	1.00583996514046	0.967537609633471	0.99767669258273	0.952900266606763	0.969769580251262	0.990385190728338	0.8389493133982	1.05529889424948
Ascorbic_acid_(4TMS)_652392.44_TRUE	1.14025604385745	1.04989000593025	1.1286200408609	1.10144491223363	1.07659714012206	1.07457618922743	1.10780748423965	1.04715274559661	1.03242585147225	1.11400802563473	1.12265428457406	1.06605498305104	1.02843042062461	1.0807681601115	1.04592877399794	1.06581667256834	1.1027412428625	1.0346615831835	1.09188534085194	1.10997603236272
Asparagine (3TMS) [MP-1.1]	0.652499452328629	0.660646072883594	0.68288829355707	0.651736572932049	0.694099103350514	0.674380459992023	0.70386227990854	0.679522986799391	0.689473433880286	0.711495657792091	0.664185827615574	0.675706961156291	0.671205890170978	0.676568062509631	0.66474304761337	0.672516325221613	0.711580001414087	0.690101552177012	0.65938729805498	0.672669480286159
Asparagine (4TMS) [NN-5.1]	1.12847888007319	1.06239145112076	1.12173940353558	1.09037240340481	1.09093303336123	1.11753470170842	1.09233384337749	1.09581797137399	1.0993539940511	1.10628509448165	1.11221747527138	1.08770009616647	1.09171200075542	1.10288657113595	1.08408035553773	1.06616504835658	1.09559705150119	1.09028598068808	1.14725400782697	1.10003970398428
Asparagine (-H2O;2TMS) [NN-3.1]	0.983822504267744	0.922564903915649	0.968286606792526	0.94295125583067	0.947349715816682	0.978129342338317	0.944391641046619	0.960152723558628	0.960707329553043	0.968056203586587	0.9692537217081	0.951666995612297	0.949622139411203	0.964199825345634	0.931784470645193	0.925377682162979	0.950975984015598	0.939317198282499	1.0005953230487	0.943085417347997
Asparagine_(3TMS)_476136.78_PRED	1.12467863584698	1.06306446846183	1.11923147673983	1.08667935118937	1.08777294627802	1.1166706543999	1.08630868940129	1.09379058295584	1.09681586373558	1.10457860661755	1.11068269720977	1.08565148492151	1.09066344998786	1.10353016161719	1.08378579439872	1.06302860940395	1.09378267413905	1.09026833749162	1.14544494204626	1.099811782315
Asparagine_(3TMS)_550488.31_TRUE	0.731445534327952	0.69089765116602	0.694181196916231	0.685780593020159	0.729089619662833	0.697775432293184	0.70628186548051	0.727321434413254	0.685594884893465	0.700604119020756	0.676035731253347	0.651180456092592	NA	0.727507174157117	0.641356284784634	0.686798563913635	0.692905374574625	0.920373620330672	1.04450920196324	NA
Asparagine_(4TMS)_BP1_479623.44_TRUE	0.725856865189135	0.69089765116602	0.694181196916231	0.685780593020159	0.729089619662833	0.697775432293184	0.70628186548051	0.727321434413254	0.684101370357201	0.700604119020756	0.677686369347597	0.651180456092592	0.68595875373115	0.727507174157117	0.641356284784634	0.686798563913635	0.692905374574625	0.920373620330672	1.04450920196324	0.641575189079908
Asparagine_[-H2O]_(2TMS)_494442.75_TRUE	0.731526669890668	0.665780759303086	0.687215737688621	0.713718684259177	0.728297534699355	0.753419369127572	0.713922566046489	0.722535578599213	0.712182815430791	0.744811011558268	0.695169504605841	0.697087345147703	0.733256756568407	0.723365251819761	0.705808503865151	0.711547017392425	0.738057951694539	0.694730965835478	0.644286426333189	0.703763263477802
Aspartate (3TMS) [MP-1.1]	1.20025455473868	1.13096070592508	1.18218952447047	1.15617149852824	1.12283903052735	1.14099034315771	1.17824408213776	1.16782243737635	1.10722688731596	1.20935471089691	1.19240293150466	1.12647549097751	1.15211053030062	1.18947760009509	1.13927686560002	1.13442494835058	1.16238186311574	1.0966383994629	1.21021658426232	1.10328078422955
Aspartic_acid_(2TMS)_458076.97_TRUE	0.554770663457734	0.551738142168958	0.566737287914596	0.58695180493839	0.564931389284316	0.567373375235143	0.548574399199062	0.559260125965485	0.5944361780544	0.593655218341289	0.541230683473124	0.525177967245562	0.564947734481245	0.529584018325877	0.602004146643456	0.587313688138204	0.573569795477911	0.690795441813525	0.646717795790278	0.631070441410121
Aspartic_acid_(3TMS)_458039.69_TRUE	0.820581743444363	0.725067674283599	0.66937561020527	0.663333810789106	0.732120899795411	0.709115510593378	0.771215723385299	0.704511613563954	0.70580581483971	0.796143795175021	0.718356910581005	0.626907007048222	0.586595527033148	0.778590006678356	NA	0.818171828495952	0.798270347555303	NA	0.857892586043846	0.758577080458367
Aspartic_acid_(4TMS)_550990.62_TRUE	0.723339531631587	0.726218685265725	0.629052541801195	0.496628962420512	0.56250958907961	0.632569962403268	0.629729087095714	0.611014833719791	0.633469487430131	0.727062174893678	0.704300138575435	0.526407798443842	0.471009275183796	0.696676191535795	0.447278331994372	0.703841666050042	0.698716763689711	0.40345412384912	0.797869595621506	0.678173084814318
Benzoate (1TMS) [MP-1.1]	1.17884065220445	1.32246342381139	1.30398437826444	1.20363406797387	1.25973673050572	1.24957602448664	1.26137854921185	1.24124385875213	1.27182029746168	1.27760354106755	1.28376479027963	1.23539988057115	1.27691493492792	1.232470183312	1.18664507877171	1.27411985912134	1.23169050624496	1.23801840805017	1.08373325366491	1.27903386263932
Benzoic_acid,_(1TMS)_349981.84_PRED	0.770814535575499	0.785220794242372	0.812175420563795	0.740165555468944	0.772762564426204	0.797082698388537	0.75553748038904	0.806893529565245	0.823373679415267	0.813745711258479	0.803628015990332	0.77033545848262	0.798938525367321	0.814085290495681	0.75524965551786	0.808125846817024	0.783755862736714	0.774456114071807	0.774999693834207	0.740859529129047
Benzoic_acid,_3-hydroxy-_(2TMS)_507250.44_TRUE	0.715391599681429	0.687787476317379	0.676195180202633	0.669254999760239	0.710429605872693	0.68203574789709	0.654743706484171	0.642995545818911	0.706008120002529	0.66525190568822	0.659320921387642	0.646577568324048	0.710264646475376	0.701932789626681	0.639349529856761	0.708875048610107	0.716099637329372	0.668164785138266	0.708223249641183	0.578498641840327
Benzoic_acid,_4-amino-_(2TMS)_650574.94_TRUE	1.02629898613649	1.11999402070416	1.16877691354965	1.015007978068	1.06463932602042	1.19756903199698	1.13831511718917	1.21674674198171	1.21275350540123	1.24050199788969	1.15544661195511	1.12882575562383	1.20853513044429	1.02129462744796	1.13628633111832	1.08339032705004	1.10924334305385	1.07590545830056	0.958510410671625	0.970598047600239
beta-Galactopyranosyl-1,3-arabinose,_D-_(1MEOX)_(7TMS)_879025.31_PRED	0.79205164465603	0.78282711911596	0.807108155913434	0.794144062098611	0.795777924194594	0.792333223149556	0.798402488407614	0.749480201692392	0.769124421802371	0.787595791517157	0.798043797181342	0.754357508153244	0.775919956433552	0.795414080635575	0.755446102531103	0.790187246934871	0.806730575991915	0.776049257587603	0.683536544873988	0.780653816809547
Butanoate, 4-Amino- (3TMS) [MP-1.1]	0.876714505668363	0.920995923123647	0.905974255025707	0.895578056972311	0.880971290696094	0.875617144846711	0.873569955689106	0.864827414942052	0.883357090275396	0.841852033266612	0.901126271313737	0.912385887779062	0.868546890087551	0.882539391984805	0.960138238655611	0.869980842662088	0.87855050703138	0.906006019544686	0.893880776526319	0.969262935740189
Butanoic_acid,_2,4-diamino-_(4TMS)_519172.62_TRUE	0.617312981567927	0.657278674420927	0.950931978688582	1.14259475472059	1	0.916589393280059	0.921943708220219	1.0356257947758	0.878723253822362	0.750695769181196	0.87896572373386	0.942403645493856	1.20799198936794	0.820507829210718	1.13231641668163	0.6440802101179	0.652856415040739	1.16646730448351	0.8498964379514	0.74432489562237
Butanoic_acid,_2-oxo-_(1MEOX)_(1TMS)_MP_252911.77_PRED	0.921881986033866	0.953999058233317	0.949908654722577	0.933245809076148	0.922633397621545	0.91359782244759	0.916569565917749	0.890960411021273	0.924229008207509	0.887901396684539	0.937915916227205	0.937338234427464	0.902891073074591	0.919627835003823	0.981296803768528	0.909845995268774	0.9146910312838	0.950612947756833	0.923392023004388	0.990465999425367
Butanoic_acid,_3-hydroxy-_(2TMS)_249401.72_PRED	0.873158668858488	0.755282214721415	0.693119084083201	0.622679566204869	0.687419622465113	0.698949520175486	0.694958793350271	0.673867689156367	0.66513294001644	0.776466508912172	0.671236379188983	0.628493106181104	0.531445205598944	0.768335658593916	0.569744454687012	0.743488814494136	0.779022623038475	0.595743002110052	0.872378075639278	0.717840079130603
Butanoic_acid,_4-amino-_(3TMS)_452983.28_TRUE	0.588810191380338	0.58096246871876	0.602992255301189	0.673759010432888	0.603858069576517	0.562936295035606	0.519092052899804	0.513889059916132	0.70313850383444	0.566555211330553	0.508565798467783	0.5008422205156	0.608124854413225	0.575384758196978	0.760056110054896	0.616848980583955	0.600241398017721	0.792956973667996	0.717117473180688	0.759957625792279
Butyric_acid,_2,4-diamino-,_DL-_(3TMS)_438050.91_PRED	0.5847854517821	0.58096246871876	0.602992255301189	0.673759010432888	0.603858069576517	0.562936295035606	0.519092052899804	0.513889059916132	0.70313850383444	0.566555211330553	0.508565798467783	0.5008422205156	0.608124854413225	0.575384758196978	0.760056110054896	0.616848980583955	0.600241398017721	0.792956973667996	0.717117473180688	0.759957625792279
Butyro-1,4-lactam_(1TMS)_241244.02_PRED	0.904751022770549	0.898872930732736	0.897837658531193	0.866081626128562	0.94642134002113	0.897159509526015	0.900076809965704	0.879819097794119	0.886292924528188	0.892295620671151	0.907508384518719	0.847019157248196	0.871780772999257	0.901468677572604	0.85679823628291	0.880789980384476	NA	0.894613941861112	0.908309353494304	0.865378310936917
Caffeine_754467.62_TRUE	0.855813289934804	0.778564585855306	0.831512633700471	0.790601291159467	0.79931038557104	0.770273358148943	0.885611074780231	0.789500170249839	0.823182602861907	0.862779172578279	0.913457702181912	0.819001910220563	0.881992093293702	0.868659069358203	0.809795660906209	0.855550454278609	NA	0.799318844470678	0.898052777663354	0.810864758417562
Calystegine_A3_(1MEOX)_(3TMS)_BP_588253.69_PRED	0.981767360932787	0.983009761912416	0.924694993488409	1.03755047564562	1.03922782629471	1.07063769059845	1.01707669697737	1	1.00041809024995	0.994521296366085	0.812565712115975	1.00644128948223	1.05235707922685	1.05616311162702	1.02651754963948	0.994334023181168	1.04227480336014	1.02585902579277	0.996741361310017	1.06767868569541
Calystegine_B2_(1MEOX)_(3TMS)_BP_620736.44_PRED	0.666923661288343	0.673297926231679	0.665441582802147	0.663159542125579	0.685010301998126	0.710077599650878	0.67104486981366	0.645801945432255	0.704890421137564	0.674797476052617	0.671236379188983	0.639763568295336	0.682960721847258	0.678652446716142	0.67351185913051	0.684122829828249	0.680861946831401	0.669191883765204	0.671090862160849	0.689423241733756
Calystegine_B4_(1MEOX)_(3TMS)_598843.25_PRED	0.837427292286687	0.823316826079883	0.837308868634174	0.833711898758594	0.843596695381102	0.835377406634026	0.840392143992241	0.790486525626339	0.814675790549968	0.829880494808218	0.837975317155374	0.79790610985978	0.819211758705991	0.841274605435756	0.795654138694041	0.836083570389733	0.847135375623371	0.820276894284425	0.725125870891933	0.826082284593907
Caproic_acid,_2-oxo-_(1MEOX)_(1TMS)_326540.84_PRED	0.729973942677287	0.737455371731223	0.759558225254224	0.723209446306806	0.74320733042661	0.717701066406928	0.710679333417118	0.702474099915641	0.710842739234863	0.7046144882012	0.735588733890341	0.730807448102171	0.72001724704159	0.732096466170467	0.747293552369145	0.717231513795405	0.712856047579677	0.729482986921889	0.718405340316588	0.746495778057229
Caproic_acid,_6-amino-_(3TMS)_546902.25_TRUE	1.20266874728161	1.1238298753311	1.18282937238504	1.15640383114401	1.11291667504432	1.13437245984347	1.17781187801539	1.16798848013789	1.09756281608384	1.2104193634563	1.19284680492734	1.12501635709631	1.15132576153037	1.18798411552283	1.13412813126851	1.12564921183458	1.16374248237349	1.08814407563845	1.21166974811393	1.09629598024594
Cellobiitol_(9TMS)_870156.12_PRED	0.983350321432502	1.03003098726777	1.01649584323076	1.00688034307801	0.989028328045212	0.985967701776362	0.980838485022576	0.964632673011515	0.989511205062202	0.945359017231693	1.00911626451416	1.02035105861454	0.971524935854871	0.99175986490815	1.07509687235476	0.97269636003865	0.987425787413188	1.01972247202889	0.998257178542743	1.08830569505728
Cellobiose,_D-_(1MEOX)_(8TMS)_BP_872226.81_PRED	1.01356300289747	0.949394321662593	0.943344527965014	0.994765618244618	0.931719423951913	0.941876286075741	0.945245785868473	1.02115031836414	1.00710072376731	0.927884672767798	0.96346532840081	0.970070207090977	0.97183008095587	0.929968671649448	0.89430855606786	0.971470686781016	0.960045482000742	0.886531754906079	1.02784622025051	0.882514404599442
Cholesterol, D6-	0.710227397786274	0.689871179127123	0.702551278536015	0.67296899771416	0.695647496058437	0.730126925308062	0.679120529300283	0.708531955860945	0.686087881774945	0.705915386196591	0.68033163187065	0.649912430411294	0.693863673468101	0.676172416411928	0.668777862192966	0.68025188835719	0.689335058312858	0.696840031901993	0.797869595621506	0.676369278287757
Cholesterol_(1TMS)_1079629_TRUE	1.06383512974659	1.07453235470994	1.10275906659692	1.07235232166014	1.0972599379227	1.08046199422525	1.10243532149577	1.06285903747749	1.0906292384194	1.10935281774194	1.07761925956985	1.07986972226231	1.06074056211737	1.08715862847111	1.10115239813798	1.07886894753826	1.12149200652553	1.09772511235609	1.0492340990909	1.12081878735814
Cinnamaldehyde,_3,5-dimethoxy-4-hydroxy-,_trans-_(1MEOX)_(1TMS)_BP_790709.62_TRUE	0.628599721408276	0.676025111391566	0.760537146323861	0.745250609544508	0.732120899795411	0.740540135624783	0.735831261793892	0.743832821453368	0.670576117912462	0.733489268652675	0.744133958312	0.701908905303584	0.72675191570381	0.704960512804311	0.676828208153394	0.697597409014846	0.728766904621917	0.681087987757179	0.637030636162527	0.729608855767864
Cinnamic_acid,_2-methoxy-,_cis-_(1TMS)_527345_PRED	0.866604774369565	0.878850731970883	0.858657509092997	0.859887540350787	0.896143902692249	0.90999481468569	0.847477757859009	0.771823844117222	0.888461366581743	0.838820343183435	0.831192947695562	0.818058546197714	0.881504908861052	0.882470558706994	0.893226306350763	0.880381809305722	0.887499083871448	0.877400674689917	0.875200302219666	0.89301836500166
Cinnamic_acid,_3,5-dimethoxy-,_trans-_(1TMS)_753001.19_TRUE	0.826052730816579	0.830538850525882	0.808955831915111	0.81733161255175	0.85834322761791	0.870747315855742	0.816931482065021	0.745311222984906	0.838618893509859	0.801640210979354	0.799650890911872	0.775630016619274	0.838516196449205	0.841532884042648	0.848836259340579	0.838740934381971	0.83864458556255	0.831551401064671	0.825794301471543	0.836910394343819
Cinnamic_acid,_3-hydroxy-,_cis-_(2TMS)_599148.38_TRUE	0.949790234050125	1.07554781874818	1.0690801586882	0.975684025692248	1.02876400383632	1.02416251240286	1.03223435387117	1.02169771373734	1.03805817096905	1.05295613960221	1.05507944860546	1.0056789318954	1.04311182002824	1.00489722463417	0.947773570254246	1.04528236496867	1.00316544204837	1.00717415724619	0.851591187129099	1.03103482449741
Cinnamic_acid,_3-hydroxy-,_trans-_(2TMS)_653564.75_TRUE	0.7034077426555	0.649767943459727	0.664917252094996	0.668760565494014	0.697604132752072	0.672751356032034	0.68706129368897	0.689345668391209	0.674784889716378	0.699842980783342	0.696293971282522	0.65678459432331	0.702177667869623	0.71453540717514	0.639638515933762	0.672272281360798	0.68596499944262	0.722895914630436	0.693697600699111	0.664870008288593
Cinnamic_acid,_3-methoxy-,_cis-_(1TMS)_587950.5_TRUE	0.709424662700426	0.690165487347878	0.711531287948917	0.672012933859184	0.756262038529546	0.699628104097473	0.710953620535387	0.695698653710295	0.707013644634196	0.704103851142404	0.713741337322715	0.652610598641787	0.689278059936211	0.71800307516092	0.652155155796807	0.690427893836526	0.460069283238692	0.708549696807609	0.69947284353055	0.668106201342839
Citrate (4TMS) [MP-1.1]	0.669489446005859	0.657880862539184	0.655954557105629	0.63228580301353	0.705969432053262	0.659102059597026	0.663588837483425	0.65005456956048	0.659221360187774	0.666335982421647	0.667689428464995	0.613764986219941	0.650021838949645	0.692602650791343	0.616544531913463	0.658960287479102	0.660980622156663	0.643413100159281	0.664169027987478	0.603800135339572
Citric_acid_(4TMS)_594326.44_PRED	0.639162663131741	0.611228054466532	0.588295912017287	0.649571010723583	0.707543167012071	0.712909645720783	0.611904564221341	0.574930974173661	0.70355344683519	0.603593014575004	0.580352364846322	0.586541715790647	0.690796695859128	0.65245650610061	0.681618218794699	0.650514175806649	0.667436466146621	0.679865751363412	0.638443592346877	0.684261027505543
Creatinine_(3TMS)_489565_TRUE	0.963938166885899	0.893808253706821	0.952579056567797	0.926242172787142	0.926404414195461	0.958547468480519	0.926519212972451	0.93987476662304	0.932639477069482	0.949084802445799	0.946630898122572	0.922737125411133	0.930545708322534	0.941851105517084	0.913148443794502	0.901159370845878	0.93365018381287	0.923149633654817	0.985181604435416	0.924386477321785
Cysteine,_S-methyl-,_DL-_(1TMS)_354018_PRED	1.12829533951906	1.13698061651317	1.06106446491467	0.986669408205792	0.908696153923748	0.93879038552467	1.00164122595771	0.949379626552991	0.903600348684083	1.03150771425517	1.00926524296084	0.800856452660532	0.748549296057741	1.07136745015452	0.797128495061917	0.944394134597893	1.06127280990252	0.779104945916933	1.16127361116699	1.08871892831607
Cysteine_(3TMS)_479326.28_TRUE	1.32767133783483	1.21554048102383	1.14202137773505	1.0729637935202	1.13248963058141	1.14494731605322	1.14157744058554	1.09028613101293	1.09446432849522	1.20377310741299	1.11792634865904	1.07165211724108	0.99283313079321	1.21295427029401	1.02394925690615	1.18621037688908	1.22432411268932	0.999866779959599	1.33946002065575	1.20538481164657
Cystine_(4TMS)_791615.31_TRUE	1.2116446874352	1.21007360893817	1.20097153228385	1.16581843683154	1.23497123403779	1.18573499551522	1.19247100444367	1.15432558984351	1.18571125844649	1.17929320424617	1.20603725857834	1.15063605101615	1.16893175246387	1.2070519775672	1.16586193325698	1.1737029294401	1.17632861333917	1.20438593625422	1.21790437836598	1.17883376091817
Dehydroascorbic_acid_(2MEOX)_BP_639171.94_PRED	1.22294236145914	1.22592246230366	1.21863413441362	1.19295122581703	1.25562856058134	1.20519978000294	1.21142975920854	1.16824403558966	1.2091839325603	1.19692478835495	1.22875655295692	1.16937599173735	1.1856994257442	1.2237437070871	1.19344932302617	1.19260878788061	1.194218145447	1.22530030424433	1.22217489000804	1.20028494338458
Dehydroascorbic_acid_dimer_(2MEOX)_MP_625466.25_TRUE	1.24016233977027	1.2346922335919	1.23105917354428	1.20025117126318	1.26135169990791	1.21789638703893	1.22812142451823	1.18241070591671	1.21954661630718	1.20944431906467	1.24596990962619	1.18542530861449	1.19500747859803	1.23682246794049	1.20136001799956	1.20867520774018	1.20760274723993	1.22917399216836	1.23851853342096	1.20671887791347
Docosahexaenoic_acid,_4,7,10,13,16,19-(Z,Z,Z,Z,Z,Z)-_(1TMS)_907201.25_TRUE	1.21795910387279	1.21757315612106	1.20526703746999	1.17845906976459	1.24464794535517	1.19380055601263	1.20503705708782	1.1606923482153	1.1964960868274	1.18580505848253	1.22094359695702	1.16209710603394	1.17602184610426	1.21537754854686	1.18024321817235	1.18238264927544	1.18394676808308	1.20867623382178	1.2075296153675	1.18400751468937
Docosanoate (1TMS) [MP-1.1]	1.11155527128514	1.10737727800171	1.09490405274154	1.07266346797852	1.13744433387907	1.09132474954274	1.0999930386638	1.06014990513976	1.08736260053922	1.08832810741272	1.11296440575198	1.05515492640126	1.07234365891808	1.11025416724192	1.07137503123916	1.07244601398225	1.07545382187864	1.10258760966371	1.10217460762048	1.06713947103417
Docosanoate|Docosenoate, 13Z- (1TMS) [MP-1.1]	1.10887568570327	1.10328797723285	1.08966110374449	1.06937941881958	1.13956303597183	1.08911576068226	1.09470201613236	1.05485931329278	1.08718984600793	1.0806580273388	1.10912922371477	1.05095907398852	1.07291240841242	1.10026248274336	1.06258111911626	1.07705489481009	1.08010356484006	1.10179066407931	1.10110980313541	1.06876155679787
Docosanoic_acid_(1TMS)_904290.44_TRUE	1.08422716010471	1.08457560922611	1.07537790851415	1.04553657363468	1.11711090953254	1.06954116233471	1.07791808578334	1.03546321593804	1.06811041550848	1.06094868302184	1.09147008970117	1.03228123801516	1.05548203401108	1.08350958231433	1.04131288020913	1.05753044647126	1.06446386326122	1.07925529138104	1.0798279017548	1.04650202615385
Docosenoate, 13Z- (1TMS) [MP-1.1]	1.05988826700536	1.0600395232988	1.04378426791376	1.01975541825881	1.09456608013934	1.04829990645894	1.04896218167802	1.00817897174337	1.04595036184747	1.03871735431394	1.06065869710112	1.00516376938712	1.01910808160858	1.05382763483892	1.01495625842892	1.03531431214131	1.04200325034051	1.04811575851612	1.05386481271247	1.01654922088386
Dodecane_260776.19_PRED	1.03389455954178	1.0309979505051	1.01316373646337	0.99406042387237	1.066812186339	1.01737164200681	1.02162911185708	0.998092876285144	1.01470915329531	1.01616854846903	1.03822652186935	0.980449689974824	0.999530691341541	1.0279335779033	0.985269136588037	1.00721582106989	1.01836253088524	1.02394278959593	1.02154317312815	0.991867625654702
Dodecanoate (1TMS) [MP-1.1]	1.00715403896234	1.00410846209142	0.989925527359734	0.956934628744194	1.04482259664546	0.983849916424544	0.992730225692667	0.981154667519697	0.98438285938958	0.983404982948354	1.00552398920445	0.944855239633342	0.966245944029168	1.00061727644572	0.956414628944828	0.974792463295316	1.01509084155035	0.992595181973471	0.998677828243608	0.961587204562894
Dotriacontane,_n-_1074008.75_PRED	0.935299040975974	0.919255509193264	0.910487537938781	0.874434686638962	0.959914391203083	0.900584271967728	0.916414796346161	0.921588425706145	0.900581255568149	0.910565135983934	0.93014258681681	0.858859592063512	0.889969872573677	0.926574670724857	0.867819007930148	0.90202876437796	0.967347363328798	0.913737116801424	0.920254663063206	0.87587799067133
Epicatechin_[-O]_(4TMS)_963441.19_TRUE	1.17532309203183	1.17926984204976	1.16877961437625	1.13921393809222	1.20124311783465	1.15589794705992	1.16336406557594	1.12057804659975	1.15552506851299	1.14773167380872	1.17447362215768	1.11591583760869	1.1380614145651	1.17798292942087	1.12805682005191	1.14190393289318	1.14530430662782	1.17460945493665	1.18223349384144	1.14494441977934
Erythronic_acid-1,4-lactone_(2TMS)_462181.38_TRUE	0.803919803129041	0.913281705670111	0.719897426790676	0.703502723188561	0.721302383382714	0.721965015694405	0.648327880391218	0.935042360248451	0.813350051349319	0.766283155821928	0.737771642050023	0.925322378533303	0.795838552795895	0.700176003690313	0.713474840946507	NA	0.714532543104742	0.778927669689442	1.08201686225887	0.713239005104925
Ethanolamine [MP-1.1]	1.09682577143724	1.1449419744421	1.13156690543447	1.11966458930377	1.10480137986061	1.09461138553534	1.09497234861182	1.07720778236741	1.10345352390215	1.05325231116904	1.12593315706071	1.1353662779506	1.0848536474417	1.10538727295843	1.19142741255125	1.0866095791794	1.09920514309324	1.1317310088454	1.11499344357052	1.20675202107703
Ethanolamine_(3TMS)_321815.91_PRED	0.590764503543003	0.701832663355589	0.56628409203405	0.516470282141058	0.543711786152652	0.536233887535115	0.519701673382116	0.734297766832604	0.613957761863931	0.572102836936392	0.559638192587431	0.720756356331949	0.579787201907902	0.540248539247291	0.501772806789746	0.639604511840633	0.530026455628796	0.56309613244596	0.865844934759308	0.50357034572778
Fructose (|Sorbose) (1MEOX;5TMS) [MP-1.2]	0.853510815087183	0.896799180608564	0.893362067809493	0.882579726162641	0.863997852670498	0.854861695662983	0.861076734541067	0.855842435337409	0.866234404981399	0.828830027590748	0.878564114574932	0.89110216568641	0.852761703739912	0.86245483811018	0.936919370574899	0.855725199051411	0.863300622559623	0.887304428073382	0.884682948076722	0.946848696768036
Fructose_(1MEOX)_(5TMS)_BP_585803.75_TRUE	0.704998209065704	0.790132256806465	1.03760274604286	1.10149992110985	0.987192670815141	0.967201137698589	0.999781224599069	1.0702552494364	0.958022328755151	0.89601231991992	0.992914268656631	1.00810197233871	1.1546981863221	0.902179590251427	1.08704049347372	0.807404007381502	0.797037714860637	1.05956995370008	0.793548407162873	0.843426782879796
Fructose_(1MEOX)_(5TMS)_MP_580248.19_TRUE	0.756123962424855	0.723903841649619	0.778274494112538	0.782416893932061	0.79471022646451	0.780733676602042	0.773156490222529	0.774102980291038	0.734768539078679	0.767434775142808	0.767385754944503	0.764573502632472	0.780798338773289	0.768707106097451	0.756714320292092	0.736555239323533	0.751622347915154	0.774394348000394	0.701651154118226	0.735048304911953
Fucose_(1MEOX)_(4TMS)_MP_522432.03_TRUE	0.784234373459411	0.762438003248393	0.782750147627242	0.762940960850753	0.781922913783934	0.822496415773455	0.726571369563303	0.733872782769008	0.75530714051349	0.760023556267642	0.76688599595926	0.73681593533662	0.744590072315608	0.757102488249228	0.733048566551603	0.764155125551828	0.744731950360218	0.747054056203272	0.796774615856763	0.73209028201853
Fucose|Epifucose (1MEOX;4TMS) [MP-1.1]	0.785960701563206	0.792200115653528	0.778039675205968	0.741235556325357	0.784740390194877	0.79187258929884	0.752013818866207	0.767513932377319	0.780995625841487	0.77726317905727	0.781731505198312	0.767667798472983	0.730597854511932	0.783053870630261	0.704869504327069	0.849955053401958	0.775104431209725	0.727754011667337	0.803729713189298	0.766708663707049
Fumarate (2TMS) [MP-1.1]	0.704998209065704	NA	1.03760274604286	1.10149992110985	0.987192670815141	0.967201137698589	0.999781224599069	1.0702552494364	0.958022328755151	0.89601231991992	0.992914268656631	1.00810197233871	1.1546981863221	0.902179590251427	1.08704049347372	0.807404007381502	0.797037714860637	1.05956995370008	0.793548407162873	0.843426782879796
Fumaric_acid_(2TMS)_371909.34_TRUE	1.04301996899164	1.08089845659386	1.07187836090574	1.0598050527147	1.04476314922094	1.03505892507556	1.03387295730732	1.00768984687928	1.04456880528022	1.00720984282238	1.06103044740332	1.05941630859369	1.02294594980254	1.04123046654355	1.11077927639436	1.02740725798622	1.03462375329685	1.07066161149659	1.04939721209672	1.12387770237826
Galactaric_acid_(6TMS)_658294.38_TRUE	0.639363148602788	0.625803086638445	0.605510436366809	0.650560991064966	0.630667001570351	0.679351467615951	0.607674198532775	0.659193972628776	0.557561578438832	0.617359309654617	0.620447441204494	0.670329538583272	0.61609470402869	0.646079733592039	0.626451045254267	0.586161168164843	0.61519804923515	0.614656331887332	0.639440976783826	0.602911131796416
Galactitol_(6TMS)_590143.5_TRUE	0.691279844382324	0.625803086638445	0.645509927179458	0.616015695505609	0.726694540008978	0.657496687234856	0.625772035498456	0.642995545818911	0.681175914935732	0.684210511917958	0.626982139219612	0.628268023940674	0.652266185625311	0.623892755492455	0.636118257518559	0.672516325221613	0.674869234841041	0.624281148354037	0.732390886010931	0.572175358670109
Galactonic_acid_(6TMS)_626905.06_TRUE	1.2928927597987	1.22810128697233	1.27627170319911	1.25091767295982	1.22355971969474	1.23043203751464	1.26946129001399	1.25394122287889	1.20174374937428	1.29618693075456	1.28583412474619	1.21762765129466	1.24095864699334	1.28021212347505	1.23512022102535	1.22257276421376	1.2533213824836	1.19854747801802	1.30248336978212	1.20466182950404
Galactonic_acid-1,4-lactone_(4TMS)_619566.38_PRED	0.844280876774496	0.849267689882565	0.882249692520932	0.825321690523172	0.843188198252041	0.820116003829291	0.8201067184672	0.818192963644133	0.794496312198992	0.852686292798439	0.838601535611433	0.812058798458854	0.823542747057411	0.81871402196563	0.813115383482058	0.814279935670978	0.805229274909216	0.8016727632871	0.814881070048788	0.816533338344555
Galactono-1,4-lactone [MP-1.1]	0.996625051820786	0.833896663287429	0.849583243659975	1.07320079628369	0.960919709963218	1.17246015405821	0.851479267011227	0.944301211793426	0.82479540806781	0.858696452884778	0.84082491585166	1.01412259419272	1	0.879039066322429	0.985269136588037	0.785942771837226	0.833683891641605	0.811153180908281	0.889615630448867	1.05270349517041
Galactopyranoside,_1-O-methyl-,_alpha-_(4TMS)_585464.62_TRUE	0.961825377374552	0.998630512636194	0.990508724526953	0.978806743381385	0.964481610299684	0.954925743061371	0.954078231507784	0.929815344783228	0.965520756649418	0.927921376415875	0.984209538073328	0.98089212878202	0.945233406032782	0.962629182386785	1.03267798251684	0.946866090552381	0.959542592121696	0.991823230967193	0.965148438302387	1.04270654327282
Galactopyranoside,_1-O-methyl-,_beta-_(4TMS)_598177.19_TRUE	0.996625051820786	0.833896663287429	0.849583243659975	1.07320079628369	0.960919709963218	1.17246015405821	0.851479267011227	0.944301211793426	0.82479540806781	0.858696452884778	0.84082491585166	1.01412259419272	1	0.879039066322429	0.985269136588037	0.785942771837226	0.833683891641605	0.811153180908281	0.889615630448867	1.05270349517041
Galactose,_2-amino-2-deoxy-,_D-_(5TMS)_642472.56_PRED	1.44525708309263	1.37541090545267	1.43142601773436	1.40403000007402	1.35862982352564	1.37389807288196	1.42006135899638	1.39982093171155	1.34278340112286	1.44170074474248	1.43855185139275	1.36800509533851	1.38961449082443	1.42999154217812	1.39188187231468	1.36678573681902	1.40231241606753	1.338995819649	1.45451762889248	1.35804228118026
Galactose_(1MEOX)_(5TMS)_BP_588777.81_PRED	1.29370915091763	1.26488177126614	1.27896945729753	1.30161912602756	1.28766482506591	1.32385874503389	1.29193079891267	1.27265471423424	1.29594573739853	1.29629409359494	1.27444304870731	1.27887804993682	1.30517774337776	1.30324443143501	1.32051257273791	1.27833932255194	1.30988161143127	1.29770794314508	1.20341798070233	1.33643577099817
Galactose_(1MEOX)_(5TMS)_MP_587519.31_PRED	0.57622544751896	0.680148746423529	0.641194507210412	0.669254999760239	0.646283567728777	0.605431627541593	0.706472948649111	0.713842630482583	0.667226976227872	0.676560384916275	0.647454309411994	0.714852269774247	0.719566703444023	0.674708337444724	0.683935393553516	0.671166630093972	0.686845605284434	0.685692637040657	0.563768739868731	0.734115802205323
Galacturonic_acid_(1MEOX)_(5TMS)_MP_624653.5_TRUE	1.13295053089384	1.13774120919834	1.17550552005724	1.1106602889056	1.1209851966873	1.09334571296522	1.10215026532634	1.08698640280719	1.06451499341203	1.12607904774745	1.11873813455838	1.08067391997563	1.10061573256425	1.09622546559542	1.09254837024862	1.08798584113513	1.08173723376417	1.07900318272197	1.09036365722338	1.09511132784164
Glucaric_acid-1,4-lactone_(4TMS)_660551.44_TRUE	1.05041228509088	0.987415145581671	1.03228753249009	1.00922839353175	0.984095540230236	0.999715270435574	1.03221166964349	1.02035974487739	0.964416005884348	1.0587952479191	1.04102478102866	0.978631387976606	1.00593332259845	1.04269047165473	0.986644808537828	0.994681180353892	1.01693109923513	0.954994477885887	1.05794608808498	0.952539884354221
Glucoheptose_(1MEOX)_(6TMS)_MP_668728.75_PRED	0.808861525077312	0.704171850973127	0.777332006665465	0.746269444423466	0.734542097054936	0.761863499795567	0.787554765924984	0.793386930602569	0.727756381128998	0.831336321013563	0.807415038290085	0.761687805023669	0.756076785241454	0.801224475839542	0.705652573172842	0.751307282823928	0.781481128085054	0.667647396964125	0.81399107891837	0.71193477000416
Gluconate|Galactonate [MP-1.1]	0.709424662700426	0.630329014480676	0.627555333647233	0.679722047194229	0.679112121218958	0.674752674733618	0.660022331837148	0.68833035942642	0.662064514525142	0.751687755468392	0.645030371252394	0.629165390200802	0.663845778928624	0.658926396929104	0.602413130996288	0.669044118179746	0.674869234841041	0.64935462405559	0.696908790010938	0.657824766798334
Gluconic_acid,_2-oxo-_(1MEOX)_(5TMS)_BP_593592.06_TRUE	0.880056064606224	0.905533609160689	0.885942827942359	0.865124084564856	0.901735393801753	0.895176068183114	0.889900278469444	0.85120931442246	0.866359501065562	0.888596395651253	0.896640706874645	0.858387787411771	0.899638925511477	0.887392670712162	0.843957410270961	0.880123952677355	0.883671491189332	0.869557940167013	0.853452528611364	0.865977884827655
Gluconic_acid_(6TMS)_627052.12_TRUE	1.23218735206555	1.22155174815009	1.25190085163933	1.21802989943526	1.16558068891284	1.19393975006373	1.19152439171249	1.29781341715638	1.25271179809065	1.25812972909664	1.25372962320904	1.25618053715065	1.20900913312342	1.20266842443038	1.20937336515122	1.26692101229348	1.21025599463373	1.16304394658113	1.37287734099996	1.20062127298498
Gluconic_acid-1,4-lactone_(4TMS)_646839.44_PRED	0.662870195314317	0.695744765751453	0.740818313114493	0.673285728510459	0.737198518315009	0.734176874472789	0.696656278319148	0.596842078763419	0.784926750390349	0.720304506160122	0.731961762442731	0.543788395427268	0.66476348095644	0.71453540717514	0.631549131249888	0.726087263369524	0.64283122820448	0.718754202315481	0.51077178433595	0.725198099801534
Glucopyranose,_D-_(5TMS)_644536.81_PRED	0.901985378222237	0.985649158317114	0.941493993180532	0.94292803699571	0.970043553718744	0.98597878877754	0.915673380571901	0.872324045278672	1.02688393330142	0.863478860980534	0.934071670472189	0.93976395134525	0.933442331358595	0.948708058307526	0.937605022314804	1.03151236782799	0.974798227963381	0.97751877627057	0.956598300821845	0.986637664423343
Glucopyranose_[-H20]_(4TMS)_561007.94_TRUE	NA	NA	0.869362864246618	0.816899668303299	0.832229773816449	0.805048595343047	0.821825113242928	0.859988722296178	0.85316093520156	0.848097035593106	0.841616154036698	0.79644172117508	0.775748873977074	NA	0.786796276088226	0.851160482613328	0.821854137046348	0.796561576136636	0.981887135931556	0.785099427098232
Glucopyranoside, 1-O-methyl-, alpha- (4TMS)	0.814441454083343	0.695326010283932	0.659891061769986	0.655185084274617	0.604938689430399	0.711374825620764	0.651009550095148	0.595966262481891	0.661439545425758	0.702852465715192	0.681485846957431	0.660301873963141	0.588015950054035	0.647668212539776	0.570296426405645	0.666875431578091	0.704852395449833	0.59711701046048	0.920405674663222	0.719382630831148
Glucopyranoside,_1-O-methyl-,_alpha-_(4TMS)_613929.06_TRUE	0.906018374638125	1.21622913490309	1.29166911848144	1.30466281947071	1.29306984419919	1.28987561672282	1.26877413206553	1.24601862878055	1.25941994950476	1.24742527341666	1.23455769325184	1.27114470170744	1.30184659930933	1.26186396877593	1.29842889784434	1.20272846266989	1.23455785290596	1.30701627838491	0.978005077584401	1.29231280609962
Glucopyranoside,_1-O-methyl-,_beta-D-_(4TMS)_646436.88_PRED	0.930598851002646	0.925649331376125	0.919339772349574	0.950826840537065	0.966455635817652	0.952655688077279	0.9376813907099	0.840869336190293	0.922948111503243	0.910266438079898	0.948032304162337	0.920548725774687	0.91265207269952	0.945110753282449	0.939777187301928	0.925743559622107	0.934236046409527	0.947013872050856	0.916770255054793	0.957174725497242
Glucose (1MEOX;5TMS) [MP-1.1]	0.644822409252526	0.652753270819459	0.726966399872428	0.742051154236036	0.732579303974577	0.773606214408	0.702778998919335	0.725655672215568	0.6517444408115	0.702108771612104	0.727102624619067	0.704076178962086	0.722239883195137	0.695917990753725	0.672028108288612	0.675635699501893	0.707115669983039	0.692032865399161	0.641601431021661	0.723293908341786
Glucose (1MEOX;5TMS) [MP-1.2]	0.740673930849526	0.783008559420803	0.76856869652745	0.756436228367371	0.751316229078787	0.747845499766278	0.742190937429753	0.726175693989006	0.741541525546023	0.723352628824294	0.763770906194029	0.772332636959242	0.73246651460156	0.746925201112114	0.808546257213388	0.730679605810673	0.744362325330582	0.76670192220218	0.755844508608084	0.818831334179079
Glucose 6-P|Galactose 6-P (1MEOX;6TMS) [MP-1.1]	0.654418097701812	0.630589237153881	0.590835043264526	0.656122912326062	0.722404019465821	0.72188768054117	0.620092638073759	0.580502796190231	0.702093667888587	0.63267090702715	0.57996870474255	0.600468198414172	0.682960721847258	0.65444126245884	0.682975974632363	0.6639969887318	0.676583648049145	0.688417031580957	0.644286426333189	0.68962472621171
Glucose,_2-amino-2-deoxy-_(1MEOX)_(5TMS)_MP_608643.12_TRUE	0.83433864111017	0.796801089403191	0.829171905219716	0.81048733039257	0.807927818855186	0.785642323877309	0.801946887642701	0.803597791923449	0.753360699540098	0.824021430973872	0.830486111073392	0.770559306718547	0.77911588845272	0.800607987714564	0.7691543686824	0.763374372722404	0.847774867021956	0.795053757237932	0.829729427478886	0.785933931789121
Glucose,_2-amino-2-deoxy-_(4TMS)_BP_659366.94_PRED	0.747761892481329	1.15749282535398	0.884312992586734	0.719638341379351	0.694099103350514	0.736007766388288	0.697806949901578	1.10665093605756	0.984480582550232	0.879765498659137	0.870138530225594	1.11597651963748	0.801350836320113	0.739711632685607	0.755837921443323	1.16186849013233	0.74546713361912	0.745759360909356	1.17818583283931	0.695502177387384
Glucose,_2-amino-2-deoxy-_(5TMS)_MP_600525.75_TRUE	0.90469169098993	0.844144483028271	0.877636719971209	0.881005539376489	0.843290477060065	0.861432758570181	0.853499866245832	0.875476148331924	0.808199976642819	0.891945767880431	0.877242602065886	0.84833220281301	0.831969997862383	0.846368159454014	0.801305878467391	0.813156468573691	0.885316877704665	0.832719971796234	0.879930406590892	0.851504318156132
Glucose,_3-deoxy-,_D-_(1MEOX)_(4TMS)_589111.5_PRED	1.02488035975855	1.1814874725814	1.15229056416265	1.04676282864997	1.10536450952092	1.10133463061802	1.11054751678676	1.09823144857835	1.12242262691601	1.13721202352807	1.1302358377317	1.0844838771083	1.15118384392674	1.07664690369385	1.01942945240181	1.12968979388677	1.08076066259823	1.08119264496575	0.918974695265024	1.11650731540616
Glucose,_3-O-methyl-_(1MEOX)_(4TMS)_613285.81_PRED	0.749408445029866	0.754966566900419	0.742984468064664	0.740989615378679	0.783733261558623	0.796606746490846	0.7405701494357	0.683625492139607	0.765982375800403	0.729346129146244	0.723540413896712	0.702018368857962	0.759963933892573	0.756267438942845	0.773138906818103	0.757782709052829	0.778365492301871	0.757087271095607	0.73932091559994	0.763180746207866
Glucose,_3-O-methyl-_(1MEOX)_(4TMS)_618213.81_PRED	1.03898348641698	1.01519215300714	1.02247265725383	0.981989016251523	1.04428279531246	1.00164427145209	1.01139305312829	0.98244296211439	0.994505140861051	0.982378489304542	1.00605982478736	0.96008937012236	0.99501042081302	1.02863874311454	0.976635501010706	1.01996808756746	0.994533497516636	1.04589793671223	1.01870946609154	0.961105665690516
Glucose_(1MEOX)_(5TMS)_BP_599322.19_TRUE	0.71052680131769	0.727460038671933	0.793615829633488	0.773587355144408	0.740916629219007	0.755432135871953	0.763001795551925	0.764608353858509	0.75202062334417	0.802175833153929	0.773963904744905	0.744818566262198	0.757680700889438	0.754637268341904	0.726698575184119	0.719918788829318	0.768342618740426	0.720845727072654	0.605889405652539	0.756418390763865
Glucose_(1MEOX)_(5TMS)_MP_591351.81_TRUE	0.931549544575079	0.853937059832542	0.910536596807488	0.878738945813274	0.853977028295796	0.878542780567702	0.912193373629925	0.906781366121218	0.830706521022608	0.949514938616282	0.919024925035758	0.858859592063512	0.881697114659434	0.91948463385126	0.852673054705256	0.868336368483766	0.896729779552926	0.818837757484831	0.940453270826107	0.815651022980205
Glucose-6-phosphate_(1MEOX)_(6TMS)_MP_775879.88_PRED	1.09304030416185	1.27150973537232	1.23036787056804	1.12002246792915	1.1772920593907	1.1739918428598	1.18328430531288	1.17199652713174	1.19618236404672	1.2130819441311	1.20725637779697	1.15955730668936	1.24363690358084	1.15115714358896	1.09700788772343	1.20654223302478	1.15247843692379	1.15523338438385	0.989578481478269	1.19805611109883
Glucosyl	0.592364957592373	0.648242670395914	0.688897318781132	0.654048329762338	0.560028473623775	0.678877205494633	0.649341877698882	0.731064155544645	0.794242313338406	0.710678737602564	0.626248950225604	0.60280812333342	0.5969144493904	0.566414818898065	0.557444787342362	0.717153659931738	0.7553963529383	0.642094402987915	0.780112822890895	0.506854081819121
Glucuronate (1MEOX;5TMS) [MP-1.1]	0.797204658347413	0.729193752379731	0.767142116636987	0.735684729269493	0.726855985701701	0.755818854743222	0.775157313809764	0.773147977652822	0.707512698012648	0.816111910661022	0.779595032909045	0.72256143882072	0.75289705899446	0.779641397285797	0.712600820411287	0.732565724424938	0.765084023964037	0.704387804563241	0.793679437166303	0.679063906380884
Glucuronic_acid_(1MEOX)_(5TMS)_MP_619868.12_PRED	0.816963172922284	0.737828512660993	0.731116704058271	0.741480912857353	0.831428470141441	0.859158980585545	0.7851328984845	0.759345743385168	0.806636382471639	0.825356597724924	0.772373172130284	0.75852964441713	0.80896356624332	0.787152743959545	0.795045108151177	0.781182255711973	0.778716498423182	0.823866467331438	0.705769344468652	0.739721827588041
Glucuronic_acid-3,6-lactone_(1MEOX)_(3TMS)_MP_657311_TRUE	0.925259977190133	0.792089379713875	0.738174935422977	0.689360429061997	0.692526676982205	0.73614206625564	0.701784001872152	0.661013252851031	0.708108342876456	0.804393808972585	0.73859905709111	0.668826201326423	0.604367051270328	0.744734077226477	0.599516971405225	0.760642917821888	0.784750508255131	0.606879957591901	1.02921177244388	0.753993339908027
Glutamate (3TMS) [MP-1.1]	0.920226537867864	0.873703656523895	0.888036165083624	0.914946944045436	0.914957606319136	0.949002935430817	0.908781978232918	0.903694047952384	0.91273616759485	0.933129903502663	0.896070491995184	0.897616958274165	0.922015087016637	0.924436788570696	0.907609582028377	0.904139809050868	0.934772399207199	0.907506593038197	0.868307537127364	0.915904475157848
Glutamic_acid_(2TMS)_477506.88_PRED	0.690676249788014	1.04692646227622	1.03115627055609	0.914519769021017	1.01284111326196	0.986768346147325	1.02806280818132	0.989848856503255	1.06685660750735	0.775522891656674	1.02895669893988	0.985541233905053	1.09956460032942	1.05568538304421	1.01992351649316	1.05777101947153	1.04067919699841	1.14277185316646	0.462205586912653	0.992518089467901
Glutamic_acid_(3TMS)_509813.31_PRED	1.07970413648564	1.0428060879417	1.05357815792443	1.07715826833907	1.07113890252366	1.10897718928275	1.07326716423047	1.06220515731465	1.07550812220646	1.08797429047659	1.05810718186456	1.06038826882256	1.08569487334939	1.08340559550724	1.08518691585136	1.06371009235236	1.09349376241371	1.07210104196704	NA	1.09648337427138
Glutamine [MP-1.1]	0.925150780933035	0.85304446311493	0.91385090008054	0.881448736241138	0.894384389712573	0.918041414145499	0.882123756775114	0.904046075027499	0.89410125859868	0.912879468867422	0.904490315903279	0.884051154299675	0.892041519126252	0.90436608009623	0.871277009045995	0.866577358921092	0.896310919247379	0.887179520034361	0.942000948211695	0.878787013979931
Glutamine,_DL-_(3TMS)_599684.19_PRED	1.17788866623349	1.14150237047066	1.15294406015306	1.17079433700206	1.16652831603619	1.19733197915099	1.16609984660798	1.14728245126638	1.16960296870884	1.17590192617604	1.15213653783259	1.15173304042349	1.17359003998979	1.17803214728967	1.17999144593612	1.15584078960447	1.18399351534544	1.1660573747661	1.17614187745337	1.19253257340637
Glutamine,_N-acetyl-,_DL-_(3TMS)_655207.31_PRED	0.865062564311818	0.929540976498435	0.917445465239701	0.897578816674206	0.934758813853585	0.909091360042014	0.907345356051055	0.80626348880053	0.930568040353034	0.873180555860256	0.927001595667631	0.87600027009903	0.911454256835922	0.911795905220048	0.930427785036026	0.925512635397957	0.919186798351772	0.915353151256715	0.895177812203951	0.935376798871293
Glutamine,_N-acetyl-,_DL-_(4TMS)_633591_PRED	0.843904490374281	0.752081984466824	0.819083015535726	0.795798499658411	0.759527421292515	0.780000013766032	0.823245085325197	0.819657874167134	0.751440847317677	0.861029516978376	0.838539084794856	0.764751178490519	0.80341470616614	0.829291247210118	0.756228315556353	0.779696138243735	0.812863604647771	0.723704777316229	0.853670714442373	0.706037611648828
Glutaric_acid,_2-hydroxy-_(3TMS)_488906.25_TRUE	0.763437535907429	0.755439681743358	0.748522634991703	0.711667567138097	0.792075464754019	0.750903107765625	0.757743489762112	0.722055799958647	0.738358562058641	0.745051439155517	0.758880357436484	0.702889876860077	0.726821912167272	0.774421995621749	0.700375527820645	0.733825565255045	0.738713076785623	0.741521253051708	0.756034199076376	0.71564312766581
Glyceraldehyde_(1MEOX)_(2TMS)_MP_277992.03_PRED	0.77053833158869	0.753934075380644	0.771113175727974	0.767230296572587	0.781922913783934	0.769794906016905	0.779738729312787	0.735037047579527	0.752405310009249	0.764647652732168	0.772135404872301	0.736971418618282	0.7620978349014	0.774522064172777	0.730602942283775	0.775794469816538	0.78946280930569	0.760321426435031	0.660845539732085	0.75576235065177
Glyceraldehyde-3-phosphate_(1MEOX)_(3TMS)_BP_571519.81_TRUE	0.971938568946103	0.98820656288515	0.968846718642635	0.978247455508701	1.01045479466894	1.02054626568567	0.961287012383792	0.880103421515366	0.998745729250143	0.945677552149763	0.942388339814086	0.934539975558043	0.990765352548595	0.993199742011844	1.01977302595142	0.989393213496661	0.998944852650542	0.991412213469394	0.985001718380092	1.01220275245729
Glyceraldehyde-3-phosphate_(1MEOX)_(3TMS)_MP_577300.12_TRUE	1.44525708309263	1.37541090545267	1.43142601773436	1.40403000007402	1.35862982352564	1.37389807288196	1.42006135899638	1.39982093171155	1.34278340112286	1.44170074474248	1.43855185139275	1.36800509533851	1.38961449082443	1.42999154217812	1.39188187231468	1.36678573681902	1.40231241606753	1.338995819649	1.45451762889248	1.35804228118026
Glyceric_acid-3-phosphate_(4TMS)_606948.88_PRED	1.37487402924932	1.31014525137094	1.36135082341316	1.33461142357464	1.29682035585504	1.31273984460843	1.35285953900739	1.33339969469118	1.28044530975341	1.37535537675822	1.36995761722416	1.30298160380283	1.32340634656614	1.36297265345493	1.32425443685293	1.30561543446309	1.33435398239885	1.27635051152568	1.38367500377972	1.2908006107944
Glycerol ((3TMS)) [MP-1.1]	0.866755567382626	0.871031799014355	0.903379187049892	0.842397605382963	0.867257180208906	0.82984416517224	0.843335552289063	0.836189056088846	0.799124615820342	0.870662710540373	0.849996728743882	0.819591438215442	0.845914657114711	0.83550123809488	0.819245439139576	0.831984415570833	0.820420269600032	0.815316777906755	0.825091346997367	0.812440226462329
Glycerol 3-P (|Glycerol 1-P) [MP-1.1]	0.820615595953115	0.782584707523961	0.75310884985252	0.67655403049739	0.737052752605339	0.762070927791076	0.763545395373781	0.753041587107732	0.753170339300386	0.803738962667412	0.79050936626117	0.755917916955606	0.683069363391232	0.766023509592568	0.656927419804006	0.774751021644036	0.804283647002189	0.662326429936561	0.832569190516465	0.73818616412623
Glycerol_(3TMS)_292962.19_PRED	0.894363477742178	0.868369928647194	0.886542310145405	0.86801845494316	0.869708520332393	0.906318785054937	0.866827515764771	0.838029954681996	0.879476825913391	0.868888919668367	0.851989512154451	0.829156609981065	0.880388725378388	0.875836972543165	0.862955872542345	0.881331621805146	0.872794611761761	0.893149407693418	0.892484331050108	0.907416325168785
Glycerol-2-phosphate_(4TMS)_556161.06_TRUE	0.979420736221243	0.961836701710614	0.976342603149684	0.960980431229083	0.969765257315278	0.993133891756088	0.951813699067031	0.932557127969286	0.980476077615359	0.969181974214734	0.949212424136872	0.916133425862383	0.970173505014359	0.965238608159817	0.963779308416946	0.970653285749014	0.965789651228728	0.987241668539184	0.992982710592193	1.01219234263754
Glycerol-3-phosphate_(4TMS)_574746.69_TRUE	0.879011615570565	0.914335752533807	0.900140602322619	0.887063539950707	0.884008563384395	0.877566126015983	0.872157317831918	0.858964935719712	0.878149744346207	0.842683552539017	0.898035056422236	0.90570800510911	0.862106181949579	0.879960859946799	0.951408819032215	0.86996402696375	0.876327360193025	0.900695110269379	0.888795639006985	0.960102566833623
Glycerophosphoglycerol_(5TMS)_761775.38_PRED	0.741339044816185	0.723049200080197	0.738863583636142	0.711667567138097	0.678593924944643	0.697380992074869	0.697390040701467	0.810372471508677	0.762682188964573	0.782337567322141	0.742480682478165	0.753105041462095	0.718126381916264	0.703558837946836	0.675389894124646	0.775274110910753	0.726653417842792	0.660860170700663	0.869309378078086	0.665625403196677
Glycine (2TMS) [MP-2.1]	0.937074726530765	0.898373363226099	0.855284438090779	0.768306859956959	0.813462408663933	0.869797328923076	0.849625468116252	0.819789959716973	0.876409523838257	0.899886428183168	0.880701991328954	0.809380903301089	0.736800545732783	0.890381568149838	0.769757264642663	0.903840954377276	0.913705705973759	0.761447474005926	0.924666230701309	0.943594765382284
Glycine (3TMS) [MP-1.1]	0.972382548930889	0.951619828715477	0.948206834944414	0.93016529860939	0.967525924427815	0.925256064412099	0.919858219774016	0.882128684272386	0.968528760196877	0.918285670371495	0.914404226012313	0.892770257828878	0.967726099264072	0.948232744046463	0.925790916139111	0.965415893355194	0.969990444229109	0.925061134523598	0.972358728672827	0.854998810353125
Glycine,_N-acetyl-_(1TMS)_334790.31_PRED	0.659966450086148	0.736327885797242	0.795022030977412	0.643634052303331	0.694543921411992	0.837033439148414	0.767270729858233	0.876868036450885	0.852661414269165	0.900111309410756	0.79065862388514	0.766975372382999	0.856521701528224	0.65245650610061	0.75011480775303	0.721943439401216	0.742430560110907	0.689822691487918	0.536675321385657	0.580161305117427
Glycine_(2TMS)_226792.3_TRUE	0.794135431475084	0.796695126565222	0.815543700857882	0.795943214690691	0.825207720080175	0.818742547510592	0.830507460564045	0.806541209920971	0.815469884222712	0.849091755603171	0.80686428063668	0.808459575454527	0.79746946166177	0.822270399413688	0.811730096354903	0.812560045213186	0.850528285744585	0.821028465222496	0.782964899194173	0.82475172165532
Glycine_(3TMS)_326251.06_TRUE	0.868357362602937	0.847652830079669	0.844265361049431	0.825719866562592	0.870844174811462	0.828785088861543	0.81970358454304	0.788715931217789	0.859774587451334	0.818331506450209	0.812646065176826	0.791326908345199	0.868614292334277	0.847614628395979	0.815665580889861	0.867908101361699	0.869310146715366	0.825653426435338	0.872619622628077	0.743468836969582
Glycylglycine_(3TMS)_628479.25_TRUE	0.82886938298355	0.832513800701777	0.781904334919995	0.90472903419024	0.958120431482572	0.977147368040501	0.814474525309354	0.793905104495971	0.940114514115832	0.780352807755634	NA	0.823025417413272	0.877673081504521	0.861039455518367	0.895646204356747	0.882034364537499	0.891924094691499	0.922009420795521	0.838162744015868	0.93648816375884
Glycylglycine_(4TMS)_591933.56_TRUE	0.554770663457734	0.551738142168958	0.566737287914596	0.58695180493839	0.580433935002182	0.567373375235143	0.548574399199062	0.559260125965485	0.5944361780544	0.593655218341289	0.541230683473124	0.525177967245562	0.564947734481245	0.529584018325877	0.602004146643456	0.587313688138204	0.573569795477911	0.690795441813525	0.646717795790278	0.631070441410121
Guanosine_(5TMS)_960132.88_TRUE	0.5847854517821	0.58096246871876	0.602992255301189	0.673759010432888	0.603858069576517	0.562936295035606	0.519092052899804	NA	0.70313850383444	0.566555211330553	0.508565798467783	0.5008422205156	0.608124854413225	0.575384758196978	0.760056110054896	0.616848980583955	0.600241398017721	0.792956973667996	0.717117473180688	0.759957625792279
Guanosine-5-monophosphate_(6TMS)_1065235.12_TRUE	0.789236007602514	1.22461525337255	0.945722773562995	0.776304726672115	0.729247296193874	0.796386311449131	0.757800896240397	1.17123455722131	1.04760058738012	0.939946888775357	0.930935388938137	1.18399346096734	0.866503309577253	0.801339650512831	0.811904237938554	1.22995681112042	0.800796479343538	0.805953066632366	1.24547686992629	0.739084597394986
Gulose_(1MEOX)_(5TMS)_BP_593076.44_TRUE	1.05465038768122	1.17538299006051	1.01984930476035	0.955361474013326	0.980406757722416	0.957889298832929	0.978180178337416	1.12302446013253	1.05660816395308	1.02092429650476	1.02038573111442	1.13449717619571	0.951052905441795	0.994175053434214	0.954771823812405	1.18180090422854	0.985315511782489	0.972159711719103	1.21549844568795	0.977383085618086
Gulose_(1MEOX)_(5TMS)_MP_584150.19_TRUE	0.844227192292386	0.824216810377852	0.83421241805589	0.803829042357129	0.81766244435048	0.810305548600836	0.813156950164196	0.81359061952219	0.817073541408631	0.803291137648502	0.83488295311663	0.815607355480302	0.775362860275184	0.823449185210315	NA	0.825920631895967	0.812582890023967	0.775622735519994	0.906451572836093	0.781868676109007
Heptacosanoic_acid,_n-_(1TMS)_1053682.38_PRED	0.725599315167933	0.644897261353989	0.643374694966815	0.67655403049739	0.70213081559839	0.688177305736568	0.670364544357455	0.637558454383878	0.661282700362688	0.691219558489189	0.66553462094432	0.68477721694085	0.678059197069663	0.662920393990782	0.674559265124041	0.692443976039975	0.700358111815349	0.692169450163954	0.727994571493174	0.638077295332751
Heptanoic_acid,_n-_(1TMS)_255612.95_PRED	NA	0.653382035099963	0.696273290159941	0.692820299307779	0.660899751311145	0.672117655715386	0.679619995086983	0.700618088029464	0.621430341165419	0.727753005123208	0.704300138575435	0.658809283937006	0.651672622227162	0.672813802677705	NA	0.629627004965408	0.712771481707731	0.634763416079375	0.695201112145901	0.659695527659982
Hexacosane,_n-_908082.69_PRED	0.74692853501384	0.790357792456444	0.780076508652722	0.799915018153175	0.76712268685934	0.767416883690222	0.823484804791375	0.82885733837025	0.800926386760143	0.804810610613922	0.773612525374803	0.819764182806806	0.834517051877404	0.810714440613773	0.812655604351986	0.784684813601938	0.806598034431894	0.815898166776128	0.753410668729255	0.86521786548724
Hexadecanoate (1TMS) [MP-1.1]	0.667987992811099	0.67102844428409	0.724925360584832	0.683370983743043	0.695427740764581	0.696487782419752	0.658957901195336	0.719002315599576	0.704788199530391	0.731522553588003	0.710220107477195	0.681620014085756	0.732862419557246	0.679166904398578	0.645807005545789	0.712775269487828	0.733966144479971	0.707259575880312	0.465544644640892	0.599280717979766
Hexadecanoate|Hexadecenoate, 9Z- (1TMS) [MP-1.1]	0.84430770841807	0.817357035343181	0.826077217921571	0.805775622278528	0.82968974638529	0.888393114069479	0.816707668574397	0.854096012028629	0.844935088439874	0.832458116066106	0.809919520289217	0.787847541005023	0.836559945603932	0.818228090494076	0.83117787713518	0.816288101324108	0.841376076916299	0.839862938200939	0.858356197757205	0.852456228031549
Hexadecanoic_acid_(1TMS)_697328.75_TRUE	0.917920154203991	0.850857969432185	0.907652052016628	0.874749760602014	0.878960561998841	0.908696519423564	0.885076096080873	0.896980280147951	0.890156795503978	0.90792442626943	0.902259869919097	0.883719622867099	0.887185481149933	0.896302334154045	0.862377510131954	0.861783814294447	0.887602525333115	0.876434824932203	0.937402638471676	0.878645167878119
Hexadecenoate, 9Z- (1TMS) [MP-1.1]	0.762961981323021	0.668888860655076	0.668194039678225	0.70467607852687	0.744027635724246	0.723117936196741	0.698429101202121	0.661350609868792	0.694235705405692	0.728153736998987	0.696169634974382	0.710918266336634	0.709101044324345	0.682820518969609	0.698223324032891	0.725444318248676	0.736267408637645	0.711649955295484	0.762992485589692	0.653983984329933
Hexadecenoic_acid,_9-(Z)-_(1TMS)_696619.5_TRUE	0.814800422162577	0.82805574874536	0.806974908938036	0.82144158229541	0.852190505276864	0.870220657803789	0.812658389359547	0.740259959576964	0.843144002039178	0.793610618700676	0.789105766285313	0.778875743805308	0.838812027896912	0.835965610419039	0.850306384047315	0.832720152248638	0.842332177538902	0.831835902069526	0.81948933181233	0.839736515717003
Hexadecenoic_acid,_n-_(1TMS)_703311.62_PRED	0.980124041061929	0.948691335724257	0.967761088199206	0.964695147950314	0.972042244250541	0.935404581705532	0.940074949647186	0.878901237854714	0.913012944136441	0.9639772751744	0.919481491406586	0.876575676012982	0.955845026481855	0.969224576146052	0.952322243823767	0.96264049569225	0.977030601597931	0.946720947832178	1.00740030520634	0.92267107449271
Hexadecenoic_acid_methyl_ester,_9-(Z)-,_n-_652277.12_PRED	0.684820638050748	0.791700877037821	0.773104681209113	0.755370644517723	0.880688999602278	0.835526829012271	0.838938969831129	0.728115493259858	0.854948462594285	0.830840197808264	0.825963805731344	0.771505222906905	0.84491522782394	0.821424419581123	0.84809357815817	0.81842596453677	0.85159187897539	0.840714043941037	0.547022502785315	0.693189120609363
Hexanoic_acid,_2-ethyl-_(1TMS)_254181.88_PRED	0.722012656122062	0.610914772824664	0.753407494885534	0.730456675386185	0.68065099360447	0.69598809217672	0.711681428076452	0.703643617175022	0.649124592400605	0.747141982998246	0.723444987656643	0.658306864113771	0.712471047022308	0.681324639560296	0.675182838587404	0.690121933901153	0.720267238428184	0.695129695783935	0.759083479581623	0.713562637822358
Hippuric_acid_(1TMS)_692751.69_TRUE	0.999574733617355	0.96538744274978	0.981181241653719	0.956416298792075	0.974814855383395	0.981732672526624	0.984895668332302	0.965737064072181	0.952429498249359	1.01305995677992	1	0.940146772001098	0.960303104224781	0.995823050526211	0.950599163231421	0.972894191164206	0.96693344427134	0.94106658398746	1.00072683372981	0.929153354254441
Histamine_(3TMS)_653726.19_TRUE	1.08990301187283	1.08848223623593	1.08254221558246	1.11212755334994	1.12129297381675	1.1087316649806	1.09888223410689	0.995029666532636	1.08280477596043	1.06491488097912	1.11167904419494	1.08169487595817	1.07016920021029	1.10155338808155	1.10703369241576	1.08317461010002	1.09398422949601	1.10718239773617	1.07572301667475	1.12847909592799
Histidine (3TMS) [MP-1.1]	NA	0.691334499255888	0.664037424428393	0.602816368285569	0.723743637673076	0.67768163419431	0.69366667046603	0.672275597078116	0.722911453268166	0.539347572693511	0.697283295753771	0.651180456092592	0.746100497483521	0.741529155696658	0.663825450037775	0.725587553714923	0.709153661728527	0.769394812045591	0.742616741683739	NA
Histidine (4TMS) [MP-3.1]	1.01857342671838	1.02599434241	0.997304774184323	0.961670252215203	1.05458333907397	1.00085418869328	1.00213148915944	0.990713401332096	1.00783807829272	0.96986173553393	0.990320530215317	0.962692447596699	0.98037773642371	1.03587233191659	0.982095985683145	1.00586973927132	0.982777900212092	1.07616856828072	0.980739368842307	0.946791774214634
Histidine_(3TMS)_678782.75_TRUE	0.715010845441743	0.686273256345274	0.658222277508552	0.749795912854396	0.748554595329384	0.789576480461783	0.741248644816341	0.735822944743361	0.721533217925398	0.727292996779276	0.60171790263601	0.722829468965118	0.762636449254827	0.7808230512747	0.721710374830416	0.712612374243483	0.761143307998949	0.740925800168627	0.718587998907174	0.766012164023744
Homocysteine_(2TMS)_506276.72_PRED	0.750424197330214	0.741398456640541	0.75407631374491	0.749795912854396	0.748293830318631	NA	0.757743489762112	0.710920649737573	0.733234413861817	0.749188575203241	0.762993448776999	0.712213522184615	0.740649739396253	0.754271414939551	0.716620048280603	0.758916168850263	0.763158626173726	0.741944493597505	0.650882178991099	0.730026373196599
Homoserine_(2TMS)_380616.94_PRED	0.813864463060744	0.725801601481166	0.703037453576555	0.626480762025468	0.674620586244968	0.739766481695121	0.712313981138215	0.700693012849917	0.776553642683972	0.77664025353199	0.720343715056598	0.656954860842648	0.612189498985929	0.741251652216134	0.690780529358017	0.771372819720242	0.7843786726356	0.713555480441344	0.847222856610523	0.862288675936544
Homoserine_(4TMS)_510930.09_TRUE	0.717739626760072	0.720332475274701	0.757428847415523	0.714358030937386	0.788846792814973	0.800986841252437	0.768103261722884	0.750202992752273	0.806673892041097	0.730969117847036	0.756553063076812	0.726164968380261	0.786106825465552	0.746925201112114	0.792086634948212	0.742164386148799	0.738647756751114	0.839401741634921	0.675084791193905	0.782213304020883
Homoserine_lactone_(2TMS)_458933.88_PRED	0.831762122163923	0.867619817276452	0.861531267527738	0.847436856511542	0.843698562811247	0.827553147769186	0.825441054170675	0.815149069365965	0.838124830684976	0.79673868449243	0.852481742222475	0.863641269939178	0.821102644648476	0.833258902220608	0.905641412096215	0.823189176995451	0.842471332369391	0.858414072005566	0.842550717188278	0.915727910833152
Hypotaurine_(3TMS)_509415.53_TRUE	0.747415487699614	0.738385737177992	0.750764676811627	0.725904022744576	0.68573913356427	0.72977000406829	0.716028212202228	0.829794693593588	0.767703254309703	0.794423801940447	0.767945100855196	0.774560601340669	0.743056381392072	0.728220826921567	0.696367911174531	0.789812183033637	0.73719983277149	0.67831742241289	0.881821390833271	0.689019150994533
Hypoxanthine_(2TMS)_659841.12_TRUE	1.32725725924747	1.33688043488312	1.33610469657285	1.37653009711305	1.36244717192171	1.35517740325658	1.34540706105847	1.21941284680671	1.32749526057455	1.29245940223349	1.35593962727021	1.33458526199107	1.31750018441248	1.3475597787673	1.38186583787539	1.32592125577064	1.3387383364427	1.36651478376303	1.31887312342863	1.41778608156772
Idose_(1MEOX)_(5TMS)_BP_601382.12_PRED	1.20529650609944	1.31446289976146	1.37146876804558	1.2038244667552	1.24929868634203	1.39739785270212	1.32872670074364	1.43598409227215	1.41931868939741	1.45289185822246	1.3477923253973	1.32792552897133	1.42064412323763	1.20684056823815	1.34511548767293	1.26904369483612	1.29707642688167	1.26650335806901	NA	1.1688520002559
Idose_(1MEOX)_(5TMS)_MP_590632.88_TRUE	0.738045321862515	0.832964305241449	0.836175285783213	0.858318695402049	0.819002981315759	0.751768042801316	0.887278747176497	0.889575255686693	0.848325702100698	0.856779743615339	0.824219898710758	0.892533621431218	0.894214328251863	0.855148748345804	0.878906145787699	0.845477782023693	0.861744947713968	0.874616890993359	0.722613508693142	0.932103385479468
Indole-3-acetaldehyde_(1MEOX)_(1TMS)_BP_657093_PRED	0.795703205152653	0.710890695095283	0.772300245604523	0.739999951329788	0.745245772453699	0.782396757885986	0.758144650858676	0.771967866291306	0.757521678709652	0.772382326249934	0.76556247515606	0.751837015780797	0.757320778082748	0.761405393747747	0.728982879717938	0.730339011467224	0.752365821212273	0.744035175280766	0.809457959706923	0.737280257173441
Indole-3-acetic_acid,_1H-_(1TMS)_668169.31_PRED	0.675283438548761	0.490326573903647	0.553745855520312	0.709797168954818	0.643567395628609	0.828758467980281	0.568404565405168	0.618273050485562	0.564713483782859	0.588996478484986	0.57644990506084	0.660794592963332	0.660224653865079	0.562834980255206	0.631859864499468	NA	0.562827196304678	0.523144717619465	NA	0.683198557329232
Indole-3-butanoic_acid,_1H-_(1TMS)_755498.5_PRED	0.835952918570893	0.831530992050493	0.836976748101173	0.835895502875758	0.846162844346327	0.867327852113059	0.818358548047378	0.79729076121366	0.863742338859329	0.827129474188041	0.838320208302885	0.801766363306058	0.84183326097944	0.831422865686584	0.847553983975209	0.841082454023462	0.837798258396819	0.854663828363893	0.839785378332287	0.87073556376079
Indole-3-ethanol,_1H-_(2TMS)_652683.19_PRED	0.850576533059435	0.831416993840295	0.855228673364916	0.822974070337306	0.780887236865994	0.815665123024254	0.80465212192957	0.907542575917747	0.862710856528199	0.882448377042067	0.866370069200381	0.856043887341333	0.834160553232432	0.81964692563052	0.800921081414648	0.880063183478668	0.830470210735039	0.774146915291853	0.961266603907465	0.78375077420557
Inosine_(4TMS)_904803.88_TRUE	0.805187716298166	0.709800465905922	0.778917513975784	0.741480912857353	0.732579303974577	0.748973550815122	0.779368653215642	0.790842733474249	0.688637567777808	0.83397255199344	0.78551074377138	0.727452182849034	0.752086004019854	0.790922099601831	0.709935236957275	0.728826416186522	0.76618204289402	0.67401768940453	0.813919542465166	0.689019150994533
Inositol, myo- (6TMS) [MP-1.1]	0.716431400184414	0.660646072883594	0.695754215923105	0.674230132886563	0.696739178505302	0.709115510593378	0.68717692909746	0.693868109372423	0.692172396460061	0.746386969347319	0.681485846957431	0.677531025929825	0.709017407221423	0.706636857626039	0.646621357840695	0.671659545151846	0.683729007730135	0.655946430738979	0.698365961578733	0.641261800865742
Inositol,_myo-_(6TMS)_654785.31_TRUE	1.0084277162855	0.965766449269203	0.990802861765862	0.967898663112765	0.975149202719031	1.01331554248303	0.956501471248923	0.963700996663515	0.978644322029673	0.982050742594664	0.958352439052325	0.943004026067743	0.976401231725075	0.960390109074863	0.982842066735015	0.972564254183764	0.979497969241432	0.981588386729893	1.0232475357861	1.01602786828419
Isobutanoic_acid,_2-amino-_(2TMS)_228564.16_TRUE	0.806867016346407	0.78093355087041	0.800794096740951	0.769869925812776	0.796185599395622	0.829527616137836	0.792067453245061	0.776123284846105	0.785851685364307	0.809702534828157	0.825751845535599	0.789903120404171	0.787638112318888	0.790453194723524	0.778733014884183	0.766175975843388	0.786589259507713	0.779281919711133	0.799983833578013	0.809801639988019
Isocitrate (4TMS) [MP-1.1]	0.849842279780885	0.851706760750271	0.783366048890034	0.685500010894704	0.760689213276783	0.796239084845058	0.789333762091832	0.740955419515938	0.773999253545527	0.871661980583023	0.758812652788114	0.758466732393767	0.73146980993091	0.80387831818386	0.652667606711466	0.820436061883997	0.856545583969893	0.640758726416851	0.738573794589393	0.792075452898828
Isocitric_acid_(4TMS)_597989.19_TRUE	1.03334159215012	1.13513768153725	1.18673644017116	1.02710150626311	1.0787431995129	1.21796809336121	1.15313299388745	1.24783686058832	1.23525905833537	1.2685925494549	1.1707690751526	1.14881914950062	1.23504415479981	1.03534149322633	1.15661530234942	1.09800666932362	1.12468919746894	1.08857541145272	0.952396865040549	0.980282039821363
Isoleucine (2TMS) [MP-1.1]	0.846484213889303	0.821535060900039	0.838298886628087	0.821704841993807	0.836636339582833	0.861201911265186	0.824497305619788	0.807394638663079	0.844393311384349	0.839841433035594	0.814910169916017	0.778099899522885	0.843516296839748	0.832922438760251	0.817056611788182	0.834295861982796	0.829788612972014	0.854206840339057	0.853136543686541	0.864936515891782
Isoleucine_(2TMS)_318827.91_TRUE	0.810069797937029	0.809359683608328	0.830206929417426	0.789427065575952	0.758941490505081	0.783322869141291	0.782381937939905	0.89301218634564	0.832205004758744	0.857296588814061	0.842371271175381	0.835267036962476	0.80331739066873	0.795414080635575	0.776900510249406	0.853329966107163	0.800197406113982	0.744200623663324	0.949631769010071	0.765612155018385
Leucine (2TMS) [MP-1.1]	0.801580730548359	0.835955436291343	0.857135412075641	0.840160292627071	0.764431257011277	0.773790722169249	0.816033233613442	0.789919846910298	0.710842739234863	0.820854975318229	0.812404817715773	0.696742303394903	0.778784264615202	0.805511522141959	0.671170951936666	0.76862252481828	0.813453653515008	0.809051237545462	NA	0.809868389808846
Leucine_(2TMS)_306195.44_TRUE	1.23538730704513	1.20597163607216	1.21980401715355	1.23571263480211	1.23185299221048	1.2591596130414	1.23093906072863	1.20995403284966	1.23026718846592	1.23514935988192	1.21542394640068	1.21403563350682	1.23838562602461	1.23918846918689	1.2506226182649	1.21569386210033	1.24572025822766	1.23219571238815	NA	1.26169276414277
Levulinic_acid,_5-amino-_(1MEOX)_(3TMS)_BP_591715.44_TRUE	1.12763450922456	1.09575267053938	1.10898790274787	1.12945600578597	1.12570175314921	1.15579011881772	1.12469955068754	1.10825526617201	1.1273760228432	1.13429244298906	1.1070369343462	1.10859758118041	1.13499354339871	1.13698056293816	1.13873125518464	1.11278297685811	1.14119296998141	1.12615941565379	1.07342367553091	1.15087164409703
Levulinic_acid,_5-amino-_(1MEOX)_(3TMS)_MP_574704.06_TRUE	0.844227192292386	0.824216810377852	0.83421241805589	0.803829042357129	0.81766244435048	0.810305548600836	0.813156950164196	0.81359061952219	0.817073541408631	0.826090519986785	0.83488295311663	0.815607355480302	0.775362860275184	0.823449185210315	0.765285183710793	0.825920631895967	0.812582890023967	0.787276473459255	0.906451572836093	0.781868676109007
Lysine (3TMS) [MP-1.1]	0.856814880874241	0.835481109812033	0.755911794151131	0.800285437056737	0.871407263443024	0.815056447482321	0.784297805163378	0.792137774662359	0.831414444828906	0.780152087922375	0.76800706333453	0.815894586776902	0.847925393651589	0.827766035732694	0.825095606406295	0.818988402515821	0.84953970436914	0.781324609613828	0.842469651398977	0.782813791012888
Lysine_(4TMS)_616386.69_TRUE	0.793076692448461	0.754887505716713	0.773902915943958	0.720942199464699	0.739502689299074	0.773282505932389	0.74352198421355	0.747834001401658	0.779242077387497	0.769062028051636	0.764990004668178	0.73927568700232	0.770248803193769	0.763990814279333	0.740857763373431	0.754034254470902	0.77215538231923	0.762976098119486	0.77991315197016	0.763895531994656
Lyxose_(1MEOX)_(4TMS)_MP_498323.69_TRUE	1.03313134907876	1.02061473900142	1.04571667249711	1.01229807757162	0.976681365410728	0.999269646653333	0.999342245445935	1.08391149432345	1.04685284640956	1.05910663076873	1.0477602518002	1.0439916310633	1.0131239305851	1.00419634972791	0.997151208410438	1.06187989586326	1.01206742483005	0.963218595127466	1.14971775474497	0.989687985682929
Malate (3TMS) [MP-1.1]	0.761642651003091	0.784030811568845	0.761988392605825	0.742375598049343	0.840307970009024	0.798820728577562	0.740909967482997	0.696483916055297	0.830854412643548	0.73113547918284	0.751807056711444	0.699694615553182	0.783130859806547	0.775120406788765	0.806492069088828	0.829011301553419	0.805665300209054	0.797554749006545	0.808292432401278	0.770125870578941
Maleimide,_N-ethyl-_235945.08_PRED	1.04917551094174	0.95450359198025	1.03183245566357	1.00466938404576	0.98241368222041	0.98389520411253	1.01552727602106	0.959365511459319	0.938938554645464	1.02649583052117	1.03215294689693	0.974068170570202	0.936137440341013	0.986786266353548	0.948685876611518	0.977304837115754	1.01119393348863	0.940594660232431	1.0004407239188	1.00823837592426
Malic_acid,_3-isopropyl-,_threo-_(3TMS)_475906.09_TRUE	0.643484755939449	0.680632821494649	0.658595449420225	0.686617793487522	0.657758192582884	0.663076029851263	0.703075594574961	0.721392214107494	0.681690781225573	0.695066555033505	0.655515273140525	0.706617590435882	0.718887042339686	0.686823722458838	0.696027091006448	0.678774944790195	0.699492514086754	0.697360665937737	0.639837211279662	0.732362537983504
Malic_acid_(3TMS)_442513.44_TRUE	1.01722447732576	0.97672083831286	0.987450478936218	1.01053361972547	1.01334319112289	1.04487023823211	1.00883249471102	0.998082332173737	1.01115660291221	1.02520215377306	0.996501196924813	0.996197863475858	1.01734235119636	1.01772975986044	1.01484244333845	1.00060484185538	1.02626564233386	1.00458037052298	0.951400041093249	1.02125696923724
Malonic_acid_(2TMS)_300994.53_PRED	0.76030602265382	0.698900652474075	0.724137116296165	0.684653660593554	0.68065099360447	0.716809783095414	0.68809727192511	0.678116088876915	0.671289804322164	0.730133019796171	0.692367999919262	0.689708101812332	0.685429968817761	0.667916266088287	0.703445423954855	0.68868157226865	0.727606361364957	0.683638389440454	0.831219606291669	0.678619406460638
Maltose_(1MEOX)_(8TMS)_BP_880335.56_TRUE	0.757201433502577	0.686273256345274	0.70672986071379	0.675476050370119	0.657118018883958	0.710251536649501	0.685192872090906	0.658618393980399	0.662685661159646	0.711834028256649	0.680910355970237	0.671663868102351	0.671815628544089	0.659239285373372	0.691672955633826	0.685309009902331	0.711494350900642	0.674666042226772	0.81948933181233	0.665625403196677
Maltose_(1MEOX)_(8TMS)_MP_871061_TRUE	0.669041327353913	0.611851813628383	0.639640596694322	0.657421723899416	0.64770295558111	0.660110427278608	0.63720597994145	0.645273602013707	0.636519481160702	0.61372645958494	0.619141813856053	0.625295872624793	0.652856231590082	0.637933382022157	0.612904920219951	0.647896632783724	0.674992670801664	0.663412681892004	0.60643985097631	0.611077260828302
Mannitol_(6TMS)_583180.75_TRUE	0.9709750904373	0.958183632510037	0.974181207515283	0.948444072059667	0.955554290793996	0.990725907676724	0.934614770276487	0.933299125533976	0.956515606764156	0.953053825656353	0.944296767383293	0.911546567539587	0.952543195396938	0.938046519732084	0.95407983232757	0.950154782668444	0.952223425658781	0.961125908503167	1.0072289066606	0.981171497174332
Mannitol|Sorbitol (6TMS) [MP-1.1]	0.716525403721892	0.635909335067076	0.707196851779947	0.683943030406384	0.69184523617917	0.707788501974186	0.684956867578935	0.701439102081609	0.69205652975251	0.702257965640759	0.698141228531354	0.678362032592952	0.683286291505737	0.691472959030071	0.648231761977955	0.665053336282767	0.692491882679431	0.67547082604497	0.738798507009264	0.656195275111277
Mannopyranoside,_1-O-methyl-,_alpha-_(4TMS)_559825.75_TRUE	0.950056811641018	0.894870023692221	0.945873974377697	0.939900115219925	0.877930953851034	0.904008951760007	0.904261518064408	0.86282752598638	0.853279507495417	0.898704634189875	0.889637599316513	0.875281430827689	0.848689651881784	0.898058831330827	0.868915909046049	0.8947729481267	0.908424476192135	0.821852862519197	0.891637178462805	0.978509401085834
Mannose_(1MEOX)_(5TMS)_BP_587272.38_PRED	0.92132895046688	0.932645566802264	0.981247337136049	0.948938190845813	0.955393840973925	0.963635024126035	0.915276523020518	0.969435761250379	0.971339118361538	0.983238808564739	0.965452416773911	0.942362109479173	0.989272372280489	0.942090180055743	0.920839624222322	0.97844991472619	0.997253981328098	0.968391834472455	0.643526481485778	0.893978135878329
Mannose_(1MEOX)_(5TMS)_MP_587842.81_TRUE	0.902865281912479	0.891843861566983	0.892100013926275	0.921851275667295	0.928288267617676	0.92498131257436	0.914853900668344	0.809789034200238	0.892905047381949	0.881554396565122	0.921231816433412	0.895288279485188	0.891064876098647	0.909159224234405	0.910147942913809	0.898049017082607	0.911274961106113	0.914652228901723	0.892946454993049	0.929687626769717
Mannose-1-phosphate_(6TMS)_785522.56_PRED	0.702549237968058	1.07903150913634	0.805902715476078	0.667597594051792	0.649102731228503	0.681110219966013	0.650179159540364	1.03270126940665	0.907467906374764	0.815275093892384	0.805323556329098	1.04047806076554	0.74529003980406	0.677485266608132	0.689699732349659	1.08597784416942	0.698911265244747	0.696578731728888	1.0993873835324	0.633456503384005
Melezitose_(11TMS)_1053876.5_TRUE	0.682223126094123	0.68596776095428	0.694181196916231	0.674854970851632	0.719756990099138	0.646957206135436	0.643812171522509	0.622715983038589	0.683975913691275	0.6381505528221	0.66586907779263	0.652610598641787	0.657032590682657	0.691472959030071	0.601593598293119	0.702135955389763	0.66623202354656	0.692985203624866	0.708525871370432	0.642199272904003
Methionine (2TMS) [MP-1.1]	0.630146073491637	0.608052145830509	0.572026357055853	0.657973394803711	0.690005328158656	0.716972425478604	0.657882120736408	0.661462802552596	0.646978938826866	0.653567563398916	0.494590502418263	0.641559651373616	0.680651430852996	0.706636857626039	0.633705610754533	0.628116493229055	0.680861946831401	0.637573595520583	0.648730715790066	0.66410933700545
Methionine_(1TMS)_416320.09_PRED	1.00042526638264	0.964049986915259	0.97906890666244	1	1.00165687284095	1.03462325176073	1	0.99237504301411	1.00230950396598	1.01475608777586	0.982594491241296	0.987147786815153	1.01376114277638	1.01066164545289	1.00967447040621	0.988039065463849	1.01865436289834	0.998051404822146	0.917030562295078	1.0181773261392
Methionine_(2TMS)_474948.12_TRUE	0.656301300067941	0.663149845309832	0.643590210327486	0.675321130373121	0.715336255987344	0.691793814440063	0.67172063846772	0.638130308678276	0.657280718498198	0.680553778363214	0.680186441404349	0.665438794554958	0.657454796114586	0.681575493049586	0.661024640861067	0.682261422929082	0.684853242532067	0.668850646240812	NA	0.683198557329232
Mevalonic_acid-1,5-lactone_(1TMS)_454636.47_TRUE	0.736125362496006	0.689131760971685	0.700210254659394	0.656681547549657	0.732426732935584	0.714421307549151	0.651009550095148	0.702474099915641	0.708700514572632	0.723891297128797	0.691199602303277	0.674568039943986	0.671572181075199	0.659551209599025	0.657661914774616	0.724218435355114	0.72120485777995	0.683490089037965	0.760181082103112	0.611902282420109
myo-Inositol-1-phosphate_(7TMS)_788938.62_PRED	0.617312981567927	0.657278674420927	0.950931978688582	1.14259475472059	1	NA	0.921943708220219	1.0356257947758	0.878723253822362	0.750695769181196	0.87896572373386	0.942403645493856	1.20799198936794	0.820507829210718	1.13231641668163	0.6440802101179	0.652856415040739	1.16646730448351	0.8498964379514	0.74432489562237
Nicotianamine_(4TMS)_902113.62_PRED	0.48225287647298	0.455172173570174	0.575823099382797	0.731181268946675	0.596538259207993	0.467281399200212	0.521508740487231	0.635530050997071	0.499853091194353	0.534458725320605	0.505443965052994	0.563849137041483	0.863605381642262	0.523798481909079	0.70004721483456	0.477790977578077	0.476559182045029	0.834673365888692	0.550409156745759	0.381683420123404
Nicotinamide (1TMS) [MP-1.1]	1.03020215629598	1.11831886817007	1.07920337352018	1.03456353789428	1.06775601816549	1.02564713567085	1.05686573336945	1.08190365984451	1.08663885871817	1.05584060484929	1.07646582199287	1.0858935948083	1.0205431564288	1.05938559086385	1.03487361463739	1.14372076093609	1.04384228659617	1.06108878821192	1.14098640411949	1.0553129081897
Nicotinamide (2TMS) [MP-2.1]	0.648915714992374	0.621356485818298	0.623975294882735	0.620065397243105	0.769585878461508	0.688932628433443	0.66532589989566	0.698954961236066	0.669278705770018	0.710951806742744	0.646249469726543	0.626219632365337	0.687839459563019	NA	0.712161127252866	0.733429438108583	0.739558383653324	0.669871009685825	0.752825611752851	0.650580509546738
Nicotinamide_(1TMS)_515482.47_TRUE	1.0032402967923	0.965461246218712	0.987349301504207	0.989710259606038	0.92831035332754	0.988745100222237	0.96095808749614	0.933340182034788	0.972883687763734	0.93424358336646	0.998912750924375	0.975399336206919	0.941642333545932	0.953333784489389	0.931003125441828	0.932361760415822	0.959930758129223	0.960778109353615	0.922126400667186	0.995640686462387
Nicotinamide_(2TMS)_455050_TRUE	1.22360470754197	1.19485706997092	1.21914934943953	1.21555263336631	1.14893144506872	1.20722532178874	1.18194313075701	1.14966415091014	1.19218943685348	1.14506236225359	1.22070836637893	1.19901204070415	1.15960852434706	1.17687525697145	1.16490282251581	1.15161979850685	1.17810752749486	1.18618120097206	1.15350030539333	1.2383225608053
Nonacosane,_n-_992849.81_PRED	0.641346612513008	0.627957376348035	0.615012119839345	0.609186485846074	0.648405260998558	0.650331930005663	0.60868565445118	0.656163045251006	0.585571986531598	0.642101492691285	0.656434214281625	0.621995246578342	0.59971225700223	0.612164450799829	0.571935515690678	0.598160448410457	0.605561317305985	0.740584000472667	0.635184685852173	0.621719946868994
Nonadecane_653263.69_PRED	0.669935603519575	0.67049764204527	0.63436422369359	0.730910141897335	0.794172127973815	0.821785357529387	0.672792541064015	0.643536381426488	0.783051218635237	0.659758099046142	0.653086939400766	0.675565289024354	0.717820483165146	0.70048824866118	0.724233443323579	0.726796817022265	0.73640114466468	0.753219957358188	0.669181912561047	0.761425051854212
Nonan-1-ol,_n-_(1TMS)_336924.19_PRED	1.01295430222701	0.978949066595021	0.989948310923338	1.00942370795282	1.004777343937	1.04234744389504	1.00612204146327	0.995917843164188	1.00839532061344	1.02163597542137	0.990506447806286	0.995076219312254	1.01998486677012	1.01539109684902	1.01284428243957	0.998185474433872	1.02623603959427	1.0003996601212	0.957911830130588	1.02170624874
Nonanoate ((1TMS)) [MP-1.1]	1.16272213951618	1.20899321426551	1.1949451491618	1.18215968030314	1.16884646832163	1.15752560795095	1.15809679354342	1.1368500219896	1.16557023848793	1.11429624605491	1.18949812896639	1.19266883383472	1.14496575667137	1.16678144454275	1.24846444714926	1.14993544297	1.16248923021627	1.19638048636284	1.18141696382059	1.2653889344533
Octadecadienoic_acid,_9,12-(Z,Z)-_(1TMS)_775215.19_PRED	0.927585770070818	0.898653415258593	0.92094900618479	0.896419459555135	0.905676708047447	0.935560573005326	0.894637430421291	0.885498927521081	0.913538059878	0.908014514268311	0.898297687529364	0.874698661672019	0.9097861571643	0.890301936856988	0.901593402664744	0.891980648739066	0.906669535024202	0.906802129764658	0.953565787707046	0.923379308048501
Octadecadienoic_acid,_n-_(1TMS)_793033.19_PRED	0.989052375726646	0.891073424529321	0.968099227580222	0.94225240944968	0.916122429069343	0.922327657645008	0.952382529695346	0.898068038874293	0.874061166465227	0.969023319474665	0.9692537217081	0.913508132558475	0.878500155652285	0.930815700283749	0.881394032625937	0.917115528352913	0.950567197542802	0.877834669854166	0.938734763910969	0.939856969152683
Octadecan-1-ol,_n-_(1TMS)_754094.19_PRED	1.1485298617362	1.19330193382697	1.17973573075664	1.16804414830604	1.15159694297255	1.14275157555609	1.14297581970503	1.11932479507543	1.15141001441719	1.09925933925984	1.17486573286626	1.1794094906513	1.12923973843059	1.15163787592204	1.23502900515063	1.13368881672289	1.14838381486664	1.17932386388307	1.16295556685147	1.25125406256677
Octadecanoic_acid_(1TMS)_770496.62_PRED	0.952220570146253	0.943021113520754	0.937489215542464	0.976819113986242	0.982852885091972	0.973158104138935	0.958820927028723	0.854450895978595	0.943406832936747	0.930299399020563	0.969016355210305	0.946384327329242	0.935605942062999	0.963946152311626	0.963058068609985	0.947130113411966	0.958040529729183	0.966100613352911	0.931069350255982	0.983296020033973
Octadecatrienoic_acid,_6,9,12-(Z,Z,Z)-,_n-_(1TMS)_768264.69_PRED	0.967445203086648	0.969106846600112	0.906485555077399	1.0252715656543	1.02441589292137	1.05619390752212	1.0005655709342	0.989196327443265	0.990804316767079	0.980412373497391	0.797626459869992	0.992051141503437	1.03710316330191	1.04515275570259	1.0133695239619	0.981928699906909	1.02678964036986	1.01159895300659	0.981942124599486	1.05282542620022
Octadecenoic_acid,_9-(E)-_(1TMS)_771147.94_TRUE	0.915413571215219	0.892099416564224	0.898684363265567	0.899488506399613	0.900216951153813	0.939277486836204	0.900886070175882	0.876045164804061	0.911821411209562	0.894130175561628	0.892839739862011	0.861897134282433	0.90275965909944	0.886005856681881	0.920965705578894	0.89044512039074	0.887054549402057	0.911833051216142	0.906509243593375	0.931274895295029
Octadecenoic_acid,_9-(Z)-_(1TMS)_769944.38_TRUE	1.28602593522442	1.21017090651743	1.26762064313528	1.24170774707409	1.19689646816168	1.21515981901932	1.26052377048928	1.24682077564946	1.18071172903709	1.28944388384135	1.27687303429224	1.20806255876437	1.23346235450197	1.27077885364668	1.22276259667152	1.20931060607946	1.24485977254075	1.17395132579041	1.29384571929097	1.18568382130252
Ornithine (4TMS) [MP-1.1]	0.954457809834391	0.960596348174809	0.983348515210369	0.95495924484897	0.98667887584798	0.972747769953123	0.988031407815815	0.955625090164554	0.978416468229159	1	0.96909553816412	0.967366666423122	0.94919561878644	0.976046649307398	0.980804801703163	0.967877073661492	1.00870331356621	0.983745657913788	0.937785027252094	0.996413560528345
Ornithine_(3TMS)_(Derivate_not_found)_492548.84_PRED	0.867527570619561	0.866647406799369	0.866900668051896	0.864975979124264	0.889645118159286	0.870501886580847	0.879718632413397	0.827016359325157	0.887349046727184	0.870371523394355	0.895461160183968	0.845689000887343	0.893757374879075	0.892133439393395	0.871909019234624	0.883454542771223	0.887291879930663	0.879955490721134	0.895836194630596	0.887304668768542
Ornithine_(3TMS)_587245.62_PRED	0.730875770126979	0.70117348546377	0.737133299548164	0.719739224786135	0.750297418222111	0.745122018341885	0.729348385686814	0.67455611352851	0.743516310287157	0.761413697016319	0.72682583282122	0.699020852349994	0.736292858385989	0.729321047874888	0.733771520548109	0.718929094350787	0.746439058958073	0.711196463365076	0.699692783436673	0.76470672627999
Ornithine_(4TMS)_572079.81_PRED	0.87458396033628	0.774317919364409	0.915141224883086	0.891475447342477	0.835731683057276	0.836221201893053	0.860663496679468	0.884463878352842	0.802735741076337	0.904838662020661	0.890168788951375	0.825143089572528	0.858648099275786	0.829610963956147	0.84036971801191	0.852271210745552	0.868312375554659	0.848105557746129	0.93430168025147	0.873076015855303
Orotic_acid_(3TMS)_587220.69_TRUE	0.739029591505278	0.746405991640038	0.692449688776064	0.813010389503745	0.859045685215433	0.881558450972091	0.729043576141187	0.71475423079677	0.848300813690292	0.689450292328033	0.691590542502233	0.723629362298381	0.784551620632717	0.768122789259685	0.799433115418169	0.788830361252598	0.812081891070867	0.823135250739179	NA	0.842194006196655
Orthophosphate	0.976982321912287	1.07345445021144	1.12673828285324	0.967533355253812	1.01828621077534	1.15980520521353	1.09402812135992	1.19200644326	1.17483462931599	1.21272675691834	1.11170548197821	1.08882179438954	1.17565382085344	0.97578679680807	1.09292574323094	1.03980341116679	1.06766168222384	1.02919713053849	0.89409267220587	0.913225472879811
Oxalic_acid_(2TMS)_236929.91_PRED	0.946279495040008	0.989562636195611	1.0524963093164	1.0371083726572	1.00150151428632	1.00094493625197	1.02827533650935	1.00610401772524	0.959515349876039	1.04597905508515	1.04617861951953	0.992896604370377	1.01443325529309	0.999794241184761	1.00232330741727	0.947779423054635	0.993029103118088	0.97553809531629	NA	0.994421981607963
Oxaloacetate_(1MEOX)_(2TMS)_MP_473005.72_TRUE	0.961102739108883	0.951884211843005	0.970481614263225	0.9467237770313	0.953206840570528	0.982521850848189	0.94060131058023	0.918577657604552	0.975335659011548	0.948771316651548	0.936742720903717	0.913742107019373	0.957741786939531	0.950710186320076	0.951771969616582	0.955258149933427	0.948070737400249	0.975458076025854	0.964015736107569	0.998876415495638
Pentadecane,_n-_462471.41_PRED	0.957799159505701	0.863170878509198	0.930880671059444	0.895981322439613	0.88325343289633	0.915777251685481	0.940479364167985	0.938463728563512	0.883603545625006	0.9781475838868	0.956768733319314	0.905171160749926	0.900925772931819	0.952155952507624	0.864317123340556	0.89790934813778	0.930341120806095	0.825502537515827	0.965746359415136	0.871912077105376
Pentadecanoic_acid_methyl_ester,_n-_620606.38_PRED	0.655620517376678	0.621922770940556	0.667170422512412	0.616015695505609	0.642830613102938	0.667964203501029	0.65834457479068	0.672476040344439	0.8488964585541	0.743013148564473	0.654774171967184	0.628717693190683	0.629602949497254	0.665449149504466	0.604834848628705	NA	0.666097298214387	0.685255852757996	0.725296873680982	NA
Phenylalanine (2TMS) [MP-1.1]	0.712207010067985	0.669248514536152	0.716971356626954	0.707552424926057	0.678853354409703	0.686539323431407	0.672925731687798	0.639825961254805	0.585571986531598	0.682946220321342	0.665030890753332	0.654892674449441	0.635201284993494	0.693051020654608	0.613274484312191	0.677623755700901	0.683389262002385	0.579694362444757	0.678387744636374	0.724469653411456

## Sheet: LN
Table includes multiple worksheets – one for each tissue
hum - humanized mice
wt - wild type
number - animal ID
Metabolites	hum_101_4._lun	hum_102_4._lun	hum_103_4._lun	hum_104_4._lun	hum_105_4._lun	hum_106_4._lun	hum_120_4._lun	hum_121_4._lun	hum_141_4._lun	hum_153_4._lun	hum_98_4._lun	Wt_132_4._lun	Wt_133_4._lun	Wt_134_4._lun	Wt_135_4._lun	Wt_142_4._lun	Wt_147_4._lun	Wt_148_4._lun	Wt_152_4._lun	Wt_91_4._lun	Wt_wt4_4._lun
2-Piperidinecarboxylic_acid_(1MEOX)_(2TMS)_549118.94_TRUE	0.881929525777516	0.830375638271783	0.790383201116084	0.84830250503679	0.774071484208039	0.831424000290778	0.852378658011194	0.836717502295465	0.820725918579545	0.804412025112626	0.827684655792849	0.886412139069755	0.802429586438373	0.817852413757437	0.712207956158705	0.770127983652579	0.824619478188504	0.828491123718323	0.851454247153784	0.829614178672924	0.862170850083043
2-Piperidinecarboxylic_acid_(2TMS)_375026.84_TRUE	0.772650182781607	0.793950276767129	0.793504549071694	0.822256992264498	0.790719342638614	0.779271996749156	0.756618660995572	0.821670566874457	0.778103529609465	0.787677802104565	NA	0.793982526578063	0.744826532784409	0.809160104169181	0.772776666081814	NA	0.807253443877101	0.825388425063399	0.788005826846769	0.768952736404597	0.754555542609565
4-Hydroxyphenyl-beta-glucopyranoside_(5TMS)_872154.19_TRUE	0.697582078067138	0.692409234382832	0.647496035438418	0.726739116681058	0.628873388287877	0.656892776137423	0.682109194887706	0.600065196044971	0.640762571245121	0.713259092433707	0.713879602493171	0.584247890682002	0.640737061192699	0.60421211231477	0.611539519457627	0.670504078123796	0.630621323102272	0.689701597712899	0.714261515921997	0.586086065529499	0.732953793916615
Aconitic_acid,_trans-_(3TMS)_600462.25_PRED	0.834225559036736	0.844737606369243	0.851954444935001	0.85543582504113	0.842598155137319	0.835344529114451	0.841286926603697	0.840884553500192	0.833333746175012	0.812779623058827	0.820248617700739	0.844599873719296	0.852272658370145	0.855990767592158	0.852878388392384	0.832472737534922	0.844177670868792	0.829990670703155	0.84169158050688	0.831655498189856	0.852516502064402
Adenine (2TMS) [MP-1.1]	0.748465920596789	0.719754382324177	0.717447770721866	0.761189161651884	0.725603501566083	0.717114670108492	0.703281633211387	0.716561485279711	0.721434159983104	0.748029581997357	0.737630866450094	0.742548437194105	0.69495135589265	0.715183042289025	0.651710935156242	0.701137994549574	0.731812643567344	0.713776438297444	0.673362658244097	0.731358221080023	0.723760995880567
Adenine_(1TMS)_586048_PRED	1.01414665367418	0.980740366275476	0.993923473354852	1.00146872537148	0.980318310624581	0.982289511307559	1.01070202801476	1.00266387854521	0.982708957813451	0.955892930955782	1.00002878729234	0.995913623365633	1.00130103863127	1.02201093889781	1.0307082498657	1.00424338201497	0.999447812106382	0.973882098903529	1.00441971914617	0.971258420373498	1.00577012928958
Adenosine 5-P (|ADP|ATP) (5TMS) [MP-1.1]	1.09906886574658	0.996966397207016	1.02698115656511	1.028171512032	1.03354301617264	1.02498369108957	1.03555150226059	1.03297364279619	1.03485182266924	1.05116138691164	1.01431492271001	1.04692350393945	1.04720766058921	1.01935200445864	1.03003844579071	0.984835862615674	1.02175483386538	1.02169949876094	1.02461540076531	1.02554032933375	1.02725485246367
Agmatine [MP-1.2]	0.721099886926202	0.669261283752629	0.650714902371656	0.65347316893075	0.651005589334648	0.71392344497168	0.677443242724568	0.693502169336265	0.658210648197251	NA	0.703261460541255	0.69455886581215	0.679074736015583	0.670883080179757	0.594035515495041	0.650006757565175	0.658841096754044	0.690519394664394	0.661160136229239	0.661716876652204	0.694494763500506
Agmatine_[-NH3]_(3TMS)_578698.75_PRED	0.848509542626869	0.823724293324992	0.806804519677114	0.826705733970682	0.84329343707813	0.866755052855935	0.847221773167397	0.796554025117594	0.794778570674079	0.848533247740195	0.815579694247947	0.814498823537935	0.86000521285207	0.81362551786322	0.799266289392495	0.816100020526929	0.861609687193565	0.806148286969251	0.802396031824826	0.819360240949214	0.840260534928837
Alanine (2TMS) [MP-1.1]	1.14838002901622	1.11013763821267	1.12518686751465	1.10406507876766	1.11235933297497	1.12777809148667	1.12897556732699	1.14797099899388	1.13048678746567	1.14621525312717	1.1283881131274	1.12192310868903	1.15843074167301	1.14332863665698	1.16218964823752	1.15766020781476	1.12411341322203	1.14829912114304	1.1399030716161	1.1252518830668	1.13600758241667
Alanine, beta- (2TMS) [MP-2.1]	0.892459967037987	0.929751568215399	0.869240872090816	0.889090851367554	0.978415681196968	0.884569167711537	0.868613915909686	0.901382739318756	0.920444367838688	0.873749570807925	0.895029941939306	0.911248255537838	0.880611723898848	0.875991314159789	0.844953294980743	0.846783448417122	0.883838403542881	0.876701423119377	0.860459502871323	0.895744276412118	0.85564167909189
Alanine,_beta-_(2TMS)_273369.53_TRUE	0.679064559831987	0.813917008826449	0.793504549071694	0.781234615978881	0.872221895856761	0.831574640323778	0.801339419795248	0.804443254824231	0.814134419826671	0.817109592563335	0.678615130904341	0.810359328661906	0.859748887470602	0.791517167973485	0.809933728555293	0.806383263877932	0.821859661024913	0.792895875604105	0.807112162466127	0.821062451361409	0.776944989900701
Alanine_(2TMS)_207563.2_TRUE	1.14838002901622	1.11013763821267	1.12518686751465	NA	1.11235933297497	1.12777809148667	1.12897556732699	1.14797099899388	1.13048678746567	1.14621525312717	1.1283881131274	1.12192310868903	1.15843074167301	1.14332863665698	1.16218964823752	1.15766020781476	1.12411341322203	NA	1.1399030716161	1.1252518830668	1.13600758241667
Alanine_(3TMS)_355868.03_PRED	0.916623175944574	0.871693431714991	0.885153650137002	0.884977492369437	0.88958588834642	0.901636677931703	0.872890574431295	0.875193744313671	0.888169871136785	0.867161884353725	0.907486849969279	0.865313888829355	0.890500782476516	0.867728963429481	0.874117620559529	0.893172725114316	0.877204956098981	0.876339068887972	0.875702984239069	0.8875785042186	0.883148071374886
Allantoate	0.744941191512798	0.733190445930002	0.75758366082916	0.706961712632495	0.747303291908909	0.751936463312317	0.730348604278872	0.710024254763484	0.71284250889106	0.741143726017493	0.698093045856904	0.717005042238665	0.749012472044757	0.748344739280634	0.722011355164879	0.770207743142093	0.72901428853673	0.724490991675799	0.713616673834876	0.717769322283975	0.741834330774639
Allose_(1MEOX)_(5TMS)_BP_588062.44_PRED	1.2586792340776	1.21935322291611	1.23623095903774	1.24313364241939	1.21907393351979	1.21774022661403	1.25636220109722	1.24840470755378	1.22084424577041	1.18356045946935	1.24541302623322	1.23644096572264	1.24838120587694	1.27514659758358	1.28062070150488	1.24395897208891	1.24337934329449	1.21125850483629	1.24269301776598	1.203335603107	1.24932307887443
Arginine [MP-1.1]	0.840937444290251	0.898160757452288	0.906668573697584	0.917795771073813	0.889628258957973	0.88183376295052	0.858485999557215	0.900677273797891	0.884333018372339	0.936779795027841	0.776093714366829	0.888164123528495	0.89022497446762	0.859972338581466	0.863680815285922	0.950555980365666	0.889129828005453	1.0230175397032	0.959051963803006	0.935464898962581	0.882062930303598
Ascorbate, 1-Dehydro- (dimer;2MEOX) [MP-1.1]	0.790058755054899	1.00519274587689	0.917318511744738	0.997120885810395	1.01116725583946	0.996575362699811	1.02709580208095	0.98284471815642	0.970389629845911	0.940921724499603	0.96559401556492	0.964820618604585	1.0259642114806	0.978397624984111	0.8788769887983	0.991389586780796	1.01841663012539	0.917798147160634	0.928306043262862	0.914836122653184	1.01741860321875
Ascorbic_acid_(4TMS)_652392.44_TRUE	0.854568162559593	0.810951525647501	0.815181514025602	0.837678667039431	0.810588646217704	0.828403581173183	0.826561476967919	0.826500925219293	0.831141271819044	0.831059526534722	0.829677522704033	0.830294717534017	0.81536234539067	0.787721248538147	0.783722570482328	0.848597901447312	0.816165497607241	0.848630716124259	0.857597366090332	0.8256330250317	0.822677044482592
Asparagine (3TMS) [MP-1.1]	1.26920055802914	1.19814372793764	1.16897533547956	1.22571059192794	1.14557394369722	1.20830063160071	1.24634417252232	1.21912372015331	1.18505418089863	1.17034085929132	1.21581566473198	1.23467582115708	1.18784590910534	1.21094716101313	1.09970124712342	1.14665822394122	1.20278029841372	1.19746547474759	1.23796490854533	1.20109568955744	1.2439811194206
Asparagine_(3TMS)_550488.31_TRUE	1.02237134512772	0.962500735275871	0.935779451905062	0.983258639160651	0.914353746319554	0.974635729349934	0.999378347306113	0.975053717569853	0.950832463537532	0.943852655702493	0.974316742355239	1.09747978111025	0.954518922032051	0.965012289136605	0.875018889626158	0.913025028693017	0.964681996952487	0.960667835891043	0.990136328841574	0.963694263703322	0.99807662357014
Aspartate (3TMS) [MP-1.1]	1.13636506084211	1.09024464549166	1.10148549808173	1.09800117838611	1.0964479036236	1.13360870161955	1.14097276180182	1.1243381113722	1.1218909530377	1.11804752682411	1.13154750539305	1.12878107324692	1.15959273527209	1.12962752550225	1.12599464285357	1.12761915776076	1.16321360438709	1.13287599673731	1.11364262348738	1.10789614506429	1.13622281620554
Aspartic_acid_(2TMS)_458076.97_TRUE	1.00042725767128	0.950180616250784	0.969273630376058	0.960382521731039	0.955669127073022	0.991991292629244	0.993230041496366	0.98578960802415	0.986555490307964	0.977972214235803	0.985547568667106	0.995166930018214	1.01938739984293	0.982807966210776	0.98414857565738	0.984019974891061	1.01587681920224	0.986769271043097	0.970979417976589	0.976879248437823	0.997309185022866
Aspartic_acid_(3TMS)_458039.69_TRUE	1.13342182884718	1.08509244267326	1.09728565221744	1.09424804478303	1.09699680517738	1.13483465993544	1.14011703759721	1.1257432750483	1.12343870390657	1.11419816023541	1.12584993439384	1.12708780746328	1.16084276219079	1.13091289922959	1.12519797381315	1.12736311711722	1.16551353034503	1.13083549640873	1.11229654002821	1.10798337594882	1.13748471203576
Benzoate (1TMS) [MP-1.1]	0.715683696633214	0.699975095787252	0.699112884776984	0.729401398172678	0.749025299759784	0.717674438757376	0.663909393384411	0.676671151309657	0.682734004500102	0.739799437300132	0.732866318389763	0.689588139307853	0.705910563287878	0.653490751706107	0.706434337600952	0.708204227607932	0.663140159420706	0.724490991675799	0.656168985331119	0.740349767175373	0.670858513996138
Benzoic_acid,_4-amino-_(2TMS)_650574.94_TRUE	0.905192526869837	0.865281175810395	0.878336651024766	0.899819750844748	0.882029983808088	0.885157426783908	0.889114806021492	0.887778789607609	0.882118535406502	0.885068262247577	0.891813900867381	0.888328355331371	0.885077609207835	0.84722469781287	0.854469047227311	0.909230309380126	0.874176540987427	0.900714659001775	0.918305201504797	0.884934617241913	0.881051383073644
Butane,_1,2,4-trihydroxy-_(3TMS)_345095_TRUE	1.24385721564419	1.12388173915711	1.16411527976442	1.16848494767093	1.1279453236472	1.18573955178198	1.17240584250678	1.14870569991666	1.15933635822383	1.15609800850649	1.21980830609563	1.13558764387269	1.1474924213536	1.13350029685716	1.16634407483626	1.20709642968977	1.13175350129506	1.14247002917128	1.16316558483121	1.16644544843107	1.12999583444423
Butanoate, 4-Amino- (2TMS) [MP-2.1]	1.16140636788354	1.04947806494779	1.08204330901956	1.08681242648868	1.0577793584527	1.10298476010566	1.08883230344827	1.06933501800986	1.08593354862799	1.08073431380689	1.13996058309921	1.05997573149374	1.07473259625866	1.05389660967676	1.08826316775649	1.12766692158139	1.05300466100681	1.06536453246748	1.08266152971651	1.09085289860034	1.05214271618717
Butanoic_acid,_2-amino-_(2TMS)_249223.84_TRUE	0.647714202223631	0.690355392457348	0.655017505578991	0.667232785903236	0.698580680820729	0.690697629109307	0.67442070703156	0.630023208109705	0.630810659727137	0.690921936816058	0.626648267548783	0.626182009219796	0.641576324731503	0.646108549479522	0.651997969589104	0.65219463944094	0.71168429657033	0.690111301108985	0.66490894301613	0.63998615993712	0.656159756320223
Butanoic_acid,_2-oxo-_(1MEOX)_(1TMS)_MP_252911.77_PRED	1.06773608579738	1.36520680298707	1.25563954653282	1.27739905525373	1.41402703995727	1.21494182076727	1.17453973857545	1.26182516801571	1.33845475160074	1.27561012501072	1.06414180684625	1.30931633486025	1.24234864234012	1.27976480909278	1.28431864435474	1.1917488582005	1.20714811308788	1.21893645197298	1.2980232867955	1.33284166130686	1.20195657477481
Butanoic_acid,_3-hydroxy-_(2TMS)_249401.72_PRED	0.701713428893681	0.691680320995875	0.704848265425569	0.727672691913528	0.823038102586864	0.712173000912446	0.786850984814864	0.688982002761794	0.657621018735594	0.775116540734169	0.694171217548874	0.737969253960373	0.670694112386819	0.686103110098861	0.826503570213508	0.70413925457859	0.84997219455451	0.790900971933173	0.780145055572944	0.668568227569453	0.627945877851626
Butanoic_acid,_4-amino-_(2TMS)_342578.41_TRUE	0.992998939337079	0.887654860874067	0.913718878929157	0.925089285457319	0.886989971127832	0.939457593813442	0.922262278806453	0.902964761980248	0.921304714203068	0.914482662071119	0.967182743933626	0.893028006347654	0.893809903212407	0.888702597508165	0.900436808695944	0.951539045008657	0.886349135393613	0.903476388021964	0.911301408297149	0.921025889063254	0.882034960718749
Butyrate, 2-Amino- [MP-1.1]	0.647714202223631	0.690355392457348	0.655017505578991	0.667232785903236	0.698580680820729	0.690697629109307	0.67442070703156	0.630023208109705	0.630810659727137	0.691163990167199	0.626648267548783	0.626182009219796	0.641576324731503	0.646108549479522	0.651997969589104	0.65219463944094	0.71168429657033	0.690111301108985	0.66490894301613	0.63998615993712	0.656159756320223
Butyric_acid,_3-amino-,_DL-_(2TMS)_281258.31_PRED	1.06370245330921	1.03174334316382	1.03731599369043	0.805625802163847	1.02951148877246	0.969499888107814	0.950530782060317	1.01386730502625	1.09869850198275	1.01743289530766	1.09448260742088	1.05622916035286	0.930861505083015	0.995052490525265	0.925315698985239	0.957032983480399	0.702633483793028	1.00765572414108	0.99852676028461	1.00455529104561	0.979119097092437
Butyro-1,4-lactam_(1TMS)_241244.02_PRED	0.773486611061328	0.980253914402127	0.927369114012235	0.974222897625821	0.939006126689401	0.955240749259467	0.858633403676649	0.908872099839514	0.904134992965813	0.951128947855725	0.719280477057052	0.870851861302963	0.911231145880234	0.914210258066812	0.832178600338355	0.897884564713173	1.00681098771002	0.965065817389091	0.870870721634385	0.903262130838543	0.915420221618693
Calystegine_A3_(1MEOX)_(3TMS)_BP_588253.69_PRED	0.95197457656924	0.923776420076226	0.928679078460727	0.937652479938608	0.916078161080959	0.915905701718479	0.945512983192168	0.941771323686374	0.917852865517347	0.89088524682923	0.932580794561275	0.928347976460354	0.942306230156352	0.959613696836065	0.962699292490356	0.937944654605647	0.941467112381236	0.911492180778734	0.938882372171561	0.89841068015248	0.940430964550875
Calystegine_B4_(1MEOX)_(3TMS)_598843.25_PRED	0.980707280072144	0.954017470546449	0.972765114001459	0.973889283558537	0.956744450895582	0.954649791702249	0.977156891147815	0.973858880677761	0.955889773900682	0.932851837209185	0.97302867058288	0.965364177301417	0.98044542769928	0.991392154891197	0.992977236375826	0.977647990635673	0.972931547290198	0.951951777048966	0.970669396731756	0.941003163008799	0.975891640955419
Caproic_acid,_2-oxo-_(1MEOX)_(1TMS)_326540.84_PRED	0.863532815965218	0.778757903771018	0.713456015979335	0.756772663298901	0.68388886716717	0.717226863439937	0.74738642563224	0.720580402419573	0.776912429541855	0.677059268143901	0.893226310972587	0.773479471806427	0.611187677085944	0.750369987434599	0.602011462747488	0.695834005792603	0.580847438784173	0.631887512132389	0.670683466952033	0.667371251881224	0.763827887185792
Cellobiitol_(9TMS)_870156.12_PRED	0.743849936604531	0.725633578838715	0.67941752832541	0.770833664763337	0.65976941281182	0.706117414734509	0.726515734120604	0.63324001459923	0.654418965460533	0.737133910644725	0.761858668009005	0.613650886595677	0.668329949867179	0.643324413963679	0.647312610056451	0.71045946345708	0.658401479085245	0.720804457881393	0.740048527159852	0.618707761121834	0.770070298426965
Cholesterol, D6-	0.942950182552543	0.926767477706122	0.912337120763335	0.906791126048053	0.945631945395814	0.922837261688918	0.871003517084302	0.872801426433391	0.90949207736631	0.9585100036721	0.908977746303583	0.889401278733	0.900965469166162	0.900453306623658	0.890121507785514	0.899489377914419	0.885674975098168	0.906251660252958	0.872737600406338	0.936428092943004	0.893030138092985
Cholesterol_(1TMS)_1079629_TRUE	0.905829183654476	0.801414115878683	0.813971369879303	0.833544628266405	0.907013254269798	0.890843766841631	0.780567293606218	0.926554854855378	0.844815675124676	0.890420117731885	0.935755161423285	0.881676008878919	0.89568985742359	0.862336214662772	0.804658772385027	0.830948378371833	0.87362448207697	0.85525772829055	0.827277205798869	0.89924747507648	0.879716170386043
Cinnamic_acid,_3-hydroxy-,_cis-_(2TMS)_599148.38_TRUE	0.801888734548389	0.832884425490618	0.841031626817211	0.841777783437866	0.836052545122838	0.82668277007333	0.800140467355478	0.81086460133615	0.796256381749765	0.822779252818211	0.779825565158979	0.81911642934933	0.835139813621769	0.831959652358331	0.811614811209178	0.811866169601452	0.829183830669061	0.822151955883887	0.825892969205587	0.821922698749575	0.826225578675014
Cinnamic_acid,_3-hydroxy-,_trans-_(2TMS)_653564.75_TRUE	0.889290769609877	0.848682770209184	0.854192839003927	0.878915730306551	0.854307660109607	0.861515958955308	0.868109325229182	0.874532891155871	0.861418626398745	0.869221308046576	0.87659106205486	0.87004644260596	0.864166301042239	0.835600547922513	0.829717742317194	0.886593210916401	0.855605467963829	0.888162811462939	0.901600464325151	0.863903547553008	0.862876000027562
Cinnamic_acid,_3-methoxy-,_cis-_(1TMS)_587950.5_TRUE	1.06452358400853	1.03172611237813	1.04569754291175	1.05304379282975	1.0268278491376	1.02674977978584	1.06185385836562	1.05696492495678	1.03418482600737	0.997492888068251	1.04979386604601	1.04624880775035	1.05423714958015	1.07598799258817	1.08158153417765	1.05363504978425	1.05190354087728	1.02078883761438	1.05196389619512	1.0124286363766	1.05624594146175
Cinnamic_acid,_3-methoxy-,_trans-_(1TMS)_649428.75_TRUE	1.09166698988945	1.04766772951196	1.06026059480284	1.08156303294005	1.05605729695507	1.06552173021423	1.0675814662566	1.07382605538704	1.06314986111492	1.06130112497518	1.07688759080605	1.07414154766027	1.06924921843151	1.03836396451379	1.04318097203755	1.09581528649573	1.05817604191945	1.08592940442102	1.10038874427262	1.06008398185488	1.06408422374733
Citrate (4TMS) [MP-1.1]	0.977891331377888	0.961406949198256	0.954453607224657	0.969033232402767	0.994563038097556	0.953210670228424	0.992543511192112	0.960359532899544	0.961538190363817	0.972745485095458	0.984010249750589	0.980167340420282	0.993301619463157	0.954524073489323	0.986848464325833	0.97853650741439	0.957381808345878	0.971304892612077	0.978203577414958	0.970345938155549	0.953550346606587
Cysteine_(3TMS)_479326.28_TRUE	0.907668910578884	0.870233653357545	0.861049127890101	0.915448857594275	0.924873666934139	0.941966355279631	0.963652001895345	0.900393778569696	0.846060459814011	0.851100153795325	0.915420340207542	0.844954123381772	0.925047863974388	0.89440252043235	0.859106915315554	0.87955311033833	0.919899101024041	0.815604341606755	0.84455751710029	0.867130567239165	0.915604252376903
Cystine_(4TMS)_791615.31_TRUE	0.782359694559755	0.653461558114492	0.54960545304634	0.583063667384011	0.595239046247874	0.70113833440576	0.658597094310377	0.582603061954043	0.459529315586605	0.670617614682219	0.894543378215544	0.474448994192811	0.633476203907354	0.595844299783793	0.580037304510061	0.532633403268088	0.673566841785382	0.521997099769957	0.472756968410155	0.485151386473048	0.585531632691638
Dehydroascorbic_acid_(2MEOX)_BP_639171.94_PRED	0.625840810109153	0.815773696920144	0.727177964020872	0.794375467481256	0.820893254047398	0.803519211706497	0.829160100743773	0.788373602434487	0.778041176939988	0.759811360353775	0.793903924375148	0.767682739788194	0.813687712741553	0.773867272580337	0.681036068983316	0.799154192322379	0.807035771526043	0.720194115226423	0.733389019292546	0.71903310590678	0.82174659315236
Dihydroxyacetone_phosphate_(1MEOX)_(3TMS)_MP_591892.31_TRUE	0.900524913640566	0.87529472259616	0.881420248919627	0.889955616706552	0.867146742679905	0.870064201655033	0.893967856685621	0.891493462245618	0.872507391160238	0.851100153795325	0.885189087557682	0.885981544797034	0.892951738085867	0.904347950843484	0.917456556227187	0.884589604422869	0.888092388388808	0.869977370566062	0.89001818884894	0.857216042026957	0.886150640288689
Docosahexaenoic_acid,_4,7,10,13,16,19-(Z,Z,Z,Z,Z,Z)-_(1TMS)_907201.25_TRUE	0.76114135189705	0.658194636890543	0.650714902371656	0.630105864016889	0.651833372767179	0.678938167565393	0.679216793378164	0.653396193444746	0.631571819101191	0.670024915372458	0.809796431003869	0.642323569434327	0.65318774102404	0.666406617252603	0.636965525044674	0.718774757059944	0.699835593594687	0.728051143868988	0.699527310539761	0.694604147662951	0.643895176155039
Docosenoate, 13Z- (1TMS) [MP-1.1]	0.75991990455099	0.657589240416167	0.651444144382827	0.622277107938233	0.651420300640613	0.682434872049748	0.684181895053778	0.64547570839694	0.604617431447329	0.650791020859894	0.792450102446614	0.623330607253712	0.645139315030476	0.661474415120185	0.618762152627549	0.697736213274525	0.701170086242469	0.709115286011436	0.699231474232941	0.673871298212903	0.658904999338101
Dodecane_260776.19_PRED	0.833845426198675	1.1243203631785	1.01534576647942	1.04022172584104	1.16583621345414	0.980170899857168	0.935004765984282	1.01950842704221	1.09625510601565	1.0504548337473	0.826819095106134	1.06328173321696	0.996782521109027	1.03329560118254	1.04325341899582	0.955355087489985	0.971513259238091	0.98997826194051	1.05381956480472	1.10032683408846	0.966433433253084
Erythronic_acid-1,4-lactone_(2TMS)_462181.38_TRUE	0.964079387104487	0.920167366175473	0.928334950460095	0.923658902501209	0.92997762512089	0.962989053563204	0.968503828634394	0.953359173657323	0.956106187984413	0.950064139860767	0.954993930555899	0.957535696720151	0.990479128802172	0.955945621216027	0.952683168634005	0.958178301519231	0.995473228345266	0.963057580116325	0.946454566083261	0.93405621348895	0.966775654032833
Ethanolamine [MP-1.1]	1.14818937912011	1.09864872058704	1.11605428480964	0.831371967503734	1.05787678913911	1.04453186638574	1.02971432255147	1.09333004827962	1.17258997271849	1.08937987190561	1.18145223351123	1.13290825031653	0.999566320456243	1.071239020428	0.997432106461454	1.04064266226459	0.714060290907664	1.07759131390469	1.07761627663078	1.07317943193889	1.058816236317
Ethanolamine_(3TMS)_321815.91_PRED	1.35033828764	1.22842635192483	1.16993422251846	1.2200962018977	1.10697645566414	1.18507866359075	1.23247788953443	1.19764013673347	1.24138198169119	1.10439173371373	1.38256814344392	1.24050017454591	1.07562813174033	1.22597290715698	1.0809217693127	1.16411611923998	1.03226447562432	1.09257824980009	1.1319550982163	1.11978655181532	1.22972934452421
Fructose (|Psicose) (1MEOX;5TMS) [MP-1.1]	0.746771346388153	0.749156356654879	0.763600358126326	0.794002066660816	0.789346036254645	0.769463406912224	0.738193267725842	0.766347556594518	0.747055812041731	0.720407566382074	0.761237305790255	0.759977805621165	0.855333423167562	0.736013478555877	0.757923208456795	0.768924390398649	0.740912929830369	0.772037393020089	0.783077390870486	0.744200818956831	0.739841374846481
Fructose (|Sorbose) (1MEOX;5TMS) [MP-1.2]	0.719599589839465	0.716108515315726	0.695806055805064	0.748406602062881	0.734288976133575	0.730480521105847	0.654494676290397	0.707753196918347	0.688172056355108	0.650431762526936	0.73052082693096	0.704117584621334	0.805750898597256	0.649121324525821	0.704853665149447	0.719289639170895	0.694323650621773	0.715605190356461	0.738933235936725	0.696830606513777	0.669843978083315
Fructose_(1MEOX)_(5TMS)_BP_585803.75_TRUE	1.18359252184174	1.1467267035885	1.16267035277664	1.17020528480522	1.14664598892171	1.14537209608737	1.18063770249864	1.17377898705307	1.14738667095146	1.11313288391288	1.17056078247993	1.16458167854364	1.17410718130172	1.19662322772996	1.20475267754646	1.17480815321218	1.17001970059548	1.1410892286843	1.1671900007354	1.13184426628129	1.17351553125055
Fumarate (2TMS) [MP-1.1]	0.752488182859217	0.785377021120249	0.777643187436989	0.80579336748024	0.777533343134335	0.759990819606229	0.748827943519497	0.811464273412805	0.779957042385517	0.774368395819978	0.742511133477195	0.786745037785048	0.737998207875635	0.790047416968379	0.752449682473945	0.765979210085111	0.79308621952399	0.805072475783859	0.775625004680954	0.744774551543937	0.744401244962644
Galactaric_acid_(6TMS)_658294.38_TRUE	1.08729334719907	1.04317576372776	1.05530878712035	1.07322181261609	1.0526547957003	1.06113356940871	1.06436540932674	1.06799740707521	1.05718962117406	1.05786678952674	1.07162782157026	1.0676716348128	1.06556905799244	1.0345671427189	1.03664447556068	1.0903529489498	1.05186536719508	1.07985698645559	1.09528458182549	1.05360559030394	1.05966828074172
Galactonic_acid-1,4-lactone_(4TMS)_619566.38_PRED	0.426942066227077	0.439375210562275	0.700192799790019	0.460928093156821	0.892593494816834	NA	0.587352352277483	0.523599275662323	0.381616955189105	0.824404238334109	0.561627699233657	0.434596768541337	0.939443637251445	0.329460863587917	0.901263923514842	0.720566092003812	0.923313287930084	0.759758025810963	0.685493196594443	0.81896035483391	0.423040583597476
Galactono-1,4-lactone [MP-1.1]	0.690444011563636	0.662143823763938	0.670679673677091	0.677573577177185	0.621699818139519	0.69714042669147	0.693643941971281	0.673358361303699	0.669002116102668	0.683380724422294	0.686585857150744	0.689433793339786	0.689558930139258	0.660407174443502	NA	0.688382958651973	0.658180987142142	0.658676412009788	0.67816579726143	0.660804949350149	0.687815724472537
Galactopyranoside,_1-O-methyl-,_alpha-_(4TMS)_585464.62_TRUE	1.19614120968996	1.16062682963487	1.17503163892559	1.18287126115843	1.15575151887223	1.1561572593571	1.19066531590288	1.18464256081875	1.16000340288225	1.12510574743081	1.18194191951911	1.17571296872316	1.18139498919075	1.21062279928062	1.20798923962193	1.18082063518083	1.17917655900509	1.15106722255743	1.17683619177683	1.14162599482433	1.18580022471832
Galactopyranoside,_1-O-methyl-,_beta-_(4TMS)_598177.19_TRUE	1.02601180833527	1.00985727981022	1.02677921637705	1.0279497626879	1.00717269531746	1.01013421452043	1.03097411020265	1.02467457932706	1.00483443093003	0.986051820496649	1.01934999475823	1.01860362220605	1.03200686020948	1.04910159320707	1.04176266961021	1.02206706537919	1.02740741735858	1.00385818247212	1.02396994343542	0.998105825071192	1.02716860663387
Glucaric_acid-1,4-lactone_(4TMS)_660551.44_TRUE	0.776607143016056	0.800431739063245	0.809817257779399	0.785505195861805	0.782961937989341	0.787037936430149	0.809493706359596	0.802036131285694	0.798074776135196	0.768348679875482	0.712345377849485	0.801505304570215	0.794793983893609	0.811550752564837	0.796083262463566	0.800543677623258	0.781966866810749	0.788286038331991	0.79411914442477	0.786225054073906	0.805180287103087
Gluconate|Galactonate [MP-1.1]	NA	0.934205429233509	0.850686154776315	0.931246929458527	0.940448712315135	0.931636129184413	0.958687001042192	0.913344261893365	0.907029823077799	0.88457587728657	0.888742496375066	0.896186590318623	0.953955394033362	0.907884695920497	0.826328690900154	0.924361077107015	0.949028553107326	0.852782752928021	0.861460988658724	0.855481831230248	0.949849106737573
Gluconic_acid,_2-oxo-_(1MEOX)_(5TMS)_BP_593592.06_TRUE	0.922699779185937	0.895252713363824	0.909842839222027	0.912373909798769	0.911558139326574	0.899847997595598	0.925335192193101	0.917475610834892	0.893207735085164	0.87260532479185	0.912312698964972	0.90724940696583	0.931126164426288	0.927282032164549	0.964316164338028	0.928553506403383	0.915490926833647	0.900624915907774	0.918924694283911	0.897905353778095	0.917848276788464
Gluconic_acid-1,4-lactone_(4TMS)_646839.44_PRED	0.769843004773644	0.734171181323382	0.763005183663185	0.740775394691841	0.799507506587571	0.750884680008842	0.739539770975991	0.753499759439716	0.726044508891203	0.790465320541877	0.739609716794951	0.749677391302466	0.848105743788367	0.754311612480944	0.805579273411445	0.749896479792107	0.861935329702072	0.760729332467519	0.75860206074601	0.808472815885217	0.748774425291156
Glucopyranose_[-H20]_(4TMS)_561007.94_TRUE	0.631894057688959	0.711365678133624	0.74523568744539	0.757477668959558	0.747468520578842	0.748914732310042	0.745820184656314	0.701703296046499	0.725941952339515	0.738969153562478	0.659725333090548	0.725018308819558	0.725598579333594	0.705493532140441	0.733215455884269	0.721576386352568	0.743220336130233	0.706935930677468	0.702153396224641	0.746235499339232	0.748579480294136
Glucopyranoside,_1-O-methyl-,_alpha-_(4TMS)_613929.06_TRUE	0.710280863654181	0.707662497969011	0.670274232811646	0.702935294808576	0.663337836970897	0.740192777882317	0.676645506690444	0.66993959409018	0.721648186545672	0.728526118367683	0.659954605226221	0.701256977520185	0.64540856439393	0.686315009901917	0.629832538685686	0.713349007846511	0.666254157079703	0.70339893701549	0.68616538342993	0.682249462659155	0.715844053908433
Glucose (1MEOX;5TMS) [MP-1.2]	1.11262504016354	1.07944127387903	1.10146397135838	1.10058624603369	1.08327452850738	1.08003008223114	1.10773133750392	1.10225194682201	1.08352993893751	1.0590044514517	1.10121369473384	1.09108113253866	1.11059114564973	1.12522689110859	1.12904742574981	1.10054219964709	1.10148530372295	1.07311779688291	1.09834877570293	1.07319683484568	1.10278053132071
Glucose_(1MEOX)_(5TMS)_BP_599322.19_TRUE	1.02830954144162	1.00303360279298	1.02115451465585	1.0171926397258	1.0005498628505	1.00342463730019	1.02678803739501	1.02313277962599	1.00298966464271	0.977072510994871	1.01963000715033	1.0122591299031	1.02842215348703	1.04278268395987	1.05044728464333	1.02499288440507	1.02330701689242	0.992913996586606	1.01752694439543	0.99025373991371	1.02320620299881
Glucuronic_acid-3,6-lactone_(1MEOX)_(3TMS)_MP_657311_TRUE	1.15464505229051	1.10711868635632	1.11759872827191	1.14113377173203	1.11497109162324	1.12340986757029	1.12991547695783	1.13307206043599	1.12340880036265	1.12029576074112	1.13677277806418	1.13352946321676	1.13035317141214	1.09956067133794	1.10497389556292	1.15666701463119	1.11566953858414	1.14312753114364	1.16070830582421	1.11727208928608	1.12287376297182
Glutamate (3TMS) [MP-1.1]	1.1366581694898	1.12039661148745	1.13315272015926	1.13675297482444	1.14638490684559	1.15924355294691	1.17180571991399	1.14651228878813	1.1444383887463	1.1503009838792	1.08614243483392	1.14781380597322	1.18165088401985	1.1401584044155	1.15739853639005	1.15499452035998	1.19812618600044	1.15164541789976	1.14447237967437	1.14769477379789	1.16438975069328
Glutamine [MP-1.1]	1.07764796533052	1.11178552856561	1.12535340910914	1.12951994240654	1.11864015960663	1.10032094684798	1.07701858391098	1.09027596820543	1.07118057691581	1.08863517068213	1.02636512300865	1.09974432891743	1.113827721157	1.11625698334915	1.09691234340547	1.0868177520944	1.11320389804379	1.09134336868394	1.09985856698555	1.10804812872665	1.11264834048708
Glutamine,_N-acetyl-,_DL-_(3TMS)_655207.31_PRED	0.768716762440377	0.731601969568291	0.724399773080543	0.759478954920795	0.744113268937076	0.749410703867807	0.740538693946928	0.739000911361097	0.744680952711805	0.75937764131556	0.756691048314828	0.74950272992092	0.732157192952766	0.715831908761889	0.702167424804067	0.762608651965466	0.737407603992629	0.75512543700695	0.781655432444	0.745669787907704	0.738348718225899
Glyceraldehyde-3-phosphate_(1MEOX)_(3TMS)_BP_571519.81_TRUE	1.09433432487562	1.07533204399542	1.05570049306808	1.07912808117542	1.0781500373186	1.11657618075964	1.10276680323123	1.04691879757535	1.03622083828683	1.08628646440038	1.06934599389777	1.05989277669909	1.1089265516665	1.06992771604181	1.06412250716877	1.06373043072595	1.11462846420187	1.05042292395174	1.05045023217421	1.06951287962202	1.08902938255568
Glycerol ((3TMS)) [MP-1.1]	0.991927666575177	0.969262253084919	0.950148668662305	1	0.945755813031464	0.899021158051939	0.954497703140881	0.950422428809759	0.897397906875998	1.02813966656506	0.957633476835481	0.928299837992553	0.953450285011312	0.895727519517804	0.98238111607217	0.978831045148631	0.946840897077887	1.00812877327799	0.984362727176004	0.935216147092799	0.915317845157842
Glycine (2TMS) [MP-2.1]	0.859030643077284	1.1976324304695	1.26202222896437	1.24409673314712	1.3049656094158	1.2575809471479	1.27836314059817	1.24336506079252	1.14447413710126	1.25126035255509	1.01043365920985	1.19913079857718	1.32274168609305	1.21342332968979	1.3133250190023	1.24512077045924	1.31256009780072	1.20689827368292	1.21449585235996	1.2809266264225	1.22581736185474
Glycine,_N-acetyl-_(1TMS)_334790.31_PRED	0.955111236029845	0.88987283040446	0.904785600625915	0.918553814967863	0.92452538528525	0.907393585120491	0.912790433418601	0.908280464041506	0.915212380607415	0.914373403936332	0.945726039095318	0.931430778093152	0.907932548337535	0.918318368149878	0.915897123317445	0.929437288556382	0.906321533052942	0.914896677769478	0.895920658223557	0.910854640804386	0.898873851052123
Glycine,_N-cinnamoyl-,_trans-_(2TMS)_737734.19_PRED	0.677045492127217	0.696120131109511	0.670274232811646	0.667641782918779	0.685245142882771	0.685211447575373	0.66854063923098	0.676671151309657	0.697192674229893	0.668979363414714	0.670627474823395	0.674704989048856	0.689915106175082	0.651182074561057	0.662382642715362	0.643943409723564	0.693693205372603	0.634945888927886	0.633189650001046	0.678763112489567	0.669025354700386
Glycylglycine_(3TMS)_628479.25_TRUE	0.601700616246425	0.810480511416373	0.716529613101515	0.792368701308075	0.816934967222739	0.794857008146962	0.818633450879924	0.784035943543407	0.768855245650984	0.762134304020655	0.756691048314828	0.757333269225711	0.816464456103299	0.768897462687569	0.662902850693414	0.790612737040733	0.813071297727199	0.715284800355675	0.716927894430179	0.727377671890054	0.818602110497403
Glycylglycine_(4TMS)_591933.56_TRUE	0.804607171007621	0.773856423644885	0.78723588709605	0.791350963738108	0.778457918129371	0.783941018667011	0.796789050379534	0.794535025037934	0.773776585865063	0.74954443641974	0.794558289548947	0.786990376152262	0.792077550025416	0.812827032922841	0.815160200601459	0.78767451150282	0.796026298150176	0.774485583597898	0.793267064028065	0.758320564670843	0.793860805090435
Guanosine-5-monophosphate_(6TMS)_1065235.12_TRUE	0.846496600804813	0.789664800035729	0.802356089790008	0.790966791717142	0.811263323266947	0.793998540513557	0.789964932142506	0.792021657545551	0.769195158105092	0.840843416724744	0.804101813337035	0.794154389961752	0.776568446024421	0.764524793534335	0.762928132004924	0.752468714106021	0.819705513368864	0.779503935388921	0.786127186952713	0.813616948954882	0.783614960567498
Gulose_(1MEOX)_(5TMS)_MP_584150.19_TRUE	0.690083425727502	0.695133870365345	0.681082500307095	0.705684026000872	0.703220476120878	0.660808464527353	0.687670492093156	0.688810861590934	0.662624053535168	0.682200062168053	0.694337524304595	0.690203274872029	0.703273652439442	0.699465840427874	0.711210951637659	0.688896191814662	0.677135330187057	0.688324128234841	0.684816728285285	0.640209683630239	0.691374223811193
Heptacosanoic_acid,_n-_(1TMS)_1053682.38_PRED	0.884429609960804	0.792895187825139	0.816894208861852	0.818707641826477	0.824707072924769	0.827546709815754	0.821740290597491	0.824691011085858	0.826613528970996	0.849901718887249	0.803022159952154	0.845694198057938	0.838987491035207	0.807139020390678	0.811012590222375	0.769728290589166	0.806050696669019	0.816899064115283	0.811009070733343	0.825105615014779	0.824418085205343
Heptanoic_acid,_n-_(1TMS)_255612.95_PRED	0.892459967037987	1.21584244785948	1.09123714515717	1.11631110034713	1.27756578314067	1.05118764689327	1.01097908720409	1.10238069353262	1.20648756051082	1.11964265585758	0.884880561501888	1.17390430689739	1.07695030842679	1.11204287599398	1.12316117552683	1.02181013455354	1.04321612182462	1.05718846198014	1.14508172322947	1.17426186144129	1.0366107133132
Hexadecanoate (1TMS) [MP-1.1]	1.04557802035664	1.04482137668056	1.04859688330197	1.02591883215236	1.05821919316951	1.03468419086046	0.995129322783264	1.01309544411109	1.01539746043721	1.04559158980241	1.03119913566457	0.991660624642367	1.03672113184733	1.01548618145826	1.00476265888108	1.02060798703632	1.00165656368086	1.03311016319887	0.963633999860301	1.03816245327943	1.02004844121811
[truncated: 87 more rows]

## Sheet: LV
Table includes multiple worksheets – one for each tissue
hum - humanized mice
wt - wild type
number - animal ID
[truncated: 274 more rows]

## Sheet: MS
Table includes multiple worksheets – one for each tissue
hum - humanized mice
wt - wild type
number - animal ID
[truncated: 226 more rows]

## Sheet: SP
Table includes multiple worksheets – one for each tissue
[truncated: 262 more rows]

[truncated: 1 more sheets: TS]
