# Supplementary material for: Reduced purine biosynthesis in humans after their divergence from Neandertals
Source: eLife. 2021 May 4;10:e58741. doi: 10.7554/eLife.58741 (PMC8133780; doi:10.7554/eLife.58741)
Supplement: Supplementary file 9. — Table lists 45 metabolites showing significant intensity differences in the prefrontal cortex (PFC) at one week of age and 36 showing significant intensity differences in the in cerebellum (CB) at 12 weeks of age. Table includes multiple worksheets – one for each tissue. [file elife-58741-supp9.xlsx]

## Sheet: PFC
Supplementary Table 9. Metabolites showing significant intensity differences between humanized and wild type mice.
Metabolites showing significant intensity differences in the prefrontal cortex (PFC)
Table includes multiple worksheets – one for each tissue
Metabolite	p­value
Glucose-6-phosphate_(1MEOX)_(6TMS)_BP_781714.75_PRED	0.000415
Fructose-6-phosphate_(1MEOX)_(6TMS)_MP_767170.94_TRUE | Fructose 6-P (1MEOX;6TMS) [MP-1.1] | Fructose 6-P (1MEOX;6TMS) [MP-1.2]	0.002433
Arginine [MP-1.1] | Creatinine_(3TMS)_489565_TRUE	0.002756
Alanine (2TMS) [MP-1.1] | Alanine_(2TMS)_207563.2_TRUE	0.004601
Fructose-6-phosphate_(1MEOX)_(6TMS)_BP_(Derivate_not_found)_768948_TRUE	0.006373
Tetradecane-1,14-dioic_acid_(2TMS)_801298.94_PRED	0.006866
Cinnamic_acid,_3-methoxy-,_cis-_(1TMS)_587950.5_TRUE	0.006908
Nonan-1-ol,_n-_(1TMS)_336924.19_PRED	0.007702
Glucose 6-P|Galactose 6-P (1MEOX;6TMS) [MP-1.1] | Glucose-6-phosphate_(1MEOX)_(6TMS)_MP_775879.88_PRED	0.007756
Phenethylamine_(2TMS)_490740.62_TRUE	0.008012
Glutamate (3TMS) [MP-1.1] | Glutamic_acid_(3TMS)_509813.31_PRED	0.010844
Erythritol_(4TMS)_410125.56_TRUE | Threitol_(4TMS)_410391.25_TRUE	0.011379
Orthophosphate | Phosphoric_acid_(3TMS)_333095_TRUE	0.011571
Malate (3TMS) [MP-1.1]	0.012292
Glycine,_N-acetyl-_(1TMS)_334790.31_PRED	0.013822
Pyroglutamate (2TMS) [MP-1.1] | Pyroglutamic_acid_(2TMS)_507313.84_TRUE	0.014946
Glycylglycine_(4TMS)_591933.56_TRUE	0.015461
Gluconate 6-P (7TMS) [MP-1.1] | Gluconic_acid-6-phosphate_(7TMS)_802294.06_TRUE	0.016137
Erythritol|Threitol (4TMS) [MP-1.1]	0.016525
Glucuronic_acid-3,6-lactone_(1MEOX)_(3TMS)_MP_657311_TRUE | Inositol, myo- (6TMS) [MP-1.1]	0.018019
Hypotaurine_(3TMS)_509415.53_TRUE	0.020366
Galactaric_acid_(6TMS)_658294.38_TRUE	0.020505
Gulose_(1MEOX)_(5TMS)_MP_584150.19_TRUE	0.020897
Nonadecanoic_acid_methyl_ester_324789.09_PRED	0.021418
Cinnamic_acid,_3-methoxy-,_trans-_(1TMS)_649428.75_TRUE | Inositol,_myo-_(6TMS)_654785.31_TRUE	0.021676
Adenine_(1TMS)_586048_PRED	0.023482
Serine_(2TMS)_328955.09_PRED	0.028962
Docosan-1-ol,_n-_(1TMS)_890459.25_PRED	0.030709
Tetradecanoic_acid,_12-methyl-,_methyl_ester_607457.12_PRED | Tetradecanoic_acid,_13-methyl-,_methyl_ester_604072.19_PRED	0.031906
Malic_acid_(3TMS)_442513.44_TRUE	0.033746
Ascorbate, 1-Dehydro- (dimer;2MEOX) [MP-1.1] | Dehydroascorbic_acid_dimer_(2MEOX)_MP_625466.25_TRUE	0.035465
Tartaric_acid_(4TMS)_511834.44_TRUE | Xylulose_(1MEOX)_(4TMS)_MP_509094.19_TRUE	0.035759
Glucose,_2-amino-2-deoxy-_(4TMS)_BP_659366.94_PRED	0.039311
Homoserine_(4TMS)_510930.09_TRUE	0.04058
Benzoic_acid,_4-amino-_(2TMS)_650574.94_TRUE	0.040691
Butanoic_acid,_3-hydroxy-_(2TMS)_249401.72_PRED | Butyrate, 3-Hydroxy- [MP-1.1]	0.041222
4-Hydroxyphenyl-beta-glucopyranoside_(5TMS)_872154.19_TRUE	0.041554
Ribose_(1MEOX)_(4TMS)_MP_503578.66_TRUE	0.04195
Adipic_acid,_2-amino-_(3TMS)_553368.06_TRUE | Adipat, 2-Amino-	0.042258
Cinnamic_acid,_3-hydroxy-,_trans-_(2TMS)_653564.75_TRUE	0.042749
Glycerol ((3TMS)) [MP-1.1] | Glycerol_(3TMS)_292962.19_PRED	0.044233
Butanoic_acid,_2,4-dihydroxy-_(3TMS)_409079.97_PRED	0.045001
Gluconic_acid,_2-oxo-_(1MEOX)_(5TMS)_BP_593592.06_TRUE	0.045606
Gluconic_acid-6-phosphate_[-H2O]_(5TMS)_762561.19_TRUE	0.046347
Indole-3-ethanol,_1H-_(2TMS)_652683.19_PRED	0.047339

## Sheet: CB
Metabolites showing significant intensity differences in the cerebellum (CB)
Table includes multiple worksheets – one for each tissue
Metabolite	p­value
Glucose,_2­amino­2­deoxy­_(4TMS)_BP_659366.94_PRED	0.00167703
Indole­3­butanoic_acid,_1H­_(1TMS)_755498.5_PRED	0.0031018
1­Pyrroline­2­carboxylate	0.00608686
Ergosterol_(1TMS)_1051145.12_PRED	0.00802564
Heptacosanoic_acid,_n­_(1TMS)_1053682.38_PRED	0.0145082
Indole­3­acetic_acid,_1H­_(1TMS)_668169.31_PRED	0.0157691
Nicotinamide (1TMS) [MP­1.1]	0.0186233
Cinnamic_acid,_3,5­dimethoxy­,_trans­_(1TMS)_753001.19_TRUE	0.0187008
Erythronic_acid­1,4­lactone_(2TMS)_462181.38_TRUE	0.0193975
Melibiose_(1MEOX)_(8TMS)_MP_914184.5_PRED	0.0212355
Mevalonic_acid­1,5­lactone_(1TMS)_454636.47_TRUE	0.022422
Aspartate (3TMS) [MP­1.1]	0.0226897
Homoserine_lactone_(2TMS)_458933.88_PRED	0.0227018
Maleamic_acid,_N­ethyl­_(2TMS)_459686.66_TRUE	0.0234773
Isoleucine_(2TMS)_318827.91_TRUE	0.0266696
Psicose_(1MEOX)_(5TMS)_BP_573563.38_TRUE	0.026709
Aspartic_acid_(2TMS)_458076.97_TRUE	0.0275789
Gluconic_acid,_2­oxo­_(1MEOX)_(5TMS)_BP_593592.06_TRUE	0.0276845
Phenylpyruvic_acid_(2TMS)_575884_TRUE	0.029642
Pentadecane,_n­_462471.41_PRED	0.0309955
Hexadecanoate (1TMS) [MP­1.1]	0.0336424
Serine (4TMS)	0.0347967
Threonine,_O­methyl­,_L­_(2TMS)_334293.72_PRED	0.0356294
Adenosine 5­P (|ADP|ATP) (5TMS) [MP­1.1]	0.0382826
Tryptophan (3TMS) [MP­1.1]	0.0386863
Malic_acid_(3TMS)_442513.44_TRUE	0.0394165
Rhamnose (1MEOX;4TMS) [MP­1.1]	0.0404926
Glyceric_acid­3­phosphate_(4TMS)_606948.88_PRED	0.0418851
Levulinic_acid,_5­amino­_(1MEOX)_(3TMS)_MP_574704.06_TRUE	0.0431975
Ornithine_(4TMS)_572079.81_PRED	0.0452919
Guanosine­5­monophosphate_(6TMS)_1065235.12_TRUE	0.0471469
Allose_(1MEOX)_(5TMS)_MP_577900.56_PRED	0.0477262
Pimelic_acid,_2,6­diamino­_(4TMS)_654293.81_TRUE	0.0479947
Viburnitol_(5TMS)_635711.5_PRED	0.0486858
Fucose_(1MEOX)_(4TMS)_MP_522432.03_TRUE	0.0489494
Lyxonic_acid_(5TMS)_539863.25_TRUE	0.0498494
