# Supplementary material for: Reduced purine biosynthesis in humans after their divergence from Neandertals
Source: eLife. 2021 May 4;10:e58741. doi: 10.7554/eLife.58741 (PMC8133780; doi:10.7554/eLife.58741)
Supplement: Supplementary file 10. — The table includes multiple worksheets: cell line metadata, intensities of all detected metabolite peaks, peak annotation according to KEGG database. [file elife-58741-supp10.xlsx]

## Sheet: metadata
Supplementary Table 10. Normalized intensities of metabolites detected using LC-MS in cell lines.
Table includes multiple worksheets:
metadata - links cell line IDs with cell line names, species of origin, and genotype data
intensities - contains normalized intensities of all detected metabolite peaks in each cell line
peak annotation - links peak IDs with KEGG metabolite IDs. One peak could be matched to multiple metabolites if they have the same mass.
Sample_ID	Cell line name	Species of origin	Genotype
18-05-02_AV_P4	WT 253-61	human	wild type
18-05-02_AV_P16	WT 253-61	human	wild type
18-05-02_AV_P17	WT 253-61	human	wild type
18-05-02_AV_P33	WT 253-61	human	wild type
18-05-02_AV_P7	Wibj-2	human	wild type
18-05-02_AV_P19	Wibj-2	human	wild type
18-05-02_AV_P46	Wibj-2	human	wild type
18-05-02_AV_P26	WT G.s. 199-7	human	wild type
18-05-02_AV_P39	WT G.s. 199-7	human	wild type
18-05-02_AV_P62	WT G.s. 199-7	human	wild type
18-05-02_AV_P32	409B2	human	wild type
18-05-02_AV_P38	409B2	human	wild type
18-05-02_AV_P63	409B2	human	wild type
18-05-02_AV_P41	Sojd-3	human	wild type
18-05-02_AV_P55	Sojd-3	human	wild type
18-05-02_AV_P69	Sojd-3	human	wild type
18-05-02_AV_P35	WT 219-27	human	wild type
18-05-02_AV_P44	WT 219-27	human	wild type
18-05-02_AV_P65	WT 219-27	human	wild type
18-05-02_AV_P23	ADSL36	human	ADSL homozygous
18-05-02_AV_P37	ADSL36	human	ADSL homozygous
18-05-02_AV_P45	ADSL36	human	ADSL homozygous
18-05-02_AV_P66	ADSL36	human	ADSL homozygous
18-05-02_AV_P21	ADSL52	human	ADSL homozygous
18-05-02_AV_P28	ADSL52	human	ADSL homozygous
18-05-02_AV_P68	ADSL52	human	ADSL homozygous
18-05-02_AV_P1	ADSL55	human	ADSL homozygous
18-05-02_AV_P6	ADSL55	human	ADSL homozygous
18-05-02_AV_P51	ADSL55	human	ADSL homozygous
18-05-02_AV_P5	Sandra-A	chimpanzee	wild type
18-05-02_AV_P27	Sandra-A	chimpanzee	wild type
18-05-02_AV_P64	Sandra-A	chimpanzee	wild type
18-05-02_AV_P48	PR818-5	chimpanzee	wild type
18-05-02_AV_P49	PR818-5	chimpanzee	wild type
18-05-02_AV_P67	PR818-5	chimpanzee	wild type
18-05-02_AV_P2	JoC	chimpanzee	wild type
18-05-02_AV_P25	JoC	chimpanzee	wild type
18-05-02_AV_P54	JoC	chimpanzee	wild type
18-05-02_AV_P12	MN1	macaque	wild type
18-05-02_AV_P53	MN1	macaque	wild type
18-05-02_AV_P57	MN1	macaque	wild type

## Sheet: intensities
Peak_ID	Sample_ID
	18-05-02_AV_P4	18-05-02_AV_P16	18-05-02_AV_P17	18-05-02_AV_P33	18-05-02_AV_P7	18-05-02_AV_P19	18-05-02_AV_P46	18-05-02_AV_P26	18-05-02_AV_P39	18-05-02_AV_P62	18-05-02_AV_P32	18-05-02_AV_P38	18-05-02_AV_P63	18-05-02_AV_P41	18-05-02_AV_P55	18-05-02_AV_P69	18-05-02_AV_P35	18-05-02_AV_P44	18-05-02_AV_P65	18-05-02_AV_P23	18-05-02_AV_P37	18-05-02_AV_P45	18-05-02_AV_P66	18-05-02_AV_P21	18-05-02_AV_P28	18-05-02_AV_P68	18-05-02_AV_P1	18-05-02_AV_P6	18-05-02_AV_P51	18-05-02_AV_P5	18-05-02_AV_P27	18-05-02_AV_P64	18-05-02_AV_P48	18-05-02_AV_P49	18-05-02_AV_P67	18-05-02_AV_P2	18-05-02_AV_P25	18-05-02_AV_P54	18-05-02_AV_P12	18-05-02_AV_P53	18-05-02_AV_P57
X1.41_959.5862n	21.1150488048218	21.7768653767754	21.6112497151318	21.3818360838641	21.3165394080625	20.487696906274	20.1782194766238	20.6378014343784	20.9915644372405	21.130021095944	20.2758236278762	20.8064481310525	20.3971572428954	21.8500438415754	21.2862129684918	21.5429603149201	21.0036871486549	21.5151001705233	21.5452991350306	20.792388372702	21.2820979103345	20.9257846205352	21.2964969926706	21.1064135189304	20.9612396489958	20.7982457913443	21.1489929204815	21.3333525957771	20.7883870485868	21.9747052772154	21.2760571392574	20.8924683586467	21.2215628407438	21.3713263010846	20.5294785220432	22.9386389092868	22.5959322866139	21.9579647507742	18.7152511342749	19.8695145599433	19.712590273498
X1.41_372.0676n	15.2819981960906	15.4751040835778	16.033442340144	15.4275559494296	17.9799765464429	17.7466003925518	17.5899772390352	16.8513306365763	17.1856818772449	17.6321051354809	16.7753840140064	16.1502511973795	16.7276521884995	19.0127570474301	18.6814417702661	19.0932696374577	17.0533846529817	17.0330649933459	17.0683670942809	16.3754972156744	16.4548239083223	16.0446624717078	16.0641426548733	17.8397336938393	16.348224938945	15.8876274509884	15.5139699650521	16.4115143916414	16.294111324916	16.8868727160172	17.2341146261823	16.3656732949205	17.3855416284311	15.8296452549004	17.4220735839888	17.7805221135465	17.7135832923931	17.3426512799787	16.9420366706698	16.6523107524547	17.127578208597
X1.41_1013.6327n	16.350809008866	17.3690727363583	16.9887834935158	17.103236554189	16.4665215628826	15.6469986299798	15.2183661474572	16.3207950615141	16.7830208470884	17.0204052670492	14.8952764747047	15.3591702406064	15.0170177500595	17.0014399198757	16.5115649497253	16.7174335856633	17.1479845052744	16.7060507279957	17.3701644106573	16.870178065399	17.4202780463228	16.8695581058805	17.3597275987598	17.0263212257555	17.1088657071398	16.1532906125727	16.8631905325236	17.4680797310348	17.0058530213687	16.7304441976876	15.9477820598647	15.5632157550102	15.6147940109254	15.2211907897211	15.0208639040353	17.3539501550496	16.85567683177	16.4217642823915	10.9789675055542	14.5942410688068	14.2217752241149
X1.41_1067.6798n	16.4712978381279	17.7136755361607	17.3530429209776	17.1533053180784	16.6858112917379	16.1705693779076	15.6784377497107	16.2393443725796	16.4720328115058	17.222711937575	15.3760327949607	15.8340366349956	15.5967906359041	16.7218103322864	16.033517672021	16.2155382023687	17.1990114691132	17.0621518576431	17.4170311857211	17.207043721663	17.6280079757796	17.1145017136416	17.6639997524055	16.9933878931258	16.9225949389109	16.4568739908436	16.8547490690326	17.3126953127895	16.8705999080419	17.3090645352329	16.3814211250569	15.6096327423394	16.7241084180966	16.7549613204732	16.3449848661782	17.7622486153194	17.4280423066247	16.9192103425888	12.7255569964107	14.3797856773774	13.7587794923011
X1.41_1041.6641n	17.4996387729515	18.5272500919586	18.1221472980789	17.9193675803217	17.6540004848133	16.9121215096714	16.5438381781453	17.0554145513752	17.3378042937397	17.9904007430168	16.2466535562552	16.885861850506	16.4333051380309	18.1825639552661	17.4755127111896	17.693838554741	17.9401827713517	17.9361467402414	18.0813573888963	17.4132976462239	17.8311798885302	17.5026579069909	18.0149507538063	17.8336025384823	17.7873406734984	17.3551323421224	17.8247625631572	18.1976690522968	17.6862413823917	18.007066430293	17.3302670166347	16.8547139619715	16.7917954024699	16.7387097509147	16.2575635527796	19.0409030979808	18.7184027738258	18.0060325497275	13.9064793645678	15.8602967323262	15.1558242704668
X1.41_905.6266n	15.4726919521404	16.7967162113624	15.765352536698	16.4069447797091	16.3217619649086	15.1683489947149	14.9049030795319	14.3361008050569	15.7278889336414	16.0738321395408	12.736095490755	12.7543462217814	12.152768474777	12.8468660682966	12.6981676447872	12.7147997511068	15.164051628231	15.3168853472139	16.6708693671565	14.5020619134029	15.072207168678	14.3547127878864	15.6993034667789	16.5819627429206	15.2297148672557	15.8598042853206	16.0326815740863	15.841859505014	16.5181238650682	13.8063234572024	13.0935598241513	14.122771252705	13.6820534418383	13.767414282243	13.2809107265452	14.4745984959795	14.1508410117158	13.7944206482118	7.35037906071208	11.8181676398785	6.8361363716192
X2.25_1309.0456n	17.1900319704162	17.054668590474	16.817853575228	16.8216216572913	16.4182624438486	16.5135752483799	17.0270240317066	17.0347760656144	16.5860140956231	17.0401939968981	17.388693878392	17.1511177312684	17.5166526221313	17.1970891257983	17.4391342338548	17.4241244090785	16.6486539354737	17.2445302952787	16.8366927760167	16.8773330029096	16.9098538712592	16.9905329305202	17.2682420931869	16.5628562657772	16.9611920403641	17.7984187429475	16.9112508577007	16.6654284052962	16.8566462213265	16.9181828873105	16.838698260211	17.3443275173025	16.8319354487419	16.8627068157828	16.9361222386691	16.8384959791917	17.2158356595105	17.1914895406679	17.2242260146749	17.3514484582438	16.9216221286881
X2.28_1307.0438n	16.6635034418189	16.5722911050254	16.6110765483831	16.5305826639152	16.185415998292	16.3121887661776	16.4790230690351	16.9195685059319	16.3718808746313	16.7760011090183	16.7387845760534	17.0165869658593	17.1985343528875	16.74072353919	17.0778462986561	17.0381277835236	16.4683779809266	16.6884941128704	16.5410190462004	16.7383142007864	16.5197081039088	16.7292781540533	16.977602067703	16.2205164998772	16.5119224046891	17.3636806663403	16.7274188756806	16.4938060299875	16.7467075159222	16.457875332688	16.6561882625293	17.0300832936729	16.3072944928751	16.6171728301304	16.9311027302851	16.7965367816966	16.8714756275947	16.7627260297023	17.3877653785252	16.7432051035073	16.8375475380265
X2.58_1263.0424n	18.7232794975781	18.666515916145	18.5645460307884	18.3863123077196	17.9664802409145	18.303968907124	18.4763043226285	18.8242475751235	18.1378738877288	18.4480462644703	18.8584439520277	18.8018851212089	19.086846105597	18.6087196925372	18.7607644342823	18.6703536629341	18.3470248750316	18.7544809239491	18.3505147685921	18.3900667571481	18.459375486874	18.4823124186389	18.6637279216541	18.2107547576287	18.5624432829274	18.9745671963423	18.411739100329	18.317746076963	18.2512492660808	18.3728880254762	18.5510150624498	18.6700897558644	18.3724410085032	18.3425306489637	18.5338662366612	18.4703881949142	18.7143589845034	18.6405005711066	19.3107285194684	18.8525049750503	18.5558230558763
X1.41_1039.6482n	14.5452246901406	15.8505538740976	15.7795982092903	15.8330245804367	14.8075198710455	14.059595947143	13.2153489680337	14.5878696668348	14.9983369295817	15.6271784862947	13.0347459075932	13.7038311920772	13.5751415815341	15.0595631777296	14.7173341278498	14.8127252641409	15.61951867057	15.2327350153179	16.0508724766277	15.3240711771686	15.7528586184603	15.2812183092706	15.6305484083536	15.2676678791669	14.9712037018974	14.5304664584109	15.3091995955575	15.7652089845442	15.4582209594294	15.3864911936636	14.1972857249892	13.347291510077	14.275709416704	14.1203795682151	13.7314546882435	16.0393021251221	15.6189587088256	14.8929803819654	6.96637250887797	10.6800430012681	11.0947114091125
X1.41_795.5171n	15.8668947864878	16.5044765385161	16.1647019668855	17.0157262293859	17.785305905346	16.3065273929906	15.941336116281	14.4201806919114	16.3520056542575	15.6555298485823	14.3862755443569	13.9108938540521	13.8241684149311	14.5618517130923	14.4432260267273	14.7130544080152	15.3783877861848	15.4641141581848	17.1860988379241	13.9202094082285	14.8132856859684	13.3824345366006	14.898299915769	17.1828218337411	15.1052236264233	15.5945991535314	16.4982165826452	15.8960816932087	16.915095852077	16.3495762793016	15.5798178012378	16.0290697188355	15.7029781915246	15.2892886584039	15.0956704545204	16.6011996367709	16.1398527526251	15.6601582485464	6.76824383872461	11.5309420966294	11.2072672191438
X2.55_836.3612n	18.4604255432989	18.4291563520111	18.3260589933726	18.1580481705059	17.8235044082765	18.088699290624	18.1661273359322	18.4402300436125	18.1442905379825	18.1496837047923	18.6621427533886	18.685899342206	18.7725767415694	18.5210206657448	18.4341128812516	18.3544982423759	17.9591448316244	18.5445670465935	18.0438095445609	18.2608532278575	18.2126346970706	18.3794062111246	18.2458508344426	17.9613534335098	18.2727324825453	18.6478893150268	18.1768351374879	17.9759646506009	17.9786383175268	18.1210233622583	18.278647139636	18.4232726826527	18.2489318086954	18.0989287096155	18.1917759022918	18.1936968917427	18.2858053274006	18.2434024955664	19.0072232210474	18.4780365324364	18.2589986106529
X2.59_930.0256n	17.2507254918578	17.1297917105262	17.0306190394869	16.902077775163	16.6221783581018	16.9727728302748	17.0968351248409	17.2484533528699	17.0639950713719	17.0207122078676	17.4405518153681	17.5436335927774	17.5257358659755	17.2396430384974	17.3819757844767	17.0364004888187	16.8796170935535	17.3035487082858	16.9133589323019	17.1123954624553	17.0859893099212	17.2186970376946	17.1219537606228	16.7039773239876	17.0639746434608	17.4897624779979	16.9168376830494	16.8472726744975	16.8944792420097	16.9299145832988	17.2025777612445	17.3734790399512	17.0620279207393	16.8339259540813	17.0144369827003	16.9640989622007	17.0832623439916	17.1310064007751	17.6906045510198	17.2009968095112	17.0478461141792
X1.73_1131.0440n	16.8019524555182	15.8750609448134	16.1092471642081	16.0174804358404	15.5912704273422	16.043144559768	15.8812228579805	16.5827015192238	15.0207528447734	15.8005507540566	16.308534070694	16.2597341387468	16.6381324099015	15.7473309560194	16.315363658264	16.2323969563368	15.534890059284	16.1671480751526	15.1394190362182	16.0443939981858	15.4811054566878	15.8823205013442	16.2265424057003	15.6398070656732	16.5007715289498	16.7811655613105	16.5013782657089	16.3016871288995	15.3487102690394	16.0572640142405	15.9267358798609	16.5080954661522	15.5039401604391	15.5496104727933	15.5238762529909	16.4410173111374	16.2648698018004	16.5513013810295	17.2795899276156	16.599887974697	16.1129842373759
X2.94_892.6045n	19.5307941273089	21.8142794512533	19.9142246952447	20.0787580237899	21.3725879354591	20.4572543859396	20.7989047561743	18.4616317078604	19.6619967601023	20.5536091198198	18.473738710308	19.7536661861303	19.3559356998514	19.5672806306498	19.9073833785568	19.79128264086	19.8239810721708	20.1013217857597	19.6954748907134	19.1278301965437	19.1980406385719	19.2878317221442	20.3872515600874	19.5393458024665	20.746396649534	20.7327513443409	20.8245195497975	20.6224619091958	19.6693631188838	20.0180245562227	19.2721898437944	20.3870283299624	19.0298023323325	20.2098684966575	18.8113628182181	20.1046256502997	20.1434717624945	19.4703401331146	18.7032375370398	19.9880982595453	20.4190477651692
X3.00_916.6048n	21.6902016670329	23.9778082085591	21.7000227438655	22.1929241712126	23.0540152048581	21.8807074046688	22.348395156508	20.5413280767235	21.6115972787544	22.1119620320868	20.367755407808	21.2484557661477	20.7729771898595	21.3831179378572	21.5363464503278	21.3401115392727	21.5208279627759	21.701951081283	21.6164753029945	21.2448443622287	21.3618150980097	21.3202326936189	22.6051802027534	22.1375822362382	22.5865098194004	22.8167429942057	23.0810978646477	22.4926045303332	21.8260789556623	21.4933778929912	20.6951697872688	22.5554145009816	20.3164900912345	21.7116091565417	20.1441569124662	21.0803344408152	21.0284560062668	20.3466753679501	19.2724950128476	20.8309842432131	20.6228512394983
X3.22_259.0803n	11.1583625513958	11.4617295692968	12.4087258960236	12.8131370127205	14.0331501583935	13.3787178729843	13.2653239372511	11.2721674510662	13.1241461378333	13.1164383137793	10.5032817233511	11.0745875619507	10.2327327070548	12.069049675683	11.5322975291162	12.0066118305551	13.70749954513	14.6288402139656	13.3413427541241	13.2571978630642	13.9962507150577	12.8557022736089	12.8968657495467	14.044744909136	12.6713431830748	10.6009725220505	15.8404789815	13.6456980692806	13.1501010728965	13.6848240746345	13.4365743143895	12.647042947781	13.5441191748523	14.6516279349585	13.2126440837814	13.4218659495714	13.7433786024847	13.0701968032773	8.81345751814606	11.264678231788	13.5320194822479
X3.38_192.0261n	13.6702921252177	14.4435642093319	15.6291594967323	14.9583854400157	15.1335531004953	16.12623859027	15.9643084880089	11.8574338119351	16.246628299259	13.1579175504858	13.0889678598452	11.2139251265465	10.789937290149	16.2463003589305	15.9673876599266	16.0578527651609	13.2324755297093	12.5399557057968	14.4866231484473	15.0739304547879	13.8163021496747	13.7360749775641	14.5541637113172	14.4548344570813	12.5173717080051	10.7704033772236	14.901951991416	12.6924518952376	16.6669991081232	14.9617739764182	15.3650165259557	15.3551520172911	15.3426275944476	14.3952367962197	15.2877935834189	12.2365332218358	12.7298277115874	12.9536076374103	11.0267502854674	15.1423164812774	16.7120097419499
X3.70_268.0807n	19.3356925946639	21.113997890474	20.575000216091	21.2063724027072	22.2023520619357	22.2978032967215	21.9844211051882	20.8713574878578	22.3916165948765	21.2730447493179	20.3725332421434	19.7345947869561	18.756984679428	21.4124534589526	20.6154056901148	21.3237514575743	22.6705429674555	19.9581331503031	22.3838844667773	21.6896597565153	21.2866243610608	20.7829602251743	20.7168152733591	22.9711419130377	21.8134100556361	20.5899759547247	21.0870424489308	22.1504388596987	22.3488808349652	22.600953909681	22.8085763677627	21.6831137458071	23.0153332669642	23.0317693381881	22.7116045620107	22.0519542359769	22.1350157961615	21.6107713465315	19.2290629586411	20.8334683902758	22.862437242734
X3.77_289.9933n	15.6302318750277	15.9692315570374	15.4426552935611	14.559769449466	13.7407489084997	13.4997713054078	13.6223784360592	15.4611497387274	13.9726466694551	11.3102059963596	15.6438004220986	14.7917711827254	14.7271849998004	14.5044441073808	14.3435229943318	13.6630390754547	14.4228265731919	13.9714377728244	11.1706022778734	14.4408380655519	13.1994792738046	14.5854462087167	14.8824833627269	14.4768225015354	15.4756180118675	15.9589804076269	15.9471246522617	15.2197130409013	10.7788756342277	14.040719238248	13.1307263378592	14.6745301994618	11.8764281710186	11.3555911861221	12.0454159817609	14.9996534078466	14.9016186492521	14.3968268797477	14.0962712232508	15.3449127576833	12.4735545341991
X3.38_230.0002n	15.9486557241931	17.717099727577	18.8925934969254	17.9998893552489	18.0766990584306	19.2161666631473	18.9710609943642	13.3961748241694	19.0487574927949	15.4678365641364	15.8676446039221	13.4352692013642	13.5211529459177	19.3374902939682	19.1155305682737	19.1062827986067	14.8034785083689	15.1966845613712	17.2932081086564	18.0483235853167	16.3870025499973	16.5563953876111	17.5649975320528	17.210030101148	14.8190697855281	11.8001639615406	18.1776375188531	15.1036101515768	19.5301186332621	17.9888178170082	18.4305934906454	18.5785434596247	18.1937046628476	17.5266177374068	18.1837514577279	14.8206567034697	14.6596244788508	15.0374703157342	14.0232050130102	18.3847595240935	19.6004803360994
X3.95_1313.8561n	11.6355749434698	14.2391359267365	13.0974628635328	15.1386856895777	15.9710411497752	16.3500104389471	16.4249678015004	13.4627039719671	13.6537009684523	15.8620904401868	15.3982340802916	16.2074238290744	15.7511513049596	16.5279308958461	16.961838896672	16.5342361945935	15.5179411828776	14.9481830647766	14.7991579466862	15.9740216050723	15.3785428922258	15.4537221127587	15.288779562507	15.1195561539654	15.8260567172643	14.3962569773629	12.8227380610949	15.9555192211532	13.4263802924308	15.7374791016597	15.1780835760028	17.0574355396623	14.5769791661498	14.2268512793416	15.1786646982735	16.0529228845474	16.7148110958972	16.2256004577003	9.49359094080022	15.4181039670927	15.7578066510398
X4.20_316.8408n	13.347864447585	10.4272283015854	12.8584057341532	12.4940519928537	11.6256678666158	12.0539158478235	10.4476006702058	12.8532826896113	10.7952197264268	10.8086109100593	13.4499260425961	12.3399643840543	12.0652289793797	12.2031826479173	11.513926133299	11.3813027928914	11.4109233231792	11.893812297029	11.5510207518734	12.1990477907055	12.6785291702534	11.6223790130309	10.4888094346302	11.1434575267012	10.5218122434768	9.73953093981504	11.7951535522029	10.9192280712014	11.6173314188092	12.6501215157735	12.1243718034436	9.37792160191151	11.416726485724	11.2963990188965	11.2997037794827	12.4251513866692	10.7079157993517	11.646187528805	13.7867268309316	12.0087641623705	11.7026814850992
X4.33_323.0847n	15.1917857141986	13.4281735756421	15.5024349125884	15.4251293550883	15.1771779601749	14.8909474128792	13.4875201097509	15.2302341555322	14.4892648430272	14.2516279758335	14.688607507188	13.5196478038507	12.7302066218964	14.2930094591897	13.9181985794873	14.2158120761938	15.0756559337848	14.2397926832145	14.9393744101004	15.5517330324448	15.2517474810735	14.4318378930111	14.0737394254849	15.265803332561	13.9953712042701	12.6397886748466	15.0792730812008	15.1025908834516	15.2620372238834	14.6493372278163	14.3044299530871	11.2787412992938	14.1965739314153	14.739467163515	14.0241782006076	14.3746983483627	13.0305320910128	13.5082921101147	12.1323298485479	12.3835436508384	13.9850705549268
X4.35_401.0619n	14.0034310015872	13.190836618308	14.2177012265893	14.2013874454655	12.9150204862282	13.0146604965344	13.1587470321113	14.4310679665192	12.59870717686	14.0249341035597	13.6722564720156	13.1682591929664	12.6879409401022	13.611536867486	13.3487311596407	13.8117637438891	13.717831594869	13.8975648000954	13.3868789305546	14.2087906113581	13.8234827591282	13.9950146315299	13.8257741412061	12.7779864935002	13.8206373536529	12.9930740160145	13.9132770441638	13.5487475741174	13.560209628901	12.5016178543178	12.8414224214254	11.3241633697373	12.6771207143973	13.3140569380809	12.7785037644632	12.6214028827886	12.6105549724461	12.7782419110873	11.3670674407904	12.1607222878127	13.0256752977379
X4.45_172.0126n	10.0658573317094	10.684715456372	11.1476709200966	11.614116212899	13.6534808125572	12.4032150883878	12.2210292903902	10.6587635208085	11.9278684618066	11.4536948176446	9.92244923223667	8.65702083153069	8.05673876980874	10.0238306553502	9.26245366369959	10.489247508678	12.1117484224801	9.00618772266285	12.4706257195705	11.6591303534205	11.3874117805087	10.7833832899385	11.2563370194232	13.2952585718558	11.3188709697465	9.86302839045756	11.2256500998598	12.1689806379154	12.2222168971548	12.4403888069944	12.3844695069364	11.919519735903	12.383587025737	11.9434060135036	12.3941214753638	12.3850383735896	12.155243302446	12.1842215658363	6.84622314039858	9.72388940990488	10.7210298610682
X4.28_218.0897n	14.4150659447488	13.7546370301256	15.0188704624508	15.3556462241017	14.8070356139397	14.8624046582707	14.1907209717698	14.9114157161671	15.5049808852497	14.33740371089	14.5366068641172	14.3037718006316	13.655323644609	14.4933236345596	13.5436027148647	14.0061304384927	15.6263634528488	14.4812890530079	15.5686694143088	14.7872552496081	14.5073314322526	14.201359653006	14.3594532844199	15.7319980491177	14.5049955423304	13.6915016823833	15.0806302098768	14.7779789278662	15.7032514352776	16.3608337350222	16.2353308928649	14.8951915548015	16.8616232637516	16.3906734477337	16.6967782472978	15.8522292397736	15.1970546462206	15.5276194611602	13.2005632443558	14.6223862455031	15.7998209466439
X4.64_623.0780n	13.975677802776	14.1328807610094	14.47098955324	14.43969848547	15.134063633551	14.4090534295841	14.056697070813	13.6253851084861	14.5578871805815	14.1940143727359	12.0502232036991	11.9272837035315	11.3914829680912	12.3574051395658	11.030102914612	12.2573097983808	14.5596713443975	13.5854416126762	14.5079995795455	13.9682047849541	13.9323700822323	13.7559683166618	13.5487759182917	14.8921195399821	13.7185394453906	13.3950467555033	13.9589304275341	14.0038039241809	14.6740738275131	15.0755626114984	15.2070949106525	13.7080910131139	15.0568933125794	14.9849751649371	15.0980297072526	13.9906097552812	13.8764870191584	13.9587992550538	10.8132511299418	12.1766616168034	14.4423454913325
X4.72_305.9885n	12.769216262585	12.8212118000951	13.863341601492	14.0398989913887	15.2817569558631	15.9829991593607	15.4958927728448	13.750663242107	13.9033026195446	16.0393917377528	12.9987977045734	13.6145566888475	12.9237835464772	13.8837042809351	13.7363305869792	14.8031311210811	14.2436284546497	14.3251981811642	15.0675498125339	15.1242778505319	14.9885629329127	14.2243768389615	14.4532423370524	14.9270725961054	14.6847305885111	13.4519670271701	12.9868481208514	14.99123897063	15.2650498650921	16.2246684908639	16.3408513309771	14.8231441744764	16.0866909646203	16.8260815949448	16.049507438051	16.0502827259342	16.0683497633845	16.0686673108059	10.2732151178458	13.5228831219106	15.2307661653203
X5.05_131.0569n	14.8170850070413	14.8288716622198	14.8072769198285	14.8512646346305	16.5480930831206	16.2774986275096	16.1305546142718	13.9705356797075	14.2813037952743	13.823770660215	16.4405802442663	16.4950363071746	16.2340593938461	15.4441444245073	15.0880283096272	15.2734251463415	13.9114437051625	13.6308345248395	14.0157203900088	14.1380510771914	14.0372195877263	13.987282806744	13.6778387062322	14.5537359236638	13.9404660239816	14.460211257711	14.7056634385654	14.2885468509215	14.5636908658443	15.9410282029041	15.8861578924181	15.9942219808653	16.224059072258	16.6688046814993	16.1793165911492	15.1363261651173	15.0621694222943	14.9699740390125	14.7945594923944	14.8109899184717	16.4615080178311
X5.10_189.0629n	15.8446420186094	16.6991610499137	16.3775173961801	16.1632227646266	15.5300487566449	16.3357127923875	16.0525789477448	15.4057968277175	15.4494889741913	15.8166157088877	15.8559589636122	16.2405739421585	16.0510542325235	15.3379579453338	15.5371275208833	15.8001567204606	15.3654704468778	15.1616526173048	15.8861912246783	16.8516112331297	16.3051715258546	16.6851453966761	16.7641752135125	15.4155215423783	16.3879105963921	15.560911404406	16.2635795479386	16.4710602152235	15.7840871755665	16.0401976983669	15.7742931980879	15.9625219218743	15.6085058725128	16.1848186251105	15.6079385807837	15.285552192917	15.0993917720068	15.0877238741552	14.6404918059785	15.5313476539046	16.4052997358071
X5.30_279.1220n	15.1601488294685	16.2043005321757	15.2866921198533	15.7451127015339	16.151191615478	15.4369585832995	15.7614347352518	15.1585776186294	15.163817104032	15.7882874504225	14.5631194105872	13.9688043690651	13.8109694821404	14.0798862270801	14.1124974277524	14.4224416712435	15.5511920728066	14.7754646188829	15.5427866310515	15.6587645903434	15.6439181629779	15.5810169724095	15.9266254698334	15.5999481652378	15.3398478951534	15.4237754196751	16.3531774434817	15.7911091264015	15.5151945575793	13.6282127365084	13.3774836788909	15.5015449111204	12.8701373915109	12.1497008960074	12.8845467403441	14.8404760589673	15.4033930879143	14.7765869601379	12.6973033287212	13.1474828744992	13.1306786582854
X5.03_175.0471n	19.8177713432801	20.0228160010375	19.7520448466284	19.6265493198984	21.2861161568507	21.0528508346788	20.9386811822868	18.9537548978385	19.0587552159044	18.725463703222	21.3125345026196	21.4346939903722	21.1883674555913	20.2889242134688	19.9422426728341	20.0518791395339	18.7100088707754	18.6140323437464	18.7428549849021	19.0402171509231	18.8479835978086	18.9477513853622	18.6219362864931	19.3845430830146	19.0261015785586	19.5300677119791	19.7044607314312	19.2172349730658	19.3540081325074	20.6966966369832	20.6257500232673	20.9018724266835	20.9209521817433	21.3930734229136	20.844779166935	19.9667755095695	19.9325005971867	19.7722136385198	20.1502650813411	19.8136137682576	21.2325931574613
X5.33_306.0953n	10.5080088204314	7.58703146609381	10.4975505846757	11.23272951616	14.9218917241779	14.7018378952976	14.3612265732392	6.82170091904213	10.1691111674135	7.18668147236106	14.4412023103472	14.1944369307867	13.8747255558115	13.5808273466399	13.299272966539	13.7264291491758	6.61989460004953	6.6889732940752	11.0404765251147	7.61820051192993	8.41895847622189	8.74574794523684	8.56884761934636	11.7785106005663	9.57173134052045	11.7924885809922	10.0755427492624	8.27340485178148	11.5897933733062	14.7177974978093	14.7851564722765	14.7211745684436	15.5564571280285	15.904675802218	15.3063515860551	11.8599260270793	11.7155755952675	12.2474668741049	7.04493916601453	6.93241176359188	12.9970329996144
X5.39_247.0689n	13.0797494561629	12.6574067250889	13.0995163527374	12.8854887935785	12.959055419317	13.9200840165769	13.3795071124188	13.3412614688059	13.5467541939682	13.3592167655049	12.5149210117705	12.2335917967427	11.8441293146357	13.0302038579477	13.0652886136286	13.5573683951665	14.1319358326438	12.8016999928225	13.4748288342765	12.7073012934887	12.7502124215303	12.8558260865648	12.8712359839878	13.4843789549456	13.5520590850119	12.5113528456951	12.9759838611315	13.342948802837	13.168332744512	14.4884372934444	14.7455560960873	12.6606433852119	14.239569161561	15.3072308845187	14.1885736262347	12.907040760895	12.7138483544313	12.911702334115	9.32655150249952	11.6583615825321	12.7660404460961
X5.42_294.1220n	16.4971798162197	18.1602780207851	17.0057014161369	17.4835115887651	18.0352836481465	17.4960730348011	17.8488994750136	17.2134718823922	17.435693448497	17.8750714775439	16.5145375151285	15.8877907567331	15.5476825662812	16.2305866207056	16.0005761253678	16.4455277683292	17.7108956177242	16.4466278504907	17.6287034632939	18.1166407083387	17.8310190334337	17.8987721474811	17.8542994275256	18.1765658361918	17.5764461604009	17.0361333610323	18.1820930424325	17.9737967293736	17.5595319501712	15.9064173770152	16.0739103306884	17.43649181267	15.7876136535459	15.257335518702	15.7546243270933	17.0342058632644	17.3580251497389	16.7780495671421	15.008789661283	16.1586393057065	16.2432666121651
X5.50_246.1213n	13.0571320943717	13.6914977034486	12.5082569359493	13.4465371051352	16.193004226445	15.3287251555973	15.3620467064222	11.9243274994765	13.1064251252247	12.5272718923302	14.5064961108085	12.8249037947005	12.7823827882604	13.741779553091	13.1510869944244	13.4280014535836	13.3166288470551	10.9417154357419	13.0925913550915	11.841305145778	11.8773850711241	11.4940138881042	12.1205842109542	14.8120580877209	12.5767383470165	12.5937506205066	13.7947857335311	13.0356293043417	13.6585479300879	13.3304337416708	13.1218779650379	14.1381914942401	11.4542729832811	10.855066065218	11.5394345021122	14.0505139775092	13.9330451336487	13.8453139302792	11.1505555953511	13.2244870361425	12.6634954456956
X5.54_405.1026n	14.2447407979927	15.0993545532134	14.2087367952353	14.8324182298345	15.5576585484714	15.323228026204	15.813538680965	14.6580207973083	14.8174911374082	14.2596638931822	14.5312312458005	13.0820254805679	12.7078917956365	14.5971187722266	14.2779041560271	14.7488873184976	15.0354998942466	13.806839859996	14.8055359365534	14.8933944941956	14.6035009173261	14.9515797646099	14.6346338559127	15.3428178656407	14.6356675544268	14.4485065984473	14.4951441329702	14.6212945627383	14.7204775154909	14.0467727893877	14.4060595870202	15.2513074949634	13.7392095212074	11.736954724954	14.0367411702886	14.7809689923947	15.1590016365089	15.0450978139899	12.223919596266	14.256829293401	13.509408009468
X5.61_345.9249n	12.299577493395	13.7713877079337	13.2804410047906	13.5754166483341	13.619360271803	13.9466878931926	14.7059070931506	13.6335327544245	12.9159377205739	13.9988505872856	14.5689152837989	15.3938885879033	14.7659634262462	15.6698625793307	15.5760905752039	14.9856941212754	13.7662362941684	14.8669002466918	12.483825195697	14.0543942925267	13.6041759977375	14.60931537225	14.1865205827125	13.0375327228981	14.5753098856384	14.8077356937625	12.9057184031924	13.9276775442874	12.3622777148594	13.5902159721186	13.9507233884419	14.0032346617883	12.6225618235868	11.6117069658968	12.3727717717271	14.2104482320607	14.5899555586896	14.0086509923457	12.8563461229281	14.6679518298531	12.9640249592094
X5.63_209.9688n	12.5690173175861	12.6003433609551	13.7961412027988	14.4651964163923	15.4727300851922	15.7476504259692	15.2740242305504	13.9214996300788	14.7672755874719	13.8533165233471	14.8502474918376	14.9186211068557	13.6725106683699	15.908245862899	15.276106923391	15.0390320658603	15.395259005263	14.8129686343631	14.4058564157739	15.2457444985325	14.9715692064009	14.7597213106597	13.8373087467708	15.2886376643653	14.2319192599164	13.2186485340771	12.8207834624685	14.6382664523519	14.4076274214893	15.8610053443248	15.8507702656676	13.4731695967624	15.3991481344119	13.2833540585574	14.2705259605254	15.4993220087061	14.7674200504118	14.3456504501125	11.6652898796784	13.7838149124768	14.3346334620548
X5.72_317.8766n	16.4439122996025	15.2324195737204	16.356924787534	16.4088008174726	16.02106560289	16.5700366298042	16.1695732683205	16.3996006674428	15.8786107445864	15.9615077171687	17.0374835181	16.8224635085936	16.8128895444773	17.0510136471506	16.9193131456182	16.8972915488461	15.847963615707	16.541267346273	16.5867973364024	16.6187626442405	16.6649217017889	16.5040244445467	15.8860548372634	16.1217735527203	15.720972775937	15.6136243901729	15.5223566059205	15.733262942287	16.2793431701063	16.910993578811	16.9387573294261	15.8997009666636	16.9198148718514	16.597468522446	16.9038872392264	16.5936170743905	16.2782321264241	16.5822108571724	16.6339851893314	16.4832004895151	16.7850915804689
X6.17_533.7977n	15.9175915994537	13.7165542726879	15.1399097416567	14.2347245017703	10.2128001982503	13.27375149283	12.6395651349848	14.8229807380523	10.8400200201299	13.4996674133126	16.229119951775	16.5488692821687	16.5817963795125	15.9972173965684	16.1520727006458	15.4627214448954	10.3132539844997	15.5516381729451	12.8096686081512	14.6932954176419	14.6745688721425	15.0775126565613	13.8856088259288	10.6745004111046	13.45205676227	14.8905307532773	13.246548419425	12.7342138559237	11.1783330832507	14.9408025224034	14.502114576392	13.6403848198821	13.3128619653449	13.9786799840341	13.5445594319642	14.6283020972201	13.6837493511664	14.3457683958342	17.1870879925858	16.3277381810464	15.0429241599867
X6.19_275.8795n	18.3655132987953	18.2794937826741	17.8855940044925	17.18198321123	16.5805926396859	17.2260443590567	17.0571533624236	17.6551752965949	16.2904228304357	16.9809453610002	18.07306259101	18.3266666524421	18.0964329153381	17.9008955678961	17.7658150757298	17.4566735778014	16.2429093326238	17.75199648794	16.2727473269298	17.4798375437234	17.1639003142679	17.5870808893184	17.1506681273686	16.3709682447908	17.539186178828	17.8145851614363	17.8315391225121	17.274657720359	16.2521235566474	17.5369668976736	17.2066368917515	17.4395848480758	16.7830727525266	16.9530658668494	16.6655707327741	17.7364262640417	17.4467701899299	17.1347159891342	19.1925343142157	18.0190787707718	17.2719183060253
X6.19_237.9097n	19.8493485199255	19.374133702375	19.4595974874339	18.8543461401448	17.8132725267055	18.762195730899	18.4537495357469	19.2767624613984	17.8206552523388	18.505559746783	19.8936173401783	20.0708070274675	19.9717889062498	19.6522243551208	19.6448972107733	19.3301345391119	17.7776384958875	19.4171678605923	18.0610235905685	19.0637892847197	18.8619588555313	19.279031922802	18.7058397281371	17.8536481495635	18.9584935879764	19.4241697162268	18.9092860392853	18.5890907657349	17.8628967486727	19.1615162673672	18.9862134698962	18.8073985908718	18.5842206338226	18.6898965205795	18.4996700565008	19.1531310489246	18.8112976086881	18.8505690796371	20.8275183881691	19.9097357905927	19.1402593877157
X6.19_315.8878n	21.7466453408261	21.4001079218868	21.2375666161573	20.5379463272685	19.3845854113254	20.4024005328528	20.1008659035307	21.0421519460368	19.2923655651046	20.187088719534	21.740424080467	21.9397104954422	21.8846750081568	21.5082095081599	21.5099176724124	21.1058249783628	19.2581646944118	21.2469192915145	19.5590276570464	20.7901332041866	20.5298975780474	21.0469360994344	20.4622204565959	19.346750465824	20.7863096560833	21.3422687171314	20.7561291520535	20.3329508371237	19.2789765256315	20.9002594891873	20.6490779071182	20.5848691642245	20.1400545107703	20.2955376204487	20.0622146907767	20.9501885924611	20.5867524824179	20.58493753726	22.8353439537415	21.7928338350502	20.8612823055366
X6.18_413.8646n	17.2405540239096	15.7575955767568	16.7229917781422	15.9893161528338	13.6507884334122	15.4252139680885	14.9533809279979	16.4038691763621	13.8938044494816	15.4342673156479	17.5117827367743	17.7672314981707	17.7760892038355	17.1768269356828	17.384246433195	16.8719619285559	13.6845456456678	16.932989666819	14.869771561508	16.291818197305	16.1654869089307	16.6209928737118	15.7107318356083	13.8528319609935	15.5871719257833	16.5874922695552	15.2494462458611	14.9800294629764	14.0486800416518	16.3966847298548	16.1573340129693	15.5948598434632	15.4019074589611	15.7992707569602	15.5332155823199	16.1391366893014	15.5467979185234	16.0473380440114	18.3818282702347	17.6113260130835	16.5942468444272
X6.17_473.8315n	16.5590967513011	14.9173025046515	15.8563044787795	15.1756923292571	12.2061322098289	14.3349770014626	13.8394360236706	15.5731313826354	12.4017529618795	14.4154845933688	16.8819747608063	17.1625383399691	17.1547714936683	16.5404826308139	16.7545873477364	16.1916259320846	12.0974091694191	16.1787769590318	13.7439809475522	15.5375700316304	15.3416858358294	15.8445891011461	14.7067542570327	12.4767166438589	14.5803971757823	15.6812052957029	14.1991485412506	13.9411830215095	12.541481853876	15.6303002298784	15.3506470428221	14.58917334266	14.2363179573093	14.8589365199804	14.4178405615673	15.3765528047605	14.5996704124054	15.1950528748349	17.7919361838194	16.9083833371112	15.7673588624813
X6.17_353.8981n	17.2887980743696	15.9569314452152	16.8903261370046	16.3671969678831	14.5705831869919	15.9498936395759	15.6549346766726	16.6045404257733	14.8342168972399	15.8790503682462	17.5701239486032	17.7581545655433	17.7032027670605	17.2249771671177	17.3403692329081	17.0262687920821	14.715865852907	17.0249420853902	15.4978688786624	16.5676659360131	16.5207530777127	16.8249173477404	16.05028153125	14.7888274810694	15.8675731875784	16.6333069545502	15.6367197829924	15.3881443998623	15.0804894901841	16.6023178064289	16.56217216301	15.9892061839245	16.0572298650102	16.3208729174223	16.1147688564839	16.3266370246892	15.893941878654	16.3444005638492	18.2183667742592	17.5751443167505	16.7958918866935
X6.17_417.9736n	13.1687773740966	14.1875851094507	13.6369426424694	12.8264857125068	8.45204801668127	11.3706134382641	10.6739558719823	13.6025281137647	13.0209850262701	14.8579976859408	12.6061711933491	13.2009574968562	13.3755944091411	11.0887022961087	11.4881985685601	8.95049764470681	12.4897818231549	13.6599868760486	9.60885979422415	13.3519004543282	12.4766341368264	13.4346888869399	14.0478107071414	11.3112010354355	14.3278201688854	14.3347960393009	13.402319182466	13.9723267685399	13.3165368272004	11.4354622413021	10.73096169661	13.7097432855232	7.3093646999773	11.1557411361195	9.23892243176287	12.5928850069941	13.2341195578082	12.6965798061098	14.030074296934	14.0790350286051	13.4088415997399
X6.06_414.0525n	16.263899641728	18.2419332927793	16.2626165691475	16.3843737805917	16.910073490664	17.0662728278511	17.477291209492	17.0815112362148	16.5392997696056	17.1285913110674	15.5277994677064	15.3569212801638	15.1118136933279	17.0488285281154	16.1347871734386	16.3182281646586	16.8713728173268	16.4929761441479	16.2397712286072	16.6894602627041	15.991739336885	16.4123877463234	17.4788472354714	16.9327742977629	18.2103055881442	17.8713614432999	17.7602292625239	17.7122393140223	15.9950719590933	16.3345723048542	16.1146867022786	17.710170523821	15.8472827479769	15.1776577782377	15.7610762824738	17.63589618288	17.9007647737351	16.9932037391579	16.7219834301811	15.8875565951961	16.1980995889977
X5.95_247.0802n	9.2634823158347	8.88724439413358	7.69054170390737	10.0304580967647	13.3871247894704	12.3075263552836	12.3198097273414	7.50853272092889	10.0519195013778	8.47619044636035	11.1496852216539	8.1591948384154	7.786828796388	10.0157424779001	9.65996763167932	9.85067519840326	9.70865589730773	6.78016380243018	10.0745699312626	7.85433868334245	7.67687650127158	6.61917203592755	6.67612828308223	11.7998128190449	8.48354291174134	6.88477212501438	10.0283526322963	9.17251409146639	10.874004120908	10.2666339309612	10.3095468386193	10.4311446755053	8.81702374807992	6.44452602021298	8.28314024490199	10.4718331115047	10.6628932094116	10.4759641303465	7.04275927255235	7.96396051767166	8.42816773096821
X5.73_197.9570n	13.8873974232196	12.295853820806	13.8250281647361	13.8349750566624	13.5051616363791	13.9210551427058	13.4251125342383	13.9624821147902	13.6419731503387	13.1652702961929	14.403711111539	14.022619022014	13.9438587470738	14.1070498517533	13.8532443180941	13.9737738685631	13.3355803944553	13.8498935493612	14.0425303445394	13.9345385810916	14.0131851840574	13.7289815105955	13.2067162150879	13.6620730018458	12.974603921846	12.744829444093	12.9392435593628	13.1060436695143	13.8847564470899	14.2095833177043	14.2549889679956	13.0150596155908	14.3348563882928	13.8543347505078	14.2217363114247	13.8368032238072	13.3837091457683	13.7526871469474	13.8233727427662	13.750378866098	14.0672421689315
X5.73_237.9096n	18.3659011959859	18.6305050136671	17.9966617524526	17.5715598256938	17.3483087849524	17.6532051148357	17.5428136328951	17.9143060331103	16.9525018173133	17.3248268762058	18.4624290597211	18.5310421846075	18.5155725910291	18.1742029243081	18.191176239033	17.8489899653542	16.9863565450137	17.9719554197661	17.1508099692601	17.7690847330439	17.5892502574249	17.8458201845699	17.5207353906524	17.0697100072642	17.9518964833352	18.2003312899503	17.8345988384727	17.606092208472	17.0439585471634	17.8736127952681	17.7614257025681	17.8613656821193	17.5306342369535	17.3515492413323	17.4379782966646	17.9338727802355	17.866539962545	17.6360884473649	19.1413102084366	18.2759621763765	17.6413121847702
X5.73_177.9422n	19.6716349120332	18.4690899792092	19.5683744680464	19.3784298216952	19.0600383233172	19.5006200290991	19.0578048553792	19.6172662295979	19.1567066468777	18.875570768061	20.1352557041816	19.8085769499833	19.7559637063149	19.7603188615068	19.5563378713202	19.5914249325999	18.9323763405046	19.5297806647659	19.4112532148661	19.5402555500203	19.5434085862796	19.4671569584242	18.8783972217097	19.1642815134597	18.8284076986544	18.6783304835544	18.8344659645885	18.8255639211946	19.4114183889713	19.733069484766	19.8219523858259	18.8533227371388	19.8459442553106	19.4592852367221	19.7069778030923	19.4401269952958	19.0600120078838	19.3418543807336	19.849285541573	19.5821340905343	19.6543680874106
X5.70_197.9012n	18.6563044640405	18.3815242544355	18.3103671894481	17.8191765815323	17.6541380371715	18.0012181701584	17.848374808259	18.115492147132	17.1548514483851	17.585106481637	18.5505077688427	18.7353344115728	18.4602289268619	18.3956464035278	18.2580385457826	18.0104189966605	17.2210097751456	18.20776735646	17.1232317016379	18.0432079215125	17.8023146399861	18.1083479843366	17.6738922782231	17.3537639413623	17.9645968273682	18.0163289264895	18.1794877769797	17.8953686718195	17.1320835235794	18.1563565578519	17.908471357781	17.9275312767006	17.6002574729711	17.6073931779105	17.4112432870732	18.3148296545076	18.0759427104492	17.7766671479948	19.2927314038948	18.3584062751583	17.7987956684937
X5.63_275.8795n	14.0681431282476	14.5018670154757	13.5215728024845	12.9184519011002	12.7385462130358	12.9636782906922	12.9232868910037	13.3303393177974	11.9488450505248	12.7104816568206	13.8509212056141	14.0839539921247	13.8852718480566	13.4748975061821	13.718909489133	13.1310761072657	12.0314771081127	13.3054472888608	11.9905130922522	13.1332878478386	12.9810075941213	13.2386683635591	13.0831498267362	12.0751405384743	13.5973201196268	13.9880470343261	13.6097514661883	13.0770462383496	11.5799887702308	12.8772772307386	12.5515111766029	13.1852944586513	11.976081930618	11.5153430997463	11.9379176328525	13.5369947676953	13.5069568225484	13.1792077553883	14.9511668071871	13.8532836900912	12.8322442160559
X5.63_251.9255n	12.0339605895165	12.8137150976076	12.9440845171975	13.6250674227408	14.3966362923371	14.6149172563866	14.6148387503834	13.2956854945706	13.4023274533573	13.393812908544	14.3739023426811	14.695104701935	13.672117998315	15.4617178403313	15.1257577704963	14.5980307723653	14.1667336425133	14.2421272713448	13.1731842287482	14.3415008363523	13.9884336557116	14.1598213113748	13.4287520826382	13.8401993595128	13.9379323759589	13.4482909676752	12.3428868074439	13.8337597672141	12.8515137753151	14.530623530828	14.6106740803313	13.1392110261626	13.7425692690478	11.6420674114265	12.7874581288952	14.6639351055548	14.3933472348777	13.8738016047557	11.8805065079201	13.8207633960436	13.4840870816279
X5.62_493.0290n	8.33417917675184	7.05007079202861	9.64801215589891	11.2079782846495	12.5748424552575	11.505946685171	12.1941324801961	10.8808016758267	12.0915377214042	11.3976567289491	10.5396930785209	8.10053363384239	7.0236351716532	10.9476567497089	9.89721467327251	10.490425301054	12.8334241137719	10.6234411552685	11.4787254739247	11.5335498976245	11.2046959615757	11.730737937605	11.307724301376	11.7108865323598	12.3737512942688	10.3902799783735	10.514157955331	11.7157699142821	11.324769778781	11.7321613231585	11.7404916185845	11.3357682374287	11.4475041495159	9.49756202846073	11.6905554159358	12.0515149909975	12.1836012492755	11.8039745941176	6.88350533715037	8.73531666566368	7.48420285411285
X5.63_421.8963n	6.89795320203183	6.91441778346721	8.24552030885667	10.0411733585976	11.2392019264221	11.3674341295118	12.0936776225801	8.82454355911636	9.8610318534139	10.843013866025	10.5258104891323	11.8272031252081	10.2819677577094	13.3984816219896	12.7642996935519	12.2924961303936	11.726666883254	11.4746347050187	8.96011975345624	11.0092634845828	10.0670874043168	11.3080490213366	9.87133781837444	10.5729958248872	10.5667177782526	9.58249778591336	6.68913968740763	10.6415311455601	8.8217149900731	10.7160128001113	10.9972590412927	8.99332514908757	8.7573779216781	6.59614078460003	8.2237478668166	11.3809949761942	11.3696072571347	10.6263334039747	7.12172876801313	9.94615262475332	9.50954568726502
X5.62_423.9023n	10.3237397126594	10.9039990761159	10.7373043187953	10.9386408047466	11.2333526670068	11.5399479038402	12.0661447370475	11.2277919791419	9.76072016034066	11.6053286344536	12.1708776705344	12.9044036280802	12.2670994842467	12.9772971072911	13.0102303998451	12.4511690606617	11.1926777379217	12.1901253180175	9.89068169254249	11.5556788176366	10.5918695471532	12.0875758125603	11.5744591706227	10.4669403916996	11.8700409086934	11.9744610930919	10.4413955726693	11.2551011421894	8.69117110130258	10.980302900539	11.1001061979519	11.4163767513457	8.304548209475	6.52059146315419	9.53741177852809	11.7162514246153	12.0995908082505	11.6071712627167	9.45104409310142	12.257658935593	10.104762831673
X5.62_407.8809n	11.2704114885992	12.1086849724676	12.105984695791	12.382371014324	12.611236676622	13.1164749039763	13.2492413510948	12.3465576078203	11.5548756380551	12.4518476050664	13.5753382978903	13.8852751576277	13.1448787182633	14.0952382873651	14.2085778026426	13.5344882076083	12.1809184401459	13.2068452105283	11.5310686777553	12.935008236789	12.6524240619791	13.1321556290461	12.6053011390049	11.8756987057986	12.9939902902851	12.9514891342859	11.6087305351043	12.5206645363655	10.8100837503532	12.8433912974036	12.841503288423	12.2348671496501	11.6281492606194	9.53594326871607	11.2795540217742	13.3986164676438	13.362337696939	12.9163836958952	11.2903417040126	13.2207172659564	12.142289997981
X9.73_447.8426n	13.4590220208452	12.5675517011208	13.4806506002416	13.2565481013987	13.2133049820204	13.2200393739827	12.9484103679704	13.2792040413586	13.2000429062693	12.7446037436905	13.3816520488776	13.2073322603532	12.9395803403484	13.1692017427276	12.7637050260168	13.0235035687149	13.2710722955641	12.8749616366789	12.8249628753981	13.2263236453531	13.0131020635628	12.991195076546	12.8344072084509	13.299363305965	12.8246891258428	12.2722458862501	13.4019863708837	13.2255738615642	13.0166804660604	13.3409488218874	13.3819605040344	12.5785015402315	13.0798234391949	12.9491017386944	12.9921870391006	13.5146237844377	13.2148429580553	13.0111403980492	13.1579606254188	12.9196715277284	13.0375451176701
X5.62_361.9295n	6.73961680634303	10.3150639811297	10.691273561054	12.265635593526	13.6593411406711	13.8159582363736	14.489233446304	11.5880460766295	12.6750671827987	13.0357088117129	12.8056257312585	13.8584105007278	12.32759678152	15.6916478481601	14.9136048076706	14.3699629163404	14.1369778240579	13.7356770222591	11.638739298892	13.3379468611948	12.7610328255155	13.4088449539986	12.5467628636509	12.905432265607	13.0812314704663	12.1638340059627	9.42819491379022	12.9727324303328	11.6363108100826	13.2784722548587	13.791678630654	11.9079641057064	12.1229525116059	9.41280592080141	11.1566417755254	13.5586106261374	13.5915967188192	12.7537691056493	7.24542895157909	12.4802752836578	11.9619448742658
X12.00_661.8292n	15.7168334439369	14.9528396672487	14.9130507482279	14.4952415298592	14.2440345588994	14.3379023388778	14.5133087258394	14.7616624943251	14.0262909911873	14.3504816972131	14.9950836811982	15.334741478672	15.1179091312672	14.8447014981581	14.8540714176297	14.5512712866995	14.106663893756	15.0187231520466	13.688442109169	14.5567945539214	14.4241730020811	14.8423203640529	14.7087422436781	13.9840780502847	14.9648109667986	15.0998121529729	15.0290646117504	14.7475947994266	13.9310423341567	14.8319465826582	14.4823904815688	14.8365641057493	14.3422319829203	14.5960302694954	14.1472094948169	14.9714738416574	14.564602264852	14.4761648674421	15.8067657151772	15.2466191864611	14.7336432654783
X19.04_583.8517n	15.0364421178196	15.2628298317238	15.0771046061091	14.9349214962308	14.6203615163556	14.7840343921885	15.0268703604154	15.2485430691521	14.854181111812	14.729202576969	15.4268501372767	15.5261332965804	15.4124402764967	15.320830619101	15.1055351409387	15.0653807315905	14.7768177793733	15.2298100048682	14.6638466027485	15.124896110653	14.9602256094991	15.32721002604	15.0684000643146	14.5872229165931	15.1997185898516	15.4299188430428	14.981144788274	14.9222561795582	14.9038127426988	14.9096781239645	15.0501345272463	15.0422125973184	15.1467430283616	15.0494225858473	14.8489849261606	14.972870907067	15.0671854914979	14.7973360026431	15.271079069638	15.3857017958568	15.0720663357746
X14.93_583.8516n	18.5809398548157	18.6237619645383	18.1923347971696	17.7261171288326	17.6338770994553	17.7412501418364	17.6192370608739	18.0725894419636	17.3522015196168	17.4868188287193	18.3648376662013	18.4600896837703	18.3016937922707	18.0143890546327	18.0575956956327	17.7438433236491	17.3629802825683	18.0808426672664	17.1110741754416	17.8270602660312	17.5895700637325	18.0030476532479	17.6796681182048	17.4781313269655	18.1820943929878	18.2396909831099	18.1166240786784	17.9954523999878	17.3840116421868	18.0192073950903	17.7160172602779	17.8212152768678	17.6381824929225	17.7473854569634	17.4492935767507	18.0377407980118	17.6584757915968	17.6963973467504	19.1658173641433	18.4315315892449	17.9295653844085
X11.93_583.8516n	18.2499285222024	18.1779374968364	17.688169567871	17.2960324496915	16.9430887603234	17.1104947652678	17.3248615273663	17.6738308827812	16.7224698202768	17.1574209744357	17.9815594830159	18.2693279351803	18.0663469929413	17.7129405547918	17.6983984624321	17.3450564310559	16.8607643859197	17.8879154695496	16.317159622491	17.3695927231455	17.0820647426904	17.7289443100407	17.4133053459039	16.539350255599	17.9265444603098	18.0895800654052	17.8299568597201	17.592464502738	16.4446768185628	17.553312292749	17.3150347755015	17.6571606699916	16.9897645757336	17.3016344019087	16.8007901234009	17.6689117141386	17.4884527191946	17.1571894368284	18.850954039247	18.1387130931108	17.4652434957625
X11.76_469.8539n	17.6726271530743	17.6057813618068	17.1382293651189	16.6931364087239	16.3838841673715	16.5617362484949	16.7280296644136	17.1085142025129	16.1550470707447	16.5692367977154	17.39919860041	17.6803300714135	17.4886181075572	17.1220547363036	17.1050208517022	16.7236741017983	16.3061332571659	17.2820038821688	15.8186025618147	16.8263172370843	16.5074671916793	17.1381507831609	16.8350043490601	16.0818710827105	17.3275432288343	17.4525963012904	17.2312067559416	17.02869484388	15.938578066504	16.9858962336195	16.7177711046207	16.9679573373398	16.4824326781164	16.7616086853005	16.2637799771019	17.0445896045956	16.9011862066996	16.6188355014038	18.1632565026833	17.5164851177126	16.8855256609636
X5.62_329.9034n	13.2760393972503	14.1510790123166	14.0722435742361	14.3649779476543	14.8652560437891	15.1371161584605	15.2459570012583	14.2789329455719	13.7389221311668	14.3219188911364	15.3365152917596	15.7544945032526	15.0080057785732	16.1417768686933	16.0728360625756	15.4812358602663	14.5264960859762	15.1577624342833	13.6599530705298	14.9274729168309	14.6045025351987	15.0480100356737	14.4642478930874	14.0431965219422	14.9240840256874	14.8496019793141	13.5231349614687	14.4842443525498	13.1862684705863	14.9083470588233	14.9541442366993	14.2272131939165	13.9513707583776	12.3063978704116	13.2428358895573	15.3109061659804	15.3101328575389	14.8360197385274	13.5663321517703	15.0939801122203	14.2484988754192
X5.62_283.9522n	9.05331732897728	11.4264939509964	11.8986138067291	13.4239059762899	15.0865703352472	15.1313508518139	15.7011187544729	12.6694865162528	14.0553670289555	14.0647407287722	14.0159509951266	15.032502784264	13.3519568542775	16.82388464676	15.9827457688796	15.452137161404	15.5521615967979	14.8307657384649	13.0468798206563	14.5589318362549	13.9985700107443	14.6087272941094	13.5703787337085	14.3511848077778	14.2200020629842	13.2213541289989	11.015668508279	14.2376513854903	13.1406527996056	14.7232852433275	15.2473446002013	13.0937967223311	13.6776355505021	10.9836329019784	12.5180722099687	14.8443863950142	14.8003405360065	13.9241052885426	8.18935261047565	13.5361716051886	13.3179682086647
X5.61_402.0137n	15.0452046595066	17.1136744180342	15.3334076905935	14.2806478605951	12.0502053905989	12.2895361301926	12.3947837168211	15.3428225881912	14.4734261209975	14.9210643261457	14.9847745054495	15.4946660282474	15.5395572559112	12.6168938281689	12.6543931041475	10.5291112692597	14.3943126596574	15.1358514096444	9.30518401900241	13.385838860943	13.0763585189698	14.6604298603188	15.051752577433	12.2089691598473	16.2664052945937	16.0011086587905	16.1941059108205	15.2069478267096	14.0733587295152	11.9795811972714	11.6688127224048	14.9068904710783	12.870754412691	13.0366054519892	12.465883652418	13.7212677108831	13.8835048981489	13.4946332083849	15.6604213183248	15.8723575769779	13.8892034003572
X5.60_147.0521n	18.7515648010366	19.6515917768709	18.6793069508448	18.1459363340257	18.0168220475742	17.9691441341863	17.9637787940152	18.4825200866021	18.7991576618955	18.5706192065545	17.232128935409	18.0106413816461	18.0367904584373	17.2968250520971	17.2701793899333	17.5577690744621	18.7003182095359	18.4748183774264	17.8511732379222	18.3994808420375	18.0612297153748	18.5590924138472	18.6249333354549	18.7367592228331	19.1648109024619	18.8372951481186	19.1049575540501	19.0837742496743	19.1079529485344	18.3702628088889	18.4236569872607	18.8567871751033	18.6457533295049	19.3995209668224	18.6250304296163	17.9000814018891	18.0524148464928	17.8298878765079	18.4949766387344	17.4368962570407	17.5350885225501
X5.42_295.1170n	13.624794493933	15.3440506764452	14.433080536073	14.4412784036426	15.4323988311895	14.8696542630989	15.1276149486032	14.4723798784262	14.7766051706102	15.1366951004208	13.7556080401825	13.2274511408241	13.1400435930323	13.0721919432279	13.426067674161	13.7904363790527	14.6221794277339	13.1205659546876	14.8752549631247	14.6123321733582	14.606963123107	14.3546075109334	15.1410673866451	15.115944657311	14.4682081737936	14.2667423500833	15.7952921734998	15.0318155557255	15.072192379809	13.2089561456083	13.4864171833529	15.2909339792097	12.9095435770091	12.2504545246449	13.0279933498487	14.3444386290041	14.8910957536118	14.4118398523967	11.1585333623624	13.3668697619078	13.0222377651549
X5.38_290.0754n	15.2522853419314	15.4440639578732	14.6218296593504	15.5143166099987	17.378456184163	16.8189380962869	17.0748370146982	15.3550355286088	15.8989779019039	14.9651267955204	15.9193653645137	14.0216210811286	14.0172255971496	15.5533910832616	15.3207591481418	15.7668085517818	16.0249622323285	14.046988597555	15.5074475096406	14.8814096721633	14.9503592194528	14.9532153862031	15.0096802753072	16.3905381934265	15.3836147745363	15.0219901126934	15.2704151213864	15.4282074199706	15.8038501384798	15.3159646988021	15.5876510718588	16.5570171324535	14.7713278950553	13.2133518671548	14.7123777366382	16.1600452694518	16.4029074310022	16.3250738331828	13.4814941547137	15.4852129378227	14.8686128107148
X5.33_304.0910n	18.9876266769257	18.7244165052094	18.7392005915185	18.6165544312437	21.487096439521	21.2485916265524	21.046326655265	17.737745359155	18.5595887269358	17.9067650002179	21.227850542181	21.0975445064727	20.873580720307	20.3992188244941	20.2049960372541	20.4597061228958	17.903508436306	17.9553127762728	18.4089942638258	17.9064084809907	17.7742581435126	17.9203200064837	18.1397734423448	18.9065421566103	18.7465759828462	19.6950812149192	18.7909883518176	18.517647917588	18.7955882793058	21.1972009375102	21.2735099420112	21.4922006445965	21.942099805216	22.315158593041	21.6944995960206	19.2168395951308	19.2064191259269	19.259140967136	19.1262147964246	18.8619905164064	20.6255246411564
X5.32_381.0367n	13.4155310234996	12.4607280959212	13.0158066960877	13.9691441536385	15.4937258071821	14.2156417271574	14.1962559851951	14.3018344230677	15.979230043624	14.0402858492461	12.8409928310698	10.8091074778316	10.2967793836266	11.0604238636904	9.22196302476464	11.5841481154022	15.8967525187264	12.2610644986625	15.6117021711173	14.1626575869474	14.5793660971385	14.1328919057861	14.2512808873417	15.4802559342116	14.8141546055965	12.6036516032708	13.6256975950489	15.0647286936639	15.4957711786416	14.6867990517964	15.1206764812046	14.4836528563448	16.1816174107465	15.5382221790938	15.9900727795701	14.1272734102467	14.1961096065211	14.3587828366581	8.78303419388973	11.2435713528583	11.3747408516158
X5.33_305.0863n	16.3301550931758	16.2236993952947	16.5588524888271	15.5674007244489	14.9825474423075	15.820824601493	15.5923491083715	15.7581298643115	15.8253445287102	16.0840659883356	14.987098815088	15.5286152516202	15.2205639373276	16.4957577186163	16.4884031518222	16.5489998562313	15.804031717081	16.7091442322608	15.453329132511	15.2457758233748	15.2437008745473	15.4379783515851	15.386819918694	15.1152937931856	16.0730789485588	15.4943261143918	15.8077228228071	15.5072489887268	15.6015969561943	16.6949392077746	16.7815910348082	15.2355252603444	15.832055230451	17.0656864473164	15.6969554376719	15.5071874668176	15.4582248873598	15.6818576948397	20.5689217934669	19.1306480639066	19.812063348582
X5.32_321.0700n	22.1534341332777	22.6947214540175	21.5752337099773	21.8415963783795	22.6554711147739	21.8423152716467	22.166534256222	22.3934219264516	22.7729615740578	22.1035584217684	21.5063880654645	20.1326135512238	19.9089308627376	20.5204805389717	20.0718209500946	20.4580072194082	22.8452706479281	21.2624495701398	22.3026948350855	21.9502734740127	21.8989315461483	22.1848326661627	22.3903502462492	22.4822650494321	23.0751729723815	22.3641828603356	22.4842959191797	22.816250214737	22.4107291678851	22.0893049532942	22.2578193738451	22.8732326816995	22.848611399276	22.5105319490997	22.6532932477962	22.1916124290975	22.413122716424	22.2107357604637	19.9949054957767	20.8541470194882	19.6994094214614
X4.96_180.0624n	14.8284436122294	14.9660384021718	15.0677805346188	15.2619528474086	15.793625963773	15.1894724492145	14.9340241924405	15.3314055775588	16.3908981878645	15.515875299741	14.1569894667815	13.8451126250871	13.5493091764891	14.2448081329198	13.8281191108108	14.457107983136	16.1282906457879	14.6507874622866	16.1774152942837	15.1869050581486	14.9864444383538	14.7376740700843	15.0500477214289	16.8705850638666	15.5003017088479	15.1525244715152	15.4397620907862	15.8576903605986	16.4074447501877	14.4062350373938	14.8263218768057	14.8277676530676	16.3055383948152	16.7594611088841	16.5308986778753	14.4909059497262	14.903503127553	14.7436780902751	14.843037454893	14.6177047380664	15.7820577314167
X4.86_335.9821n	8.35762043365203	8.71317368452554	9.00919251120735	10.3798275002659	10.3290601747133	10.0962157179727	9.11030916409838	9.39346209390462	12.7917537289529	9.86143223862466	6.88188338592196	6.77206477503878	6.75714359062058	6.94845811134231	6.70403453378961	7.96122433072419	11.6211306041152	6.73998225633642	11.2572796894684	10.4212321832939	10.5243328150039	9.04006610133814	9.1993361052156	12.217017840939	9.8421247107545	7.87124158326763	9.46889045437665	11.1190115035433	11.5838148875788	7.9060876385766	9.55149428155003	8.17325885044267	10.6229329782378	10.0155823093353	10.1854798420478	8.12268111209155	8.23602014015102	7.9499262573831	6.83974797459438	6.76162196365883	8.35440158594853
X4.81_359.0638n	10.8727730182851	11.2109827330213	11.1674243956313	12.1894347759448	14.6458873389573	13.2800722307693	13.1747650453572	11.7627784283408	12.3228965810347	11.782477733234	12.5814472987995	10.8278321028331	10.527831813296	12.2377307349018	11.3322235804507	12.3429437718997	12.7641129899898	10.2978561162051	12.9327258978458	12.2302913175739	12.8632499743249	11.8764193842386	12.7207050760953	13.0659703159742	11.7250090681077	11.1729499731865	11.9760619530552	12.2762744504021	12.7911260396905	11.9185047517157	11.9458024527464	12.8500360145577	11.5115262586708	10.0438549854455	11.2232363604156	12.7039970529828	13.0711357362254	12.8296488653953	8.25072081329343	12.3119588576184	11.9321481897904
X4.73_396.0204n	15.3363642531139	15.6276176958976	15.2550158531598	16.0743357348322	14.0781334803812	15.4154773886691	15.0455367143612	15.8986397750616	17.3853448760567	15.7160526925338	13.9278128988699	12.7499904569087	12.2792543871601	13.7933627376139	13.4419842736228	14.3502741787258	16.82044536403	14.0353616278141	16.1263088577421	15.6750105616699	15.7781100297576	15.532521233619	15.6051454043108	16.4460689826354	16.3147996516721	14.4885472467925	15.4521230401477	16.6456325321681	16.2999867267011	15.0840928228409	15.1050464715656	14.920047205814	15.3091581254172	15.3804122285844	15.1167287562956	13.824518858861	13.8724319794735	13.8705741056535	8.50197361743632	12.8564116421791	14.3924062550406
X4.17_220.8521n	13.6088137464891	10.9588312002239	13.8482937209177	14.2755011378933	13.411379109546	13.6188184038821	10.9628646919533	13.3546932647201	13.4340454038062	11.8796184290052	14.0484981304735	12.2389604659975	11.939446813781	12.8942037642787	12.0298653712692	12.2236752449548	12.9866114862165	12.5972454187645	14.248274927885	13.3130791737854	14.5263534334152	12.0720029762935	11.8271554976718	13.4795520269892	10.5147940910834	10.0913990350531	12.6740832573645	11.5848758396138	14.2788750700359	14.2945838480973	13.7836068797902	10.35146129129	13.6648380848987	13.1856636354878	13.3893053045906	13.4695088589891	11.5078555637082	12.3562214536999	12.7502256042905	11.6327589116683	13.2026287968071
X4.17_185.8829n	13.0215461448812	10.4379997379379	13.3102600168592	13.7845013020624	12.7745708517808	12.9668196656407	10.430766139949	12.8457686917971	12.8937867594266	11.3577130514423	13.551816958763	11.6990204133508	11.3474032768919	12.2806637121344	11.6313254516655	11.7946200473601	12.5686657591313	12.1446605466214	13.7484430795533	12.7159612761608	14.0284189807484	11.7314738120978	11.2710119401998	12.8710546806968	10.2034095955604	9.22965740754527	12.0480321548066	11.0124906087279	13.9012424865535	13.6760629887175	13.2792222939731	9.58726181298932	13.1636805598108	12.7279069625141	12.9109559173332	12.8728074425053	10.9128521272847	12.0716903393897	12.3593726101716	11.3857825645121	12.7452188111294
X4.13_289.9936n	11.6205326746196	12.1132300117641	11.8231064724607	12.2953337171598	11.9911337520497	11.9838006645997	12.0387947642308	12.1942487288363	12.7126956268022	10.8776313194066	12.8010221763661	12.105241434275	12.2195428601857	12.8261396842347	12.3939162998065	12.2115098414507	12.6781346547158	11.5081474977041	12.4865045755122	12.066606921212	11.9018555194146	11.9388114704838	12.4366448424023	12.8110606809581	11.8854775647577	12.0685786566955	12.3377812484808	12.1730556229063	11.2004468990465	12.109764902458	12.1811270093156	11.7258877531235	12.2267041185344	11.715624673351	12.455199007942	12.3757656672509	12.1209112365489	12.3234286857396	10.6110344934387	12.6251666167589	12.293842533465
X3.96_155.0233n	8.11857770682055	9.19678330305866	8.69678161281161	9.80358256318193	10.4549237954759	9.89746739117501	10.082973974116	8.47226594608508	8.61863014926977	9.69561632911033	9.79312956444153	7.61725528654928	9.44003511515361	9.66292108900175	10.0318716636794	10.2850392401663	9.16361871945919	10.0008169688354	9.22032487806902	10.2689219212468	10.2392672422811	9.89135999387791	8.16888347449507	10.0198790328564	9.87787505162071	8.17864711909584	8.55166157010083	10.025422934825	9.73089316109235	9.35966215573872	10.0969450144364	10.3880329419008	8.96986681286694	9.39384254844633	9.99596782482259	9.57614203488811	10.0573075644954	9.10011619721346	7.16593806898471	9.83135024595366	10.1946763501028
X3.95_1457.8953n	9.7700669081126	14.4508322035364	13.2236154451141	15.3424125577373	16.051680449153	16.3128956595046	16.9085626203578	14.5665981664785	13.521129651378	16.3268180566444	16.0458620218041	16.6772703641357	16.2849453738632	17.0116857728742	17.5041726572438	16.6625845347383	15.2414626233816	15.5628662410127	13.7425617617378	16.2495888792176	15.9005832308086	15.6852148036937	16.1147056330687	14.9506078534271	16.2890914415361	14.9373079691037	12.7484275655796	16.2879066339438	13.1135351890282	15.8601662574414	15.1008817148441	17.179945230079	14.7711771038208	14.6262447540971	15.1226955551355	16.2209907620163	17.0066210559533	16.7871386220199	6.91052201403651	16.167712930394	15.976737757507
X3.95_1458.8951n	14.5357105400597	16.6936597292637	15.9438440812467	16.9715198093283	17.8365561850124	18.0714948981051	18.6191239723325	16.1961335443479	15.4606205966333	17.865681941361	17.674894621819	18.4096559596293	18.191574005767	18.799790538411	19.0013648165713	18.4255311803492	16.9297942366753	17.4699561990679	16.1815901799672	18.0226351778298	17.7275900297246	17.6821263610763	17.7643331413362	16.8282029686444	17.9328756916776	16.7472432176264	14.7934132065669	17.93244311329	15.8829112159201	17.391560394873	17.1480388102867	18.7926131000676	16.505741654184	16.3278507490489	16.5809161684545	18.1328912656697	18.7386905416385	18.1559452884683	11.2996319693557	17.7698310223729	17.3217531878043
X3.95_1314.3554n	14.3854236456649	16.6733574734349	16.0384477060979	17.2443150008316	18.0381502801887	18.3491717111756	18.7577491413108	16.2822891732833	15.9615075713771	18.0129998340799	17.8335791795903	18.4063102932415	18.1201294713012	18.9554682724827	19.2366146952562	18.4960148191306	17.1606572347065	17.7113631889627	16.3424739488831	18.3063150839848	17.8087394197352	17.6947936070897	17.9551627494201	17.0637688887591	18.0825507392208	16.849580601866	15.2818048454673	18.2289385641735	15.6505564613129	17.5096951148459	17.4538915091453	18.958339916674	16.8704851650107	16.7858526065046	16.9881929957703	18.3770340203097	18.9510667199462	18.4848115363934	12.1290598371617	17.8681499053659	17.712010269104
X3.95_1458.3939n	16.9691558882258	18.463367930682	17.8210593671106	18.8273098003158	19.2195627279636	19.5914029778076	19.9858032293652	18.0724347490357	17.875021910731	19.3328191334999	19.2002223644957	19.8386793268474	19.544692843786	20.0889435140245	20.3995390990441	19.8909777404581	18.7767950179757	19.0462119860395	18.0212605812209	19.4908467193996	19.1168345676082	19.1514578744744	19.2562626265871	18.6638874103332	19.4902652275387	18.487974968163	17.3132477378011	19.5678313086762	17.8056350384035	19.240049323467	18.9732760564842	20.1517625829225	18.5666682809355	18.3494732055877	18.6905981044585	19.6672852574986	20.0661753308792	19.8114501592499	15.5278995505611	19.4652452924332	19.1350398723129
X3.94_1312.3635n	6.77500510787488	10.4198790480644	6.80957327689752	12.9852751533245	15.3936763740486	15.6660806379138	15.7556663464546	6.61373263350972	13.3121291044013	14.8312033408148	10.490729117015	6.77653839548143	12.5309435374852	13.8386496512991	14.0657582649329	13.9609754072446	15.3875965130993	12.1867187140167	13.990187311506	14.895516071804	14.7329583422348	13.393122163638	14.361984892224	15.9210462978862	14.2563363612037	6.87033519568487	11.0616907037084	15.0252777041865	13.9472332687606	15.3950749382396	15.4498401384619	14.7015593053542	15.3602925501063	15.4271363984179	14.9141346829912	15.3013192591168	16.2390406034549	15.4556298326847	7.07591699616815	13.1932569717349	15.0536819469784
X3.95_1314.8564n	13.8132125396673	15.9459759903228	15.4053301787972	16.7132172188515	17.4181590315264	17.7141017992906	18.1698506624012	15.7387020662653	15.2401592901945	17.4914362697572	17.3866247371425	17.841876843494	17.7502217916604	18.3580145094024	18.678172065129	18.1008981863963	16.7056199816693	16.988852390947	15.700367764894	17.6275147990429	17.2773279565604	17.1562735654251	17.3781294811921	16.4313543327613	17.6382138975036	16.4607865149533	14.8376223434723	17.6075586067042	15.1728757284411	16.9664185659019	16.7908195793814	18.3771060455776	16.1879409749214	16.0646693498465	16.3093844719952	17.7693486468959	18.2835408271114	17.9428758277986	11.6287327054588	17.3407624589636	17.0113170975669
X3.93_1455.9013n	6.876542637541	10.382797769745	12.3032620677895	14.6562565272304	15.9595611387104	16.5455697932325	16.1208967752255	10.0703688076262	15.3498721204424	15.7527381587092	12.9359828188226	14.0208225328169	12.2665915858358	14.6758333986228	14.6651435932606	14.6240969208532	16.3415218093866	11.8385474549531	15.1480539183278	15.5421520047927	15.6947379763349	14.27345444375	15.2455867305815	16.4531934328851	14.6048284776501	11.1825189687385	6.72371039852815	16.0282381095245	14.0598953462296	15.6106596035353	16.5666225498699	15.2677155730174	16.3972096460684	16.5927123502204	16.4411286102659	16.3991979513915	16.8536166129395	16.0076014334156	7.10867690863399	14.182026174179	16.4086063522669
X3.37_228.0031n	17.796306738252	19.5272565478161	20.6007366835022	19.6489141930395	19.7262837803814	20.8871579053803	20.625002235481	15.2501524204563	20.6557226540409	17.2815081595044	17.7108323748315	15.3877966918073	15.3918726901924	21.0074977261428	20.8015725695547	20.7616018312966	16.581826291666	17.084321796112	18.9165739133844	19.7106793013012	18.0674247079026	18.2893393537721	19.2701776929868	18.858553251665	16.6193023143566	13.723802689467	19.9219364870145	16.9372364816797	21.1552205492379	19.6558243508932	20.0790657455648	20.272167976175	19.8256318280956	19.1561468304185	19.8094891590372	16.6997409901997	16.4832180155668	16.8309338354881	15.9252518821252	20.128323358132	21.2620212839981
X3.36_130.0253n	11.2306683103111	12.6348506911405	13.841240384921	13.1435418050301	13.2275039375947	14.4015977125875	14.1220955575376	9.30906369602158	14.3513960546094	11.1233247800511	10.9475335514675	8.92900366718921	8.62302083069604	14.4844268778769	14.1793813256373	14.2746142614645	10.78039656713	10.5316865303341	12.6893834190422	13.207396624681	11.8621216958975	11.7807531900644	12.7022660960382	12.4578260359005	10.4396159066773	9.11013344856303	13.15759667181	10.5228377711369	14.8826880616276	13.1435758964254	13.6023589486558	13.5618915899987	13.5599245799468	12.7422909361728	13.5707447882404	10.1331918631133	10.3806031367525	10.4345948762295	8.55505110589486	13.1968812329539	14.8916861154844
X3.21_297.0543n	10.7363729250675	11.9495630080373	11.8384513630515	13.9011367421351	15.56478368954	15.0822297603756	14.6948125243626	12.3062793320241	14.6315362431513	14.7630008886674	11.262562687855	11.7988778951489	10.778580852349	13.1167879018238	13.1583585167553	13.7499228421438	15.404551525589	12.8056760839646	14.9926429718897	14.8734048560097	15.1776183781895	14.3610724629067	14.4841513832314	15.7504193668323	13.9107541025973	11.1159390638128	13.567198635935	15.2410602512496	14.6896344089112	15.2290323620165	15.1627752854475	14.0897485130052	15.1879679844454	16.3588469916156	14.8927785659292	15.176332266163	15.3505277897314	14.9398762999271	8.53292282100642	12.150711054922	15.2557052097695
X3.20_295.0572n	13.1806487732997	14.514100216575	14.1144147337226	15.7331075889076	17.366413808451	16.7564154352121	16.5791641415189	14.2665597257045	16.4486898096883	16.6773534216585	13.450166605598	14.0775805845303	13.3276980589079	15.1217165812161	15.2045647380777	15.5249013350841	17.1396062919095	14.8623328677631	16.6723932625587	16.702481322553	16.9872644393511	16.2493091441311	16.4046954618971	17.535483153394	15.954913203756	13.7748087185534	15.8783353617679	17.1008627847457	16.4213688230304	17.0193746293736	16.9573570610177	16.0062522408862	17.0301121038143	18.1584959071467	16.6461739958936	16.9891305431125	17.17896500359	16.6775069430862	10.4841885185104	14.2821222126841	17.0213726107982
X2.93_301.0469n	14.9224395866777	16.8557217885646	14.7471989467717	16.3572340514297	18.7972282326973	17.9316596826004	18.3575704029167	15.7606110911319	17.6455101762291	16.414377648925	15.497992510005	13.8088508813203	13.613212361552	15.2820881410291	15.3205874861566	16.0443565949389	17.4487828918036	13.7697264603558	17.2365621123498	16.6971268216483	16.2628213269323	16.478073480094	18.0383225262625	18.4489159732109	16.7531145436059	15.8258642366167	16.7197691816775	17.5197492193503	16.4482762883826	15.4607425122468	15.2284229070521	17.3814777871392	15.1487468502298	13.3068355782666	14.9663473968493	16.177040302126	16.7760570524464	16.3283577646911	10.6538703971794	13.6217226094677	12.2884681495468
X2.92_268.0731n	13.462217073595	15.400710599631	13.4910761729807	13.8682347259312	15.2921992984218	14.1649053537655	14.958791270921	13.9325655576363	14.6111155694366	15.380599985606	12.8216698141779	13.2781194620006	13.4053953670366	13.7624668987872	13.7197043882549	14.0981244341108	15.1365168138768	14.192500117892	14.2432530436675	13.5527811085501	13.2978129471768	14.0836507464102	15.3172296870005	14.8030705207488	15.4808908154255	15.4914729753594	15.062392871022	15.3351590310104	13.804220071586	13.2923917378379	13.0335041404698	15.2506276217572	12.9351637918105	13.3293099410737	13.3598889549254	14.2726979170288	14.8459186595023	14.4376605047937	14.0963102276572	13.9122340084255	13.7902379076531
X2.91_296.1626n	11.2834842994633	6.96715585006153	11.3149048936009	10.6881226665335	11.4545927345924	11.2920602227289	11.3585354998909	10.7104147124429	10.8351478909869	11.4365897219971	10.4240607789571	11.6551695776412	11.7084809596309	10.8812147215273	11.2798083350619	10.724530285377	11.0723758581807	11.1997445548677	6.52311920093138	10.9015644551994	8.92853273111872	11.3354757828024	11.6381253065048	10.8338654134681	12.2084886007365	12.1227162511636	11.2958392345065	11.64036112138	6.50936569933822	11.145518559524	7.52230724368933	11.820303938572	6.42051941513766	11.2258200746303	7.32799095287945	11.1441394218077	11.7629691856799	11.9113427376158	12.2008760053917	11.7673819273466	10.3281642654666
X1.41_957.5707n	15.8873944137568	16.9186151958513	16.9590850489822	17.1933262075519	16.3349107287866	15.6510075877807	14.4967440066215	15.5357436226703	16.5060496373485	16.4967028049278	14.5815701982002	14.4789752810816	14.340475447678	15.5089356217816	15.5158002371092	15.5499214965906	16.680000141914	16.4451699513545	17.7452831842679	16.7568372249523	17.342736512556	15.9882214020807	16.8547829603947	16.7418674387973	15.9537390927131	15.5219086924881	16.5458232991629	16.7663729140417	16.9074534104517	17.0372900046114	16.2519164955652	15.338968412741	16.8166396676831	16.3748165883272	16.1623413005357	17.7406583740974	17.2040973414776	16.9056718816588	8.4226834458916	13.6214754005101	14.5885444707434
X1.41_985.6014n	16.043198973461	17.1383332231076	16.9293047270513	17.0377340752697	16.2875622585786	15.595171642817	14.7204732336244	15.9937262254931	16.6208179771179	16.8346659337032	14.9418879965944	15.2471909784937	14.781939115684	16.1555786895424	15.9526838744703	16.0718684658729	16.9728509802337	16.5913199831762	17.3585580448504	17.1476110250142	17.6908919082479	16.9184267800289	17.4054895029307	16.7697142522136	16.7419093278089	15.5597931721146	16.6565903073182	17.2005666206127	16.8728299399836	16.6795348663365	15.9994342352434	15.2563315340893	16.1933631159068	15.9743703363945	15.6575677778495	17.0504128348062	16.472684083208	16.0461013334026	11.9034598023197	14.8373007092788	14.894887851909
X1.41_823.5485n	13.7943750941864	14.7905594838158	14.3662764602723	15.3372711092407	15.7717725062468	14.5237744431642	14.0724683146466	12.6493327246079	14.7348067333738	13.8742360530016	11.7974468953157	11.4931509038466	10.5610072202784	13.0426504510571	12.9973431846902	13.4729101525794	13.8726840131019	13.7281519815893	15.6062571769975	12.7799946643166	13.6543200247478	12.5030181434558	13.6786340516708	15.6560830618145	13.6571473800961	14.0070530185999	14.8652575238934	14.4608528998284	15.431036707936	13.7467230879662	12.8047261505213	13.6745214125513	13.0816276176059	12.5313466777838	12.4389099674578	13.3435277515292	12.5614403214364	12.2248919069596	6.97431358620318	8.26615982735826	6.43158026176553
X1.96_953.7049n	13.2969600620376	13.5165239615876	13.0221671978788	12.6969356473423	12.6444964633523	13.2986207458942	12.8779462398609	13.2385672098877	12.1707982301865	12.6981725935373	13.2838638433689	13.0341357759553	13.289406681006	12.7005360998761	13.0702278682152	12.5855666132608	12.2863686572462	13.1551470294949	12.1812495569845	13.3016855345043	12.572879868843	12.8902878280141	12.865594568177	13.0710434144868	13.24369496642	13.5285826384473	13.8659174302517	13.3797382363704	12.7655867210683	12.9933159698103	12.7152443358358	12.3929158911124	12.8850344558804	12.4401104406662	12.4115278418957	13.3747820184455	13.4344732032959	12.9812093660619	14.1537449573184	13.1981883754664	12.7862157017859
X2.11_326.1557n	10.958701592671	11.2152247595298	11.4334153117251	10.8341363883128	10.2944519590023	10.8254005844741	10.4109711540953	10.9338852129111	10.6533128101255	11.2771353517368	10.485764562575	11.0583802113902	11.3087228932562	11.3675140253313	10.5414968541473	10.8310507671119	10.9961641676876	10.7204421279084	10.2724881458491	10.793798769974	10.4712020270414	11.0579837875243	10.142049614687	10.7672591036943	10.7470829398913	11.4974457881519	11.0833809023969	10.9757479691847	10.2162755544968	10.7178994228054	10.2955102791759	10.7986655083882	10.5252305767612	10.9829235398712	10.036035043312	11.6261902035913	10.3847082782948	10.3597597584259	11.884348014329	10.5909919019506	10.1157613457931
X2.12_172.0198n	11.4209790803018	11.2624015996127	11.2193577620802	10.8542627068958	10.4509349150191	10.6932078410863	11.0949932681856	10.9876906512667	10.8002523852925	10.8919275828859	11.1329665425814	11.2444751868293	10.8523159140174	11.0333827143148	10.587893138365	10.7549219712665	10.7725100946472	10.9506682021806	10.3567884127021	10.5351820614012	10.8514344493634	10.776882815233	10.3653351003955	10.758274631496	10.9484789585904	11.0650163596153	10.8162744704093	10.9596212546384	10.9927652530247	10.7786853014643	10.9098594023999	10.8161352187975	12.0417017786552	10.8612852552984	10.297149826201	11.0415162539191	11.0655702040929	10.5168191613562	11.8154784268985	10.7409650068775	10.3870630910327
X2.10_314.1555n	13.6155356891854	14.4790538741772	14.3162152141989	13.1903497502024	13.1995081986647	13.4320559039926	13.5122692821973	13.6091178282614	13.5815223100303	13.6575745427228	13.6288964360217	14.3849193098504	13.5858535617655	13.5750975502682	13.0459087445749	13.1213063974748	13.3801436163831	13.6293071189358	13.0961135688057	13.5222800818602	13.2254814167392	13.8355226946011	12.7997736657167	13.6883592822905	13.4094785836623	13.4905943564983	14.0106360753734	13.6231407742295	13.0379707513627	13.6422090503063	13.0610770567021	13.2578936318303	13.5554653835114	14.4936654158417	12.9597075995215	13.788035206691	13.4977581822342	13.3917426721721	14.7047288593818	13.5973418387457	12.5187368962801
X1.41_851.5802n	13.0494646343035	13.7641913752744	13.5467311127293	14.5595376011953	15.0254369195172	13.5417231824788	13.2853549237234	11.1492433841083	14.0318581992135	13.384893575363	10.0285052739642	8.42965348804048	9.94597332617948	12.6925604040198	12.3089281252716	13.0901433488503	13.3379611773514	12.9155784621902	14.7148401315019	10.6564541519736	12.3552344147893	10.6539938606229	12.7362800188167	15.2261682309035	12.9719484198719	13.6858427611382	13.935430065052	13.9091222635343	14.5403658573307	12.4831014135803	11.9092904613007	13.2205560962718	10.7810925758052	10.5370980845041	10.4177440537053	12.2522799515579	11.9082105356525	11.4686454924887	7.21964549181153	8.46107408444544	6.45700253777782
X6.21_375.8545n	20.8449131392299	20.1653932034431	20.2697999295394	19.5511230621717	18.060990890909	19.3284042855169	18.9117079579333	20.0795013628846	18.0521329439705	19.1186957425082	20.830341251489	21.0370770951422	20.9928149876935	20.6211085798975	20.6095509587659	20.1947713357689	17.9624105970625	20.3258227112683	18.4548948580001	19.7965182953947	19.5765287220226	20.0640172811458	19.4006764821762	18.0759413097438	19.6583991523006	20.2881374101065	19.6694880232089	19.200799478613	18.0190618585105	19.9825207799701	19.6771351871865	19.4260969909093	19.0787897890258	19.2710541792657	19.0331526122778	19.9944033702889	19.4947480591192	19.6028685718229	21.9186359835577	20.8706448936847	19.9369862001876
X6.21_411.8760n	18.9682315234315	18.1517343823422	18.4215231338286	17.7654880206349	16.1510046935721	17.4363430927385	17.0267985100674	18.238412309275	16.1780072233233	17.271053956057	19.0519258662438	19.2579865479368	19.2375349341417	18.8061606102495	18.852580346977	18.4335242386414	16.0874989776244	18.5335182621681	16.6875302920313	18.0004949388751	17.8059307375088	18.2665414887351	17.5794721426257	16.1339547149523	17.6952717302361	18.4225768435686	17.6578758349433	17.2552388085502	16.1429189310855	18.1377868717964	17.8794251650702	17.5378809905807	17.2582806417333	17.4807179564622	17.247930452996	18.0623395964963	17.5557831461779	17.7996140893	20.0263505938061	19.0942700783506	18.1894085685
X6.30_146.0681n	17.2483250841342	17.3241211320927	16.9116988410843	16.72795593873	17.3897991419285	17.2303483967475	17.2441282286971	16.9791384978304	17.6667964820598	17.0147616709045	16.2926795346213	16.6644320478745	16.4434201540288	16.1146001413821	15.5048692436172	15.9703122233221	17.4718312055696	16.6116342373135	16.9473594400039	16.5853549353968	16.444398659635	16.3787555828685	16.9392015457408	17.4618393156026	17.2348415970211	16.3612124525912	17.7042662848664	17.1621690572148	18.2811462444917	17.3341726425358	17.3252868679832	17.8183848637046	18.118494789357	18.0434284786452	17.8956903100664	17.3616125681617	17.3880803125731	17.1389818735699	17.0553738047994	16.4851230073941	17.1101510397801
X6.21_453.8318n	19.3704880809711	18.2471430944761	18.7335885622277	18.0245274033458	16.221024061005	17.6819103068936	17.1683214558184	18.5343021408408	16.2820436831223	17.4760089524891	19.4559175787673	19.6459521177635	19.6299428244687	19.2316235386386	19.2518211764613	18.8116156774299	16.1386574469817	18.8928969892255	16.8774685786928	18.2860575678632	18.1180630464391	18.5865927989801	17.7923664741561	16.3018382275547	17.8754386200318	18.6153877308843	17.8833763985068	17.4430214198135	16.2497407018485	18.5376929447218	18.1885321548894	17.6777055926894	17.5326608165657	17.7348954928602	17.5212591042647	18.4365320583806	17.7617130753219	18.0758050078526	20.4072812714706	19.458170451491	18.5194215639576
X6.82_256.9277n	14.5672796028563	14.140250776933	14.1510412954536	13.737283824718	12.763203489491	13.7216468148762	13.3457279329894	14.0888374063539	12.662326737261	13.3641467975312	14.5338850985138	14.7367224648271	14.6606826938031	14.4982388776613	14.4381436763847	14.2858801942202	12.6692877115448	14.2704365274285	12.9194434728147	13.9150553920801	13.6622944371438	14.1202780374259	13.4625889858681	12.7913269570736	13.8032301370559	14.0597979387316	13.9342355273106	13.5733341165199	12.6846229880758	13.9525329249063	13.7703327502694	13.5507604156956	13.3719775956091	13.3919514736353	13.3238927835917	14.0924623293048	13.7554103545221	13.7318903567375	15.3068693352408	14.6035967281177	13.9662235636415
X6.80_331.9096n	21.6244710820899	21.9077854615536	21.1497306845785	20.4347458191588	19.6787218085388	20.4118378637187	20.4383953031734	21.0272131481961	19.4216792281825	20.4386341098439	21.4944388585511	21.9635708112423	21.8548932578804	21.4329178131633	21.4293833316356	21.0680646684411	19.5278863004732	21.2403751144121	19.3387072406175	20.6369495364646	20.305568927454	21.0410072908765	20.6878798351895	19.4446710944212	21.1844825897972	21.6405462182098	21.1344339437193	20.6295445885892	19.3610939425686	20.5279677475804	20.3512217628481	20.9675559375023	19.8289980178855	20.2080876812264	19.7891010053726	20.839177112749	20.7871868774977	20.5514538965355	22.772705893979	21.7141617902096	20.597548401452
X7.09_345.9250n	11.3713786785169	12.9644428359701	13.0045014109569	13.4813351356328	14.0243769748056	14.56208550549	14.7079126098632	13.21106632406	13.5327918039341	13.5424074481899	13.9225526877557	14.5933518328996	13.1503227095021	15.2082806974576	14.6908265526605	14.3534413185979	14.359244413166	14.3664607123762	12.7308259945316	14.1567779391593	13.7660228214123	14.2940274983254	13.5189446923914	13.8467132129432	14.2694212026147	13.463740699801	12.7154989990864	14.2484872847778	13.1735493359024	14.4575657923171	14.5019808472605	13.4830137206005	13.7949836184854	12.5654327697315	12.9261218232527	14.4562729117819	14.2140831012546	13.4040551662542	8.65504374477328	13.409502781603	13.2814304016291
X6.80_253.9315n	23.1130616965398	23.5151497340003	22.6187475589715	21.8329261692711	21.2375912069344	21.8796709064444	21.8607532869995	22.460106873167	20.8954356527895	21.8642382871975	22.8930395004892	23.3492215432796	23.2252729124789	22.8130419485339	22.7838975429612	22.4045815322276	21.0376389020848	22.6196126412697	20.7058424198626	22.0708206698036	21.6779152101643	22.423600807897	22.1008608531778	20.9695232291291	22.6920138670894	23.0821370059733	22.6962824313508	22.1819844865738	20.8036558199242	21.9718798818298	21.7575288923	22.4416477013659	21.1865214109854	21.5899077631691	21.1379145052687	22.3182063930405	22.2781413813691	21.91906747815	24.3117151716727	23.1049079653105	21.9552928858055
X6.77_175.9533n	22.0209567159921	22.4650205836549	21.5833289622799	20.8840595261703	20.4950377981298	20.9614020755392	20.9383735410787	21.4426893349274	20.1618715715716	20.8973928729482	21.7970576341457	22.1878774724869	22.0558836225492	21.6860842360365	21.6521351833444	21.3092862105309	20.281942148191	21.5405750045031	19.9255617588602	21.0872520613228	20.7297219740221	21.3757956983209	21.1018594912496	20.2271859978443	21.6790614593237	21.9766829628233	21.7082848863413	21.2380459341969	20.0964673566998	20.9903199994017	20.8169492115205	21.446219689816	20.3659961491915	20.6592769253159	20.2784516383207	21.3144621755983	21.313008006	20.9293501692533	23.1057793368601	21.970922333546	20.9351253522449
X7.40_989.9618n	10.6952089937543	11.315009319175	11.3393219164872	11.8015543971804	11.4082772090105	11.3557568661538	10.611848692064	10.9151735309339	11.9264931120497	12.2753705702581	10.2945548084188	6.88709174334221	7.93449902592611	6.66565811111361	6.78968010482534	8.90293297526042	12.8980119320041	9.94303803672851	13.2615075747788	12.4535532448684	12.4164051851382	11.4807932287674	12.0933534166374	12.9532191666751	12.7252721091881	10.9264440787605	11.2716349259473	12.8253210243985	12.4842323716206	6.45927743316805	8.03038070580291	6.78197627584847	7.57592843619644	7.48393508152259	6.54470271871675	9.60848320159009	7.67875156012267	6.59835538819744	10.3881322930958	12.155334205801	12.3577173323707
X7.52_357.9058n	19.0890201729808	17.9999357236263	18.1926207573225	17.3330431512343	16.6489901889587	17.4459961522534	17.0357622516182	18.0960101277846	16.2595938907224	17.0132293743543	18.7152100781565	18.8007638714528	18.6234705817181	18.8963324729762	18.6551538272017	18.332386596164	16.4359478188632	18.2115710250248	15.9866082825656	17.6297964122468	17.3638986371473	17.8360637367527	17.1023812635641	16.1932850837559	17.7276397504088	17.5602398451858	18.1364164002431	17.5667049161668	16.3048613257763	17.9292328878149	17.4453563110509	17.304887844208	16.7410847822907	17.1532816691904	16.6235064843999	18.2327916172843	17.6456167388188	17.4656822514411	19.6438884141237	18.3023682692614	17.4065832956009
X7.52_513.8603n	16.7481782898076	15.4484648939245	15.7764807787949	14.9680650122075	13.9725984006445	14.9043186572801	14.5460070865107	15.7236983304722	13.5957621709663	14.5681415979826	16.4445150426521	16.5672455064491	16.4498823058743	16.6706037530702	16.464921304399	16.153461752249	13.7425466294182	15.9459154916585	13.4539688210055	15.2442426192415	14.9850666403801	15.5297415728762	14.7150693098091	13.528364262087	15.2507817149197	15.2173203472157	15.7128395504254	15.0503606740571	13.567161346266	15.4575032992916	14.9456444070252	14.7809486691628	14.1685208954303	14.5817216903108	14.1397438242408	15.8890374210253	15.1815715244383	15.0945143081801	17.3920842804903	16.0090622937556	15.0687320364983
X7.99_469.8535n	17.9644966665315	17.8560328017952	17.4266258647024	16.8631672361943	15.9542319857269	16.7590972152305	16.6741928572364	17.4025878327209	15.8753026162856	16.7095875195286	17.8990271206365	18.1389884751396	18.1417175592976	17.7198629870742	17.7118764234541	17.3905580906141	15.9433451054612	17.5697942067495	15.8281890382495	17.0528133537644	16.8187312656763	17.4084140558783	16.9381238108492	15.662343022825	17.3443318672937	17.7588638335293	17.3825655779151	16.9325251557503	15.7175539469431	17.1709262934592	16.9128171184453	17.1352420532588	16.4705097078436	16.7779899101697	16.4427600781497	17.2977565613668	17.022099807267	16.9556147576941	18.9176313830179	18.0196924686425	17.2464432469126
X7.54_295.8881n	21.3208015226917	21.0309451757541	20.6653603969869	19.978517878986	19.4461286346123	20.04191188409	19.8930183866467	20.6170221517259	19.1115978781558	19.8171331432629	21.1206434711647	21.2690153812356	21.1874590468779	20.9442465566923	20.8971144126639	20.5350516680648	19.310919034103	20.746136035283	18.8860771187388	20.2107826741789	19.9405559829282	20.5051384090813	19.9751829980009	19.0791858769077	20.5649082522723	20.6445367079318	20.7053450355476	20.2270282630839	19.0993391094977	20.3568408288192	20.0490209972182	20.2292486179457	19.6132714854242	19.8663720890235	19.4767363574385	20.5652597747084	20.2609570990452	20.0731047561983	22.1916287428093	21.054768753373	20.2012534065078
X7.51_417.8726n	18.5310893117761	17.400663484474	17.6214570544734	16.7543136684941	16.0414996541623	16.8125568568265	16.4450446423203	17.5163262689094	15.5811810246462	16.429395725287	18.1704525131508	18.2875186674843	18.1431392719075	18.3733016321207	18.1461177712884	17.8095562447952	15.7910131400157	17.7036424906434	15.3116846944925	17.0559423031238	16.7642904611527	17.2801173846035	16.4832321118962	15.6042471324198	17.1612064869084	16.9164410411387	17.5451479515857	16.9324529343144	15.6007243408798	17.3141808267907	16.8242752473546	16.6378870690129	16.106772864109	16.5306187876468	15.9932668429049	17.6486859763357	17.0557508093686	16.8879368848003	19.1555353616306	17.757676848457	16.8644933211296
X8.66_271.9423n	18.3691247544952	17.7972176505814	17.9130722575857	17.6882266555024	17.3223416431623	17.6012015201398	17.5007498008438	18.0927290060851	17.2772893776594	17.3699834370931	18.4383258265697	18.5032022563024	18.3372424935893	18.2806956027792	18.0604551562667	17.8268392682032	17.2031067157535	18.1343084038402	16.8012608540732	17.7750357141437	17.6883730338707	18.0183739047587	17.4238252531505	17.036407602445	17.7999222671957	17.7259924431558	17.92297585758	17.5848195326167	17.0924020935224	17.96438189121	17.9861641498453	17.6564810079204	17.5874355817248	17.9013621066491	17.4117904221439	17.9535207539028	17.7384307117785	17.7477244970308	18.7886592536726	18.2797686627648	17.9460904642515
X8.66_349.9200n	18.370238878538	17.7290821235937	17.8963334688215	17.6740039614563	17.2031634815533	17.5154554528256	17.4611166367146	18.0709471995294	17.2083876821674	17.3145223471717	18.458802245189	18.5036441880406	18.3750284078473	18.2944396001152	18.0863076502316	17.8419735008997	17.1594148890178	18.147399646305	16.7411651755709	17.7401172754525	17.6810740563189	18.0075639736533	17.3918241973732	16.928849779307	17.7558954575649	17.7360174823913	17.8805793938768	17.5407604816835	17.0260932348055	17.934252903443	17.9498088326861	17.6230454829779	17.5586289826253	17.8778303195807	17.3710580326223	17.9424898115798	17.712395265984	17.7150884705949	18.8104381949464	18.2807790756508	17.9250939882651
X8.63_583.8517n	15.857016152223	15.5015449111204	15.3922058927104	15.0398975016522	14.4231316175851	14.7565881697468	14.946812228504	15.4627776253351	14.1440076794428	14.7953854816687	15.8216525151609	16.1164474781124	16.008070015798	15.7880851087267	15.7309842717824	15.3161689524641	14.3364518142944	15.6339970400962	13.7394093010603	15.0439398637917	14.9285214068083	15.567452121101	14.9598896863612	14.0091043826912	15.4012093826518	15.5357338764001	15.5015449111204	15.0826429961844	13.9495744987409	15.1987603603499	15.0509694423	15.3190289450134	14.5559186866925	15.0839389462743	14.3559047783452	15.380892595994	15.2979251757887	15.1167393522619	16.6055091721369	15.9292848429023	15.2636476501509
X8.65_469.8537n	15.8010857795522	15.5826353001286	15.3189034905059	14.9932020596616	14.5127908985867	14.8655801742722	14.8836064113893	15.4108188621674	14.2816103883038	14.7835196604912	15.7494523293613	15.9847600584209	15.8235339029045	15.6669006681847	15.5517526466597	15.1570798475247	14.4354446680447	15.5347557585828	13.8344285844542	15.0487579426732	14.8804163198965	15.392924453059	14.9626934232316	14.0813707540458	15.3967542018962	15.4816021337735	15.4879115596243	15.0984913237319	14.0235396549419	15.1728215454331	14.9777230134322	15.1270506368248	14.5320165841689	14.9866522939474	14.3994703853672	15.2997923932447	15.2147454429585	15.0681170331242	16.533087118879	15.8314870850899	15.1533803308482
X8.63_235.9207n	18.7546977425016	18.1755007474644	18.2830645757179	18.0256200206484	17.6423912570475	17.954055558152	17.8340325065249	18.473553554933	17.5754894552364	17.712464151155	18.8113463062496	18.8606981686551	18.7115612271126	18.6410028300214	18.4164685117688	18.1903917412033	17.5187435639984	18.5004235045436	17.0890644182945	18.1444714042499	18.0349647201923	18.3804064989982	17.7759340514883	17.3499553894204	18.1535081060617	18.1065638630511	18.3145709050973	17.9465045143294	17.4012442710089	18.3610385264629	18.3271556926643	18.0057656451476	17.9308306892884	18.2546927805038	17.7512388448823	18.3509356070798	18.1000911613279	18.0803987963641	19.1923202633009	18.6366061167333	18.3161581348862
X8.91_750.0306n	12.6593634929752	11.7943641748733	13.6502525858135	12.5656995778381	12.9245779045066	12.1922058155401	12.7153368173952	12.9997687339639	12.4495438717993	12.6611759884862	12.8912569709227	12.3837277303769	13.1090727589622	12.9697857256705	12.8145531277648	11.85805086553	12.6383116354171	12.0775011083114	12.9189820498013	12.6985752778955	11.8652610695725	13.2456900834957	11.9395656102489	13.0419943061128	13.3514124860111	13.149987897561	12.993930523246	12.2909200457151	12.4535982128041	13.4282868270718	12.2195537939896	12.3210512310359	12.7119439403384	12.4037801239932	12.659598450729	13.1268987307663	12.2600984325536	12.7743200507211	13.4381472559626	13.1178307555629	12.7311992327881
X8.63_313.8988n	18.7567286829367	18.2439845557604	18.2946213852536	17.9952582383993	17.5878411024878	17.906544705752	17.8675738934098	18.4189329657225	17.5096976923449	17.7403602413031	18.8174780822216	18.9313562832253	18.7686853646758	18.6378315786732	18.4762458919544	18.208085592765	17.5007030589992	18.5217285251577	16.9868438250241	18.0948756926557	17.9885467492231	18.3751943467047	17.8196158024705	17.2832572297557	18.2084825313781	18.2000328217262	18.3502292495386	17.9581052421467	17.3115718619388	18.2824005599194	18.241748894799	18.0488291811488	17.84415640284	18.1871187279836	17.6533140306816	18.3110955941323	18.107683566024	18.0790862165855	19.3093116467231	18.7081240834876	18.2766686547845
X7.51_235.9207n	22.2653602127204	21.900066521671	21.5935710216444	20.8389134994892	20.3809576195146	20.9744597806171	20.7565653091366	21.5216248834181	19.9798902999375	20.654857706548	22.0045336111037	22.1351339591941	22.0223382407926	21.8643267981047	21.7723802668001	21.4265527785196	20.1742538209459	21.6156620555877	19.768109657778	21.1128886704746	20.8273502975926	21.3502602996813	20.7951575331149	19.9878079647165	21.4265106061808	21.4153012814836	21.6272646701491	21.1399679629575	20.0123833897385	21.2731330083139	20.9543358118888	21.0616635034845	20.4690247691263	20.7286914962015	20.3293673181039	21.5059843092201	21.1610664658394	20.9176219739217	23.0792748636334	21.8604622553008	21.0083845777849
X7.51_331.9096n	21.8396343234243	21.5546516652552	21.1929083602405	20.4893417932812	19.9640648126524	20.5722392966112	20.4269933375843	21.1452315963817	19.6145821091115	20.3367515914484	21.6420447019572	21.7875459975215	21.7074554504767	21.4487731211736	21.4084248131105	21.0466782203842	19.807591174144	21.2517777550889	19.3848104150771	20.7385519052216	20.4467373463523	21.014901997584	20.5031799749009	19.6105065987595	21.085706636876	21.1521983941015	21.2264369689323	20.7450897523975	19.6306006029223	20.8347360288879	20.5560557110793	20.7468656956298	20.0971624765046	20.3577518841941	19.9586747307439	21.0797229979926	20.782101790553	20.5789298201739	22.7135612350577	21.5711245306221	20.6960275556026
X7.51_175.9533n	21.2932394148695	20.7393504408079	20.6666833936025	19.9655551500828	19.5609756499258	20.1174852215933	19.8273498012913	20.5921686244386	19.2192861572878	19.7096404896053	21.0607153002301	21.1096858630294	20.9676685154464	20.9227750950368	20.7764292921767	20.4760738011853	19.3203347949717	20.6524236688423	19.0076921981321	20.2297819350812	19.9911096483451	20.3863253332616	19.7995858383757	19.2046248722735	20.3856628454372	20.2431967608942	20.6440665160192	20.183114992826	19.2698748110659	20.4181376053021	20.1441386935366	20.025774236354	19.6797206518723	19.8885805138574	19.5139476083511	20.6047057349606	20.2136280516446	20.0033429021316	21.9563545172378	20.808027387762	20.0801559391274
X9.00_1173.0447n	19.4209694328334	14.3444682141066	19.2904252605297	19.0572340378092	18.6220538011989	19.1428954745467	17.6291884113105	19.4194320857549	18.7891816483694	17.7481624909814	19.8323459435661	19.1292357513767	19.0125568368738	19.1351331193025	18.513196196931	18.8478989277923	18.1692903729658	18.8449496513927	19.1567615800406	19.0462341518429	19.3039111765956	18.7705935792243	17.3297934287064	18.5727300347054	16.7380610517231	16.1355692321789	18.2199143331133	17.7561346945428	19.2634229434805	19.432920609183	19.6009607590654	16.2558801638561	19.5746776833213	18.7708930790444	19.4314037154748	19.045670229642	17.9650017221226	18.5110099817252	18.9953706662515	18.4632535776566	19.1995439994631
X9.00_1337.0482n	17.6070668892244	11.1875636882029	17.46176198278	17.0999215135434	16.6442357966786	17.4155801461179	14.3301239407955	17.7847500315512	17.2735617957018	15.4938431116391	18.2296466145814	16.9381399335589	16.7462436690309	17.8479329943149	16.5966342761483	16.7520763817657	15.9637264922408	16.8923913940634	17.8805112202116	17.3182362138767	17.6718254102475	16.5844087432699	14.6077108863632	16.6981730344234	14.6126760321043	10.1425949303086	15.6802147823301	15.8827465767059	17.4477214183517	18.0354797761292	18.2034530378811	11.7822925485859	18.1862238981865	17.1316762583814	17.8486926024802	17.5333430087935	15.2044696739805	16.787268230962	16.6646395143473	15.9024525441734	17.8191064053158
X7.49_333.9133n	13.2051919709485	12.6172586532578	12.8286318769898	12.4927168730186	11.7670830541585	12.0868588521615	11.9274371619101	12.8938213384811	11.300810258237	12.0722752780682	13.3858090655741	13.2344343917136	12.9780256128852	13.1213867690274	13.1209533405347	12.5516029137672	11.3966775335346	12.9999971425052	11.0833819721646	12.6127494962205	12.1483952628789	12.7698459061591	12.2321336169229	11.7541380595231	12.5695243670482	12.6151059355375	12.7965735719442	12.2170285850783	11.4112890372956	12.45978472029	12.2894899273615	12.3060571699916	11.5928124305617	12.0289290186582	11.471622118628	12.6731577572722	12.397901187459	12.4743646750277	13.9638879866157	13.1107454292316	12.5496698719203
X7.45_363.9354n	13.2401906276315	13.5496928388235	14.1724826701093	14.3815434845912	15.1360120379692	15.4553310934768	15.3162234704937	14.3489560173302	14.4860791004265	14.1767273735544	14.9426999472692	15.2750484955193	13.8995605921318	16.042830861655	15.4023343413228	15.0973184049231	15.2636645845039	15.2231792333324	13.5619133433349	15.2077563885392	14.7295159302736	15.0484916339047	14.1033479280332	14.7130653938819	15.0198481367723	13.7337792943339	13.841207176162	15.1130529806875	14.1241574324721	15.6461511104226	15.5768958096956	13.9603351642033	14.8198887603265	13.6368336928889	13.7468941885889	15.6215592453682	14.9849651519175	14.2883659935605	12.6451904355432	14.2811124895885	14.301197351084
X7.39_990.2127n	10.6343994526283	11.094284036144	10.8678533170205	11.269773026511	11.1689018214164	10.7537858184127	9.18006368752147	10.5230641956216	11.5450498242115	11.284485954366	8.0379499338776	6.83377786972338	6.93687765302631	8.36032959430934	6.72449432546833	8.95251151010566	12.3755186642886	7.89262639655685	13.0703250213721	12.0128562638985	11.9647270141888	11.381578670043	11.7152064325778	12.6379589051579	12.2295240915375	8.70496160755587	9.16384097097952	12.1581761263517	11.4847021155618	6.61148021607896	7.5026050078472	6.69189631648656	6.51373206175079	6.52407166509192	6.3540080657505	6.55347021093236	6.67896859432197	6.5513748879792	11.2874141610089	11.5627727708584	12.1381420565301
X6.76_295.8880n	21.3136647566	21.4493804940442	20.8296965516561	20.1214439103038	19.3224838274486	20.0930925445887	20.0455276669189	20.6881009935423	19.1030453603369	20.0771055305434	21.2159584518792	21.6325600013663	21.5188453766436	21.123946774993	21.1201709443688	20.7416824187383	19.1894784625298	20.9147386758897	19.0606248407943	20.3303870586347	20.0230613931191	20.7040329812642	20.3147803140079	19.1214467286196	20.775273684681	21.2313559996495	20.7427120886342	20.251047283639	19.0284361260684	20.2945317635918	20.089725447234	20.5606489573639	19.5742663722956	19.8957037452773	19.5215229981519	20.5413265359919	20.4053851868072	20.2236596934847	22.4434340899638	21.4073517680138	20.3203319763823
X6.76_417.8724n	19.3129146029463	19.4798488490101	18.6680851975155	17.7992815319454	16.7597074590031	17.7310622509618	17.5890685793994	18.4497114971311	16.3995837493087	17.7781542416073	19.0440917365844	19.5357534493408	19.492792862201	19.0765428151676	19.0787417673158	18.5748344603037	16.5196358499295	18.7395307483381	16.2919946529129	18.0359120606094	17.6056594252899	18.4409109071861	18.0481816799069	16.5299287216571	18.6066719710551	19.2245145745771	18.6300422951911	18.0483717665188	16.2472510436346	17.9971621614263	17.6016666563315	18.3313161132214	16.8272539671119	17.3778350146689	16.8925813578363	18.3641713616538	18.203234729551	17.9348907061818	20.6393880096037	19.3371663931674	18.0340007393524
X6.76_279.9282n	18.6566575827418	19.0636355382074	18.0675831490087	17.151449969765	16.4194903136225	17.1597240275365	16.9796845169578	17.8428950919257	15.9943503582357	17.1765022552047	18.2573822487903	18.7604834820686	18.6506680755343	18.2546664890803	18.2444057569848	17.7156017512211	16.205919756636	17.9995661769789	15.677640978453	17.4326315854527	16.9481507543338	17.7591047292992	17.4191500244614	16.162392259617	18.1682346997742	18.5841401121841	18.1895468421028	17.6587904912028	15.833453779459	17.3796169241813	16.9922670680914	17.72467505664	16.2299918019109	16.7743672691175	16.221035145012	17.7985774418699	17.6852099818065	17.2376252563544	19.9723548165683	18.5765798352805	17.3213539969246
X6.76_357.9058n	20.2455584479646	20.6437593221256	19.6016301326827	18.6785647961146	17.7999277646782	18.6389055100658	18.525406673578	19.3742367823103	17.3266067090992	18.7007954609678	19.9033242488253	20.4139929476258	20.3338513267481	19.9144579997099	19.9344571235732	19.3843736240454	17.5394669162121	19.6077450340549	17.0522408236854	18.928902805628	18.4490366522316	19.3337193779639	18.9703574561214	17.4983876822501	19.6789067122004	20.2205065298646	19.728270133246	19.1209202513238	17.126667693165	18.8840965701333	18.4667116288915	19.3017661991961	17.6469083541701	18.2486467064708	17.6759392474828	19.3246824954274	19.2193210098552	18.8116509900883	21.6384614424655	20.2501792466249	18.8471047145766
X6.59_359.8947n	17.2657833765355	16.9798681767363	16.770678088244	16.0823779922337	15.2035326943988	15.9942529925829	15.8258052431157	16.5836821927965	14.9538267182482	15.8977440892762	17.1818865497825	17.4998540626067	17.4215887302946	17.0384230137079	17.1430735908914	16.6372087222026	15.0350433469082	16.772953068856	14.9316930641035	16.320029214188	16.0137020967078	16.6031160188221	16.1344633719537	15.0965642262258	16.5431113501307	17.0402954515856	16.4352726974215	16.0578842565601	14.8783583369033	16.3536248568967	16.098234297522	16.3399308402823	15.4851727639832	15.8847481866765	15.4641744181326	16.5218100609144	16.3603660720774	16.2572836391659	18.4247167029865	17.355209840686	16.4160711949688
X6.60_419.8618n	16.8205269185367	16.1436368178311	16.1635623979171	15.4425452714241	14.2206106156221	15.2553920450093	14.9348099422489	16.0277929666191	13.999611026533	15.1482150705753	16.6419563597593	17.0023445487394	16.9694047083635	16.5060907831	16.59948444766	16.0556879317275	13.8892796974921	16.231436095825	14.1385994747168	15.6538565064369	15.4010073793549	15.9599687226909	15.3823238736714	14.0332683960403	15.6573405092885	16.3354100057933	15.6780727316949	15.2235414696487	13.8798001458972	15.7807756260952	15.4313291345984	15.4647723869915	14.6389788828558	15.0012120834721	14.6717059575397	15.9737967981649	15.6254358390945	15.6184313841744	17.9185892936557	16.8362050768253	15.7645348406171
X0.53_367.1919m.z	11.5301118961134	13.0193903809115	11.8817055721489	11.3995715884698	12.3679581299432	11.9766237230598	11.2966288982206	11.1495758168157	11.7785157938431	10.8654810504922	11.5816598128249	11.428921409062	10.9961687140988	11.102753267235	10.6913584781597	10.5096111696021	12.2265253868562	11.6546334246982	10.0918218695323	10.7000324570292	11.0363373363064	10.9487749601093	10.8360983885332	11.7905436787989	11.2931602165148	11.0013796464499	12.1436707477375	12.2305904822628	11.1995133411103	11.9316911793208	11.4843884404253	11.2030458004223	10.9750158327415	11.8922075040842	11.0352284769898	12.0354947074042	10.9961559064771	11.0638603746993	11.5937896186406	11.0326545963505	11.0012564487929
X0.55_240.0707m.z	11.7755772905861	12.0549733687289	11.8431403495186	11.166496562124	11.3073023684171	11.4410925029192	11.3082636874693	11.1213631828356	11.4141985394121	11.9518243317611	11.1834157424254	12.4961640561542	12.5420917021935	11.764187542626	11.7607371181929	11.8976417739144	10.5431356859384	11.9021318037306	11.0183733057628	11.3683538124344	11.4438003324565	12.2444910459234	11.2836120993279	11.5319151558173	11.5611352562084	12.661718163688	11.750206762253	11.8615826103108	11.392752381584	11.3211007878618	11.353421897711	13.0695499505357	10.3785677522764	11.3620982250673	11.7268642595264	11.7318945263012	11.9225955383185	11.3861382485913	13.247019453223	12.4585081003963	11.0780596222441
X0.55_257.9692m.z	8.69168804569689	9.91211878979592	8.70175052937026	9.55436306159944	8.85470535231755	7.35741686751472	7.25386372611729	9.11897750161623	11.2025196380158	9.51734521282239	6.80851307019369	6.90483378706398	6.83076898946034	8.19549703776668	7.93631372529326	7.21554988122339	10.2734821792678	8.32274577409966	9.66573839100742	11.6641253324216	11.4292744024866	11.0384897272389	10.0557980087903	11.3062635882374	9.95709364089507	7.06866095416216	9.76583900196347	10.5620866152694	9.21851591491256	7.15720697531169	6.82998534287143	6.78237790563129	7.59512829854683	8.02741295606091	6.41007786314574	6.68994799140499	6.52479790618811	6.44164137343899	6.83563719280494	6.79095902568908	6.55690302332596
X0.73_134.8935m.z	9.96547931437671	9.93719656869149	9.71327664903647	9.63749861995105	9.62473823031286	9.72531032080529	9.47045865966741	9.72028851075622	9.44800390166197	9.1528421345097	9.88648247652415	10.011945625608	9.61344265873569	9.81298817126177	9.44936552666274	9.40345052681072	9.48369713979059	9.65256011506108	8.97959787124053	9.62383543828376	9.52034967923664	9.76071975074505	9.12173980515376	9.51650041844758	9.70230474752989	9.34177373309243	9.81397926101277	9.51579482170649	9.35840590058523	9.77053273926758	9.51247683672615	9.37630645453173	9.31034899302323	9.46831512962865	9.23304512539815	9.77521191283336	9.50795384560432	9.18004527315589	10.9701543952539	9.7093487057236	9.48022393864263
X0.77_203.0015m.z	11.9806068029429	9.39886128300712	10.5035451730906	9.8114885384971	9.91101051097632	10.2322347416895	10.4344308042913	9.9801434745111	11.1608762909864	11.4945935192952	9.5171493266797	10.7761049544957	10.5404631953972	8.47269311707066	8.43708747986433	9.51743340640177	10.8677571016986	10.9134731300409	10.9504907397456	9.87648432582011	10.3019710247178	10.3173492286135	12.0252944843091	11.3972083828658	10.87445503688	9.40587808916574	11.327177494854	10.4171956012684	13.0361273430088	10.3885135760717	10.2238898853479	9.97577640525425	11.0930921895948	12.2152054878363	10.6144655435327	10.1218807619806	9.62126373721682	9.82442770220782	9.94017536044272	9.7980507604075	11.1641724456378
X0.77_502.1015m.z	10.9728761978037	11.4994382848938	11.1133437997238	10.1959037486821	10.6614504142635	10.2356402865473	10.7924338246647	10.5012110244517	10.1207626742774	9.41688130263085	10.3238243738565	10.8911513306492	9.81762508379522	10.264821614776	8.34051040853867	8.27699868847408	10.7652527992554	10.3277258280533	8.88758959108903	9.85794907945629	10.0531082614901	10.5101586600751	8.52279928207191	10.8591880345274	10.0998151168595	9.71075708597803	11.0114401034295	9.94194854306681	10.2113575258502	10.630270916592	10.7006479282802	9.25925138518946	10.3676096266892	9.62475144976323	9.19675696017229	10.9776993995833	10.8443690326379	8.95241652539457	12.6634874757612	11.0110559994062	8.76316184647322
X0.92_416.0453m.z	7.98310633603846	8.18198387010841	9.57378488502326	9.87573610199429	12.1943084216212	11.3685980000935	11.5491978088309	10.6324709469772	11.3932120987356	10.7509759487531	10.1198490456385	8.15236350659201	8.4782577795679	12.6618851470435	12.0663483881625	12.8590379102679	11.8296261562738	9.99210530228476	11.5648685182998	10.054533561269	10.4163533363088	9.98686556769422	10.3919739591028	12.4097371465682	10.3887994722197	10.2553483078026	9.69013272814342	10.6737925264518	10.7087936378044	10.5440148707863	10.7257051885004	10.1545830512803	11.3215358309744	9.1088888744607	11.380315408647	11.7481123232501	11.7820281994914	11.7695700398313	10.5923690787195	11.4160770489111	12.5796139493733
X1.01_1283.7567m.z	12.9882413438285	12.5666017819235	12.2920446949795	11.8591265126637	12.919802796598	13.0613774971469	12.4213733522661	12.3292174012194	12.7128870597719	12.9166909679005	12.5871784277094	12.766553361376	12.9636487539517	13.2058147685451	12.6183574170028	13.1783019809999	10.8234652523383	12.8331705011914	12.41498802705	12.8671594220962	12.2109252896274	12.7196190099461	12.487742200793	12.2715519003289	11.753452757381	13.215344456314	12.9601752768167	13.6614644392016	11.6192424933393	13.232323977509	12.0819962881913	12.6253768657446	12.4918565421299	12.530564624188	12.2165622360635	13.6823802066384	11.8927039876135	12.6563346916165	12.2219474570284	12.4800354669268	11.7783631036314
X1.06_388.9494m.z	14.4375417988081	14.0399984218793	13.1399963810381	12.8546201515587	13.2668101782973	13.3339794432893	12.4342791385183	13.0647005237258	12.6154718115388	12.6412257286217	13.0637603692555	12.5420654422642	12.9333264204896	12.8809692700139	12.7385268499772	12.3309204333573	13.0019442711635	12.9833092575046	11.9212246557258	12.5844301535381	12.7265429365656	12.5649336393909	12.766573711492	12.7056283288704	13.275654659779	12.9816270157909	13.781013238675	13.3595864285068	12.5844360771666	13.4571176100428	12.9189327565773	12.9710769028009	12.1522063979377	12.4078008843593	12.3821843511449	13.495667932893	12.8323665157595	12.6650583055257	13.6682887458571	12.671298739785	12.5967388720207
X1.07_680.5113m.z	10.9832012781805	12.7483066876275	13.2973072550012	12.8260022740515	13.9577064612346	13.6980007917615	12.9492246492694	12.1746748639294	14.5080575006067	15.7989319277678	10.6740989127645	10.9732337320529	12.0139286234065	10.6557976552411	13.0357260401756	13.0632909887997	13.9701133864172	12.9922061928335	14.8228747093697	13.8264511227363	13.5394838169181	12.7281355246062	13.7797433790084	14.5837946060993	13.259832034593	12.7498478533606	12.700019829277	14.9028620181666	15.3715635072893	13.848619075199	13.0006225566598	12.7715672496056	13.9722619391225	16.9032433727713	15.3926279488232	13.4178581261461	14.7499238067128	14.6143049826292	10.8450109065937	13.4310389529526	15.1044505251673
X1.10_371.0600m.z	13.7854011010895	14.2879941808273	14.4451323997789	14.5581216765981	16.7891745224029	15.897203299817	16.1335507466286	15.5047385153416	15.8772919140815	15.5006064911591	15.1147798665367	13.8404178629806	14.0291667740871	17.3974589617069	16.7230803513884	17.4262262071387	16.2542880444427	14.8940289883593	15.8952593438894	14.7955486299846	15.0357358907999	14.7634590221585	15.034431605941	16.8284577681342	15.3809787453	15.1469011426121	14.5462765434377	15.3903648035846	15.1448538715716	15.2124642029713	15.5216092004466	14.9594902134798	15.8143416407555	13.9596261456241	15.7533523300505	16.3469949081804	16.432609798138	16.3021169064439	15.5699816563291	16.2599240076557	17.088365716893
X1.10_204.9808m.z	8.98248908106335	8.46719974069417	8.17156207517634	9.4516990236123	10.1456902412701	7.75941635864839	7.91867401879786	10.6945212027299	12.4186726336532	8.70348408518944	8.23150691818691	7.22256221615119	7.51898155795405	6.62335130963882	6.55154545097346	6.63924720033101	6.43075652799297	7.68117175399149	10.9892193100835	9.33345125090849	10.452653605192	9.9115602808296	10.1890947616328	6.4376755789457	6.78738827870762	6.95014737113087	10.0503265925259	6.79626229798307	9.35917642041959	9.75578670011329	9.58780897783769	9.75408904937099	11.1528120791764	10.9216059184083	10.3953233042842	8.0415037041487	7.55042321886645	7.88583394790477	8.17151594754519	9.06010212054494	10.3293625943795
X1.14_323.0195m.z	8.70230030571735	8.77606540053496	8.9255460655998	9.61001381368281	11.1104810296536	9.95138187930758	10.4416618057652	9.81098173297718	11.0881939220567	9.52375764324323	7.71714218453458	7.36768511509897	6.85600231713366	7.51984680025629	7.59505369656313	8.62330937764249	10.6242891344852	8.21223365884469	10.4149070527143	9.72021153141415	10.1143629885847	10.0943079957139	10.2654566927349	10.7526508027248	10.1372992639508	8.74023704809527	9.47324509266652	10.3459854873646	10.5657328906435	9.06834507337757	9.53290809204601	10.1220082506806	9.99417546169522	9.17811479475029	9.73006880917293	8.88781267626568	9.47854030980947	9.45879471531013	7.07947778542419	8.3006210446015	9.09419222709548
X1.34_303.8870m.z	15.7063986823688	15.3396663766337	15.3065778524034	14.6572400918029	14.9962230285816	14.9164438600435	14.5192593132396	15.1247979994955	14.3788787561247	14.3027519032892	15.273287906798	15.2448374551973	14.8845947797285	14.9482411876604	14.5420848051674	14.3633257671864	14.4032901011971	14.855618603612	13.9008560506178	14.8403656715334	14.5719229393599	14.7723518153615	14.1306525730769	14.6007133216262	14.7994855405262	14.5298496997701	15.4679135628444	15.2020146021868	14.1896552585094	15.2340131667888	14.7780726707736	14.4533236282439	14.4371321619955	14.2575198833707	14.0613927476067	15.3650100361025	14.8592755364115	14.3271895365816	16.1074047882939	14.852099055375	14.3433769183059
X1.36_177.8690m.z	9.57298739003986	6.90099461680419	9.74050363456476	9.31478091059916	8.4918233572706	9.42033621779537	9.31526308698452	9.96579887368184	9.55880586504134	8.83738118902936	10.4483612724771	10.0269553012316	9.72100461184729	9.94402356383632	9.71124304436008	9.65725996275058	8.70470047809218	9.75325274803917	9.42483552631893	9.67121964836216	9.83369717486674	9.68554996761261	8.5121397992005	8.58777265344156	7.42001964229548	8.17632115856044	8.57034352324551	8.46376730105744	9.64629276869366	9.83865725331857	10.109085145626	8.68039447750782	10.3257931334855	9.38502600044442	9.88158165639418	9.29546350332519	8.76522247968812	9.42564966087948	9.026947527649	9.83995675878657	9.62678982289827
X1.37_274.8228m.z	9.99026579586415	6.92777847645385	10.2338593833052	9.47363309793413	8.77036968005989	9.73585890577302	9.66340236116387	10.1855817061506	9.76189621931299	8.84938645895111	10.9848125711659	10.5038794015316	9.77171692368712	10.3098946862634	10.0479446203647	9.85838079822033	8.70678804562874	10.0770877043293	9.83140346784259	10.1027995746318	10.3683595677348	10.1510857972279	8.90891856677919	8.82608889701353	7.23602356813032	8.12753140786008	8.86410982921157	8.49523037941287	9.90067988374845	10.3643025802821	10.619949959554	8.78421153951969	10.8791433226093	9.70838500624355	10.1522082656661	9.64299988657931	8.83901856906339	9.82081655645159	9.37226765827547	10.2290174855827	10.0861813257398
X1.39_270.0261m.z	8.87696564220129	8.61356444328296	9.19987706628468	9.36064393286281	9.44374410325578	9.39488049598994	9.3771436652222	9.52974765488502	9.39966286871737	8.78594833339552	9.2690027903347	9.17120146759162	9.20286919140092	9.31074757064845	9.05604221325632	9.29301518717536	9.92123419538443	9.41750174828748	9.88505856999979	9.70751411339995	8.98702840410346	9.04376709420393	9.86192142958225	9.83321445071509	9.30184521363996	8.97619079953525	8.79819530057745	9.7375627762628	9.56965398166001	9.30620081157655	9.92559045369436	9.04316142681305	9.76451934445575	9.30649011055908	9.21359771303393	8.7748698586017	8.60638856537881	8.91511248449929	8.81210333758608	8.91087168678625	10.6071641562694
X1.40_618.4290m.z	11.5119657487473	11.1902692174997	12.9749093439902	13.3848755603399	13.4747527550949	13.8535656693312	12.0329289348623	11.9904684519394	13.2321535414091	12.8390496364603	11.520288078355	10.0101321176394	9.33519862198492	11.2227688827113	12.1374594723651	12.5228929805546	13.321036527533	11.9117826305435	13.5571124837734	12.9154982951563	13.4881915331896	11.9833917369957	12.6290011907288	12.8455581336775	10.1041231880689	10.3744390997584	12.002910032292	11.8028763082319	14.0238742829293	12.5248766618041	12.1339869380559	11.7369061967388	13.2487076046746	13.5761460254444	12.6836157494424	12.7324225671849	11.8776773014809	12.5380646373954	8.76392087020364	9.95611202463911	11.9531752307293
X1.41_467.0903m.z	17.5860128959109	16.9069172090661	17.0812578285368	17.4171989052161	16.7070853305036	16.9009044723352	16.5080326303952	17.5958880530144	16.8698743718881	16.4852421119522	17.746112332168	17.977872747816	17.6729820015081	17.5994842876599	17.0777308760268	17.2515684345065	16.3462528263986	17.3374228552361	16.2705819189685	16.850357253509	16.8218341443599	16.7430797494955	16.2125237528257	16.529464571653	16.8878533241688	16.6675413076237	16.3946340456286	16.2078581169365	16.6368525483418	16.5573000776977	16.7621936722559	16.5454635312883	17.1927271945965	16.6157389094318	16.9204177981908	16.9611490707882	16.6000573945763	16.5386626433871	17.9693323266888	17.64627286354	16.3537262749227
X1.41_443.0199m.z	12.8375310771793	12.1801844592204	13.3904874553307	12.7867643055215	15.3894757442349	14.9526987584007	14.6224393242906	13.7360046158246	14.6095928777448	15.0645998111933	13.4065212585777	13.1456540378626	13.6257751268463	16.5411542042129	15.6843303493178	16.5615157116802	14.4239307234715	14.2997731812967	14.6523109470061	13.4651806398918	13.9133574747216	12.981019431528	13.1136983627808	15.2232785279076	12.9117885543195	12.5685506671429	12.9654163088336	13.6469158412045	13.8307461492732	14.5506433979383	14.3129655260362	13.3488827745174	14.5627817868528	13.0656320483037	14.6628317970176	15.5999434991484	15.1032694968728	14.7019190957914	13.8857666217069	13.1925896110002	13.7579570333827
X1.41_1044.6305m.z	14.4549005290708	15.5061700794654	15.7157365843074	15.1751367432945	15.1831624944454	14.4306452652148	13.543893315862	14.2873859329958	14.3859861649287	15.0703144607842	13.8199710859037	14.2178917079653	14.0505906207499	15.5741946971687	15.2826762854023	15.2140271796322	15.0552560131994	15.4158069198941	15.2580345382626	15.3138266064168	15.8920374756425	15.1659857292892	15.1687683259784	14.2237264389319	14.150522117999	14.0025989590773	14.6579403382949	15.0542679004561	14.951921772424	14.8252122945594	13.7363964254992	12.8098471577782	13.8372632473293	13.821497950395	12.9613326097999	13.5504708117066	12.8202391472702	12.6660633944272	6.98587499611704	10.4417860691577	8.92848687833101
X1.41_650.4982m.z	11.5835243324848	13.4656637332419	13.2805032663623	13.8289860268143	13.7432209494062	13.4225862509682	11.9172976197128	12.4663480106056	13.6211823660604	13.9464171242457	11.6948022106208	11.5321275219149	11.3867425773104	12.1939812897881	12.5292247298627	12.5384114052965	14.1339417005521	12.9035992083411	12.9718014435838	12.8847808889495	13.4315162552188	11.9843050263862	13.614568882648	12.8873509393302	11.9450107153812	11.4585617896282	13.0024995523637	12.6896084185437	13.7967272409069	12.4859546899454	12.4570282918066	13.0541080956502	12.5034704702855	14.1547816245443	12.1664170862112	12.9354237844262	13.3521302240461	12.9879860518978	10.3071497308927	10.9316356923134	12.4646129621249
X1.41_616.4313m.z	11.5357019704894	11.5078598082086	13.0065776178396	13.4579734014741	13.4687425891919	13.9349289478343	11.6449475850811	12.0382578289793	13.5105017076487	13.0644106346618	12.0532411207378	10.3609403558299	10.8268916861282	11.1436863262694	12.0430468007426	12.3406939250093	13.4686150177093	12.0425301944452	13.5867421861341	12.9373101905019	13.2691707462335	11.9279757689485	12.5336797591158	13.1337655818729	10.260650480079	10.4614843920023	11.911350202562	11.9329435321205	14.0423587216834	12.385319213923	12.2534654486492	11.9245947219984	13.3299272706927	13.5293052677603	12.6891680562941	12.555966928134	12.0052624693198	12.4644027278094	8.13989281444847	9.7049211089812	12.2054076213889
X1.41_902.6043m.z	14.2988988585935	15.6710279947334	14.6705284455011	15.522643136382	12.5601114740748	12.4379279356412	11.003093205736	13.9296496118934	14.7952170086359	15.3486856650594	8.62813677908188	7.62373230444454	9.18262308638236	7.88693318331284	6.67315713556958	7.72852268487406	14.3512917261548	14.1563808341475	15.8866408514844	14.8388899442496	15.1526105743993	14.2821977013962	15.2038701725606	14.4302293901866	14.144775284777	14.4045241613141	14.6153351424178	14.4852070549473	15.5015449111204	8.32172361668562	6.60473955625054	7.31310742914022	7.96454164007974	6.61957320965374	8.67502340034047	9.51540785425262	7.51383713449421	9.21206620596899	6.98630512507091	10.3757804024376	6.49077057493568
X1.41_469.0962m.z	12.1668127824358	10.7348987439478	11.3744674402874	12.2328547148703	11.2445384370168	11.4027928459866	11.1841016263579	12.1260623166826	11.5511672069878	11.1212144319364	12.3151143733311	12.4892686205086	12.1810765328774	12.1081309897654	11.5401868605634	11.952728449311	11.1483706938686	11.7984747706633	11.0523042673284	11.2628294083048	11.39173256531	11.3568965868167	10.6175662488153	11.2065127150003	11.2304377596255	10.819708878674	10.7265843877491	10.7633354973693	11.3651231288138	11.211855501662	11.4598857822591	10.8990067468624	11.8147574197386	11.1399925909997	11.8464432035138	11.2722080561301	10.8727730323214	11.1587568046368	12.4760512984181	12.2527010937605	10.7448422242867
X1.41_377.2011m.z	9.28878698017825	7.14116949611927	8.75094993306713	9.92553699347423	8.3484357558542	10.1736928006048	10.7678565772142	9.71370737196705	10.0644366587761	10.6355073667787	11.2559731029373	10.6633834809674	10.9603789696759	8.62333352117336	6.66238874820651	6.64120186603252	10.2543120203549	11.3768342122358	9.1335237969706	9.46047086421231	10.0413435743424	10.3672893499252	9.84548231486255	8.90474991363206	10.6809718430713	10.3617384786434	6.73978089037468	7.52673040123966	7.99440859971824	9.23349882169297	10.1972651227021	10.1199702295099	9.8863823412865	10.1155477572013	8.91884108065711	8.7891157974167	10.4197927541286	9.56486019161955	10.545179664164	9.82046696546627	10.5357837100755
X1.41_900.5892m.z	11.9868580675345	13.3526332333504	11.9159055343871	13.1467313698706	8.3148779859329	8.59283716628146	6.61105861945369	10.7544529117648	11.9821022372661	13.1430594003649	6.72669024761477	6.79610399014359	6.67015122373956	6.73831201145426	6.63668987429514	6.60831833851344	11.1520683699563	11.6457340383623	13.7977528727953	12.2325254058242	13.0107199812836	11.8023829762119	12.3767564021671	10.952688120381	9.93921322095924	10.569301744615	11.9478658967006	11.6272810955548	13.4308899517443	6.54480057164202	6.60946948873467	6.69183208443126	6.37647785998937	6.70080137806393	6.43705449759835	6.70792264210884	6.52394692751426	6.52277350156216	7.15828332218536	6.77779136598132	6.47768958967906
X1.41_599.5011m.z	10.0214468377876	12.8547386506151	11.5207613517042	12.2558212727259	12.6995502335032	12.6751191715425	10.9059374288353	10.8773260930634	11.7007784602992	12.3087019079503	10.357864529557	8.81934330122013	7.8531366359824	9.36417346711852	11.164486265341	11.318853399778	12.7428441061809	10.8530837401208	11.9763225690727	11.9177500101027	12.0863875869433	11.262427220515	12.7499575735532	11.5792334634776	10.8413181996192	10.9356281189953	11.6985279389881	11.7675566097862	12.2082132484933	11.4689221018106	10.6500686111104	11.7524937838586	11.6177336220098	12.2146021339493	10.8880558629086	11.9639420996127	11.5153955021574	11.5703526407459	7.96887158370875	6.78172878704541	10.3910786087708
X1.42_300.0400m.z	14.3369556172423	15.7823927960156	14.6280935923714	15.8170695279274	17.5746670176071	16.6462830280269	17.0149047094898	14.5993552170459	16.2682788663403	14.9388102227703	14.6656812408394	12.0813200796633	11.8923028525071	14.6834956648852	14.7923728599884	15.8030598015786	15.4020449757257	12.8935957082316	16.2779350478366	16.6089103877301	16.2725575781979	16.3274059087024	16.5860501925377	16.1259834720735	14.9747262175553	14.7128118849898	15.1000962076978	15.413168271464	15.8652304222999	14.5894440862949	14.7480256339557	16.5157156207348	14.3917075149688	12.6267029499635	13.9770655747217	14.7245578535183	15.15026832279	14.7578939686268	11.4192361511033	14.2426078352652	13.8959506730274
X1.42_259.0135m.z	10.7631114794041	13.3149098105865	11.282971359335	11.2998205974873	11.5460265884798	11.3145704909604	11.8910411991471	11.4107733458108	12.131401612841	12.1783221611898	9.22002799377941	10.3664795008118	10.0827370750535	10.82070806716	10.8589299982653	11.0212572544024	12.5992222560127	10.8119636336207	11.9574971938539	12.1814180617343	11.7811146540058	12.0415944186734	13.1633615484295	11.9438555472076	13.4190765931991	11.5648293050926	12.3813140159001	13.1207048918715	11.9568147289164	11.7080864710849	11.9088543265524	12.7033881065315	11.6634897154065	11.7131071558722	11.4430952152527	11.5325172623092	12.4403031041359	11.6594424458708	9.37119883117277	8.57985004749657	10.0275991974835
X1.42_349.9975m.z	11.0876159576528	12.3154311173862	11.4606022868016	10.0031642471317	11.0783218625801	11.0950535906576	10.7162479919252	10.2167898396207	10.1890989141237	10.2999714492507	10.959011311985	11.4169231329854	11.0235930348306	10.3492963319304	11.0672812730831	10.6188760336284	10.3175305641331	10.8377477989162	10.1248635213799	10.6756650614659	10.4802174786886	10.7752460565604	10.1890567677991	11.2824635887889	10.8276276646973	10.7877119572898	11.0130758932899	10.8534700120664	10.4369318284387	10.981381472205	10.4044413555525	10.5473984304968	10.3239690743891	10.3755965130909	10.4830796345209	10.7505124398114	10.4855230061553	10.7671267997677	12.127005586279	11.4693618119441	10.6111523199659
X1.42_954.7679m.z	12.8816686124783	13.0846303598518	12.9729636485052	13.0127852956775	12.2837124966054	12.8406733853717	12.6379627892451	12.5179262112205	12.0325363172678	12.9638222349063	12.9473432011793	12.8067858044429	13.3550801410872	12.7686651742537	13.6593300300755	13.2983246293541	12.3782001596807	13.1298430735168	12.4432044343594	12.9260190560715	12.2859923369036	12.499922976583	13.3803879724355	12.6692749587721	13.0912136277741	13.7920898688243	12.8118980481691	13.0093158568345	12.1852350498722	12.553447284124	12.464594415038	13.2905718498376	12.0109937692873	13.2259080724274	12.8713551208845	12.7659858845299	12.8023677117114	13.1577756734872	13.5905990946984	13.999143305442	12.9450438934721
X1.42_1088.5222m.z	10.7081643601355	11.047265809028	9.12584816575727	10.3681268674349	10.4677749523539	6.5915125445408	9.86800629706953	8.19367774765152	9.99540672208256	8.16256044972936	8.01985464469548	9.37264956345665	11.2600005798308	8.33081267344051	9.87805189112393	9.75845090586324	10.4054549627664	6.75051890158934	8.90862992176576	9.78408488981484	10.5804346340772	11.0019964692155	11.319365650604	8.79645963424011	9.05647697344349	10.480074395969	10.3813779326534	10.4033786253041	7.6063603195905	7.80951371693211	7.74942206564578	11.0254128110238	8.46238967350652	8.64262488587067	10.3929042549307	10.5504124745835	9.49920551181387	9.55874496016403	11.083875772038	10.4742345721618	8.71493948788336
X1.42_851.6829m.z	11.0466387404382	11.540437357448	10.7810723637594	11.1311060881183	9.79477996368529	11.0876844678004	10.8365428779237	10.2674484542467	10.067486516569	10.1127114869297	10.8689741973702	10.5810928340141	11.4951533004242	11.621833041439	11.8356803424349	10.3337311850935	11.2790047331653	11.1410119871149	10.7073530844326	10.0924658477647	10.3758745245201	11.7678147917031	10.8842461117612	11.7702730151857	10.3150626450573	11.5251850239493	11.328937648923	11.2494628621292	10.6530513036862	10.5645289558295	10.6135624307368	11.0633556718983	10.3643357543193	10.623187167901	10.1695922192876	10.1668459605345	10.0200744864287	9.84763330807093	12.3475148150495	11.9054109257124	10.810288183656
X1.43_195.9761m.z	17.2277273044984	17.8342440361221	17.1445437832905	16.8411590128443	16.6793258149227	16.8496559816777	17.0444132817919	17.1697561520001	16.6277560037635	17.1727523063607	17.2652975438563	17.5572761760871	17.650724241484	17.195992052116	17.2981561092281	17.1470681136387	16.6952058792194	17.1965864465201	16.543717234373	16.8439340420554	16.7352363506413	17.1659074943758	17.2837072763838	16.5487380533061	17.3813515141685	17.7923537252311	17.1220551771666	16.8869193591582	16.7404222066148	16.638473055889	16.7632257981617	17.556743459611	16.7347842291018	16.841145430236	16.7612601738398	16.7481699013597	17.1471491613651	17.2065123133629	18.0005565948915	17.7142914434366	17.1068244779222
X1.43_128.9984m.z	11.0494526893128	11.5703923593273	11.0469263645791	9.85505171939967	10.7714985000143	10.7479016834931	10.1342203691104	10.2483815200824	9.49207667002371	9.97405767087752	10.4348962663671	10.3794240114884	10.4369295770066	10.01797500999	10.4699200373122	9.81215478709846	9.89813324331793	10.0860871714966	9.44109120414698	10.1026523315384	9.79247964411649	10.4093805297645	9.96767973861489	10.2148702002244	10.4332374536388	10.5667855093643	10.7918462653569	10.8004198937673	9.71960325720364	10.6319619097383	10.2364488541594	10.3798587403453	9.8364329026593	10.0249321487828	9.66085631773947	10.5480873938174	9.97169703901502	10.0684259190259	11.6921312467883	10.6587239775413	10.1900611414453
X1.43_130.9954m.z	10.23097304459	10.7734345175682	10.0624302521742	9.14666977698454	9.8644287462584	9.79400647471462	9.29979139312602	9.25479802705077	8.71493297320284	9.19278643876884	9.39241304293033	9.47583624832735	9.51372892092883	9.17219208082131	9.47513367388006	9.03701194323218	8.91654160663687	9.04903717109322	8.76389846215869	9.37178665830119	9.04109129847302	9.41181519649461	9.11847647872812	9.60330465463277	9.66052324485815	9.68655785648012	10.0850534406405	9.92550882725766	8.8112024288731	9.58621899103233	9.47238218235924	9.54415315068835	8.97263048655263	9.14770355028458	9.06088411564249	9.71834899256736	9.20212958245798	9.23993463812752	10.8115447205215	9.93317048064131	9.23542617345241
X1.43_408.6565m.z	11.4032986931054	11.8305536288655	11.4013123910262	11.5858621415945	11.3175562277753	11.4398301300049	11.7575450929579	11.6038377907262	11.5441317442908	11.9429488179375	11.5937728562602	11.9231729823022	12.2775414546119	11.9196321455879	12.0500123005189	11.9441065347816	11.5713792111366	12.1153345616787	11.5130925364397	11.5786472018703	11.4733126702992	11.8978325034595	11.9279904610442	11.0329790655792	11.902102004118	12.5160723776097	11.3742119490177	11.2453258675724	11.4129653819961	10.8793206365145	11.2846893953059	12.2090157091322	11.3966352074183	11.6842098584753	11.6987862386125	11.0862116424111	11.7756891244961	12.0504842381345	11.8972487034179	12.1564309737395	11.7469821499274
X1.44_140.9751m.z	16.9495827938991	17.5686778801046	16.8738335855849	16.558592034051	16.380734015703	16.5733689126859	16.7574364942273	16.8844658638471	16.2779013803713	16.8732168584652	16.9497777843456	17.2218746928655	17.3757790232258	16.8632151596499	17.0744432246431	16.8961198045872	16.3836104889846	16.9110204559618	16.2560692575548	16.5823628564191	16.4652817444462	16.8852820108533	17.0177039134164	16.2214076480024	17.081974890481	17.5167288173646	16.797428853541	16.5959617679083	16.4615955628018	16.3794553465587	16.4817747273788	17.2646453401714	16.4727151096884	16.5391800142901	16.4680225645739	16.4549268659311	16.8473010587452	16.9850135564467	17.7152216452888	17.477983517244	16.8585458978835
X1.44_144.9692m.z	15.2632592049127	15.8311425598976	15.1819506229165	14.9195448215033	14.72886140969	14.896572978686	15.0781772710113	15.2013806553018	14.624777253767	15.1850683381391	15.2559831131129	15.5009852259482	15.6270550241936	15.1811845436838	15.3806184008665	15.2173967563037	14.7432532367651	15.2044816042183	14.6281147761082	14.9239099159818	14.8295350934409	15.2183516424423	15.333256939979	14.559267302737	15.3650256998117	15.7794431516356	15.1164862984654	14.9110831351578	14.820508296125	14.7178075565855	14.8395296592569	15.554894629114	14.8342457601695	14.8895885853729	14.8224822309887	14.7837114067155	15.1845233114022	15.2992139103022	15.9725159633907	15.7496214368792	15.1773472490034
X1.46_125.9455m.z	14.0745769226495	14.7584101558896	14.1133965062445	13.7571617857366	13.6437917654424	13.7831056767141	13.9300860203153	14.0349544122394	13.524015167725	14.0156160975419	14.0963245063844	14.3400644992327	14.4269033741478	14.0335328580809	14.1978036232446	13.9779706863833	13.5991399331286	14.0567723967636	13.5273635819919	13.7775122457486	13.6872005521966	14.0323863977652	14.170643975247	13.4151104319859	14.1783851251777	14.5089803050735	13.9055842179523	13.7912005031061	13.7062804695359	13.6088762105821	13.732393192141	14.3511918528446	13.76693062103	13.7315697449934	13.6695010941127	13.6014235466503	13.9847427354046	14.1913830060579	14.7170519009	14.5647132513037	14.0525605711291
X1.48_410.6535m.z	12.4159989052625	12.7142996926011	12.1978360158909	12.3852769691942	11.9479832142003	12.1305584923448	12.5125994483019	12.6297982247878	12.1542082503749	12.7690243738798	12.6527795221281	12.8717632480935	13.1803645156385	12.5817033171113	12.6860638836642	12.8557783087405	12.2096449736924	12.7838149388796	12.3346631435928	12.2497401210243	12.1672848093854	12.5975935084536	12.8967925931832	11.8102387856433	12.8177294160257	13.4048665467175	12.398034898529	12.0803334805529	12.2658646243557	11.4840347721277	12.1234085620144	13.048636123084	12.2776336402036	12.2087010138406	12.4585737044625	11.9170465728678	12.2562219331543	12.8732487815104	12.7444124856129	13.177349632108	12.7485534025127
X1.49_498.3265m.z	16.786035278007	17.5722979917458	16.854063404456	16.4537032947418	16.2554109703294	16.5275961764439	16.8094182452617	16.6946077833302	16.3782880202157	16.8229796285112	16.9537531392965	17.2086445443653	17.413654375668	16.9070095010754	17.041471270493	16.8392991533744	16.3273127132563	16.8775436448391	16.2597856922905	16.5266863610349	16.5033122825816	16.9805129444198	16.954936207045	16.2193919522267	16.9662870297108	17.5080693579034	16.6818788721167	16.4144813711294	16.4932350137669	16.2002029311591	16.3178678511061	17.2291799031745	16.4601854069079	16.5049491107167	16.4370333865869	16.2601174099987	16.7595939927157	16.9001685858361	17.641502592026	17.4420162961015	16.7983393590812
X1.49_276.4805m.z	10.095251497121	10.8630730664617	10.4706655593032	9.47394781005917	9.93561538385722	10.1569640382852	10.3446727803237	10.0534541098508	10.1614634690972	10.2916673939522	10.3610593855693	10.6551312117107	10.6679080548724	10.3662717733356	10.3054288426313	10.4093764810429	9.78265587668624	10.2217609128761	9.72000578139368	10.2628559244652	10.1737952861982	10.5874110696173	10.1770355887232	9.89944339811838	10.7417849788719	10.4483425545337	10.0462646152487	9.86413745806409	10.0494736191841	9.74724103203278	9.94948351078837	10.490653403529	10.4121209393994	10.1450699019042	9.82882016407338	9.70020911126144	10.2990340978266	10.1773989715613	10.5889163223761	10.314995135002	10.3284650101186
X1.49_108.9188m.z	11.775163703719	12.4063167189868	11.8643589050379	11.6337579509354	11.5028326310255	11.6387923080338	11.8720308530632	11.942230974846	11.396260444435	11.9079810901358	11.9798357566898	12.1987917096572	12.2777944613894	11.9315636041877	12.0897796867493	11.9151880989179	11.4743549612601	11.9811652571249	11.5626943855723	11.6245336121019	11.6175498056243	11.9265946543371	12.0589131945696	11.2621767417134	12.0799401761758	12.3797757377766	11.6837446228643	11.6207981444956	11.6046492182001	11.4082520404637	11.6413341158206	12.2583520332247	11.7189393890067	11.6550348276329	11.615484731636	11.4476335617196	11.857095888181	12.0852833153724	12.3618949459942	12.426189445327	11.9871115523904
X1.50_127.9427m.z	11.6716049999152	12.1978107618777	11.6817980935507	11.3203024635355	11.347461212893	11.3746548957324	11.5798954613353	11.5522293163824	11.15868312579	11.5583416733348	11.7040581727054	11.8599143745352	11.9111078655771	11.6170092825821	11.7565372408578	11.5441070155797	11.2463749349223	11.5733500462532	11.2140649780288	11.3019140749678	11.3450290362021	11.7248763377706	11.6506950654399	11.0329801976161	11.8313583695256	12.0518459281864	11.459851820837	11.410143424412	11.3308844248382	11.1877787982872	11.375201618598	11.8825504461659	11.4884166173268	11.3719523842856	11.254177646172	11.1931339948491	11.6084490246564	11.7579507381966	12.1248870321903	12.1085201058971	11.724634632005
X1.52_498.9922m.z	16.8623572102294	17.6894284378318	16.9268559000992	16.5116215298138	16.3055447973474	16.558141624474	16.8481726826986	16.7459208479429	16.4596065724829	16.8981558306469	16.9474814718465	17.3063804708147	17.4938676365778	16.9519855804096	17.1169014699459	16.9511894285087	16.3861352149709	16.9572529912968	16.3078689413811	16.6602541962699	16.4905839751279	17.0228899792012	17.0390551563375	16.2843601993746	16.9856799892349	17.6042631045459	16.7161630534805	16.5428743384141	16.5431215290869	16.2718187466182	16.3893878162643	17.3094580283664	16.5398682008351	16.61460123093	16.5520801512587	16.3610547380482	16.8345403582325	16.9635577908671	17.6728178523598	17.4936187582698	16.8855438300994
X1.56_499.6579m.z	16.6884836681072	17.4692886866379	16.6843276943101	16.3158021601366	16.1407471940418	16.3281556728747	16.634564892791	16.5567118568352	16.2334448118527	16.7149948530636	16.7938114748143	17.0471470289152	17.2769760295484	16.7145688784312	16.8655937939313	16.6961054481389	16.2099844776484	16.7299652834507	16.1530262057601	16.4508843990644	16.3583852477136	16.8546397535836	16.8329431374026	16.0591887091798	16.8148792054	17.4014165533025	16.4923821466331	16.2720789853567	16.3749600214891	16.0539566521851	16.1730493247834	17.1024001973305	16.3071605843208	16.3717618007771	16.2943000414569	16.1572356329141	16.6329546985226	16.7350037646691	17.4554741690185	17.3193270162913	16.7146206736923
X1.56_500.3235m.z	16.3990325597532	17.1255774881742	16.4301857011773	16.04995166505	15.863323543725	16.0897178676781	16.3959838308927	16.2931005985182	16.0151292336696	16.4501906604457	16.519999924635	16.7901045329872	17.0726290872244	16.4770781520441	16.6197677311738	16.4862774166995	15.9547968873752	16.4695774636976	15.863764598361	16.1477225699619	16.1015571834243	16.5322730804828	16.5651602236546	15.817226308273	16.5155422054656	17.1437191243074	16.2250165396405	16.0004639320688	16.1165511888585	15.7787242951626	15.8957337248676	16.8790445959845	16.0957938522861	16.1400988181337	16.0169939029047	15.9313726828171	16.3894325554752	16.4947048501823	17.1620642466164	17.040406573135	16.4237238447174
X1.56_496.3295m.z	14.6064361341279	15.3821814589861	14.7424764974173	14.3248535231268	14.132198409938	14.2966591113098	14.6277212583073	14.5067445095831	14.2873300625196	14.6834603779364	14.7580098842774	15.0266228065547	15.2169877801683	14.6687342294729	14.8799938348358	14.6724433530514	14.1882713635522	14.683398294505	14.1449108226057	14.4435134897614	14.4191553356818	14.8367729469554	14.7134418386603	14.0533226394101	14.746774884675	15.3525816683558	14.4263554483042	14.248045468909	14.3790362547233	13.9531701918583	14.1816152793225	14.9773063944613	14.3578069162049	14.4315068519632	14.3987172838993	14.1963234884301	14.6098800142435	14.7638984772244	15.2845733281336	15.2959673905597	14.7016498940171
X1.56_833.3493m.z	11.4509196992728	11.7033862333934	10.9422559028143	11.2123911457997	10.2657694799635	11.6269089291268	11.7317326303349	10.795797202395	11.498961206448	11.4077893318721	11.7773854568836	11.844273132196	12.5490789700872	11.6554258707084	12.0587767658011	11.9578307625251	11.3617033580967	11.8780273649874	11.7142408377508	10.9740794259503	11.0976193426323	11.6993794109853	11.8482535914361	11.0480299104869	11.6143733102542	11.9495744261159	11.6235179486192	10.7690997251028	11.5822390388629	10.8929243740084	11.2979946142584	12.2336260167106	11.1428040934755	11.3629761030082	11.4600908827269	10.6736492095175	11.5990042272488	11.8135376979462	11.164406896089	12.0443483930403	12.1566275315643
X1.60_837.7577m.z	15.5213390283168	15.9769627055023	15.4826908632032	15.7960092767107	14.7915234155096	15.4230746108741	15.9641806673475	15.9112080857512	15.3860588716385	16.3199283189823	16.0789562553448	16.2159498201645	16.8031887047272	16.0482756075002	16.4897033700236	16.2942484054696	15.5204077360056	16.0804576480858	15.7164613215987	15.531717023244	15.6123937854646	15.9141630033629	16.5583910714864	15.1358167784716	15.9616117890118	17.0563224132569	15.3229695184772	15.2591637291645	15.77346764051	14.9829849916788	15.4976069282847	16.814217725988	15.4876475580263	15.790182503173	16.0047097232913	15.1624420120903	15.8008065543624	16.4876025611669	16.3641367669164	16.8089089194606	16.3159547086905
X1.60_938.2703m.z	13.9555209057123	13.6799382406034	13.5763203509024	12.8053839996852	13.1101909086374	13.2715010860421	12.344654531511	13.5521771829875	12.1404625785215	12.1924330063379	13.4415011631112	12.7280010178016	12.9062962159806	12.6390086723551	12.2939878352704	12.2732386276784	12.3318967229304	13.1686887596526	11.4624538791755	13.3090369017566	12.597590556816	12.7608992176198	12.2052933162273	13.2178761302442	13.5258694630561	12.7608702260116	13.7399397847706	13.469629406664	12.3138742996734	13.314942628852	13.1863059921256	12.5541108471972	12.3948303783568	12.5132891809035	11.4949121655945	13.7630793012565	13.6980488451483	12.8603676551475	14.3161339847044	12.6801861807608	12.1696373232579
X1.60_941.2672m.z	11.7602404485981	11.2918949599625	11.123853038864	11.7261669347528	11.7648239275406	11.4744949694635	11.8837135674153	12.0608108052826	11.3553011898203	11.984926318452	12.0120189818702	12.2562857226216	11.8288658672695	12.0019532043043	12.3886331353308	12.5257833082032	10.9642305337903	11.5568099701778	11.6308618686141	11.4421600279699	11.3818992453117	11.7807682006764	12.4415311475731	10.498358084608	11.6843963125718	12.9056546187168	11.9122975667313	11.2751755499967	11.2715557321667	11.1321611319683	11.5011193550556	12.478137761279	11.4042041869721	11.5903274305484	11.8872384215588	11.5215667757651	11.714139799847	12.0453638306214	12.3059253733826	12.4976123537553	11.6272475910949
X1.61_837.2586m.z	15.782253504369	16.067836590286	15.8010977058887	15.9712847599218	15.2226563807569	15.747591674964	16.2656505753638	16.0960082200664	15.5960052967659	16.5290607057009	16.2832373269748	16.5598904480271	17.1020421602762	16.2797996981948	16.7385324927297	16.6283470100801	15.6404826979838	16.494900730202	16.0165634947282	15.747699685256	15.8354746669439	16.2726993731291	16.8580165399006	15.3195193311617	16.3393649771668	17.3882893477616	15.5978044862791	15.4534809286328	15.9658069147577	15.1307636404623	15.6852335628954	17.0234493870357	15.8331219303274	15.8687433032047	16.1765545728208	15.3628826433477	16.146011232668	16.7651670679515	16.5978300914575	17.1267736238675	16.5512394617551
X1.62_944.2628m.z	16.7400921415394	17.0670843599609	16.6668201119626	16.8008673416265	16.0151426954672	16.6599353416661	17.0539378490641	17.0570903213678	16.4886498125807	17.3798300505435	17.191099951319	17.3957516228498	17.99202198895	17.0826170400144	17.6082535969774	17.4635013935613	16.6942924011792	17.2909142716554	16.7237985888948	16.6937799535907	16.6533768324449	17.1164089889037	17.6843293509225	16.3393086376474	17.0658988661805	18.199974915256	16.5117017031284	16.5107662418976	16.8126597163201	16.1017440020022	16.4979197175998	17.9027709763831	16.7361385622539	16.8672091108388	17.0161667253873	16.205769803691	16.9373609487162	17.6310558411304	17.5621466517803	17.9837854712712	17.440334909673
X1.62_1074.2714m.z	11.6477164118439	10.9143578904949	10.281799220596	9.78294462899619	10.9780079294847	11.4863920478923	10.4616196647461	11.6305272403917	10.4233195211241	11.0902972627089	10.6620387385175	10.4341131374437	11.657129520073	10.6127701346753	11.3203831986157	11.2291042570945	11.4255321212411	11.2048946074132	10.8654786187013	11.64452424291	10.798408307257	11.0494457917933	11.6091506216018	10.5889133632018	11.7273722056594	11.8489905284429	12.2544202871605	10.9791296412195	10.9100422031279	10.375443789401	11.0879719267695	11.9502318129505	11.2538351801807	10.1293613777063	10.4085833662787	11.4072844265384	11.4051609020531	11.6925502305973	11.6417018067447	11.3556097634573	11.4180234445527
X1.64_917.7612m.z	13.2267357743802	13.8419171152916	13.4479072771615	13.8417946119429	12.6494456501499	13.6406292858147	13.5795640827084	13.7801876447481	13.5370110642014	14.2761154854226	13.9727882407873	14.0913004907433	14.6928248347842	13.6604374403024	14.4525360334739	14.1445191733906	13.8159261747908	13.9834125046492	14.0172315839042	13.6709405981748	13.5072718295778	13.6959693964862	14.5113938305773	13.2491235752691	13.7942764402182	14.8449047989107	13.6267409505815	13.3502167618704	13.8632498490243	12.9745512282986	13.351263194837	14.7510873456838	13.7774364453673	13.6818914978072	14.0361653028338	13.2741109735066	13.5781705937041	14.6013360674666	14.4159278314716	14.6817804450886	14.1241579083279
X1.64_843.5171m.z	13.9632867524887	13.224204727656	13.2570154251432	13.0047133020528	13.31241971247	13.2299677298245	12.2751296029594	13.5993993594884	11.7115287850113	11.5724427264724	13.3266600319603	12.5488930481507	12.382610684684	12.3111058379113	12.8317904907289	12.0432366944104	12.7380500826924	12.9572464170951	11.1607483282611	12.9659369075029	12.2090695708479	12.7502236649466	12.1757865541405	12.7959170339106	13.4580204037228	12.2801210266442	14.0177291153311	13.5928661559877	11.8229650546788	13.5064722128038	12.9175847182838	12.4745826820959	12.1460920985298	12.0638643704205	11.334237087902	13.9082599861567	13.3830856952486	12.4817888005629	14.1021980170441	12.8799599603837	11.5210859762741
X1.67_844.5157m.z	15.7113851821217	15.3653452229777	15.1226754802558	14.7001648700822	15.0703375727488	15.12926430622	14.3432179412636	15.3677208112299	13.7766200966328	14.0378236181266	15.2257859955203	14.5623013245415	14.3073868819514	14.337127200251	14.483986407745	14.0166002873658	14.5159077894759	14.8528595230084	13.2041306958639	15.161911638806	14.3103922219909	14.4499337221405	14.229777414144	14.6036081249301	15.5227600941844	14.6632700980709	15.7605651294784	15.5092659384191	13.9735523693206	15.2125554309288	14.7437465716042	14.2423111683513	13.9321685563178	14.242671334149	13.3908266709641	15.6409290025279	15.3520702653498	14.46593289045	16.219392228861	14.8569896202355	14.2796052957415
X1.68_426.3241m.z	14.0594866850047	14.339911945519	13.9545588944997	13.9105123560695	13.4324696106575	13.8293440943281	14.1900452973452	14.1520998642683	13.8276787803493	14.3114403682607	14.2406152762209	14.4404464462523	14.7617330079764	14.1391762887097	14.447513484597	14.2575234039303	13.7157617942962	14.2017920421729	13.8028059284745	13.7891230548472	13.8167703094467	14.1239556127073	14.3813399877631	13.5419216540151	14.2582175702001	14.8391873537139	13.8777167561746	13.6691160343382	13.8773190896297	13.4479484420319	13.5988059172924	14.6618660054209	13.8309614086067	13.9038546339632	13.9765970044935	13.6094496664394	14.092693111422	14.3210742178942	14.5461056460014	14.7946327425532	14.2213297589039
X1.68_677.6664m.z	14.6451092736414	14.8067991053567	14.4583150784973	14.4128102972614	14.1447208095035	14.5093377222105	14.7295988605881	14.8173804398182	14.4295196549783	14.8573719253217	14.9483290398319	15.0245817870327	15.5823238602233	14.7846655618541	15.3961929602123	15.1214481591949	14.4073619828082	15.0643426002343	14.3990354887961	14.4377743207413	14.4399074168321	14.7920426055432	15.2701118675299	14.176712861957	14.8300523653985	15.7239135643218	14.5214108609893	14.3197431748367	14.5412083484575	14.141595715372	14.3735362222335	15.4034488824839	14.4276812917041	14.4685180490137	14.6972410827197	14.2350920630077	14.6461589628809	15.2210762735338	15.1920122308729	15.3863105741014	15.1409283923879
X1.68_409.3220m.z	12.2089964817114	12.314535828252	12.0578650428261	12.2624899195085	11.8198750615211	11.8278010818014	12.2648017603225	12.3574012536434	11.9807868320659	12.5299126239771	12.6349255351485	12.7478821149006	13.0000610076778	12.2099571575461	12.6354293163025	12.5425042317448	11.9269157102053	12.5321747068102	12.0881823409988	12.0734914242935	12.0561748838642	12.2169250045714	12.8067238430862	11.7566350846161	12.4828698649853	12.9857267323563	11.9285043783486	12.0771067554738	12.0977936348128	11.5903720734819	11.9598192933513	12.6679575770806	12.111312553104	12.156965461043	12.2427953323205	11.5738480373367	12.2524457993515	12.4941506653876	12.4335477309947	12.8676976874152	12.4331535892748
X1.68_890.7605m.z	13.4799346982784	13.4692700728193	13.2418171946447	13.9345057840221	12.6036854220599	13.7791899765359	13.9148867886445	14.1079073472096	13.4820481580323	14.2464599578052	14.029714655676	14.4591560115578	14.7139773031934	13.9569856664113	14.7583530914826	14.6416419685476	13.3342991980453	14.1879171369082	13.73023972412	13.4235922297102	13.741068104528	14.1205846160386	14.9464115202682	13.0946416224637	14.0262578180489	15.076750705343	13.285892436885	13.3443964233841	13.6233427379823	12.8930305538114	13.4314910963074	14.7367991017336	13.782256148494	13.5176335257478	14.1646738354839	12.9096087104927	13.8999833229864	14.4974838059494	14.2939043118905	14.8012263309286	14.3032475382191
X1.68_1178.7783m.z	13.9195073883642	12.976546781995	12.9568945379082	12.6891060029722	11.9656060367516	13.1165404804534	12.4022284493037	13.5515444778563	11.6434986205759	12.5137024234953	13.1660091572974	12.4624114553467	12.3263166331725	12.3649085212707	12.6846717537912	12.3458024761372	12.4561868940308	12.8564637731064	11.3329429500767	13.0955450955599	12.7025765145603	12.6658518448627	11.7706096193462	12.104083410965	13.1842215025662	12.6755349156886	13.8125285713473	13.2334165996841	12.0169318766	12.6640151313294	13.2004587026049	12.4029605068702	12.1044961708801	11.8341861807811	12.2257188512188	13.4111202060715	13.4390311218149	13.163284273314	13.8884908597156	13.3146002977164	12.6261255248141
X1.69_837.3418m.z	17.6088591641006	18.1122909009711	17.5894902630551	17.4780146513119	16.9995219299521	17.4178563400514	17.7491028600521	17.8045507217031	17.270867627767	17.9569978272236	17.8871616708136	18.1759438991527	18.5761720024584	17.8593617731579	18.2181709213113	18.0905483922133	17.2687105047622	17.9929919021706	17.3500554802927	17.3997134694628	17.3976512109447	17.8463820297449	18.1994267272972	17.1544400403922	17.8714530752906	18.7942330811865	17.4927114979576	17.3265274006666	17.4878330928374	16.9389293130622	17.2088900256708	18.411514738278	17.4023169974848	17.4831517343794	17.6072801420703	17.1846529050929	17.7498682096376	18.1398161191194	18.4800024555071	18.4840612851765	17.9363500884909
X1.69_693.3374m.z	16.6613451317619	16.85125678681	16.5714878514015	16.5763470682889	16.0279482542991	16.4435783096803	16.8317965559365	16.9427453458314	16.3904403816612	17.0411569628563	16.9806796250842	17.1933270488752	17.6085273409683	16.9684742646358	17.263033948174	17.1806241805663	16.367846162496	17.0436218301818	16.4410840901803	16.5019209117051	16.4450931609051	16.8208218662303	17.2899712427725	16.2017423999866	16.9469790041285	17.7950871111619	16.5864144014699	16.334301115235	16.5755345679297	16.1514803293123	16.3418425044526	17.4765483345338	16.4411549144868	16.5875903630809	16.7275146734887	16.3327769750245	16.7820409038792	17.1865679094236	17.397687892417	17.6139241383544	16.9858678474182
X1.69_837.5084m.z	17.7642155060679	18.1844308802026	17.7710527713291	17.8846122882401	17.042208529186	17.6550378077826	18.1697928961563	18.15384741464	17.6335107374377	18.4600941847277	18.2211544463518	18.4684252657526	19.1070792659116	18.2135692378802	18.7026329149124	18.6582837466759	17.5622225067455	18.3832160861307	17.8476552648411	17.6650042587095	17.7513947110155	18.2436921997136	18.7984623098437	17.2702116901316	18.2216639307668	19.3390082891067	17.6705233042818	17.3896768007877	17.8837339488534	17.1239189433359	17.4895767305148	18.9668821977577	17.7682360450311	17.8744153084071	18.1248132074101	17.3624810996226	18.0032343843857	18.6496973800399	18.6703056637204	19.0444545746076	18.4135192041883
X1.69_692.0061m.z	15.1547569317669	15.1856978820734	14.9545979527806	15.026874637331	14.4536451261911	14.9217948123749	15.2949915017594	15.3901313574097	14.8666465370203	15.5565486224677	15.4085895855438	15.6512192226363	16.0485764275338	15.427070904788	15.7664640982735	15.6862036402439	14.9610331434086	15.4740513106655	14.9484116781919	15.0199750793102	15.0448427402597	15.3192747621605	15.7771702000808	14.6701777399883	15.2285896061425	16.201008554742	15.0311870114539	14.8849652763909	15.1477886019956	14.5222428254937	14.7425418850688	15.9004278290973	14.9740129061859	15.1475028031346	15.2362797893204	14.710540732412	15.201841066945	15.7669643856704	15.7745842949452	15.9888517724015	15.5047461160963
X1.71_354.9871m.z	16.5487890717326	17.0316188822727	16.4626927641133	16.3184272056154	16.0128293776547	16.2425588599955	16.5296394607169	16.6037802436739	16.1393841734694	16.6498658385886	16.6673603639359	17.0159831787086	17.1465650604333	16.700198776087	16.7778865314512	16.6803391253871	16.165889605212	16.7141306428371	16.0694939368987	16.2548154531912	16.2458176972157	16.6274997322269	16.7725636600445	16.0215490512979	16.7596560438483	17.2739394273452	16.4749192488932	16.2408039889583	16.2255589028665	15.9428779814876	16.1417683795289	17.0559556160543	16.1916296260488	16.3379092693719	16.2519329454326	16.127786910589	16.5902451191063	16.6287485809075	17.2262057688426	17.1280446224401	16.5404838149706
X1.71_445.3230m.z	14.4092857835941	14.4881977088056	14.3823193118518	14.4506649940255	13.8126602840491	14.2853329224241	14.6261808866288	14.6729393981382	14.2283728440523	14.9030766701562	14.7415045623602	14.9232049204565	15.4189287684809	14.6674963419877	15.0915544317817	15.0285430649173	14.240153506253	14.6804565806274	14.4122325506115	14.2653560652267	14.3153182761624	14.6789811992405	15.1232225523261	14.0861485347247	14.7773853421583	15.520871309729	14.3965280401084	14.2167128408146	14.2895609609763	13.8798379966371	14.1859028618127	15.3290423175236	14.3030463109651	14.409465534204	14.5186370236327	13.9056904831257	14.6333459628043	14.9694004455711	15.1104879255706	15.3124974323282	14.9019525454213
X1.71_445.9887m.z	14.073299660804	14.2072358220778	13.9421208159591	14.1000472461555	13.6083022018168	13.9543976147382	14.3132207457971	14.3548299010267	13.887233083171	14.5237396472545	14.3333465577671	14.6179188949603	14.8884009579244	14.2737917891666	14.6989338604347	14.6753261270617	13.8410221047868	14.3546706047392	13.9727696950455	13.906312697822	14.0192125537804	14.1855828625936	14.6335711618505	13.6903640520211	14.3908252070973	15.1395467878819	14.0319416489768	13.8937063039149	14.0140146584886	13.7005901143222	13.7854791964235	14.8566267556127	13.8772141762972	14.1193562750832	14.260463261375	13.7053963623109	14.2106271751844	14.6368072109183	14.605663730165	14.8699552244124	14.3958518329653
X1.71_1064.5198m.z	14.6025709379867	14.6444695315262	14.5424870320254	14.8404266888042	13.9734348824667	14.4254331615995	14.8089532956459	15.1512588959641	14.4264104870571	15.2197330241262	15.0469604116652	15.1529125455471	15.8325310972493	14.922115558787	15.5209626704906	15.4975857271325	14.3362285704284	15.3183620955779	14.7197733628119	14.7408983279421	14.4905807850439	14.9607600645984	15.6519528056326	14.1402355990234	15.1085831795917	16.1460529718845	14.7630269503624	14.6401720856153	14.5653365746523	14.432344630234	14.4908937451228	15.7604435064663	14.6020375205287	14.7319711522974	14.6995584611674	14.6162359578411	14.8306987352709	15.4459148973819	15.7942653649638	15.625111227608	15.3203515397629
X1.72_692.6717m.z	16.0256101931841	16.1664938935683	15.8678078029503	15.9637153086653	15.3947600173559	15.8637409385699	16.1397158114147	16.3108853803235	15.783238562447	16.5088978857416	16.3092820969694	16.5505197268248	16.9211959110386	16.2749842664741	16.594499330479	16.5688148053963	15.8200015733804	16.3534659788793	15.8548931235891	15.7938453477993	15.8732319079347	16.2393345043943	16.6609281814476	15.6596145567503	16.2751924220389	17.1552505033019	15.9500861794501	15.7304936137632	15.9651601821974	15.4853232390692	15.6912272138325	16.8313282283013	15.8269105746094	16.035567918888	16.0466638652009	15.6818255629765	16.087109953976	16.5804046215956	16.7643077270169	16.9270037110691	16.359957588904
X1.72_463.4894m.z	9.88556306635663	9.98950677682105	10.0675531536069	10.2398434982201	9.81782437563194	10.0712361929551	10.480384832985	10.1130883638887	10.2511329760467	10.8750547649289	10.5374968781409	10.944511017967	11.3155455908389	10.6447339436476	10.4076563144725	10.7906600444108	10.0276027720592	10.6326506040785	9.96166862962943	10.3152190569218	10.1934331354808	10.7427434582997	10.8554631680694	9.58889328394201	10.6346293763729	11.3678314899145	10.1534038638813	9.57746287671263	10.1044772587944	9.8671606776955	10.3715003140319	10.6705691043427	10.3500637106999	10.1881996457158	9.91786385273696	9.71747717217362	9.80225220387535	10.7321331407952	10.5955028156339	11.1635535459369	10.4696662209396
X1.72_495.6635m.z	8.9588492393032	10.5372823885412	9.20839881911533	9.10007289869289	8.78371032349259	9.66099143155598	9.82550839516363	8.84034341081794	9.78759483793266	10.0623425509398	9.73954737375216	10.0335867674971	10.4268578132738	10.1082494941991	9.80037102388415	8.66375223305152	9.01208191855436	9.21967991970064	9.08929572014799	9.93377480892221	9.93056846342965	9.74250646477654	9.96348174284304	9.4416652263441	9.81369299000813	10.2524863928706	9.60851379240732	8.83139821270573	9.75759729928434	9.24459208292884	9.35026849149759	10.2109856659979	9.08779653918199	9.31204903801264	9.87148142845154	8.48089063807009	9.9807121540157	10.0959114644299	10.2653252880695	10.0703484188169	9.7068519977377
X1.73_694.0030m.z	17.0259477579537	17.243082041619	16.9493885832349	16.9274971782966	16.4019849132279	16.782552588834	17.1437653042927	17.2996956918583	16.7505676358846	17.4827753248221	17.3569769572462	17.570041624875	17.989382945603	17.3204124504121	17.601043133549	17.5746513862251	16.7679500514185	17.3640551429723	16.8522472372338	16.8427572154546	16.7995646718091	17.2251493169629	17.681000396236	16.6200363997204	17.3380132353533	18.1651251678284	16.9795549406308	16.7950594011752	16.9778087620304	16.5129427951058	16.7253015476017	17.8449538884665	16.7589716294456	16.9299865938346	17.1158640154301	16.6970591872273	17.1535523251218	17.5219729627715	17.7542994720431	17.9613805335864	17.3527683121817
X1.73_696.6658m.z	16.7834362925403	16.9797312788966	16.6278477055363	16.7658942337122	16.1815531280297	16.5741527237585	16.9462536444304	17.083722628308	16.5521243187403	17.2709016139699	17.1009046264838	17.2601859768646	17.7744990963483	17.0611268266091	17.3242046876389	17.3061712804049	16.4923497176824	17.1744301070632	16.5777376374334	16.6064239553864	16.5899982723993	16.9960245602426	17.4646287980893	16.3022489999029	17.0783576134621	17.9428542612135	16.7359767492166	16.4870269787923	16.7416845339754	16.2175570361873	16.4569260313761	17.6211836460505	16.5314045945969	16.7151096807443	16.8473637598119	16.4135668037661	16.8771670303913	17.2725908811121	17.5353174283016	17.6798556037638	17.1514439110144
X1.73_517.3251m.z	14.9105563824849	15.0673492224779	14.7251475997752	14.9760742497806	14.2749454053504	14.7966823724919	15.1460137136607	15.1437130405852	14.7033161120644	15.4379369319473	15.3106688135706	15.4608524599566	15.870640033696	15.1982539710793	15.6169523454275	15.5369629500183	14.7848011874411	15.3501282718528	14.861489560316	14.7914654249308	14.8238009433202	15.1469316583644	15.653300595135	14.4303531653269	15.2515561701105	16.0691928257957	14.8834386515573	14.6777750837486	14.8648030251857	14.3289309390165	14.7595224394585	15.8434825194994	14.8756241127162	14.9752224813745	15.0913865725022	14.6757449751588	15.2422972226277	15.6323946169359	15.5654159858999	15.9428869819275	15.3745996611617
X1.73_783.6729m.z	15.4046603718313	15.628865280223	15.3505089752043	15.4802694234384	14.7646505399574	15.3429663285164	15.6263380233103	15.8312174153038	15.2360839725582	16.0475695946635	15.8744202516415	15.9780643080875	16.5607511066084	15.7670252543119	16.2873744763058	16.2859090894398	15.3145291033907	15.9931887401359	15.5125527850896	15.4635023911596	15.3861159991325	15.8022131065488	16.3330743998963	15.1041510958248	15.8500499169484	16.8634149242792	15.4250170190791	15.3290193972725	15.515354446516	15.0263332378011	15.2832773940712	16.4724169785197	15.4243916138831	15.56681549379	15.6822434443498	15.2110144864415	15.6978472481785	16.270208184288	16.1957647647163	16.5277896027753	16.0008526082184
X1.73_446.6544m.z	13.5880143294316	13.803711902738	13.5716632964017	13.5938202997915	12.9258539510574	13.4917004911839	13.8206653273633	13.8885969617479	13.4039126773458	14.0178599418323	13.8503785989217	14.1346526416669	14.4777374966703	13.708667152677	14.1298694409121	14.2473631945282	13.3764039252539	13.9493408319468	13.5430100252095	13.4068098904539	13.4562193333999	13.8024548819728	14.2994732892404	13.1624106470428	13.9108697962736	14.6438345412552	13.5629732508804	13.2050621878117	13.6109977019194	12.881661630014	13.3335629185963	14.3680481824505	13.3951037197428	13.553341332864	13.6519736380549	13.1895490404904	13.7726536819504	14.1379244901799	14.2068909779972	14.5285833643856	13.998690800415
X1.73_931.0091m.z	14.8397029466567	15.2753685563247	14.715879427187	14.8637296703629	14.1899339196638	14.6967325245603	14.9985430190661	15.028069251039	14.3576726221465	15.2889401697881	15.1668520438594	15.2646155658661	15.7769253740377	15.0387946042422	15.3091013751284	15.3044828657854	14.6246198311199	15.0649201146138	14.6376775559355	14.6477439639111	14.4970389619654	15.0294941855967	15.6358358623209	14.4294812777386	15.0468173691621	15.7744847770942	14.81250374934	14.736754991744	14.6215273141704	14.1778235996449	14.3898260386893	15.7145048911016	14.4957110386138	14.7784904712346	14.8227208130973	14.3199536200123	14.9061625070317	15.5676809285107	15.5147754175472	15.6639532715544	15.1383065771733
X1.74_694.6687m.z	17.2268911273882	17.440337582406	17.1090196415367	17.1185488803557	16.5849904986395	17.0058912875205	17.3802857375028	17.4685867269949	16.9472445537932	17.6325502968024	17.505223132516	17.7340847693146	18.16657746299	17.4114567046988	17.823753789556	17.7185882459101	16.9189159906202	17.6042086387602	17.0088106580944	17.0182876892852	16.9822973883294	17.3927915554427	17.86548565063	16.745178727207	17.5637020660361	18.3795096344354	17.181312056864	16.8789203550254	17.1171857635104	16.647356443349	16.8485756027624	17.9880089790618	16.961324508374	17.1678647938814	17.2186984651459	16.8070698893127	17.360703970777	17.7128241846654	18.014880338312	18.1561103896382	17.5859326949224
X1.74_844.6881m.z	15.099537993495	15.143923136472	14.5034144814704	13.8884120643304	14.4042644562998	14.244931530561	13.915389973516	14.4517464843565	13.3762744906845	13.2656767573457	14.439982686117	14.1346887016762	14.2869104254208	13.6934640017525	13.5957848799944	13.6184896579263	13.9220726171682	14.0691380242492	12.8655405247339	14.2818353580858	13.2551382359576	13.9997907285953	13.6174192417106	14.0991266166172	14.7279640799086	14.1183507531115	15.1663991823782	14.740678027063	13.4470786832772	14.4733813657303	14.167720504522	13.7789293922656	13.687386238111	13.5861182605951	13.0584547819791	14.7896497938491	14.4660952927001	13.6750364698993	15.5257967062932	14.16340918465	13.2684744516756
X1.74_1085.0252m.z	16.0388730946101	15.6532081435278	15.4482971000237	15.3237591746358	15.2903250529051	15.5166853402638	15.2372955973471	15.880127824159	14.679787878832	14.7304751838736	15.6756352379758	15.4650175097024	15.5086623908584	15.1523861342072	15.4429680010351	15.3475769899754	14.9610989036366	15.4516467655854	14.6611502950781	15.6003478937263	14.9404272600217	15.1892616701621	15.2473591543205	15.1462165717881	15.766844390421	15.7487049835498	16.0614292731438	15.6864355629864	14.6061903232743	15.3090264001312	15.4134238157822	15.576542412902	14.6342776110287	14.9635838297867	14.7375959484799	15.8847063448291	15.6255546372029	15.4078358943546	16.5755085344643	15.6496736838978	15.0420235856654
X1.74_897.0188m.z	13.5928457730042	12.8473259254069	12.6714653107604	12.6701518726098	13.0343492873202	13.0470518247223	11.7807780494143	13.074047284276	11.5424764569953	11.7349227308149	13.0411260203966	11.8380661915201	12.4494564242515	12.0742257704167	11.8627523403344	12.0848876466522	12.2797627319717	12.8929184225874	10.7684437467053	12.9383247155397	11.9444600002383	11.8242232940351	11.7834578885612	12.0858751785658	13.2986160162862	12.8143569466383	13.7745762545071	13.0812347293281	12.1647965633395	12.9702527885719	12.5440114260988	12.2607829450456	11.9855249299644	12.1826652248573	10.383260395518	13.4619138591936	12.3437334566374	12.2212993768051	14.0532303115736	12.6405053335275	11.6922426074464
X1.75_784.3386m.z	15.5187879178828	15.6357832846164	15.388248307989	15.5883618728629	14.8688061924669	15.4304718883628	15.7794435301205	15.9280009296788	15.3137555599054	16.0756025823382	15.9201401809534	16.0637084944223	16.5758845801256	15.78388156324	16.3621195822469	16.3148678174645	15.2189014311273	16.040735708339	15.6273992017305	15.4599090491105	15.4539834558572	15.7767283341926	16.3100149911575	15.2011392620616	15.899826373214	16.7374321310486	15.5012449501005	15.3419234072366	15.5022239164623	15.0339967679459	15.2553486055329	16.4677655967816	15.3879663831093	15.4654988238569	15.7783082329519	15.2629887558201	15.8121037439097	16.3109912490577	16.3127883237694	16.549200648552	16.0975125561851
X1.75_678.3318m.z	13.4484261083595	14.0847255379007	13.3854436237348	13.5017012223589	12.5432876707911	13.584136662969	13.7208021119919	13.6593980723898	13.1893166714311	14.008122544537	13.5849471883064	14.1628795631316	14.3622572868908	13.66310549688	14.0629597212242	13.9865575209972	12.9862440777304	13.8046800159065	13.4268264732641	13.394024639362	13.2725958561909	13.6588796756963	14.2069770629602	13.0205074957859	13.6059735274558	14.568294304164	13.2975506826726	13.0995895817934	13.6090892354213	12.8162145444535	12.9733261766161	14.2615411355058	13.2498892109578	13.2891125338331	13.6206873672431	13.271591854928	13.3780068275344	14.2736468148743	13.9692417683934	14.4343622779006	14.0506378156059
X1.75_923.0174m.z	13.4931644294927	13.783395978671	13.5369622108132	13.5019217723982	12.7254549620728	13.5616855413337	13.6926570407273	13.7990681205055	12.8106665731199	13.2127983567138	13.6027885325117	13.7553350893249	14.3302278633658	13.6163863144629	13.7610298761385	13.8879569281641	13.1823814729956	13.709859329403	13.153459504996	13.1743068919663	13.0786361035989	13.4825453771762	13.9744632916998	13.0863211089445	13.6542897491689	14.6202079655668	13.5707809392372	13.633035594275	13.3318100164659	13.1100850195007	13.1441882162505	14.077380336683	13.1343803319882	13.2717272425317	13.5313298661422	13.6841025531528	13.5566241709757	14.2642050170835	14.0672792377873	14.1624315906305	13.5570650158658
X1.78_834.6798m.z	16.0316310372578	16.5648089441451	15.9025937202514	15.8918387016062	15.2496621217258	15.7827811189438	16.1872009784139	16.0712692747841	15.7693120748585	16.3049083506201	16.2592384268652	16.4690061678372	16.9150234948866	16.225855645137	16.5464875161825	16.5010921614281	15.689514783964	16.2731471757692	15.8350690934244	15.7908787138545	15.7398034604227	16.1935482886267	16.6188310731746	15.5320978944528	16.1688602060867	17.0794510330345	15.7808775506519	15.6989278856582	15.8702523979109	15.2498154785527	15.5882913586436	16.7122347172738	15.7598848762088	15.9564849445841	15.9561430286763	15.6130833015959	16.0462478003808	16.5425629389919	16.7824821500487	16.770867662683	16.3235512572293
X1.78_1017.3475m.z	15.8647852153966	15.9747450628204	15.57320591463	15.8988625629605	15.0505902744322	15.7237945410132	15.9671765528237	16.1137244099329	15.5749507503809	16.3458395696672	16.2006797261035	16.3522856128529	16.8551956512988	16.2260058459781	16.6394064225613	16.5304120788389	15.5905699436468	16.2297155256477	15.714153342772	15.756118943267	15.7506075262938	15.9078273754761	16.7288026753028	15.3296856420781	16.1781411418054	17.2981985352902	15.6543904928279	15.4018116408479	15.7120330992383	15.1099848834296	15.4991549324178	16.757087873838	15.6524781401813	15.7765290958135	16.0102470091462	15.3533924464128	16.0094993768126	16.6510544984092	16.4067306948703	16.7774165929139	16.3980196802266
X1.78_513.9968m.z	14.5565217289465	14.8023225701562	14.4797284309122	14.6554079757516	14.0513980784865	14.3530822757116	14.6837598759366	14.8027833973872	14.3968206241566	14.9641589096101	14.9327160373678	15.0061684269712	15.3833875546025	14.8133679223547	15.1142760514563	15.0681827157199	14.4161233317081	14.9449132573453	14.4786004086239	14.5015227521205	14.5155066346637	14.7363297219191	15.1664451853394	14.2648040782286	14.8202252427748	15.5816073987159	14.6143507001032	14.3847590731563	14.5677131814036	14.0087488179516	14.2224941029186	15.3500859571235	14.4728304804472	14.5522358266433	14.540672111977	14.2433339785465	14.8276206255164	14.990652843081	15.1512552917638	15.4103040739409	14.8962930211466
X1.78_676.3350m.z	14.4998947770567	14.7455323188931	14.4357694588983	14.3378975697964	13.7874502992048	14.2474575083123	14.5409055293207	14.8522927700059	14.2448401668099	14.8609881630186	14.8319550894277	14.9801233988023	15.3622748241354	14.8077339538199	15.1863794355452	14.8513010937979	14.1898212508096	14.8906771298342	14.358246819224	14.2423040433361	14.3320725935164	14.5939553027022	15.0670677032876	14.0180552543018	14.755064785168	15.649683130844	14.3307747092887	14.2670896769207	14.3371184193646	13.9578366592885	14.3303681889734	15.2403358831038	14.4524948820912	14.3779135615959	14.5439318316882	14.1485500919444	14.566752605838	15.0846208497666	14.9792791656315	15.3795299718267	14.8046233210877
X1.78_359.9798m.z	12.4125858626641	12.8121664382705	12.5083405733185	12.3444379363348	12.0204259890919	12.3326034154176	12.481593087467	12.5080920212184	12.3769285016343	12.7531259808668	12.6158098057424	12.9899746197412	13.1422144497629	12.6902258168266	12.8807085810024	12.7177514095269	12.2880195462771	12.8244698654653	12.26354597431	12.3416462792663	12.3220311059502	12.6678664035774	12.789016409248	11.9849528410308	12.5908047155142	13.1362056327735	12.4055155555495	12.0104815954297	12.4211266455627	11.9657119005077	12.303411696964	13.116991933211	12.3743328830717	12.327441377309	12.4670567971869	12.2037926578368	12.5852844391439	12.7005554496859	12.9775893281349	13.0401617453208	12.6154904098003
X1.78_992.0210m.z	15.2996027729154	15.0379139110651	14.630353097802	14.2851009508411	14.8637460796779	14.9385934253921	14.1048192584929	14.9901021183118	13.7153218674525	13.8380778531263	14.9650839224444	14.5977817451823	14.3627849327672	14.1830891162196	14.5257034499274	14.1643608934915	14.2939172879145	14.7025066746523	13.3540002015333	14.7938947691005	13.8422590243458	14.3501450441236	14.3365498814592	14.5944833112506	15.1473043982203	15.0895064107915	15.625842349373	15.0988606095074	13.7790295689029	14.9012770381887	14.6399631285418	14.5538311273799	14.0450266384869	14.0614367232025	13.7412668634056	15.0557507810597	14.9683465894733	14.7711040790086	16.1161918331226	14.8336027845972	14.0709232045921
X1.78_1012.0185m.z	14.243163647573	14.499502045186	14.4063660795462	14.6184406586584	13.6972690236966	14.5506797505327	14.7434025857625	14.9953626677819	14.2067910861139	15.1625099005366	14.8987218520553	14.8608964676565	15.7398526967694	14.5890593614708	15.5128409104993	15.2990519790887	14.3432072439509	15.1089129232779	14.5160657121374	14.7201683640928	14.3693922914076	14.7855288688299	15.592827040206	13.8944117055049	14.8421082973825	15.9100865572765	14.5103039312207	13.8938233549518	14.2153371189657	13.4936986888984	14.468276240001	15.5627850749052	14.4635981612268	14.6813819833928	14.7974665834765	14.0362987866546	14.6651612902307	15.4132800863345	15.1055494417068	15.4478733694453	15.0919161775579
X1.78_1084.0264m.z	13.8258510624619	13.2242402377495	13.5681548732832	13.1252220076981	13.0516724764863	13.1385663391422	12.9305077213733	13.5200312609474	12.485995357542	12.7717558692548	13.7454659916847	13.106914970071	12.8497777804795	12.7358715692843	13.2757385122878	12.8822414914621	12.482138372181	12.9776686727066	12.0184032122282	12.8928973013965	12.1981386724621	12.7080714526998	13.0555701634873	13.1534877384679	13.8112282592058	13.9930415128213	13.8574221010185	13.9027374892365	12.4443032003359	13.1873592688156	13.256520211538	12.982325676108	12.8511756576466	12.6091188912204	12.2267454512156	13.2098145527433	13.338851822378	13.0299042079454	14.4688737645924	13.6671549541946	13.1368381735151
X1.79_978.0179m.z	16.8212876786314	16.9804688587589	16.6756749071211	16.7323218106535	16.0205298457397	16.6332498104749	16.9530341151321	17.1894148198944	16.506558470143	17.3020205484702	17.2031246106319	17.4786109504401	17.9071185570317	17.1502754795253	17.6059342538995	17.4716030819485	16.5605347287297	17.2616513342829	16.7240785754809	16.6888952291533	16.5926934167903	17.0923307837772	17.6415230601543	16.3563588024888	17.1395453926024	18.1473083766638	16.7252534287767	16.5105104988719	16.7306655860555	16.1183806516888	16.5304931808089	17.7787228314974	16.6576541077467	16.815789313691	16.9922453112417	16.4315886665322	17.0452410081944	17.4983551146955	17.6395590432013	17.7769800894943	17.2910390128195
X1.79_551.9953m.z	15.1125764404945	14.952788909208	14.8683248115699	15.0867932416141	14.3587924005652	14.9342177338273	15.358938614336	15.5048568504464	14.9376317582036	15.7135873978027	15.3910599067107	15.522238030836	16.1470446886026	15.3880700093532	15.8950680089197	15.8633227838606	14.8584447192923	15.5877588925589	15.0167585173985	15.0300739692469	14.9898994197983	15.3315664562507	15.9370165835294	14.5630112941566	15.4708093878661	16.4007797114495	15.0210319259332	14.8556864791246	15.0274542015656	14.502447283779	14.8631413501591	16.0395058289628	14.9859510436266	15.0037219402615	15.3583246904033	14.8558572760918	15.3337231795771	15.8653484418272	15.7742591412756	16.0720305325337	15.6047611436618
X1.79_551.3296m.z	14.8493384100531	14.762361840143	14.7002760448829	14.9081235804359	14.1344519860799	14.7199855936679	15.0164482697661	15.2195660545776	14.614002930833	15.4241609625982	15.2607640175881	15.4010335300933	15.9254425111433	15.2014843573311	15.6388618751076	15.6182135025198	14.6720062119046	15.3190246429335	14.8719695730354	14.7274542108583	14.7715309834512	15.0246332932461	15.6321559047603	14.4291561716365	15.2840121016033	16.2138719652571	14.7622572579242	14.5139215756818	14.8349811166329	14.2303198170081	14.687818262649	15.8161603884863	14.8118773083267	14.8696264905261	15.0288905337057	14.5978640402988	15.1743845250729	15.6217411581579	15.3538098381086	15.8707900500342	15.4063051425721
X1.79_783.0072m.z	15.770886704153	15.9022589122218	15.6217472285109	15.8078783386203	15.2252386679996	15.7077514649514	16.000178116922	16.2251804100316	15.5973233486134	16.3802680760879	16.1398039311915	16.3701396013144	16.9826661248794	16.1504796074361	16.657314301023	16.5456544309415	15.6298085602504	16.2807520413059	15.8220252282642	15.7099900144292	15.6611598147384	16.0712605604903	16.6223420596024	15.511754283298	16.2590524060299	17.1594657277921	15.791584997104	15.475423322125	15.8655781429528	15.1657683150238	15.5792250679505	16.8106785893322	15.7234564003467	15.801824251107	15.9996531392903	15.637163626619	15.99833817745	16.5452339730034	16.6267735724708	16.8035923050828	16.4045039668634
X1.79_1014.6848m.z	15.8759633828527	15.9437923120758	15.7886431530955	15.926056716272	15.1665007534427	15.9445777604357	16.1926137739427	16.353749061282	15.7393293857739	16.5161491443095	16.4793011069822	16.4071801636176	17.0562694333206	16.2852766236881	16.7892495141255	16.751612333366	15.8145977372139	16.48713668215	15.7797922302346	15.8705406308679	15.8644038315388	16.2811383873074	16.8896241607587	15.5801410602006	16.3537238994952	17.3975096476336	15.7756756386438	15.632696325764	15.844403486655	15.1995219577376	15.6872611663672	16.9918776179034	15.9538971006272	15.9845981403883	16.1304969752131	15.6199614661659	16.2732499940623	16.738971571044	16.703015982864	16.9438945992637	16.6072712147109
X1.79_553.9921m.z	14.4839703449111	14.3161679116716	14.2049733077479	14.5672550047236	13.7631737732014	14.4084992848651	14.6513784988282	14.8370135987182	14.269334389763	15.0376752905788	14.7879896885265	14.9343994307371	15.5015449111204	14.764522656362	15.1686803064222	15.1652430485004	14.2578664971992	14.967382326437	14.5561321015998	14.2775196280902	14.3855090357526	14.7186253247653	15.3738560270851	14.0726810586213	14.840176908022	15.794720619857	14.3380993599829	14.2441024953085	14.5040839452972	13.8948266113286	14.2894780902415	15.4584364089346	14.4402776495226	14.4588488501983	14.6177978806662	14.1107849010366	14.8294653012659	15.203761096763	14.9698180499331	15.403670911654	15.0797460538333
X1.79_550.6640m.z	14.2436560705814	14.1659206051109	14.0085201425159	14.3871072537194	13.5324162965963	14.1831209862279	14.5566304525368	14.6897015159567	14.1118658041043	14.8760717699082	14.6750150078122	14.7566775854341	15.3102310670027	14.5048425144719	15.0997682499286	15.0585024590839	14.0869362073109	14.7606103108172	14.3594909549208	14.2439488601741	14.3229148550033	14.5334159192787	15.1032933726447	13.7213003392425	14.6281938064528	15.5460149287391	14.2109168390438	13.8547822609618	14.2782849185905	13.6941994803627	14.1722745494202	15.3632498156856	14.2297596937157	14.2703335143046	14.6364858021007	13.9637491797809	14.6737492080522	15.0270276637436	14.8045959131015	15.3234321196891	14.9960246134817
X1.79_658.6675m.z	14.6974630789312	14.8215689939334	14.4338356014255	14.7256765593767	14.0919680012447	14.6284531007666	14.8208190135856	14.9973813538894	14.4242734290516	15.2149363914984	15.0160299270391	15.0577316936828	15.6487735553341	14.8361283007778	15.4066948285867	15.3827214099036	14.6555684368805	15.1183288078968	14.5939741742273	14.6056818275459	14.4306633781306	14.7977224700108	15.4474336523355	14.240183110943	15.0107361259059	15.969180813609	14.5948087129758	14.3361781199913	14.7277643914349	14.2825052110031	14.4115436687634	15.6071500834912	14.5024943644609	14.5841572401731	14.7473672608544	14.3222460428664	14.8082573853508	15.4095493860821	15.3101151305008	15.5843797127802	15.2368388231836
X1.79_659.9989m.z	14.4976587466641	14.8216200125557	14.5157034862931	14.5816111387128	13.9463955900403	14.5632987009919	14.7485974836175	14.9643989029371	14.3952905503216	15.1783466232294	14.9809363510133	14.9404960295827	15.6463616883076	14.8303118910348	15.4262313430583	15.2559962954164	14.5254317884125	15.065795924624	14.5530614033865	14.5394017123772	14.481825316847	14.846751686288	15.4430263920818	14.2321880227775	14.9356123554651	15.8999150232064	14.5214857822672	14.4452669214175	14.6305684905049	14.150982969969	14.3855667178086	15.5931928599437	14.5524530143144	14.5468371835949	14.8337967231266	14.3366237054541	14.8561328218408	15.3517206075409	15.2521162211582	15.423001018376	15.2791529346403
X1.79_786.3356m.z	14.7875800623851	14.6649832877319	14.4854024465117	14.7528191817108	13.9041168193974	14.5203707408444	14.8290143980507	15.099606952193	14.346015550009	15.0953575483777	15.0337805091232	15.0191268517121	15.7638035012203	14.8638958608085	15.4674574792421	15.3827256117441	14.3473498936245	15.1963407667705	14.7159635566774	14.6446723184294	14.5031822882367	14.9478091138931	15.5032559618161	14.1457716812204	15.0436095004012	15.9558773251939	14.5975242814998	14.4971736384485	14.5672074286366	14.0716359492691	14.3993079883737	15.6158764294974	14.568074959537	14.5416721047198	14.9075103144636	14.4433188797983	14.9002383405402	15.4438729730759	15.3954731606473	15.6135989195059	15.2897545679644
X1.79_640.9995m.z	14.2967898722119	14.4476197162718	14.2424728506864	14.4744727806574	13.7746745173945	14.2202065303792	14.5998913883095	14.8059846554034	14.2376693729717	14.9073041739548	14.7535839700775	14.8886696107686	15.4675288057533	14.5519754106283	15.0020275599214	14.9618995659444	14.2442820424728	14.7332022146341	14.41343543506	14.3787708450218	14.2243892392759	14.622136277829	15.1403658170134	13.937587922937	14.7390307453476	15.6073579049656	14.3713410707149	14.0035641943234	14.3695519563654	13.8968631821162	14.2112113640813	15.2761112917399	14.345333931959	14.3491846373368	14.5338767668792	14.1523171721378	14.5886735594597	15.2018175575711	14.9683781886749	15.2473528452325	14.9348970138584
X1.79_658.0021m.z	14.196316601807	14.4014772767512	14.2677724558973	14.2343288794454	13.4364673085746	14.1235836411745	14.5765073537745	14.6356065709981	14.1017293865831	14.9071364761581	14.5515620743722	14.6794704730107	15.2361013052386	14.4879796231795	14.927085454645	15.0121760007537	14.0160931962784	14.6791783067628	14.0374199376641	14.105692518904	14.193007258845	14.5027378389694	15.1020921205934	13.9840576844429	14.5738799917391	15.5656980901135	14.2236538126231	14.0314411279296	14.1506901455826	13.7581125489937	13.9910794675468	15.3311428710885	14.2072520251995	14.2951255259941	14.4485996805403	13.8362487488022	14.5005904333394	15.0523900243679	14.8969932669189	15.2498780667136	14.9475354959702
X1.79_481.9898m.z	13.6835385612204	14.0472864349577	13.5470474256303	13.7402964292926	13.0803574801817	13.711159196403	13.9852527591545	14.182074399865	13.4895159323978	14.3310061849967	14.0137919597473	14.2446416321797	14.7639992752446	14.1230850959885	14.4608510623668	14.442921129806	13.6520812992048	14.0829264789589	13.7546678554367	13.6072793134046	13.7868618765876	14.0074528542601	14.521785399912	13.3884959185804	14.0916809503461	14.8928844084733	13.6781254139827	13.6275088496837	13.748381300464	13.1801437319286	13.7097161167298	14.6186030713881	13.7944613164049	13.6765562538179	13.9999196200074	13.3922179161244	13.9679891253155	14.4703341011553	14.4384255749652	14.6697421546746	14.2105463506344
X1.79_1051.7658m.z	14.0769107279007	14.3009302743372	13.8925710431169	14.4728670460168	13.4336762932496	14.0759823045441	14.3070470494123	14.620431413983	13.7277720200262	14.5583759879364	14.663026576793	14.4604690081403	15.2050523477899	14.2141603713459	15.0896314187497	15.1405871329422	14.118131183628	14.4210880092169	14.15312235989	14.0736182703446	14.1919932163224	14.2937812368505	15.2438690241962	13.4795910775688	14.565090298957	15.5152954978208	13.8069528027578	13.8468657481073	14.1466880762656	13.6362693853753	14.0222528775938	15.1549148674119	14.042474279737	14.131477658064	14.405701468112	13.6618881544198	14.5382116700605	15.0436747830393	15.0168635022106	15.0600510777163	14.9473836310788
X1.80_480.6584m.z	14.0343509045048	14.2504561303925	13.9119536366887	14.1568732457092	13.3269775885229	13.8813734454746	14.2061193021991	14.3513419991942	13.7924685706491	14.4882422123353	14.3523311492882	14.4717043442704	14.9615815422754	14.4303872348098	14.7783728780924	14.7703682146111	13.7743956265314	14.4457022484968	13.9169802613886	13.9791679560451	13.8761880964104	14.2014106732282	14.6970201147602	13.6711683353773	14.4217539422233	15.1023832671032	13.9315650194193	13.8346463326516	13.942065661542	13.5536625532301	13.7196234250666	15.0079435388061	13.8905786172238	14.0176905323792	14.1589253517278	13.7568158843548	14.2548913867245	14.7887430306171	14.6401095320757	14.8435860631949	14.5112877624222
X1.80_493.4864m.z	12.450971365905	12.6979874211971	12.1994143791322	12.4716630306871	11.929159923912	12.379375551057	12.8736030736811	12.7919620130791	12.3060534899924	13.0574264775165	12.5736762877163	12.9140708043225	13.433089682516	12.813069155142	13.2694348952299	13.1696461672714	12.3978035453534	12.913423967738	12.3871371850742	12.4186823252577	12.4810211554074	12.8338525828942	13.0520113586588	12.2959717614476	12.9631610385195	13.4634412408495	12.4074048896	12.2556499358507	12.6199944490017	11.8761397474887	12.3275306027902	13.3117103713823	12.454239929749	12.5059250951693	12.6629061381557	12.1244494285312	12.789412074636	13.1526158598447	13.1536906354823	13.2830767863166	13.0874758434659
X1.80_549.9984m.z	13.2294111719946	12.3657293598613	12.9301120466016	13.3161600805406	12.2969674787143	13.1748709152937	13.494087498181	13.6778129672271	12.9914700446768	13.7765367766076	13.5423937747299	13.5246767760045	14.0832630723041	13.4761517677379	14.0078617664947	13.8420792009161	13.1628304636603	13.5942058699683	13.1924102463631	13.309332679719	13.2241518017552	13.2672536351264	13.9541249574669	12.5563538353617	13.5646773235469	14.5515583397462	13.2421752788681	12.8442063499705	13.126991340208	12.6648153275215	12.8862672854624	14.2781358120227	13.0642347580281	13.3177420756719	13.461414802793	12.8152352684646	13.3520845633283	13.8506751326613	13.5613171234005	14.1567264268645	13.713862721786
X1.81_641.6653m.z	14.2113883664843	14.3773320104133	14.2032971877614	14.227096917947	13.5521782350026	14.1951280430404	14.3427701789425	14.5526395563582	14.0484235302566	14.8344117795556	14.6927655228729	14.6668803042895	15.3037639046086	14.5397094381912	14.960587020864	15.0246070796261	14.0764293461926	14.6461568311144	14.3348221823454	14.3531409821241	14.2048813192691	14.4646467674186	15.0589318672684	13.7844544837305	14.551150020253	15.6079756597939	14.0722153044779	13.9564036196764	14.1845953155499	13.8326751428265	14.1135623799378	15.1577107065842	14.148644299345	14.0659461133821	14.3338695307314	14.0733869553279	14.4763000854006	15.0367133410921	14.9413522751081	15.2418476993312	14.875800836953
X1.81_513.3114m.z	10.1863775698662	10.4781598897623	10.3403424238148	9.50473183771613	10.1689624496474	9.24428189485741	9.53029746646215	10.0552551010883	9.5106623253338	10.0373766479798	9.65102603414559	10.2912021571051	10.5932323239522	9.66724653701144	9.70365862352721	9.39476096903547	10.0932120044886	10.21716594938	9.50970646019031	9.92902402327374	9.7978074427831	9.66012406845473	9.6260491391228	9.95091284326863	10.3207576495256	9.65826413831626	10.271012373279	10.0275778105976	9.88054351410505	10.1342495765581	10.0688818182323	9.77300223303562	9.16992909674882	9.69553648515774	9.49333387593858	10.189965117259	9.46006833250992	9.72464683296666	9.85083101352963	10.8189969567357	10.1427059535555
X1.83_891.2591m.z	13.3178082538588	13.227947304459	13.1710853717963	13.7610234600008	12.5492825591644	13.402334059396	13.6795744057698	13.8456583124209	13.2872109355929	14.0646492781007	13.5773701132806	14.3014774890907	14.6348659723444	13.6921879184574	14.5630968968353	14.4332033136655	13.4006092866173	14.0779889925945	13.7505811907848	13.5875299716413	13.6144553370415	13.6023300903935	14.6281359760884	12.75253970697	13.4926502453866	14.90509436792	13.4750673086364	13.3137994240718	13.3724833819775	13.0263888729957	13.3136240830821	14.5602870945064	13.1792318234924	13.5921079572332	13.6557524959308	13.0236138982212	14.1230452733739	14.513424521695	13.9789103724792	14.4446543334528	14.2014623425271
X1.83_1058.2719m.z	12.8462122017904	12.7433589941475	12.4097472931145	12.6303756124427	11.9366013957271	12.0774896291744	12.1132591080674	13.1424658116619	11.9932893357138	12.6573511823512	12.90466635932	12.4299572698203	13.4147852905746	12.3764143266863	13.0310917419691	13.2215282827405	12.1074015398719	12.505167721278	12.0934038374382	12.8634285166534	12.634327183473	12.0873907972773	12.8061473628834	12.190839711178	13.3034640681452	13.1473209718925	12.2359186962194	12.5908713815984	12.2874590112322	12.2773420998451	12.4165023305507	13.4189127346169	12.286469536594	11.9458198817282	11.5848369083622	12.7413672238211	12.6392194662831	12.5703148669511	13.743053459859	13.1784398575382	13.0170584119362
X1.84_887.0097m.z	13.2823856187114	13.25020639461	13.2778736619651	12.9096663531266	12.3841760167157	12.4819788146016	13.1346141480161	13.4120344982933	13.1861036606415	13.5043566810867	13.4544846972116	13.2802086985682	13.9240508836211	13.4739169098043	13.6615352438499	13.7199183018384	12.9026736748764	13.4493363830837	12.9911764177726	13.2203008568145	13.057041514112	13.2683611402102	13.7592177617748	12.6416001535751	13.3044928987025	13.9557230856922	13.4053326252442	13.3550881936473	12.8884202155088	12.6371611402151	12.835313568578	14.0350984697764	13.0455734711495	12.9086026003694	13.0691635984326	12.7528173507624	13.1177674901446	13.4829107094809	13.8688041078705	13.6735237256971	13.4888097424548
X1.86_927.6776m.z	15.2664192366819	15.3038787003233	15.2116377203039	15.3255021882972	14.7136147637909	15.2693453975761	15.6566507864709	15.7006174984347	15.2282656749886	15.8833022155944	15.7361951931579	15.8673269595198	16.3897929099788	15.6943405293383	16.0811248124637	16.2249827624085	15.0708891267552	15.8976562354122	15.1345819873357	15.1649264109682	15.2913244119287	15.5394374139809	16.2148379130922	15.0421319778908	15.7126482685775	16.789468494521	15.4196436684186	15.1804242809964	15.3625309841052	14.726305001069	15.0950953991517	16.3539879992284	15.2530792745634	15.3118843756308	15.5655405111183	14.9804308674328	15.497734439686	16.0512522402415	15.8602775152277	16.3490020779415	15.889423674283
X1.86_1018.2706m.z	14.3474617217825	13.7279439146445	13.3272827730535	12.993134226438	13.4057604747424	13.8631069525845	12.8620600629279	14.4044079859675	12.4897643547862	12.8545880132231	14.0694486559251	13.0125657288391	13.3742145332032	12.629342359639	13.075872860852	13.0192506487759	12.9474179198904	13.706372126565	11.9520703172901	13.716008428129	12.7968946102144	12.9198539678359	12.335762165855	12.8876032991658	14.1389638562277	13.6709933953862	14.5021256265945	13.8662700301617	12.7427423853553	13.8644987821479	13.4492390229514	13.2504055292424	13.06452620366	12.8553659770606	12.1190198088165	13.9087740553668	13.821264775182	13.4516942505574	14.8703208519078	13.6853680989854	13.1788701923215
X1.86_1409.5363m.z	11.0436496000744	7.06755796425833	10.8819409765114	10.9407080250191	9.91336828955174	11.4940752947819	12.1060109969858	11.5727082130166	10.6710022222691	12.0102268498641	11.4091904398036	10.2009772300195	11.1781347262852	10.0553353289185	12.4612605322871	12.1337095227662	10.6693095043435	11.1609901306037	10.108672448678	11.0476625417804	10.1719419643707	11.6708399224288	11.7303935122441	10.1746552810398	10.9225925931325	13.2651943611612	10.2724854134362	9.00067256861105	11.2948066141928	11.2765623899344	11.670056551268	12.6822756424916	10.3038200281148	10.0497799691486	11.4400059213967	10.2012350326131	11.3910016378943	11.7673653494912	12.0796313356414	11.0006794972107	11.9699723678774
X1.87_925.0152m.z	15.2790690456182	15.2588062857358	15.3891550076378	15.3205360218986	14.6250820882557	15.1127760707883	15.1714176620938	15.5267218420477	14.9076156790604	15.651076249284	15.5263958838726	15.5644489850269	16.1431704099037	15.4082093834423	15.9444235174914	15.7766751616575	15.0794880434872	15.6376135506514	15.137282006884	15.3423221044281	15.0709106732198	15.36040866719	16.1339292418206	14.963594522866	15.6473043022247	16.5227681424076	15.1193282973619	15.0204120985626	14.9982817413164	14.5434814870886	14.996750133904	16.0409795597352	15.0536260977409	15.1184128721085	15.3073454304268	15.1118285132593	15.4828180837644	15.9650036683766	15.8672074203887	16.1792884138968	15.7345542793984
X1.87_988.6923m.z	16.0914942583898	15.8832840510772	15.5706713426478	15.0527182567569	15.2873714223875	15.4668979422289	14.8790891759333	15.8230553071044	14.5342976236029	14.0661401381956	15.6378087545505	15.3199195081067	15.055976869653	14.7889360636835	15.102804136819	14.7246143827934	14.8458157232489	15.2747810502901	13.7528287463694	15.4702482036078	14.7047326553922	14.8077400555873	14.769565450419	15.1163278678564	15.7592838499533	15.480235527279	16.2484836401558	15.7882975175306	14.2907375028306	15.5015449111204	15.3295166842751	15.0128045541545	14.5553926290879	14.7568990643237	13.9316622335247	15.9599039360469	15.6144041200555	14.9258699122197	16.5482519321532	15.391267176532	14.5590953181152
X1.87_951.2683m.z	15.0448339779699	14.8882034420815	14.6376666199112	14.4333611056044	14.3245365473163	14.4646849688564	14.466234845971	14.7396900990155	13.93404967038	13.9574748132908	14.9812380142457	14.6462476801841	15.0317237455343	14.3088385150122	14.8744953092028	14.7641947723805	14.06420085516	14.4868654650815	13.7788491555829	14.5172536336402	14.2258624248754	14.4373198290556	14.8399575797346	14.386178088093	14.7247829067912	15.3497992600063	14.7385595230817	14.6540950962004	13.9174670721852	14.4069476455788	14.4403900726275	14.8377641532299	13.8862787100653	14.2375204476688	14.0218981373966	14.5501309499004	14.4895071524188	14.8386616220275	15.5266839893236	15.195459962449	14.3861293368162
X1.87_1017.7718m.z	14.3853248581985	14.1315720684357	13.6697711065028	13.3126463901542	13.3225645164366	14.1679673188323	12.7347970772347	14.433997394129	12.3103057315762	12.9667894727863	13.8954640118016	13.6279034054881	13.5320381471087	13.0085445189901	13.2730465006949	13.1652790178661	13.202954331301	13.3294584899112	12.457796670317	13.9823596316046	12.9335834811249	13.0732220310669	13.0981506702707	13.204979968157	14.2178882868576	14.1607570971173	14.1841557755963	14.0835208435333	12.7545641667482	13.9307749465035	13.5425789500592	13.481781895707	12.5541657049644	13.3287425188048	12.6793808460179	14.4259227882427	14.0811337066524	13.5114196883702	14.8641960677644	13.7435673732676	12.9873833433883
X1.88_1016.6818m.z	16.0462406702678	16.1605280731495	15.9151487278907	16.1443026036153	15.2764371989237	15.8493923156257	16.2330054836679	16.4659920920316	15.7208160735739	16.610823218331	16.5666228119901	16.6850255484026	17.1955508999153	16.3821805929731	16.8440074481321	16.816073486159	15.8541447411805	16.5606510750626	15.9985595428361	16.0116663189219	15.9165629743327	16.2271559405365	16.9461171970614	15.6085319354162	16.4327873813754	17.5388956848048	15.9840215553114	15.7564138955947	15.9221314716971	15.3825749772663	15.8480648803519	17.0885859762495	16.0228918620086	16.0446822145501	16.2512112339091	15.69708782865	16.302468628802	16.8520801066491	16.7582439553781	17.0426226178638	16.6295315834596
X1.88_767.3363m.z	14.7637096142049	14.4544711612692	14.3933804096212	14.7777689247096	13.8758945477544	14.3456710537196	14.8344714081979	15.0311810302011	14.4450645587478	15.2247983494659	15.1511505092887	15.0293782422108	15.6374892127177	14.9553139366598	15.4275938383446	15.429314584368	14.4929684752922	15.2053023113299	14.6541668387709	14.5951840819509	14.6251304884027	14.72596558478	15.5045340791383	14.3233217985411	15.0740936885331	15.941971880257	14.5684942698164	14.4497136221215	14.6689612901277	14.1162183853776	14.4600456768539	15.7280712333824	14.5864319575745	14.5902594679976	14.8462137217465	14.3467748700537	14.9374295220707	15.4385486238343	15.1839077987006	15.6059116473278	15.301639198848
X1.88_702.6803m.z	14.2803659274567	14.135065953184	13.7130099291129	13.1394473569039	13.3323204241657	13.6098643978928	12.9481683756842	13.8835965028298	12.7663295226651	12.7816829197011	13.6625515818926	13.0447362164114	13.2740771139591	12.9496184172032	12.7743340882741	12.699123054078	13.0342922851683	13.2204585488297	12.1267009463439	13.5531056924395	12.6789097253631	12.7593878830479	12.3976777768912	13.4511223345942	13.8072852134129	13.0373812234596	14.3886670486478	14.0487979990513	12.2953617226436	13.7656794887902	13.3424545001548	13.1167557930853	12.6037548013722	12.7559769010974	12.421302442202	14.005033639118	13.6207048923953	12.9604222355348	14.806165646385	13.5083769340194	12.2980741657653
X1.89_1418.7899m.z	15.0336659053744	13.1852674721383	13.495426081654	13.8092320422421	13.4511154408377	14.6404494187191	13.9105003028753	15.124168154542	13.2407561012944	13.9338904293618	14.4445940314792	13.5758117915037	14.2899963648055	13.782221955536	14.8176901187516	14.6681913848818	13.5356417646119	14.10719954648	13.394259582519	14.1214907783068	13.5138024477352	13.7017156308451	14.5451671890239	14.2982436868119	14.6078134625075	15.1500198313313	14.3883254049213	14.5493170869614	12.7450773537715	14.2603987381583	14.0224905176339	14.7065155449426	13.7866358454484	13.2306207265463	13.7234846033539	14.4790752723711	14.8698659611739	14.7258655351742	14.7562219021602	14.0058977998843	14.5947409623066
X1.89_793.6816m.z	13.057341671924	12.8096992018952	12.2910575494171	12.29464246564	12.2988038707883	12.4718122051476	11.4856638483348	13.0545297870212	11.4118662408284	10.4704405665063	11.8662503762322	12.0746047969436	10.9568245948889	11.7651644828981	11.7101288411821	11.406274288708	11.9133645531075	11.4074571209865	10.1702583371439	12.6477836364103	11.1200761723585	11.2666242412814	10.6992409065793	12.5497315612217	12.7817814981113	11.6724172570038	13.2065738955224	13.0409193911886	11.1384138767444	12.6420641220176	12.4019383363444	11.6007277969906	11.3093708358925	11.2182975352812	9.81867369952451	12.8880073174531	12.6185154242743	10.9969554642194	13.6622368512346	11.5574395401303	11.0638524040635
X1.89_158.0136m.z	9.75132085891845	9.87479618453549	9.74323917149752	9.6433583556858	9.20492120691196	9.36004501426103	9.86873919330367	9.67287166430386	9.41218479783657	9.67237714727559	9.84653693227071	9.92509364607701	9.89472068726269	9.69993250971448	9.83140649841075	9.78629194517126	9.38573516951371	9.76707481506317	9.10949782448079	9.29800110829778	9.09663236828253	9.8472928844059	9.87430277023095	9.15224643591436	9.44550908230716	10.2743479032358	9.46985021725606	9.3743398272583	9.48630155677579	9.4228878104029	9.31289589985291	9.96994025017415	9.38806690774901	9.65121986241535	9.40961636301967	9.33595145527288	9.38311506590737	9.80922549842421	10.1784417352141	10.0078059944564	9.58725761391911
X1.89_937.5189m.z	12.2868600599163	12.9343946735707	12.5449741957161	11.7330353685519	11.4057935373818	12.3575873249812	11.7396128229743	12.704582408653	11.4763357528243	12.3515516322552	12.4526370940997	12.3475136108033	12.3218633901873	12.3386506682538	12.401297272696	12.2816009089411	11.8356066264704	12.4882761463556	10.8531352000608	12.5733750287406	11.2766180810885	11.9551440828664	12.6916596021539	11.8881377871301	12.6557179493497	13.0264215953233	12.3258864880562	12.4203502625967	11.5806411886674	11.795217893344	11.7375791957266	12.9431742448085	12.0192698319748	12.121608618224	11.7027446598867	12.0130002825257	12.1637095484726	12.2189636401744	13.357784053009	13.0573635252395	12.3453889596359
X1.90_703.3460m.z	14.7110344199457	14.3995542748428	14.3876469023113	13.7374142293457	14.0551766637901	14.1343123708584	13.3781390012096	14.2825764163807	12.996721380854	12.785264213531	14.1896864667324	13.6754970510692	13.593880730632	13.295377599795	13.1422791418402	13.2831928323281	13.5157080806139	13.59605385758	12.4951237323997	13.9142839819098	13.0899397220726	13.5455902536163	13.0419752907646	13.7840515373396	14.5681767807961	13.5883014814585	14.8924262080753	14.4518148254565	13.1744680111953	14.1933419937508	13.8420560427328	13.4008327918029	13.1063448267934	13.1652023699144	12.5935220922825	14.5477557577185	14.1140272147127	13.3336097501603	15.2087095473655	13.9959745905543	13.2505478507251
X1.90_675.6693m.z	14.0202289780444	14.4636502941314	14.0336123960005	14.0153172028971	13.5282911928228	14.0252545591979	14.2414858516189	14.4471546737187	13.886975872021	14.6725249998367	14.5503725540423	14.5574882013445	15.1743987221294	14.2879216755606	14.7920982158808	14.6580630562556	13.8768315854338	14.7449553714641	14.003125102953	14.0402329662789	14.1619871735952	14.3584644333907	14.714864253242	13.8788600602945	14.624774023275	15.2577223026172	14.1377439517386	13.8362238018666	14.0670942549454	13.4467219752114	13.8514635095151	15.0369324367355	14.036295405032	14.004999193197	14.3604273917981	13.7610290149828	14.4469946303439	14.7708409926562	14.9107619046692	15.0240888644834	14.6847610887269
X1.90_937.0200m.z	15.138230949216	15.133423811544	14.7343491353269	14.4292169963396	14.2329413795057	14.5454553497743	13.9964374537209	14.9377938294007	13.7703634384428	14.0713978653066	15.0827226361432	14.628546405356	14.7628674846052	14.3363357535382	14.496967669317	14.4046890961608	14.1704982837371	14.6863091667812	13.5132128648943	14.8545577638249	14.1050060018199	14.4630754989242	14.4039532917645	14.4177958289898	14.9455956673527	15.2577167454063	15.1730280796697	14.9845790613228	13.837705627012	14.6466464035075	14.2967004129312	14.5425928688864	14.0213444317661	13.8989860867784	14.0078068817594	15.0146202870504	14.8328164457322	14.5382819496316	15.7984181666658	14.764129151292	14.2556338206689
X1.90_1111.7747m.z	15.3059336671849	14.7734105597985	14.8293425069852	14.8058349966663	14.6311850287952	14.8355551109564	14.8962021762589	15.5015449111204	14.3563074432196	14.9380438520111	15.3450914365937	15.3846573373921	15.5371548756853	15.0369491755201	15.307952828484	15.3101624455711	14.7610194714872	15.0980231040734	14.214082571565	15.0611510922376	14.6260299265607	14.762313125315	15.4961054220154	14.5284641362551	15.4309646991717	16.1117638193704	15.3972606685871	14.9588652481037	14.4429128789224	14.7844841088608	14.8440546860359	15.656628226376	14.4727792282924	14.4211972534033	14.6058758394263	15.0264049340932	15.2196226246161	15.5288329051454	15.8011677603657	15.4503260040468	15.1697582753633
X1.90_1071.5233m.z	13.8209166641947	12.810822415951	13.2191432133102	12.5244810421985	12.7404006124477	13.146092394633	12.7389953282826	13.0799466828478	12.2700260106082	12.8491494436337	12.8283076666077	13.3935441671699	13.5593379297043	13.2212992200027	13.079319001008	13.7178450565392	12.5495157742633	13.0870636086238	12.1851129044208	13.334755181987	12.7046152099222	13.077049396686	13.5949414168711	12.5064712120533	13.3399225457858	13.9489435779764	13.4154817317764	12.6234970482246	12.1822773174421	12.7369353842388	13.1740498329319	13.5178363374143	12.4985917310924	13.0344411503426	12.3192527010607	13.2092952462997	13.0169410876031	13.1184965392856	14.1620870955071	13.3472736268486	13.3494709648523
X1.90_506.6663m.z	10.3351537330018	11.078609615604	11.0535879958341	10.3672077328439	9.76616865925728	10.3023683103003	11.1359909885318	10.7045427443682	10.6681415412553	10.8401798826432	10.7575221977621	11.3983796949214	10.9357218057524	11.0734807322648	11.025364023332	10.6218680485555	10.8093030998795	10.6935819416435	9.9717700450461	10.4871602788565	9.92185938449107	11.1518402500604	10.8466172919962	10.2917100666046	10.4426052564444	11.4805100016431	10.4813701587365	10.4992612915015	10.4381536520999	9.64490767801548	10.3415909487186	10.7802825303127	10.6328119522439	10.5723255882884	10.7934847511249	10.5752757618459	10.9308901087976	10.7260652512226	11.3023883703756	11.1915582057567	10.0729901087756
X1.90_1202.3645m.z	11.666284367529	9.80078758191584	10.4477500546603	10.7375308356665	10.5768441734569	11.9544672254805	12.3319791079269	12.5075159437024	9.68217637053894	11.9130210424879	12.0993747733044	11.6637870614006	12.4153805778538	11.7779143715908	12.3745379724009	12.5203706997644	11.8587969249155	12.433261694086	11.064561321393	11.3483582337753	11.269810878806	10.6169338913379	10.708220946816	12.353255496747	12.3969950578136	10.5584577040445	10.9330712977248	10.2688582790468	11.2452007775143	12.2477051447799	11.5508571215403	12.5937357632291	12.1152656865148	11.5577319965297	10.7979977476045	11.6272648467019	11.6491989393112	11.9144725391712	12.5928457664843	12.5280652858865	12.0879440343262
X1.91_881.3536m.z	13.4664624787282	13.4890700703033	13.063235471278	12.217969432606	12.4398576717539	13.1050948428074	12.803905843901	13.4101831692585	12.216417316867	11.8203300734771	13.1365064580614	12.6794131265398	12.6961611569138	12.1572678926555	12.4026526020534	12.4917692598685	12.14312826229	12.7589921969228	11.6299328096082	12.6193871851194	12.2109850015369	12.260213937521	12.6947934471343	12.3175040072978	13.3409856377786	13.2258644234486	13.4708386669671	13.0429308077347	11.9742599778956	12.9936362027553	12.7252028534421	12.9094662262035	12.0579904165563	12.1496391530404	11.8753057397513	13.4059237851453	13.3666142685273	12.8242820074272	13.8209028685297	13.228906634079	11.4101875652025
X1.91_1097.5256m.z	13.5997907979782	13.228185443729	13.4382672482837	13.0756518268432	12.7029927808747	13.4233679652458	13.4388122534037	13.7840391443705	12.9791055466365	13.8972994711698	13.6858118047596	14.070170007894	14.1130678808137	13.4985162083596	13.3470800256262	14.0072560114173	13.2199601953484	13.8056671779311	12.8525927972305	13.341562330101	13.1800595701215	13.4735007695364	13.9210279613512	13.1755356665254	13.652946244372	14.8054703237041	13.1791907277606	13.2295451589284	12.8978736976021	13.1814092702001	13.0974217995408	14.0544892539542	13.0685912657177	12.9947518907111	13.2485627699007	13.2963726734547	13.3679734937599	13.8585193856158	14.3400897444568	13.9626076638828	13.9482172231329
X1.93_1196.0205m.z	14.7616883544357	14.1585197757267	14.4783050249931	14.7287806570104	13.7845842832395	14.6511939655683	15.0465378094487	15.1119061165039	14.3359110065944	15.2030477707776	15.1755965505765	15.1465132712295	15.6893387376079	14.9128230259682	15.6907559818316	15.3575969879393	14.4339406294995	15.1197879281032	14.4667863900519	14.7298288345432	14.7206188494968	15.083862915805	15.5841491063323	14.6784184423536	15.1455184731574	16.075790875231	14.5406021315377	14.6227684057199	14.6886877465998	14.140436121026	14.2208476425835	15.5497534075808	14.5673717776868	14.6789323831296	14.9596448207598	14.5140336576092	14.9705296840404	15.5215841747131	15.3300364052822	15.5011034885121	15.2369695207963
X1.93_987.3608m.z	15.4267933162351	15.1550663313401	15.0522614620616	14.2118397231896	14.658939608302	14.716070026873	14.1913622204883	15.1110328551467	13.77966970546	14.024382828345	15.2217399307715	14.8805141489958	14.3465736863935	14.2647543785487	14.549874378408	14.5719925336677	14.3515576943423	14.5208990140833	13.2037734392609	14.7089102482822	14.1331484245063	14.2941455615737	14.1422545529025	14.4509845848767	15.2223706792328	14.7482307699208	15.5933232685126	15.164990939394	13.766820825347	14.8102909823216	14.6429567103162	14.5001953875374	13.8001761824035	13.9454031322977	13.4695912922275	15.1806384763241	14.9757329358831	14.1443159657172	15.862318571703	14.5948370356408	13.9213949290221
X1.93_768.6674m.z	12.3167958382151	12.4981439770597	12.4298751689639	12.8867641858051	12.0988977969427	12.5964074512637	12.8164405922526	12.8696502702664	12.2456565830334	12.9087143146614	12.9270619044217	13.0789113675471	13.5846729608484	12.2742033446945	13.5260075980697	13.1768288647667	12.4128943024356	12.4238872285872	12.4310352710894	12.9222114127649	12.4182158932245	12.7067420557508	13.1782298093158	12.6248639435723	12.5160914129083	13.7619898153635	12.407556209733	11.9961704636746	12.2798341348711	12.2509274560671	12.5076444772479	13.3941837982018	12.7401631071582	12.395330381767	12.8461982578671	12.0887257613929	12.7235309789702	13.4379458851555	13.281552107232	13.510249745018	13.1431337339825
X1.93_1111.2751m.z	15.1785006384029	14.7455411571344	14.8567102065262	14.7189714113461	14.5058845157952	15.1556894623632	15.0010743161405	15.3887856792162	14.3405558275336	15.0034617614974	15.4189341490037	15.2663234990628	15.4861117054862	14.8076287362175	15.2061207046234	15.1306385027753	14.79352227289	15.01881258886	14.2538925128712	15.0289640583673	14.4624784484595	14.6864270262859	15.1721343996131	14.5555107444548	15.2545724900875	15.9127276393147	15.3283002562912	15.0219957206418	14.5188942190568	14.7135313385995	14.9391885659555	15.5210044445747	14.3997001713837	14.5668630145154	14.3080156880895	15.1151756218289	15.2724566013063	15.6786565847631	16.0312807352875	15.6443711606693	15.2116503777374
X1.93_941.3505m.z	13.3383320683486	13.6500154092831	13.0926721080683	13.6146709420294	12.5734754073374	13.3597589190819	13.4561239126141	13.8427362317822	13.1537784839067	13.9353897185815	13.4014172148608	13.4693716651445	14.4199597036343	13.6625480974551	14.4730741741701	14.3218880243746	13.1549474442039	13.8623660878569	13.3995265105268	12.9847550816643	13.5380682715516	13.7038873812896	14.181877013037	12.8788317399492	13.6885655157283	14.6159676469949	13.2214596007664	13.0080097370574	13.0168287804015	12.4344719904201	13.1576633939777	14.3134636834322	13.2469968244385	13.4681190370109	13.4750606350497	13.2239931933022	13.3131074659806	14.3533335007681	13.3735064116344	13.9652070103814	14.0383915911551
X1.93_1071.0246m.z	14.6299483203075	14.1426976731394	14.1923010789173	13.9066234404872	13.6534589558391	13.6989317474415	13.7916616275949	14.5709371816992	13.5113964654324	14.019657403706	14.4579050971278	14.1461429935166	14.9442797781059	14.0310967943127	14.7002223939685	14.5192266902146	13.7706929968295	14.2550417341737	13.3887851989016	14.1429106899344	13.7062862699944	13.821986828765	14.3891280440578	13.3657067718578	14.1307063558992	15.0680654111623	13.9105647597806	14.269778639	13.5481446791196	13.9904728427075	13.8339025142752	14.5831740011995	13.5855935451782	13.7733175545439	13.7899104639843	14.2050548921217	13.8093319739181	14.5678937293892	14.7216773329462	14.596962677888	14.3358160875824
X1.93_793.0156m.z	13.4370396995272	12.7691373887756	12.8270949419553	11.9937045931298	12.5537448171518	12.5920039987051	11.799681981545	12.898649725785	11.613620766025	11.1405500562875	12.808050050685	12.137301590478	11.6772602005248	12.1256791940353	12.2159780864937	11.9150297695464	11.808970968741	12.3973526013879	11.4803325894483	12.5093319881872	12.0866599828586	11.7142238469624	12.0383303410131	12.0697098645526	12.6945773530521	12.3627359171885	13.4681063791601	13.2418227075645	11.4073676668342	12.7559528802223	12.2762504949356	12.0002956203042	11.4481219281605	11.4355082423499	11.4447699582314	13.1366780796822	12.7721075788195	12.3658544369438	13.7915529456544	12.3981483704534	11.0647499877344
X1.93_1202.7000m.z	14.5304464789425	13.9017057371654	13.4577393056288	13.3222992465836	13.6369423498436	13.4171764761982	13.4072672792483	14.1399896313815	12.4311058233522	12.3662397742065	13.7098276707142	13.3585203432817	12.4790699737253	12.8624594034142	13.4243684539516	12.5458198881935	12.9850926789372	13.0963001641942	11.8045940193263	13.6911234203031	12.9009842804483	13.4113279539539	12.7676738150147	13.6848550785256	13.8310988139476	13.2739094008209	14.5954937541462	13.9865158066453	12.3080846969407	13.7695440322235	13.118385001644	13.2210125772157	12.8692693449952	12.6234352720332	11.8673671942931	13.784538200838	13.5358104237862	12.8938528065485	14.7286402199471	13.3883912465128	12.8870881382449
X1.94_950.7682m.z	14.9011766653155	14.8388698662566	14.928240113062	14.3116768417823	13.997904655307	14.6216631365473	14.5584413848589	14.8571927240999	14.1261431489118	14.1924359338247	15.0702290537464	14.5363039681777	15.1361357600166	14.4478989268379	14.7955583340526	14.8239399070818	14.2595588937474	14.5444269149068	13.6742332973916	14.6537674135538	13.9189052035845	14.542737959936	15.0126950943375	14.2356791385573	14.7709095382579	15.1859925436096	14.895492943891	14.7435185648458	14.2407865469237	14.3278623358785	14.472626813955	14.7823483755031	14.3694728885827	14.1216199298163	14.3713905058026	14.8223691274953	14.6796973349647	14.9134695463745	15.6111673426706	14.9626515101811	14.6051141172316
X1.94_1432.7886m.z	12.9646164154055	12.4919162824346	12.6004403926237	12.3903322913854	11.5595271687064	13.4917994645033	12.5321127947058	13.4803951047299	11.8806036966086	12.6414082938005	13.4049705938123	12.510877935604	13.6373066371104	12.8178163926566	13.2385131000056	13.7737982468179	12.3595318738505	13.4533795186061	12.2730613109536	12.8815694653157	12.3418572862569	12.4573440978417	12.7625934440371	11.2518024817625	13.5499242852999	14.4419880993899	12.7983399793143	13.0012128565046	11.8409053247756	12.0064724969495	12.1470903229653	13.281305189796	12.4315138109989	12.5133818533224	12.7173141180517	12.2815523861894	13.2351602523366	13.0181481678195	14.1583289346531	13.5958038163559	12.8304951472722
X1.94_1405.7880m.z	12.3217705999894	11.2001229888989	12.2328799815306	12.6496665195299	10.501456774412	12.0212349474901	12.1307291973885	12.238198475953	12.0926666270634	12.4634828296773	12.656451572937	12.3895430234912	13.1028300022917	11.682864727811	12.7640821807698	12.4515562098682	11.9940979728936	12.6373927403429	11.9557385446063	12.8131444545996	11.0443251857772	11.6484061278951	13.1035536395108	12.1579209943992	13.0789319425038	13.8012953301874	12.6237116511683	12.211268211786	11.7495044309155	11.6891367063749	12.1401382806296	13.5503171858973	12.4636129591226	12.0888423475158	12.44486338977	11.8356391969576	11.9278786978919	12.8117670433518	13.4428224632265	12.0921706160539	12.8908685443202
X1.95_1276.0338m.z	15.6895677745692	14.8236103192781	15.1422286452499	14.747378985894	14.6678997488565	15.4453885961627	14.6274748283205	15.6601818924472	13.908196952496	14.15809102175	15.1849499949028	14.863192038568	14.6396559546419	14.3874013603824	14.7282760167841	14.378055372929	14.4587997174507	15.0728357739847	13.2962331038426	15.3292376809879	14.2645144059357	14.5653704114825	14.4687987617679	14.8473527036551	15.3752692795708	15.0984064420163	15.975051839774	15.4657896372276	14.1324861577819	15.1989055970349	14.8617247307461	14.6191647595665	14.3505254304485	13.9086701779081	13.6090184933588	15.6579301606101	15.2847744733535	14.5828352962402	16.2164912740348	14.7441098730148	14.4246131448795
X1.95_882.6853m.z	14.3447482336711	14.1321937001224	13.8765003851868	13.4098200999787	13.8166873433554	14.0974919163753	13.272274990259	14.2006685866081	12.7155075129701	12.5415658462024	13.739795431962	13.330540445425	13.1159426637523	12.6462187487974	13.1675304938252	12.941260714217	13.3417439322659	13.4547612013357	12.0685605419821	13.7613301526958	13.3070946157695	13.1822577498828	12.8758666098685	13.4607806220104	14.1651301288047	13.5686888624865	14.8620588518684	14.1159065484154	12.4720577624002	13.9919072557053	13.4184623662398	13.1581868716335	12.66168503365	12.7427299615728	12.470784336125	14.3058985019803	14.0194085116669	13.0597132386499	15.0590175340181	13.6323349347406	12.7933885025418
X1.95_763.3410m.z	10.9042178696091	10.9564596706165	11.3917889535421	11.090567173699	9.27024489845811	11.1619519904542	11.0981094705677	11.109794562399	10.751143096686	11.5217968746464	10.7429440401358	10.946517938048	11.2462234822397	10.8517395981813	12.0061947638157	11.4877115275333	10.394148749943	11.2918681253235	11.2560542992217	10.9532682854994	10.9063541807651	11.3670283898089	12.0497439978434	10.6441601801453	11.6533958684196	12.4047163386288	10.2552545462123	10.4937774057341	11.2849959552336	9.5503943580303	10.5278728682391	11.4458138685897	11.426568776682	10.9579701613069	11.3621060755975	10.61439069793	11.3768614486449	11.9159095395203	11.8808909153038	11.7292270587743	11.9952470129867
X1.96_1194.0236m.z	15.0955502615084	14.7149199047518	14.8790078910874	15.1658684488575	14.4379095477704	15.0386038590088	15.1229314827179	15.5289056248595	14.9030992961259	15.702598918827	15.6237232633487	15.5669545206747	16.1112071163872	15.2149953727058	15.8085963483205	15.8120141077514	14.9208950555381	15.6566701091559	15.0623645196527	15.00854901246	15.0111982109442	15.3560408903381	16.0357608440707	14.8406142578676	15.4151042257289	16.3655797152761	15.2881643638227	14.913337770384	14.8753560173712	14.6575726876093	14.941458246275	15.9139600742805	15.1425713932077	14.9068217131674	15.1438508375922	14.8264832651624	15.3651420338826	15.8296699411402	15.7061107995802	16.0477422988096	15.6075693066734
X1.96_819.0083m.z	13.9699600119858	13.5122425350205	13.7614230954586	13.8280600661348	13.078481777315	13.6540063598954	14.0093269869681	14.0713908818585	13.7253536053238	14.3166871487645	14.3268311015693	14.268228480189	15.0059439571621	14.0466683537162	14.7031143938589	14.6422144408157	13.7285278010896	14.2383943876966	13.8977961758821	13.7333106448065	13.8607823229423	14.0380239918501	14.6738208972788	13.3675052523524	14.3601633843722	15.0639143430135	13.8567131657154	13.3435774247787	13.793724552678	13.2106534925438	13.4719048895104	14.9115101146553	13.9338573718236	13.671717522147	13.9541697025239	13.5196894037078	14.0858513575565	14.7512805442708	14.5158653376871	14.7958816798408	14.6498614851484
X1.96_1270.0192m.z	11.7790178087917	13.3713163633461	11.8074306106552	12.3542688847431	10.6405969671737	12.2912560970861	11.946685932048	12.1491247986044	12.1482094819736	12.7725052617533	12.7013454584053	11.284464130602	13.3644604275043	12.5970513675256	13.301923907522	12.9695712541519	12.3287086232875	12.4397980885572	12.3241941682919	12.7458929897485	12.5516546671925	12.8219329942641	13.1583186564526	12.9029451764471	11.8928502037265	13.7129838939923	12.46389513484	11.2439805355381	12.5014765532241	12.0938151438244	12.007231008153	13.397670293262	11.8089029969463	12.2916129374627	12.4055507165056	12.3208257371283	12.8744180623953	13.176811129286	13.3244389677241	12.9470064703423	12.9580771360767
X1.96_1418.5387m.z	13.8991237678999	13.6754220362697	13.4248251004094	13.8139850833216	12.8960801913381	14.1526713753539	13.7636766327213	14.5385811100396	13.2288260705734	14.654730151589	14.8376372423511	14.052091758753	14.6521785115202	13.9270582432277	14.8749649223464	15.2044172243568	14.0697303117473	14.5369945927051	13.5266753154867	14.2516667635448	14.0469987801108	13.6557577145303	15.0442819641359	13.7499790698856	14.1112183970448	15.5751366768554	13.8634196852341	14.2064501565309	13.6895200940548	13.1752285890814	14.1171087475634	15.2001885765045	13.7729873468613	13.4836981965043	13.9466395304963	14.0852106962387	14.5607842462459	15.147867715626	14.3601727830538	14.7448374693718	14.9415408152248
X1.96_910.0086m.z	13.3021703006341	13.5787667210691	13.4492383234581	13.4919344680418	12.7292393200838	13.1636606462974	13.3485901385255	13.611452814223	13.0664555513234	13.7785053987683	13.5804602775154	13.6668619017436	14.4344360690973	13.5733327310992	14.0955184858523	14.2096277318805	13.2619599034188	13.8930090497918	13.1435930907325	13.4231217169796	13.4006571290403	13.5391311160952	14.4628985958853	12.8547078376067	13.6081379327062	14.6752895619414	13.0472264863832	12.9394053590312	13.3395779053107	13.3640948772309	13.5681184473229	14.3359913955515	13.5573996925697	13.416998091242	13.5850242898145	12.8995521622458	13.6615900281743	14.2344084208992	13.8223540219448	14.5035744139816	13.9242093286184
X1.96_998.0153m.z	13.6709977299372	13.9170690909664	13.913763723504	13.6121945675441	13.1331931985776	12.9448644362125	13.798094943896	13.9568211452958	13.6251197539984	14.1753125749383	13.9109246170753	14.1077661618401	14.7855118588694	14.093237062776	14.3268912698509	14.1627339592834	13.1724194327812	14.1401255225423	13.2203778761397	13.2786471993977	13.6860539636382	14.0623146589565	14.395883910267	13.4344663809657	13.5675658371872	14.8082713450773	13.9730420712438	13.3714996002891	13.4762905968768	13.3406811783352	13.172705905977	14.6748882459988	13.6252753548341	13.5139708453516	13.7713096316604	13.7682311068418	13.9906337810743	14.4787548118242	14.5206300341397	14.5461979014824	14.1788053991102
X1.96_1238.0300m.z	13.8841918108843	13.5084262644701	13.8994894976346	13.484708137248	13.2153049372137	13.8024073102597	13.6535824628867	14.4119668117447	13.4391989504853	14.1897504282246	13.8682004886676	14.0683032797922	14.3701931273968	13.6437780063376	14.0774920048412	14.0203556169459	13.0582093803203	13.9642119048961	13.0839664261573	13.7706738060908	13.149164025431	13.3673673997028	13.9744429825922	13.5464187433536	14.023841844885	14.7679711230174	13.9284144769983	13.6857746332687	12.9273269715146	13.3280009581828	13.5928715130654	14.5059600398521	13.5218363631953	13.1882894795373	13.4046402928227	13.8579670135066	13.5040147706162	14.1326426667336	14.9237608011403	14.1496501941721	13.9766296350304
X1.96_702.3436m.z	11.1149176529698	11.11605740851	10.9962173116432	10.2430347100135	10.9176795223691	10.6344495076832	11.2719843375663	11.3022873681182	10.4518244088586	11.2140615117857	11.3747171079623	11.4345990323876	11.508096848843	10.538060542832	10.8293399771255	11.1234680555128	10.6008515396083	11.6200123009063	10.7168628269164	10.5744067587273	10.8635991716583	10.4004168413831	10.5921185034624	11.0406358556193	11.4432341030835	11.9066803142311	10.9756454316843	10.4330625292138	10.7835796229644	10.6121954932568	11.2837192483725	11.7925209211986	10.8257953431282	10.8432453537198	9.98007992543108	10.965931224855	10.8026200000115	11.4421370066158	11.9114923493611	11.5803636838541	10.790748201006
X1.98_571.9925m.z	13.0053424545045	13.3231994595365	13.0246353088337	13.003829645351	12.4386127656763	12.7651199025719	13.4767656125722	13.3367024022534	13.229425252563	13.1821180586608	13.4768091186169	13.7453833377927	13.9138521925611	13.2780975200275	13.7309946770321	13.4533174448922	12.7593600217586	13.4933766772749	13.0865039867466	12.9837691879275	13.0827367377602	13.2342826469361	13.7051445433952	12.8330829946495	13.5664240829448	14.2473838923114	13.098027275441	12.8425587199997	12.6632070152681	12.4857657506126	12.9771065098165	13.9108382022503	12.8187517136065	12.8183022583155	13.0940678730386	12.8472979225286	13.3415822814625	13.5814287482982	13.4665695940925	13.729668706771	13.511890991749
X2.00_122.9747m.z	11.3009911686067	12.1212743010932	11.5802652734609	11.6304252890602	12.5545054988202	11.9219590738455	12.3325932941651	12.2954546273761	12.5900206656015	12.3677683789446	11.5872467785441	11.2507088794958	11.2417370486559	12.0954318122577	11.3998412126614	11.9911117206906	13.1206983480241	12.0709267186993	12.4188210166611	11.8156311763061	11.5804039330035	11.9355668674564	12.4402644325876	12.9824872114329	12.6316723567882	12.3837745790173	12.0676187918109	12.6588141004363	11.7786598965652	11.1922103245481	11.3963515805591	12.1320091743703	11.6262215571647	11.1276584268636	11.6599601203689	12.3011862349809	12.3635063512387	12.2307499783727	11.5412815827614	11.5225659202176	11.6368951203292
X2.00_365.2469m.z	13.3788911150141	14.0480554835751	13.5121375149062	13.3708902063128	13.2967020732809	13.3546555776852	13.0919796623646	13.1491978814893	13.1062611265326	13.2357551610303	13.2707930032	13.289725770265	13.4240000553909	13.1491989652183	13.2505736901484	13.1230182074438	13.1574414386946	13.5155453657366	13.0499911882165	13.1961675452023	13.1630123430956	13.1304020163085	13.1699540536376	12.9488975328391	13.3351132896774	13.4447136962219	13.5977634859964	13.1322254430998	13.29589439252	13.1805341210528	13.0553980795525	13.2779116334394	13.0395896231436	13.3965941501767	12.8001593345599	13.3135691806245	13.1824818757364	13.298640052194	13.8311682742032	13.6194678493882	13.0083136467811
X2.00_124.9829m.z	12.1958573071809	12.6363946847435	12.2979835957367	11.706069299487	11.6188392406221	11.8893740732831	12.3159997870469	12.2887557551948	11.84826775758	12.0254495380436	12.3315242815557	12.7197406310192	12.3793419104369	12.2790912948511	11.9566908997711	12.1223392015796	11.932429505126	12.3406088669799	11.5624774717173	12.0921159380629	11.6088522504245	12.3426675443284	12.0539615193704	11.6051082498724	12.3922809510796	12.7159613703917	12.0706039863068	12.0893100797353	11.8610506258641	11.8215508935886	12.0472252189131	12.4275140060699	11.749018705393	12.1775946907128	11.685500802096	11.9675564545891	12.1281751472635	11.8244337599742	12.8389860356905	12.6089988269075	11.6701870245964
X2.06_287.0327m.z	10.9750755437228	11.5317712178532	10.5349800731774	10.8521442970374	10.5271397666936	10.6333093920962	10.8692150782426	10.9239815112467	10.6831365776272	10.8631347249996	11.249353986549	11.4551502117713	11.2818057051764	11.1549389326467	11.0173455009149	10.8362538951197	10.9283310745825	10.932020947132	10.6427534041477	10.5058132948576	10.5723923113327	11.1170506137414	11.0094487081962	10.6071698908916	11.223960021728	11.5503456480279	10.9784578339524	10.3904086906362	10.549349487778	10.5234848888642	10.7650200445237	11.1133747970501	10.629749096299	10.740077517633	10.7357057031071	10.7950474420628	10.9210031118372	10.564241873079	11.4988372235745	11.1222209008257	10.6128012172161
X2.06_259.9363m.z	11.3591409748919	11.3035706141893	10.7730611930809	10.467484214757	10.8051232385172	10.7014086512083	10.2613778197027	11.0272387553731	10.0602510940934	9.92356830178075	10.603308868988	10.575063241425	10.2214462830022	10.1761073290323	9.81968793633451	9.66090845296127	10.1328200694435	9.97392502164324	9.45159983773876	10.2295740005398	10.2195182878826	10.0286013926142	9.51265717642046	10.1170392321828	10.6622486402743	9.63872576608796	11.3621712337423	11.1058060121643	9.69269268668973	10.991206876821	10.464455305308	10.2193556027251	9.9921624375254	9.84712672195879	9.5714765871575	11.1463164796874	10.579246641601	9.34328920430141	11.7122524680484	9.67524791418884	9.92432738352212
X2.08_257.9392m.z	14.9989594448772	15.1139046099255	14.6036606717657	13.9487201112984	14.3260406364743	14.2211798970666	13.9123478792559	14.4170619234632	13.6924445462818	13.7100370478713	14.4098449472211	14.5081631520661	14.1248780016071	14.1885868020262	13.8315071757141	13.6354486343739	13.8155614776823	14.2012177618233	13.1793988044306	14.1150775001284	13.7667172792284	14.0450534813695	13.5968467465931	13.905465412097	14.5391419967567	14.1363810995398	15.0105386000262	14.7000864923705	13.4186163421657	14.5222657129229	14.0514224458965	13.9527821319654	13.5217625441896	13.6108413099456	13.3335709625162	14.775151208538	14.3866605319771	13.4829469038488	15.5274548150521	14.0763713848955	13.4854263326939
X2.09_327.1913m.z	14.3832639733033	14.950021268643	14.2999580546801	13.725292890629	13.8505756655624	14.0611650374446	14.0467602641828	14.1436138138413	13.8355945125055	14.0448642203804	14.2601511293643	14.4161475739609	14.2787662585354	14.0710664143451	14.02338898211	13.8685495431047	13.9153998418122	14.1139251967343	13.4879766553217	13.8425377346776	13.671511026102	13.9965323629161	13.9454519879501	13.8456586204046	14.3088792381664	14.2883560772543	14.3196474922155	14.0584067628988	13.6609439842012	13.9620446623258	13.8531746673062	14.1131200971342	13.770445087899	14.0350651635384	13.6386222149519	14.1176622181658	14.0692527279657	13.8416342740382	15.0134175136367	14.3003706951913	13.7892618194318
X2.09_313.1758m.z	13.9523516206566	14.5172679419106	13.8829802570978	13.308154390441	13.5445806270288	13.6675946352614	13.611926119031	13.7652531371896	13.4172705448802	13.6075709126823	13.8789275978141	14.1847251330073	13.8452104789043	13.6969787246483	13.6740147540259	13.3648129827182	13.6680508084885	13.8046674336482	13.0643032877797	13.4555614728849	13.3326060074379	13.6355447477244	13.5486029774372	13.6195105928868	13.8794323968638	13.9918795467811	13.9320439103572	13.745167386479	13.2385406024436	13.4887837389267	13.4448757835653	13.7115876302438	13.4022507340356	13.9489128022442	13.2539672100862	13.74995965211	13.6975591655903	13.5566389073734	14.7045101534123	13.9364701586803	13.3358455204204
X2.09_341.2069m.z	14.0062235410088	14.4760307623622	13.9202688217006	13.4697404336196	13.6093407770651	13.6480172733143	13.4933103148944	13.8361751477169	13.3012450502784	13.4626011474781	13.7994974950573	14.0399102074979	13.888955959388	13.685694972167	13.7091773404944	13.4441419295754	13.5265458284617	13.6665211759143	13.0651111652482	13.5856066328121	13.323010420848	13.677387565664	13.424849072798	13.4526648110456	13.9897743562187	13.9593560354784	14.0214919649016	13.7603963937696	13.2076020531396	13.4333436526469	13.426899548431	13.7611485789488	13.4168783665413	13.6672188176443	13.1567649721982	13.6919159022488	13.7434556429644	13.4588070073601	14.705276743063	14.0322589254943	13.38268815536
X2.09_353.2159m.z	13.5331958525558	13.9893412432733	13.3542835248975	12.9383967044346	13.0780980954723	13.1829775690379	13.1641105915127	13.397207540718	12.9007962620248	13.0407056997613	13.2970525700495	13.6004500496156	13.4515033449955	13.2500862858486	13.2129396230202	12.8941605669595	13.03906535548	13.2893620751726	12.6189975845597	13.1064237428884	12.9051891564909	13.1269428410381	13.0542812379689	13.018256893495	13.4525704140297	13.5669605202287	13.473982284267	13.1606618356767	12.9281866405409	13.0448246801249	13.0389215634535	13.3580226943253	12.7504694603712	13.0992025911748	12.7740375264314	13.2079187862584	13.3098482021501	13.1289956148722	14.146494797975	13.4009959056224	12.9371710663145
X2.10_296.9818m.z	12.6864148278465	12.6120677672722	12.7346607098576	12.7798707074926	11.8490261163995	12.7752181124502	13.1515784851501	13.1037775536687	12.8061535005533	12.7451694492176	13.3892983038684	13.0927007242667	13.4572742648262	12.7880068388356	13.1307267126761	13.3130114941658	12.2793888328791	13.1530288668901	12.8402434863117	12.5202079720226	12.6150486916724	13.304835259645	12.8882338725649	12.6857105066936	12.2242686659865	13.386641719987	12.1746942357275	11.8804242013107	12.5649057585529	12.1510312945364	12.4502374163821	13.2763041720633	12.8912733342198	12.6414566610452	13.2084619237238	11.8581535442233	12.3459699837709	12.5772621629554	13.0356479593425	13.2114378297984	12.4160363059286
X2.10_337.1849m.z	13.9716451551144	14.5218002510459	13.9265152275874	13.4152234950157	13.4668004456611	13.6972993450426	13.7030033028573	13.8329913528796	13.4967862229191	13.6928278288624	13.9061033340706	14.239208302296	13.8949395839273	13.7231701642788	13.5616086083872	13.3914285241961	13.6325723529069	13.7227131197373	13.327512497251	13.5591383594166	13.4497320039356	13.6881289455207	13.5541446265188	13.5200537291325	13.9938424260045	13.9892478759391	14.0268777526692	13.7600233167978	13.3316820534944	13.5684182066994	13.4662369721672	13.8201100620879	13.5557242611671	13.8226591556639	13.2449092513783	13.7034768653415	13.6823812876746	13.6121003186404	14.6249751923251	13.8887969913067	13.3872819216607
X2.10_281.1220m.z	12.3426166812713	13.0929124914292	13.1359035138184	11.8287067077234	11.7751772560782	12.1592834648555	12.1997679738831	12.2619109138377	12.2003230694843	12.5796198929123	12.2737586292737	13.2633368941645	12.2532732728479	12.100183123477	11.7970674124516	11.8752682817983	11.9340404690642	12.0598937309427	11.9869097849949	12.2617175021997	12.0448699059074	12.6436158553888	11.3086438783234	12.3492657636764	12.0252517002409	12.0722613521761	12.5849394293659	12.3039656934126	11.7643058356066	12.2610900138593	11.8307023912244	11.9976877655466	12.4006338433994	13.3836284733632	11.5356037792062	12.4233226734514	12.188330620593	12.3876651882553	13.4815855466869	12.2458262822679	11.1613715518936
X2.10_199.0428m.z	9.95168114363824	10.0043517268202	9.45079844655386	9.60349094260565	9.26665368276878	9.42174890741256	10.3357420369897	9.6474567572808	10.0279412567815	10.1557559139935	12.6808730879881	10.7792757965676	9.02750718487119	14.9766675408281	9.17012228567921	9.09771956624171	9.57591487534037	9.71639155799327	9.34503865145478	9.52009716686389	9.51193447671212	9.3615416691354	9.39094639193638	9.51347322180269	9.57136874222344	9.34203929398316	10.9977164385833	9.91324842453639	9.2481623715282	9.96137838213098	9.89507620356676	9.04942579931204	10.1786818461254	9.91987981099277	9.33022556663884	9.65915455000285	9.85782753548373	9.21207779883513	10.2711758835278	9.5009491720347	9.27804959638684
X2.10_335.1904m.z	10.7487034693503	11.2542154686603	11.1570287705367	10.8163501630194	10.6510508264101	10.7830450012285	11.0146102612948	11.1416519208511	10.5155583814484	11.2139631765391	11.1018469086227	10.9515080332973	11.1491173710409	10.909297200166	10.9804722027681	10.9454384254565	10.8581618432628	11.4769131186069	10.3865573320866	10.760170253486	10.6998508994137	11.0166613285147	11.0118143174841	10.5886487088787	11.2686765010984	11.1948620617486	10.7543782701611	10.7830391450841	11.0635449611412	10.7900117589697	10.700831371604	11.2798699744265	10.6723068709523	10.8177794395033	10.6338719055606	10.6065593441006	10.897561118834	10.7364303345826	11.6153742568183	11.0383236656918	10.4852022448279
X2.10_339.1642m.z	11.0732044105105	11.2749178650889	11.3821955891277	10.6829413769912	10.6957319692298	10.9859600319121	10.9544878395848	10.6469734736838	10.8782544058443	11.001170873751	11.1348642551539	11.362372216977	10.9458775184053	11.1554288158543	10.7136636639261	10.8755431728063	11.1665886972365	10.7915048409179	9.99619876606605	10.6552666253923	11.0539069260211	11.2623389154036	10.5699883802683	10.4470118829531	11.0772555235306	11.5284568919045	11.1084965310009	11.1885668258049	10.8775972821741	11.010707831274	10.4849437296718	10.8710016177554	10.6743480989878	10.8418207570127	10.5651769905996	11.5725126165223	11.2841884544365	10.4484102679641	11.709562920879	10.9397290000843	10.5920493281069
X2.10_363.2216m.z	10.0142787881383	10.3421794019687	10.2110308931936	9.58153905338915	8.54702404062684	9.50376262942228	9.89682436246333	9.27079577015733	9.24392413903762	9.76625899136251	9.87072030261298	9.64830858255161	10.2211859664558	9.47341249684381	9.57536740898771	9.47797707876673	9.12316815963068	10.0568902770612	9.56405877523161	9.89328830741869	9.653555471271	9.19856353916017	9.57297876310961	8.62963904111164	9.3212130646561	9.53803704924865	9.99230302021092	9.371066354922	9.72891255430611	9.45925629267683	9.62078983131189	10.1832939919153	9.18962053550423	9.47760043228283	9.97730929771718	9.96696084079757	9.53081866999355	9.56654282147805	10.3045053667461	9.33630766000377	9.96762942180535
X2.11_904.6199m.z	16.1920229435814	16.754070246824	16.5252030768442	18.07502550445	15.2970537877844	14.3922732536273	14.1426157544887	15.5830234734472	17.5902164093627	17.3072086390376	12.0761391132725	12.5617958653056	11.8832594099327	11.6040534834697	6.79618657870547	8.9532412648481	16.2108536207302	16.5762427851465	18.6329739109696	16.185434084789	17.4808783167766	15.8657983663673	16.8504998255246	16.6924082148782	15.655560445731	16.4638522689263	16.7532184152616	16.5055492063598	17.866984205537	13.1570397625464	11.3074371066418	10.8138242692864	13.2452909971189	12.8835223733604	13.2172156773577	14.3425209191747	11.990207310741	13.2147594777818	7.0370124893855	13.3000833241998	6.68991317935054
X2.11_341.1796m.z	12.1817455009038	12.7777459486045	12.4303476770086	12.0094690185178	11.6263307123994	11.9832638763144	12.2563759411179	12.0974344377148	12.0254498888033	12.3696529859512	12.3217475997564	12.7320695517712	12.4234799305435	12.3445860480098	11.8461558935297	11.7708121697893	12.3461427109452	12.1462734884602	11.6362682413856	11.6857528044986	11.9146192895492	12.299402445242	11.75727901063	12.0153717860438	12.3892199892871	12.7541670177614	12.5059020923271	12.3632621948845	11.7431126367866	12.0534631026115	11.9779932640004	12.0464379769628	12.0690033499644	12.1675375579743	11.4511745724134	12.5433798242692	12.3739328367157	11.7162574970562	13.0054497773428	12.1407773313697	11.5676678560519
X2.11_1265.3595m.z	17.4948348269364	17.6901045542468	17.3745232303189	17.3950604133635	16.8325585498261	17.0531093511929	17.5781489122013	17.6367876384703	17.1320384221978	17.9057629078134	17.8716850240823	18.0324944579298	18.3540189972366	17.7092415497364	18.0967258587438	18.0742843899258	17.3090700333865	17.8802106832578	17.4718755086767	17.3329023000775	17.2785091697819	17.7199521187863	18.1761627260432	17.182949225965	17.7065677031271	18.6173611905409	17.3373046520619	17.1085352115068	17.3803838154315	17.123253382717	17.2473337476815	18.2641180709582	17.3553065559919	17.3908902136227	17.5742089621173	17.4048858165019	17.7865760748315	18.1525212237852	18.0361744996363	18.2403103402463	17.82036667366
X2.11_643.0767m.z	11.0851539070462	11.6108049946704	10.6366678032811	10.8785333200506	10.1007454907754	10.918260158626	10.6001651215206	10.9339149930655	10.5497902769097	10.9183589755925	11.3617569413256	11.3380886981754	11.3152114592276	10.917917824495	10.9268320485679	10.7258983543687	10.8676946036959	10.5381665205791	10.310611467682	10.6128392494308	10.926870337526	10.8807852666728	10.957082735951	10.0666149695432	11.2394407538925	11.0977612860678	10.6984799053735	11.3227591506503	10.3689766973472	10.7472249965348	10.5488949905459	11.0164007381009	10.6973489838166	10.8941436902609	10.4746603829853	10.7570947156585	11.1054644800568	10.7463240920715	11.6233923254338	11.0467612504114	10.5015024234827
X2.11_495.6630m.z	9.6794856464262	10.0143137081026	9.23789097538221	9.53025942470606	7.02906735165529	9.64893862560075	9.58048255287608	9.28617475527525	9.34358486013918	9.87178092276374	9.93181612029628	10.22594220438	9.88356766126224	9.46777342772364	10.5005380747424	8.41690199745374	9.90352090307497	9.5473876085427	9.90719084926925	8.04062711235327	9.28340798661114	10.1640399635877	9.18300978380409	9.91211616240417	10.0405106391599	10.1217969148471	8.47176798814439	10.2813671234174	9.51480443717715	8.46652924400349	9.2618774461195	10.0539463198649	8.27098414752901	9.45486885855697	10.1794762142179	9.45424241641723	10.4087575821677	10.5955285611014	10.3324394114822	9.50412690713954	9.94259842478202
X2.11_321.1535m.z	9.12754879762234	9.89889733532474	9.68077649946849	8.96010058853954	9.09746584150644	9.32471939220172	8.56081912979942	8.80216668351825	8.53636651627741	9.11744837464184	9.4363948771788	9.75595393702162	8.95349845425828	8.97226731764211	7.38654080075681	8.85846309646979	9.63310638931428	9.11368292072721	8.49880145654368	8.7301372342912	8.8594153355093	8.47866355474435	8.88199074307738	9.24600869792304	8.3355913581356	8.60600085435308	9.46858840056751	8.90912850795523	8.80181236732614	9.45138002666724	8.76107996851648	9.25431696668621	9.18907491313147	9.94384215230391	8.21026915901808	9.18958188939382	8.90223780351599	8.12898337459156	10.4247985237606	8.64793179717367	8.36827384455591
X2.12_529.3060m.z	13.8640056930038	14.5095965190682	14.313028480492	13.3128289377422	13.7648733730599	13.3401416863252	13.7251901130815	13.5774405439499	13.2717231287008	13.4345511019186	13.8951780010803	14.0443226577311	13.8371332189285	13.611076178478	13.3868084668088	13.2275568512405	13.7962059645318	13.8966994324156	12.7096343515829	13.317489806656	13.1863342134762	13.5881269487156	13.4810957775078	13.3608582426977	13.870542796247	13.9384361579273	13.9362870582565	13.8303041589996	13.5143215568911	13.6541638113309	13.5250474542894	13.545801756384	13.2575693431694	13.8418983335741	12.9224083706522	13.6991718273129	13.7806630904748	13.3438119090079	14.612310047941	14.2430760600903	13.1686696915172
X2.12_521.1493m.z	12.5084867989141	13.5517517651637	12.3643539304538	12.851914745867	12.2642952976331	11.6970155184276	11.4625325282467	11.8329556602282	11.1621539298599	11.8635176098323	11.8999744878811	12.8936656895647	12.3055310478367	12.5337963999684	12.1186752920282	12.2556114579367	12.3272504334698	11.7841642271777	11.3322124782494	11.6258420878236	11.6013012452478	11.5450140277716	11.772845647265	11.8711993780993	11.7732896224551	11.6784626866393	10.5064812515326	12.4288282396572	11.5621620209988	11.808600228192	11.4917612043277	11.8262234931907	11.4647938357104	11.5398247492077	11.1749084113709	12.6877798018027	12.1046569712295	12.2879140057279	13.0700115197329	12.6885931366416	11.6980027272123
X2.12_1195.3544m.z	16.3591514452803	16.4534515421813	16.4129089695532	16.4003085946883	15.8413515922844	16.0153380300716	16.3358466532979	16.7413628277572	16.2939756099528	16.6401910801387	16.9680235286694	16.9980230058594	16.9916425137549	16.8618743599045	16.6481656165356	16.7931660825557	16.2138998177778	16.9207445528733	16.3308733894069	16.29743949646	16.4649194289196	16.5357177952056	16.7056762263075	16.2225731239976	16.451813106263	17.0467790074439	16.0091358236284	16.2085830727208	16.419797808082	16.2517194356987	16.5273408336485	16.8743667936358	16.4298869446399	16.4101259058488	16.6987398160168	16.4077191802348	16.8012977375441	16.5478018240193	17.1745197156976	16.7262226870445	16.5974065130501
X2.12_1085.2746m.z	16.0408273729565	16.1913252391463	16.1464071683815	15.4499706171668	15.5278390121839	15.2689306278564	14.8905950197634	15.643049698296	14.92476912188	15.0697086343137	15.4052537218514	15.0521321813324	15.229843782232	15.1255939107764	15.6034558498746	15.0599108200249	15.2680531087155	15.4826113991659	14.7613329661612	15.4133700297524	15.136224505608	15.4772083065047	14.920549737256	15.6360998834437	15.9723400488003	15.8191113830862	15.7144602816669	15.8741102472839	15.0504223854122	15.9363094776404	15.2633893620103	14.99194210666	14.6878259928899	15.0872823157472	14.7317060340687	16.2173254472948	15.678518570664	15.7514417332033	16.068163854525	15.45354711918	14.9228197516197
X2.13_678.9972m.z	13.26118018679	13.0681846170084	12.7644943390119	13.3100465094505	12.8214795253288	12.6824483199858	12.5034997264234	13.1150260822738	12.5694039863284	13.3020105662034	12.9510810787668	12.8934564899331	13.6480275316477	13.2918157166546	13.4758668310477	13.4316906796893	13.0559874942496	13.5245275353821	12.816921463266	12.9962944399556	13.0590319608231	13.0114285097868	13.4069693329084	12.7715036137195	13.2289783351264	13.5983205115512	12.9799822989391	13.1167616941468	12.7847567594265	12.9899643547386	12.9492000051328	13.656726477707	12.7690506945793	12.5183704689108	13.1767294589867	12.8778777765964	13.1586196308039	12.9496561057901	13.4960084857795	13.8039195823053	13.2676942068755
X2.13_845.2637m.z	14.3239749504309	14.6877272517839	14.0922195645608	13.5798661874664	13.5269930488471	13.8894957989478	13.6481554924891	13.8882348778177	13.3961165019802	13.1950743292102	13.8301076468867	13.4022564637867	13.6829584202209	13.0583129915304	13.6949770790403	13.2492131513479	13.4566383409763	13.5880648179043	13.1135237677792	14.0088350215863	13.5649826306695	13.4164453558188	13.4084778002399	13.9788282018371	13.6478614400089	13.5783608292113	14.4819232014654	14.1442597856211	13.4145489881042	14.3076643055027	13.8966077423143	13.8898698744879	12.8567237389649	13.2737194997949	12.3081815119308	14.0822128112882	13.985529139678	13.6884135893791	14.7345627896741	13.7815977929299	13.3914880377788
X2.13_443.3255m.z	10.8391506279164	10.5533958026196	10.3214621585556	10.2099596769982	10.1363061818038	10.1355302937066	10.4763400338335	10.2919450943296	10.2487471208156	10.1072280940619	10.5659453323474	10.742188581294	11.3481637062538	10.8848292352545	11.0273307546819	10.6945726680944	10.1958781855132	11.2355882660056	10.5459675021632	10.2948234070647	10.6217081184703	10.6631546674917	10.9865932722938	10.1875550288759	10.1190092437728	10.9254909130365	9.9040209981551	10.6859913413077	10.5275558316046	9.8044722529983	10.249002092165	11.0303884980557	10.5007141582803	10.4911504773819	10.8041146598735	10.0125216209809	11.1422042097558	10.2466485626735	11.0112503167652	11.1625285767098	11.0818140974979
X2.17_428.3204m.z	13.3362620192988	13.3864832074635	13.0339590333215	12.7868492664697	12.6692740306417	12.9762263174842	13.1037580003389	13.1220763514568	12.8045274138125	13.2875649375144	13.1936537737362	13.4107188442644	13.4720863283494	13.3743549999686	13.3811827643291	13.1338126837849	12.7367310773157	13.1794648478478	12.9690731870172	12.9914243698663	13.0953016263667	13.1611831833054	13.335268191594	12.7717874053028	13.2296055627846	13.7201513694982	12.9786240895109	12.9322892833209	13.124909062308	12.8158109645049	12.9889001678145	13.4376630194788	13.0623692465815	12.8605025585594	12.961251359968	12.7715967096134	13.185226779107	13.2956392180003	13.9558195965914	13.5488865020656	13.2557981807435
X2.17_607.5550m.z	9.35991310766035	10.6116147513573	6.72582652749642	8.94838721216699	8.80766458441846	6.5945101051618	6.38726394970373	11.0696208527433	10.7058592901569	11.9144861859535	6.88256407671876	6.80403010396058	8.31707300397502	6.78675947015249	8.34221646131638	8.4794191061554	8.78411518125396	7.6129479323418	10.3419410061834	8.79687317982905	9.18175770607613	8.45594530062598	11.6233383382036	10.7951480453568	11.255386667364	11.4068443286619	10.5137501979111	11.5333481890134	10.4586839155712	9.69295015565912	8.5119774759183	13.2856972783122	6.65043641828236	11.4371452239648	9.36342955585802	8.01864314284829	10.450809081742	10.1306689322988	6.9721842760746	6.78522469893167	6.7055813455636
X2.17_952.2683m.z	15.6316834805118	16.1740746303401	15.4725927161138	14.8272301883446	14.8650537827846	14.8635971148459	14.2592695591694	14.8878685221551	14.3005541037036	14.3771333450116	15.2030056405929	14.847726834288	14.5874049368034	14.8196872159161	15.0071221662489	14.3767902730437	14.458250044208	14.8086588773223	13.8103613637734	15.0130890292988	14.1613770333129	14.7246850094021	14.5191433384058	15.0227882415061	15.2566080342841	15.0595638090011	15.2489899615837	15.5734651800371	13.8819680652168	15.3014583175813	14.6157600730974	14.7118549166526	14.1932835083271	14.6098127621232	14.0523298392274	15.326025729088	15.0192555401214	14.6972010481685	16.0791820222973	15.4780753715735	14.4492473463062
X2.17_656.0050m.z	10.4389028430592	10.872625777178	10.1339015598175	9.82418026874889	9.60627918759937	9.87068737118765	10.336265204614	8.69465034122748	9.40301371820673	9.98420125423857	9.95405659578354	9.99764926396114	10.7038380910805	10.1497019137318	11.1075347299501	9.60019091657154	9.15326285301278	9.66771483435296	9.36991824380335	9.23957938814161	9.54216019708606	10.4042548192301	10.8673971359067	9.25404886694138	8.75131087330449	10.9158265276062	9.74923678097992	9.92136948690239	10.1270402936172	9.07494320128739	9.8307441399249	9.72885245463122	10.1808510122822	10.5984974922858	10.2083331229492	10.355428831221	10.1289860990177	10.3828141728927	10.6426041333496	10.1920769460598	10.9017193780146
X2.17_326.4881m.z	9.81092043506105	9.69294377788857	9.04319112671163	8.74136138438352	9.28925919401238	9.726060884222	9.27371936338842	8.95189970940332	8.96043070171897	8.7369469279955	9.46812218085756	9.41820800810558	9.72908134372886	9.05430359658715	8.92970659668799	9.02323243574224	9.00198448115943	9.8129902812435	9.07244395305133	8.85172989803671	9.67094227428591	8.71773315220238	8.89591863044158	8.91533843659141	9.24124225964852	9.89412664738295	9.14614980889566	9.09489512489272	9.24390947607052	9.41334655175685	9.19062879556214	9.65200984613551	9.60301382122324	9.00822990108442	9.44699831640061	7.98664951020765	8.6225360836287	9.68454002912343	10.2641609434992	9.50106209830408	9.2471355280029
X2.18_328.9835m.z	8.45215077707009	9.68670955980209	8.78294627840278	9.28825728902017	8.83064269761092	8.5555678586095	9.19787155987556	9.44583969428649	8.19293210622202	9.09947273662498	9.66700161668088	9.81796398023877	9.23275317716936	9.01466508397831	9.04896272256253	9.42678490045451	8.58299034641904	8.45760445568414	8.57950760741726	9.73429536881662	8.22591872090032	9.16432869811354	8.22602912296332	8.9127489600771	9.21941129268156	7.92726604025028	8.1649265898018	9.09835825254808	8.44187423346517	9.40527360055691	9.55318500793958	8.59066551468911	9.23292477889512	9.08953096988825	8.85503024159145	8.8780190842853	8.5934658137874	8.01993247064038	9.83008848288186	9.61742555655196	9.11476611303199
X2.19_1085.7737m.z	15.5546654435347	15.7539900184963	14.8857414665916	14.6705583907522	14.7789756930155	14.8078144943967	14.4925269520114	15.2666509054304	14.4557554565313	14.4992692474106	15.0123004729236	15.3536317782532	14.6909697669086	14.4560968348936	14.7175193691951	14.6711349062587	14.8115042580016	14.9437002921532	14.2696696723366	15.1940813179588	14.7458887472621	14.6770297385182	14.6250160146166	15.135843710661	15.0805328807775	15.0748618640809	15.5793422396044	15.5587380780642	14.4806256025992	15.541849758139	15.3229522872344	14.6970228683777	14.3508337617107	14.943253315769	14.4193887548736	15.8325756792931	15.2784653190041	14.8183162585375	16.0757653517922	15.1378535621293	14.4682262793267
X2.19_1333.5269m.z	6.66199182005145	9.91435027898566	9.24048768602013	11.0598418686234	9.22749547756754	10.3454705888473	6.61722069229143	10.3500735683217	9.75492780793934	6.72957687576215	9.14158183419677	6.85022976437038	6.89402004792767	9.37718203039652	6.66234092507865	10.3962358794864	10.1824317881114	10.525268588779	6.46200041658777	10.6042914642931	6.4189632346856	6.86908356747764	10.4233239428555	6.34745716671932	6.75340198359772	9.97883492960328	10.7282504673785	6.59078349514171	10.6768715903985	9.48033471675306	9.54662464739679	8.96691013321088	8.62854494767938	10.5527609327633	9.94257492020924	11.6113647229775	11.0923884845838	6.60359013103014	7.14978184618282	6.83059079346001	9.05857696539251
X2.20_1048.6628m.z	17.9004113983899	18.562109704301	18.956634905286	19.4853284313154	18.4453243855124	17.5021660585505	17.1718368346745	17.8902097091985	19.0072094258543	19.0860525926955	16.9769452901718	17.3406263116277	16.8823539676308	18.7335749541319	18.1914658549067	18.1567171326655	18.9811141424702	19.1139394433072	20.102493200631	19.0826131860473	20.0844475404252	18.8626580796183	19.2025892611005	18.8377326444597	18.4500728151853	18.219195208425	18.5840343241653	18.9996123138758	19.3593285131716	19.1817276741988	18.4909924730044	17.0389063137902	18.3690501333714	18.7632559277673	18.2813429196204	19.9428663456553	19.2061960108981	19.1491182554781	15.0427048356895	16.3899138112452	15.7202283608417
X2.20_1194.0236m.z	17.8657629738853	17.7006099825352	17.6106181406147	17.230437768422	16.832560905839	17.2125751430812	17.2630377195455	17.7585739267835	17.0581982065461	17.4169665115138	17.6481769253826	17.6795324397355	17.94039957474	17.5500165369117	17.5315893321833	17.5886678263867	17.2396568682369	17.6718371876392	17.0035376759826	17.3866432168639	17.4294642856529	17.4529722451542	17.4443735170845	17.114736669886	17.5140618677825	17.7153295547171	17.3628742444307	17.4138094243565	17.180199962738	17.4824279586433	17.5387798784222	17.625669314067	17.2179971061769	17.1913329568634	17.243053750422	17.6214684285946	17.5693751506328	17.4711247880065	18.3047679279212	17.7441450157184	17.4028109601326
X2.20_1085.0252m.z	17.6898213984705	17.8997495153303	17.2258807770418	16.8824883867434	17.1754952220553	16.9283046052744	16.5421907366289	17.2928851743789	16.2259558732188	16.5006131711149	17.2806790372601	16.8673063782032	16.8969478542509	16.7885794640547	16.8527467927932	16.4407253773274	16.8292949159273	16.9934703825323	15.9521536639845	17.0675218597361	16.77781993773	16.7481042877405	16.432517099175	16.8914242221256	17.3595974782466	17.098336966219	17.630471637391	17.556259802602	16.1596396593955	17.533047289896	16.9864240201902	16.5688404993115	16.4554887990901	16.4246127892803	16.0254859126267	17.6608374208488	17.3735178862213	16.8244945617757	18.0456584265647	17.0565426908026	16.445982620244
X2.20_976.0199m.z	15.5060292822575	16.1540639291366	15.7728514014641	15.1751127365738	15.3029645739669	14.9206393512389	15.505829392783	15.4662472685012	15.4064372340562	15.6987244470765	15.5184330696831	15.8187168847597	15.9880491049793	15.7555375842862	15.8908256352347	15.9220545350791	15.4597961612322	15.7598994617752	15.5839733935231	15.4523880857495	15.4437206586216	15.6281738836855	15.8058645862996	15.1974340564717	15.7490503417089	16.3396688468245	15.1708918797823	15.2243168655986	15.0924856250724	15.2088925272167	15.5479044364832	15.9185506436687	15.6180699577045	15.3224241186958	15.3110213642116	15.5440976173476	15.6498405060462	15.8943774405802	16.1864603691296	16.0499387075695	15.713134526395
X2.20_884.0171m.z	15.2476481622167	15.2965821780776	14.6692635141842	14.2451976584998	14.7227804311444	14.0845941663356	13.4927762130674	14.3860231869328	13.1111025650671	13.1161168074124	14.2277221827876	14.103997359024	13.5427576995689	13.964120662378	13.3768078295223	13.4183787300894	14.1376479961126	14.0650808164843	13.2876207415127	14.4606967455036	13.7005126603714	13.7681143694124	12.8516824661189	14.3443286014047	14.4170559267681	14.0567167404512	15.0643028949597	14.9803407067283	13.4613156314307	15.2635279116993	14.2973704979167	13.3760538870971	13.5867791625375	13.6657096358927	12.6539994217892	15.3914476945878	14.910429378673	13.4802779067625	15.2725600387664	13.8348519766843	13.5490261619984
X2.20_833.3476m.z	14.2460971922273	15.1555653655014	14.25073949597	13.9177851522296	13.8482631333257	13.824754521402	14.157333089114	14.2824594659857	14.0679743231081	14.399916078081	14.4448101677692	14.884199171853	14.920123371857	14.7747948266767	14.5716477899164	14.2382087368622	13.8566327859005	14.7763920110845	14.2133858889472	13.9316949322995	14.1878491563621	14.7611130066104	14.6014734245218	13.9447891406567	14.5294735451587	14.8868657263844	14.0295713917825	14.0340677188266	14.2123898035341	13.8900445931491	14.2327366504652	14.9806734560859	13.9426234930567	13.9022318021609	14.1963402988141	14.2225127520032	14.4506048050746	14.5254714521286	14.887743086442	14.6051073337311	14.3443799869823
X2.20_948.3385m.z	11.4012977521618	12.1777648881793	11.4433137741361	12.134781275397	11.8233758148549	10.8096424082023	11.9971179157364	11.1458153256054	11.2723153108838	12.8223066242545	11.7789149744724	12.4169196435075	12.2795968027377	12.2710120023133	12.3400860139712	12.6748236096221	11.5669737418685	12.1742903935922	11.8024316161936	12.080536046306	12.2338838996349	11.6829582796228	12.4607755493471	10.5527479467972	11.4752524987342	12.6431473580111	11.4125998556646	12.3544100653884	12.0986959597445	12.139236539421	12.369543997334	12.3823837816846	12.3121165357891	11.4044853218829	11.4501990206332	10.8697938250183	12.6192878561499	12.5750813031062	12.454926533294	12.8359448310397	12.6290321301625
X2.20_478.6608m.z	10.6228340176767	10.2877187854753	10.3869210987663	10.9798567715685	10.4000741907636	11.0569196365726	10.7357725546469	10.1720738465444	10.25877463955	11.1281279093049	11.3247787925765	11.134091829879	11.5445179553177	11.0212287857427	10.5377595256578	11.6181502816659	10.7514479603263	10.7231275291592	10.9205873801316	10.2645403739303	11.0577408155669	11.0372120067294	11.2549024039919	10.5401745102019	10.1816094819472	11.3605133237137	10.3093486513801	10.2298652376807	11.0429593795099	10.4367347046054	10.3720006051865	11.2963508389733	10.6904662664214	10.7465263579388	10.4758781634763	10.9844324027798	9.91802595154931	11.2868733241287	10.7307271470584	10.8571105879171	10.8050180651522
X2.21_1139.0246m.z	15.3720234022924	15.5027662250463	15.225630224067	14.7921454171218	14.9480647289506	14.7740434707953	14.4823464092098	15.4294409853348	14.7215579679049	14.4913522160252	15.0261817574163	14.9543583877078	14.9894191127872	14.8725744920649	15.0306039152296	14.5674812134227	14.9591142339452	15.3993623905462	14.4927829568736	15.328931064472	14.7574231122769	14.9131764469116	14.8079037867212	14.9813699225871	14.8780497527646	15.6048726755924	15.251441172135	15.5137136861692	14.6519345006908	15.4406388108045	14.9094857642248	15.3857008909909	14.6482132081887	14.8918568446339	14.8595911942113	15.6953427995263	15.5389204062991	15.5050469371744	15.8534527098642	15.1719216115101	14.6637684500888
X2.21_851.0101m.z	14.7178859120199	14.8887896658871	14.6596096531307	14.3062148385804	14.3427134157198	14.3027372338316	14.2127608968574	14.6306934010302	14.3126903486763	14.3106255605269	14.6461853266717	14.4522367056405	14.7459143047116	14.7759634415147	14.5401435280629	14.7200213404349	14.4014768098557	14.0809747595307	14.043570452084	14.8415814781668	14.5703845715081	14.1232086231522	14.6971192622126	14.2513174426002	14.2581927809873	14.4817511409001	14.8088639170185	14.5169271115168	14.4572216541329	14.8754790408456	14.0818407427159	14.6924234992285	14.2474095423712	14.1580743351478	14.1875348067085	14.7833490059493	14.7041261731431	14.7336451353477	15.5508699142961	14.6947047546537	14.4534732304243
X2.21_549.3323m.z	11.2427920876413	9.88842385104296	10.5781833887369	11.1499149688798	10.3592269690324	10.142238234612	10.5307908926428	11.2269444964725	10.5111486677358	11.1595624623877	10.7134195358488	11.5505565925254	11.2915748747798	11.3399216608352	11.2271961457493	11.7437593847962	11.0822888526049	10.6729451092825	11.9301535715818	11.0766332991969	11.4816854283239	11.0781358491865	12.0249779121774	10.7644718426408	11.7992107326829	11.4829936284654	10.7902929985404	10.5512745200135	11.6036383436929	11.0055015278994	11.5144779721632	11.5042379834397	11.3649056830023	11.6957194676392	11.2576996691085	10.7176730380208	10.9498774126146	11.4971624364505	11.2684921808131	11.8101701056519	11.1259990359505
X2.22_994.6152m.z	17.5542788480985	18.0433700224636	18.3295214043947	19.137654620631	17.8277462644332	16.8241964960877	16.568179220859	17.6281840584859	18.9053862388275	18.6137722896159	15.8781808220541	16.4457737631287	15.7842339277157	18.6612007296893	18.2469753099875	18.3385048689652	18.6539741180976	18.3916418827979	19.6471260153387	18.4910075887055	19.5966540044631	18.306339189361	18.5611710121157	18.6433727376281	18.294975854076	17.6031594496469	18.3730636546705	18.8932120158247	19.0647792930604	18.2459961170504	17.5868227311586	16.627855264851	16.9845258271319	16.9361657018131	16.7337523714815	19.2633657049328	18.447920425824	18.4665757885669	12.3898072959106	16.1571225263375	15.856480775074
X2.22_912.5373m.z	16.0296411143949	16.5042680602135	17.4894392999367	18.0776897804128	17.181061196077	15.9746432565486	15.2822449042062	16.299139897899	17.9066949890898	17.5856054264836	15.1854568868042	15.7161647389109	15.1911383581615	18.9861003441416	18.7491246025181	18.7668687071662	17.1127031552137	17.558373212441	18.8400008852953	17.228748797713	18.5288041330688	16.8450341733047	17.1085788035804	17.3628016581883	16.3030644211678	15.8202133760933	17.0236896876942	17.4385537887033	17.7708659685862	18.7227529299033	17.9931153285981	16.0799860086435	17.3572484019313	17.7787607031865	16.8563210065297	19.9255724281482	18.8476950404873	19.0428231147687	13.2495481544804	16.8535303222935	17.6680632916516
X2.22_1076.6929m.z	14.0096766901928	14.9977808183009	15.5581130193685	16.2233957098339	16.4767293255856	15.1786390774171	14.8970962491392	14.2669626908029	15.78395523478	15.6223770030006	14.266933141434	14.2075197943207	13.3256557057155	16.2045963011024	15.412536681052	15.4467056854757	15.693489993282	16.0205096560356	16.8152179486857	15.5107752017299	16.7817351038151	15.1967811566892	15.5849666770529	15.5244815259309	14.6100186904377	14.8927412137085	15.1501915342414	15.5844548322139	16.1231933322152	17.342533783263	16.4771634148271	15.8251371336836	16.659106778356	17.0488159937426	16.5640898408902	18.2811538769947	17.5716164040417	17.385935257672	6.87156258325892	9.83972156136181	8.59600922704969
X2.22_925.0146m.z	16.7622757860964	17.1506862822016	16.7740961307799	16.5580160573288	16.2388269508313	16.4287234217796	16.4375373520398	16.5971380436716	16.323753754013	16.6344259171945	16.7015738034747	16.6944577508835	17.0763530148158	16.6901837769286	16.8135433928484	16.813682276957	16.3732841937697	16.7320876131657	16.5463147728357	16.6711407970311	16.4807345637771	16.7556445539955	16.7992599822095	16.4091276625522	16.7971592055456	17.2003082589161	16.449251353624	16.6399124869247	16.4086014312437	16.5251685346896	16.613330196734	17.0024053369892	16.1987493796716	16.3706131144574	16.4961836940321	16.830186996245	16.8531632661251	16.7866033840935	17.2944610560872	16.8807079962141	16.5505683457472
X2.22_976.6858m.z	16.5887828008965	17.1553587912356	16.7512785052684	16.4868895636417	16.095599369744	16.4507146638735	16.5612774754084	16.6338865494873	16.5419183941978	16.907261277167	16.7998508523111	17.0449573623003	17.1943353146986	16.8747930328017	17.0320075458849	16.791153931657	16.4131289953577	16.925596856878	16.5286234543084	16.6255857634942	16.5143788660612	16.7986993982085	16.8710053841508	16.2571162412872	16.872124612894	17.3828786354384	16.472448816198	16.3749340474049	16.560094814955	16.541273289092	16.5858601461995	17.1652385595917	16.4797620141116	16.4459474939796	16.5380979879335	16.6335152527873	16.7412227203444	16.8760864653409	17.2614690848146	17.0582200406032	16.6371137778742
X2.22_837.2576m.z	17.7571586928383	18.0714237348618	17.7117090997813	17.3318162588089	17.1529539410982	17.4418954314953	17.6361322291435	17.7503062691917	17.4578719824919	17.7323750798041	17.8754938003432	18.1175891944715	18.3581191331366	17.8979236351228	17.9568651618971	17.7639814685599	17.429352687344	18.0036988549917	17.4639779824521	17.5572146558323	17.520592257516	17.799451038613	17.8329716087586	17.2817399229601	17.7378400128627	18.1910892353817	17.5818679576999	17.4765863575592	17.2818810258563	17.4047643902419	17.4650663946795	18.0245521784373	17.4728093522986	17.496574526964	17.5204754473605	17.5760482657466	17.7305087001334	17.7846526767727	18.3877305910996	18.1484945854324	17.6922487660967
X2.22_1291.0276m.z	18.7495863467791	18.657926244127	18.5837142834119	18.3921880217689	18.0252091815005	18.2316991037228	18.4746175114157	18.706665916872	18.2663011687296	18.5111070257779	18.7814219607401	18.9277554456384	19.0395861661502	18.759294492738	18.9109286288937	18.7053361953527	18.3347018169488	18.735297436099	18.3827762583975	18.5021592701011	18.5800172767121	18.6054102667077	18.791833932364	18.3126260419148	18.6842390840164	19.1293440746526	18.4912587787989	18.4681190310432	18.3603587290102	18.4429499887803	18.6539432655893	18.8688902802104	18.4132511914908	18.4305863839842	18.6215459131828	18.5568210489784	18.7439254387304	18.7822104670114	19.2886821860001	18.8421030644925	18.4612654715365
X2.22_781.0096m.z	15.1730867267478	15.0869066036181	15.0581341908704	14.5677569954044	14.2028405647656	14.5629194073851	14.8069430022402	15.2738422809939	14.656884736917	15.1363441744702	15.0450350626123	15.1411610580473	15.7269568551479	15.0459678711107	15.1938502441045	15.1724419671346	14.7318606407534	15.2643620763537	14.8020770809066	14.721344488021	14.7461950544799	14.91504933339	15.1090947496697	14.6032969064351	15.0100551718168	15.6077613270887	14.5576439418236	15.0275816508092	14.9030951005119	14.6262592215586	14.8484100499609	15.2148447855559	14.6197633138718	14.7759627731889	14.5903807904865	14.986009001709	15.1086878215449	15.4459620149302	15.03693440658	15.3947755137192	15.1539840821651
X2.22_1276.0336m.z	17.2077637804815	17.2685199005503	16.7224703943434	16.247649877712	16.5844129737566	16.2973831135714	15.8545060160843	16.4855680306719	15.5610099125412	15.8607196984146	16.4719868752136	16.2065792130793	15.9610300803812	15.6776537691503	16.3577297987466	15.7684292842818	15.8998728210313	16.2129660385152	15.4257660689411	16.537105014452	16.2516505983721	15.7143655905309	15.7541898458305	16.2480443683086	16.893215285241	16.3022407781427	17.2980172615315	17.0780322179194	15.5172057107175	17.0285601689439	16.4631809617078	15.3447871045872	15.5816976091003	15.6774027053497	15.5962550290049	17.3732911251327	16.9632820148001	16.1879261462098	17.3827175269065	16.1496426097553	16.0696056725791
X2.22_1184.7726m.z	16.765904850247	17.0283072783525	16.8262004926933	16.871377034136	16.2831709463385	16.4108276756927	16.7966761714469	16.9579618681627	16.5391890603092	16.8928722855019	17.1393687492316	17.2221760767821	17.5345488747261	17.132211414632	17.1890541995505	17.0918803059152	16.6753682727688	17.1169225665106	16.760008866828	16.8419975950203	16.9199108802865	16.9380307355853	17.1761975885254	16.5412773187275	16.8889783457984	17.4855890318825	16.6147572242025	16.6531206194279	16.6858551288862	16.6309807485384	16.9179520484339	17.1517175483917	16.7524544604207	16.7745796983371	16.9525326782122	16.6054466252549	17.1603272022194	17.1445308827765	17.4193837669047	17.2960861958873	16.8865014191639
X2.22_931.5110m.z	16.0104728117498	16.1581108540036	16.0110641344058	15.7300215105986	15.4788221426759	15.7538380212445	15.9558174140579	16.1269828230079	15.8111075555141	16.0697140649433	16.3039309214496	16.3783451324023	16.6050443671622	16.105624610197	16.2780656298404	16.1017107067824	15.7060540018747	16.2026582586418	16.0051989332928	16.1078966829534	16.0422665525601	16.1070347650867	16.1218382334186	15.7257085134608	15.9411676364729	16.5495661856247	15.8419336140575	15.667312893871	15.6743553996269	15.6074655095933	16.0115319735267	16.447126768354	15.9643698201969	15.8206757876917	16.1378402737074	15.6457110269212	16.0513700292281	16.1100294899508	16.492179368953	16.349908745764	16.0961325767592
X2.22_892.2574m.z	12.8789002737512	13.0087422547221	13.6970425168697	13.0627641996116	12.955619909121	12.4766474379869	12.8036375884444	13.3857366359589	13.0106199440683	13.9827357394495	13.2432581803463	13.4817065024317	13.9589458167383	13.4963170266214	13.289007274742	13.9149244291826	13.3775276381884	13.3937288681925	13.4169638496504	13.17240313674	13.3995160324003	12.7376151081337	13.5473623448266	12.8175320664077	13.4790701432209	14.2664050699581	13.3838351037616	13.4045790683099	13.3452997708642	13.0414480218816	12.9844994974857	13.7239004530914	13.0895186425208	12.664004332447	13.4157141055475	12.6683526813104	13.2960348046745	13.8993341067478	13.8525081671257	13.6976535493378	13.945276997536
X2.22_1292.2748m.z	15.2959176251593	15.2136179885813	15.1210225783815	15.6322894769631	14.838208953736	15.0923879386067	15.1618475952982	15.15938213756	15.2103454847452	15.5582804964441	15.5115841672392	15.5015449111204	16.0601530849837	15.771466867552	16.0563729863178	16.0287598483325	15.3373423683782	15.8558188880675	15.1244681438955	15.4485621815354	15.5818609497815	15.3975562189364	16.0068411554389	14.938697687857	15.105901481181	16.1608906652725	15.4652003991183	15.2437798408497	15.3045147106023	15.065080432721	15.355819500443	15.5835341146355	15.3646531716017	15.5201877634626	15.332471542076	15.2100647691807	15.7993258207513	15.9049147710386	16.004781575188	15.9690851519888	15.9767416624084
X2.22_1179.0276m.z	13.6689372782979	13.5237376140712	13.2987063949374	13.0146798343134	13.2198185414184	13.2796243140405	11.521780963008	13.3925450394283	12.4986743858226	11.4671579170005	13.0253236877862	12.2487470742775	12.6268963153521	11.7802181899362	12.6583513235707	11.8539148170212	13.2947215854845	11.9177449151872	9.41369156749392	12.8588027591538	12.3505792641895	12.0882114415612	12.7583862367921	13.2763652278947	13.2852813629884	12.5236474420459	12.9054004152267	13.6555199555854	12.4849067859634	14.0535174650065	13.7805229166472	11.9574303720248	11.9031613231991	12.3561461626566	11.4744451373239	13.9619882044523	13.7190285230601	12.5846231489387	13.903611910871	13.504033403542	12.4111016885178
X2.22_1395.5357m.z	15.0620044628334	14.7139724904703	15.1180521542198	15.1444600085341	14.6474209025653	14.9961678795011	14.5685462346074	15.0653297298848	14.8317634437362	14.880156400049	15.0895479743254	15.5749437293687	15.6555813731368	15.2391655305724	15.5486540498916	15.2671414020676	14.9358835272611	15.3086994743795	14.6890587293456	14.9506170110158	15.1793278805662	14.8760879718864	15.4646511542185	15.0444502623815	15.2415108125771	15.5106419697022	14.7154552829362	15.0704588714058	15.4010998731445	15.0077160103335	14.9092765566745	15.1418830346423	14.5802257242598	14.5958989857597	15.1375824801204	15.0782407493873	14.9566044879047	15.5017573907057	15.5292322820349	15.214467013403	14.9331959086938
X2.22_1073.5237m.z	13.943166413545	13.6547056484771	13.0614391629288	12.3804484914733	12.5195558006653	12.7656377215714	12.592698203252	13.1906022257401	12.7563887062923	12.6307534350476	13.6914859535074	12.7104913048472	12.9462277428914	12.3401148683522	12.5866717541791	11.8442537165226	12.4870013802346	12.6392865642814	11.2330165170886	13.1320298904069	12.7991327200118	11.9799124720043	12.0791274864629	12.9179974361068	13.3800954600267	12.8652390921508	13.3826935115199	13.5071868186322	12.8923544267758	13.067735790513	12.9181486164322	13.2303773745021	12.7897286033527	13.2177154933779	12.7507128817519	13.1303836888909	12.9883895180406	13.3651749517136	13.9553076287022	13.1563513929423	12.4647663600862
X2.23_1263.3624m.z	17.2164636401321	17.2730191079944	17.0151628644157	17.170146711452	16.7466294035652	16.9569547664794	17.0903431749663	17.3212811537941	17.0375576968328	17.2222529516439	17.699718029412	17.4217982110058	17.7550002732459	17.482932915737	17.429319461072	17.3773891006057	17.0147698763648	17.5022545298425	16.9265623059242	17.2022697171061	17.0858097526537	17.2700812808814	17.3499781732062	16.6830131115364	17.113392756068	17.5871622139781	16.9016850080023	16.9216892045918	16.852038252287	17.1276585241964	17.0189242187447	17.3992038499447	17.2410628462423	17.0484324007257	17.1385170798757	16.7925928896081	17.2705974201047	17.1940739737389	18.0147590438774	17.5397780209788	17.2231051438824
X2.23_1317.5291m.z	18.5618755546888	18.4651805675122	18.3981077831113	18.3640307218504	17.9558389725992	18.1963874243705	18.3981285947342	18.6018532536879	18.2335356960497	18.5659546686574	18.805724380046	18.7783543764612	19.0732875196385	18.7888957124693	18.8724625987966	18.823183572856	18.2913823562026	18.5927179505509	18.3443644327826	18.3948855997925	18.435376362131	18.6244102200477	18.7621916360378	18.1987668329028	18.4019630360259	19.1320604080216	18.273716994256	18.3024165386231	18.3596248512258	18.3377633365	18.4115959557224	18.8173916056355	18.4786108049683	18.4609260514085	18.6477936453448	18.3953185581188	18.5135127891797	18.6890425679357	19.073643021106	18.7619996979607	18.5871849252075
X2.23_1419.7898m.z	17.8140545826101	17.8089563819059	17.3785225513614	16.8847486268603	17.0107213767864	16.7993225951303	16.4255093584886	17.2011648891231	16.1177328395647	16.3393203369031	17.1922903785955	16.8610996792859	16.4985590131338	16.3453494346363	16.6192500433173	16.517280429361	16.9936796576166	16.8342932950221	16.0120111689724	17.1783558460461	16.7793609815507	16.5043025149477	16.1871475051277	16.803560517547	17.181295779458	16.9319285831817	17.7446784044084	17.8008541557237	16.3579737547624	17.5776109757998	17.030965346591	16.5327855072812	16.1460749850876	16.7877873208839	16.047583193553	17.9967900433623	17.3902482877202	16.586859306423	17.9085728641997	16.6053382578487	16.2293750188253
X2.23_1230.0242m.z	17.9136927672518	17.821595698165	17.7016146591645	17.6528572950784	17.0148435717369	17.2954282761103	17.3481744718541	17.8351173599319	17.2182790389074	17.7524230930172	17.9548275104285	17.9516328220551	18.0068177880803	17.7345180505285	18.0345093663871	17.8426445469006	17.4782840402898	17.8705815029587	17.4809621416538	17.7102463559228	17.6191292351354	17.655388753974	17.8547949821495	17.1092577446079	17.6965583873417	18.3369572714734	17.5625811555405	17.4957090736909	17.5098669325632	17.5326972151601	17.5165548729899	17.9082894490075	17.451296462315	17.2998727482632	17.4906276546982	17.6806848283051	17.8573381621308	17.802422285032	18.532696830097	18.1196226244963	17.7241181324599
X2.23_675.0030m.z	14.3930243560397	14.5584415863309	14.608179007079	14.102931838326	13.5104830363077	14.0944550864674	14.1218951566057	14.4453103141454	14.1216121181866	14.6180057387467	14.2308802431132	14.5665740237514	14.8406648842996	14.4769431382509	14.7144332127686	14.6898274396949	14.0987745877633	14.3685339134749	14.2008286561574	14.1199039342585	14.3444655661438	14.032876444175	14.6213976442222	13.962912080484	14.3632867989715	14.9035863057377	14.2503212856292	14.2089347482439	14.2093050386424	13.8881237987886	14.120461468146	14.7515530816318	14.1709342699365	14.4142507563333	14.2973062782881	14.1838509582741	14.4348289553076	14.7108154220668	14.7248973839467	14.671298328783	14.5571643725087
X2.23_770.2551m.z	13.2260674659669	12.5684572654707	12.9089143099385	12.4708974041735	12.7459885933986	11.9060640610268	12.7702115295791	12.8046293980685	12.5295312012745	13.0631939077247	12.6635578799428	12.7459284095805	13.5305317658195	13.015377443381	13.0288972050724	13.5520121923822	12.3478536720143	13.4016117365131	13.2282665462161	12.0423906421889	12.817068019934	12.8823314059687	13.5139367083935	12.6141604335986	12.6240581573845	13.6649746988371	12.7541258732456	12.09252068795	13.0004091056673	12.2471706286114	12.745410452489	13.7011180035759	12.8309624235747	12.8685035446574	13.2457837082061	12.6190774460719	13.2586516471268	13.6391161288927	11.7561025665993	13.4539630755733	13.5179902539849
X2.23_1024.7652m.z	13.7260786594428	13.5608394285381	13.6759239250434	13.7912549711811	12.6243930161246	13.144880308103	13.8259782315073	13.8548036530606	13.2714507795852	13.2797078844983	13.600416611885	13.3727617828942	14.1180402980983	13.3953792866928	14.231173692851	14.2469707726337	13.432961592947	13.401461515162	14.2701678426041	14.0365862068995	13.5236366519052	13.8620598174533	13.9247537409052	13.5324114652711	13.8037142834006	14.261784742413	12.8768856991762	14.3839293638695	13.7236251669676	13.8410901125984	13.7308096300799	13.930077699943	13.4229422023699	13.7415817488756	13.1235440439525	14.6651479404109	13.9423681696725	14.2511553522338	13.7877954716494	14.2193631868817	13.6694309836078
X2.23_1179.5290m.z	13.7926400152383	13.2848755643435	13.332542230543	12.9469051600964	13.5824118204778	12.9542251758073	12.5094226083119	13.5248901837871	12.1487234334185	12.6675692389795	12.8744615045818	13.035524543815	13.5050620744611	13.0032694843208	12.4501599853138	12.8533645287016	12.7034912570162	11.7994141211063	12.6941153089593	13.4042603281278	13.1864501888551	12.6022962650499	11.6398333655229	12.9389866675871	13.4959547327255	12.1744283483343	13.2393360831273	13.7174286229176	12.8840743357841	13.7893544125869	12.6939872388291	12.488501528832	12.5063448262117	13.2918000896073	11.81706418492	13.1970404863748	13.3778614245008	12.3348842091117	14.0040338282643	12.8206818348912	11.3102830848653
X2.23_1152.5286m.z	12.0627753278143	11.1039675729399	12.1880661558818	12.0602377879174	12.4952591848373	11.9949554819625	10.622354482374	11.9975768677819	9.8902669687936	11.04550305326	11.6161689931113	10.6759605481457	10.6588772814809	9.02702513533141	9.42906635581589	11.3455971447432	11.3512009325417	9.89494622102501	9.37397396781192	12.4662223285888	11.1046143589169	11.6518461887142	11.2969287482279	11.9938350269438	12.2931041344296	10.9544512127774	13.0245641667405	13.1355383476032	11.681146563293	13.1450654666776	11.6729484785575	9.22954539828818	9.35709693813099	11.5182368265942	11.0189573345157	12.1470745553399	9.37942586106036	10.8357193588062	12.6898723356836	10.5513947884072	11.2569957460877
X2.23_1030.0175m.z	15.0139843732844	15.3435090376697	14.7605250077745	14.8098802562453	14.6852321248163	14.4704408233458	14.3739684029406	15.1066574684175	14.4850119286091	14.7287277599565	15.0777248664165	14.8717760272407	15.4807023556391	14.7210112926034	15.0871933989316	15.0237042738795	14.5581257657941	14.9951744210585	14.501953035336	14.6373100143408	14.9806017843156	14.7235006952425	15.1351771990731	14.4339025722911	15.0090933807745	15.2619168962972	14.8907971198995	14.9404053477431	14.5622086265701	14.7452785776873	14.8228844252516	15.0040685412917	14.5269948900439	14.6005367163305	15.0079414635122	14.6466110750374	15.2947580198896	15.2239039506318	15.0899244271623	15.0145098039582	15.0094117350909
X2.25_1050.6798m.z	21.0294394949575	21.5626710993025	21.3027330409866	21.6049040598482	20.9587460028804	20.4106010897927	20.5000775344804	20.932116743391	21.3895131862985	21.4696847670777	20.6059567975612	20.8203412732479	20.7630088802885	21.0172668612887	20.7447542735241	20.6227003805106	21.2887741211336	21.5720854080531	21.9372910902698	21.1818658154851	21.9034297151246	21.2467794978994	21.6369257605461	21.397275730785	21.2843376365795	21.5649781862565	21.2009355394263	21.5619441515985	21.3370949403142	21.2021131724262	20.8044751755865	20.7271347608601	20.8305534574658	21.1959823449702	20.7847606394345	22.458700058482	22.024671557032	21.8293705461587	20.6703512480796	20.6054701810982	20.1687147118848
X2.25_473.2833m.z	12.3378106610359	12.4638482178574	12.1449024336868	11.5387712074125	12.3146945576326	12.5153757133536	11.2383549423863	11.6565648174506	11.3052339729235	12.0843156326797	11.5263991528576	10.9853915971462	11.9086384788466	11.0782017052548	11.9442131106303	11.3926219822992	11.4180552961691	11.5655417091396	11.8086283001491	11.6066691103665	11.5134088442649	11.0537857848133	11.8622153455252	11.9428837729674	12.0207511531535	12.1708499970533	12.5111348138126	12.7522079954111	11.9986684575348	12.1772014314113	11.7108579872408	11.8871260306895	11.265585535262	12.2702275462229	11.4663797937695	12.718356981001	11.3591145128205	12.0770259395382	12.1640317455717	11.3789536557605	12.2856945708412
X2.25_877.0079m.z	14.775593597858	15.128032106845	14.7696861538026	14.6923726880405	14.260092178212	14.3212363101839	14.7950758948174	14.8738905778754	14.5253284836157	15.2621172272975	14.9590774992872	15.0116341454902	15.2027811210317	14.9415253446482	15.4080736195042	15.4718263698641	14.7781315209049	15.2602714656329	15.2406312563074	14.8587983790121	14.7646496940262	14.6813371265473	15.208857784606	14.6033238736292	14.9200571541583	15.5314198514352	14.5688252128011	14.9060327826947	15.0914339755412	15.080309122299	14.6865167494542	15.1996449562132	14.7501868713862	14.9864275183928	14.9767608847856	15.2428948512388	15.0389904414212	15.609799583282	15.3914588469751	15.0140721992617	15.4029678725773
X2.25_870.0137m.z	16.1015758515684	15.891419377673	15.9387729894869	15.9871067022166	15.4513290410082	15.743727752199	16.0664195053713	16.096187685589	15.9031431193894	15.9370749107272	16.2741785961441	16.5708397946085	16.6063242579114	16.2829606758658	16.3036355074205	16.3796055482519	15.8727147132994	16.3070806627674	15.8571022857414	16.0820988167753	16.0097850491344	16.1939948234118	16.2897886351959	15.9539754699164	15.8986654070515	16.6669699306663	16.0013454682824	15.8565573444322	15.8251899418822	15.7373134542259	15.9893020493582	16.2262237040872	15.9450626941069	15.6297128548456	15.9395704038798	15.9886217322605	15.8666385999267	16.2910204874795	16.6141003863761	16.2685687548047	16.1442497163631
X2.25_1326.0325m.z	16.2884009101433	16.0819063343044	15.6830210712606	15.5093304358097	15.626729364861	15.5265955477411	15.6807660990169	15.7033384551601	15.09508986519	15.1761640297733	15.7518593082729	15.4778280978363	15.011083733969	14.9391362532468	15.5887544055532	15.3132520371734	15.1160511890655	15.6989262517933	14.9378482017898	15.6477931179738	15.1982163487377	15.2177308132151	15.0581647994168	15.6464475199297	15.9831658618775	15.2496020792371	16.0179730980152	15.8219608775122	15.0816639645209	15.7236655078692	15.6504736753081	15.2734696326407	15.1861683149037	15.2305912496105	15.0000955940448	16.2964335755574	16.1005627130462	15.5141474846196	16.091444478309	15.1465404020124	15.3551538049386
X2.25_910.0093m.z	13.939513404908	13.6225287973812	14.5461941630284	14.1405568380937	13.2987703309384	13.959064286615	14.0505026409058	13.9403861170432	13.9881834331371	14.3083533629823	14.13759019432	14.0836739890515	14.4740571938059	14.4044112181591	14.8224675681178	14.4164383945151	14.0857622011682	14.1350139616754	14.3153409661472	14.1094383344173	14.271639181028	13.9485083039446	14.5737652164155	14.0095770066206	13.944935053953	14.9796245104455	14.2997096375827	14.1127968886417	14.2239843192012	14.1864952949659	13.6859891062155	14.2885200702656	13.8177026296439	13.9562687996911	14.282013392872	14.777661276777	14.701328938413	14.8711687672668	14.1725602647662	14.065480836795	14.2078265953514
X2.25_906.0101m.z	12.9204245498139	12.6824635875132	12.3319128280829	12.6779626134921	12.1594313548141	12.3388336947429	12.5384343704259	12.5069212627927	12.7985340088091	12.6775587143408	12.8950963302198	12.918422269197	13.8713331470761	12.8295795995673	13.6035630759218	13.301728824287	12.5893589818975	12.993402469871	13.0857168610935	13.4602250775776	13.2231982693805	12.9548467011361	13.5298005941569	12.1566941518185	12.7550277656296	13.897035550054	13.0116702390449	12.8339374387213	13.1611445973448	13.2067503389167	12.837871206542	13.2032725958203	12.682714246874	13.1163273890086	13.2006991820759	13.4304690843023	13.6251924473208	13.64661257295	13.4718197808211	13.339701833055	13.5338655763525
X2.25_1011.3550m.z	12.0073848684091	10.3946309113895	11.1775568596222	10.3362266374215	11.2443385277292	9.38725066314118	10.561724242449	11.5671320726283	11.7350260262621	11.6381665789614	11.5570838053317	10.6257819429129	11.2629597810272	11.0584206117905	11.7119292816618	11.7882563375757	11.4279403218695	10.7619274218473	11.1918189181613	10.9846773095469	8.13592690878936	11.4827447397902	11.3400506693589	10.5844369282515	10.8010508854962	11.8287839293993	8.3635099513845	10.6647879890145	12.2588796918071	10.3863552922668	8.18197239217822	11.7956250273803	11.5050078300683	12.1608865626792	10.878443812977	10.4036353095216	11.7042886261073	11.7958116557915	11.6693095537001	11.7423354771688	11.4276571793596
X2.25_959.0208m.z	13.7705778153583	13.624455695795	12.6136949696312	12.0942028621553	12.4065979847154	12.8940711648314	12.6606141692014	13.0689851177345	12.5742180741443	12.6818427790787	12.4231125810492	12.4953927884976	12.6306568421643	11.9706653635328	13.4024024977192	13.0422496667541	12.132369121072	13.0056781217021	13.0612406438774	12.3296040897638	13.1195060339644	12.5005747044267	13.3483504429471	12.1245585806657	12.5112130276667	13.4076591311167	13.684507831174	13.1684979983123	12.6245432728951	13.2047617842071	13.2035662924883	12.7024935859087	12.1163011281791	12.5217230847856	11.994667626429	13.5216878198422	12.7907465684405	13.0802880017008	13.7001074773178	13.138155886344	12.5533812306566
X2.25_835.7603m.z	14.8321040515842	14.8223513804248	14.7238363504953	14.7702263082488	14.0313479881432	14.4661321584009	14.6021667515714	14.7092131465073	14.38009863303	14.8432241990629	14.9077327452004	15.0798520188652	15.3004851322716	15.1405772748858	14.8167666349039	14.9503935674456	14.3449885221986	14.923129147333	14.8515769437142	14.7053298569803	15.0356670705714	14.6188666646319	14.9303711642456	14.2791600892666	14.6332656708204	15.0091703819446	14.4660539739106	14.2218055191898	14.3716203901325	14.6594274362671	14.6736330658741	14.7176742189433	14.7667373751976	14.5847233098936	14.6093921537801	14.4283406835174	14.6746044643942	14.6766811615959	15.1240279627102	14.9168812631778	14.7984376816135
X2.25_1100.0247m.z	13.6339404445532	14.1484095731301	13.0373801502713	13.0637520042644	12.5353700440967	13.3197801669401	12.7525735228999	13.3645088203752	12.1241161570409	12.8914832229539	13.4156676619627	12.9774398075619	12.6190430714177	12.6979721253015	13.317369607425	11.8958874080479	13.1106720121929	11.9855449401453	12.0704332427764	12.3523931355243	12.7516950334054	13.0776780836508	13.2874189610963	13.0816723313278	13.5238666507024	13.5780578092669	13.6244645806397	13.2490097425275	12.1325428338583	12.8678825663439	12.6471388004252	11.7319986086094	12.2239471718974	12.1342038555691	12.4158615410096	13.6780215943521	13.3856197615591	13.1231825238519	14.1633022715865	12.5160713028662	12.9674890211656
X2.25_459.9947m.z	10.7705407876309	9.31926595202622	9.63284616452851	10.1179715757271	8.96328045062569	9.31326152024297	9.6059465042558	9.93186447282876	8.99486403680601	9.7935660558094	8.53268179788294	10.4872788576314	9.01787127693295	10.0509859526374	9.77151154597657	6.59893227312438	9.89727865013525	8.99010599806117	9.56272046926849	10.3705519960249	9.71278464714345	9.43296706706215	9.83494365054345	9.98819082850926	9.9581395919536	9.94630108806187	9.78539303048358	9.90583096357978	9.81897390608865	8.97601029705776	9.15221704397114	9.90054092635311	10.0015040421304	10.6151107089825	8.49604519174424	8.59646385089424	10.2043065795661	8.73480597383975	10.4719793177161	9.66271821920786	9.369959033082
X2.26_944.5119m.z	20.5070025277426	21.0587519531603	20.3313689092975	20.1700441255364	19.8711625763326	20.1283818361755	20.2942404705687	20.5049171852131	20.118818438051	20.3568910339563	20.7259890121378	20.8253745535807	20.9559782191232	20.5924463655954	20.6131079711645	20.5367544044538	20.0560616447659	20.6367954798089	20.1657364738372	20.2414755911165	20.2671926862277	20.4911023957151	20.4855462691535	19.9832112625716	20.5377560263976	21.0397519183796	20.3303447425706	20.1248126767227	20.1212544128292	20.1301337827167	20.2756264677654	20.7228173931655	20.1828475596333	20.1945886756278	20.2608418997052	20.234538761303	20.4187444742396	20.4381923517886	21.1809748028811	20.7839134936572	20.410134215434
X2.26_1033.6834m.z	15.8309459463891	15.9784856025393	16.3253267149642	15.8332610071475	15.2792876464148	15.592410617103	15.9175472280103	16.0366991138065	15.6580980842419	16.4119754198899	15.9440321443668	15.9037052746232	16.5161527071508	16.1844074673511	16.5339956652073	16.3796167005859	15.564072742059	16.2673670827803	16.2674712418098	15.9247298576775	15.9506346578405	15.9740626776074	16.4346922385496	15.7499568380619	16.0170724488149	16.7989308901553	15.6751969272943	15.8914825992805	15.9180287879359	15.6581806019373	15.9949387188376	16.4952064433564	15.7924587554982	15.8700268638604	15.9688928902456	16.1047249819095	16.3621761163997	16.5023322949185	16.3171096524942	16.3883019315549	16.2388818241172
X2.26_1090.7696m.z	19.2374266614106	19.305635989011	19.1332286149885	19.0278418747251	18.6533171783067	18.9354128198957	19.1030350043962	19.3384138351615	18.9294088748607	19.2098135992258	19.4980744493065	19.5449006255126	19.7070075698244	19.3053825945697	19.4500180637656	19.413365155659	18.8320621879635	19.3357703031923	19.0619562377514	19.111993962575	19.1806172941881	19.2629992506364	19.2323803201865	18.8250239089315	19.033416667844	19.7221553605675	18.9581424745393	19.0277017014293	19.0100595719742	19.0469594842446	19.1056064030696	19.5115299581743	19.0770061900593	19.0574211035117	19.099080341602	19.0151900688682	19.2453106100119	19.3761392657349	19.70704608096	19.5425033967413	19.2384952257656
X2.26_1267.3564m.z	17.3897486339774	17.3630401901346	17.1599585318702	17.1543590855209	16.6073440017742	16.996932358973	17.056306168628	17.3261400857691	16.9983676197673	17.35362513575	17.6271499994437	17.7918614687067	17.9253986345995	17.5396107682434	17.5496605863569	17.5033513595983	16.9939364139221	17.5445068258708	17.1294210529152	17.2384646409633	17.3559286148202	17.3995963684193	17.418122546021	16.844720540536	17.2278606085373	17.658860423058	17.2124850026429	16.8794799293141	17.016620495578	17.0431006753591	17.3875424431573	17.5995080511197	17.2965154282539	17.0304814847633	17.2884016515138	17.0563978283612	17.2528947336576	17.3380526868144	18.094454334889	17.5703943119505	17.3260310294145
X2.26_730.5029m.z	15.8744946084659	16.4336572402056	15.9250658159061	15.6871340751046	15.5033519678473	15.6385097439095	15.9226340674372	15.9408353645398	15.8327880982823	16.0721943865878	16.0557889491987	16.2400440713104	16.6385097518957	16.2081443623766	16.216668950361	16.1158933637498	15.6024921003521	16.3163176733162	15.6840208306291	15.9648977840895	15.6382131863759	16.0209459032466	16.1428984187149	15.6053249321902	16.2631348091184	16.7486337653737	15.8227378963341	15.5265508163259	15.8466314536884	15.5060264606962	15.7706340658328	16.4609830615017	15.6977078120707	15.7622466292348	15.7968519296449	15.6722698604472	15.7511600623975	16.2665602880385	16.6674720331065	16.5447876644399	15.9851495325585
X2.26_924.3483m.z	16.7503640882585	16.5539609389138	16.5425624150218	16.4142983969821	15.9359456816119	16.4054479707329	16.6440370462392	16.8318567234712	16.4312159364343	16.4684364963869	16.9269177793717	17.0561830786031	17.0734940252851	16.9002166245229	16.8372773945659	16.7912302731688	16.4134128844165	16.7760016660064	16.4981880600618	16.4899256907586	16.6176621900991	16.6017734027945	16.5843690758658	16.2622842839765	16.2778423686744	16.8325294613181	16.3181997946912	16.3831501556315	16.3725231791467	16.4546119240276	16.6556243082756	16.755800921914	16.6402362624568	16.4613568515247	16.5818078993306	16.5960810059429	16.5375594333747	16.6132844196901	17.163177149925	16.7500179120035	16.6260228314569
X2.26_1111.5272m.z	17.7717731099162	17.8295717714694	17.2499339846662	16.7170093713976	17.0210612081445	16.7771664197464	16.1090673522708	17.2814001190449	15.917041877896	16.035716718999	16.9749602766001	16.6624084956495	16.2138517401177	16.3750342690586	16.2846621279275	16.1020545000658	16.6191424177291	16.6421251723698	15.7486186630119	17.1233443790734	16.2881849406132	16.5944474671	15.8504804573899	16.826789819514	17.2198170729029	16.4427659866617	17.7761244958186	17.5930923327691	16.1543571772548	17.4037807294223	17.2244151606423	16.3206581328056	16.0547995356658	16.2459702640802	15.5675764113486	17.7319555625598	17.3961718532341	16.3702550861822	18.0249432009375	16.5357566689625	15.8068198960159
X2.26_1212.0230m.z	15.3136679629417	14.9409552578318	15.7215962412179	15.261944461128	14.7786569444676	15.037383045479	15.1490904865769	15.5189717999452	15.3377456184002	15.4985775012575	15.1699387584748	15.4915511326171	16.2608797817901	15.7595253914656	16.3548631865327	16.1627307650682	15.302239654467	15.3600230239962	15.7907066689385	15.3225803478353	15.3224969243548	15.389442727341	16.1057035033552	15.2582749217119	15.1258835433047	16.185532297593	14.6887831618029	15.3067746708132	15.3462605261656	15.2627677801737	15.3457862610383	15.9557413538419	15.1623796104038	15.2252801493978	15.7240006644584	15.5888039202825	15.4344704680449	16.0566839251937	15.7007710276911	15.7628533384382	15.7259053473352
X2.26_1229.3584m.z	13.3558654275753	13.6360906986158	13.6554371596608	13.5478967815777	12.6536267808666	13.6484333266103	13.0685897579845	14.1801300406421	13.6600193350229	14.1749847403554	13.9123119635748	14.1122294916925	13.9645780590067	13.9792019041312	14.4414077224789	14.7214166441621	13.5815133755887	14.0158206642796	14.0255523498113	13.8040585689237	14.2749263754664	14.0288657211371	14.1374412797405	13.554394612871	13.4778673466037	14.7339384548958	13.8099196404165	13.0498605865811	14.07629398921	13.8650877611332	13.7934370365129	14.7413241854169	13.4130254432281	13.1211818023357	13.6884612454037	13.6137697126128	14.4587675463584	14.6267062633195	13.5488822140678	14.1593122050723	14.298583413111
X2.26_1238.0284m.z	16.8868753228763	17.0744375434978	16.5282329057384	16.279687680606	16.3505065422825	16.1494225874181	16.3720259770691	16.4170171409801	16.0345416248215	16.3475129406636	16.8116015424665	16.6557898910236	16.6506634908442	16.3500878133843	16.8492497608063	16.6953742598988	16.1283928033303	16.7232080665677	16.2452771291652	16.2138650226241	16.30264519056	16.511300318579	16.5790932410214	16.3290337629301	16.7733659302366	16.9929189926934	16.6128974164307	16.9875179890918	16.2897510628457	16.6227783133666	16.3314362978071	16.7484388579759	16.0035249426892	16.4216811726879	16.1718500059661	16.9088709738874	16.9582773614513	16.8146011162132	17.237129328831	16.7984557209172	16.4082620885416
X2.26_927.5155m.z	12.9607468256648	12.8715544640511	13.4455096769749	12.7867660607175	12.9224800109294	12.718999510409	12.7297108161979	13.0397474848238	12.4933571567105	12.4107676489682	13.037622914775	12.5607426758533	13.0211929244643	12.4854197144775	12.8080267383543	12.6949744164036	11.4376465865978	13.07298962752	11.1450997349995	13.2889267334748	9.65447802219216	12.5469908901158	12.1920158695774	12.2736546700591	12.3417847387732	12.4507333339631	13.0509874233581	12.7213683545884	12.1794580866059	12.6419688799013	12.5897922487326	12.6403513638993	11.2364964207975	12.5460105972559	12.3188105752157	13.0352837033218	12.5783213588721	12.7853314654601	13.2697780788555	12.7893572848599	12.1603176728769
X2.26_964.6761m.z	12.8817237204525	12.4211255786735	12.6681072451643	13.0602277538892	11.6618911714324	12.4337336928037	12.797264905513	12.5804621500726	12.3726001223625	12.7697990965379	12.5538254142483	12.5551119214104	13.3152549578234	12.6698133483427	12.9268224293973	13.6365304477444	12.3966721292658	12.5682859060054	12.4931817103864	12.7448834460262	12.8451288770909	13.1586243686404	13.2825383087015	11.946133401398	12.1702765958473	13.5126822558963	12.2616730376602	12.7325177274057	13.1127058212264	12.7724783237076	12.849936653293	13.0530161585481	12.7327936390457	12.5526809404298	12.9783992735903	12.3906785370308	13.2881361940683	13.0793303912253	12.4759424461151	12.8785244083284	13.3993037192175
X2.26_1191.0255m.z	15.8013111689806	15.4501670411397	15.3930344994379	15.2923349650892	15.4365138270942	15.3011631164716	15.3249697841252	15.5109733394406	14.8044844878612	15.4233778118948	15.4053326144514	15.5033904008966	15.5596085822021	15.3237402895182	15.6097067663329	15.7401982931132	15.1044464544775	15.3598505122746	15.0814325636544	15.3350728696579	15.4488693935547	15.3283456406806	15.1710155901046	15.0097486391858	15.2127626909719	15.8464488037343	15.656772160783	15.5010152276169	15.0680709073421	15.4628438744329	15.3856077503576	15.3518647761112	14.6989507152834	15.1729069049781	14.9929442953123	15.4824162453322	15.4367829749195	15.3393185739523	15.9854056468691	15.3933776347206	15.083528524344
X2.26_1181.0279m.z	13.990209306194	13.9414724137759	14.1091160817003	13.4538094531844	13.6624316089324	13.5717268781844	13.6264496370657	13.9570086389356	12.712033498276	13.4974165970291	13.3516766428988	14.1906864547533	13.4008484337976	13.6546549400965	13.5848489513662	13.5076444056904	12.9941677478887	13.450380371912	12.7090617663932	13.441698576205	13.5746737102653	13.0435873085381	12.9100186363492	13.3506605264004	12.9194973981616	13.9446910997356	14.1155848437146	13.7614858377956	13.5068555983974	13.3000201436156	13.1681683043689	13.3671806689324	13.1246969029435	13.5640839821101	13.6748852332666	13.313068345971	13.9501565019432	14.0744864888428	14.2927989897326	13.9257652674882	13.4649702568736
X2.27_1104.5197m.z	20.3151876373686	20.4319278685995	20.1301807810114	20.030461630453	19.6823683829774	19.8739766418492	20.0815183061632	20.3247415380126	19.9285270174322	20.1896454635178	20.5050232088493	20.5517825017755	20.8043825070934	20.40762456337	20.4806096354918	20.3539195033197	19.9054035599073	20.3971088566716	20.0467815564425	20.1239912495459	20.1586366773269	20.2575007997587	20.2939687593755	19.7663986519217	20.209225738714	20.7545562795889	20.0293160068491	19.9689333695781	19.9666366220559	19.9596977683234	20.1451882745876	20.4590579538613	20.0787563064564	20.0011961273765	20.1478662779613	20.0527483849897	20.2718207859243	20.2733066458872	20.9354852801433	20.5404766012641	20.2364047796593
X2.27_1050.5187m.z	18.9680945939276	18.9395852593034	18.6177801331388	18.7994987356485	18.3813297962807	18.7678981319366	18.8296101676971	18.9456400714854	18.7163392531884	18.7396607291897	19.38546476361	19.3440863609115	19.429853001757	19.078740010321	19.0572837117036	19.0282870384777	18.6465767060399	19.1364034461671	18.6424771214369	18.88084592498	18.9806802612124	18.9273632189736	18.9103680117037	18.5558387575029	18.8312145869873	19.2431035876753	18.6998154301259	18.5705161700541	18.6778030640206	18.7324021185019	18.9756836345644	19.0644454938941	18.938216792169	18.6571082132426	18.9461881739083	18.7719853271638	18.9396817997141	18.8896116883041	19.6490281903503	19.0994376566887	18.9107056467824
X2.27_1268.0217m.z	18.6123830103409	18.5260488634148	18.2793417678355	18.1764444959933	17.7346228067225	18.0838175801508	18.0805964410843	18.5274388684082	18.0286496283939	18.0840774927656	18.5454372755315	18.6498455234408	18.8467868257806	18.4283181450377	18.5600424903987	18.4247491052961	18.0274659648821	18.4955249076241	17.950418588137	18.3683887134805	18.2799663329877	18.3408079313399	18.3975730394205	17.9185351678046	18.3251679710626	18.6061636475245	18.3075608892933	18.1440387033461	18.0487206019233	18.0707814922607	18.3370798115376	18.626171398214	18.2138077134314	18.1354581808565	18.2325576701029	18.4433282561919	18.494585463815	18.3093982346581	19.0839662861665	18.7114724411364	18.2746478083911
X2.27_315.1374m.z	11.8858015607647	12.204428798376	11.8746634494438	12.2225889716399	11.3767945825472	11.8959535290413	12.0078182501468	12.1313975778759	12.1431611501279	12.7424062093226	11.8136121689038	12.7869937823012	12.05975085723	12.3539625686523	12.8116526574549	12.3342334688366	11.8293247451023	12.3306098726785	12.2838338461142	12.1800031097399	12.2107436523647	12.2739536298323	12.7790647100908	11.7355833487043	11.2304257510779	12.5298179612315	11.2439481130396	12.1603530995978	12.2860188380769	12.2591678130648	12.0750816713664	12.8406898325823	12.383430673793	12.6283248011949	12.2717996512889	12.0391474623441	11.958191893918	11.7456955667167	12.1031690084191	12.6837135270587	12.5137790428576
X2.27_931.0090m.z	16.7666727380344	16.9444379575233	16.7664546472585	16.599502089066	16.1543689951574	16.5159803746752	16.7584773320776	16.8720261976117	16.4752989227013	16.4633536903445	17.1725101751869	17.1084428739235	17.2057212204384	16.936451206589	17.0097332419237	16.8679670685846	16.3126245227642	16.9026500384105	16.5772738988908	16.652191197303	16.7651684200728	16.8563944400482	16.9233916235067	16.2172506721351	16.5696647846217	17.1781414924996	16.5253282099452	16.3952298580455	16.5668391690669	16.5514378434599	16.6162277975278	16.8952185798171	16.7423214377642	16.4388618777161	16.7688102110881	16.4692501178446	16.7279916205472	16.6472044411425	17.4498269336172	16.9620035995173	16.7424381589765
X2.27_1026.5130m.z	14.5353445538856	14.6223009162459	14.4438435095599	14.3127569116711	13.2932972506314	14.0364962379261	14.1829254393639	14.7890278145269	14.384384774515	14.622220993545	14.0941824747145	14.457627889873	14.7603938027295	14.5146939615202	15.0630915500085	15.2134332272201	13.9687611106462	14.5057633711511	14.983641394823	14.2809675175614	14.6923414363802	14.2078108557549	15.1049608219539	13.974135366475	14.2389242866037	14.9937600329124	13.6391935673362	14.6607374609145	14.7359671219503	14.1167996834919	13.9300210773001	14.4936696748463	14.2096142403197	14.6163680500956	14.4598997526484	14.721970895679	14.2214847140511	15.0844027979299	14.7365185566675	14.7603852327235	14.6472244205114
X2.27_1381.0330m.z	16.0289671567294	16.0077259932567	15.7055894060664	15.5096938580511	15.5015449111204	15.4800097532756	15.6297893359121	16.0465455398334	15.220372236321	15.6716034734843	16.1658823482585	15.6733088651041	16.1462684042037	15.8756040825927	16.178898496241	15.9279230648175	15.5015449111204	16.0559264958981	15.6923161834838	15.6898725075152	15.9949630750094	15.6900452580823	16.0635165523509	15.3276822747613	15.8216938366448	16.1874253328456	16.079496670066	16.15194428727	15.8968024604024	16.2818969572156	15.8296453203108	16.1862889084143	15.4880713134068	15.9522520708382	15.6764894018092	16.0870739474573	16.0207311698207	16.1270592797986	16.6115601862903	15.9939205893544	15.5900277717509
X2.27_1319.2758m.z	14.2123155613607	14.0196546299975	13.4444333712857	14.4874830331017	13.9679219874084	13.0644765588021	14.4673022966752	14.5133614375468	13.8369055163134	14.6056768778893	14.1554313479689	14.6682103537468	15.1270942476326	14.6490585951073	14.8525266315642	15.3149783923162	14.1681461117045	14.863250353518	14.7717506057856	14.3629878912993	14.0979131699648	14.1808727393434	14.7990006977396	13.8910468548404	13.8127162890148	15.1434658373156	14.1014666782465	13.8534029474769	13.7832910571377	14.0779824054161	14.4637924509537	14.5879647563074	14.2157813501351	14.4830397009936	14.431400221356	14.1988321937029	15.0349856323938	15.0395497375257	14.6628885006313	14.0808736809335	14.6566828023796
X2.27_1198.0188m.z	13.6989677875578	13.1643337680198	13.9251481191226	13.0001240717419	12.9503480198982	12.9265929260587	12.7428045594369	13.0633847287962	12.8813251933432	12.8640762908035	13.2946896279539	13.1076729856949	13.0072640461574	12.2851616992062	12.6237712966696	13.3465818723088	13.3321201472412	13.9925758902949	12.7690811459558	13.4694437195424	13.4270236868206	13.4912987055826	13.2731676979906	11.7541627060897	13.3536416717153	13.9212013151937	13.8110766035065	13.9985993987503	12.7271372550559	13.3881505867484	12.686838236657	12.5645552887326	12.3044108583801	13.2256669091061	12.6878350645456	13.7127397804251	13.8242742033301	13.5213942851766	13.2169242267365	12.8085683857762	12.7765048261443
X2.27_1062.2713m.z	15.6348765103594	15.5170044509169	15.5015449111204	15.5601685850052	15.1923087094917	15.2678262637248	15.227549935004	15.7125546736969	15.2703330055584	15.5398135738611	15.7669721965653	15.8590416322432	16.0299150986802	15.7515447994687	15.7796517983122	15.8527522373058	15.2285732256644	15.7157109846311	15.5173582181077	15.3360546035287	15.5494597780498	15.6460208944688	15.7295814293598	15.3843319478632	15.4111098431861	15.9391060746917	15.1677504373052	15.4076264632725	15.5292353532406	15.2808305109028	15.5721500008558	15.7965319987264	15.30772537074	15.4511004799755	15.4765808999344	15.4249165039594	15.6605103179164	15.786727762834	16.0073350839464	15.7470620528884	15.8190160471124
X2.27_1102.2726m.z	14.8308913797971	14.472690621495	14.1476482703587	14.4530695072328	14.2902921168243	14.2480617589825	14.1689607663695	14.9781526044781	14.6749275010625	14.5575116560321	14.9997356143142	14.712008798249	14.9618587624618	14.3670756349048	14.9189028863725	14.6455234755564	14.683241852598	14.8795339921571	14.3445524684467	14.7000975328796	14.3430802431471	14.8723874971749	14.6911765549446	13.9789143273738	13.941785519057	15.0139827789939	14.6272345184021	14.390771623082	14.4049528841684	14.5654504359968	14.1618814670141	14.7811055018828	14.788996810044	14.5854843380151	15.0318452247367	14.7067267441997	14.8078560418485	14.746410990266	14.9258346424366	14.9238271970116	14.1357890164307
X2.27_1397.2831m.z	14.8145046022708	14.750933827824	15.0209156203194	14.7026463997725	14.6677529956244	13.8500577439612	14.7064980685989	15.1664248722778	14.6081844494978	14.9357800896469	15.0980639866605	14.965430584322	15.2911220615937	15.2033058796271	15.0343408997341	15.6510721233767	15.1065281550052	15.1060612619832	14.9611125784769	14.4487560403231	14.885562910684	15.2745249332813	15.1763598962321	13.9110956507106	14.9783810288879	15.0218501619354	14.7310082104272	14.6584314413778	14.9372746579322	14.7529964620825	14.9673528814726	15.1279969572759	14.2789797469204	13.8614975528779	15.2940178945614	14.6356673149139	14.7919909482218	15.0773202719626	15.3324290442991	14.9588748455036	15.2663956642028
X2.28_837.5074m.z	19.9563165690589	20.1567273383623	19.8325107555742	19.6015531029792	19.2726789335288	19.5362426851533	19.7112275731834	19.9064747738985	19.5447400992339	19.7604519991521	20.2131627410072	20.2310124599822	20.3597306703259	20.0398291399583	20.0043220081581	19.9145826382892	19.4773839479107	20.0295487371595	19.5835795700214	19.6816920487281	19.7379912535206	19.8750304171561	19.8565232181894	19.3680358206518	19.8533393064117	20.2878932990687	19.6506392788339	19.4960553336115	19.575008198519	19.5525868056108	19.7456763090771	20.0488675540107	19.6591983876443	19.6123531948929	19.6509699002028	19.6434132624294	19.8315461850667	19.8635861838906	20.6133714374971	20.1821324617995	19.8473478615646
X2.28_1266.0247m.z	19.2672455611955	19.1931959598678	19.0872513710738	18.9963991889347	18.4820543459932	18.8797678982958	19.0396362937338	19.3240918683731	18.7990981927815	19.2214498696286	19.4350534627961	19.5783800124985	19.7771875153776	19.2992119504504	19.5524385890799	19.4930061711054	18.9612395573492	19.4446696870646	18.856218624205	19.0812184366712	19.0878906675696	19.2353183473893	19.4493873954512	18.7823601487798	19.1769136099186	19.8796713970899	18.9480815550644	18.9409943538119	18.9272085935588	18.9334408357503	19.1618140613162	19.574479551315	19.0939430126664	18.918191732593	19.1557590274697	18.9540877441337	19.2687038822451	19.3723629721359	19.8739856269208	19.5891449449968	19.3269217902901
X2.28_1411.2847m.z	20.5340111900441	20.6291816101634	20.3797527211777	20.2572384761783	19.8790171762036	20.0590006135052	20.3004763008584	20.5945239206414	20.071116415057	20.3918213237888	20.6741276914985	20.7520852485192	21.0094613944535	20.5253458880539	20.7981641310999	20.6760616456167	20.1090200740399	20.6182795602792	20.2494478822917	20.3180853954393	20.3372507075298	20.4320325572259	20.5935488308782	19.988554040643	20.4731972503935	21.0614408599828	20.3115862458377	20.287550087949	20.2063225832118	20.2117539885416	20.3450706121548	20.7836295467459	20.2729436480221	20.2786842602723	20.4216602049459	20.3841022295122	20.5607007192174	20.5779078550708	21.193785641556	20.7489425308561	20.4889745877749
X2.28_1264.6938m.z	16.8037342482918	17.1593915281131	16.9253679492936	16.5770039025125	16.1878158303141	16.402540361496	16.8031467254698	16.7781072437859	16.5565403293645	16.9481684417973	16.9497706926226	17.068561080664	17.4301749003454	17.0765336497262	17.1576033792126	17.0978490785477	16.6519328813356	17.0145824206948	16.6317308790837	16.7018236599783	16.6241957675039	16.844436555474	17.2824272917808	16.3974655187226	16.8403913913731	17.7048957731311	16.3815847484119	16.6300983357886	16.659356134156	16.5357355422468	16.5795843521395	17.1312218263972	16.5417650715666	16.5939081792524	16.6286973605943	16.7801531810274	16.8870839324474	17.2418037418729	17.1859894886477	17.1467087212994	16.8481137614131
X2.28_1185.0228m.z	19.2402615216078	19.222803298667	19.0154395247822	18.9881765245406	18.4806831554244	18.7218151076809	19.0248610579379	19.2432955019445	18.8278352177863	19.1014180100078	19.356141660007	19.3531413859076	19.750776568728	19.3023041438606	19.4171280317241	19.3697163829374	18.927052332986	19.3694353634576	19.0265044329474	19.0382665548037	19.0898329487889	19.1373937036707	19.2498700406886	18.6358426526575	19.1145385549716	19.6734304493596	18.9108823585454	18.7982466736825	18.9857110893569	18.9631453122033	18.9842808486414	19.3443733587354	18.9456239516633	18.9227667136221	19.1222334722635	18.9838584671749	19.1875717831607	19.3201412624532	19.82406328937	19.4774865143584	19.1026479230001
X2.28_1035.0150m.z	16.1597527611108	16.3135273197097	16.2957514978064	15.7781034378919	15.4768131787377	15.5529464452239	16.0202469394664	16.2633790479515	15.6757442577801	16.2497600575205	16.1475201444449	16.1008133111792	16.5994296627957	16.3916493437349	16.5839946339309	16.4650016637572	15.9172958578761	16.3816341724894	16.1290075049183	16.119407307242	15.8888141020716	16.0376354775187	16.5649809550712	15.7050351796721	16.1967378897011	16.9043297786787	15.7469191586486	16.1333958256504	16.0500626425315	15.9105356995503	15.9235743846248	16.5353023749693	15.9540144645653	16.069005642079	15.9498938186116	16.3595617626929	16.3211923287158	16.6592939333045	16.4824266939216	16.5612651634295	16.2134400832286
X2.28_1158.0222m.z	17.4500952656599	17.5260078904174	17.5646812034064	17.370458683089	16.7929303539432	17.0823305662614	17.3931872299425	17.5756080632594	17.0820495068321	17.7456885082861	17.1675430574259	17.4819158902688	18.0887426615583	17.508202808146	18.0210192510289	18.0242140872022	17.2727362649786	17.5547807155967	17.5969634623647	17.3211969007896	17.316898274164	17.423674427058	17.973050128306	17.108668282404	17.3507305142951	18.4891007915624	16.9837155127386	17.5653373564049	17.4667299101661	17.2873587963167	17.241394453412	17.8642395848504	17.0745833888953	17.427675839312	17.5361448125493	17.707203889869	17.7497849818594	18.1213153785902	17.6934102514085	17.804611555536	17.6264492885292
X2.28_1423.2864m.z	19.5934565873399	19.8032675410059	19.4473074839208	19.3239451905868	18.9539507502115	19.1080058374192	19.4003830875625	19.5792393730535	19.1526429918412	19.5024229898862	19.7726236299976	19.8307188174331	20.0707848580702	19.57582993733	19.901316141263	19.7485247002145	19.2370499572586	19.6804665242704	19.3775671897884	19.2483067114619	19.4008032976643	19.4678168571713	19.6620602532018	19.0572770910704	19.5808837736642	20.1643627580641	19.4141209090844	19.3769424176689	19.3323664792269	19.3004127303971	19.4014124426409	19.8354044829269	19.2280377824347	19.2915814462709	19.4025539818068	19.3927516497046	19.5685638382374	19.6500793140373	20.222061221021	19.8677189074199	19.5315860037561
X2.28_1344.0308m.z	17.6138377405221	17.7311556525808	17.7832508727332	17.3839454946951	16.9299763081413	17.1529836651091	17.4664445391918	17.7655575277731	17.2196774946075	17.9105994866101	17.5284025951706	17.7127867644787	18.217800902305	17.8573995161416	18.2188114493616	18.1664796511534	17.3372904700463	17.9259049857885	17.8112738167034	17.4927056077832	17.4252241105631	17.5176185685121	18.2568957239199	17.3134706978996	17.4732568808829	18.5204292565983	17.246752472209	17.5880993588915	17.5633186294236	17.4707090705802	17.6113624338242	18.1152428472142	17.3186633822695	17.6294414746259	17.6256954489611	17.8842771523022	17.9021474938489	18.2345697583893	17.7708560394877	17.8340325423795	17.7593680343399
X2.28_1024.0189m.z	18.4401432884117	18.1475637554062	17.9917731876032	17.830847085162	17.7368782076541	17.7425701132924	17.7459972056776	18.2686663600568	17.590998851858	17.6864532504791	18.2741087983199	18.2086222904058	18.3905061430329	17.9268558278252	18.1390639277864	18.1400724600957	17.7384472210524	18.1717473571445	17.7991152279286	17.9949472308168	17.8962935619847	18.0003254645949	18.0000433149012	17.6757386294137	18.0328909685711	18.3829567048138	18.0970548453574	18.0212368073932	17.7003489862633	17.9886129521191	17.9727254900159	18.1681236229149	17.7949210065601	17.7090971820937	17.8157693463673	18.1842830832537	18.1515424659467	18.0977902024034	18.8054729802342	18.0510250396929	17.8700530265192
X2.28_1397.7826m.z	17.977985412989	18.0414492793181	17.9656475705401	17.9542200475158	17.5074533392346	17.5279293701289	17.9339244990147	18.1057318188819	17.7156877718582	18.1835991467469	18.2584210082101	18.3416164724368	18.6654474752184	18.1082368927447	18.4207560541871	18.4238336074522	17.9191645137207	18.1697190655723	18.0738416389347	17.9675241427954	17.9964311067419	18.0893929194634	18.4470937441834	17.6201909423047	17.9654484677926	18.6522608166578	17.7077283890889	17.7508753957835	18.002698230069	17.802664058928	17.9320510069284	18.4404695559257	17.678068036804	17.9468864363575	18.0925626489617	17.8088561830223	18.0678394697191	18.3186500513467	18.5095703124462	18.4702924201393	18.0998899023487
X2.28_1185.2716m.z	16.9995768116667	16.9760484017038	16.8274192507709	16.9186577540969	16.3726423155944	16.4694914260829	16.8071509645539	17.1449439568555	16.6073351738285	17.0486345917918	17.240216300555	17.3053486703668	17.6680516512047	17.0844758906904	17.4168559226063	17.3002942674833	16.7784968624878	17.3919092335978	16.9086950899214	16.8678836464315	16.9518950935169	17.0299914579186	17.2924781499161	16.6514341102023	16.9508949562379	17.4289595093593	16.8541403658329	16.8803565669367	16.7644166669431	16.9683848241308	16.8171699201767	17.3178147397884	16.7147965623438	16.8786669285518	17.2051243920813	16.8487482667358	17.19661051894	17.2489971046911	17.4360178591284	17.4034804158454	17.079489902932
X2.28_1051.2673m.z	15.6827059351546	15.8150269276341	15.9089288565396	15.450413809922	14.9262375052704	15.5006477877058	15.5898739787754	16.0207928259321	15.6856235527738	16.1603439512274	15.7933646551476	15.8866141970608	16.4781206723942	16.2693027436517	16.4079997519599	16.3580574763424	15.5976168219978	15.6629210022229	15.8094401955232	15.6218349486773	15.5183849847231	15.9066758187923	16.3050408354816	15.3831536754668	16.0249312526418	16.781385194287	15.1132271469162	15.5479235106848	16.0980171531048	15.6698140253965	15.8725840875928	16.3433798625854	15.5935761390092	15.8728242342965	15.8510664249626	15.9589157984208	16.2624056583088	16.6808617715574	15.983671035756	16.1312473102862	16.0537773681427
X2.28_1405.5395m.z	17.6502145638781	17.4191566112398	17.1610333892329	16.7604478121426	16.8964022090292	16.710901003185	16.2747251852369	17.0774631983976	15.9396878864949	16.0699489419692	16.9199504200103	16.7453011130014	16.7334484222166	16.6609799014096	16.8247913675386	16.2390445014252	16.6387926555852	16.8605100076982	15.8241157600135	17.0955863760943	16.4162336753997	16.5104432583428	16.4579349238469	16.9629083294165	17.0493333567327	16.9480101325115	17.4494503622967	17.4131172551429	16.3085322106603	17.4242922636223	16.9185904298321	16.5120381021622	16.4657845145694	16.4341846170126	16.2688726365298	17.6294453671724	17.430262848051	16.7596138803823	17.4345927072567	16.8706098989299	15.9582437246242
X2.28_1410.5350m.z	16.3358973517277	16.213763778977	16.1786507562007	15.8023196247047	15.527303117198	15.8347182170718	16.0074955487369	15.9520521838977	15.7613355060131	16.0330649155274	16.0495899278174	16.2806339087019	16.4492338890613	16.3071300924172	16.5831633274297	16.3214740157877	15.6686189451109	16.1322047010611	16.0170214262993	16.0558773617194	15.9532849731751	15.984278015807	16.0751990317339	15.8666389614594	16.3593156872147	16.352670838175	16.0512314145815	15.505869504965	15.8810693441415	16.1361371241663	16.2192924431982	16.2479113616302	15.671641423945	15.7665574893205	16.2024643221837	15.8434010515321	15.9484146738491	16.1644167617158	16.5567426702848	16.5147932325408	16.2264613423199
X2.28_1408.7878m.z	16.0102240492444	15.4293841225669	15.281445593866	15.8829680353278	14.924324105653	15.6974236851312	15.6440562240732	15.9652326419215	15.4262950410652	15.76208503574	15.8265682231824	15.7332684465115	16.3931814006496	15.8568261681632	16.1264442029774	16.2597589442175	15.6866939822708	15.9461378274002	15.6168189183794	15.7870943967602	15.4084963277319	15.9224891226853	15.8231348364747	15.1706940077923	15.6681351568169	16.0889098187157	15.415857518158	15.4079831682423	15.5220416238141	15.7023499934126	16.0168046664344	15.8816750401648	15.5714643106432	15.5623198623515	15.8099330328637	15.6962072548813	15.8917983241274	15.804327675974	16.0969862884105	15.7473568468383	15.8258472753598
X2.28_1115.2738m.z	14.9716474072015	15.0941429849258	15.0183602591924	14.8515474245971	14.4797064311969	14.578810983246	14.7063771407599	14.8114086876115	14.8747905834897	14.8870018750218	15.5539187345853	14.4932474787858	15.0356650816334	15.1218751425738	15.2840065891501	15.1322634108427	14.8320039373604	14.9120179647749	14.610539434524	14.9641854506529	14.8725719392311	14.844242813879	15.1296068876827	14.7136010284874	14.5213626177599	14.9996869432616	14.6992637437541	15.2032983136055	14.702468895935	15.1370465670114	14.8018484527435	14.9645170133298	14.647724784017	14.4858231853366	15.1330064896008	14.8739014687584	14.8140986789317	14.8693205972862	15.5199274528253	14.7577991479138	14.7412123834287
X2.28_1263.2286m.z	12.3670914069587	7.02841571855118	12.6492626116299	11.4959956533885	10.1646452805817	10.899888323021	11.1994646833109	11.2877778525721	12.2540786360719	12.5132352275487	11.7818707385682	11.5895945264567	11.7553532080726	11.3131441171961	13.1438009418333	12.6518489266213	12.6742117828329	9.96611483519801	11.3761740623151	11.6887995244034	12.8778358589803	12.053535654638	12.4739462606512	10.8898884108928	12.3352048632864	12.7296781971818	10.2537895368642	11.6440622274908	12.6688829714955	10.7664051971655	12.0852348832995	11.4282719243757	12.5408776671862	12.035465420344	10.3123366521894	12.2729385109882	11.6712318131629	13.470079002632	9.98005358507952	12.4240237587353	12.4382421907598
X2.29_984.0084m.z	16.3382469411655	16.6179592690825	16.4351500094872	15.880206249022	15.7023480900827	15.9644796597774	16.0456642062729	16.3804502922454	15.8202842975895	16.4360675305091	16.2808396358992	16.4175626879378	16.9219407955739	16.4493413877055	16.4822254442855	16.5344855177335	15.9529808143588	16.2583178208574	16.1899642696557	16.1271319250091	16.1382985167666	16.1169432993453	16.5748555259636	16.0190479380944	16.2677916646862	17.0243477703463	16.0673304040554	16.238285356966	16.2246916650924	16.0627637420042	16.0775209838346	16.7145015729039	15.8940885367094	15.999639308729	15.9750101546777	16.2883134117475	16.4885910540414	16.6391281193475	16.8633687726798	16.7373185423198	16.3813007674515
X2.29_917.0123m.z	18.2919393407518	18.3694501548774	18.1149291261725	18.013927880466	17.6650794434646	17.8525306675243	18.129852551521	18.3163750591137	17.9869045789722	18.099854818109	18.5356727891415	18.4677464938143	18.7411639167773	18.395604339175	18.4241106995471	18.3725349855824	17.8603732074564	18.4535200584884	18.0168838095037	18.0426162002162	18.2041749622038	18.2255673243054	18.3135420787193	17.770436653983	18.1966773577986	18.6848514066786	18.1273954897408	17.9460877762901	17.9873806411705	18.0708108995977	18.1200133403245	18.3978065774804	18.1817350195525	17.9865078647765	18.1075447653322	17.9880860341943	18.3253802578169	18.1851865879757	18.9098279805172	18.5355644496945	18.2900538757461
X2.29_1077.7680m.z	18.2718457690813	18.4315296500355	18.1339636858861	18.1633948320589	17.7362860513633	17.9052495978742	18.0050643606713	18.2932596108709	17.8744898613373	18.2330178614044	18.5564079288067	18.6187854354846	18.7795661143144	18.4360581829564	18.5843257226722	18.3993428295276	18.011983686182	18.4935517166215	18.084220433445	18.2204057157717	18.2545781409464	18.3563065810527	18.3567575171752	17.8636093947978	18.1545666680921	18.7323726536858	18.0087288993951	17.9449314772739	18.1048574612822	18.0659978598582	18.092665718943	18.4767728090501	18.0938989342521	18.0875445943157	18.1981520638221	17.992024615776	18.2556603282883	18.342464100632	18.9699888155471	18.6059349105884	18.2613932519304
X2.29_1384.2817m.z	17.9343106772329	17.7250472280364	17.8072495478188	17.5933619341875	17.2275100641582	17.4331666155589	17.6749743241193	18.0653785203827	17.5809287298825	18.0314617566482	18.0295532667054	18.078234790603	18.4816762559808	17.9873633915905	18.4807938795324	18.3576252601813	17.6690335410617	18.1895729363996	18.0608909623834	17.7531627075075	17.900410706795	17.8461967154559	18.316208050137	17.4494906927945	17.5331588042079	18.6868327004381	17.4343692471868	17.7638512125929	17.9721785789871	17.442812548664	17.870533195147	18.4316934906962	17.6630286250492	17.8048184914469	17.9376301199526	18.0143211953436	18.1264045301101	18.3975575585651	18.0966639087703	18.2793108801686	18.0916757028281
X2.29_863.5096m.z	14.5375765961363	13.6940994749573	14.6951036035374	15.0266760654461	14.1068955054399	13.8491607751079	14.3549536127012	14.6507452853342	14.5845059738803	15.1386770805992	14.7061309614144	14.6263503747255	15.2450804008255	15.1373430075728	15.6202804158308	15.6378867843847	14.6945373212106	15.371304013388	15.3602447586795	14.6644425162239	14.9433434387922	14.4749131190927	15.0638327496882	14.442619900716	14.7109069627002	15.752515231555	14.467919185384	14.6211757049692	15.2240871331575	14.8860670294017	14.7978601495299	15.2689198410162	14.5026123418088	14.7077008623801	14.9894524886499	14.9834959587964	15.3661952903571	15.7953720920485	14.2766359491106	14.7380375383548	14.9896055942348
X2.29_917.7608m.z	15.2123714023891	15.8041331736163	15.1775387625389	15.0218924118	14.624696450963	15.1301831133467	14.9660222441061	15.4015167576588	14.9569264869538	15.4877850548571	15.34596134228	15.5504126708326	15.80127107058	15.2856208966874	15.5098360937145	15.4713676525041	15.0917729949634	15.2367440776608	15.0663931062394	15.266850340966	15.137028697039	15.2406541695404	15.5316602269006	14.8159939939751	15.3497010183433	15.8836057830314	15.2078619736474	15.3726363161039	15.1517833762793	14.8274586621367	15.0547113307111	15.7069191717683	14.8408866315727	14.9315772414834	14.9689835572669	15.1357522569628	14.9493049933565	15.6700925589261	15.6867772030133	15.6752492464228	15.4941555506097
X2.29_1133.2672m.z	13.3624415346986	12.9816853638846	14.1453686004272	13.2688133275784	13.2973956017613	13.2728713190474	13.6504994524118	13.6923569250881	13.3372869194105	14.0044408634748	13.8846242983529	13.9775022734464	13.8899829777814	13.962599817975	14.4719071685124	14.1694163478582	13.3152852344079	14.038165626495	14.2565891535097	13.8235132081044	13.8092364097547	13.7139800003164	14.2644073138882	13.2915366142521	13.8591229061059	14.3726373851214	13.5756973923938	14.047611845188	13.8882502929323	13.4346483031439	13.9916426916808	13.8478513166607	13.1830432637456	13.7041956297319	13.6189784178324	13.7332800298338	13.7157767294783	14.5678017348377	13.6440506411557	13.9028056034076	14.1504149432272
X2.29_1260.0318m.z	14.2010443494152	14.6111847084435	14.4919277474054	12.7100981621367	13.7302151766511	13.0929162939195	13.6135434160981	13.3279677906159	12.8358612503462	13.1264999124846	13.654139222333	13.3618772560974	13.6898003382024	13.314016268625	13.1751464433258	13.1721937265301	13.6043740714925	13.3017037369851	11.7541175639498	13.9373785091226	13.4295963466585	13.1415042909452	12.6853944891185	13.4769001359045	13.6380931090687	13.7271231853773	14.1481784572452	13.8843234291253	13.1204375871995	14.2190670805358	14.0416642626617	12.5361789285191	13.5236640895436	12.8279201332576	11.5834856971552	14.1366858101577	14.2205888743589	13.7407753618801	14.3534078763518	13.4006393406898	12.4639403653587
X2.29_533.6609m.z	11.3591162167216	11.7394803256845	11.928905494945	11.5674476650557	11.5425185321904	11.9011206315524	11.8551175691067	11.7548690171014	11.4453877254954	11.2795442496259	11.0922160452564	11.917480772023	11.1601252099423	12.2364827874532	11.850242118122	12.4302735824459	11.9496245834628	12.0945185201491	11.7589401227041	11.8843658638543	11.8712161722307	11.1665255317452	12.0279940887165	11.9529946652416	12.1233111436016	12.4464286728043	11.4966624856521	11.9462817100713	11.8385389435654	11.1228148174112	12.0802068656931	12.074460633252	10.8384516496342	11.4904326995284	11.9107675883077	11.6019752142226	12.0919667680429	12.2628058753915	11.6022198068231	12.1131783778415	11.6110593022919
X2.29_903.2620m.z	16.0383212559942	15.6307521352524	15.895238898664	15.797214497483	15.4417206039084	15.6689026051399	15.5444105949817	15.9045441704633	15.6841662610387	15.8499810954674	16.2276698743009	16.0386865699199	16.3439228233845	16.0167797545855	16.0824658462808	16.0458300992023	15.7356356834433	16.0765466876697	15.7221248889546	15.6120838158591	15.8728938419448	15.6424118318769	15.9423179569692	15.5537079252838	15.768210996027	16.162770290676	15.6577977958891	15.5915203113662	15.8317121316533	15.6927688195856	15.8032653909556	16.1686591171092	15.9257193029802	15.8186330546637	15.7077080976764	15.6777473578713	15.826118164086	16.0286694763113	16.3624231667326	16.016749721482	15.9115371838183
X2.29_1421.5386m.z	16.3674842775319	16.2586488022326	15.7925306703758	15.7126514036967	14.9113656338135	15.6814688879869	15.5870306731242	15.8117179459393	15.2829463848134	15.7296508896304	15.4636281561005	15.439135679824	15.5469294672106	15.654805534188	15.8664615344611	15.7764300667361	14.9782321480303	15.6604169265903	15.1836719644418	15.726958417652	15.5158827649079	15.4586458375661	15.485183837114	15.2083918667447	15.6637954696442	15.8178395834671	15.9005324348665	15.7784406805808	15.1269987327998	15.8331611454055	15.6162757913318	15.5709125124008	15.1458114754663	15.4321385006844	15.6248035156167	15.8503083114895	15.924905781803	15.8304884053165	16.4205596627348	15.8954509148577	15.3334714242708
X2.29_902.2635m.z	14.8862224514887	14.7878589910876	14.87847806949	14.9797501117652	14.1221566253606	14.6961845088171	14.6230569675881	14.9660075619511	14.48286803939	14.7866832568824	15.2811893079041	15.1518346679084	15.3921957581569	14.9432044221606	15.2981347170608	15.1934047220577	14.688900909117	15.261117750395	14.3533378233843	14.9832364541448	14.7717974005545	14.8697492705674	14.8772271812511	14.4294704098044	14.7264921329736	15.1009580245083	14.803684250309	14.1950197975061	14.6590940739091	14.494032938074	14.9836160859506	14.7886835685137	14.9592937559187	14.3886008735735	14.938603989879	14.7575144038971	15.0785913376364	15.2024245910729	15.200813602542	15.1073133642068	14.9182638578594
X2.30_1105.0189m.z	20.3109011209746	20.4228480351849	20.1197821162434	19.9515864537296	19.5962761704005	19.8790042632049	20.0543716959795	20.3210382085088	19.8969551365717	20.1429712831612	20.5446115795741	20.5569232958097	20.7173740987896	20.3471389797765	20.4219137831937	20.382708083881	19.920812373418	20.4131510437031	19.947467540435	20.0958575889833	20.0936104523728	20.2062632136515	20.2934506629817	19.8339084625736	20.1744926317228	20.6898588957911	19.9903897671962	19.9613755038975	19.9773468182574	19.9612802073733	20.0917813721636	20.4079479461522	20.0690894023711	19.9589123253835	20.0566240822412	20.067363986227	20.2852049185386	20.2981219562679	20.952688543436	20.5561946618203	20.2147840967189
X2.30_1397.5335m.z	19.9002101627144	19.8930408662005	19.6702710159048	19.6541618456985	19.2690570354369	19.4655658950448	19.6381767206864	19.8957501802842	19.4413095781715	19.8559803565251	20.0802753802786	20.0256546260695	20.4130370595337	19.9234876708931	20.1466799637661	20.1002971911606	19.5236260205771	19.9921369966313	19.7173903252513	19.6425396564098	19.6774823928073	19.6972965190542	20.0157066794284	19.4414447796095	19.8018707389045	20.4829013195368	19.6396929578195	19.6631562137453	19.6189829677337	19.5515474928351	19.7248521008499	20.1456453892299	19.6749627762222	19.6657172790263	19.7953598441481	19.6421444416658	19.8722229686348	20.0650867407388	20.3748402977635	20.0579559421895	19.8570336265573
X2.30_1371.5312m.z	17.7150218929304	17.8353422079271	17.9198244772957	17.7038753421906	17.0704297562013	17.4115921071524	17.611537732657	17.8629433390055	17.4512661029546	18.0413503007247	17.5532535385269	17.7601066479698	18.3924159169137	18.083920363827	18.2685428353236	18.4443855945952	17.7362414893445	18.0325956911119	17.9277730299057	17.7422405146785	17.7689949683414	17.7542362151646	18.3390977639484	17.5332176845095	17.6353866333098	18.5717242043334	17.4989341984093	17.8592884373158	17.7464889991197	17.7595118975332	17.7597215195787	18.2201125360598	17.5348401233643	17.7231454900055	17.7619732688882	17.9124505872158	18.1108664135138	18.5133134154752	17.5774528470023	18.0686181385819	17.9489737408468
X2.30_1262.6968m.z	15.8865152415051	16.3864478172524	15.6631812451118	15.7540800156908	15.2699729401409	15.4361702609737	15.8210747291334	15.8115263317528	15.5467023553631	15.9145447019047	15.9740770018582	16.0251154583165	16.2426247703021	16.0141948242148	16.281288248019	16.0961454551165	15.8332448116625	16.2524750411599	15.7811704784534	15.7281183697508	15.7581936800731	16.050709166427	16.284698685022	15.6436488554421	16.0861412773338	16.7805299406233	15.5164036190611	15.7402376122196	15.75403429108	15.5578692245801	15.5405932575822	16.3212377731441	15.6763840743266	15.7735536704017	15.8567112986053	15.728852192211	16.1414758110525	16.1462112117749	16.4246385723704	16.4516065475699	15.924683203289
X2.30_1091.5181m.z	17.0731063937488	17.0854205410296	16.9563299081446	16.9287794807007	16.5638668943458	16.597584212179	17.0500293820388	17.0951603197947	16.8404189565637	17.1718659527694	17.4469334273348	17.4521295286672	17.5714568983589	17.1760010386381	17.421122281177	17.3074543468497	16.7279696308661	17.2794628667147	16.837922616179	16.9570137239987	17.2128379490622	17.0321289151348	17.2616165846444	16.7028637971642	16.9867101332345	17.5312463215207	16.8694003281588	16.6889652797486	16.7665379259105	17.0786608666799	16.8862022317458	17.3704714439943	16.9415351314909	16.7953609831509	17.095349231758	16.7611241755884	16.9809178891669	17.3067958106549	17.6445174655258	17.4406644252741	17.1201660928068
X2.30_1371.7802m.z	16.9775883833845	16.8585100321733	16.6590766028606	16.6801774828407	16.2481112705493	16.5137962704972	16.7214145754337	17.0400774016066	16.7045173923975	16.7692621252367	17.0523425368201	17.0646453322721	17.4773442140287	17.1053414436059	17.170459207187	17.0385048344074	16.629715219946	17.1446988816785	16.9994693425678	16.5801996601897	16.7415445872128	16.9572532165067	17.2373697081054	16.4060482239754	16.8800524819678	17.3952986557706	16.614362496304	16.413202597977	16.7584527346676	16.686207939036	16.8934682367284	17.3212156855522	16.4073493629688	16.6521710545904	16.8853039400172	16.4967759008568	16.841360145911	17.0999321177976	17.2576164425979	17.2700238417603	17.1418172675599
X2.30_1317.2792m.z	12.6200706504227	12.3704367614656	13.7011916888826	13.0280409923503	12.7788160838813	12.9558233721985	13.2694592891744	13.1635302491264	13.1416602170427	14.3671379835378	13.1635519489187	13.5194774212407	13.8248180295878	13.6998472297457	13.8604365498576	13.9623831945067	13.0701968563378	12.8553084105609	11.4495092732234	12.8502760133725	13.5691048570412	13.4195730118669	13.6684546739834	13.4205086009371	11.8273259791072	14.0265504603524	13.0043869913727	13.5689159609411	13.7557959358859	12.5978079224619	13.5141146386382	13.1583648224594	13.2113198588503	12.8874570756775	12.7934887716182	13.3452722278852	13.5007166247015	14.6006307024715	13.4631166881182	12.6250643923564	14.0353531035172
X2.30_1231.4257m.z	13.8827560203272	14.2074850597328	14.4185422159692	14.0623082236506	13.4428231712605	13.4338136455639	13.3310137251706	13.6924871898053	13.4687277313658	14.2617200065734	13.2847117977766	12.6585772419543	14.4538656710126	14.3443810602026	14.365772306668	14.6216156124286	13.8796389418146	14.2115085135301	13.9965271642387	13.8428790873235	13.5605657955096	13.3822324270543	13.8765747733184	13.465531669781	13.3048573047032	13.8468672054279	13.841525077741	13.4789075534364	14.1271035250927	13.8342243999709	13.4926027273912	13.9578597464798	13.8501562022752	13.3745199934635	13.9311201575484	13.5222521401752	13.5171870987396	14.2331334809122	14.4101211106413	13.9404705723906	14.238330589738
X2.30_1393.5350m.z	12.9773283314199	12.2851353583746	13.053517737003	13.3968289901204	13.3049871259851	12.4247615407534	12.1918000797738	12.9510900265891	11.8148733069194	12.7907369571032	11.7031671686224	11.8525427461964	13.2647107347311	10.5764879111932	13.0688924841679	11.9718743805432	13.2496538748164	12.4022725589454	11.6764958403385	13.3836418288732	12.2303853286618	12.4651492863249	12.4491271374588	13.2816221240644	12.3288488002182	12.6783904287223	13.2466490362069	13.9187932159242	12.2189977123355	13.66638243734	13.5479819591724	12.9162341760499	11.7432003628145	12.0664928275441	11.194767736734	13.896804327257	13.9681628447023	14.0461096350959	12.3829576103948	12.4524984415642	11.3658354617467
X2.31_259.0132m.z	13.72905009827	15.0658561226061	14.2142280850218	14.2723157908706	13.7211687500134	14.0730256887025	14.0859024712372	14.2616165273115	15.2306589329386	14.7571876043341	12.3192711437679	12.8495932395498	12.2641207617058	13.6640401636161	13.6121888850319	13.9522556800565	15.6078837798876	13.6489336115161	15.0883296960923	15.4372869242803	14.8469169059174	15.1277380752109	15.5857318586974	14.8298770828107	15.6941002863628	13.3706110957016	14.8963504413092	15.6870718474086	15.3311154239383	14.8801557318416	15.165574762971	14.722406393553	14.9486525637725	14.6935021933622	14.6073214868927	14.6578907692462	14.7293145670304	14.5766480829729	10.9456201795441	10.016821543779	12.2323896707253
X2.31_890.5106m.z	18.6995355065188	18.8963954236719	18.617196956318	18.4649065167003	18.0390823211502	18.2539252574397	18.4485661046352	18.8176059400123	18.3922833777758	18.5741928722198	18.932205329976	18.9354150946908	19.2086052660862	18.8159318650639	18.8335291906606	18.8034351826716	18.3091526740965	18.8047633783789	18.4499004973396	18.5767432931591	18.5342654021908	18.7008963301566	18.6823053200773	18.1794338979552	18.6100140035701	19.1024969516161	18.4442041880188	18.4224761563714	18.3415417054847	18.3815921087275	18.6333547396428	18.7972086054728	18.5502181784811	18.351027190037	18.5346670566156	18.5555920360103	18.6443835162205	18.6205418857085	19.2873969582695	18.8421794883227	18.6370006765714
X2.31_1117.2712m.z	17.410230510658	17.2826433467505	17.5384542964905	17.3271763330326	16.6681187865846	17.1555646593176	17.3763816804046	17.6211396081515	17.052421337026	17.7481149116121	17.4060069516335	17.4208525541749	18.2486627095374	17.6721843811393	18.1396182411556	18.0892542545883	17.2862141070508	17.5991229246718	17.6966941414581	17.3718319418114	17.390204274619	17.417743859391	18.0735438996904	17.1894858864121	17.2612187933004	18.3947273101782	17.2033315529583	17.58468735885	17.4959783271596	17.4179368272229	17.3907315346179	17.9427629676218	17.2202506981044	17.3985130663681	17.5541457778247	17.8118240009258	17.8681424163912	18.1271502269221	17.4523395811927	17.7744555863944	17.6936207172304
X2.31_1317.0301m.z	17.8410125855329	17.8809650153747	17.7160886851056	17.7582749592794	17.1922246277026	17.38256616005	17.790612250212	17.9919137575885	17.565079891536	17.8332812865707	18.0384057297646	18.0501032388478	18.5485360548657	18.0636350538599	18.1685863390198	18.1974441309356	17.6121574132147	18.03214435678	17.7770755175153	17.6363034323622	17.8995475253524	17.8520381230378	17.9680772371056	17.4135662465466	17.8344325637379	18.3047072484864	17.7777563660243	17.5064496949585	17.8719963080383	17.5774303365078	17.8701539214041	18.3098205610368	17.8840396563177	17.8714323373433	17.9427974933688	17.7450146556989	17.909337904217	18.1639578665287	18.5817078540713	18.1521354595682	17.991165225215
X2.31_1398.2816m.z	17.9665193580622	18.1103920126211	17.8317380921818	17.8032474066128	17.2947612117963	17.5483359445106	17.7301011308307	17.9565176946056	17.757468140036	18.0801880699152	18.0969070399401	18.1822904577697	18.5501044013521	18.1091269805862	18.4497743777091	18.291158036566	17.8941632636152	18.1884999100578	17.8745688123375	17.7144731094193	17.9884297881337	17.9312841418434	18.1374257468021	17.5188356572743	17.9250294303427	18.560708120764	17.7766825708434	17.7792269339845	17.903830256676	17.5793999058079	17.7479466056847	18.3140009917989	17.8144039487848	17.8294563260019	18.0216084456994	17.8459472618179	18.1267966779883	18.2294932354817	18.49032298253	18.3481929023286	18.0754468016376
X2.31_908.6772m.z	14.5050198046383	14.2585813321913	14.5212349176597	14.2627200551717	13.8147410452256	13.5336423557738	14.2974507704069	14.4845752641757	14.0090519071799	14.7839976381564	14.3623280673438	14.2877582719846	14.7777973217687	14.4178722525466	15.0445197773897	15.0696670432701	14.2458584931908	14.6248011273316	14.9349203482038	14.3168699961296	14.8376758980255	14.4242682812802	14.8096174120309	13.9658678909834	14.4495295523281	15.3255365934531	14.036427254373	14.3800758467695	14.441663011908	14.4281814264777	14.3133940925121	14.5828224643844	13.9796866252197	14.3483975046922	14.2493781838442	14.5633543332237	14.8203191544775	15.3166717386316	14.5414529947861	14.7351746682422	14.3959109231316
X2.31_410.1529m.z	7.7070123948597	10.249258859674	10.6619300406233	11.5533757141689	12.4312115591591	12.27967748568	12.4144757680461	10.1865683151081	10.7521251223719	9.92162089355835	9.37085516037145	8.55466595221565	6.74643542306043	6.56404153501621	7.10353717681753	10.3993574582227	11.2327810160076	9.12819507513739	10.5255913893303	10.5808904459967	10.7399414166409	10.5434730949341	6.74831977567269	11.0770781043362	8.62623630925575	7.39596938566143	9.57364575639449	10.0862967956594	11.7240710036617	10.4538529863182	11.4261422524683	11.1249829833007	11.7844749666457	8.76871842847937	10.741634364319	10.0755622169432	11.1093122763811	10.1781876839582	6.95538799793284	6.84171533354411	6.93912671959996
X2.31_770.7540m.z	14.4583221709979	14.6488862708583	14.6242526727732	14.5538807570276	13.9960970631437	14.384892513817	14.6466561630403	14.5978986554657	14.3861867331967	14.6490821279067	14.7279551274057	14.8562974467147	14.909430167055	14.883386235667	14.7541695097252	14.9078032091907	14.0721951879502	15.0760705856767	14.2229954133049	14.306247313568	14.6103519459993	14.4804956977951	14.6033278902919	14.1745732374766	14.5012414311003	14.9299119841715	14.2256348810856	14.0278432402913	14.503727201918	14.1661561157483	14.4898355692357	14.5432189346224	14.3795511466537	14.3682076389545	14.5134297420009	14.1954673303022	14.457142356524	14.6888207992711	15.1356802201235	14.6078116434132	14.5339281021211
X2.31_1308.4264m.z	14.4268126554408	15.1456150063617	14.8501915557592	14.7524060236564	14.9013853442731	15.3657733138024	15.0243432532212	15.2447225384421	14.6529753124977	15.2855433688641	15.5978337552716	15.5912950358236	16.0408564177904	15.4404671839006	15.8846134557444	15.6839653375932	14.7836001267949	15.6629119019419	15.4460936036588	15.2613978874815	14.8716764809585	15.4826206835918	15.6646623787937	14.9701013223601	15.505915340876	15.9608427379843	15.3072147363175	15.274381519915	15.1621347634598	15.129307951482	15.2441522920794	15.3094161932162	15.0185961135853	14.9551377417238	15.4582096742964	14.816908710787	15.449656773289	15.7579190431321	15.5568183716808	15.7834434691511	15.2208531564421
X2.31_1331.7801m.z	14.6611369826509	14.5402169689947	15.3216088227515	13.6831861193971	14.0602706514537	14.0571813377609	14.7915607536238	14.7345442621962	14.4644721586055	15.2941155275249	14.7192835878395	15.0506294211069	15.2745458605509	15.0252977352524	15.2495772990716	15.2399405969304	14.592706928657	14.9624650485238	15.3338218193351	14.5472014496836	14.9692379351989	15.106046998119	15.2146269135998	14.8630263278682	14.2699311314966	15.6953484044536	14.3362062927236	14.3698265062261	15.0251180560549	14.5340083745399	14.79478351014	15.3785985777637	14.7947582179713	14.6985948481194	14.7734910811451	14.8258404801755	15.3411832396842	15.7352627532233	14.9062988595214	14.6529519366832	15.0265585951031
X2.31_1286.4253m.z	11.7795956583143	9.08746627545099	13.4536374673096	12.5524265834819	10.6181286097793	9.10150436669567	12.5711664108261	11.5061094918223	12.5387088115177	12.9574678365221	12.0264885878002	11.1359960426784	12.2282065062791	12.2869155746509	12.5796267652627	12.2636032158325	12.6885995096883	12.7860934148683	13.1408373736832	11.9770946617308	10.5749334621187	12.2972392143074	13.0536467181845	12.5120348480094	9.93364533148196	13.5180598217959	12.4909034947342	12.2672422247637	12.1440303503942	12.5929035620292	12.3964761249359	12.7207998267906	12.2719903437157	11.9466559570462	12.6317045512692	12.4825328970052	12.1141724590254	13.0358613506486	11.7191035129402	11.672473316493	12.9767086375359
X2.31_1395.0350m.z	14.9304552668426	14.7379303713214	14.5454312556681	14.9749866463944	14.8332873327936	14.4271155025074	14.5293278867391	14.8907228614717	14.5898655948994	14.7271282697284	15.2063411932547	14.8289148151372	14.9730488133801	14.3434204471968	15.2326548607446	14.9114980637698	14.5444102915613	15.076592667132	14.3158179148331	15.2833793468699	14.3756172680329	14.6625587836939	14.8355323404124	14.9531370524742	14.9278250618189	15.3572074889241	15.0805507632293	14.67646820372	14.998693547351	14.9811396418242	14.8488490187245	15.3371729513646	14.4046846138802	14.9310216862616	15.0635627304941	15.0995767204344	15.0737370692223	15.3772103841603	15.4693458923414	15.1196478173271	14.2053808229109
X2.33_956.5626m.z	14.6822458105196	15.4364069464266	15.1851804320451	16.5318653047068	15.8180344725745	13.1663253585014	13.5885939800902	14.7334641834955	16.4660849723911	15.2261616628106	12.5408368946827	13.1642126204603	11.4845580363913	14.6327718989714	14.7145306795385	14.2826344035802	15.503509371752	14.9963041720956	17.4397165014086	14.6201452527885	15.7915491249279	14.1328715280025	15.8505469440045	16.6337583280845	15.2518362274271	15.6191432315393	15.7774869399405	16.1252880543139	15.9938832819393	17.1933298128582	16.5373711484904	15.3543800126529	17.114303730195	16.5157573509691	16.7689823303432	18.4700811710023	17.7845269317388	17.5884240781106	8.02126562219907	12.3399956673276	14.7749014124325
X2.33_1010.0154m.z	15.3622591882606	15.4275752962187	15.3655208488699	15.2756046857074	14.4535721566376	15.0783591261769	15.2654077320109	15.3439129504332	14.7301640401174	15.5368572037183	15.3100423127293	15.429490061313	16.1032507203914	15.5526008207457	16.0143706530955	16.0166239008154	15.2150695660403	15.3586905479506	15.5453343627485	15.1400633883215	15.2710575233535	15.4964425685059	15.8967502639265	14.9502904555204	15.2776785188687	16.2292730907378	14.7682740446108	15.1919575719746	15.4342225471887	15.1254720208578	15.3416467218657	15.9284723159093	15.0334197887876	15.1959590535693	15.5424701516355	15.2192307403403	15.7014249473562	15.8767589850099	15.2215414857821	15.6705876065523	15.5527082193245
X2.33_1145.0199m.z	16.9555818258974	16.9336459640891	16.6729068652358	16.7797029721684	16.3660047338577	16.4637025463889	16.5409756837571	16.9538587912593	16.3194682212907	16.6711730842205	17.0734671122965	16.8882376774455	17.3799633164459	16.7888771851573	17.1205097807311	16.8956938878285	16.4976224599129	16.9293122471236	16.7125154947397	16.7026508904817	16.57273294531	16.6228149401427	17.0121930944817	16.2863472653336	16.6920121977563	17.1813629183792	16.4552217925468	16.5042869230091	16.5869608588667	16.559276293574	16.6470599094942	16.8072797602152	16.5895796901103	16.4847961827655	16.7902917128356	16.6444026630259	16.7238741358034	16.9810673339996	17.2406007301585	16.8855353379606	16.8030255442863
X2.33_1372.2792m.z	16.8352198720639	16.6934860308089	16.4730992204997	16.4566047586262	16.0136206835781	16.2604581018747	16.5106934889391	16.8867478988717	16.5302198102737	16.8791049443434	17.0758434169552	16.9660968744889	17.1743159921966	17.0729141092827	17.0940044618388	17.0676484467435	16.4552665422967	16.9620795825791	16.946207543761	16.4493714348666	16.7860991221674	16.7062859373374	17.1445385540252	16.4209401604831	16.3919807668118	17.288452289231	16.3641113569406	16.4604754706239	16.5011460694178	16.3129354739941	16.7224400264939	16.997210245464	16.5517465107544	16.4095299731144	16.7238641099012	16.4712204061877	16.5217328183439	17.2295037673924	17.0026611980573	17.0144879112034	16.8306426557354
X2.33_1345.2783m.z	16.0666412205698	16.2156869361952	16.3019529435041	16.2765065994471	15.6469475985148	15.9589526623483	16.4459027169213	16.6084347966018	16.0622633926106	16.327929244043	16.3698555446999	16.8733229344568	16.885439607616	16.3379473414113	16.7762090921821	16.8482157715409	16.0543923421623	16.6030497095916	16.3871394417437	16.425282273327	16.2669477501281	16.3300801789113	16.6065610521371	15.9556098698244	16.4920581083708	17.1065200493744	15.8568717284429	16.0883151233098	16.0768804260071	16.0130470966844	16.4034633009122	16.7165437181302	16.2872851764119	16.2648459233775	16.4707941315417	15.9386214752745	16.186619539712	16.6535286292932	16.3720600710423	16.6244176905773	16.6129843048219
X2.33_1383.2837m.z	15.1514540212524	14.963065324	15.1290626732506	15.3370352258195	15.0342950767193	14.8232847864416	15.1937911286122	15.158501090149	14.9479914512992	15.0515652138531	15.0553307249501	15.3984695451549	15.8907664927635	15.2854861475495	15.4896715719734	15.285854512	15.1995159535876	15.8212495610779	14.7821813857716	14.7464792851596	15.3350961101174	15.1550443102614	14.8659062358193	14.7513581225903	15.1139224792844	15.6210890057162	15.1389632791777	14.8611719320134	15.4135398225705	14.9773898028747	15.0949075581617	15.4238793208256	14.4404598489608	15.4865076119489	15.3353989862344	14.5411643201291	15.5799130568075	14.9722285433805	15.1511818516656	15.5957841453751	14.9193480722432
X2.33_1394.0339m.z	13.8028376122557	12.9001982982498	13.577771067414	13.6921057765521	13.0275482521019	13.1221697873733	12.9518949887816	13.3539390344098	13.4983867207719	13.1930167299604	12.8007553389769	13.22991351131	13.3758352064542	13.7011546162135	14.0341417822257	13.8919415006716	12.6757101880697	14.2024032923801	13.7542987886629	13.4153644648701	13.5251665186674	13.2398920433169	13.7677116976933	13.4300019283586	12.700207617839	13.7905312470658	13.5913073831665	14.2888771299253	13.6041704062464	13.6603731208082	13.5103781837315	13.1614961975356	13.2262368047816	13.7869620082225	13.3778314388035	14.2038699207688	14.3298975133472	14.2189449691854	13.6154707685645	13.2201589442369	13.3273459041381
X2.33_656.0047m.z	9.66049200917469	9.19641324402774	9.68239131811329	8.90285686847315	9.25816634626877	7.38309820095968	9.15326295848262	8.85910012448955	10.6919098233817	9.93801941713534	10.0371715714989	9.84761824807984	9.1218958810807	10.167197477756	10.4632862083946	10.1650024972407	9.17196468544017	9.30566624734132	9.95099063398356	10.0799125596475	9.52639951854611	9.51940980828449	10.9431815236568	9.18524722679904	8.7977639971929	10.2875314151021	8.58752517186986	10.4536450865645	10.0416594605434	10.0223529998575	9.56549860746233	9.00075895488883	9.80185507115063	8.98691389589039	9.9263665523328	9.90908976083532	9.59556657618043	9.71692166956073	9.29742079239426	9.85148466410322	9.79536513296209
X2.34_277.0237m.z	6.92335450412534	9.58692298522863	9.81210475474163	12.4610000285848	14.1425607010093	13.6362399634684	13.2189828858011	9.93191756054219	13.6389024679068	13.1885147121113	8.40502115436461	9.28596264221135	6.70647528698899	11.5189810360686	11.0823300628418	12.0021501046207	13.957069155956	10.8318547274667	14.2153560807582	13.4569270010839	14.02081799054	12.6286232843289	12.6354766388941	14.571995785874	11.6315820340969	7.00836270326304	11.352222025104	13.4020673743233	13.7986188603732	14.0670613782572	14.2365796499497	11.9670512604785	14.5730273835137	15.1155585998956	14.0397674467724	13.7389842116413	13.4820924557501	13.0660915793296	6.87129855332763	8.18137011723716	13.9988035822409
X2.34_1031.6865m.z	15.3946655764984	15.4663071541299	15.8511979905671	15.1693226587018	14.713495524406	15.0018254134695	15.2974558945805	15.5558687293433	15.0991659275228	15.8990393735534	15.4506291859327	15.5008480236602	15.9000268934833	15.7271132904067	15.9979608294853	15.7781956114901	15.3332132222453	15.6579960279208	15.6325108578241	15.4078592509455	15.5860257896582	15.5041101795315	15.9186433337805	14.9876828815979	14.861624681785	16.1061666321191	15.1114907568773	15.4980675696313	15.3858304848051	15.1897752541576	15.4071812798718	15.8327191185081	15.2734877903241	15.2176911691854	15.2769738058326	15.4869546399566	15.6896999725543	15.8830944929658	15.5015449111204	15.754604997118	15.6454412395332
X2.34_1224.0212m.z	17.2825103569311	17.2459519407683	17.1024347286583	17.1238034358917	16.4708294154447	16.9025448998979	16.962039198705	17.3552832401121	16.9372769400299	17.2610149252453	17.4776437129193	17.3480185159083	17.6841349975181	17.2818098020909	17.4534076108127	17.4274402789114	16.8983880791589	17.2451538402746	16.9966467821508	17.0938367782469	16.8932395682218	17.2681137642595	17.1822871719457	16.7929056567042	17.2171926462079	17.620347906058	16.9259136293073	17.0461829010455	17.1161030491032	16.9518415404619	17.1198620400531	17.3968701059899	16.9008519769059	16.9624378740098	17.1392334991584	16.9511432076679	17.22915644088	17.287657441906	17.6163384778187	17.4714493511677	17.1012743596165
X2.34_1436.0352m.z	16.3193261123585	16.1773007606028	15.9275695324312	16.0119840604552	15.8518003166513	15.626279704588	15.9676528486408	15.9242147243749	15.4560898700348	15.8756967676706	16.1596012170478	15.6966637260479	15.8566268190493	15.6611071201501	16.1921020600642	15.9394160015022	15.7205977722499	15.9960719011533	15.3920391749239	15.9295537699665	15.5786526657552	15.4763501933641	15.8308539336068	16.2415704955299	15.8138626851868	16.2483190620985	16.5287172562792	16.4094514916944	15.4861761742126	16.4950661244163	15.9680642025575	15.5890417814785	15.7033014613165	15.5913643583114	15.9096547013054	16.225079735296	16.0239958488875	15.8013357720387	16.5621516821033	15.7330916297683	15.5597537068994
X2.34_1158.7705m.z	16.1591688821705	16.0459921432485	16.249437158312	16.1543785067334	15.3374446370546	15.8077119178436	16.0311398970618	16.4036278411128	15.828508817906	16.2458244396993	16.6463878057105	16.4859602365866	16.8788609094069	16.4258767816041	16.5136511646501	16.4825354435458	16.1604063157754	16.2890593591295	16.14623368665	15.9788922824632	16.0338000969425	16.1242772179252	16.3616143509302	15.6531397728881	16.1800044824109	16.7066400122567	15.9928421433428	16.3483637849709	16.1021587059346	16.1085094211817	16.1618867175612	16.3922762909203	16.1323409894077	16.1584054514903	16.3176556244446	16.0285929031549	16.2067547201189	16.3966330596555	16.6726441023403	16.4514301497866	16.1684405288365
X2.34_1230.6895m.z	14.4775298688252	15.275282476633	14.9688868026157	14.433248193593	13.9361042142196	13.9434698120048	14.7081713806055	14.9871721792554	14.5229033678941	15.0515187000631	14.9784476532114	15.108713831952	15.1245181182393	14.9075141445651	15.1646689721055	14.9776209875042	14.8342922947239	15.1743939911583	14.8168782882753	14.4431030195845	14.3653494080534	15.4229824647592	14.9201435781278	14.5357587038596	14.9707516287479	15.2106552767201	14.6670363569171	14.1226858759974	14.6419486701053	14.5674626354694	14.7560289259776	15.0486003782881	14.71825563622	14.7712463085479	14.918769392738	14.6558053396506	14.8011046372907	14.9574765067072	14.6426567829424	15.3103675232369	14.9937808036633
X2.34_1255.8232m.z	14.7617889584695	14.6508008158923	15.0618656192413	14.5217026702646	13.5053763671539	13.8222646776494	14.6267028428485	15.0448611470856	14.1421992073158	15.0022155975347	15.021600258829	14.7575189188886	15.5178496423283	14.6513658447766	15.7160435513206	15.4113672013481	14.2400536460537	15.1280229544382	15.1127046276107	14.6765494535849	14.3944357014892	14.6926974618012	15.5795283942168	14.5958439446474	13.6145542946916	15.5536934830183	14.1135683375813	14.4536520695881	14.8341966020664	14.8162316283609	14.4875543102926	15.2796354935064	13.7844051855699	14.7214909427977	14.3429968564383	14.8853804249996	14.7637060606983	14.875572808682	14.5116550948117	14.8366927032136	14.9808370510497
X2.34_1232.2252m.z	16.0976033036264	16.3425852218793	15.971448153141	15.7545056204422	15.4124779006943	15.4993841628186	16.05225302785	16.005564370439	15.6652613267782	16.087518106152	16.1935295970573	15.942089998889	16.5822914353057	15.957620735074	16.3105134607369	16.3438415018327	15.3917011219513	15.9229816315775	15.4471748463127	15.8447948159356	15.7758882941556	15.8764162783562	16.1985876250615	15.6801041091012	15.6043869517519	16.6077958543759	15.4177507241084	15.2203593383833	15.6910231572887	15.5899703815788	15.6476097601842	16.1201435064415	15.4841461396098	15.9964357418012	15.9844075896136	16.0215647097397	15.9287172372201	16.2891683066388	16.2812298799574	16.2462277715492	15.7184976354101
X2.34_1229.2270m.z	12.2175137085246	13.6378932289996	13.2366849360198	12.4953191649452	12.9554617320263	11.8426931900884	11.7574317574493	13.7486123230867	11.0744355393883	12.4433254230016	12.7863466116869	12.6674865225545	11.6382204405485	12.8155686667074	12.52285952978	10.8671352565478	12.816434443365	12.9935183408874	11.180538666048	12.7035141984022	12.0234675037	11.6189832710027	12.0499877672907	13.3608158301559	12.468675563981	12.8273223904653	13.7176028059748	13.6216954881328	12.2670611924667	13.7018474388057	12.9485711105655	11.6265149170852	12.6302568658008	11.996911207664	12.4173804494853	14.077075632351	13.7616165072535	12.7095230878179	12.9858660732247	12.118145729249	11.8822528809659
X2.34_1075.5217m.z	16.5517172917082	16.481237272488	16.3799473951435	16.2367930984309	16.0483646612795	16.1180652002475	16.3628247776596	16.6318469160116	16.2172068727946	16.4237819140884	16.8245377858934	16.7373984805132	16.9973182261169	16.6886590082719	16.6849384118289	16.7038605849963	16.2227861979938	16.6877768994075	16.4291293106683	16.2937998617379	16.57921263998	16.6338163469919	16.6486845148398	15.9907522260503	16.4117748046996	17.0327474415581	16.3153694438486	16.1283342306632	16.1963426994554	16.2858395417452	16.4140695680769	16.6668711119676	16.4613242934497	16.2180293067691	16.4305421500088	16.2954847132592	16.3495104108016	16.7208087832965	17.1152281579609	16.6516099805938	16.5103119184731
X2.34_1184.2732m.z	15.2909456903354	14.5844977079055	14.5273045771484	14.8358098788897	14.1773655218585	14.9206675240083	14.7695706843264	14.7760818869549	14.7087158861804	14.994654204704	15.4323467082386	15.5850665813841	15.6724817096384	15.277299566349	15.3274059059192	15.2519922766091	14.8966694733588	15.4381831567367	15.1715232090101	14.577453673782	15.021599259753	14.9883967216058	15.222048018664	14.5736286541758	15.0996162224005	15.015252128597	14.5801722037403	15.2234125674841	14.9137793582189	14.8589595872643	15.1808173635108	14.9792839985612	15.1463278193208	14.7200995566515	15.3257512991482	15.0202458323456	15.4559777598711	15.2670271271993	15.4514733356709	15.2187773483522	15.0113690782365
X2.35_1424.0360m.z	21.3003798886091	21.3573111271046	21.0098794882386	20.8480466699	20.5568519367532	20.6735271534935	20.8969991753092	21.1529728592242	20.6180676701403	20.960249374163	21.2954456827811	21.3062910126912	21.5690499201204	21.107255074183	21.3240658488458	21.1778914079042	20.7113262883284	21.2200618984741	20.717374999991	20.9206850962829	20.8415451334348	20.9919486123292	21.1475099180928	20.6354539302806	21.1559998099783	21.5947925720284	21.05382195195	20.9732183889568	20.766967529008	20.8791118649884	20.9221183044522	21.3034733203215	20.7577011143044	20.8114403360948	20.8882386453849	21.0250323329346	21.1391307473963	21.1684749892495	21.8452101120439	21.3374414446046	21.0171641084725
X2.35_1319.0272m.z	19.1519763972802	19.2590905236996	18.9146523835798	18.8465208002079	18.5394620385523	18.683583668412	18.9061986171382	19.1917800006578	18.7568277495968	19.1270772698171	19.3341761722737	19.2970348073589	19.5417267704031	19.1677281759342	19.397990011136	19.293771244792	18.7286277394794	19.2408660272304	18.8097317232449	18.9261618160581	19.0532677636422	19.0589154994083	19.2236811194463	18.7595665980836	18.962171492659	19.5509617410512	18.8593751929235	18.8390648111528	18.8929094412441	18.9578406635051	18.7847361662983	19.3257314052131	18.8595507340973	18.7551157869743	19.0000659245244	18.9489681040953	19.1902492023404	19.3001818408244	19.7602148102018	19.3157881635707	19.0503021586041
X2.35_587.9959m.z	14.8559308067941	15.2877494222476	15.0347590440696	14.7077926901058	14.2062958058204	14.280352389687	14.9160548929928	14.9053137578503	14.739372836401	15.111431595838	15.0276570647932	14.9948711961658	15.2408478427268	15.1492266255698	15.424595094849	15.075782079625	14.6000833828885	15.2153010025193	14.8429352361292	14.7721896120758	14.8615661575535	14.9617164905174	15.2632898815882	14.5214403599879	15.1275797316455	15.4883427135119	14.429377110467	14.7874824989164	14.8030278419239	14.6346555809381	14.6219553590101	15.2208499257056	14.6627647710367	14.8706666093734	14.689050140456	14.9745757928689	15.0832775111216	15.196976903788	15.4166272759514	15.2622810167794	14.9216920466023
X2.35_1013.5109m.z	13.0872299372474	14.1465129995222	13.7795173002194	13.7052510893389	13.5117003924374	13.3201440724498	13.7748694117446	13.4333229538238	13.6484277908528	13.7767533172883	14.0895475555014	13.8590121465103	14.357000488123	13.6276500859986	14.3869521812231	13.5436328064712	13.4756431972106	14.4323330541206	13.3400568339197	13.3481753466927	13.7747682920458	13.7263857379607	13.676710650315	13.4538222936735	14.0047105335097	14.5497372210418	13.2673757252569	13.3815006695939	13.5786263572227	13.0751514038053	14.0007651337153	14.2743107870443	13.4134983053574	13.8252752358345	13.5473229944806	13.5717691156538	13.6839842110287	14.3701138812745	14.1644347734602	14.0188844601825	13.7353444934619
X2.35_447.3194m.z	11.6045188602402	11.8847243138693	12.3305090502168	11.1248358031487	11.2027877689952	11.6208880872395	11.5607945955379	11.4435510313872	10.7408325533516	11.8109288857749	11.1776167792487	11.5598588773827	11.9384479316158	11.7522686799254	12.0518858354435	11.9021939970926	11.2378240858015	11.4544169134919	11.7248754789111	11.2988265162152	11.468590739339	11.6148157299043	11.5756945355892	11.5017695477194	11.3556214361422	12.0153972961751	11.4256367672548	11.7715447820526	11.0490493018334	10.9853981597032	11.4327164560555	11.4423111275221	11.3487641697634	11.2460566881693	11.3485827118759	11.5960250743998	11.5341299598756	11.8664656523592	11.2131833218028	11.4631905471188	11.9025589600311
X2.35_1191.3606m.z	13.7527173171017	14.2215354414199	13.9695284404149	13.2800031479552	13.0058424691235	13.8385362376135	13.9512878411997	13.4191165290081	13.5727168769327	13.6876455392914	13.1516204770305	13.583928644291	14.0142961459394	13.0429490299029	13.7219324695411	13.6780227432986	13.4881896732461	13.6814474594951	13.8998373747345	13.3469034998718	13.5759539042341	13.4866247264351	13.8865198579066	13.1373764995937	13.5553064455133	14.4140438322449	13.4591357920431	13.8457803624623	13.4655236524266	13.6173407827781	13.1062465906622	14.2808369119162	13.2529269936037	13.8577714969914	13.6346386764464	13.536994566827	13.9017123710524	13.923294873506	13.8690026097559	14.2076809860045	14.2474113352439
X2.35_1009.2680m.z	16.2226450063779	15.9525886063353	16.1477863027132	16.0953745470709	15.7255433941201	15.9732761128735	16.088188023022	16.2300750799733	16.1323811331364	16.3684485370487	16.5221205223283	16.4409834791218	16.7062528620795	16.4449853619944	16.6255806396518	16.6256388087739	16.1609225849655	16.5364093036659	16.1042072796345	16.0640853348967	16.176752747583	16.279427797845	16.3509497394553	15.8021912160235	16.0530452373706	16.4704756725378	15.9809619701124	16.0171297887831	16.0347489703345	16.1340523173697	16.3902513248409	16.5323755241966	16.1584907724629	16.1620010696389	16.3837761184026	16.1058089421556	16.1834408522356	16.3360519548256	16.8479056983391	16.4826733944794	16.2772141489312
X2.35_1409.2874m.z	16.5735439169386	16.3929071802601	16.424598399111	16.0618711879033	15.7961414799325	15.8175325652434	16.2074956957249	16.4834923371705	16.2782470157636	16.428445393019	16.7295999523186	16.7236048482631	17.0725137009561	16.3808088462917	16.8235023415142	16.7393133048086	16.4328515980661	16.7555386520705	16.2098968572536	16.3771728636358	16.2374104668092	16.3695772440404	16.5568664211144	16.0334242909403	16.3357419646198	16.8485017159305	16.3093975241995	16.3314697234798	16.1966823377386	16.3359804651807	16.504421188448	16.5313525887971	16.2275296250626	16.1232303072993	16.5667423646452	16.5388027134389	16.628373796141	16.5898579651399	17.0280822872615	16.8040577852813	16.4424584969556
X2.35_1142.7740m.z	15.8557013843373	15.7534716570357	15.5804647150463	15.6515192635308	15.2134927954728	15.3450838661618	15.3420613487021	15.9045263054832	15.4786643713113	15.687025313753	15.8535520149668	15.9755345991822	16.3321984210437	15.8362043488325	16.1268214424403	15.8388845315648	15.2742297357563	15.9480052990952	15.6397283929622	15.5247269014574	15.8007081521175	15.7840780023836	15.9600799263265	15.3933870297314	15.3999380617415	16.4215698795847	15.6817271381725	15.7754111473686	15.6392301953166	15.5018530861585	15.8013699289167	16.0053074693436	15.57665468719	15.2862884160645	15.7992338866462	15.7556258469286	15.8941384579377	16.2402416255852	16.3796068579134	15.8194316215734	15.7229925863387
X2.35_1102.7719m.z	15.3846289904918	15.3529277539349	15.1400668878879	15.2220987121931	14.703502236022	14.949641451721	15.1410290212204	15.391784985579	14.9753331450626	15.3738313151881	15.5664367294584	15.6203477667869	15.8920482681915	15.504317174228	15.6845575364966	15.6009077347824	14.960024689512	15.5885925486905	15.1229601596221	14.9760832821701	15.2380404352291	15.3842614930928	15.3567808275743	14.6711469780821	15.2715280802434	15.6938676352548	15.3768958676345	14.7211128259681	15.0073186714476	14.9628474638008	15.1975201561299	15.4228457016333	14.963659114191	15.0707503729902	15.4897776545352	14.778168342044	15.4221664410607	15.4207263430815	15.5087778447399	15.3526157032296	15.1601633477816
X2.35_1170.5235m.z	14.8128559913238	15.0087680317967	14.2244742611018	14.5422848180896	14.2942947340489	14.2992147294852	14.3513707413847	14.94673208691	14.677633994648	14.2975644261849	15.0598554663349	15.1316159753436	15.1304704969931	14.6155849123769	14.8661054440506	15.0160144718371	14.5985381969745	14.8639013407645	14.2949477746888	14.7548092016841	14.9145148321914	14.8058692385409	14.8577793420247	14.6364763664046	14.8099722997153	15.1402665014651	14.2996094108983	14.8766614696859	14.6319914126592	14.2976454861167	14.1032376412212	15.1708406986441	14.6622352337596	14.7022514364126	15.1682452833627	14.2860753253307	15.1164544015741	14.8740209655462	15.1510277144927	15.0248595970173	14.8641467378354
X2.35_1157.2728m.z	13.9459355905962	14.0166893679136	13.9626078586875	14.1629034728295	14.1885246449452	14.0948491175975	14.3570480867633	14.3978516432983	14.2840828042763	14.3451785453797	14.3756469394658	14.3836496107378	14.7162583672446	14.1702314785084	14.306115501133	14.7394089901645	14.0124142368272	14.5516165390491	13.9341728894627	13.8183468194331	14.1748422995403	13.8306943430525	14.5751295821173	14.0929084959901	14.1393073406605	14.7475931143443	14.2210285006954	13.7223000431558	14.1199936718712	14.4108372819153	13.7727764990299	14.4713259564471	13.9662859439649	14.1780320350982	14.482774465401	14.285468842043	14.5481001982763	15.0030099428905	14.2911339922505	14.367765216112	14.0356765448474
X2.36_1424.7847m.z	19.3960121580936	19.4815199945346	19.2792599237236	19.1550338848512	18.6885525261085	18.9479206177035	19.1520762400462	19.434926355085	18.8718347683994	19.3158570938872	19.5607035063111	19.5631155147702	19.8972656298422	19.3943809256735	19.6864192678859	19.5290751252283	19.0023080980793	19.5351795381354	19.1159675026347	19.1870474354745	19.1805402635868	19.286048397177	19.4934915982134	18.8572216099947	19.3395094447296	19.8925106602371	19.2584988847968	19.1303986149926	19.1058676737858	19.0492668542805	19.166351271938	19.7116706800823	19.1237830715663	19.1376463943153	19.265028336937	19.1694827659552	19.3347665212866	19.5635152177511	19.8649408927035	19.598085250006	19.284401232474
X2.36_1255.6229m.z	13.9443800276706	13.9417389407984	14.1965121295717	13.4020314191111	13.4078383450346	13.8170976968628	13.8322916975264	14.0761047875655	13.0993091998449	14.3757189294414	13.518895848619	14.097580645247	14.6709728623464	14.2243051562723	15.0594143968439	14.7575521199116	13.1229620234321	13.8705945968359	14.6943179262324	13.6214517041734	14.175487092232	14.3674457551314	14.461671482709	13.3286824439682	14.0614026657194	15.2012684924116	12.3172590518414	13.8161631786145	13.7098829798459	13.9264670568361	14.0297669119604	14.3739538820487	14.2070133381381	13.7138410576032	14.3007736239597	14.025190472974	14.3972757867025	14.8387963750706	13.9844403565754	14.7126103223464	14.2652862323158
X2.36_1171.0229m.z	15.3621133342595	15.2782183967103	14.9758801771865	14.9548898458861	14.3643667419334	14.9035255875478	15.0189190169566	15.2553275840281	15.1235410779557	15.2588749181116	15.7256423887609	15.4179188121877	15.7137244706977	15.5091688102593	15.2170350858434	15.1875717955721	15.2755675272402	15.3641047925302	15.218554852792	15.1939609332506	15.2766620142849	15.0171221050134	15.4705354919596	14.8284295802278	15.2441027675316	15.4119203337054	15.2381672345222	14.8610987903496	15.2447307197881	14.9656193313007	15.2057722946478	15.6320657639637	15.0931678732057	15.1577629779578	15.5399671939266	15.1149689259726	15.3304996258838	15.5609016152818	15.661533881895	15.5272902765101	15.1994657118426
X2.37_195.9756m.z	18.5688030145193	18.7719470747304	18.4111487428436	18.0879266728688	17.8638927863005	18.1525968540492	18.1710544908132	18.4253200992569	17.9615111306404	18.119700981991	18.638747699678	18.7697399301069	18.7565295327599	18.4582026504362	18.3516784997442	18.2390950226531	17.9320949392842	18.3801382879747	17.8214567119648	18.1726015077417	18.069333681859	18.3826925885476	18.2027925243213	17.8963279845869	18.4388762648652	18.6419300149964	18.3563592269888	18.097917821243	17.9445272724611	18.0983263591518	18.1555828353062	18.4349657369048	18.065818835949	17.9919334765229	17.9122335726865	18.1944753332483	18.2314635099106	18.1381154853391	19.2280070105494	18.6937681634762	18.2055643502031
X2.37_1371.0317m.z	17.7251997276779	17.7135740400808	18.1420925314411	17.6934761966664	16.9752998144101	17.3453081900343	17.8411085310657	17.8766527896669	17.6450124534021	18.1527631514202	17.806032084146	17.9787046498518	18.578675633224	18.2116739283065	18.5600881565304	18.4487564604501	17.7878897641972	18.0805674904751	18.2426515648495	17.801840820362	17.7741771263684	17.7291864186621	18.4966108451783	17.7001858523677	17.7514456741339	18.9098784350573	17.2807896156542	17.8686697765412	17.9613487828301	17.7755653979492	17.8380189070982	18.4433355385342	17.6791143393964	17.8088130683694	17.8788404864016	17.9426881100734	18.3679699204019	18.6514877867667	17.8615289730617	18.2547362776123	18.0947324144133
X2.37_1255.0236m.z	17.2089055723679	16.7345924142494	16.6738874344808	16.7117173578164	16.470304865345	16.1541370406446	16.4575451709113	17.0375131679503	16.3992374747996	16.7137733498263	16.9994503704856	16.9885001546284	17.429308194773	16.8290057064991	17.0156308021035	16.9063956514752	16.5434459499816	16.951239253374	16.5237577078527	16.7616739563556	16.7184362864597	16.641970073289	16.8720494673772	16.5597638830373	16.9526487461297	17.0603054694266	16.6866824667403	16.8011208113996	16.6672351288393	16.7300402639533	16.9072643014689	16.90618897762	16.5691822074136	16.5101480132826	16.8212223849723	16.8125197771541	16.6773647132447	16.8071856359408	17.6643224562065	17.0204910293523	16.7000213247077
X2.37_1332.4240m.z	14.3938566673796	14.6180988155683	14.8253768277917	14.4163988009562	13.4372548782024	13.4745280338215	14.479442092051	14.5581624691089	13.8136298236945	14.6090656518035	14.2443317254183	14.7479424955796	14.8808545210505	14.3667106508959	15.1583639922207	15.0468058155015	14.593267787027	14.5369405092161	14.543621180226	14.5677435692551	13.7650804538852	13.8996061583349	14.8095350352939	14.2979540788282	14.5671953893627	15.4996851466708	13.8112125149313	14.525134309749	14.5291139471083	14.5485796756555	13.8841673031348	14.4835055708392	14.1850257683134	14.6055039194633	14.5360593174864	14.3858856512789	15.0937446951407	15.3144573996739	14.9133156347148	14.9182461130282	14.7421108742518
X2.37_1343.2810m.z	13.8601461145849	13.3535494000557	13.3325578858946	13.6540458467185	13.3634239276855	12.7879015108998	13.0785184269657	13.6332138398113	13.1951935705594	13.997276888998	14.2023919470017	14.0515338676799	14.6252566802396	13.6281414193039	13.9033240421522	14.4435809731073	13.5456498383167	14.5972601362985	13.3894267396362	14.1235277893852	13.8455301625379	14.2234095915695	14.4126342943819	13.7219661547649	14.1196459536592	14.8483881053863	13.8693480930605	14.4295071360869	13.59895550351	13.9085289948983	13.7198228745964	14.1740739431916	13.0772697084053	14.0414450614713	13.3058707254944	13.5628668256653	13.8716254089476	14.750709459024	14.2017942026342	14.0118578929425	13.8355703248563
X2.37_1396.5347m.z	16.5277002739615	16.3591494982021	16.4375639459752	16.1517957240785	15.8405597818556	15.9402408613356	16.4492704005043	16.6748900285504	16.1074745211998	16.2433407475931	16.409250364763	16.5632711764743	16.7487204532107	16.6001454880293	16.883266760441	16.8314707745387	16.1363312994157	16.4813114754003	16.29746686124	16.2893793206032	16.1851205915617	16.4730456944752	16.5402470116883	16.0967019077503	16.2227556794914	16.950134145932	16.5048820412125	16.1703845464994	16.3721774103307	16.2960876671415	16.3441323317066	16.5828901359843	16.3047040279033	16.2805892483367	16.4756053852315	16.1932085628668	16.4462821680171	16.5130891886016	16.7945109979874	16.6350489092396	16.6463665871003
X2.37_532.9950m.z	9.33884804003473	10.6138791785127	9.92273800825119	8.37973370030396	8.46938337440597	8.8144719093998	8.75859908727195	10.1028776296583	10.1142844827768	9.54074486182406	8.56525593881244	8.3361823529575	10.1127643973308	10.0815784532405	10.1483631253102	8.95261833239771	8.54003998075694	9.85748536304116	10.0249892272761	9.15122695871556	9.33219742417895	9.86279858114641	10.1142622361668	9.1081569972279	8.63839927769113	10.3847766627726	6.9272174320295	9.64467311699489	10.1587366548364	9.49337161156524	10.0787888041861	9.15998640361262	9.48875599804303	9.86880505947308	9.55059733198213	9.95670933609138	8.5083022857735	10.3847357607568	8.97798467080122	10.1524395698251	9.97200787518377
X2.38_279.0569m.z	12.5780260279641	13.0748401005633	12.403261829479	14.5514271777196	16.5638344950485	15.9056479002082	16.3446203520281	13.1944596138804	15.8693379909207	14.7684473177609	13.2027215116347	11.8925027940023	11.3022889816907	14.7077319575406	13.8089227897476	14.5065238697406	16.0474593338725	12.4283706946019	15.7803396024235	14.3490541778106	14.6165647665867	13.7456035986822	14.1110277450615	17.1738260598081	13.605522193355	11.9301439946258	13.8838756870767	14.8765979935659	15.7487999506504	16.2893794155915	16.3684951248927	15.4668295560336	16.7845544828947	17.1444415337902	16.5464207044995	16.3718560880946	16.7162514139527	16.436958004132	7.02397199556713	12.718820819536	16.1190825885652
X2.38_1223.2224m.z	17.5928193989049	17.7412968636892	17.3877212101791	17.3264416864539	17.0016500574405	16.9965231036372	17.4477697204958	17.5296503656267	17.2908792991048	17.645029974387	17.6158861486165	17.6884287358168	18.0753753546437	17.5599543864707	17.7144692884231	17.5935679574838	17.2917848843769	17.6953919281077	17.3753020840325	17.2893792399006	17.1084280751383	17.5344942234059	17.6560578542965	17.0745839100718	17.2966777827958	18.108672229968	17.4749505930263	17.3159638218418	17.2619350174503	17.2102325101044	17.4846731724018	17.7392149754038	17.084241400424	17.1901273784841	17.6115558502489	17.1135123929342	17.4042483318771	17.6737114039174	17.9274988071334	17.864413887476	17.448985131285
X2.38_908.0109m.z	14.418075583998	14.5862770982837	14.5285208966575	14.3117081781008	13.4775696371583	13.9190024023338	14.3856206494592	14.4572004543063	14.1382219469764	14.4135599741377	14.1565191383788	14.4451684012384	15.1869767623759	14.5007551165814	14.7866992632657	14.8181111529627	14.2595447912464	14.1993587470638	14.6902987025723	14.3417765635606	14.4671868107484	14.5495096959362	14.6309842270811	14.1022276537713	14.3986604175282	15.1685957807764	13.8097151710385	14.5024252903143	14.5396392218344	14.4759417081369	14.011943694792	14.6769826130138	14.2280902454765	14.1537808762694	14.3143005960017	14.4300908522426	14.4922935170135	15.0923173987183	14.1139326478176	14.8756372488461	14.3084640301445
X2.38_1131.2705m.z	15.9665136288546	16.1789294774344	15.9376144780575	15.9774216957902	15.6716855716635	15.546980749145	15.909925520813	16.0842557709713	15.54575747075	16.1374607928349	16.1224478068002	16.149556681412	16.3984581154784	15.963651656503	16.163373572557	16.3827011188573	15.9089122257849	16.259902960823	15.7453012605836	15.8850779354484	16.2442387897237	15.993167785975	16.1562459935404	15.4730762403221	15.7949694371718	16.3661243433575	15.8523152937439	15.7005811215752	16.0089846572461	15.8377085432933	15.9929462573126	16.2674067186216	15.8869993146531	15.8674898794786	15.9516072444402	15.7159563594793	15.932617666321	16.0815779081544	16.6325840659274	16.1893353383014	16.0844221405599
X2.38_1253.4266m.z	15.467229165681	14.7612598820926	14.6912673019255	15.0743977094085	14.6996140605738	14.7150956111122	15.4056167812631	15.218340153606	14.6001028535531	15.0239774034899	15.1631382701281	15.5519054088888	15.5496044333641	15.2007955735595	15.7944132068482	15.4873898660287	14.8983883490443	15.2502020773626	14.6802697029569	15.1270058798566	15.0077282372601	15.2133331416162	15.4702292783664	14.8303806851408	15.4843368033694	15.7845414162949	15.2228844659337	15.2217168992114	14.5648641811352	14.9120883269577	14.9947652518677	15.6148359626596	14.962771553742	15.0375369648146	15.1735977598578	14.5292679419352	14.9232905849894	15.3200778099075	15.7524621227135	15.5785096399598	15.205344557207
X2.38_1243.2254m.z	16.2568865540896	16.3911761373668	16.1950533558032	16.070162301778	15.7816977086255	15.8247343382693	16.4820905753993	16.5058630583455	16.2637159134136	16.5356005916989	16.5231186421322	16.4784253639395	16.6766812179567	16.3601995111239	16.7778373465874	16.6837264396805	16.1991650078799	16.5656220264797	16.4149852311962	15.9992273137702	15.7739754194977	16.2549921720087	16.668542285922	15.8527874368998	16.2234408684989	17.0915421637917	16.2936058667918	16.1392307016514	16.144462435621	16.0373348853852	16.251462943015	16.7682937010985	15.9490370883615	16.1481031870132	16.6196322140444	15.9243389435025	16.3375636315922	16.9026064795598	16.7185929675509	16.5682135183766	16.3739619683315
X2.38_995.0186m.z	13.2867651870606	13.9009978642013	13.3402334622664	13.110356906908	12.460973882017	12.9668449585396	13.7286304605116	13.6577292676507	13.8376320490965	13.6072528845675	13.2487321490899	13.6916549563884	14.0254414837645	13.3184800789521	13.6200137601556	13.5499912479424	13.1042123213054	14.0032416862893	13.12295750144	13.3876907239636	13.2921213561965	13.4062060523041	13.5918943349942	13.4427597494163	13.5466718987141	14.1443786251129	13.1947140438189	12.8503213728586	13.2969014511906	13.2908191797893	13.0899269714311	13.5597955982972	13.754637313984	12.5983755770024	13.531670221156	13.4114751963484	13.261984188232	13.3973704648537	13.6155312250861	13.5063558834433	13.1158880135699
X2.38_1370.5323m.z	16.3075434252102	15.9395735549429	16.2838106627289	16.3593276021953	15.5211034301646	15.6705808731995	16.0743492642897	16.0239672129363	15.8649093865298	16.2462252878247	16.4139340815091	16.357453950953	16.9181357102111	16.3710615758416	16.5307418204691	16.4561461117311	16.0677686442818	16.4462127423209	16.2315471672166	15.871465374204	16.2269465721261	16.2055800082321	16.2740367459496	15.5524519049599	16.22050882958	16.8378375542997	15.9817921599298	15.9510892506281	16.0937424047656	15.6151304962226	16.2008872353256	16.4070380147936	16.0252113314946	15.9009881814717	16.4561984129712	15.9692304117108	16.1669962495959	16.5539227088885	16.5804779774472	16.5084689853715	16.1947980070478
X2.38_1076.2704m.z	15.3722617094163	15.3100470056798	15.0791883815927	15.0482068242492	14.4439887939655	15.0996524415482	15.3096319965832	15.1268690171094	14.7256815188865	15.1405835053981	15.3297367468136	15.4135681612687	15.5943489944718	15.2662348176354	15.4878731656968	14.9915958835308	14.8005426271595	15.0566657452538	15.2717569446176	15.0122676233783	15.0903106064035	15.2665975176142	15.4094953917677	14.708188940361	14.8878583743519	15.588348784554	14.9588119669416	14.7552325298635	15.2614643730632	14.6875480851122	14.9520564147249	15.6491321696573	14.7733672514569	14.8902328131335	15.0805009167836	14.9750996281409	15.0968618959336	15.4557926116305	15.8821917704368	15.4468354823531	14.9475314146274
X2.38_110.9156m.z	8.5146712607627	9.05883034448863	9.3054708033097	8.46089685484239	8.08386503521368	8.23312891410667	8.79948038484309	9.08326761778217	8.09798746355183	8.6713991759224	7.68052698956133	8.735176364451	9.00650185682837	8.85751715039839	8.83313007324045	8.77812367517156	8.69659424182543	8.28305560594156	8.94077043493542	8.84533296692045	8.12192617036067	8.22249692729678	8.81990643504701	8.85839615116734	8.58247326647666	9.02905531056826	8.16179352068285	9.06767094935342	8.65699851274111	8.51352609636373	8.92486228423567	8.81993854914633	8.17850552336343	8.59825525996729	8.36501672573138	9.08850216076188	8.56462995424929	9.13528141529154	8.9305208853894	9.29488960596141	8.60213332899507
X2.39_1052.5158m.z	17.1373027547128	17.3204234551417	17.3275098851389	16.9020336815269	16.4403398988965	16.6270319070852	17.0328542238679	17.2342810063751	16.7841235218893	17.2641855922116	17.0532495739933	17.1095811213196	17.7031044032019	17.1990769869127	17.4794991908124	17.5433129333764	16.8512422953777	17.2531287193781	17.1825780852436	17.0034027062122	16.9069643319143	17.0140309702622	17.5586292731424	16.8648629158587	17.0004941918803	17.9790224357172	16.8244662021694	17.1476220845725	17.0800183866525	17.0221741766517	16.9104022053651	17.5607969666047	16.8954367881795	16.9990944999965	16.9541778737891	17.2274918593622	17.4533152023276	17.6875804125007	17.4095689316734	17.5454961820416	17.2249471817344
X2.39_1330.0270m.z	18.3911368414503	18.4117514029242	18.2178506162406	18.090849275279	17.8330608014042	17.785611211272	18.1526061023252	18.3900430717173	17.8402594562957	18.2284135443193	18.3033404258089	18.3754100811271	18.6852916577028	18.3224809303063	18.6077383523937	18.3640750390721	18.0223258278571	18.3662757014091	18.0851066173269	17.9522581470991	18.0286298734226	18.0764131277423	18.4853352592226	17.7772616987542	18.2521182929753	18.8482720626648	18.2150123797616	18.1146690085321	18.0974560699203	18.1329301240685	18.1934732332277	18.4153201208674	17.8707510067485	18.1379971305784	18.2285738803099	18.2770526180538	18.3300386776204	18.4353243510438	18.7169016988531	18.5693158260642	18.2469985746849
X2.39_784.5043m.z	12.7459325071828	13.3977392136259	12.9894697046653	12.7960399027274	12.5493017996996	12.8706971211095	12.8106752568758	12.4843576730696	12.5291773765814	13.13416766283	12.539823825117	12.5000070129551	13.8123889022814	13.0581475288739	13.3255793636458	13.1707968855783	12.8451239473953	12.804630741984	12.9954247562156	12.7109497452592	12.9550116816229	12.6992738415733	13.4358486580364	12.6617485385017	12.1068234920116	13.3794810176259	12.6640689910868	12.7549357204562	13.2380249598055	12.7768253069264	12.7473599073272	13.5746472339402	12.8318521247813	12.7704598281933	12.7759537372554	12.980317563341	12.5644684786067	13.355352114883	12.6923090223153	13.4667413956571	13.3397433761918
X2.39_965.0094m.z	13.5658599371407	14.2115913179795	13.3321267913867	13.3243312885113	13.1220265963425	12.8733797717317	13.6618877127216	13.6818860132621	13.453736361607	13.8826209132006	13.948572484957	13.9353590292489	13.8019975571932	13.6599383833861	14.0027059846619	13.970277954243	13.0293377841857	13.7708157816412	13.8470584855854	13.6757626763508	13.0756479713185	13.2028151051768	14.2014049535594	13.547165320207	13.8999220798267	14.4205272086087	12.6261527016492	13.6123908673867	13.2591263917072	13.5941812251597	13.7411740013628	14.4114178615867	13.4969825469411	13.5902352520338	13.5629366563148	14.4056494891343	13.8378365098795	14.4561896968282	13.3739251083535	14.3109080060203	13.9712368448524
X2.39_747.0055m.z	13.5292220013957	13.4848692064786	13.8209539940848	13.4807957508961	13.1146638849151	13.382333458516	13.3010672139278	13.6882619340963	13.4473176395746	13.6979211257063	13.474591473818	13.8195398540728	14.2652052419037	13.8910484377449	14.1644058261661	13.9141452545491	13.2397997650531	13.5802388119044	14.2242681047077	13.5908852610321	13.7305342325448	13.3840720684604	13.6782861370616	13.1000237443297	13.2461684324953	14.3995586258876	13.4184983216695	13.8067890336716	13.6418105608262	13.0976627492309	13.6078133993071	13.9027025928324	13.5318120080177	13.3798198547147	13.681653785532	14.2060188531204	14.0128502664647	14.3665177502628	13.8782122740126	13.7377471628865	13.6805848232677
X2.39_1010.5157m.z	15.1143255880745	14.8703183876821	14.7093304665059	14.9824714524115	14.2121738086688	14.7489831218742	14.7231605223963	15.4074888386754	14.9244916127608	15.2358403924193	15.0446573534156	15.2155561423831	15.4286717343637	15.2136608018831	15.302430403222	15.3435315406193	14.979975639161	15.1099342697917	15.0537497900157	14.9690381874083	15.3313590069064	15.1655664740342	15.3608551088635	14.5988850900628	14.5685362726175	15.544856295772	14.9089202267184	14.8318149038296	15.0007238469854	14.6499684410648	14.9269959909091	15.2273083532004	15.0534682337219	15.0426780503756	14.8523249541093	14.7151699154711	14.9143267550993	15.2741994095236	15.4362420245469	15.5072391391824	15.1009185480546
X2.39_1182.0269m.z	15.2336196853521	15.2880485427099	14.6451562039576	15.0309400815597	14.6571931663951	14.5441042232812	14.7583915911363	15.2083564078772	14.7518358595235	14.9842842612807	15.4167050295139	15.1102727539597	15.3633579820367	15.2547992605467	15.0371461947802	15.1719959144889	14.6798024875838	14.9130953420018	14.6194206651468	14.9035194448084	15.0819614031733	14.7840201092011	15.3503144313884	14.706153239091	14.9359944587426	15.2891542779654	14.706372099879	14.9331530809358	15.0359343641587	14.9920601546401	14.7127730220586	15.2621949849386	14.8616864435511	14.7761741083731	14.9557405575238	14.7923546007096	15.3007969670588	15.4602371930822	15.4425965167673	15.2280006196828	15.187545727125
X2.41_1092.0178m.z	17.4660287259373	17.4447589310864	17.2602161620748	17.1828379311361	16.7062841570411	16.9978949513111	17.1839257457848	17.4935934986001	17.064617526398	17.3984406788485	17.5752055070204	17.6721676545199	17.796102335156	17.3462465662878	17.6196272739871	17.5370332109889	17.0725762062514	17.4946794696346	17.1866458237592	17.2576507696644	17.3137301391004	17.406872872948	17.4630992373273	16.9431615738746	17.0950138128453	17.8680890686881	17.2253100230529	17.1568562191081	17.0245810092335	17.0234765852965	17.2617480174287	17.5750905999545	17.1799237996591	17.1993687308426	17.315114749126	17.0766751020352	17.3070829831501	17.5468232253231	17.8972113963745	17.6068706062394	17.3347652646956
X2.41_1319.4266m.z	14.3624887027201	15.2092889341056	14.6177754885274	14.0432735055428	14.2411887444411	13.1944898171701	14.5811896928817	14.7614713816598	14.2622824227269	15.0333890885741	15.0051090808484	14.7292292760966	14.8013735474668	14.5634109835877	15.4811047229417	15.1331071483736	14.4217364296157	14.6486415999446	14.8645204665965	14.4521487853422	14.2994104345867	14.5090851313013	14.9851460851083	14.5905689176477	14.8139962351322	15.5161004283319	14.0403295378403	14.337749336386	14.5256203755848	13.7727360013971	13.9829515862533	14.7810033041023	14.1340472132688	14.8065072367938	14.777332568448	14.4819391047898	14.6358226355579	14.895952586012	15.3029033879556	15.1756636496263	14.5638373021923
X2.41_757.0039m.z	10.3050598985569	11.0931420768564	11.101793955728	10.769681569639	10.1895542311483	10.5350298456366	10.8864277049397	11.2375251676642	10.8961594547948	10.8201020921937	11.7835096169357	10.8447965760446	11.9917703598168	10.9577642210655	12.0519436008633	12.0170902735298	10.8519076423096	10.914994207586	11.4769155990631	11.1246118183926	11.1305962227915	10.9225483782796	11.4219250364894	10.3161053359364	11.0517446406376	11.7293525824376	10.635540742633	11.3327627912798	11.7180890583398	10.7080261699581	11.7166893202045	12.1115667842975	10.7371250689238	11.224588923253	11.7460983195217	11.6764230431173	11.7979680287647	11.9718424840397	11.5426760282243	11.1793449405307	11.2607374662005
X2.41_928.7653m.z	15.3364300986534	15.2679817077412	15.2540120098072	15.1267428343444	14.6666712366508	15.0636862368417	15.2521085628771	15.1588340049149	15.117785897612	15.1541549386561	15.6293721110997	15.8563765784526	15.9859109382244	15.4818503320882	15.5017048045284	15.4922266470498	15.3557207468158	15.6032099456698	15.0178281093692	15.18050968376	15.3288612523375	15.4437473742296	15.3340774258827	14.7353144591721	15.3177581133404	15.5610117349938	15.3020994374638	14.5020267336599	15.2852204783881	15.0533157249819	15.1363644590605	15.3434882946932	15.2686509575089	15.2662899275367	15.3572723787156	15.3186643538127	15.172369067113	15.4407501022053	15.7407953393133	15.5871786838725	15.4683931386369
X2.41_1266.4238m.z	14.8413652874739	14.415952089623	14.8699638478201	14.4195903083974	13.6770362785135	13.8488617881555	14.0961520052789	14.8913354899194	14.651151499504	15.1206786592428	14.6926179878307	14.5037253598734	15.4618773029045	15.0224844401401	15.2761201113318	15.0097729651299	13.9110142975405	14.7592801830774	15.1222850580221	14.2625743718452	14.1266192398893	14.3921870258187	15.0224022249742	14.3720355753889	14.6053871798716	15.5481649985372	14.0602421187466	14.6404542548896	14.69616829401	14.1898245902678	14.5338949483137	15.4085720452126	14.2870462292065	14.707721423513	14.9282866957705	14.8289341932366	14.7928746723895	14.9409307485159	14.9102980547501	15.1523373512824	14.8568321546718
X2.41_944.3456m.z	13.948817943481	13.7527709395872	14.0869173762632	13.7953103839514	12.9342327098991	13.0946403825046	13.7863262623868	14.0951921883152	13.6928132426808	14.4105248960106	13.8540808006138	14.3807804106347	14.6294218501158	14.3748953047857	14.4554920115702	14.4168718341402	14.0482818173565	13.9968454619815	13.9741202172741	13.9244923446201	13.8434999817697	14.0124426052121	14.5564109117375	13.4716493652209	14.0803696502473	15.0285029648783	13.3385219268916	13.8548272390066	14.1271159186538	13.5078394449065	13.6759286709815	14.3675045271368	13.7282273986698	13.7075591993064	14.162473297475	13.9051757524378	13.8989660907265	14.6134743155384	14.333482887423	14.3213158061455	14.2802262523798
X2.42_140.9748m.z	18.4104702818364	18.6764269963397	18.2645634344285	17.9543191246312	17.7285273526167	18.0281142464668	18.0265621541791	18.2659183841517	17.7709341942888	17.995686666371	18.5057267580171	18.593335251565	18.6352263984528	18.2779186303694	18.2622329951763	18.1426424974232	17.8092401516713	18.2430332243717	17.6949208872998	18.0414953091571	17.9290990035096	18.2320557984578	18.1058890745159	17.7515591175084	18.303703556247	18.5886287751819	18.213421747658	17.9898155888689	17.8396818566548	17.9643721030602	18.0152479888631	18.3418189059096	17.9315781239841	17.8650116850781	17.8259308835528	18.0396440685937	18.093020962848	18.0941823406075	19.076401085728	18.6430059238979	18.0948557192903
X2.42_1220.4265m.z	15.7754477544136	15.479794884948	15.6157851185343	15.420366294125	14.8968717062719	15.3297470423889	15.600783834501	15.6448782181629	15.7784714872401	15.8957232172008	15.8727193446102	15.7216384397876	16.285527150246	16.1232971499862	16.2442408737404	15.9189942503695	15.4324079712244	15.9366787994681	15.6751069351352	15.7086306338045	15.6657969686788	15.4617706740458	16.0433812114348	15.3813857910844	15.579458007726	16.5615606696719	15.7605272360241	15.4358301872051	15.5881702365974	15.232497915942	15.3477265511799	16.3090461692813	15.3698682838755	15.7268633402093	16.0082053967451	15.1719975269779	15.8180644765243	15.9531667688518	16.0422261848217	16.1189941378617	15.7067030906219
X2.42_106.9214m.z	13.6223517263291	13.7254062832281	13.5172915484499	13.2869704609482	13.0016206811806	13.3116821605602	13.3119986637066	13.5639804125996	13.1597391742031	13.3000832743902	13.7182839169494	13.754596358866	13.8709547994923	13.5311429098552	13.5082959927937	13.4958302185839	13.1760104270784	13.4343022530672	13.1097083000329	13.3914614940978	13.3016039758284	13.4484150350779	13.3883951227453	13.15083044216	13.4675676341231	13.7887724924263	13.400866610896	13.2772298872654	13.2541073601368	13.283387838105	13.3577292157209	13.5507153518531	13.353375722165	13.2372882492089	13.259646576696	13.3959177889472	13.3737827051827	13.5660701451905	14.0008095621164	13.8538119288039	13.3893521996526
X2.43_142.9718m.z	18.402722003479	18.6685363199418	18.2546287694019	17.9530347451195	17.7240861315986	18.0189490711742	18.0193025148732	18.261363478631	17.7749280948167	17.9902157783175	18.4923139354841	18.5755553225388	18.6122622880739	18.2647801526483	18.2614962484828	18.1228579613531	17.8123651448768	18.2385719656081	17.6903324759077	18.0383124284882	17.9348906111745	18.218942213817	18.0953555523567	17.7614850468869	18.288885911176	18.5566126961473	18.2042384406721	17.9880945572145	17.8366921195999	17.9482568057389	17.9997356042093	18.3422542562878	17.9268547947313	17.855170277015	17.8143967137385	18.0303244875827	18.0874969045982	18.1018929496271	19.0666748926027	18.6229646184696	18.0770402729109
X2.43_1222.4234m.z	17.8344718448086	17.8266894253816	17.6066399834752	17.5267219318722	17.1211198727369	17.5043128986542	17.5653194242829	17.9359569222282	17.2070167049582	17.7718773144733	17.9535788907676	17.9877543401602	18.3154159157179	17.8493594097903	18.2485224265906	18.1599448999402	17.5497119233124	18.0592015064538	17.6471362886359	17.597340848534	17.6328090593396	17.6959322537432	17.9538917432368	17.2761551627227	17.7061221977874	18.4458353092856	17.6551843064789	17.3965625454402	17.6061356796345	17.4332463225586	17.7564746154658	18.1871963747605	17.4970283200133	17.5121831444814	17.8710665946704	17.4991843435267	17.8142553514162	18.0367066558187	18.218848231926	18.2310231130574	17.9411832834078
X2.43_1384.5311m.z	17.3709035316693	17.4308452258675	17.2642373458785	17.0418761077266	16.9757719072359	16.7463150633778	17.2097701768539	17.4422880334013	16.9593141639618	17.3376402285808	17.477773429449	17.5804303515839	18.066189233599	17.2207132517	17.8451453699769	17.5608677574528	17.0980980343264	17.3049776556052	17.2979498029058	17.25231086515	17.2312335415284	17.1741232248315	17.660269743157	16.9565814366986	17.5554905669016	17.9554583676517	17.2600466329187	17.3518535575301	17.2211278060259	17.2667635465932	17.4818754770223	17.4972303792774	17.1039959649174	16.9660641905873	17.24564133666	17.3477870226642	17.4900676694501	17.6506038378466	17.8812092869827	17.8919160790111	17.2622163613821
X2.43_1148.0152m.z	10.7147774436565	13.1642732787993	12.3469951195165	12.3408486607936	11.0633560577179	11.3784036755534	12.2560073413867	11.9168183652493	11.9314873375141	12.2484870548839	11.0578804440134	11.626156163774	12.6916120050828	12.121340972617	12.3270355035779	11.9372170831023	11.7817012059615	11.627635883831	12.2539879785883	11.5800248713959	11.9499466218281	11.9857381852541	11.9499469753789	11.4906711492338	11.9514921458897	12.2221235689703	10.3985218460745	11.6876018245642	10.9980129404694	11.6206722601719	12.1656634982671	12.3404104478966	12.1085996558238	11.8013334315135	11.2983676661969	11.594505667025	12.7043107064339	12.6624447826182	13.1602952411541	12.5396891216841	11.6831286160608
X2.43_603.6669m.z	11.7225721995707	11.9838563723223	12.0409690907441	11.1801659818108	10.6389598355207	11.7789633806195	11.7124184050115	12.1631009835523	11.1316083093868	12.4807067221048	11.536183958573	12.4076016298439	12.3852469206591	11.9783323372367	12.237590028903	11.9567302300555	10.909201739497	11.5032806835059	12.3345761794295	11.8800686201347	11.2885909818354	11.3899726345534	12.3783045393878	11.2525439645986	11.6346956439646	12.2875733112135	11.3822793751372	11.8325572287772	11.4539442574111	11.6909057793469	11.7645598988415	12.0750595979161	11.4758151829377	11.241089204983	11.8099466229354	12.5960605858809	11.6394789061707	11.9915225948288	11.0031059460431	12.1986465660072	12.3188374284469
X2.43_1362.0285m.z	12.6055503799545	14.2456858810985	13.6538934681252	12.2523179265568	13.1821994860788	12.1741617546977	12.4266716913691	12.7339478176797	13.0412197022077	13.8148198751262	13.2662834970644	13.1487570360097	14.236418163886	13.0454417931784	14.0764006452315	13.5201453187414	12.527364766064	12.9763332234562	13.9261913314191	13.3863163508048	12.3331201334774	13.3829306476454	14.0187628559475	12.7578695190803	13.0078957945411	13.0906418970817	11.998229935503	13.0680749091391	12.8869025695979	13.5721795638725	13.0205792211056	13.9382093666677	12.3944520049619	12.9532825205575	13.3799788879	12.4807907938341	13.3503754232498	14.3602436177303	13.7238931209502	13.4526054201531	13.7577068103802
X2.44_1008.0164m.z	15.4607515937359	15.4452110386586	15.3135682838725	15.2258192958599	14.9967861706824	15.2021021633247	15.6091048866912	15.6288732462132	15.3863252597327	15.6390247113403	15.9286366799046	15.8463074697589	16.0165922360519	15.7981074819267	15.9084984407637	15.9070689674802	15.1746568092431	15.6501613479636	15.3214501535574	15.5984751850638	15.3301598567271	15.2606960239813	15.5011557027419	15.235243652159	15.3734317429258	16.0800944164055	15.1467967905896	15.3134332051524	15.3910043625327	15.3295542416988	15.2846872207831	15.9003864474775	15.3488731631338	15.6514769910482	15.5477819230295	15.3126845600686	15.7270999835183	15.837093211973	16.0673933584663	15.7082783451346	15.7067600027148
X2.44_879.0063m.z	12.2933300256356	12.5237745453818	12.274835009727	11.3519372973124	11.8122180265804	11.3237348505373	12.3699941097439	12.1895428663413	12.2025093840878	12.0888717022293	11.9855007588566	12.4675587056824	12.5663316423472	11.4440731100461	12.8948985886911	12.560232673107	12.2873568171817	12.0935565022118	12.760539960912	12.3404681733914	11.9144434881174	11.916633256579	12.5316651037172	11.1902952116201	12.0013864974846	12.7596771846495	10.7914777572412	12.445762362913	11.9661624172057	12.0902090463114	12.0809754942904	12.0059521381635	11.4515862527019	12.594032729479	12.2391092646915	11.8007282699667	11.8806894717161	12.6898223217772	12.4716109674536	13.2935773726766	12.0714078211846
X2.44_549.3323m.z	11.1890454350029	11.2377388583452	11.3681810534475	10.3256439026747	10.701721885172	10.9295447644044	11.1046917846754	11.8872042018352	10.3506110010466	10.8026476633146	11.1457152698359	11.1960419724799	11.7714596610243	11.2463101240856	11.2739827672433	10.7793292762015	10.7035589156656	11.2680676881009	10.866585136944	11.1106198321692	10.1581025322888	11.2057779467139	11.4182468638829	11.0655514571402	10.9588975957659	11.508361928512	10.0371097969771	11.1953473576786	10.5527389977734	11.0062019006196	11.1844457195884	11.3699160985532	11.1498446566104	10.6955127450306	10.9601254596896	11.1034643369883	11.340421040791	10.9789766381072	11.3066126748639	11.4234296756055	11.3610776894764
X2.45_554.9900m.z	12.5268500725814	12.6341469199928	12.644271132855	12.4894653815129	11.6485940827633	11.8695396623446	12.7179197141176	12.7396690960209	12.6849546542905	12.2613065704984	12.7539604913347	12.6800563064073	12.9922753390495	12.7291108468723	13.0537511808607	12.5829410522287	11.9210155887235	12.8854120789876	12.4671236920522	12.4187757720558	12.0281068647108	12.6590326085175	12.5478337613067	11.753137677849	12.7215669489582	13.0622596641611	11.8610022762608	12.1120705749668	12.2057774586241	11.7910380006697	12.2403652099762	12.9755475538457	12.3872499152959	12.3426926969735	12.3842211728081	12.1558761464699	12.473564461124	12.8183972197646	12.7085504076022	12.7638256259907	12.3740647594451
X2.45_1305.5259m.z	13.7156650484667	14.1468882253978	14.0960485053881	13.4019050982193	13.3003967007431	13.3922046290747	14.2871520788232	13.9607893892634	13.8703251380468	14.0820319588003	13.7093141079924	13.4683350640189	14.2780309217114	14.0972938376044	14.1395599470814	13.8463487373479	13.7777386878625	14.1067204988773	14.0685870778463	13.9154065908736	13.9830561199035	13.6519356929606	14.2222941749793	12.9341795840783	14.1967399642908	14.4683617667691	14.1435191826173	13.5007969318693	13.9763773114381	13.5075324693522	14.2372128791628	14.39263809043	13.0151041382361	13.9422833759521	13.6564741371376	13.6779188869841	14.1102005707147	14.160135731314	13.7987884320971	14.2225529618704	14.4456786675978
X2.46_428.9859m.z	13.6899962337443	14.5225207532948	14.1044221995906	13.5229030578807	13.3715517910299	13.2535334128577	13.8678374643559	13.7513123550971	13.7887772274322	13.7325084940333	13.9286168313772	14.3519223437393	14.2162952296738	13.9898182643304	14.02309201105	13.9758288833506	13.4246736851595	14.099912781214	13.6235113422377	13.7485649310871	13.5158214032129	13.9059699878197	13.9439132539486	13.6093344129331	14.1013724024792	14.2867600930418	13.4627226817068	13.5488362835882	13.3765990241786	13.7250375680996	13.7317702020941	14.2052332194997	13.4192486748362	13.7471147843568	13.6443896582838	14.0561201126052	13.919920573586	13.9069804872485	14.6026480044699	14.036488808419	13.796850869713
X2.46_1063.5194m.z	14.623638764171	14.5484988451582	14.5917928675753	14.5409698709949	14.0329704805404	14.3885174187985	14.5415894312627	14.6915437617876	14.3203625454736	14.4396072030568	14.9157048172876	14.7084496692172	15.3780456839576	14.7648344377299	14.8941342578955	14.8610242322389	14.1312921270209	14.7879526797937	14.5473340821662	14.463936386994	14.5735531232774	14.4809168229761	14.5201648760397	13.788185223032	14.2509378453872	15.0236267163798	13.8358542802891	14.3841078621846	14.3834364946485	14.3446048945323	14.7080026199968	14.5648724979987	14.4152025529316	13.5935884415059	14.6418420886157	14.1527708251636	14.6221009157925	15.043590657492	14.9922452306913	14.5584032866684	14.6222400971612
[truncated: 8,296 more rows]

## Sheet: peak annotation
Peak_ID	KEGG_ID
X1.03_607.3905m.z	C21836; C16270; C15933; C08601; C08599; C06098; C13931
X1.03_667.5267m.z	C02681
X1.04_623.3854m.z	C16282; C15919; C08602; C08594; C08584; C08579
[truncated: 1,986 more rows]
